# Supplementary material for: Hemi-Synthesis of Chiral Imine, Benzimidazole and Benzodiazepines from Essential Oil of Ammodaucus leucotrichus subsp. leucotrichus
Source: MDPI journal article supplement (doi:10.3390/molecules24050975), 2019-03-10

## checkCIF (full publication check) running

Checking for embedded fcf data in CIF ...

Found embedded fcf data in CIF. Extracting fcf data from uploaded CIF, please wait . . . .

## checkCIF/PLATON (full publication check)

Structure factors have been supplied for datablock(s) I

THIS REPORT IS FOR GUIDANCE ONLY. IF USED AS PART OF A REVIEW  
PROCEDURE FOR PUBLICATION, IT SHOULD NOT REPLACE THE EXPERTISE  
OF AN EXPERIENCED CRYSTALLOGRAPHIC REFEREE.

No syntax errors found.  
Please wait while processing ....

[CIF dictionary](#)  
[Interpreting this report](#)

[Structure factor report](#)

## Datablock: I

|                        |                                               |                                 |
|------------------------|-----------------------------------------------|---------------------------------|
| Bond precision:        | C-C = 0.0050 Å                                | Wavelength=0.71073              |
| Cell:                  | a=8.6559(6)      b=9.8848(7)      c=30.285(2) |                                 |
|                        | alpha=90      beta=90      gamma=90           |                                 |
| Temperature: 150 K     |                                               |                                 |
|                        | Calculated                                    | Reported                        |
| Volume                 | 2591.2(3)                                     | 2591.2(3)                       |
| Space group            | P 21 21 21                                    | P 21 21 21                      |
| Hall group             | P 2ac 2ab                                     | P 2ac 2ab                       |
| Moiety formula         | C16 H18 N2                                    | C16 H18 N2                      |
| Sum formula            | C16 H18 N2                                    | C16 H18 N2                      |
| Mr                     | 238.32                                        | 238.32                          |
| Dx, g cm <sup>-3</sup> | 1.222                                         | 1.222                           |
| Z                      | 8                                             | 8                               |
| Mu (mm <sup>-1</sup> ) | 0.072                                         | 0.072                           |
| F000                   | 1024.0                                        | 1024.0                          |
| F000'                  | 1024.32                                       |                                 |
| h,k,lmax               | 10,11,36                                      | 10,11,36                        |
| Nref                   | 4740[ 2723]                                   | 4726                            |
| Tmin,Tmax              | 0.987,0.991                                   | 0.692,0.745                     |
| Tmin'                  | 0.986                                         |                                 |
| Correction method=     | # Reported T Limits: Tmin=0.692 Tmax=0.745    |                                 |
| AbsCorr =              | MULTI-SCAN                                    |                                 |
| Data completeness=     | 1.74/1.00                                     | Theta(max)= 25.342              |
| R(reflections)=        | 0.0421( 3582)                                 | wR2(reflections)= 0.0997( 4726) |
| S =                    | 1.050                                         | Npar= 327                       |

The following ALERTS were generated. Each ALERT has the format

**[test-name\\_ALERT\\_alert-type\\_alert-level](#)**.

Click on the hyperlinks for more details of the test.

### Alert level B

PLAT111\_ALERT\_2\_B ADDSYM Detects New (Pseudo) Centre of Symmetry . 100 %Fit

**Author Response: This is an artifact because the structure needs to be non-centrosymmetric due to the use of a chiral natural product.**

PLAT910\_ALERT\_3\_B Missing # of FCF Reflection(s) Below Theta(Min). 12 Note

### Alert level C

STRVA01\_ALERT\_4\_C Flack parameter is too small  
From the CIF: \_refine\_ls\_abs\_structure\_Flack -1.700

From the CIF: \_refine\_ls\_abs\_structure\_Flack\_su 1.000  
PLAT340\_ALERT\_3\_C Low Bond Precision on C-C Bonds ..... 0.005 Ang.  
PLAT934\_ALERT\_3\_C Number of (Iobs-Icalc)/SigmaW > 10 Outliers .... 1 Check

## Alert level G

PLAT007\_ALERT\_5\_G Number of Unrefined Donor-H Atoms ..... 2 Report  
PLAT032\_ALERT\_4\_G Std. Uncertainty on Flack Parameter Value High . 1.000 Report  
PLAT112\_ALERT\_2\_G ADDSYM Detects New (Pseudo) Symm. Elem b 94 %Fit

### And 2 other PLAT112 Alerts

More ...

PLAT113\_ALERT\_2\_G ADDSYM Suggests Possible Pseudo/New Space Group Pbca Check  
PLAT720\_ALERT\_4\_G Number of Unusual/Non-Standard Labels ..... 29 Note  
PLAT791\_ALERT\_4\_G Model has Chirality at C11 (Chiral SPGR) S Verify  
PLAT791\_ALERT\_4\_G Model has Chirality at C27 (Chiral SPGR) S Verify  
PLAT916\_ALERT\_2\_G Hooft y and Flack x Parameter Values Differ by . 1.77 Check  
PLAT978\_ALERT\_2\_G Number C-C Bonds with Positive Residual Density. 3 Info

- 0 **ALERT level A** = Most likely a serious problem - resolve or explain  
2 **ALERT level B** = A potentially serious problem, consider carefully  
3 **ALERT level C** = Check. Ensure it is not caused by an omission or oversight  
11 **ALERT level G** = General information/check it is not something unexpected

- 0 ALERT type 1 CIF construction/syntax error, inconsistent or missing data  
7 ALERT type 2 Indicator that the structure model may be wrong or deficient  
3 ALERT type 3 Indicator that the structure quality may be low  
5 ALERT type 4 Improvement, methodology, query or suggestion  
1 ALERT type 5 Informative message, check

## checkCIF publication errors

### Alert level A

PUBL006\_ALERT\_1\_A \_publ\_requested\_journal is missing  
e.g. 'Acta Crystallographica Section C'  
PUBL008\_ALERT\_1\_A \_publ\_section\_title is missing. Title of paper.  
PUBL012\_ALERT\_1\_A \_publ\_section\_abstract is missing.  
Abstract of paper in English.  
PUBL024\_ALERT\_1\_A The number of authors is greater than 9.  
Please specify the role of each of the co-authors  
for your paper.

### Alert level G

PUBL017\_ALERT\_1\_G The \_publ\_section\_references section is missing or empty.

- 4 **ALERT level A** = Data missing that is essential or data in wrong format  
1 **ALERT level G** = General alerts. Data that may be required is missing

### Publication of your CIF

You should attempt to resolve as many as possible of the alerts in all categories. Often the minor alerts point to easily fixed oversights, errors and omissions in your CIF or refinement strategy, so attention to these fine details can be worthwhile. In order to resolve some of the more serious problems it may be necessary to carry out additional measurements or structure refinements. However, the nature of your study may justify the reported deviations from journal submission requirements and the more serious of these should be commented upon in the discussion or experimental section of a paper or in the "special\_details" fields of the CIF. *checkCIF* was carefully designed to identify outliers and unusual parameters, but every test has its limitations and alerts that are not important in a particular case may appear. Conversely, the absence of alerts does not guarantee there are no aspects of the results needing attention. It is up to the individual to critically assess their own results and, if necessary, seek expert advice.

If level A alerts remain, which you believe to be justified deviations, and you intend to submit this CIF for publication in a journal, you should additionally insert an explanation in your CIF using the Validation Reply Form (VRF) below. This will allow your explanation to be considered as part of the review process.

### Validation response form

Please find below a validation response form (VRF) that can be filled in and pasted into your CIF.

```
# start Validation Reply Form
_vrf_PUBL006_GLOBAL
;
```

PROBLEM: \_publ\_requested\_journal is missing  
 RESPONSE: ...  
 ;  
 \_vrf\_PUBL008\_GLOBAL  
 ;  
 PROBLEM: \_publ\_section\_title is missing. Title of paper.  
 RESPONSE: ...  
 ;  
 \_vrf\_PUBL012\_GLOBAL  
 ;  
 PROBLEM: \_publ\_section\_abstract is missing.  
 RESPONSE: ...  
 ;  
 \_vrf\_PUBL024\_GLOBAL  
 ;  
 PROBLEM: The number of authors is greater than 9.  
 RESPONSE: ...  
 ;  
 # end Validation Reply Form

If you wish to submit your CIF for publication in Acta Crystallographica Section C or E, you should upload your CIF via [the web](#). If you wish to submit your CIF for publication in IUCrData you should upload your CIF via [the web](#). If your CIF is to form part of a submission to another IUCr journal, you will be asked, either during electronic [submission](#) or by the Co-editor handling your paper, to upload your CIF via our web site.

PLATON version of 19/10/2018; check.def file version of 15/10/2018

## Datablock I - ellipsoid plot

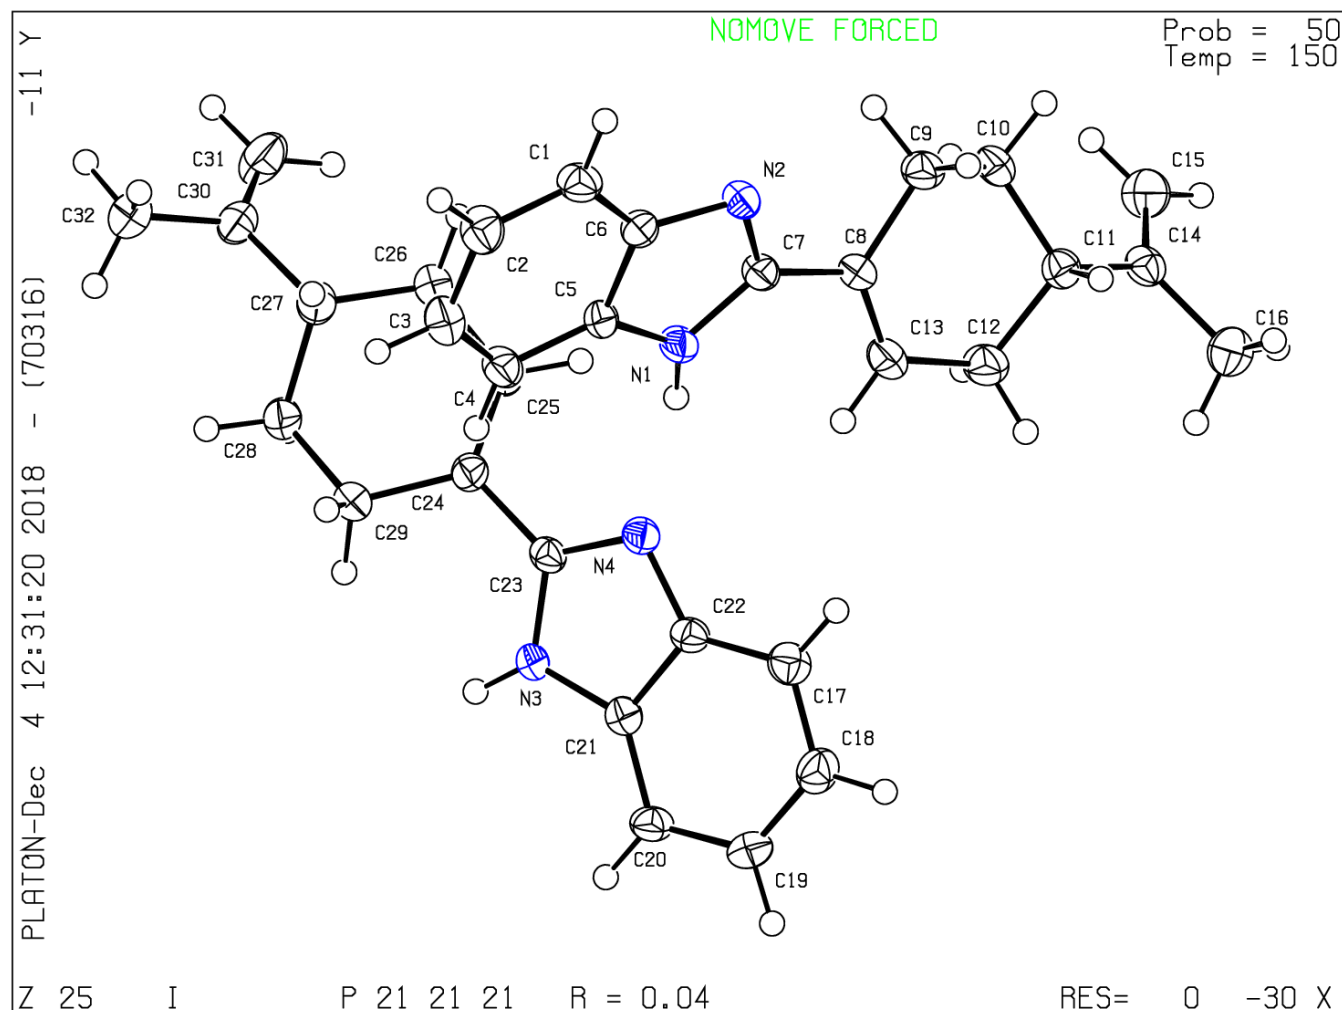

Supplement: s1 [file s1]
