# Supplementary material for: Hemi-Synthesis of Chiral Imine, Benzimidazole and Benzodiazepines from Essential Oil of Ammodaucus leucotrichus subsp. leucotrichus
Source: MDPI journal article supplement (doi:10.3390/molecules24050975), 2019-03-10
Supplement: s1 [file s1]

## checkCIF (full publication check) running

Checking for embedded fcf data in CIF ...

Found embedded fcf data in CIF. Extracting fcf data from uploaded CIF, please wait . . . .

## checkCIF/PLATON (full publication check)

Structure factors have been supplied for datablock(s) I

THIS REPORT IS FOR GUIDANCE ONLY. IF USED AS PART OF A REVIEW PROCEDURE FOR PUBLICATION, IT SHOULD NOT REPLACE THE EXPERTISE OF AN EXPERIENCED CRYSTALLOGRAPHIC REFEREE.

No syntax errors found.  
Please wait while processing ....

[CIF dictionary](#)  
[Interpreting this report](#)

[Structure factor report](#)

## Datablock: I

|                        |                                               |                                 |
|------------------------|-----------------------------------------------|---------------------------------|
| Bond precision:        | C-C = 0.0074 Å                                | Wavelength=0.71073              |
| Cell:                  | a=11.6925(14)    b=14.2324(16)    c=26.184(4) |                                 |
|                        | alpha=90    beta=92.664(4)    gamma=90        |                                 |
| Temperature: 150 K     |                                               |                                 |
|                        | Calculated                                    | Reported                        |
| Volume                 | 4352.6(10)                                    | 4352.7(10)                      |
| Space group            | I 2                                           | I 2                             |
| Hall group             | I 2y                                          | I 2y                            |
| Moiety formula         | C25 H32 N2 O                                  | C50 H64 N4 O2                   |
| Sum formula            | C25 H32 N2 O                                  | C50 H64 N4 O2                   |
| Mr                     | 376.53                                        | 753.05                          |
| Dx, g cm <sup>-3</sup> | 1.149                                         | 1.149                           |
| Z                      | 8                                             | 4                               |
| Mu (mm <sup>-1</sup> ) | 0.070                                         | 0.070                           |
| F000                   | 1632.0                                        | 1632.0                          |
| F000'                  | 1632.58                                       |                                 |
| h,k,lmax               | 14,17,31                                      | 14,17,31                        |
| Nref                   | 7963[ 4155]                                   | 7457                            |
| Tmin,Tmax              | 0.984,0.993                                   | 0.666,0.745                     |
| Tmin'                  | 0.984                                         |                                 |
| Correction method=     | # Reported T Limits: Tmin=0.666 Tmax=0.745    |                                 |
| AbsCorr =              | MULTI-SCAN                                    |                                 |
| Data completeness=     | 1.79/0.94                                     | Theta(max)= 25.348              |
| R(reflections)=        | 0.0650( 6717)                                 | wR2(reflections)= 0.1772( 7457) |
| S =                    | 1.047                                         | Npar= 501                       |

The following ALERTS were generated. Each ALERT has the format

**[test-name\\_ALERT\\_alert-type\\_alert-level](#)**.

Click on the hyperlinks for more details of the test.

### Alert level B

PLAT097\_ALERT\_2\_B Large Reported Max. (Positive) Residual Density    0.91 eA-3

PLAT111\_ALERT\_2\_B ADDSYM Detects New (Pseudo) Centre of Symmetry .    100 %Fit

**Author Response: This is an artifact because the structure needs to be non-centrosymmetric due to the use of a chiral natural product.**

PLAT201\_ALERT\_2\_B Isotropic non-H Atoms in Main Residue(s) .....    4 Report

**Author Response: This is alert arises due to the fact that the terminal methyl groups of the two crystallographically independent molecular units are strongly affected by thermal disorder**

which could not be modelled over, at least, two distinct crystallographic positions. These atoms were included in the final structural model with isotropic displacement parameters giving, in this fashion, rise to this Alert.

PLAT220\_ALERT\_2\_B Non-Solvent Resd 1 C Ueq(max)/Ueq(min) Range 8.5 Ratio

**Author Response:** This is alert arises due to the fact that the terminal methyl groups of the two crystallographically independent molecular units are strongly affected by thermal disorder which is translated into large Ueq. The disorder could not be modelled over, at least, two distinct crystallographic positions, hence the Alert.

PLAT220\_ALERT\_2\_B Non-Solvent Resd 2 C Ueq(max)/Ueq(min) Range 9.5 Ratio

**Author Response:** This is alert arises due to the fact that the terminal methyl groups of the two crystallographically independent molecular units are strongly affected by thermal disorder which is translated into large Ueq. The disorder could not be modelled over, at least, two distinct crystallographic positions, hence the Alert.

PLAT910\_ALERT\_3\_B Missing # of FCF Reflection(s) Below Theta(Min). 16 Note

## ●Alert level C

DIFMX02\_ALERT\_1\_C The maximum difference density is > 0.1\*ZMAX\*0.75

The relevant atom site should be identified.

STRVA01\_ALERT\_2\_C Chirality of atom sites is inverted?

From the CIF: \_refine\_ls\_abs\_structure\_Flack 0.900

From the CIF: \_refine\_ls\_abs\_structure\_Flack\_su 0.400

PLAT094\_ALERT\_2\_C Ratio of Maximum / Minimum Residual Density .... 2.15 Report

PLAT222\_ALERT\_3\_C Non-Solv. Resd 1 H Uiso(max)/Uiso(min) Range 9.5 Ratio

PLAT222\_ALERT\_3\_C Non-Solv. Resd 2 H Uiso(max)/Uiso(min) Range 8.9 Ratio

PLAT242\_ALERT\_2\_C Low 'MainMol' Ueq as Compared to Neighbors of C23 Check

PLAT242\_ALERT\_2\_C Low 'MainMol' Ueq as Compared to Neighbors of C48 Check

PLAT340\_ALERT\_3\_C Low Bond Precision on C-C Bonds ..... 0.00742 Ang.

PLAT907\_ALERT\_2\_C Flack x > 0.5, Structure Needs to be Inverted? . 0.90 Check

PLAT911\_ALERT\_3\_C Missing FCF Refl Between Thmin & STh/L= 0.600 3 Report

PLAT915\_ALERT\_3\_C No Flack x Check Done: Low Friedel Pair Coverage 87 %

## ●Alert level G

PLAT002\_ALERT\_2\_G Number of Distance or Angle Restraints on AtSite 8 Note

PLAT032\_ALERT\_4\_G Std. Uncertainty on Flack Parameter Value High . 0.400 Report

PLAT042\_ALERT\_1\_G Calc. and Reported MoietyFormula Strings Differ Please Check

PLAT045\_ALERT\_1\_G Calculated and Reported Z Differ by a Factor ... 2.00 Check

PLAT072\_ALERT\_2\_G SHELXL First Parameter in WGHT Unusually Large 0.10 Report

PLAT083\_ALERT\_2\_G SHELXL Second Parameter in WGHT Unusually Large 6.20 Why ?

PLAT112\_ALERT\_2\_G ADDSYM Detects New (Pseudo) Symm. Elem a 82 %Fit

PLAT113\_ALERT\_2\_G ADDSYM Suggests Possible Pseudo/New Space Group 12/c Check

PLAT172\_ALERT\_4\_G The CIF-Embedded .res File Contains DFIX Records 4 Report

PLAT380\_ALERT\_4\_G Incorrectly? Oriented X(sp2)-Methyl Moiety ..... C1 Check

PLAT380\_ALERT\_4\_G Incorrectly? Oriented X(sp2)-Methyl Moiety ..... C26 Check

PLAT791\_ALERT\_4\_G Model has Chirality at C8 (Chiral SPGR) S Verify

**And 3 other PLAT791 Alerts**

More ...

PLAT860\_ALERT\_3\_G Number of Least-Squares Restraints ..... 5 Note

PLAT912\_ALERT\_4\_G Missing # of FCF Reflections Above STh/L= 0.600 11 Note

PLAT913\_ALERT\_3\_G Missing # of Very Strong Reflections in FCF .... 1 Note

PLAT978\_ALERT\_2\_G Number C-C Bonds with Positive Residual Density. 12 Info

0 **ALERT level A** = Most likely a serious problem - resolve or explain

6 **ALERT level B** = A potentially serious problem, consider carefully

11 **ALERT level C** = Check. Ensure it is not caused by an omission or oversight

19 **ALERT level G** = General information/check it is not something unexpected

3 ALERT type 1 CIF construction/syntax error, inconsistent or missing data

16 ALERT type 2 Indicator that the structure model may be wrong or deficient

8 ALERT type 3 Indicator that the structure quality may be low

9 ALERT type 4 Improvement, methodology, query or suggestion

0 ALERT type 5 Informative message, check

## checkCIF publication errors

### ●Alert level A

PUBL006\_ALERT\_1\_A \_publ\_requested\_journal is missing

e.g. 'Acta Crystallographica Section C'

PUBL008\_ALERT\_1\_A \_publ\_section\_title is missing. Title of paper.

PUBL012\_ALERT\_1\_A \_publ\_section\_abstract is missing.

Abstract of paper in English.

PUBL024\_ALERT\_1\_A The number of authors is greater than 9.

Please specify the role of each of the co-authors  
for your paper.

---

## ● Alert level G

PUBL017\_ALERT\_1\_G The \_publ\_section\_references section is missing or empty.

---

4 **ALERT level A** = Data missing that is essential or data in wrong format

1 **ALERT level G** = General alerts. Data that may be required is missing

---

## Publication of your CIF

You should attempt to resolve as many as possible of the alerts in all categories. Often the minor alerts point to easily fixed oversights, errors and omissions in your CIF or refinement strategy, so attention to these fine details can be worthwhile. In order to resolve some of the more serious problems it may be necessary to carry out additional measurements or structure refinements. However, the nature of your study may justify the reported deviations from journal submission requirements and the more serious of these should be commented upon in the discussion or experimental section of a paper or in the "special\_details" fields of the CIF. *checkCIF* was carefully designed to identify outliers and unusual parameters, but every test has its limitations and alerts that are not important in a particular case may appear. Conversely, the absence of alerts does not guarantee there are no aspects of the results needing attention. It is up to the individual to critically assess their own results and, if necessary, seek expert advice.

If level A alerts remain, which you believe to be justified deviations, and you intend to submit this CIF for publication in a journal, you should additionally insert an explanation in your CIF using the Validation Reply Form (VRF) below. This will allow your explanation to be considered as part of the review process.

## Validation response form

Please find below a validation response form (VRF) that can be filled in and pasted into your CIF.

```
# start Validation Reply Form
_vrf_PUBL006_GLOBAL
;
PROBLEM: _publ_requested_journal is missing
RESPONSE: ...
;
_vrf_PUBL008_GLOBAL
;
PROBLEM: _publ_section_title is missing. Title of paper.
RESPONSE: ...
;
_vrf_PUBL012_GLOBAL
;
PROBLEM: _publ_section_abstract is missing.
RESPONSE: ...
;
_vrf_PUBL024_GLOBAL
;
PROBLEM: The number of authors is greater than 9.
RESPONSE: ...
;
# end Validation Reply Form
```

If you wish to submit your CIF for publication in Acta Crystallographica Section C or E, you should upload your CIF via [the web](#). If you wish to submit your CIF for publication in IUCrData you should upload your CIF via [the web](#). If your CIF is to form part of a submission to another IUCr journal, you will be asked, either during electronic [submission](#) or by the Co-editor handling your paper, to upload your CIF via our web site.

---

PLATON version of 19/10/2018; check.def file version of 15/10/2018

## Datablock I - ellipsoid plot

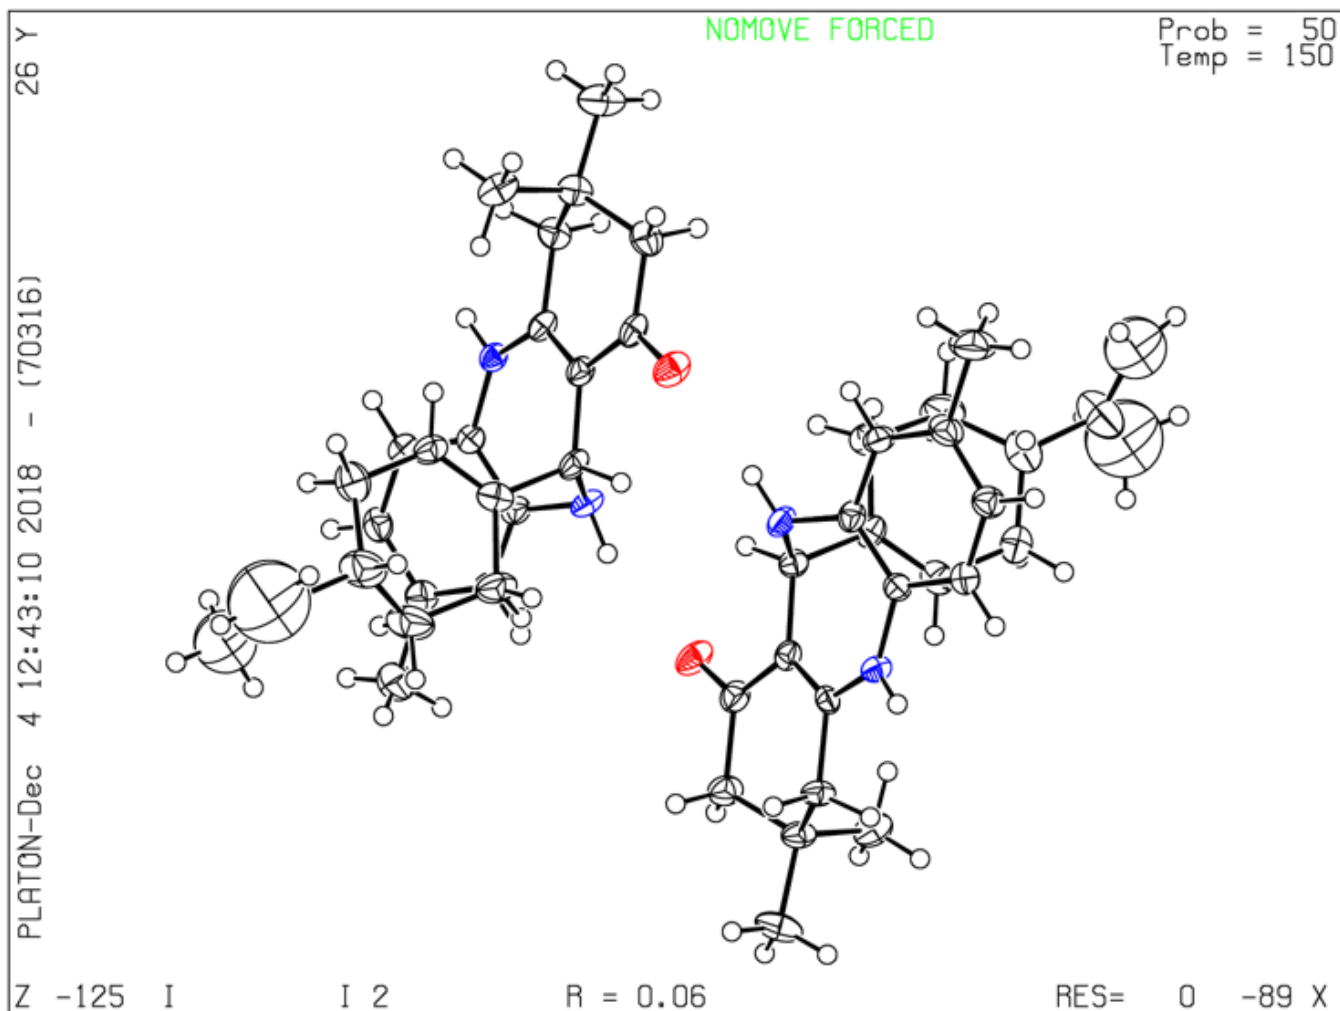

[Download CIF editor \(pubCIF\)](#) from the IUCr  
[Download CIF editor \(enCIFer\)](#) from the CCDC  
[Test a new CIF entry](#)
