# Supplementary material for: Hemi-Synthesis of Chiral Imine, Benzimidazole and Benzodiazepines from Essential Oil of Ammodaucus leucotrichus subsp. leucotrichus
Source: Molecules. 2019 Mar 10;24(5):975. doi: 10.3390/molecules24050975 (PMC6429316; doi:10.3390/molecules24050975)
Supplement: Supplementary file 1 [file molecules-24-00975-s001.zip]

Archive with 10 entries (10 files):
- 1.cif
- 1_checkCIF.pdf
- 2.cif
- 2_checkCIF.pdf
- 3.cif
- 3_checkCIF.pdf
- 4.cif
- 4_checkCIF.pdf
- CCDC Depository Request.pdf
- molecules-444652-supplementary.pdf
