# Supplementary material for: Hemi-Synthesis of Chiral Imine, Benzimidazole and Benzodiazepines from Essential Oil of Ammodaucus leucotrichus subsp. leucotrichus
Source: Molecules. 2019 Mar 10;24(5):975. doi: 10.3390/molecules24050975 (PMC6429316; doi:10.3390/molecules24050975)
Supplement: Supplementary file 1 [file molecules-24-00975-s001.zip › 1.cif]

 
data_1

#==============================================================================
# SUBMISSION DETAILS
#==============================================================================


_publ_contact_author_name         'Professor Artur Silva'
_publ_contact_author_address
; Department of Chemistry
  University of Aveiro
  CICECO
  3810-193
  Aveiro
  Portugal
;
_publ_contact_author_email        'artur.silva@ua.pt'
_publ_contact_author_fax          '+351 234 370084'
_publ_contact_author_phone        '+351 234 370714'

_journal_name_full                'SynLett'

loop_
_publ_author_name
_publ_author_address
_publ_author_footnote


 'Chebrouk, Farid'
;
  Laboratoire de Biomathematiques, Biophysique, Biochimie et Scientometrie 
  (L3BS)
  Faculte des Sciences de la Nature et de la Vie
  Universite de Bejaia
  06000 Bejaia
  Algeria
;
.

 'Khodir, Madani'
;
  Laboratoire de Biomathematiques, Biophysique, Biochimie et Scientometrie 
  (L3BS)
  Faculte des Sciences de la Nature et de la Vie
  Universite de Bejaia
  06000 Bejaia
  Algeria
;
.

 'Cherfaoui, Brahim'
;
  Centre de Recherche Scientifique et Technique en Analyses Physico-Chimiques
  BP 384, Bou-Ismail
  42004 Tipaza
  Algeria
;
.

 'Boukenna, Leila'
;
  Centre de Recherche Scientifique et Technique en Analyses Physico-Chimiques
  BP 384, Bou-Ismail
  42004 Tipaza
  Algeria
;
.

 'Valega, Monica'
;
  Department of Chemistry
  University of Aveiro
  QOPNA
  3810-193
  Aveiro
  Portugal
;
.

 'Talhi, Oualid'
;
  Centre de Recherche Scientifique et Technique en Analyses Physico-Chimiques
  BP 384, Bou-Ismail
  42004 Tipaza
  Algeria
  
  and
  
  Department of Chemistry
  University of Aveiro
  QOPNA
  3810-193
  Aveiro
  Portugal
;
.

 'Mendes, Ricardo F.' 
; 
  Department of Chemistry
  University of Aveiro
  CICECO - Aveiro Institute of Materials
  3810-193
  Aveiro
  Portugal
;
.

'Almeida Paz, Filipe A.' 
; 
  Department of Chemistry
  University of Aveiro
  CICECO - Aveiro Institute of Materials
  3810-193
  Aveiro
  Portugal
;
.

 'Bachari, Khaldoun'
;
  Centre de Recherche Scientifique et Technique en Analyses Physico-Chimiques
  BP 384, Bou-Ismail
  42004 Tipaza
  Algeria
;
.

 'Silva, Artur M. S.'
;
  Department of Chemistry
  University of Aveiro
  QOPNA
  3810-193
  Aveiro
  Portugal
;
.
 

#=============================================================================
_audit_creation_method            'SHELXL-2018/3, manual editing plus enCIFer'
_audit_creation_date              '04 December 2018'
_shelx_SHELXL_version_number      '2018/3'
#=============================================================================

_chemical_name_systematic         ?
_chemical_name_common             ?
_chemical_melting_point           ?
_chemical_formula_moiety          
 'C14 H16 N4' 
_chemical_formula_sum
 'C14 H16 N4' 
_chemical_formula_weight          240.31

loop_
 _atom_type_symbol
 _atom_type_description
 _atom_type_scat_dispersion_real
 _atom_type_scat_dispersion_imag
 _atom_type_scat_source
 'C'  'C'   0.0033   0.0016
 'International Tables Vol C Tables 4.2.6.8 and 6.1.1.4'
 'H'  'H'   0.0000   0.0000
 'International Tables Vol C Tables 4.2.6.8 and 6.1.1.4'
 'N'  'N'   0.0061   0.0033
 'International Tables Vol C Tables 4.2.6.8 and 6.1.1.4'


#=============================================================================
# CRYSTAL DATA
#=============================================================================

_space_group_crystal_system       monoclinic
_space_group_IT_number            4
_space_group_name_H-M_alt         'P 21'
_space_group_name_Hall            'P 2yb'
 
_shelx_space_group_comment
;
The symmetry employed for this shelxl refinement is uniquely defined
by the following loop, which should always be used as a source of
symmetry information in preference to the above space-group names.
They are only intended as comments.
;
 
loop_
 _space_group_symop_operation_xyz
 'x, y, z'
 '-x, y+1/2, -z'
 
_cell_length_a                    6.1702(13)
_cell_length_b                    7.1689(15)
_cell_length_c                    15.438(3)
_cell_angle_alpha                 90
_cell_angle_beta                  99.423(4)
_cell_angle_gamma                 90
_cell_volume                      673.7(2)
_cell_formula_units_Z             2
_cell_measurement_temperature     150(2)
_cell_measurement_reflns_used     3652
_cell_measurement_theta_min       2.67
_cell_measurement_theta_max       25.42
 
_exptl_crystal_description        Plate
_exptl_crystal_colour             Colourless
_exptl_crystal_density_meas       ?
_exptl_crystal_density_method     ?
_exptl_crystal_density_diffrn     1.185          
_exptl_crystal_F_000              256
_exptl_transmission_factor_min    0.5731
_exptl_transmission_factor_max    0.7452
_exptl_crystal_size_max           0.270
_exptl_crystal_size_mid           0.190
_exptl_crystal_size_min           0.090
_exptl_absorpt_coefficient_mu     0.074
_shelx_estimated_absorpt_T_min    0.980
_shelx_estimated_absorpt_T_max    0.993
_exptl_absorpt_correction_type    multi-scan
_exptl_absorpt_correction_T_min   ?
_exptl_absorpt_correction_T_max   ?
_exptl_absorpt_process_details    
; 
  SADABS-2016/2
  Reference: Krause, L., Herbst-Irmer, R., Sheldrick G.M. & Stalke D.,
  J. Appl. Cryst. 48 (2015) 3-10.
; 
 
#=============================================================================
# EXPERIMENTAL DATA
#============================================================================= 

_exptl_special_details
;
 ?
;
_diffrn_ambient_temperature       150(2)
_diffrn_radiation_wavelength      0.71073 
_diffrn_radiation_type            MoK\a 
_diffrn_radiation_source          'Sealed tube' 
_diffrn_radiation_monochromator   'Multi-layer X-ray mirror' 
_diffrn_measurement_device_type   'Bruker D8 QUEST '
_diffrn_measurement_method        '\w / \f scans'
_diffrn_detector_area_resol_mean  10.4167 
_diffrn_standards_number          0 
_diffrn_standards_interval_count  . 
_diffrn_standards_interval_time   . 
_diffrn_standards_decay_%         ?
_diffrn_reflns_number             4106
_diffrn_reflns_av_unetI/netI      0.0371
_diffrn_reflns_av_R_equivalents   0.0415
_diffrn_reflns_limit_h_min        -7
_diffrn_reflns_limit_h_max        7
_diffrn_reflns_limit_k_min        -7
_diffrn_reflns_limit_k_max        8
_diffrn_reflns_limit_l_min        -18
_diffrn_reflns_limit_l_max        18
_diffrn_reflns_theta_min          3.803
_diffrn_reflns_theta_max          25.340
_diffrn_reflns_theta_full         25.242
_diffrn_measured_fraction_theta_max   0.990
_diffrn_measured_fraction_theta_full  0.991
_diffrn_reflns_Laue_measured_fraction_max    0.990
_diffrn_reflns_Laue_measured_fraction_full   0.991
_diffrn_reflns_point_group_measured_fraction_max   0.921
_diffrn_reflns_point_group_measured_fraction_full  0.922
_reflns_number_total              2283
_reflns_number_gt                 2180
_reflns_threshold_expression      'I > 2\s(I)'
_reflns_Friedel_coverage          0.711
_reflns_Friedel_fraction_max      0.839
_reflns_Friedel_fraction_full     0.840
 
_reflns_special_details
;
 Reflections were merged by SHELXL according to the crystal
 class for the calculation of statistics and refinement.
 
 _reflns_Friedel_fraction is defined as the number of unique
 Friedel pairs measured divided by the number that would be
 possible theoretically, ignoring centric projections and
 systematic absences.
;
 
_computing_data_collection        'APEX3 2012.4 (Bruker, 2012b)'
_computing_cell_refinement        'SAINT V8.27b (Bruker, 2012a)'
_computing_data_reduction         'SAINT V8.27b (Bruker, 2012a)'
_computing_structure_solution     'SHELXT 2014/5 (Sheldrick, 2014)'
_computing_structure_refinement   'SHELXL-2018/3 (Sheldrick, 2017)'
_computing_molecular_graphics     'DIAMOND (Brandenburg, 1999)'  
_computing_publication_material   'SHELXL-2018/3 (Sheldrick, 2015)'


#=============================================================================
# REFINEMENT DATA
#=============================================================================

_refine_special_details           ?
_refine_ls_structure_factor_coef  Fsqd
_refine_ls_matrix_type            full
_refine_ls_weighting_scheme       calc
_refine_ls_weighting_details
'w=1/[\s^2^(Fo^2^)+(0.0503P)^2^+0.1005P] where P=(Fo^2^+2Fc^2^)/3'
_atom_sites_solution_primary      ?
_atom_sites_solution_secondary    ?
_atom_sites_solution_hydrogens    geom
_refine_ls_hydrogen_treatment     constr
_refine_ls_extinction_method      none
_refine_ls_extinction_coef        .
_refine_ls_abs_structure_details
;
 Flack x determined using 872 quotients [(I+)-(I-)]/[(I+)+(I-)]
 (Parsons, Flack and Wagner, Acta Cryst. B69 (2013) 249-259).
;
_refine_ls_abs_structure_Flack    0.1(10)
_chemical_absolute_configuration  rm
_refine_ls_number_reflns          2283
_refine_ls_number_parameters      163
_refine_ls_number_restraints      1
_refine_ls_R_factor_all           0.0389
_refine_ls_R_factor_gt            0.0363
_refine_ls_wR_factor_ref          0.0948
_refine_ls_wR_factor_gt           0.0911
_refine_ls_goodness_of_fit_ref    1.109
_refine_ls_restrained_S_all       1.108
_refine_ls_shift/su_max           0.000
_refine_ls_shift/su_mean          0.000

#=============================================================================
# ATOMIC COORDINATES AND DISPLACEMENT PARAMETERS
#=============================================================================

loop_
 _atom_site_label
 _atom_site_type_symbol
 _atom_site_fract_x
 _atom_site_fract_y
 _atom_site_fract_z
 _atom_site_U_iso_or_equiv
 _atom_site_adp_type
 _atom_site_occupancy
 _atom_site_site_symmetry_order  
 _atom_site_calc_flag
 _atom_site_refinement_flags_posn
 _atom_site_refinement_flags_adp
 _atom_site_refinement_flags_occupancy
 _atom_site_disorder_assembly
 _atom_site_disorder_group
N1 N 0.2552(3) 0.5393(3) 0.67363(11) 0.0238(4) Uani 1 1 d . . . . .
N2 N 0.1018(4) 1.0082(3) 0.63953(14) 0.0403(5) Uani 1 1 d . . . . .
N3 N -0.4312(3) 0.7506(4) 0.51044(15) 0.0407(5) Uani 1 1 d . . . . .
N4 N -0.1182(3) 0.3718(3) 0.58012(13) 0.0292(5) Uani 1 1 d . . . . .
H4A H -0.011619 0.299552 0.605959 0.035 Uiso 1 1 calc R U . . .
H4B H -0.238900 0.322016 0.550983 0.035 Uiso 1 1 calc R U . . .
C1 C 0.9842(3) 0.2970(3) 0.84518(14) 0.0233(5) Uani 1 1 d . . . . .
H1 H 1.019410 0.274554 0.785074 0.028 Uiso 1 1 calc R U . . .
C2 C 1.1575(4) 0.1962(3) 0.90925(15) 0.0267(5) Uani 1 1 d . . . . .
C3 C 1.1870(4) -0.0075(4) 0.89118(17) 0.0372(6) Uani 1 1 d . . . . .
H3A H 1.084431 -0.044194 0.838607 0.056 Uiso 0.5 1 calc R U P . .
H3B H 1.338053 -0.029797 0.881685 0.056 Uiso 0.5 1 calc R U P . .
H3C H 1.157752 -0.081193 0.941457 0.056 Uiso 0.5 1 calc R U P . .
H3D H 1.302393 -0.059262 0.935893 0.056 Uiso 0.5 1 calc R U P . .
H3E H 1.048771 -0.073659 0.892814 0.056 Uiso 0.5 1 calc R U P . .
H3F H 1.229072 -0.022263 0.833043 0.056 Uiso 0.5 1 calc R U P . .
C4 C 1.2810(4) 0.2775(4) 0.97827(15) 0.0335(6) Uani 1 1 d . . . . .
H4C H 1.387393 0.206441 1.015884 0.040 Uiso 1 1 calc R U . . .
H4D H 1.262358 0.406198 0.989668 0.040 Uiso 1 1 calc R U . . .
C5 C 0.7516(3) 0.2195(3) 0.84579(15) 0.0283(5) Uani 1 1 d . . . . .
H5A H 0.754171 0.081923 0.840406 0.034 Uiso 1 1 calc R U . . .
H5B H 0.704887 0.250423 0.902460 0.034 Uiso 1 1 calc R U . . .
C6 C 0.5859(3) 0.3001(3) 0.77067(15) 0.0264(5) Uani 1 1 d . . . . .
H6A H 0.608815 0.241952 0.714694 0.032 Uiso 1 1 calc R U . . .
H6B H 0.435248 0.269295 0.780238 0.032 Uiso 1 1 calc R U . . .
C7 C 0.6084(4) 0.5091(3) 0.76398(14) 0.0246(5) Uani 1 1 d . . . . .
C8 C 0.7877(3) 0.6001(4) 0.80362(15) 0.0278(5) Uani 1 1 d . . . . .
H8 H 0.792011 0.731604 0.796510 0.033 Uiso 1 1 calc R U . . .
C9 C 0.9821(3) 0.5081(3) 0.85845(14) 0.0270(5) Uani 1 1 d . . . . .
H9A H 0.979846 0.535190 0.921171 0.032 Uiso 1 1 calc R U . . .
H9B H 1.118750 0.561841 0.843132 0.032 Uiso 1 1 calc R U . . .
C10 C 0.4310(3) 0.6170(3) 0.71382(14) 0.0254(5) Uani 1 1 d . . . . .
H10 H 0.445618 0.748681 0.710705 0.030 Uiso 1 1 calc R U . . .
C11 C 0.0845(3) 0.6482(3) 0.62894(14) 0.0245(5) Uani 1 1 d . . . . .
C12 C -0.0969(3) 0.5576(3) 0.58515(14) 0.0246(5) Uani 1 1 d . . . . .
C13 C -0.2815(4) 0.6664(3) 0.54268(15) 0.0288(5) Uani 1 1 d . . . . .
C14 C 0.0900(3) 0.8475(4) 0.63285(14) 0.0283(5) Uani 1 1 d . . . . .
 
loop_
 _atom_site_aniso_label
 _atom_site_aniso_U_11
 _atom_site_aniso_U_22
 _atom_site_aniso_U_33
 _atom_site_aniso_U_23
 _atom_site_aniso_U_13
 _atom_site_aniso_U_12
N1 0.0240(9) 0.0233(10) 0.0231(9) 0.0016(7) 0.0006(7) 0.0003(8)
N2 0.0487(14) 0.0264(13) 0.0415(12) -0.0005(10) -0.0054(10) 0.0042(10)
N3 0.0325(11) 0.0383(13) 0.0478(12) 0.0037(11) -0.0033(9) 0.0088(10)
N4 0.0272(9) 0.0233(11) 0.0331(10) 0.0021(8) -0.0068(7) -0.0001(8)
C1 0.0198(10) 0.0252(13) 0.0240(10) -0.0011(8) 0.0011(8) -0.0018(8)
C2 0.0201(10) 0.0321(13) 0.0275(11) 0.0033(9) 0.0025(8) -0.0007(9)
C3 0.0318(12) 0.0318(14) 0.0440(13) 0.0025(12) -0.0054(10) 0.0063(11)
C4 0.0255(11) 0.0379(15) 0.0341(12) 0.0002(11) -0.0039(9) 0.0003(10)
C5 0.0212(10) 0.0279(13) 0.0343(12) 0.0069(10) -0.0001(8) -0.0018(9)
C6 0.0209(10) 0.0237(13) 0.0333(12) 0.0033(9) 0.0005(8) -0.0023(8)
C7 0.0240(11) 0.0254(12) 0.0246(10) 0.0004(9) 0.0043(8) 0.0002(9)
C8 0.0270(11) 0.0230(12) 0.0327(12) -0.0012(10) 0.0034(9) -0.0012(10)
C9 0.0221(11) 0.0270(13) 0.0306(11) -0.0033(10) 0.0004(9) -0.0024(10)
C10 0.0275(11) 0.0228(12) 0.0256(10) 0.0011(9) 0.0039(9) -0.0016(10)
C11 0.0275(11) 0.0210(12) 0.0249(10) 0.0031(9) 0.0036(9) 0.0014(9)
C12 0.0247(11) 0.0253(14) 0.0232(10) 0.0027(9) 0.0021(8) 0.0019(9)
C13 0.0283(12) 0.0264(13) 0.0302(11) 0.0007(10) 0.0004(9) 0.0001(10)
C14 0.0292(11) 0.0265(14) 0.0269(10) -0.0002(10) -0.0017(9) 0.0015(10)
 
_geom_special_details
;
 All esds (except the esd in the dihedral angle between two l.s. planes)
 are estimated using the full covariance matrix.  The cell esds are taken
 into account individually in the estimation of esds in distances, angles
 and torsion angles; correlations between esds in cell parameters are only
 used when they are defined by crystal symmetry.  An approximate (isotropic)
 treatment of cell esds is used for estimating esds involving l.s. planes.
;
 
loop_
 _geom_bond_atom_site_label_1
 _geom_bond_atom_site_label_2
 _geom_bond_distance
 _geom_bond_site_symmetry_2
 _geom_bond_publ_flag
N1 C10 1.285(3) . ?
N1 C11 1.399(3) . ?
N2 C14 1.158(4) . ?
N3 C13 1.146(3) . ?
N4 C12 1.339(3) . ?
N4 H4A 0.8800 . ?
N4 H4B 0.8800 . ?
C1 C2 1.516(3) . ?
C1 C9 1.528(3) . ?
C1 C5 1.541(3) . ?
C1 H1 1.0000 . ?
C2 C4 1.338(3) . ?
C2 C3 1.503(4) . ?
C3 H3A 0.9800 . ?
C3 H3B 0.9800 . ?
C3 H3C 0.9800 . ?
C3 H3D 0.9800 . ?
C3 H3E 0.9800 . ?
C3 H3F 0.9800 . ?
C4 H4C 0.9500 . ?
C4 H4D 0.9500 . ?
C5 C6 1.528(3) . ?
C5 H5A 0.9900 . ?
C5 H5B 0.9900 . ?
C6 C7 1.510(3) . ?
C6 H6A 0.9900 . ?
C6 H6B 0.9900 . ?
C7 C8 1.343(3) . ?
C7 C10 1.456(3) . ?
C8 C9 1.502(3) . ?
C8 H8 0.9500 . ?
C9 H9A 0.9900 . ?
C9 H9B 0.9900 . ?
C10 H10 0.9500 . ?
C11 C12 1.372(3) . ?
C11 C14 1.430(3) . ?
C12 C13 1.446(3) . ?
 
loop_
 _geom_angle_atom_site_label_1
 _geom_angle_atom_site_label_2
 _geom_angle_atom_site_label_3
 _geom_angle
 _geom_angle_site_symmetry_1
 _geom_angle_site_symmetry_3
 _geom_angle_publ_flag
C10 N1 C11 120.26(19) . . ?
C12 N4 H4A 120.0 . . ?
C12 N4 H4B 120.0 . . ?
H4A N4 H4B 120.0 . . ?
C2 C1 C9 113.91(19) . . ?
C2 C1 C5 112.49(18) . . ?
C9 C1 C5 109.16(18) . . ?
C2 C1 H1 107.0 . . ?
C9 C1 H1 107.0 . . ?
C5 C1 H1 107.0 . . ?
C4 C2 C3 120.0(2) . . ?
C4 C2 C1 124.1(2) . . ?
C3 C2 C1 115.83(19) . . ?
C2 C3 H3A 109.5 . . ?
C2 C3 H3B 109.5 . . ?
H3A C3 H3B 109.5 . . ?
C2 C3 H3C 109.5 . . ?
H3A C3 H3C 109.5 . . ?
H3B C3 H3C 109.5 . . ?
H3D C3 H3E 109.5 . . ?
H3D C3 H3F 109.5 . . ?
H3E C3 H3F 109.5 . . ?
C2 C4 H4C 120.0 . . ?
C2 C4 H4D 120.0 . . ?
H4C C4 H4D 120.0 . . ?
C6 C5 C1 111.53(19) . . ?
C6 C5 H5A 109.3 . . ?
C1 C5 H5A 109.3 . . ?
C6 C5 H5B 109.3 . . ?
C1 C5 H5B 109.3 . . ?
H5A C5 H5B 108.0 . . ?
C7 C6 C5 111.70(19) . . ?
C7 C6 H6A 109.3 . . ?
C5 C6 H6A 109.3 . . ?
C7 C6 H6B 109.3 . . ?
C5 C6 H6B 109.3 . . ?
H6A C6 H6B 107.9 . . ?
C8 C7 C10 118.4(2) . . ?
C8 C7 C6 121.9(2) . . ?
C10 C7 C6 119.7(2) . . ?
C7 C8 C9 124.5(2) . . ?
C7 C8 H8 117.8 . . ?
C9 C8 H8 117.8 . . ?
C8 C9 C1 112.51(19) . . ?
C8 C9 H9A 109.1 . . ?
C1 C9 H9A 109.1 . . ?
C8 C9 H9B 109.1 . . ?
C1 C9 H9B 109.1 . . ?
H9A C9 H9B 107.8 . . ?
N1 C10 C7 121.9(2) . . ?
N1 C10 H10 119.1 . . ?
C7 C10 H10 119.1 . . ?
C12 C11 N1 117.79(19) . . ?
C12 C11 C14 120.4(2) . . ?
N1 C11 C14 121.7(2) . . ?
N4 C12 C11 124.3(2) . . ?
N4 C12 C13 116.6(2) . . ?
C11 C12 C13 119.1(2) . . ?
N3 C13 C12 178.2(3) . . ?
N2 C14 C11 176.8(3) . . ?
 
loop_
 _geom_torsion_atom_site_label_1
 _geom_torsion_atom_site_label_2
 _geom_torsion_atom_site_label_3
 _geom_torsion_atom_site_label_4
 _geom_torsion
 _geom_torsion_site_symmetry_1
 _geom_torsion_site_symmetry_2
 _geom_torsion_site_symmetry_3
 _geom_torsion_site_symmetry_4
 _geom_torsion_publ_flag
C9 C1 C2 C4 7.9(3) . . . . ?
C5 C1 C2 C4 -117.0(3) . . . . ?
C9 C1 C2 C3 -171.9(2) . . . . ?
C5 C1 C2 C3 63.2(3) . . . . ?
C2 C1 C5 C6 -170.5(2) . . . . ?
C9 C1 C5 C6 62.0(2) . . . . ?
C1 C5 C6 C7 -47.0(3) . . . . ?
C5 C6 C7 C8 16.4(3) . . . . ?
C5 C6 C7 C10 -163.20(19) . . . . ?
C10 C7 C8 C9 179.2(2) . . . . ?
C6 C7 C8 C9 -0.4(4) . . . . ?
C7 C8 C9 C1 15.3(3) . . . . ?
C2 C1 C9 C8 -171.15(18) . . . . ?
C5 C1 C9 C8 -44.5(2) . . . . ?
C11 N1 C10 C7 177.46(19) . . . . ?
C8 C7 C10 N1 179.5(2) . . . . ?
C6 C7 C10 N1 -0.9(3) . . . . ?
C10 N1 C11 C12 178.24(19) . . . . ?
C10 N1 C11 C14 -5.8(3) . . . . ?
N1 C11 C12 N4 -2.2(3) . . . . ?
C14 C11 C12 N4 -178.2(2) . . . . ?
N1 C11 C12 C13 176.39(19) . . . . ?
C14 C11 C12 C13 0.3(3) . . . . ?
 
loop_
 _geom_hbond_atom_site_label_D 
 _geom_hbond_atom_site_label_H 
 _geom_hbond_atom_site_label_A 
 _geom_hbond_distance_DH 
 _geom_hbond_distance_HA 
 _geom_hbond_distance_DA 
 _geom_hbond_angle_DHA 
 _geom_hbond_site_symmetry_A 
 _geom_hbond_publ_flag
N4 H4A N2  0.88 2.24 3.012(3) 147 1_545 yes
N4 H4B N3  0.88 2.16 3.028(3) 168 2_446 yes
 
_refine_diff_density_max    0.239
_refine_diff_density_min   -0.187
_refine_diff_density_rms    0.052

_shelx_res_file
;

TITL FPD8_17_036 in P2(1)
    FPD8_17_036.res
    created by SHELXL-2017/1 at 14:32:25 on 30-Nov-2017
CELL  0.71073   6.1702   7.1689  15.4385   90.000   99.423   90.000
ZERR    2.000   0.0013   0.0015   0.0032    0.000    0.004    0.000
LATT -1
SYMM -X, 1/2+Y, -Z

SFAC C  H  N
UNIT 28 32 8

LIST 4 ! automatically inserted. Change 6 to 4 for CHECKCIF!!

L.S. 18

ACTA
BOND $H
CONF
WPDB

SHEL 5.8 0.83
SIZE 0.27 0.19 0.09
REM Colourless Plate

TEMP -123.140

FMAP 2
PLAN -5

EQIV $1 x, y-1, z
EQIV $2 -x-1, y-1/2, -z+1
HTAB N4 N2_$1
HTAB N4 N3_$2
HTAB

WGHT    0.050300    0.100500
FVAR       1.59700
N1    3    0.255201    0.539284    0.673626    11.00000    0.02399    0.02327 =
         0.02313    0.00163    0.00064    0.00029
N2    3    0.101795    1.008158    0.639533    11.00000    0.04869    0.02643 =
         0.04153   -0.00054   -0.00536    0.00424
N3    3   -0.431206    0.750559    0.510440    11.00000    0.03248    0.03834 =
         0.04784    0.00367   -0.00327    0.00876
N4    3   -0.118246    0.371816    0.580123    11.00000    0.02723    0.02331 =
         0.03307    0.00214   -0.00683   -0.00009
AFIX  93
H4A   2   -0.011619    0.299552    0.605959    11.00000   -1.20000
H4B   2   -0.238900    0.322016    0.550983    11.00000   -1.20000
AFIX   0
C1    1    0.984225    0.296997    0.845178    11.00000    0.01979    0.02523 =
         0.02398   -0.00110    0.00111   -0.00182
AFIX  13
H1    2    1.019410    0.274554    0.785074    11.00000   -1.20000
AFIX   0
C2    1    1.157536    0.196231    0.909247    11.00000    0.02007    0.03209 =
         0.02745    0.00327    0.00255   -0.00069
C3    1    1.187008   -0.007465    0.891177    11.00000    0.03183    0.03178 =
         0.04399    0.00247   -0.00540    0.00635
AFIX 123
H3A   2    1.084431   -0.044194    0.838607    10.50000   -1.50000
H3B   2    1.338053   -0.029797    0.881685    10.50000   -1.50000
H3C   2    1.157752   -0.081193    0.941457    10.50000   -1.50000
H3D   2    1.302393   -0.059262    0.935893    10.50000   -1.50000
H3E   2    1.048771   -0.073659    0.892814    10.50000   -1.50000
H3F   2    1.229072   -0.022263    0.833043    10.50000   -1.50000
AFIX   0
C4    1    1.281025    0.277471    0.978267    11.00000    0.02550    0.03788 =
         0.03410    0.00016   -0.00388    0.00033
AFIX  93
H4C   2    1.387393    0.206441    1.015884    11.00000   -1.20000
H4D   2    1.262358    0.406198    0.989668    11.00000   -1.20000
AFIX   0
C5    1    0.751574    0.219483    0.845792    11.00000    0.02121    0.02788 =
         0.03434    0.00695   -0.00007   -0.00177
AFIX  23
H5A   2    0.754171    0.081923    0.840406    11.00000   -1.20000
H5B   2    0.704887    0.250423    0.902460    11.00000   -1.20000
AFIX   0
C6    1    0.585945    0.300068    0.770665    11.00000    0.02088    0.02371 =
         0.03328    0.00328    0.00047   -0.00227
AFIX  23
H6A   2    0.608815    0.241952    0.714694    11.00000   -1.20000
H6B   2    0.435248    0.269295    0.780238    11.00000   -1.20000
AFIX   0
C7    1    0.608373    0.509076    0.763978    11.00000    0.02396    0.02540 =
         0.02462    0.00041    0.00433    0.00021
C8    1    0.787741    0.600095    0.803619    11.00000    0.02700    0.02304 =
         0.03273   -0.00119    0.00336   -0.00120
AFIX  43
H8    2    0.792011    0.731604    0.796510    11.00000   -1.20000
AFIX   0
C9    1    0.982128    0.508119    0.858446    11.00000    0.02214    0.02697 =
         0.03062   -0.00325    0.00037   -0.00235
AFIX  23
H9A   2    0.979846    0.535190    0.921171    11.00000   -1.20000
H9B   2    1.118750    0.561841    0.843132    11.00000   -1.20000
AFIX   0
C10   1    0.431017    0.617037    0.713821    11.00000    0.02754    0.02277 =
         0.02564    0.00112    0.00392   -0.00158
AFIX  43
H10   2    0.445618    0.748681    0.710705    11.00000   -1.20000
AFIX   0
C11   1    0.084462    0.648207    0.628942    11.00000    0.02748    0.02097 =
         0.02487    0.00310    0.00356    0.00143
C12   1   -0.096896    0.557615    0.585152    11.00000    0.02465    0.02534 =
         0.02323    0.00267    0.00207    0.00194
C13   1   -0.281540    0.666361    0.542677    11.00000    0.02831    0.02640 =
         0.03018    0.00066    0.00043    0.00007
C14   1    0.089994    0.847490    0.632854    11.00000    0.02922    0.02654 =
         0.02692   -0.00024   -0.00172    0.00151
HKLF 4


REM  FPD8_17_036 in P2(1)
REM R1 =  0.0363 for    2180 Fo > 4sig(Fo)  and  0.0389 for all    2283 data
REM    163 parameters refined using      1 restraints

END

WGHT      0.0503      0.1005

REM Instructions for potential hydrogen bonds
HTAB N4 N2_$1
HTAB N4 N3_$2

REM Highest difference peak  0.239,  deepest hole -0.187,  1-sigma level  0.052
Q1    1   1.1799 -0.0087  0.8264  11.00000  0.05    0.24
Q2    1   0.0015  0.6008  0.5874  11.00000  0.05    0.23
Q3    1   0.0661  0.7270  0.6385  11.00000  0.05    0.22
Q4    1   0.8841  0.2677  0.8524  11.00000  0.05    0.21
Q5    1   0.6086  0.4078  0.7608  11.00000  0.05    0.20
;
_shelx_res_checksum   16168

_shelx_hkl_file
;
  -1   0   0 5624.04  203.48
  -1   0   0 5815.22  203.38
   1   0   0 5414.26  203.48
   1   0   0 5733.63  203.38
  -2   0   0   17.70    1.00
  -2   0   0   17.40    1.20
   2   0   0   18.40    1.10
   2   0   0   17.30    1.20
  -3   0   0   35.50    2.00
   3   0   0   37.10    2.00
  -4   0   0    0.60    1.00
   4   0   0    0.20    0.90
  -5   0   0   17.90    2.20
  -6   0   0  554.04   20.70
   6   0   0  564.34   20.60
  -7   0   0  149.19    6.30
   7   0   0  152.98    6.20
   7  -1   0   59.49    3.40
  -7   1   0   60.59    3.40
   6  -1   0   51.59    3.00
  -6   1   0   55.29    3.20
   5  -1   0  148.99    6.00
  -5   1   0  148.09    6.00
   4  -1   0   65.09    2.90
  -4   1   0   65.39    3.00
   3  -1   0 1682.53   60.99
  -3   1   0 1698.43   60.99
   2  -1   0 2011.10   71.39
   2  -1   0 2030.50   71.39
  -2   1   0 1978.00   71.39
  -2   1   0 1904.91   71.39
   1  -1   0 2948.10  107.19
   1  -1   0 2969.30  107.29
  -1   1   0 3125.89  107.29
  -1   1   0 2861.51  107.19
   0   1   0    0.60    0.30
   0   1   0    0.70    0.30
  -1  -1   0 3843.92  155.18
  -1  -1   0 4419.36  155.38
  -1  -1   0 4401.46  155.18
   1   1   0 4214.78  155.18
   1   1   0 4439.26  155.18
   1   1   0 4521.35  155.38
  -2  -1   0 2160.28   76.09
  -2  -1   0 2075.09   76.09
  -2  -1   0 1973.00   76.09
   2   1   0 2347.07   76.29
   2   1   0 2011.10   76.09
  -3  -1   0 1675.23   60.49
  -3  -1   0 1701.33   60.59
   3   1   0 1659.43   60.59
  -4  -1   0   63.89    2.90
   4   1   0   62.99    2.70
  -5  -1   0  140.29    5.70
   5   1   0  141.09    5.60
  -6  -1   0   55.39    3.10
   6   1   0   52.09    3.00
  -7  -1   0   60.19    3.40
   7   1   0   63.69    3.30
   7  -2   0  103.99    4.60
  -7   2   0  100.79    4.60
   6  -2   0   40.40    2.80
  -6   2   0   43.50    2.80
   5  -2   0    4.00    1.50
  -5   2   0    4.30    1.40
   4  -2   0  135.09    5.40
  -4   2   0  138.79    5.50
   3  -2   0   95.69    3.90
  -3   2   0   95.59    3.90
   2  -2   0  496.25   18.70
   2  -2   0  536.35   18.80
  -2   2   0  514.65   18.80
   1  -2   0 1409.26   49.30
   1  -2   0 1407.16   49.30
  -1   2   0 1309.47   49.40
  -1   2   0 1342.67   49.30
   0   2   0 1037.80   37.20
   0   2   0 1026.70   37.30
   0   2   0 1034.50   37.20
  -1  -2   0 1389.26   48.60
   1   2   0 1339.77   48.50
   1   2   0 1314.57   48.60
  -2  -2   0  543.65   18.90
  -2  -2   0  513.75   18.90
   2   2   0  508.95   18.90
   2   2   0  531.65   19.00
   2   2   0  511.55   18.90
  -3  -2   0   99.29    3.80
  -3  -2   0   93.69    3.70
   3   2   0   93.39    3.70
  -4  -2   0  133.99    5.20
   4   2   0  129.99    5.10
  -5  -2   0    2.00    1.20
   5   2   0    2.00    1.00
  -6  -2   0   43.00    2.60
  -7  -2   0  100.69    4.50
   7   2   0  103.09    4.50
   6  -3   0  174.78    7.00
  -6   3   0  169.78    7.00
   5  -3   0    1.00    1.40
   4  -3   0   12.80    1.90
  -4   3   0   13.10    1.80
   3  -3   0  259.67    9.60
  -3   3   0  250.77    9.50
   2  -3   0   14.70    1.30
   2  -3   0   15.00    1.70
  -2   3   0   13.90    1.50
   1  -3   0  180.88    6.50
   1  -3   0  188.88    6.60
  -1   3   0  166.08    6.60
  -1   3   0  171.78    6.60
   0   3   0    0.20    0.60
   0   3   0   -0.50    0.60
   1   3   0  176.68    6.30
   1   3   0  161.98    6.30
   2   3   0   10.90    1.20
   2   3   0   13.90    1.50
  -3  -3   0  253.67    9.20
  -3  -3   0  249.38    9.10
   3   3   0  244.18    9.20
  -4  -3   0   13.20    1.50
  -4  -3   0   12.90    0.90
   4   3   0   12.10    1.30
  -5  -3   0    2.30    1.10
   5   3   0    2.00    1.00
  -6  -3   0  168.48    6.60
   6  -4   0   56.29    3.50
  -6   4   0   59.29    3.20
   5  -4   0  180.68    7.20
  -5   4   0  177.88    7.10
   4  -4   0   92.49    4.20
  -4   4   0   93.19    4.10
   3  -4   0  163.58    6.40
  -3   4   0  164.18    6.40
   2  -4   0  188.58    6.80
   2  -4   0  171.58    6.70
   1  -4   0   99.19    3.70
   1  -4   0  106.19    3.90
  -1   4   0   93.79    3.80
  -1   4   0   93.29    4.00
   0   4   0 1597.64   55.69
   0   4   0 1572.54   55.89
   0   4   0 1465.85   55.79
   1   4   0   89.79    3.70
   1   4   0  100.89    4.00
   1   4   0   98.79    3.70
   2   4   0  178.28    6.70
   2   4   0  186.38    6.90
   3   4   0  160.98    6.20
   3   4   0  167.28    6.40
  -4  -4   0   94.09    3.60
   4   4   0   89.69    3.70
  -5  -4   0  178.78    6.60
   5   4   0  172.58    6.70
   5  -5   0    0.00    1.50
  -5   5   0    4.30    1.30
   4  -5   0   48.20    4.10
  -4   5   0   50.99    2.80
   3  -5   0 1555.74   54.99
  -3   5   0 1481.05   54.89
   2  -5   0  178.38    6.60
   2  -5   0  166.88    6.50
  -2   5   0  175.98    6.60
  -1   5   0   70.89    3.30
  -1   5   0   70.89    2.90
   0   5   0    0.10    0.90
   1   5   0   73.69    3.30
   1   5   0   71.69    2.90
   2   5   0  180.48    6.80
   2   5   0  166.48    6.40
   3   5   0 1446.16   54.59
   3   5   0 1578.44   54.79
   5  -6   0   94.79    4.60
  -5   6   0  108.59    4.50
   4  -6   0   46.00    2.70
  -4   6   0   48.40    2.60
   3  -6   0   72.99    3.20
  -3   6   0   67.99    3.20
  -2   6   0  112.19    5.00
  -2   6   0  116.49    4.50
  -1   6   0  320.77   12.30
  -1   6   0  347.37   12.60
   0   6   0  207.78    8.10
   1   6   0  338.27   12.40
   1   6   0  319.77   12.10
   2   6   0  116.09    5.20
   3   6   0   74.49    3.70
  -4   7   0   21.90    2.30
  -3   7   0   77.79    4.00
  -2   7   0    6.20    1.70
  -1   7   0  110.09    4.90
   0   7   0    1.70    1.50
   1   7   0   99.99    4.50
   2   7   0    6.40    1.50
   3   7   0   73.79    3.70
  -2   8   0   21.90    2.60
  -1   8   0   -0.50    1.60
   0   8   0  136.99    5.90
   1   8   0   -0.80    1.50
   2   8   0   25.50    2.60
   2   8  -1   36.50    2.90
   1   8  -1   19.30    2.40
   0   8  -1   30.60    2.80
  -1   8  -1   17.00    2.50
  -2   8  -1  121.49    5.50
   4   7  -1    9.50    2.10
   3   7  -1   36.90    2.80
   2   7  -1    1.20    1.50
   1   7  -1   62.29    3.50
   0   7  -1    2.30    1.60
  -1   7  -1    7.90    1.60
  -2   7  -1   62.89    3.60
  -3   7  -1   25.20    2.60
   4   6  -1    7.20    1.30
   3   6  -1   22.40    2.30
   2   6  -1   56.89    3.40
   1   6  -1  198.98    7.50
   1   6  -1  206.28    7.90
   0   6  -1  106.99    4.20
   0   6  -1  112.29    4.80
  -1   6  -1   43.50    2.20
  -2   6  -1  612.74   22.70
  -2   6  -1  612.34   22.90
   2  -6   1  638.44   22.70
  -3   6  -1   54.69    2.80
   3  -6   1   54.29    2.90
   4  -6   1   -0.80    1.40
  -5   6  -1  135.39    5.50
   5  -6   1  122.69    5.60
   4   5  -1   70.39    3.00
   4   5  -1   72.39    3.40
   3   5  -1  588.24   21.60
   2   5  -1  115.29    4.50
   2   5  -1  116.89    4.80
   1   5  -1   68.89    3.20
   1   5  -1   68.99    2.80
   0   5  -1   18.20    1.80
  -1   5  -1   75.99    3.60
  -1   5  -1   76.29    3.20
   1  -5   1   75.79    3.00
   1  -5   1   82.19    3.30
  -2   5  -1  789.02   29.50
   2  -5   1  786.12   29.50
   2  -5   1  865.21   29.60
  -3   5  -1 1185.58   44.10
   3  -5   1 1245.88   44.10
  -4   5  -1   15.80    2.00
   4  -5   1   11.00    2.00
  -5   5  -1    6.90    1.40
   5  -5   1    6.60    1.60
  -6  -4   1   50.59    2.40
   5   4  -1    9.20    1.40
  -5  -4   1   12.00    1.40
   4   4  -1   31.90    1.80
  -4  -4   1   32.20    1.80
   3   4  -1 1131.19   40.10
   3   4  -1 1048.20   40.00
  -3  -4   1 1092.99   39.90
  -3  -4   1 1147.79   39.90
   2   4  -1  568.14   20.90
   2   4  -1  585.34   21.10
   1   4  -1  281.37   10.10
   1   4  -1  271.27   10.30
   0   4  -1  727.33   26.50
  -1   4  -1  601.84   22.30
   1  -4   1  629.44   22.20
   1  -4   1  609.14   22.40
  -2   4  -1  129.89    5.10
   2  -4   1  128.09    5.00
   2  -4   1  139.59    5.20
  -3   4  -1  189.88    7.50
   3  -4   1  203.68    7.60
  -4   4  -1  198.18    7.90
   4  -4   1  208.88    8.00
  -5   4  -1  118.39    5.00
   5  -4   1  111.49    5.10
  -6   4  -1   11.10    2.20
  -6  -3   1   88.49    3.90
   5   3  -1   30.50    2.10
  -5  -3   1   35.20    2.30
   4   3  -1  216.88    8.20
  -4  -3   1  223.88    8.30
   3   3  -1  662.93   24.60
   3   3  -1  698.83   24.70
  -3  -3   1  681.23   24.60
  -3  -3   1  675.23   24.60
   2   3  -1   25.10    1.50
   2   3  -1   24.80    1.80
  -2  -3   1   27.40    1.60
  -2  -3   1   25.60    1.40
   1   3  -1  532.75   20.50
   1   3  -1  572.54   20.50
   1   3  -1  549.25   20.70
  -1  -3   1  592.14   20.50
  -1  -3   1  586.64   20.50
   0   3  -1 3215.38  120.09
   0   3  -1 3347.57  120.09
   0  -3   1 3445.26  120.09
  -1   3  -1  294.47   11.60
   1  -3   1  319.97   11.60
   1  -3   1  336.17   11.70
   2  -3   1  330.47   11.70
   2  -3   1  305.47   11.70
  -3   3  -1  159.28    6.30
   3  -3   1  168.98    6.40
  -4   3  -1   64.69    3.10
   4  -3   1   64.19    3.20
   5  -3   1  247.78    9.60
  -6   3  -1   44.40    2.80
   6  -3   1   38.00    2.90
   7   2  -1    0.50    1.30
  -7  -2   1    4.90    1.40
  -6  -2   1  106.79    4.60
   5   2  -1    8.20    1.60
  -5  -2   1    9.70    2.00
   4   2  -1   36.80    1.90
  -4  -2   1   38.80    2.10
   3   2  -1 1457.55   53.29
  -3  -2   1 1499.75   53.29
  -3  -2   1 1470.75   53.29
   2   2  -1  283.67   10.90
   2   2  -1  307.57   11.00
   2   2  -1  294.87   10.90
  -2  -2   1  291.37   11.00
  -2  -2   1  311.67   10.90
  -2  -2   1  305.57   11.00
   1   2  -1 1786.92   64.59
   1   2  -1 1693.73   64.59
  -1  -2   1 1711.33   64.69
  -1  -2   1 1968.30   64.79
  -1  -2   1 1811.62   64.59
   0   2  -1   82.19    3.20
   0   2  -1   80.69    3.20
   0  -2   1   92.09    3.30
   0  -2   1   85.29    3.20
  -1   2  -1  195.38    7.40
  -1   2  -1  196.98    7.40
   1  -2   1  205.38    7.40
   1  -2   1  203.28    7.40
  -2   2  -1  439.46   16.10
   2  -2   1  439.26   16.10
   2  -2   1  445.06   16.30
  -3   2  -1  245.68    9.10
   3  -2   1  243.58    9.10
  -4   2  -1  236.78    8.90
   4  -2   1  235.28    8.90
  -5   2  -1  326.77   12.50
  -6   2  -1    1.50    1.30
   6  -2   1    1.90    1.30
  -7   2  -1   22.40    2.40
   7  -2   1   16.20    2.10
   7   1  -1   51.39    2.90
  -7  -1   1   48.90    3.10
   6   1  -1  350.86   13.20
  -6  -1   1  354.56   13.30
   5   1  -1   53.39    2.70
  -5  -1   1   56.29    3.00
   4   1  -1  487.15   18.00
  -4  -1   1  502.25   18.10
  -3  -1   1  894.91   32.60
  -3  -1   1  889.21   32.60
  -3  -1   1  919.91   32.60
   2   1  -1 1715.13   62.19
   2   1  -1 1726.53   62.29
  -2  -1   1 1708.03   62.29
  -2  -1   1 1792.02   62.19
  -2  -1   1 1695.23   62.19
   1   1  -1  325.67   12.10
   1   1  -1  340.37   12.10
   1   1  -1  338.57   12.10
  -1  -1   1  333.47   12.10
  -1  -1   1  320.87   12.10
  -1  -1   1  346.37   12.10
   0   1  -1 6768.02  244.68
   0  -1   1 6446.75  244.58
   0  -1   1 7165.18  244.78
  -1   1  -1  474.95   17.40
  -1   1  -1  467.85   17.40
   1  -1   1  493.35   17.40
   1  -1   1  486.45   17.40
  -2   1  -1  947.61   34.40
  -2   1  -1  935.41   34.40
   2  -1   1  961.00   34.40
   2  -1   1  963.20   34.40
  -3   1  -1   17.70    1.70
   3  -1   1   17.90    1.70
  -4   1  -1   37.30    2.20
   4  -1   1   39.00    2.20
  -5   1  -1  433.46   16.20
   5  -1   1  441.86   16.20
  -6   1  -1   60.59    3.30
   6  -1   1   60.19    3.30
  -7   1  -1  183.98    7.50
   7  -1   1  187.08    7.50
  -7   0   1   -1.60    1.50
   6   0  -1  954.00   34.50
  -6   0   1  940.71   34.60
   5   0  -1  629.14   22.70
  -5   0   1  614.54   22.80
   4   0  -1  358.36   13.30
  -4   0   1  364.86   13.40
   3   0  -1   34.40    1.90
  -3   0   1   31.30    2.10
   2   0  -1 4207.28  151.58
   2   0  -1 4525.65  151.78
  -2   0   1 4206.48  151.68
  -2   0   1 3882.41  151.48
   1   0  -1    5.60    0.70
   1   0  -1    5.30    0.80
  -1   0   1    5.30    0.60
  -1   0   1    5.90    0.90
  -1   0  -1    4.80    0.80
  -1   0  -1    5.60    0.70
   1   0   1    6.60    0.80
   1   0   1    5.10    0.80
  -2   0  -1    4.80    1.00
  -2   0  -1    6.50    0.80
   2   0   1    4.60    0.90
   2   0   1    7.10    0.90
  -3   0  -1  257.17    9.70
   3   0   1  267.17    9.70
  -4   0  -1  708.23   26.00
   4   0   1  718.63   25.90
  -5   0  -1  435.56   16.10
   5   0   1  435.66   16.10
  -6   0  -1   83.79    4.00
   6   0   1   82.19    4.00
  -7   0  -1   37.10    2.80
   7   0   1   36.50    2.60
   7  -1  -1   52.49    3.10
  -7   1   1   50.29    3.20
   6  -1  -1  359.56   13.40
  -6   1   1  352.16   13.40
   5  -1  -1   62.49    3.20
  -5   1   1   66.49    3.40
   4  -1  -1  491.25   17.90
  -4   1   1  485.95   17.90
   3  -1  -1  886.61   32.50
  -3   1   1  906.71   32.50
   2  -1  -1 1691.03   60.39
   2  -1  -1 1704.13   60.39
  -2   1   1 1614.84   60.39
  -2   1   1 1694.73   60.39
   1  -1  -1  325.97   11.70
   1  -1  -1  321.57   11.60
  -1   1   1  324.37   11.70
  -1   1   1  314.07   11.60
   0  -1  -1 7088.59  247.98
   0   1   1 6676.53  247.88
  -1  -1  -1  466.95   17.00
  -1  -1  -1  496.95   17.10
  -1  -1  -1  450.05   17.00
   1   1   1  479.55   17.00
   1   1   1  466.35   17.00
  -2  -1  -1  961.30   34.40
  -2  -1  -1  970.80   34.40
   2   1   1  922.41   34.40
   2   1   1  955.20   34.40
  -3  -1  -1   11.80    1.20
  -3  -1  -1   16.10    1.50
   3   1   1   14.40    1.50
  -4  -1  -1   39.70    2.10
   4   1   1   36.50    1.90
  -5  -1  -1  437.36   16.20
   5   1   1  437.46   16.10
  -6  -1  -1   62.89    3.20
   6   1   1   60.69    3.10
  -7  -1  -1  185.28    7.50
   7   1   1  191.08    7.50
   7  -2  -1    0.70    1.40
  -7   2   1    3.70    1.50
   6  -2  -1  110.59    4.70
  -6   2   1  104.79    4.80
   5  -2  -1   10.10    1.80
  -5   2   1   10.40    2.10
   4  -2  -1   36.80    2.10
  -4   2   1   36.80    2.20
   3  -2  -1 1465.45   52.39
  -3   2   1 1436.26   52.39
   2  -2  -1  290.57   10.80
   2  -2  -1  302.47   10.80
  -2   2   1  292.77   10.80
   1  -2  -1 1844.42   64.19
   1  -2  -1 1783.92   64.19
  -1   2   1 1743.63   64.19
  -1   2   1 1760.42   64.19
   0  -2  -1   88.19    3.30
   0   2   1   84.59    3.30
  -1  -2  -1  210.28    7.70
   1   2   1  205.48    7.60
  -2  -2  -1  440.36   16.00
  -2  -2  -1  452.05   16.00
   2   2   1  431.56   16.00
   2   2   1  437.46   16.00
  -3  -2  -1  242.58    8.80
  -3  -2  -1  234.08    8.80
   3   2   1  240.48    8.80
  -4  -2  -1  239.08    8.80
   4   2   1  230.48    8.70
  -5  -2  -1  353.46   12.90
   5   2   1  339.37   12.80
  -6  -2  -1    2.00    1.20
  -7  -2  -1   21.10    2.10
   7   2   1   16.40    2.10
   6  -3  -1   85.09    4.10
  -6   3   1   88.89    4.10
   5  -3  -1   28.90    2.90
  -5   3   1   32.90    2.40
   4  -3  -1  225.08    8.40
  -4   3   1  215.18    8.40
   3  -3  -1  705.83   25.10
  -3   3   1  674.43   25.10
   2  -3  -1   22.60    1.50
   2  -3  -1   25.10    1.70
  -2   3   1   21.80    1.60
   1  -3  -1  623.04   20.80
   1  -3  -1  553.04   20.80
  -1   3   1  565.74   20.90
  -1   3   1  558.64   20.80
  -1   3   1  574.24   20.80
   0   3   1 4655.43  168.18
   2   3   1  323.27   11.60
   2   3   1  304.17   11.50
   2   3   1  323.87   11.70
  -3  -3  -1  157.28    5.70
   3   3   1  147.79    5.70
  -4  -3  -1   61.69    2.70
   4   3   1   61.59    2.60
  -5  -3  -1  249.18    9.10
   5   3   1  238.98    9.10
  -6  -3  -1   41.30    2.30
   6  -4  -1   45.60    3.10
  -6   4   1   47.80    2.90
   5  -4  -1   11.60    2.20
   4  -4  -1   29.70    2.40
  -4   4   1   32.10    2.30
   3  -4  -1 1153.28   40.80
  -3   4   1 1098.79   40.80
   2  -4  -1  604.24   20.80
   2  -4  -1  551.74   20.70
  -2   4   1  558.24   20.80
  -1   4   1  275.17   10.10
  -1   4   1  265.27    9.90
   0   4   1  655.63   25.10
   0   4   1  719.23   25.10
   0   4   1  707.23   25.20
   1   4   1  625.04   22.80
   2   4   1  139.89    5.20
   2   4   1  140.99    5.50
   3   4   1  185.38    6.90
   4   4   1  187.48    7.00
  -5  -4  -1  112.59    4.20
   5   4   1  107.29    4.40
   6  -5  -1   -0.50    1.80
  -6   5   1    4.80    1.40
   5  -5  -1  163.18    6.70
  -5   5   1  170.48    6.70
   4  -5  -1   68.79    3.40
  -4   5   1   72.09    3.40
   3  -5  -1  570.44   20.50
  -3   5   1  547.05   20.50
   2  -5  -1  114.19    4.40
   2  -5  -1  118.89    4.50
  -2   5   1  117.59    4.90
  -1   5   1   67.29    2.80
  -1   5   1   70.29    3.20
   0   5   1   17.20    1.10
   0   5   1   16.70    1.70
   1   5   1   74.49    3.00
   1   5   1   79.49    3.40
   2   5   1  764.42   28.70
   2   5   1  824.52   29.00
   3   5   1 1129.39   42.60
   3   5   1 1231.68   42.90
   5  -6  -1  119.79    5.30
  -5   6   1  129.39    5.20
  -4   6   1   11.80    1.80
  -4   6   1   14.00    2.00
  -3   6   1   25.10    2.50
  -3   6   1   28.50    1.90
  -2   6   1   60.89    2.60
  -2   6   1   55.19    3.20
  -1   6   1  193.68    7.50
  -1   6   1  208.08    7.80
   0   6   1  109.19    4.80
   1   6   1   29.60    2.40
   3   6   1   60.59    3.40
  -4   7   1   13.70    2.20
  -3   7   1   37.20    2.80
  -2   7   1    1.20    1.60
  -1   7   1   62.49    3.40
   0   7   1   -0.30    1.50
   1   7   1   12.90    2.20
   2   7   1   59.29    3.30
   3   7   1   27.00    2.50
  -2   8   1   36.40    2.80
  -1   8   1   21.70    2.30
   0   8   1   27.70    2.70
   1   8   1   11.80    2.40
   2   8   1  120.49    5.30
   2   8  -2   22.80    2.50
   1   8  -2    5.20    1.70
   0   8  -2    3.20    1.60
  -1   8  -2    8.30    1.70
  -2   8  -2   92.39    4.70
   4   7  -2   10.10    2.30
   3   7  -2   77.39    3.90
   2   7  -2   10.90    2.20
   1   7  -2  103.79    4.80
   0   7  -2   77.29    3.90
  -1   7  -2   38.80    3.00
  -2   7  -2  149.29    6.30
  -3   7  -2   23.50    2.60
  -4   7  -2    7.60    1.30
   4  -7   2    7.40    1.60
   4   6  -2  318.47   12.10
   3   6  -2  596.64   22.00
   2   6  -2    9.90    2.30
   1   6  -2    1.10    1.40
   1   6  -2    4.80    1.00
   0   6  -2   67.99    3.50
  -1   6  -2   41.40    2.10
  -1   6  -2   34.90    2.90
   1  -6   2   40.00    2.10
  -2   6  -2  549.85   20.40
   2  -6   2  564.24   20.40
  -3   6  -2  471.75   17.80
   3  -6   2  490.45   17.80
  -4   6  -2  102.89    4.40
   4  -6   2   98.49    4.60
  -5   6  -2   33.00    2.60
   5  -6   2   25.10    2.80
   4   5  -2   50.39    2.40
   4   5  -2   47.60    3.00
  -4  -5   2   57.19    2.30
   3   5  -2  975.30   36.20
   3   5  -2 1022.60   36.30
   2   5  -2  260.47    9.70
   2   5  -2  266.27   10.00
   1   5  -2  128.99    5.00
   1   5  -2  130.99    5.20
   0   5  -2   63.49    3.10
   0   5  -2   62.79    2.70
   0  -5   2   63.99    2.50
   0  -5   2   64.69    2.80
  -1   5  -2  192.58    7.80
   1  -5   2  215.78    7.70
   1  -5   2  199.68    7.50
  -2   5  -2 1432.86   54.19
   2  -5   2 1565.44   54.29
  -3   5  -2   31.60    2.40
  -4   5  -2   36.50    2.80
   4  -5   2   35.90    2.70
  -5   5  -2   20.00    2.30
   5  -5   2   15.70    2.40
   6   4  -2   13.20    1.80
  -6  -4   2   16.40    1.70
   5   4  -2   62.09    2.90
  -5  -4   2   65.69    3.00
   4   4  -2  158.88    6.30
   4   4  -2  171.28    6.50
  -4  -4   2  168.28    6.40
   3   4  -2  102.89    4.10
  -3  -4   2   95.69    3.80
  -3  -4   2   99.89    4.00
   2   4  -2    5.60    1.00
   2   4  -2    4.00    0.90
   1   4  -2  426.96   16.00
   1   4  -2  434.86   15.90
  -1  -4   2  443.66   16.00
  -1  -4   2  439.36   15.80
   0   4  -2  475.65   17.60
   0  -4   2  484.55   17.40
  -1   4  -2  173.28    6.70
   1  -4   2  181.38    6.80
   1  -4   2  179.88    6.70
  -2   4  -2   -0.70    0.80
  -3   4  -2   25.30    2.00
   3  -4   2   26.50    2.30
  -4   4  -2   23.30    2.30
   4  -4   2   21.90    2.50
  -5   4  -2   45.70    2.90
   5  -4   2   41.20    3.00
  -6   4  -2    3.80    1.40
   6  -4   2    6.90    1.80
   6   3  -2   45.00    2.80
  -6  -3   2   42.40    2.70
   5   3  -2  154.78    6.00
  -5  -3   2  155.18    6.20
   4   3  -2   67.19    2.90
  -4  -3   2   69.19    3.10
   3   3  -2   53.49    2.50
  -3  -3   2   53.89    2.30
  -3  -3   2   56.89    2.50
   2   3  -2  206.48    7.70
   2   3  -2  199.68    7.60
  -2  -3   2  209.08    7.60
   1   3  -2 1163.68   41.20
   1   3  -2 1045.00   41.20
  -1  -3   2 1215.18   41.20
   0   3  -2  696.43   27.30
   0  -3   2  794.52   27.40
   0  -3   2  775.22   27.30
  -1   3  -2  137.99    5.20
   1  -3   2  135.19    5.20
  -2   3  -2  144.09    5.70
   2  -3   2  150.38    5.80
  -3   3  -2   82.29    3.50
   3  -3   2   83.19    3.60
  -4   3  -2  136.29    5.60
   4  -3   2  142.59    5.70
  -5   3  -2   33.30    2.50
   5  -3   2   26.20    2.70
  -6   3  -2   32.10    2.60
   6  -3   2   28.50    2.70
   7   2  -2    9.20    1.80
  -7  -2   2    9.30    1.60
   6   2  -2   12.40    2.20
  -6  -2   2   18.30    2.10
   5   2  -2    8.80    1.60
  -5  -2   2    9.30    1.50
   4   2  -2   41.50    2.10
  -4  -2   2   43.40    2.40
   3   2  -2   23.40    1.40
  -3  -2   2   19.50    1.40
  -3  -2   2   22.80    1.70
   2   2  -2  300.47   10.80
   2   2  -2  284.47   11.10
   2   2  -2  288.77   10.80
  -2  -2   2  300.87   10.80
  -2  -2   2  305.17   10.90
  -2  -2   2  290.77   10.80
   1   2  -2  946.51   32.60
   1   2  -2  856.71   32.60
   1   2  -2  878.01   32.60
  -1  -2   2  896.21   32.60
  -1  -2   2  933.11   32.60
   0   2  -2 1486.45   55.99
   0  -2   2 1589.94   55.89
   0  -2   2 1579.74   55.99
  -1   2  -2  437.16   15.90
  -1   2  -2  413.46   15.90
   1  -2   2  435.56   15.90
   1  -2   2  464.25   15.90
   2  -2   2  404.76   14.50
   2  -2   2  384.66   14.40
  -3   2  -2  158.88    6.10
   3  -2   2  158.78    6.10
  -4   2  -2   22.00    2.00
   4  -2   2   20.90    2.00
  -6   2  -2   52.19    3.00
   6  -2   2   49.20    3.00
   7   1  -2    4.30    1.30
  -7  -1   2    3.50    1.50
   6   1  -2  450.05   16.80
  -6  -1   2  457.55   16.90
   5   1  -2  102.89    4.30
  -5  -1   2  105.19    4.50
   4   1  -2    1.50    0.80
  -4  -1   2    1.90    1.00
   3   1  -2  810.62   29.60
  -3  -1   2  811.12   29.60
  -3  -1   2  832.92   29.70
   2   1  -2 1511.95   56.09
   2   1  -2 1551.04   56.09
   2   1  -2 1569.44   55.99
  -2  -1   2 1550.74   55.99
  -2  -1   2 1595.14   56.09
  -2  -1   2 1553.04   56.09
   1   1  -2 5980.20  189.48
   1   1  -2 4570.84  189.38
   1   1  -2 4873.41  189.28
  -1  -1   2 5165.98  189.28
  -1  -1   2 5677.93  189.58
   0   1  -2 9675.83  350.16
   0   1  -2 9631.44  350.06
   0  -1   2 9852.51  350.16
  -1   1  -2 1044.60   37.70
  -1   1  -2 1013.70   37.70
   1  -1   2 1063.29   37.70
   1  -1   2 1062.69   37.70
  -2   1  -2 2976.40  111.29
  -2   1  -2 3111.09  111.39
   2  -1   2 3133.39  111.39
   2  -1   2 3145.29  111.39
  -3   1  -2  189.58    7.20
   3  -1   2  193.58    7.30
  -4   1  -2  197.88    7.50
   4  -1   2  195.18    7.50
  -5   1  -2  331.17   12.70
   5  -1   2  348.77   12.80
  -6   1  -2   15.40    2.20
   6  -1   2   12.60    2.20
  -7   1  -2   46.10    2.70
   7  -1   2   42.10    3.00
   7   0  -2    1.80    1.40
  -7   0   2    2.30    1.50
   6   0  -2  249.68    9.50
  -6   0   2  240.68    9.60
   5   0  -2    5.60    1.30
   4   0  -2  117.49    4.60
  -4   0   2  118.99    4.80
   3   0  -2    4.60    0.90
  -3   0   2    3.90    1.00
   2   0  -2  463.75   17.20
   2   0  -2  486.45   17.20
  -2   0   2  477.85   17.10
  -2   0   2  471.15   17.20
  -2   0   2  475.55   17.30
   1   0  -2 1200.58   43.40
   1   0  -2 1201.68   43.40
  -1   0   2 1197.08   43.40
  -1   0   2 1215.88   43.40
   0   0  -2  305.37   11.20
   0   0  -2  309.77   11.20
   0   0   2  313.27   11.20
   0   0   2  314.67   11.20
  -1   0  -2    2.00    0.50
   1   0   2    2.20    0.50
  -2   0  -2  134.09    5.00
  -2   0  -2  136.39    5.10
   2   0   2  134.49    5.10
   2   0   2  134.89    5.10
  -3   0  -2   66.19    2.90
   3   0   2   69.59    3.00
  -4   0  -2  237.88    8.90
   4   0   2  235.88    8.90
  -5   0  -2 2058.39   74.79
   5   0   2 2078.59   74.79
  -6   0  -2   13.20    2.10
   6   0   2   11.60    2.00
  -7   0  -2   95.09    4.40
   7   0   2   96.89    4.40
   7  -1  -2    4.70    1.40
  -7   1   2    4.90    1.50
   6  -1  -2  467.35   17.50
  -6   1   2  474.55   17.60
   5  -1  -2  108.99    4.60
  -5   1   2  111.29    4.70
   4  -1  -2    1.90    1.00
  -4   1   2    2.10    1.00
   3  -1  -2  802.32   29.20
  -3   1   2  812.92   29.30
   2  -1  -2 1490.95   53.89
   2  -1  -2 1504.55   53.89
  -2   1   2 1442.96   53.79
  -2   1   2 1537.65   53.89
   1  -1  -2 5173.38  181.28
   1  -1  -2 4905.21  181.28
  -1   1   2 5645.04  181.28
  -1   1   2 5031.20  181.38
  -1   1   2 4406.46  181.18
   0  -1  -2 9999.00  352.66
   0   1   2 9584.84  352.56
  -1  -1  -2 1051.09   39.10
   1   1   2 1024.70   39.10
   1   1   2 1178.98   39.20
  -2  -1  -2 3818.82  143.79
   2   1   2 4461.05  143.89
   2   1   2 3683.63  143.79
  -3  -1  -2  192.38    7.20
  -3  -1  -2  187.28    7.10
   3   1   2  194.98    7.20
  -4  -1  -2  194.08    7.50
   4   1   2  201.08    7.50
  -5  -1  -2  332.47   12.40
   5   1   2  329.37   12.30
  -6  -1  -2   14.80    2.00
   6   1   2   12.00    1.90
  -7  -1  -2   39.40    2.70
   7   1   2   42.00    2.80
   7  -2  -2    9.40    1.70
  -7   2   2   14.00    2.30
   6  -2  -2   13.80    2.20
  -6   2   2   17.30    2.30
   5  -2  -2    9.70    1.90
  -5   2   2   10.70    2.10
   4  -2  -2   40.70    2.20
  -4   2   2   39.30    2.40
   3  -2  -2   21.50    1.70
  -3   2   2   21.70    1.80
   2  -2  -2  291.27   10.60
   2  -2  -2  294.67   10.60
  -2   2   2  282.57   10.60
   1  -2  -2  938.81   31.40
   1  -2  -2  799.82   31.40
  -1   2   2  883.41   31.40
  -1   2   2  850.61   31.40
  -1   2   2  879.11   31.40
   0  -2  -2 1550.44   54.49
   0   2   2 1474.25   54.49
  -1  -2  -2  457.85   16.50
   1   2   2  452.15   16.50
  -2  -2  -2  390.06   13.80
  -2  -2  -2  377.56   13.80
   2   2   2  374.46   13.80
   2   2   2  380.66   13.80
  -3  -2  -2  156.68    5.90
  -3  -2  -2  160.58    5.90
   3   2   2  155.58    5.90
  -4  -2  -2   16.90    1.20
  -4  -2  -2   22.00    1.60
   4   2   2   18.80    1.50
  -5  -2  -2   45.10    2.40
   5   2   2   42.30    2.40
  -6  -2  -2   50.09    2.70
   6  -3  -2   43.20    2.80
  -6   3   2   43.50    2.80
  -5   3   2  161.88    6.50
   4  -3  -2   70.29    3.20
  -4   3   2   64.59    3.20
   3  -3  -2   55.29    2.60
  -3   3   2   55.69    2.60
   2  -3  -2  197.18    7.40
  -2   3   2  199.18    7.40
  -1   3   2 1127.79   41.00
  -1   3   2 1131.69   41.10
  -1   3   2 1151.58   41.00
   0   3   2  752.12   27.30
   1   3   2  138.89    5.40
   2   3   2  140.69    5.30
   2   3   2  145.39    5.30
   3   3   2   78.49    3.10
  -4  -3  -2  131.09    5.10
   4   3   2  136.89    5.10
  -5  -3  -2   29.80    1.70
   5   3   2   23.80    1.80
  -6  -3  -2   31.10    1.90
   6  -4  -2   10.40    1.70
  -6   4   2   13.70    2.10
   5  -4  -2   64.29    3.40
   4  -4  -2  168.08    6.50
  -4   4   2  160.68    6.50
   3  -4  -2   97.19    3.90
   3  -4  -2   86.49    3.60
  -3   4   2   95.49    3.90
   2  -4  -2    9.20    1.00
   2  -4  -2    6.70    1.20
  -2   4   2    5.50    1.00
  -2   4   2    8.20    1.10
  -1   4   2  409.06   15.20
  -1   4   2  431.26   15.40
   0   4   2  487.45   17.80
   1   4   2  181.08    6.90
   2   4   2   -0.60    0.50
   2   4   2    0.30    0.80
   3   4   2   24.80    1.30
   4   4   2   18.60    1.40
   5   4   2   39.10    2.30
   6  -5  -2   11.80    2.40
  -6   5   2   15.60    2.40
   5  -5  -2    7.70    1.60
  -5   5   2   12.50    2.00
   4  -5  -2   47.80    2.70
  -4   5   2   49.90    2.70
   3  -5  -2  985.30   34.80
  -3   5   2  949.11   34.90
  -3   5   2  944.71   34.80
  -2   5   2  251.67    9.60
  -2   5   2  263.57    9.70
  -1   5   2  128.59    5.00
  -1   5   2  119.59    4.70
   0   5   2   63.59    2.90
   1   5   2  202.18    7.70
   2   5   2 1507.85   54.59
   5  -6  -2   65.39    3.30
  -5   6   2   71.39    3.40
   4  -6  -2  292.17   11.10
  -4   6   2  311.27   11.20
  -4   6   2  292.67   11.20
  -3   6   2  537.35   20.60
  -3   6   2  591.24   20.80
  -2   6   2    8.60    2.00
  -1   6   2    4.10    0.90
  -1   6   2    1.90    1.40
   0   6   2   65.19    3.30
   1   6   2   36.60    2.50
   3   6   2  492.35   18.20
  -3   7   2   77.49    3.90
  -2   7   2   11.30    2.50
  -1   7   2  105.99    4.80
   0   7   2   71.59    3.70
   1   7   2   33.60    2.60
   2   7   2  136.29    5.80
   3   7   2   21.80    2.30
  -2   8   2   24.90    2.50
  -1   8   2    4.80    1.60
   0   8   2    2.40    1.50
   1   8   2    7.10    1.50
   2   8   2   80.99    4.10
   2   8  -3   39.10    2.90
   1   8  -3    2.20    1.60
   0   8  -3   24.20    2.60
  -1   8  -3   16.10    2.60
  -2   8  -3  258.17   10.30
   4   7  -3   69.39    3.60
   3   7  -3   84.59    4.10
   2   7  -3    7.60    1.50
   1   7  -3   10.60    2.40
   0   7  -3   98.59    4.70
  -1   7  -3    1.40    1.60
  -1   7  -3    0.80    1.00
  -2   7  -3    5.10    1.10
  -2   7  -3    5.40    1.80
   2  -7   3    2.60    1.20
   3  -7   3   39.10    2.60
   4   6  -3   35.10    2.60
   3   6  -3  446.16   16.90
   3   6  -3  466.95   17.00
   2   6  -3   42.30    2.00
   2   6  -3   42.40    3.20
   1   6  -3  125.49    4.90
   1   6  -3  126.69    5.40
   0   6  -3   40.20    2.00
   0   6  -3   34.90    3.00
   0  -6   3   44.50    2.10
   1  -6   3  104.89    4.40
  -2   6  -3   59.89    2.90
   2  -6   3   53.79    3.10
  -3   6  -3   36.40    2.40
  -4   6  -3   90.99    4.10
   4  -6   3   84.59    4.20
   5   5  -3    9.90    1.40
  -5  -5   3    7.50    1.50
   4   5  -3  622.94   22.70
   4   5  -3  602.24   22.60
  -4  -5   3  631.94   22.50
   3   5  -3  130.39    5.40
   3   5  -3  128.79    5.20
  -3  -5   3  135.59    5.10
   2   5  -3   22.10    2.00
  -2  -5   3   24.70    1.60
   1   5  -3   18.30    1.90
   1   5  -3   17.00    1.80
  -1  -5   3   19.10    1.10
  -1  -5   3   19.50    1.50
   0   5  -3  230.58    8.80
   0  -5   3  243.68    8.70
   0  -5   3  219.98    8.50
  -1   5  -3   85.99    3.40
   1  -5   3   75.59    3.10
   1  -5   3   78.09    3.60
  -2   5  -3  251.17    9.60
   2  -5   3  257.27    9.80
  -3   5  -3  136.69    5.50
   3  -5   3  136.49    5.70
   4  -5   3  123.79    5.40
  -5   5  -3    7.00    1.40
   5  -5   3    5.50    1.80
   6   4  -3   78.39    3.50
  -6  -4   3   77.89    3.50
   5   4  -3  225.48    8.70
  -5  -4   3  233.28    8.70
   4   4  -3  140.09    5.60
   4   4  -3  146.59    5.80
  -4  -4   3  148.19    5.70
   3   4  -3  110.39    4.50
   3   4  -3  116.89    4.60
  -3  -4   3  118.39    4.50
  -3  -4   3  109.89    4.30
   2   4  -3  339.27   12.70
   2   4  -3  348.17   12.90
  -2  -4   3  343.27   12.70
  -2  -4   3  359.26   12.80
   1   4  -3  271.47   10.30
   1   4  -3  268.07   10.20
  -1  -4   3  298.27   10.30
  -1  -4   3  270.47   10.20
   0   4  -3  308.47   11.60
   0  -4   3  302.77   11.60
   0  -4   3  338.27   11.70
  -1   4  -3  268.87   10.50
   1  -4   3  294.47   10.50
   1  -4   3  280.47   10.40
  -2   4  -3 1819.92   67.89
   2  -4   3 1939.11   67.89
  -3   4  -3   80.49    3.70
   3  -4   3   84.19    3.90
  -4   4  -3   55.19    3.10
  -5   4  -3  218.58    8.60
   5  -4   3  218.78    8.70
  -6   4  -3   34.40    2.70
   6  -4   3   25.40    2.70
   6   3  -3   77.59    3.50
  -6  -3   3   74.89    3.60
   5   3  -3   33.10    2.10
  -5  -3   3   32.60    2.50
   4   3  -3   56.59    2.60
  -4  -3   3   58.19    2.80
   3   3  -3  373.46   13.40
   3   3  -3  353.76   13.30
  -3  -3   3  365.06   13.40
   2   3  -3  106.29    4.30
   2   3  -3  112.19    4.40
  -2  -3   3  108.59    4.20
  -2  -3   3  111.89    4.40
   1   3  -3 1923.51   69.69
  -1  -3   3 1945.31   69.89
   0   3  -3  192.28    7.70
   0  -3   3  203.28    7.70
   0  -3   3  225.78    8.10
  -1   3  -3    5.90    1.00
   1  -3   3    6.20    0.90
   1  -3   3    5.50    1.30
  -2   3  -3  234.28    9.00
   2  -3   3  250.17    9.10
  -3   3  -3  403.46   15.10
   3  -3   3  419.16   15.20
  -4   3  -3   33.80    2.40
   4  -3   3   30.10    2.60
  -5   3  -3  255.57   10.20
   5  -3   3  276.47   10.30
  -6   3  -3   23.70    2.40
   6  -3   3   17.80    2.60
   7   2  -3   18.10    1.90
  -7  -2   3   17.20    2.40
   6   2  -3  204.08    7.80
  -6  -2   3  201.58    8.00
   5   2  -3  187.38    7.10
  -5  -2   3  182.78    7.30
   4   2  -3  112.59    4.50
  -4  -2   3  118.79    4.70
   3   2  -3   52.29    2.30
   3   2  -3   52.39    2.40
  -3  -2   3   52.69    2.60
   2   2  -3   83.59    3.40
   2   2  -3   84.89    3.40
  -2  -2   3   82.59    3.40
   1   2  -3  278.47   10.20
   1   2  -3  263.27   10.20
  -1  -2   3  287.47   10.20
  -1  -2   3  282.87   10.20
   0   2  -3  875.01   32.50
   0   2  -3  890.31   32.50
   0  -2   3  931.51   32.60
   0  -2   3  903.51   32.50
  -1   2  -3    5.90    0.80
  -1   2  -3    5.20    0.90
   1  -2   3    4.90    1.00
   1  -2   3    5.20    1.10
  -2   2  -3 2235.88   83.19
   2  -2   3 2376.96   83.19
  -3   2  -3   78.19    3.40
   3  -2   3   83.49    3.50
  -4   2  -3   35.50    2.30
   4  -2   3   37.80    2.40
  -5   2  -3   36.90    2.50
   5  -2   3   31.30    2.60
  -6   2  -3   21.00    2.30
   6  -2   3   17.80    2.30
   7   1  -3   13.00    2.00
  -7  -1   3   11.30    1.80
   6   1  -3  139.69    5.70
  -6  -1   3  139.39    5.90
   5   1  -3   29.40    2.10
  -5  -1   3   31.30    2.50
   4   1  -3  123.89    4.90
  -4  -1   3  125.69    4.90
  -4  -1   3  123.19    4.70
   3   1  -3 1385.36   49.00
  -3  -1   3 1318.37   48.90
  -3  -1   3 1367.66   49.10
   2   1  -3  417.46   14.80
   2   1  -3  393.66   14.90
   2   1  -3  414.96   14.80
  -2  -1   3  404.36   14.90
  -2  -1   3  406.76   14.80
   1   1  -3 5396.56  192.18
   1   1  -3 5311.17  192.38
  -1  -1   3 5294.77  192.18
   0   1  -3  499.65   18.10
   0   1  -3  482.35   18.10
   0  -1   3  504.05   18.10
   0  -1   3  513.05   18.10
  -1   1  -3  261.47    9.70
  -1   1  -3  267.07    9.70
   1  -1   3  270.77    9.70
   1  -1   3  263.37    9.70
  -2   1  -3  657.03   24.00
   2  -1   3  670.43   24.20
  -3   1  -3  616.34   22.90
   3  -1   3  643.34   22.90
  -4   1  -3  116.69    4.80
   4  -1   3  118.29    4.80
   5  -1   3  654.53   24.10
  -6   1  -3   46.10    2.80
   6  -1   3   49.00    2.90
   7  -1   3   11.20    2.30
   7   0  -3   38.00    2.80
  -7   0   3   35.90    3.00
   6   0  -3  486.85   17.80
  -6   0   3  473.55   17.90
   5   0  -3  321.27   11.90
  -5   0   3  319.07   12.00
   4   0  -3   13.80    1.40
  -4   0   3   14.80    1.70
  -4   0   3   10.70    1.00
   3   0  -3   83.09    3.40
  -3   0   3   80.59    3.10
  -3   0   3   84.29    3.60
   2   0  -3   92.89    3.70
   2   0  -3   94.19    3.60
  -2   0   3   97.09    3.60
  -2   0   3   96.69    3.80
   1   0  -3  336.47   12.50
   1   0  -3  338.97   12.60
  -1   0   3  351.86   12.50
  -1   0   3  356.06   12.60
   0   0  -3  681.13   25.20
   0   0  -3  692.23   25.20
   0   0   3  707.73   25.20
   0   0   3  714.23   25.20
  -1   0  -3  681.93   24.70
  -1   0  -3  693.03   24.80
   1   0   3  689.43   24.80
   1   0   3  676.13   24.80
  -2   0  -3    6.10    1.30
  -2   0  -3    7.20    1.00
   2   0   3    8.20    1.20
   2   0   3    8.00    1.10
  -3   0  -3    0.30    0.80
   3   0   3    0.30    1.00
  -4   0  -3  775.12   28.30
   4   0   3  779.72   28.30
  -5   0  -3 1181.08   43.70
   5   0   3 1224.18   43.70
  -6   0  -3   -0.60    1.20
   6   0   3   -1.20    1.30
  -7   0  -3   17.20    2.10
   7   0   3   13.70    2.50
   7  -1  -3   14.00    2.10
  -7   1   3   12.60    2.40
   6  -1  -3  152.08    6.20
  -6   1   3  151.18    6.30
   5  -1  -3   34.70    2.40
  -5   1   3   34.90    2.50
   4  -1  -3  123.79    4.90
  -4   1   3  127.09    5.10
   3  -1  -3 1314.97   48.20
  -3   1   3 1356.66   48.30
   2  -1  -3  387.86   14.20
   2  -1  -3  395.16   14.20
  -2   1   3  378.46   14.20
  -2   1   3  398.66   14.20
   1  -1  -3 6625.44  219.88
   1  -1  -3 6161.98  219.88
   1  -1  -3 6117.09  220.08
  -1   1   3 6150.98  220.08
  -1   1   3 5607.84  219.88
  -1   1   3 5978.00  219.88
  -1  -1  -3  263.37    9.60
  -1  -1  -3  269.07    9.60
   1   1   3  264.27    9.60
   1   1   3  267.47    9.70
  -2  -1  -3  691.63   24.70
  -2  -1  -3  684.83   24.70
   2   1   3  683.33   24.70
   2   1   3  671.43   24.70
  -3  -1  -3  626.84   22.50
  -3  -1  -3  615.44   22.50
  -4  -1  -3  111.59    4.60
   4   1   3  116.99    4.60
  -5  -1  -3  605.34   22.60
   5   1   3  631.54   22.60
  -6  -1  -3   47.70    2.70
   6   1   3   49.50    2.80
   7   1   3   17.60    2.20
   7  -2  -3   16.30    2.20
  -7   2   3   19.50    2.50
   6  -2  -3  203.48    8.00
  -6   2   3  206.68    8.10
   5  -2  -3  193.48    7.50
  -5   2   3  195.18    7.70
   4  -2  -3  114.19    4.60
  -4   2   3  113.89    4.70
   3  -2  -3   46.70    2.30
  -3   2   3   47.80    2.40
   2  -2  -3   76.99    3.20
   2  -2  -3   82.39    3.20
  -2   2   3   74.79    3.10
  -2   2   3   76.89    3.20
   1  -2  -3  268.57    9.50
  -1   2   3  247.28    9.40
  -1   2   3  256.47    9.40
  -1   2   3  264.57    9.50
   0  -2  -3  898.81   32.30
   0   2   3  889.21   32.30
   2   2   3 2120.39   83.89
   2   2   3 2539.15   84.09
  -3  -2  -3   83.79    3.20
  -3  -2  -3   81.39    3.20
   3   2   3   79.59    3.20
  -4  -2  -3   36.60    1.90
  -4  -2  -3   33.80    1.60
   4   2   3   38.80    2.00
  -5  -2  -3   35.10    2.20
   5   2   3   35.80    2.20
  -6  -2  -3   21.00    1.80
   6  -3  -3   79.19    3.80
  -6   3   3   77.29    3.90
  -5   3   3   37.10    2.60
   4  -3  -3   61.29    3.00
  -4   3   3   59.49    3.00
   3  -3  -3  303.17   12.20
   3  -3  -3  352.76   12.10
  -3   3   3  328.27   12.10
   2  -3  -3  105.59    4.60
   2  -3  -3  107.09    4.10
  -2   3   3  102.69    4.10
  -2   3   3  102.79    4.10
  -1   3   3 1869.61   67.29
  -1   3   3 1874.51   67.29
  -1   3   3 1865.11   67.39
   0   3   3  200.58    7.50
   1   3   3    7.40    1.40
   2   3   3  249.38    8.70
   2   3   3  226.48    8.70
   3   3   3  389.76   14.20
  -4  -3  -3   31.20    1.60
   4   3   3   28.80    1.70
  -5  -3  -3  255.07    9.60
   5   3   3  260.97    9.70
  -6  -3  -3   18.20    1.50
   6  -4  -3   74.99    3.80
  -6   4   3   79.79    3.80
   5  -4  -3  231.98    8.60
  -5   4   3  212.38    8.90
   4  -4  -3  141.39    5.50
  -4   4   3  132.39    5.50
   3  -4  -3  102.69    4.20
   3  -4  -3  114.19    4.40
  -3   4   3  117.39    4.40
  -3   4   3  103.89    4.40
  -2   4   3  327.67   12.00
  -2   4   3  326.47   12.10
  -1   4   3  248.48    9.40
  -1   4   3  266.17    9.60
  -1   4   3  258.17    9.40
   0   4   3  315.87   11.70
   1   4   3  292.17   10.80
   2   4   3 1798.22   64.99
   3   4   3   79.09    3.10
   4   4   3   48.30    2.20
  -6   5   3   21.90    2.40
   5  -5  -3    4.20    1.40
   4  -5  -3  612.24   21.90
  -4   5   3  600.64   21.90
  -4   5   3  586.04   22.00
   3  -5  -3  122.09    4.70
  -3   5   3  122.19    4.80
  -3   5   3  117.19    4.90
  -2   5   3   22.50    1.40
  -2   5   3   19.00    1.90
  -1   5   3   18.70    1.80
  -1   5   3   18.40    1.10
   0   5   3  218.88    8.30
   1   5   3   79.39    3.50
   2   5   3  268.97   10.20
   5  -6  -3   28.60    2.30
  -5   6   3   39.10    2.80
   4  -6  -3   30.20    2.20
  -4   6   3   34.30    2.20
  -4   6   3   35.50    2.50
  -3   6   3  444.26   16.40
  -2   6   3   44.60    2.70
  -1   6   3  119.69    5.00
   0   6   3   38.70    2.60
   1   6   3  101.39    4.40
   2   6   3   60.19    3.70
  -3   7   3   88.39    5.30
  -1   7   3   10.40    1.90
   0   7   3   96.69    4.50
   1   7   3    2.80    1.30
   2   7   3    4.20    1.40
  -2   8   3   39.80    2.90
  -1   8   3    1.00    1.50
   0   8   3   17.40    2.30
   1   8   3   17.50    2.30
   2   8   3  243.18    9.60
   2   8  -4    4.90    1.60
   1   8  -4   84.29    4.30
   0   8  -4    7.70    1.70
  -1   8  -4   65.89    3.80
  -2   8  -4   87.09    4.60
   4   7  -4   46.80    2.90
   3   7  -4    7.20    1.50
   2   7  -4  109.89    5.00
   1   7  -4    4.60    1.60
   0   7  -4    9.70    1.70
   0   7  -4    9.50    1.70
  -1   7  -4   12.50    2.50
  -1   7  -4   12.00    1.30
   1  -7   4   15.50    1.60
  -3   7  -4    2.40    1.10
   3  -7   4    3.00    1.50
   5   6  -4   22.60    2.00
   4   6  -4    8.90    1.40
   3   6  -4   45.20    2.20
   3   6  -4   43.80    2.80
  -3  -6   4   42.70    2.10
   2   6  -4   96.79    4.10
  -2  -6   4  106.09    4.00
   1   6  -4  229.98    9.10
   1   6  -4  226.08    8.70
  -1  -6   4  243.48    8.70
   0   6  -4  517.65   19.30
   0   6  -4  525.85   19.60
   0  -6   4  541.25   19.30
  -1   6  -4  203.38    7.80
   1  -6   4  206.28    8.00
  -2   6  -4  309.77   11.70
   2  -6   4  312.07   11.80
   3  -6   4   39.80    2.90
  -4   6  -4   54.89    3.00
   4  -6   4   43.20    3.20
   5   5  -4   80.89    3.50
   4   5  -4  706.03   26.60
   4   5  -4  730.43   26.70
  -4  -5   4  752.32   26.60
   3   5  -4  315.87   12.00
   3   5  -4  324.27   12.20
  -3  -5   4  332.97   12.00
   2   5  -4   65.39    2.90
   2   5  -4   64.29    3.20
  -2  -5   4   65.09    3.00
   1   5  -4   60.79    3.10
   1   5  -4   62.69    2.70
  -1  -5   4   62.19    2.90
  -1  -5   4   59.49    2.50
   0   5  -4   69.29    3.00
   0  -5   4   65.29    2.80
   0  -5   4   74.39    3.30
   1  -5   4   15.70    2.10
  -2   5  -4 1783.62   65.59
   2  -5   4 1843.82   65.69
  -3   5  -4   28.90    2.30
  -4   5  -4    3.70    1.30
   4  -5   4    1.80    1.60
  -5   5  -4   39.10    2.70
   5  -5   4   34.30    3.00
   6   4  -4  134.19    5.30
  -6  -4   4  129.79    5.40
   5   4  -4   63.49    3.10
   4   4  -4  296.77   11.10
   4   4  -4  291.27   11.10
  -4  -4   4  302.87   11.10
   3   4  -4  190.38    7.30
   3   4  -4  185.18    7.20
  -3  -4   4  197.88    7.30
   2   4  -4  196.68    7.50
   2   4  -4  197.98    7.40
  -2  -4   4  183.38    7.30
  -2  -4   4  209.68    7.50
   1   4  -4  691.43   25.10
  -1  -4   4  646.24   24.90
  -1  -4   4  725.53   25.00
   0  -4   4    2.90    0.80
   0  -4   4    3.70    1.10
   1  -4   4  219.58    8.40
  -2   4  -4   48.20    2.50
   2  -4   4   46.80    2.90
  -3   4  -4   14.60    1.80
   3  -4   4   13.20    2.30
   4  -4   4  114.49    5.10
  -5   4  -4  119.59    5.10
   5  -4   4  113.39    5.20
  -6   4  -4   33.10    2.60
   6   3  -4   17.20    1.80
  -6  -3   4   19.20    2.20
   5   3  -4   23.90    1.90
  -5  -3   4   24.30    2.70
   4   3  -4   63.39    2.90
   4   3  -4   62.29    2.80
  -4  -3   4   70.09    3.30
   3   3  -4    6.70    1.20
   3   3  -4    7.40    1.20
  -3  -3   4    6.50    1.10
   2   3  -4  266.27    9.80
  -2  -3   4  271.57    9.90
  -2  -3   4  254.57    9.70
   1   3  -4  209.98    8.20
  -1  -3   4  235.88    8.30
  -1  -3   4  212.38    8.10
   0   3  -4  287.77   11.10
   0  -3   4  293.47   11.10
   0  -3   4  322.77   11.30
  -1   3  -4  153.88    6.20
   1  -3   4  168.28    6.30
  -2   3  -4  483.65   18.00
   2  -3   4  499.55   18.10
  -3   3  -4    5.40    1.10
   3  -3   4    4.20    1.30
  -4   3  -4   18.40    2.10
   4  -3   4   12.00    2.30
  -5   3  -4  219.38    8.40
   5  -3   4  208.48    8.50
  -6   3  -4    5.90    1.40
   6  -3   4    5.30    1.80
   7   2  -4    5.20    1.30
  -7  -2   4    7.40    1.70
   6   2  -4    3.40    1.20
  -6  -2   4    4.60    1.60
   5   2  -4   35.90    2.20
  -5  -2   4   34.10    2.70
   4   2  -4   83.99    3.60
  -4  -2   4   87.79    3.80
   3   2  -4  251.17    9.30
   3   2  -4  251.37    9.40
  -3  -2   4  256.47    9.50
   2   2  -4  256.37    9.40
   2   2  -4  253.47    9.50
  -2  -2   4  249.18    9.50
  -2  -2   4  264.87    9.60
   1   2  -4  544.45   21.00
   1   2  -4  577.54   21.00
  -1  -2   4  608.14   21.10
  -1  -2   4  583.04   21.00
   0   2  -4 1550.54   57.09
   0   2  -4 1575.74   57.09
   0  -2   4 1620.64   57.19
   0  -2   4 1586.74   57.09
  -1   2  -4  413.06   14.90
   1  -2   4  401.66   14.90
  -2   2  -4    7.10    1.50
   2  -2   4    7.20    1.20
  -3   2  -4  173.38    6.80
   3  -2   4  184.38    6.90
  -4   2  -4   29.60    2.20
   4  -2   4   28.70    2.40
  -5   2  -4   62.29    3.30
   5  -2   4   60.79    3.40
  -6   2  -4   51.49    3.10
   6  -2   4   50.29    3.10
   7   1  -4   74.09    3.60
  -7  -1   4   71.69    3.90
   6   1  -4   36.70    2.50
  -6  -1   4   40.00    2.90
   5   1  -4   75.39    3.30
  -5  -1   4   73.79    3.70
   4   1  -4  511.75   18.30
  -4  -1   4  475.65   18.20
  -4  -1   4  514.15   18.40
   3   1  -4  516.95   18.60
  -3  -1   4  505.65   18.70
   2   1  -4 1048.60   38.20
   2   1  -4  964.10   38.30
   2   1  -4 1091.39   38.30
  -2  -1   4 1140.09   38.40
  -2  -1   4 1053.69   38.30
   1   1  -4 1433.46   52.99
   1   1  -4 1454.05   52.99
  -1  -1   4 1501.45   53.09
  -1  -1   4 1490.65   52.99
   0   1  -4 1558.34   56.69
   0   1  -4 1555.74   56.69
   0  -1   4 1599.14   56.69
   0  -1   4 1578.64   56.69
  -1   1  -4 3586.04  124.79
  -1   1  -4 3144.69  124.59
   1  -1   4 3814.72  124.89
   1  -1   4 3296.17  124.59
  -2   1  -4 2639.14   95.09
   2  -1   4 2639.44   95.19
  -3   1  -4   49.20    2.30
   3  -1   4   47.50    2.50
  -4   1  -4  277.97   10.50
   4  -1   4  281.37   10.50
  -5   1  -4  263.67   10.10
  -6   1  -4   64.39    3.40
   6  -1   4   62.19    3.40
   7   0  -4  230.88    8.80
  -7   0   4  215.38    8.90
  -6   0   4    0.10    1.70
   5   0  -4   -0.20    1.10
  -5   0   4   -2.20    1.40
   4   0  -4   12.10    1.40
  -4   0   4   10.30    0.90
  -4   0   4   12.60    1.80
   3   0  -4   52.39    2.50
  -3   0   4   56.59    2.80
   2   0  -4  729.73   26.50
   2   0  -4  745.03   26.40
  -2   0   4  756.82   26.50
  -2   0   4  688.13   26.40
   0   0  -4 2254.57   79.09
   0   0  -4 2464.95   79.29
   0   0   4 2014.30   78.99
   0   0   4 2043.80   78.99
  -1   0  -4  428.16   15.60
   1   0   4  426.76   15.60
   1   0   4  435.56   15.60
  -2   0  -4  209.78    7.80
   2   0   4  212.88    7.90
  -3   0  -4  133.39    5.20
   3   0   4  134.49    5.20
  -4   0  -4   13.50    1.60
   4   0   4   10.50    1.70
   5   0   4  651.63   23.90
  -6   0  -4  131.49    5.50
   6   0   4  136.29    5.60
   7  -1  -4   70.29    3.60
  -7   1   4   70.89    3.90
   6  -1  -4   44.20    2.80
  -6   1   4   45.30    3.00
   5  -1  -4   79.39    3.60
  -5   1   4   78.09    3.80
   4  -1  -4  485.85   18.00
  -4   1   4  502.25   18.10
   3  -1  -4  485.55   17.80
  -3   1   4  495.35   17.90
   2  -1  -4 1044.90   37.40
   2  -1  -4 1043.50   37.40
  -2   1   4 1035.10   37.40
  -2   1   4 1017.60   37.40
   1  -1  -4 1442.66   51.39
   1  -1  -4 1391.96   51.39
   1  -1  -4 1478.85   51.39
  -1   1   4 1414.46   51.39
  -1   1   4 1402.16   51.39
   0   1   4 1580.14   56.89
   0   1   4 1582.34   56.99
  -1  -1  -4 5077.09  171.68
  -1  -1  -4 4798.42  171.78
   1   1   4 4423.56  171.78
  -2  -1  -4 3595.44  122.09
   2   1   4 3171.18  122.09
  -3  -1  -4   45.50    2.00
  -3  -1  -4   49.40    2.20
  -4  -1  -4  268.47   10.20
   4   1   4  279.47   10.20
  -5  -1  -4  266.27   10.10
   5   1   4  271.57   10.20
  -6  -1  -4   65.29    3.10
   6   1   4   62.19    3.30
   7  -2  -4    4.40    1.50
  -7   2   4    7.80    1.80
   6  -2  -4    2.50    1.40
  -6   2   4    5.40    1.50
   5  -2  -4   33.50    2.40
  -5   2   4   36.80    2.70
   4  -2  -4   81.49    3.50
  -4   2   4   81.59    3.60
   3  -2  -4  236.28    8.50
   3  -2  -4  215.68    8.60
  -3   2   4  234.68    8.60
   2  -2  -4  246.88    8.80
   2  -2  -4  237.88    8.80
  -2   2   4  235.08    8.80
  -2   2   4  233.68    8.70
   1  -2  -4  580.24   20.00
  -1   2   4  541.95   19.90
  -1   2   4  536.25   20.00
  -1   2   4  548.25   20.00
   0  -2  -4 1633.54   58.89
   2   2   4   11.70    1.10
  -3  -2  -4  170.48    6.50
  -3  -2  -4  181.08    6.50
   3   2   4  173.78    6.60
  -4  -2  -4   30.90    1.80
   4   2   4   29.90    1.90
  -5  -2  -4   58.49    2.70
   5   2   4   59.49    2.90
  -6  -2  -4   50.29    2.60
   6   2   4   51.39    3.00
   6  -3  -4   16.50    2.20
  -6   3   4   24.10    2.40
  -5   3   4   25.40    2.40
   4  -3  -4   66.79    3.10
  -4   3   4   61.89    3.10
   3  -3  -4    5.80    0.90
   3  -3  -4    7.50    1.20
  -3   3   4    5.30    1.00
  -3   3   4    6.50    1.00
   2  -3  -4  260.67    9.00
   2  -3  -4  248.18    9.10
  -2   3   4  237.88    9.10
  -2   3   4  236.08    9.00
   1  -3  -4  224.38    7.80
  -1   3   4  199.18    7.60
  -1   3   4  200.98    7.70
  -1   3   4  209.28    7.80
   0   3   4  266.77   10.00
   2   3   4  457.65   16.60
   3   3   4    4.30    0.90
   4   3   4   14.90    1.40
  -5  -3  -4  205.78    7.70
   5   3   4  207.88    7.80
   6  -4  -4  127.29    5.40
  -6   4   4  130.29    5.50
   5  -4  -4   59.89    3.20
  -5   4   4   60.99    3.20
   4  -4  -4  289.07   10.70
  -4   4   4  282.97   10.80
   3  -4  -4  160.38    6.60
   3  -4  -4  184.68    6.70
  -3   4   4  181.78    6.70
  -2   4   4  179.38    6.80
  -2   4   4  178.18    6.70
  -1   4   4  662.33   24.10
   0   4   4    3.80    0.90
   1   4   4  220.88    8.30
   3   4   4   13.60    1.00
   6  -5  -4   -0.10    1.60
  -6   5   4    4.70    1.30
   5  -5  -4   73.49    3.50
   4  -5  -4  721.83   25.40
  -4   5   4  689.73   25.40
  -4   5   4  680.73   25.50
  -3   5   4  295.97   10.90
  -3   5   4  289.77   10.90
  -2   5   4   57.69    2.50
  -2   5   4   59.29    2.80
  -1   5   4   60.69    2.90
   0   5   4   70.49    3.20
   1   5   4   17.30    1.90
  -3   6   4   39.10    2.60
  -2   6   4   93.59    4.10
  -1   6   4  211.38    8.20
   0   6   4  509.15   18.80
   1   6   4  197.78    7.80
   2   6   4  320.37   12.10
  -1   7   4    3.50    1.50
   0   7   4    9.10    2.10
   1   7   4   13.60    2.10
   2   7   4   34.50    2.70
  -2   8   4    4.70    1.40
  -1   8   4   77.59    3.90
   0   8   4    7.40    1.60
   1   8   4   65.19    3.60
   2   8   4   81.19    4.00
   2   8  -5    0.70    1.70
   1   8  -5   73.69    4.00
   0   8  -5    2.50    1.70
  -1   8  -5   92.79    4.80
   4   7  -5   49.90    3.10
   3   7  -5    3.20    1.40
   2   7  -5    8.00    1.70
   1   7  -5   19.30    2.40
   0   7  -5   17.10    2.50
   0   7  -5   15.60    1.50
   0  -7   5   17.80    1.70
  -1   7  -5    8.90    1.40
  -1   7  -5   10.30    2.40
   1  -7   5    9.80    1.70
   2  -7   5    0.80    1.50
   3  -7   5    5.80    1.70
   5   6  -5    4.20    1.20
   4   6  -5   27.80    2.10
   4   6  -5   19.90    2.30
   3   6  -5   26.80    1.80
   3   6  -5   24.80    2.20
  -3  -6   5   26.80    1.80
   2   6  -5  261.47   10.00
  -2  -6   5  275.27   10.00
   1   6  -5   76.19    3.40
   1   6  -5   78.59    4.40
  -1  -6   5   83.69    3.60
   0   6  -5    3.70    0.90
   0  -6   5    3.10    1.40
  -1   6  -5  448.86   16.70
   1  -6   5  459.55   16.90
  -3   6  -5   20.80    2.10
   3  -6   5   15.10    2.40
  -4   6  -5  223.48    8.70
   6   5  -5  132.39    5.30
  -5  -5   5   28.10    2.20
   4   5  -5  643.84   23.30
   4   5  -5  605.54   23.20
  -4  -5   5  655.93   23.20
   3   5  -5   99.69    4.30
   3   5  -5   95.59    4.10
  -3  -5   5  105.39    4.30
   2   5  -5   22.00    2.20
   2   5  -5   19.70    1.60
  -2  -5   5   20.50    2.10
   1   5  -5   22.40    2.30
   1   5  -5   26.20    1.60
  -1  -5   5   20.80    2.10
  -1  -5   5   21.90    1.20
   0   5  -5  109.29    4.50
   0  -5   5  119.89    4.90
  -1   5  -5 1206.08   44.30
   1  -5   5 1237.78   44.40
  -2   5  -5 1035.00   38.10
   2  -5   5 1058.39   38.20
  -3   5  -5   23.00    2.20
   3  -5   5   15.00    2.60
  -4   5  -5    0.20    1.30
   4  -5   5    0.80    1.70
  -5   5  -5   24.90    2.50
   6   4  -5    3.70    1.10
   5   4  -5   17.00    1.80
  -5  -4   5   21.40    2.30
   4   4  -5  314.67   11.70
   4   4  -5  309.37   11.70
  -4  -4   5  316.07   11.80
   3   4  -5  268.57   10.10
   3   4  -5  268.67   10.20
  -3  -4   5  276.37   10.20
   2   4  -5   81.79    3.60
   2   4  -5   80.59    3.40
  -2  -4   5   87.39    3.70
   1   4  -5  476.45   17.40
  -1  -4   5  427.36   17.60
  -1  -4   5  524.95   17.50
   0   4  -5  694.73   26.30
   0  -4   5  753.42   26.40
   1  -4   5  109.59    4.60
  -2   4  -5  233.28    8.90
   2  -4   5  237.48    9.10
  -3   4  -5  103.99    4.50
   3  -4   5  105.49    4.70
  -4   4  -5  141.79    5.70
   4  -4   5  133.49    5.90
  -5   4  -5    2.60    1.40
   5  -4   5    0.20    1.60
   6   3  -5   76.99    3.50
  -6  -3   5   71.49    3.70
   5   3  -5   61.49    3.00
   4   3  -5  547.75   20.00
   4   3  -5  558.34   20.00
  -4  -3   5  538.85   20.20
   3   3  -5   48.80    2.30
   3   3  -5   50.89    2.40
  -3  -3   5   49.70    2.70
   2   3  -5  195.08    7.40
   2   3  -5  191.78    7.40
  -2  -3   5  199.88    7.50
  -1  -3   5  895.91   31.40
  -1  -3   5  831.02   31.30
   0   3  -5  233.28    9.00
   0  -3   5  243.38    9.10
   1  -3   5  150.88    6.00
  -2   3  -5  203.38    7.90
   2  -3   5  212.38    8.00
  -3   3  -5  128.59    5.40
   3  -3   5  135.99    5.50
  -5   3  -5   35.20    2.60
   5  -3   5   27.60    2.80
  -6   3  -5    8.40    1.50
   6  -3   5    6.10    1.90
   7   2  -5  117.29    4.90
  -7  -2   5  112.89    5.20
   6   2  -5   -1.00    1.10
  -6  -2   5   -1.90    1.60
   5   2  -5   15.70    1.80
  -5  -2   5   15.90    2.80
   4   2  -5  406.26   14.70
  -4  -2   5  395.76   14.90
   3   2  -5  347.77   12.80
   3   2  -5  347.17   12.70
  -3  -2   5  347.77   12.90
   2   2  -5  553.84   20.30
   2   2  -5  561.64   20.30
  -2  -2   5  558.44   20.40
   1   2  -5  404.16   14.80
  -1  -2   5  414.76   15.10
  -1  -2   5  398.16   14.80
   0   2  -5  371.36   13.60
   1  -2   5 1179.48   42.70
  -2   2  -5    0.80    0.90
   2  -2   5    0.90    1.10
  -3   2  -5  115.59    4.70
   3  -2   5  116.89    4.80
  -4   2  -5  262.57   10.20
   4  -2   5  277.17   10.30
  -5   2  -5   11.90    2.10
   5  -2   5   11.10    1.80
  -6   2  -5    0.70    1.30
   6  -2   5    0.90    1.60
   7   1  -5   74.89    3.60
  -7  -1   5   69.89    4.00
   6   1  -5   31.80    2.30
  -6  -1   5   29.40    2.80
   5   1  -5  149.79    5.80
  -5  -1   5  145.79    6.10
   4   1  -5  595.34   21.50
  -4  -1   5  582.34   21.60
   3   1  -5 1538.35   56.89
   3   1  -5 1600.04   56.99
  -3  -1   5 1596.54   57.09
   2   1  -5  133.09    5.00
  -2  -1   5  132.39    5.30
   1   1  -5  841.02   31.50
   1   1  -5  860.91   31.50
  -1  -1   5  899.71   31.60
  -1  -1   5  880.81   31.50
   0   1  -5  774.52   28.50
   0   1  -5  798.32   28.50
   0  -1   5  798.12   28.60
   0  -1   5  784.02   28.50
  -1   1  -5  199.08    7.50
  -1   1  -5  196.68    7.50
   1  -1   5  210.28    7.70
  -2   1  -5  236.58    8.90
   2  -1   5  241.08    9.00
  -3   1  -5  120.19    4.90
   3  -1   5  125.09    4.90
  -4   1  -5  719.23   26.50
   4  -1   5  732.43   26.50
  -5   1  -5  109.39    4.80
  -6   1  -5  162.38    6.60
   6  -1   5  160.88    6.60
   7   0  -5  477.35   17.20
  -7   0   5  446.26   17.30
   6   0  -5  245.68    9.30
  -6   0   5  237.48    9.40
   5   0  -5  238.68    8.90
  -5   0   5  230.18    9.00
   4   0  -5   41.40    2.10
  -4   0   5   39.40    2.40
   3   0  -5 1451.45   52.59
  -3   0   5 1461.35   52.69
   2   0  -5  223.68    9.20
   2   0  -5  240.48    9.00
  -2   0   5  262.47    9.10
   1   0  -5 7394.96  256.27
   1   0  -5 7301.37  256.47
  -1   0   5 7596.44  256.57
  -1   0   5 6156.88  256.07
   0   0  -5  290.27   10.40
   0   0  -5  281.97   10.40
   0   0   5  285.07   10.40
   0   0   5  287.37   10.50
  -1   0  -5    4.30    0.70
  -1   0  -5    3.70    0.70
   1   0   5    5.10    1.00
   1   0   5    4.60    0.80
  -2   0  -5  136.59    5.20
  -2   0  -5  130.09    5.10
   2   0   5  138.39    5.30
  -3   0  -5  555.64   20.00
   3   0   5  542.15   20.00
  -4   0  -5  196.48    7.50
   4   0   5  190.68    7.50
  -5   0  -5   99.59    4.70
   5   0   5  106.89    4.60
  -6   0  -5    7.40    1.30
   6   0   5    6.80    1.50
   7  -1  -5   76.19    3.80
  -7   1   5   74.89    4.00
   6  -1  -5   33.80    2.50
  -6   1   5   32.20    2.80
   5  -1  -5  153.68    5.90
  -5   1   5  145.39    6.10
   4  -1  -5  566.34   20.80
  -4   1   5  576.84   20.90
   3  -1  -5 1594.74   57.49
  -3   1   5 1590.64   57.49
   2  -1  -5  113.19    4.70
   2  -1  -5  121.29    4.60
  -2   1   5  126.19    4.80
   1  -1  -5  892.31   31.60
   1  -1  -5  862.71   31.50
  -1   1   5  880.61   31.60
  -1   1   5  857.21   31.50
   0  -1  -5  786.22   28.60
   0  -1  -5  811.92   28.60
   0   1   5  773.62   28.60
   0   1   5  803.42   28.70
  -1  -1  -5  210.88    7.60
  -1  -1  -5  208.38    7.60
   1   1   5  211.98    7.70
   1   1   5  202.88    7.70
  -2  -1  -5  236.78    8.70
   2   1   5  239.98    8.80
  -3  -1  -5  111.29    4.40
  -3  -1  -5  121.39    4.60
   3   1   5  118.89    4.60
  -4  -1  -5  706.23   26.00
   4   1   5  720.23   26.00
  -5  -1  -5  106.59    4.40
   5   1   5  103.29    4.50
  -6  -1  -5  162.98    6.60
   6   1   5  170.98    6.70
   7  -2  -5  117.69    5.00
  -7   2   5  115.19    5.20
  -6   2   5   -0.80    1.50
   5  -2  -5   16.70    2.20
  -5   2   5   12.80    2.30
   4  -2  -5  389.56   14.20
  -4   2   5  380.26   14.20
   3  -2  -5  299.17   12.00
   3  -2  -5  347.97   12.00
  -3   2   5  331.57   12.10
   2  -2  -5  517.15   18.90
   2  -2  -5  563.74   18.90
  -2   2   5  517.95   18.90
  -2   2   5  477.55   18.80
   1  -2  -5  405.96   14.20
  -1   2   5  383.96   14.20
  -1   2   5  384.06   14.20
   0  -2  -5  393.66   14.40
   2   2   5    1.20    0.60
  -3  -2  -5  114.29    4.30
   3   2   5  113.69    4.40
  -4  -2  -5  262.67    9.70
   4   2   5  260.67    9.80
  -5  -2  -5    9.90    1.50
   5   2   5    7.70    1.60
  -6  -2  -5    1.00    1.00
   6   2   5   -0.20    1.20
   6  -3  -5   72.19    3.60
  -6   3   5   76.39    3.80
  -5   3   5   61.89    3.30
   4  -3  -5  545.25   19.10
  -4   3   5  502.45   18.90
  -4   3   5  517.95   19.20
   3  -3  -5   47.50    2.10
   3  -3  -5   42.60    2.10
  -3   3   5   44.90    1.90
  -3   3   5   44.00    3.50
   2  -3  -5  176.48    6.60
   2  -3  -5  188.18    6.60
  -2   3   5  174.78    6.60
  -2   3   5  174.78    6.70
  -1   3   5  767.42   28.70
  -1   3   5  822.12   28.80
  -1   3   5  799.72   28.80
   2   3   5  192.28    7.10
   3   3   5  122.89    4.70
   4   3   5  386.46   14.20
  -5  -3  -5   30.20    1.60
   5   3   5   29.10    1.90
   6  -4  -5   -0.60    1.40
  -6   4   5    2.00    1.40
   5  -4  -5   16.10    2.10
  -5   4   5   20.00    2.10
   4  -4  -5  304.07   10.60
  -4   4   5  259.37   10.60
  -4   4   5  288.37   10.70
   3  -4  -5  270.07    9.60
   3  -4  -5  251.37   10.00
  -3   4   5  260.77    9.70
  -2   4   5   77.99    3.10
  -2   4   5   74.29    3.30
  -1   4   5  492.05   18.00
   0   4   5  702.83   25.60
   3   4   5   90.99    3.50
   5  -5  -5   20.90    1.90
   4  -5  -5  623.34   22.00
  -4   5   5  580.14   22.00
  -3   5   5   97.19    4.00
  -3   5   5   99.69    4.10
  -2   5   5   17.80    1.80
  -2   5   5   21.10    1.30
  -1   5   5   22.00    1.80
   0   5   5  115.19    4.70
   1   5   5 1167.08   42.30
  -3   6   5   28.70    2.10
  -2   6   5  252.77    9.60
  -1   6   5   76.79    3.60
   0   6   5    4.40    1.40
  -3   7   5    3.50    1.40
  -1   7   5   15.70    2.20
   0   7   5   18.40    2.20
   1   7   5    8.90    2.10
  -2   8   5   -1.50    1.30
  -1   8   5   74.79    3.80
   0   8   5    2.00    1.50
   1   8   5   83.79    4.10
   1   8  -6    0.70    1.80
   0   8  -6   11.10    2.50
  -1   8  -6   80.39    4.40
   3   7  -6    0.50    1.40
   2   7  -6  111.19    5.00
   1   7  -6   78.09    3.40
   1   7  -6   76.09    4.00
  -1  -7   6   77.49    3.40
   0   7  -6   95.59    3.90
   0   7  -6   99.79    4.60
   0  -7   6   85.59    4.00
  -1   7  -6  174.28    6.70
   1  -7   6  168.98    6.90
  -2   7  -6   22.60    1.80
   2  -7   6   20.70    2.50
   3  -7   6    4.80    1.90
   5   6  -6   90.49    3.90
   4   6  -6  274.07   10.20
   4   6  -6  257.77    9.90
  -4  -6   6  259.87   10.10
   3   6  -6    4.40    0.90
   3   6  -6    2.60    1.40
  -3  -6   6    3.80    1.20
   2   6  -6   29.70    1.90
  -2  -6   6   29.30    2.20
   1   6  -6  208.18    8.10
  -1  -6   6  219.68    8.30
   0   6  -6   50.09    2.40
   0  -6   6   47.20    3.00
  -1   6  -6  308.77   11.50
   1  -6   6  304.57   11.70
   2  -6   6  281.17   10.90
  -3   6  -6  102.39    4.60
   3  -6   6  101.09    4.70
  -4   6  -6   98.19    4.40
   4  -6   6   90.59    4.80
   5   5  -6   54.59    3.00
  -5  -5   6   50.39    2.90
   4   5  -6  362.86   13.80
   4   5  -6  382.66   13.90
   3   5  -6  122.09    5.00
   3   5  -6  129.09    5.20
  -3  -5   6  127.29    5.30
   2   5  -6  109.69    4.50
   2   5  -6  115.19    4.80
  -2  -5   6  108.69    4.80
   1   5  -6   23.50    2.40
  -1  -5   6   25.30    2.40
   0   5  -6   85.39    3.70
   0  -5   6   90.79    4.20
  -1   5  -6 1145.09   42.00
   1  -5   6 1172.28   42.20
   2  -5   6  174.28    7.20
   3  -5   6   27.50    2.80
  -4   5  -6   24.90    2.30
   4  -5   6   22.60    2.70
  -5   5  -6   15.40    2.30
   5  -5   6   14.90    2.60
   6   4  -6   63.99    3.10
  -6  -4   6   60.29    3.40
  -5  -4   6  179.58    7.20
   4   4  -6  172.58    6.70
   4   4  -6  177.98    6.70
  -4  -4   6  168.48    6.90
   3   4  -6   10.50    1.70
   3   4  -6   11.90    1.70
  -3  -4   6   13.00    2.20
   2   4  -6  263.47    9.90
   2   4  -6  262.97    9.80
  -2  -4   6  264.77   10.00
   1   4  -6  283.37   10.70
  -1  -4   6  292.07   10.80
   0   4  -6  303.27   11.70
   0  -4   6  331.67   12.00
  -1   4  -6   45.10    2.30
   1  -4   6   43.60    2.80
  -2   4  -6    8.40    1.70
   2  -4   6    5.80    1.70
  -3   4  -6   14.50    2.00
  -4   4  -6   91.09    4.10
   4  -4   6   82.59    4.40
  -5   4  -6    0.80    1.40
   5  -4   6    3.50    1.80
   6   3  -6   76.09    3.50
  -6  -3   6   75.69    3.90
   5   3  -6   40.10    2.30
  -5  -3   6   36.20    2.90
   4   3  -6    0.00    1.00
   4   3  -6    0.40    0.80
  -4  -3   6   -0.50    1.50
   3   3  -6   38.50    2.00
   3   3  -6   37.90    2.10
  -3  -3   6   36.80    2.50
   2   3  -6  541.45   20.50
   2   3  -6  571.54   20.50
  -2  -3   6  574.64   20.60
   1   3  -6  197.68    7.70
  -1  -3   6  214.68    8.00
   0   3  -6   61.99    2.90
   0  -3   6   69.49    3.30
  -1   3  -6   80.69    3.40
   1  -3   6   83.69    3.70
  -2   3  -6  112.89    4.70
   2  -3   6  117.89    4.90
  -3   3  -6   33.70    2.30
   3  -3   6   34.90    2.70
  -4   3  -6    4.90    1.70
   4  -3   6    1.20    1.80
  -5   3  -6   54.79    3.10
   5  -3   6   51.39    3.30
   6  -3   6   17.80    2.40
   7   2  -6    0.10    1.30
  -7  -2   6    2.10    1.70
   6   2  -6   20.60    2.00
  -6  -2   6   19.60    2.50
   5   2  -6   13.50    1.90
   4   2  -6   64.19    2.90
   4   2  -6   60.39    2.60
  -4  -2   6   63.39    3.30
   3   2  -6  323.77   11.90
   3   2  -6  319.17   12.00
  -3  -2   6  329.37   12.10
   2   2  -6  263.97   10.20
  -2  -2   6  287.17   10.40
   1   2  -6 1029.30   38.40
  -1  -2   6 1095.69   38.60
   0   2  -6  220.18    8.40
   0  -2   6  224.58    8.50
  -1   2  -6  236.88    9.10
   1  -2   6  249.38    9.30
  -2   2  -6  128.79    5.20
   2  -2   6  136.49    5.30
  -3   2  -6   89.49    3.90
   3  -2   6   88.29    4.00
  -4   2  -6   55.19    3.00
   4  -2   6   52.09    3.10
  -5   2  -6   42.90    2.80
   5  -2   6   42.30    2.90
  -6   2  -6   59.79    3.30
   6  -2   6   58.69    3.60
   7   1  -6  312.67   11.30
  -7  -1   6  279.97   11.40
   6   1  -6   38.30    2.50
  -6  -1   6   36.80    2.90
   5   1  -6   59.29    2.90
  -5  -1   6   57.99    3.30
   4   1  -6   34.00    2.10
  -4  -1   6   31.30    2.40
   3   1  -6  382.86   14.30
   3   1  -6  400.06   14.40
  -3  -1   6  398.46   14.50
   2   1  -6  575.84   21.70
  -2  -1   6  618.94   21.80
   1   1  -6 1615.74   62.09
  -1  -1   6 1827.12   62.19
   0   1  -6   72.59    3.10
   0   1  -6   73.69    3.30
   0  -1   6   78.39    3.40
  -1   1  -6 2726.53   99.89
  -1   1  -6 2815.52   99.89
  -2   1  -6  598.84   22.30
   2  -1   6  627.44   22.40
  -3   1  -6   98.39    4.10
   3  -1   6  100.59    4.20
  -4   1  -6   95.69    4.20
   4  -1   6   93.59    4.30
  -5   1  -6   67.89    3.40
   5  -1   6   66.59    3.50
  -6   1  -6   33.60    2.50
   6  -1   6   23.00    2.60
   7   0  -6   11.20    2.40
  -7   0   6   16.30    2.90
   6   0  -6   20.60    2.10
  -6   0   6   21.10    2.70
   5   0  -6   40.90    2.40
  -5   0   6   38.20    2.80
   4   0  -6    2.70    0.90
  -4   0   6    4.10    1.20
   3   0  -6  165.98    6.40
  -3   0   6  171.48    6.60
   2   0  -6 1033.80   38.90
   2   0  -6 1113.19   38.80
   1   0  -6   68.59    2.90
   1   0  -6   70.89    2.90
  -1   0   6   66.29    2.80
  -1   0   6   74.09    3.20
   0   0  -6  163.58    6.20
   0   0  -6  168.78    6.20
   0   0   6  160.08    6.10
   0   0   6  168.58    6.30
  -1   0  -6  144.49    5.50
  -1   0  -6  143.19    5.40
   1   0   6  146.49    5.60
  -2   0  -6   78.79    3.10
  -3   0  -6  465.15   17.00
   3   0   6  465.15   17.00
  -4   0  -6 3903.51  141.69
   4   0   6 3954.90  141.69
  -5   0  -6   74.99    3.50
  -6   0  -6  153.88    6.30
   6   0   6  161.78    6.50
   7  -1  -6  315.97   11.80
  -7   1   6  302.67   12.00
   6  -1  -6   40.10    2.60
  -6   1   6   38.50    3.00
   5  -1  -6   57.69    2.90
  -5   1   6   56.19    3.20
   4  -1  -6   28.40    1.90
  -4   1   6   30.70    2.20
   3  -1  -6  367.36   13.60
  -3   1   6  377.56   13.80
   2  -1  -6  552.24   20.50
   2  -1  -6  567.84   20.40
  -2   1   6  571.34   20.60
   1  -1  -6 1730.63   61.79
   1  -1  -6 1736.93   61.69
  -1   1   6 1604.24   61.69
  -1   1   6 1779.42   61.79
   0  -1  -6   76.59    2.90
   0  -1  -6   74.29    2.90
   0   1   6   78.39    3.10
   0   1   6   72.29    3.00
  -1  -1  -6 3276.57  110.79
   1   1   6 2868.21  110.59
  -2  -1  -6  580.24   21.90
  -2  -1  -6  625.64   22.00
   2   1   6  612.54   22.00
  -3  -1  -6   91.09    3.70
  -3  -1  -6   99.49    3.90
   3   1   6   99.89    3.90
  -4  -1  -6   95.79    4.00
   4   1   6   94.99    4.10
   5   1   6   70.19    3.50
  -6  -1  -6   26.50    2.10
   6   1   6   29.00    2.40
  -7   2   6    0.70    1.70
   6  -2  -6   19.50    2.20
  -6   2   6   23.10    2.50
   5  -2  -6   11.20    2.30
  -5   2   6   13.30    2.20
   4  -2  -6   60.29    2.90
  -4   2   6   61.39    3.10
   3  -2  -6  306.57   11.30
  -3   2   6  309.17   11.40
   2  -2  -6  262.37    9.70
  -2   2   6  261.77    9.70
   1  -2  -6  965.10   34.40
  -1   2   6  957.00   34.40
  -1   2   6  935.91   34.40
   0   2   6  216.08    7.80
   0   2   6  209.48    7.80
   1   2   6  236.38    8.70
   2   2   6  126.39    4.80
  -3  -2  -6   84.39    3.20
   4   2   6   55.39    2.70
  -5  -2  -6   38.90    2.10
   5   2   6   40.20    2.30
  -6  -2  -6   60.59    2.70
   6   2   6   56.69    3.00
   6  -3  -6   72.59    3.60
  -6   3   6   75.29    3.80
   5  -3  -6   28.60    2.70
  -5   3   6   35.70    2.60
  -4   3   6   -1.40    1.10
   3  -3  -6   38.60    1.90
   3  -3  -6   33.50    1.80
  -3   3   6   31.80    1.60
  -3   3   6   36.80    2.10
  -2   3   6  482.85   18.00
  -2   3   6  506.65   18.00
  -1   3   6  184.18    6.60
  -1   3   6  173.78    6.50
   2   3   6  104.59    4.00
   3   3   6   33.20    1.70
   4   3   6    3.30    0.80
   6  -4  -6   57.49    3.10
  -6   4   6   63.19    3.30
   5  -4  -6  185.88    7.10
  -5   4   6  173.58    7.10
   4  -4  -6  160.78    6.20
  -4   4   6  157.88    6.30
   3  -4  -6    6.00    1.20
  -3   4   6    8.10    1.50
  -2   4   6  243.28    8.90
  -2   4   6  237.48    8.90
  -1   4   6  275.77   10.20
   5  -5  -6   39.80    2.30
   4  -5  -6  365.76   13.10
  -4   5   6  348.57   13.30
  -3   5   6  128.09    4.90
  -3   5   6  121.79    4.90
  -2   5   6   99.49    3.90
  -2   5   6  101.19    4.20
  -1   5   6   22.40    1.90
   0   5   6   88.39    3.90
  -3   6   6    7.90    1.60
  -2   6   6   25.50    2.10
  -1   6   6  199.38    7.70
   0   6   6   50.99    2.90
  -1   7   6   73.09    3.60
   0   7   6   91.29    4.20
  -1   8   6   -1.40    1.40
   0   8   6    9.90    2.10
   0   8  -7    0.00    1.60
   3   7  -7   17.80    2.30
   2   7  -7   28.20    2.20
   2   7  -7   22.60    2.60
   1   7  -7  110.39    5.20
   1   7  -7  116.69    4.60
   0   7  -7    0.40    1.10
   0   7  -7    0.10    1.60
   0  -7   7    0.40    1.40
  -1   7  -7   34.70    2.20
   1  -7   7   30.60    2.70
  -2   7  -7   46.80    2.40
   2  -7   7   39.90    3.10
   4   6  -7  246.48    9.60
  -4  -6   7  253.47    9.50
   3   6  -7    6.90    1.40
   3   6  -7    5.20    1.40
   2   6  -7   97.79    4.10
   2   6  -7   97.59    4.50
  -2  -6   7   99.39    4.40
   1   6  -7    2.20    1.00
   1   6  -7    0.60    1.70
  -1  -6   7    4.10    1.60
   0   6  -7   54.99    2.70
   0  -6   7   52.79    3.20
  -1   6  -7  105.49    4.30
   1  -6   7   96.09    4.80
  -2   6  -7   56.69    2.90
   2  -6   7   59.39    3.50
   3  -6   7   16.60    2.70
  -4   6  -7   10.70    1.60
   4  -6   7   10.60    2.30
   5   5  -7  138.49    5.50
  -5  -5   7  133.19    5.70
   4   5  -7   10.10    1.90
   4   5  -7   12.70    1.70
  -4  -5   7   14.70    2.30
   3   5  -7   10.10    1.90
   3   5  -7   11.00    1.70
  -3  -5   7   11.70    2.20
   2   5  -7    2.20    1.30
   2   5  -7    3.30    1.00
  -2  -5   7    4.20    1.60
   1   5  -7  312.97   11.60
  -1  -5   7  308.27   11.80
   0   5  -7   37.40    2.20
   0  -5   7   36.20    2.90
  -1   5  -7    8.30    1.20
   1  -5   7    5.80    2.10
   2  -5   7   70.19    4.40
   3  -5   7   61.49    3.70
   4  -5   7    1.90    2.00
   6   4  -7  140.59    5.70
  -6  -4   7  137.69    5.90
   5   4  -7   57.29    2.90
   5   4  -7   64.59    3.10
  -5  -4   7   61.29    3.50
   4   4  -7   66.39    3.10
   4   4  -7   67.79    3.20
   3   4  -7  123.09    4.90
   3   4  -7  121.79    4.90
  -3  -4   7  119.69    5.30
   2   4  -7   73.79    3.30
   2   4  -7   73.49    3.40
  -2  -4   7   73.69    3.70
   1   4  -7   87.19    3.80
  -1  -4   7   93.69    4.20
   0   4  -7   46.80    2.40
   0  -4   7   45.40    3.00
  -1   4  -7 1332.17   48.90
   1  -4   7 1365.36   49.00
   2  -4   7  152.28    6.40
   3  -4   7   33.40    2.90
  -4   4  -7  378.96   14.10
   4  -4   7  367.56   14.20
  -5   4  -7   25.80    2.40
   6   3  -7   14.80    1.90
  -6  -3   7   14.90    2.60
  -5  -3   7   31.00    2.80
   4   3  -7  150.98    5.80
   4   3  -7  152.88    6.00
  -4  -3   7  147.09    6.20
   3   3  -7    2.40    1.00
   3   3  -7    1.40    0.80
  -3  -3   7    3.10    1.50
   2   3  -7  422.06   16.10
  -2  -3   7  456.25   16.30
   1   3  -7    2.40    0.90
  -1  -3   7    2.30    1.30
   0   3  -7   23.80    1.70
   0  -3   7   24.90    2.20
  -1   3  -7   38.40    2.10
   1  -3   7   42.30    2.50
   2  -3   7  176.48    7.10
  -3   3  -7  179.78    7.10
   3  -3   7  180.88    7.20
  -4   3  -7  258.57    9.80
   4  -3   7  248.28    9.90
  -5   3  -7   61.79    3.20
   5  -3   7   52.19    3.40
   7   2  -7   61.99    3.30
  -7  -2   7   66.39    3.40
   6   2  -7   89.09    3.90
  -6  -2   7   81.99    4.30
  -5  -2   7    3.30    1.70
   4   2  -7  107.49    4.40
   4   2  -7  104.19    4.10
  -4  -2   7  110.69    4.80
   3   2  -7  106.19    4.30
   3   2  -7  105.19    4.20
  -3  -2   7  111.29    4.60
   2   2  -7  439.66   16.70
  -2  -2   7  471.55   16.80
   1   2  -7  223.48    8.70
  -1  -2   7  240.38    8.90
   0   2  -7    7.40    1.50
   0  -2   7    6.10    1.30
  -1   2  -7 1115.69   41.40
   1  -2   7 1170.28   41.50
   2  -2   7  224.78    8.60
  -3   2  -7   49.30    2.70
   3  -2   7   53.19    2.90
  -4   2  -7   12.40    2.40
  -5   2  -7   61.39    3.30
   5  -2   7   61.39    3.50
   6  -2   7   16.20    2.10
   7   1  -7   47.10    2.80
  -7  -1   7   37.90    3.10
   6   1  -7   16.10    1.90
  -6  -1   7   14.10    2.50
   5   1  -7   51.09    2.90
   4   1  -7  468.85   17.40
  -4  -1   7  480.65   17.60
   3   1  -7   87.29    3.60
   3   1  -7   87.69    3.40
  -3  -1   7   89.99    4.00
   2   1  -7 1270.17   47.90
  -2  -1   7 1379.06   48.00
   1   1  -7  266.37   10.20
  -1  -1   7  288.27   10.50
   0   1  -7  290.37   11.60
   0   1  -7  330.97   11.50
   0  -1   7  315.37   11.80
  -1   1  -7  561.34   20.90
   1  -1   7  584.94   21.00
   2  -1   7  158.48    6.20
  -3   1  -7  114.19    4.70
   3  -1   7  117.99    4.90
  -4   1  -7  595.64   22.60
   4  -1   7  633.34   22.60
  -5   1  -7   20.20    2.20
   5  -1   7   15.50    2.40
  -6   1  -7    1.40    1.30
   6  -1   7    0.50    1.60
   7   0  -7  261.77    9.80
  -7   0   7  243.58   10.00
   6   0  -7   68.79    3.30
  -6   0   7   65.59    3.60
   5   0  -7    7.10    1.30
  -5   0   7    6.60    1.60
   4   0  -7  187.98    7.20
  -4   0   7  191.18    7.40
   3   0  -7  113.09    4.60
  -3   0   7  120.79    4.90
   2   0  -7  391.36   14.70
  -2   0   7  411.96   14.90
   1   0  -7  291.87   11.60
   1   0  -7  332.87   11.70
  -1   0   7  319.67   11.70
   0   0  -7    6.40    1.20
   0   0   7    5.60    1.20
  -1   0  -7    2.10    0.90
  -1   0  -7    3.00    0.80
   1   0   7    3.30    1.30
  -2   0  -7  408.06   14.60
  -2   0  -7  379.66   14.50
   2   0   7  408.66   14.70
   3   0   7  219.08    8.40
  -4   0  -7  466.25   17.70
   4   0   7  491.95   17.80
  -5   0  -7    0.90    1.20
   6   0   7    6.00    1.60
   7  -1  -7   39.40    2.80
  -7   1   7   43.50    3.20
   6  -1  -7   12.70    2.10
  -6   1   7   14.10    2.40
  -5   1   7   50.09    3.10
   4  -1  -7  480.75   17.50
  -4   1   7  476.05   17.60
   3  -1  -7   84.69    3.50
  -3   1   7   85.79    3.70
   2  -1  -7 1200.78   45.30
   2  -1  -7 1283.47   45.20
  -2   1   7 1270.87   45.30
   1  -1  -7  274.97   10.10
   1  -1  -7  277.77   10.20
  -1   1   7  275.97   10.30
   0  -1  -7  339.67   12.40
   0   1   7  340.87   12.50
  -1  -1  -7  538.05   19.50
  -1  -1  -7  546.15   19.60
   1   1   7  534.65   19.60
  -2  -1  -7  161.58    5.90
  -2  -1  -7  151.78    5.80
   2   1   7  160.28    6.10
  -3  -1  -7  104.39    4.10
   3   1   7  115.79    4.50
  -4  -1  -7  592.14   21.80
   4   1   7  599.94   21.80
  -5  -1  -7   13.50    1.80
   5   1   7   15.10    2.00
  -6  -1  -7    2.80    1.10
   6   1   7    0.60    1.30
   7  -2  -7   49.50    2.80
  -7   2   7   54.59    3.50
   6  -2  -7   83.39    3.90
  -6   2   7   87.09    4.20
  -5   2   7    2.20    1.50
   4  -2  -7  109.39    4.40
  -4   2   7  106.29    4.60
   3  -2  -7  101.49    3.90
   3  -2  -7   90.39    3.90
  -3   2   7  104.89    4.10
   2  -2  -7  423.36   15.40
   2  -2  -7  433.06   15.60
   2  -2  -7  432.56   15.50
  -2   2   7  414.96   15.60
   1  -2  -7  200.38    7.80
  -1   2   7  220.88    7.90
   0   2   7    5.50    0.80
   0   2   7    7.20    0.80
   1   2   7 1083.39   39.10
   2   2   7  213.48    7.90
  -3  -2  -7   49.90    2.30
  -3  -2  -7   52.49    2.10
   3   2   7   54.19    2.70
   4   2   7   14.70    1.60
   5   2   7   61.29    3.00
   6  -3  -7    8.90    1.50
  -6   3   7   13.40    2.30
   5  -3  -7   29.10    2.20
  -5   3   7   33.00    2.50
   4  -3  -7  147.79    5.60
  -4   3   7  139.09    5.70
   3  -3  -7    4.50    0.90
  -2   3   7  403.26   14.80
  -1   3   7    3.00    0.70
   2   3   7  164.18    6.10
   3   3   7  167.18    6.30
   4   3   7  263.77   10.00
   6  -4  -7  127.69    5.30
  -6   4   7  132.19    5.60
   5  -4  -7   50.59    2.90
  -5   4   7   59.49    3.10
   4  -4  -7   54.69    2.70
  -4   4   7   59.29    2.90
  -3   4   7  113.89    4.50
  -3   4   7  104.59    4.30
  -2   4   7   63.59    2.70
  -2   4   7   66.39    2.90
   5  -5  -7  127.89    5.10
  -4   5   7   10.80    1.80
  -3   5   7   13.70    1.50
  -2   5   7    1.90    1.00
  -1   5   7  296.87   11.10
  -3   6   7    4.90    1.10
  -2   6   7   88.49    3.90
  -1   6   7    2.80    1.20
  -2   7   7   22.30    3.20
  -1   7   7  107.09    4.80
   0   7   7   -0.80    1.20
   0   8   7   -0.50    1.40
   3   7  -8   31.00    2.70
   2   7  -8    3.10    1.50
  -2  -7   8    4.60    1.40
   1   7  -8   24.90    2.70
  -1  -7   8   23.00    2.40
   0   7  -8    5.90    1.10
   0  -7   8    7.80    1.60
  -1   7  -8   27.20    1.90
   1  -7   8   24.90    2.80
  -2   7  -8    2.20    1.10
   2  -7   8    3.50    2.00
   4   6  -8   48.10    2.50
   4   6  -8   45.10    2.80
  -4  -6   8   44.90    2.80
   3   6  -8    6.60    1.40
  -3  -6   8   10.80    2.20
   2   6  -8  142.89    5.80
   2   6  -8  150.08    6.20
  -2  -6   8  142.09    6.00
   1   6  -8  337.87   12.60
   1   6  -8  335.17   12.30
  -1  -6   8  317.27   12.70
   0   6  -8  187.78    7.10
   0  -6   8  174.68    7.50
   1  -6   8  408.46   15.40
  -2   6  -8    8.50    1.50
   2  -6   8    8.10    1.90
  -3   6  -8   20.10    1.80
   3  -6   8   19.10    3.00
   5   5  -8  192.78    7.60
  -5  -5   8  193.18    7.80
   4   5  -8  192.68    7.30
  -4  -5   8  184.48    7.60
   3   5  -8   41.00    2.30
   3   5  -8   38.90    2.60
  -3  -5   8   36.00    3.20
   2   5  -8   49.90    3.00
   2   5  -8   49.50    2.60
  -2  -5   8   45.10    3.20
   1   5  -8   54.59    2.80
  -1  -5   8   53.49    3.40
   0   5  -8   -1.20    1.10
   0  -5   8    0.30    1.90
  -1   5  -8 1119.19   40.70
   2  -5   8   43.80    3.20
   3  -5   8   44.70    3.40
   4  -5   8    8.00    2.10
   6   4  -8   11.60    1.80
  -6  -4   8    8.60    1.80
   5   4  -8  242.18    9.10
  -5  -4   8  231.48    9.30
   4   4  -8   93.29    4.00
   4   4  -8   91.69    3.80
  -4  -4   8   88.99    4.50
   3   4  -8   84.29    3.70
   3   4  -8   85.69    3.70
  -3  -4   8   83.79    4.30
   2   4  -8  104.79    4.40
   2   4  -8  106.39    4.50
  -2  -4   8  104.59    4.80
   1   4  -8   41.70    2.30
  -1  -4   8   42.10    3.10
   0   4  -8  353.76   13.30
   0  -4   8  363.46   13.60
  -1   4  -8  114.29    4.70
   1  -4   8  112.39    5.20
  -2   4  -8   13.40    1.60
   2  -4   8   10.50    2.20
   3  -4   8   23.20    2.90
  -4   4  -8  175.48    7.00
   4  -4   8  164.68    7.20
  -5   4  -8   13.50    2.30
   5  -4   8   12.90    2.50
   6   3  -8   24.80    2.10
  -6  -3   8   19.50    2.80
   5   3  -8   14.00    2.00
  -5  -3   8   17.70    2.60
   4   3  -8   24.40    1.50
   4   3  -8   25.10    2.00
  -4  -3   8   19.80    3.00
   3   3  -8   95.79    3.90
   3   3  -8   91.69    4.00
  -3  -3   8   94.59    4.40
   2   3  -8  154.38    6.10
  -2  -3   8  159.78    6.40
   1   3  -8  300.97   11.70
  -1  -3   8  331.77   12.00
   0   3  -8   48.30    2.40
   0  -3   8   52.39    3.00
  -1   3  -8  464.25   17.20
   1  -3   8  473.65   17.40
  -2   3  -8   29.90    2.00
   2  -3   8   31.00    2.60
  -4   3  -8   75.79    3.70
   4  -3   8   71.59    3.90
  -5   3  -8   11.10    2.20
   5  -3   8    8.10    1.90
   6   2  -8   18.90    2.00
  -6  -2   8   16.30    2.70
   5   2  -8  133.19    5.70
  -5  -2   8  129.69    5.70
   4   2  -8   43.40    2.00
   4   2  -8   45.70    2.50
  -4  -2   8   47.00    3.00
   3   2  -8   28.60    1.70
   3   2  -8   26.90    1.80
  -3  -2   8   32.00    2.50
   2   2  -8  131.99    5.20
  -2  -2   8  134.89    5.50
   1   2  -8  413.36   15.50
  -1  -2   8  435.96   15.80
   0   2  -8  171.58    6.60
   0  -2   8  177.48    6.90
  -1   2  -8   28.70    1.70
   1  -2   8   27.30    2.30
  -2   2  -8   67.19    3.00
   2  -2   8   67.29    3.40
   3  -2   8   17.10    2.30
  -4   2  -8   82.59    3.90
   4  -2   8   77.49    4.10
  -5   2  -8    5.00    1.40
   5  -2   8    4.60    1.80
   7   1  -8   12.60    1.90
  -7  -1   8   15.40    2.20
   6   1  -8   39.90    2.40
  -6  -1   8   34.10    2.90
  -5  -1   8   66.29    4.10
   4   1  -8  160.48    6.20
  -4  -1   8  159.08    6.50
   3   1  -8  239.88    9.00
   3   1  -8  231.38    8.80
  -3  -1   8  249.88    9.20
   2   1  -8 1322.07   49.50
  -2  -1   8 1416.06   49.60
   1   1  -8  461.55   17.10
  -1  -1   8  477.05   17.30
   0   1  -8  791.62   28.70
   0  -1   8  790.62   28.80
  -1   1  -8 1148.69   43.10
   1  -1   8 1237.28   43.30
  -2   1  -8  131.39    5.10
   2  -1   8  133.79    5.40
   3  -1   8  144.59    5.90
   4  -1   8  503.75   18.70
  -5   1  -8   24.50    2.30
   5  -1   8   21.30    2.60
  -6   1  -8   47.90    2.90
   6  -1   8   45.30    3.30
  -7   0   8   -1.80    1.60
   6   0  -8    1.00    1.30
  -6   0   8    2.60    1.60
   4   0  -8   -0.50    1.00
  -4   0   8   -1.10    1.40
   3   0  -8  107.29    4.30
  -3   0   8  106.79    4.50
   2   0  -8 6631.64  229.38
  -2   0   8 6096.79  229.18
   1   0  -8  237.68    9.20
   1   0  -8  253.17    9.10
   0   0  -8  385.36   14.80
   0   0  -8  424.36   14.80
   0   0   8  408.96   15.00
  -1   0  -8   96.89    3.70
  -1   0  -8   87.39    3.60
  -2   0  -8  461.25   16.60
   2   0   8  447.86   16.70
   3   0   8    1.00    1.30
   4   0   8  393.36   14.70
  -5   0  -8   49.60    2.80
   5   0   8   52.69    3.10
  -6   0  -8   38.60    2.50
   6   0   8   33.70    2.90
   7  -1  -8    9.70    1.80
  -7   1   8   12.20    2.60
   6  -1  -8   37.50    2.50
  -6   1   8   38.00    2.90
   5  -1  -8   66.49    3.80
  -5   1   8   75.89    3.90
   4  -1  -8  153.48    6.00
  -4   1   8  157.28    6.30
   3  -1  -8  242.98    9.00
  -3   1   8  243.28    9.20
   2  -1  -8 1365.06   47.20
   2  -1  -8 1250.37   47.30
   1  -1  -8  457.05   16.80
   1  -1  -8  462.85   16.70
  -1   1   8  461.95   16.90
   0  -1  -8  763.62   26.20
   0  -1  -8  637.44   26.40
   0   1   8  772.52   26.30
  -1  -1  -8 1096.09   41.00
  -1  -1  -8 1164.78   41.10
   1   1   8 1147.19   41.10
  -2  -1  -8  132.89    4.70
  -2  -1  -8  116.89    4.70
  -3  -1  -8  140.29    5.40
   3   1   8  144.19    5.60
   4   1   8  500.85   18.50
   6   1   8   43.00    2.80
   6  -2  -8   14.90    2.10
  -6   2   8   16.40    2.50
   5  -2  -8  131.99    5.40
  -5   2   8  132.59    5.60
   4  -2  -8   42.20    2.30
  -4   2   8   41.20    2.70
   3  -2  -8   22.20    1.40
   3  -2  -8   26.30    1.60
  -3   2   8   28.00    1.90
   2  -2  -8  125.69    4.80
   2  -2  -8  132.39    4.70
   2  -2  -8  117.29    4.70
  -2   2   8  123.99    5.00
  -1   2   8  409.06   15.00
   0   2   8  161.38    6.10
   1   2   8   27.40    1.60
   2   2   8   65.49    2.80
  -3  -2  -8   19.80    1.10
   3   2   8   22.30    1.80
  -4  -2  -8   75.39    3.00
   4   2   8   77.09    3.40
   5   2   8    4.20    1.20
   6  -3  -8   17.00    2.00
  -6   3   8   21.40    2.50
   5  -3  -8    9.40    1.90
   4  -3  -8   19.50    1.80
  -4   3   8   20.80    2.20
   3  -3  -8   77.99    3.60
   3  -3  -8   90.49    3.50
  -3   3   8   93.69    3.70
   2  -3  -8  153.68    5.70
  -2   3   8  146.39    5.80
  -1   3   8  281.97   10.40
   2   3   8   30.10    1.60
   3   3   8   13.80    1.90
   6  -4  -8    6.20    1.40
  -6   4   8    9.50    1.50
   5  -4  -8  244.18    9.00
  -5   4   8  229.38    9.50
   4  -4  -8   79.19    3.40
  -4   4   8   82.49    3.60
  -3   4   8   77.49    3.40
  -2   4   8   94.49    3.80
  -3   5   8   36.00    1.90
  -2   6   8  134.89    5.50
  -2   7   8    2.40    1.30
  -1   7   8   24.50    2.40
   3   7  -9    4.90    1.50
  -3  -7   9    6.70    1.60
   2   7  -9   32.50    2.10
   2   7  -9   29.20    2.80
  -2  -7   9   30.70    2.60
   1   7  -9   16.80    2.60
   1   7  -9   23.20    1.90
  -1  -7   9   15.30    2.50
   0   7  -9   11.30    1.80
   0  -7   9   14.60    2.50
  -1   7  -9    8.30    1.70
   1  -7   9    8.00    2.00
   4   6  -9   12.10    1.70
   4   6  -9   10.10    1.70
  -4  -6   9    8.60    1.70
   3   6  -9  185.18    7.30
   3   6  -9  178.88    7.10
  -3  -6   9  177.88    7.30
   2   6  -9   56.59    3.40
  -2  -6   9   56.29    3.40
  -1  -6   9   44.80    3.20
   0  -6   9  107.99    5.20
  -1   6  -9   90.69    4.00
   1  -6   9   89.39    4.60
  -2   6  -9   26.60    2.00
   2  -6   9   25.00    3.00
  -3   6  -9  210.48    7.80
   3  -6   9  188.08    8.30
   5   5  -9  407.56   14.80
  -5  -5   9  380.56   14.90
   4   5  -9   41.90    2.40
   4   5  -9   36.80    2.30
  -4  -5   9   39.70    3.00
   3   5  -9   17.40    2.00
  -3  -5   9   14.30    2.60
   2   5  -9   29.10    2.10
   2   5  -9   31.40    2.50
  -2  -5   9   24.90    3.10
   1   5  -9   59.09    2.90
   0   5  -9  715.03   26.20
   1  -5   9  489.15   18.40
  -2   5  -9   13.00    1.60
   2  -5   9   12.60    2.70
  -3   5  -9    0.70    1.00
   3  -5   9    0.10    2.00
   4  -5   9   17.40    2.90
  -6  -4   9    9.20    2.00
   5   4  -9   22.60    2.10
  -5  -4   9   24.00    2.90
   4   4  -9   53.59    2.50
  -4  -4   9   50.39    3.30
   3   4  -9   23.30    1.90
   3   4  -9   22.90    2.10
   2   4  -9  305.97   11.40
  -2  -4   9  304.47   11.70
   1   4  -9  465.15   17.30
  -1  -4   9  476.65   17.60
   0   4  -9   72.69    3.40
   0  -4   9   77.79    4.10
  -1   4  -9  126.29    5.20
   1  -4   9  126.69    5.70
   2  -4   9   79.89    4.30
  -3   4  -9   97.69    4.10
   3  -4   9   93.69    4.80
   4  -4   9    6.80    2.10
   6   3  -9   30.90    2.30
   5   3  -9  226.58    8.40
  -5  -3   9  211.58    8.70
   4   3  -9   92.89    3.90
   4   3  -9   85.39    3.50
  -4  -3   9   83.59    4.60
   3   3  -9   34.00    2.20
   3   3  -9   32.00    2.00
  -3  -3   9   29.70    2.90
   2   3  -9   81.59    3.50
  -2  -3   9   83.09    4.00
   1   3  -9   73.89    3.30
  -1  -3   9   76.69    3.90
   0   3  -9   32.70    1.90
   0  -3   9   29.50    2.60
  -1   3  -9  157.88    6.20
   1  -3   9  159.88    6.60
  -2   3  -9  124.39    5.10
   2  -3   9  129.49    5.60
   3  -3   9  336.27   12.90
   4  -3   9   13.20    2.60
  -5   3  -9   13.20    2.20
   5  -3   9    9.20    2.10
   6   2  -9    3.20    1.20
  -6  -2   9    3.60    1.80
   5   2  -9   60.49    3.10
  -5  -2   9   58.29    3.60
   4   2  -9  135.59    5.30
   4   2  -9  145.09    5.60
  -4  -2   9  142.29    6.00
   3   2  -9   58.39    2.80
   3   2  -9   53.89    2.70
  -3  -2   9   60.59    3.30
   2   2  -9  258.47   10.10
  -2  -2   9  282.47   10.30
   1   2  -9  248.18    9.60
  -1  -2   9  267.27    9.90
   0   2  -9  298.37   11.30
   0  -2   9  310.77   11.50
  -1   2  -9   37.80    2.00
   1  -2   9   35.30    2.70
  -2   2  -9   92.09    3.90
   2  -2   9  100.29    4.50
   3  -2   9   45.70    3.10
   4  -2   9   12.50    2.40
  -5   2  -9   20.20    2.30
   5  -2   9   23.30    2.70
   6   1  -9   47.10    2.70
  -6  -1   9   44.10    3.30
   5   1  -9  295.87   10.80
  -5  -1   9  278.67   11.10
   4   1  -9  739.23   27.40
  -4  -1   9  766.12   27.60
   3   1  -9   20.10    1.70
   3   1  -9   19.90    1.10
  -3  -1   9   18.80    2.50
   2   1  -9   81.59    3.50
  -2  -1   9   84.99    3.90
   1   1  -9  335.27   12.60
  -1  -1   9  350.06   12.80
   0   1  -9  137.49    5.40
   0  -1   9  141.99    5.70
  -1   1  -9  334.57   12.50
   1  -1   9  343.67   12.70
  -2   1  -9  221.78    8.30
   2  -1   9  216.28    8.50
  -3   1  -9  643.94   23.70
   3  -1   9  654.73   23.90
   5  -1   9   66.79    3.70
   6   0  -9   35.60    2.50
  -6   0   9   37.00    2.90
   5   0  -9   23.80    2.10
   4   0  -9  323.47   12.10
  -4   0   9  329.77   12.40
   3   0  -9  154.88    5.90
  -3   0   9  153.48    6.30
   2   0  -9 3774.52  136.69
  -2   0   9 3813.22  136.79
   1   0  -9  151.68    6.50
   1   0  -9  175.08    6.40
  -1   0   9  178.78    6.70
   0   0  -9   46.70    2.10
   0   0  -9   42.50    2.10
   0   0   9   47.60    2.60
  -1   0  -9    0.20    0.70
   1   0   9    0.90    1.20
  -2   0  -9   70.29    3.00
   2   0   9   69.89    3.30
  -3   0  -9   38.00    2.10
   3   0   9   32.50    2.80
   4   0   9  172.68    7.00
   5   0   9    6.90    1.60
   6  -1  -9   47.10    2.70
  -6   1   9   43.00    3.10
   5  -1  -9  292.67   11.00
   4  -1  -9  725.23   26.80
  -4   1   9  749.23   27.00
   3  -1  -9   16.30    1.60
  -3   1   9   20.40    2.10
   2  -1  -9   67.59    3.40
   2  -1  -9   82.09    3.20
  -2   1   9   84.09    3.70
   1  -1  -9  350.76   12.60
  -1   1   9  341.37   12.90
   0  -1  -9  142.09    5.20
   0  -1  -9  136.69    5.20
   0   1   9  135.49    5.50
  -1  -1  -9  331.17   11.60
  -1  -1  -9  304.77   11.60
   1   1   9  314.27   11.80
  -2  -1  -9  216.48    7.80
  -2  -1  -9  193.28    7.70
   2   1   9  222.08    8.00
  -3  -1  -9  635.14   23.30
   3   1   9  647.74   23.50
  -4  -1  -9   41.20    2.00
   4   1   9   41.30    2.70
   5   1   9   62.19    4.20
   6  -2  -9    2.80    1.40
  -6   2   9    5.30    1.50
   5  -2  -9   52.99    2.90
   4  -2  -9  141.59    5.60
  -4   2   9  141.89    5.80
   3  -2  -9   56.09    2.90
   3  -2  -9   61.29    2.60
  -3   2   9   59.09    3.00
   2  -2  -9  221.48    9.00
   2  -2  -9  270.47    9.00
  -1   2   9  247.38    9.20
   0   2   9  286.17   10.60
   1   2   9   38.30    2.00
   2   2   9   95.89    4.00
   3   2   9   43.50    2.30
  -4  -2  -9   13.90    1.00
   4   2   9   11.00    1.70
   6  -3  -9   17.80    2.00
  -6   3   9   23.70    2.60
   5  -3  -9  226.38    8.30
  -5   3   9  206.38    8.80
   4  -3  -9   85.59    3.60
  -4   3   9   84.59    3.90
   3  -3  -9   28.80    1.70
  -3   3   9   31.80    2.00
  -2   3   9   80.19    3.50
  -1   3   9   70.79    3.00
   0   3   9   30.00    1.60
   1   3   9  149.39    5.60
   2   3   9  118.19    4.60
   6  -4  -9    7.00    1.40
   5  -4  -9   12.40    1.70
   4  -4  -9   48.60    2.20
  -4   4   9   46.50    2.60
  -3   4   9   23.20    1.70
  -2   4   9  272.17   10.10
  -1   4   9  435.16   15.90
   2   7 -10   44.30    3.10
   2   7 -10   43.20    2.50
  -2  -7  10   45.90    3.10
   1   7 -10   96.59    4.10
   1   7 -10   99.39    4.70
  -1  -7  10   90.09    4.60
   0   7 -10   99.99    4.30
   0  -7  10   97.79    4.90
  -1   7 -10    8.70    1.30
   1  -7  10    9.60    2.20
   4   6 -10   -0.80    1.00
  -4  -6  10    1.20    1.80
   3   6 -10   33.20    2.20
   3   6 -10   25.80    2.40
  -3  -6  10   27.70    2.80
   2   6 -10  203.08    7.90
   2   6 -10  212.78    8.20
  -2  -6  10  194.58    8.20
   1   6 -10   50.49    2.70
  -1  -6  10   45.20    3.20
   0   6 -10  202.28    7.80
   0  -6  10  195.58    8.20
  -1   6 -10   52.69    2.70
   1  -6  10   47.40    3.70
  -2   6 -10   48.20    2.60
   2  -6  10   45.00    3.60
   5   5 -10  161.18    6.40
  -5  -5  10  148.99    6.70
   4   5 -10   32.60    2.20
   4   5 -10   31.80    2.20
  -4  -5  10   32.90    2.90
   3   5 -10   36.40    2.30
   3   5 -10   33.90    2.40
  -3  -5  10   35.10    2.90
   2   5 -10   18.70    2.20
  -2  -5  10   16.20    2.80
  -1  -5  10   38.70    3.40
   0  -5  10  472.65   17.80
  -1   5 -10  295.17   11.10
   1  -5  10  287.97   11.50
  -2   5 -10    8.70    1.60
   2  -5  10    8.50    2.00
  -3   5 -10   24.90    1.80
   3  -5  10   18.60    3.20
   5   4 -10  149.59    5.80
  -5  -4  10  136.49    6.20
   4   4 -10   19.60    1.60
   4   4 -10   21.00    2.00
  -4  -4  10   20.50    2.80
   3   4 -10  134.59    5.30
  -3  -4  10  126.69    5.80
   2   4 -10  179.58    7.10
   1   4 -10  203.48    7.90
  -1  -4  10  204.78    8.30
   0   4 -10   80.19    3.60
   0  -4  10   75.79    4.30
  -1   4 -10   27.70    2.50
  -2   4 -10   54.89    2.80
   2  -4  10   56.69    3.70
  -3   4 -10   87.99    3.70
   3  -4  10   78.69    4.60
  -4   4 -10   12.60    1.70
   4  -4  10   12.10    2.20
   6   3 -10   44.10    2.60
  -6  -3  10   34.00    3.30
   5   3 -10   14.40    1.80
  -5  -3  10   13.40    2.10
   4   3 -10    6.20    1.10
   4   3 -10    6.70    1.50
  -4  -3  10    7.50    1.90
   3   3 -10  223.38    8.20
   3   3 -10  220.28    8.30
  -3  -3  10  207.28    8.60
   2   3 -10  145.19    5.80
  -2  -3  10  149.69    6.20
   1   3 -10   11.30    1.60
  -1  -3  10   10.10    1.90
   0   3 -10   49.60    2.60
   0  -3  10   50.69    3.20
  -1   3 -10   92.89    4.10
   1  -3  10  102.19    4.70
  -3   3 -10   10.40    1.70
   3  -3  10    8.00    2.00
   4  -3  10   77.99    4.30
   6   2 -10   13.40    1.90
  -6  -2  10   10.60    2.10
   5   2 -10   46.30    2.60
  -5  -2  10   42.60    3.20
   3   2 -10   36.20    2.30
  -3  -2  10   38.90    3.10
   2   2 -10  220.18    8.40
  -2  -2  10  222.08    8.70
   1   2 -10   39.20    2.10
  -1  -2  10   40.60    2.90
   0   2 -10   58.19    2.70
   0  -2  10   59.19    3.30
  -1   2 -10   62.29    2.90
   1  -2  10   61.19    3.50
  -2   2 -10   81.39    3.60
   2  -2  10   84.39    4.20
  -3   2 -10  109.19    4.50
  -4   2 -10    4.40    1.00
   4  -2  10    4.80    1.90
   5  -2  10   34.30    3.00
   6   1 -10   78.99    3.60
  -6  -1  10   70.79    4.10
   5   1 -10    1.70    1.20
  -5  -1  10    2.40    1.80
   4   1 -10   83.49    3.70
  -4  -1  10   85.59    4.30
   3   1 -10  134.99    5.30
  -3  -1  10  135.69    5.80
   2   1 -10  403.56   14.70
  -2  -1  10  398.16   15.00
   1   1 -10   79.79    3.40
  -1  -1  10   84.09    3.90
   0   1 -10 1109.69   41.20
   0  -1  10 1167.28   41.40
  -1   1 -10  383.56   14.50
   1  -1  10  402.96   14.70
  -2   1 -10   73.49    3.20
   2  -1  10   73.29    3.80
  -3   1 -10   55.29    2.80
   3  -1  10   54.79    3.50
  -4   1 -10  109.79    4.40
   4  -1  10  102.29    4.90
   5  -1  10  133.79    5.90
   6   0 -10    1.90    1.30
  -6   0  10    1.80    1.70
   5   0 -10   16.90    2.10
  -5   0  10   21.00    2.70
   4   0 -10   77.59    3.50
  -4   0  10   77.29    4.00
   3   0 -10  388.56   14.30
  -3   0  10  388.56   14.60
   2   0 -10  107.29    4.30
  -2   0  10  107.39    4.70
   1   0 -10   52.59    2.40
  -1   0  10   53.69    2.90
   0   0 -10   11.90    1.20
   0   0  10   13.80    1.80
  -1   0 -10  207.08    7.80
   1   0  10  211.88    8.10
  -2   0 -10  491.35   17.90
   2   0  10  488.75   18.10
  -3   0 -10 3220.38  117.09
   3   0  10 3272.07  117.19
  -4   0 -10   92.99    3.80
   4   0  10   90.09    5.00
  -5   0 -10   73.79    3.30
   5   0  10   75.69    3.90
   6  -1 -10   76.69    3.60
  -6   1  10   77.29    4.00
   5  -1 -10   -1.60    1.20
  -5   1  10    1.90    2.00
   4  -1 -10   80.79    3.50
  -4   1  10   77.79    4.00
   3  -1 -10  127.69    5.10
  -3   1  10  130.79    5.50
   2  -1 -10  404.06   13.80
   2  -1 -10  320.57   13.90
  -2   1  10  410.66   14.10
   1  -1 -10   85.79    3.20
  -1   1  10   74.49    4.00
   0  -1 -10 1059.59   39.30
   0  -1 -10 1118.59   39.30
  -1  -1 -10  384.76   14.10
   1   1  10  388.76   14.40
  -2  -1 -10   74.49    3.10
   2   1  10   77.79    3.40
  -3  -1 -10   52.79    2.30
   3   1  10   49.20    2.90
  -4  -1 -10  100.39    4.10
   4   1  10  105.99    4.50
  -5  -1 -10  137.99    5.30
   5   1  10  137.69    5.80
   6  -2 -10    9.30    1.40
  -6   2  10   12.70    2.50
   5  -2 -10   39.80    2.40
   4  -2 -10  185.08    7.20
  -4   2  10  190.68    7.50
   3  -2 -10   39.80    2.10
  -3   2  10   42.40    2.60
   2  -2 -10  227.78    7.70
   2  -2 -10  183.38    7.70
  -2   2  10  216.38    8.20
  -1   2  10   44.50    2.50
   0   2  10   55.69    2.60
   1   2  10   58.29    2.70
   2   2  10   88.69    4.60
   3   2  10  108.89    4.40
   4   2  10    2.10    1.50
   6  -3 -10   32.80    2.30
  -6   3  10   38.50    2.70
   5  -3 -10    6.60    1.30
   4  -3 -10    5.80    1.00
  -4   3  10    7.00    1.30
   3  -3 -10  213.38    7.80
  -3   3  10  203.98    8.00
  -2   3  10  142.49    6.00
  -1   3  10   12.50    1.40
   0   3  10   48.10    2.30
   1   3  10   90.49    3.60
   5  -4 -10  137.39    5.40
   4  -4 -10   13.50    1.20
  -4   4  10   17.10    1.90
  -3   4  10  121.59    4.90
  -2   4  10  177.78    7.00
   1   7 -11    1.20    1.30
   3   6 -11   50.19    3.00
   3   6 -11   55.79    2.80
  -3  -6  11   45.50    3.50
   2   6 -11   22.20    2.00
   2   6 -11   18.60    2.50
  -2  -6  11   18.50    2.90
   1   6 -11   13.80    1.90
  -1  -6  11   14.40    2.80
   0   6 -11   89.29    3.90
   0  -6  11   85.99    4.80
  -1   6 -11   75.09    3.40
   1  -6  11   70.79    4.50
  -2   6 -11   41.10    2.40
   2  -6  11   33.60    3.50
   4   5 -11    6.20    1.10
  -4  -5  11    6.40    1.90
   3   5 -11    4.90    1.10
  -3  -5  11    1.80    1.80
   2   5 -11  234.98    8.90
  -2  -5  11  229.78    9.40
   1   5 -11   53.89    2.90
  -1  -5  11   49.40    3.60
   0   5 -11  134.69    5.40
   0  -5  11  125.09    6.00
  -1   5 -11   35.20    2.30
   1  -5  11   29.60    3.40
  -2   5 -11   33.70    2.10
   2  -5  11   26.20    3.30
  -3   5 -11   12.30    1.80
   3  -5  11    8.30    2.30
   5   4 -11   26.20    2.20
  -5  -4  11   21.60    3.10
   4   4 -11   22.00    2.00
   4   4 -11   17.20    2.00
  -4  -4  11   26.80    3.00
   3   4 -11   62.49    2.90
   3   4 -11   57.19    3.00
  -3  -4  11   54.79    3.70
  -2  -4  11   19.10    2.90
  -1  -4  11    0.00    2.40
   0  -4  11  545.05   20.50
  -1   4 -11   75.69    3.50
   1  -4  11   73.59    4.30
  -2   4 -11   22.50    1.90
   2  -4  11   24.90    2.90
  -3   4 -11  308.67   11.50
   3  -4  11  296.97   11.90
  -4   4 -11   55.49    2.70
   4  -4  11   55.39    3.50
   6   3 -11   43.90    2.70
  -6  -3  11   44.70    3.50
   5   3 -11   33.80    2.20
  -5  -3  11   29.60    3.10
   4   3 -11    4.20    1.30
  -4  -3  11    3.00    1.90
   3   3 -11   28.10    1.80
   2   3 -11   44.20    2.50
  -2  -3  11   41.20    3.30
   1   3 -11   34.70    2.20
  -1  -3  11   36.70    3.10
   0   3 -11  152.28    6.10
   0  -3  11  157.48    6.70
  -1   3 -11   14.30    2.10
   1  -3  11   13.00    2.30
  -2   3 -11  130.99    5.20
   2  -3  11  124.39    5.90
  -3   3 -11  122.89    5.10
   3  -3  11  124.29    5.80
  -4   3 -11   61.59    2.90
   4  -3  11   51.99    3.90
   6   2 -11    7.20    1.40
  -6  -2  11    9.60    2.10
   5   2 -11   84.49    3.70
  -5  -2  11   74.19    4.30
   4   2 -11   36.40    2.40
  -4  -2  11   33.90    3.30
   3   2 -11  291.07   11.40
  -3  -2  11  321.57   11.90
   2   2 -11   84.59    3.70
  -2  -2  11   86.69    4.40
   1   2 -11   15.60    1.60
  -1  -2  11   15.60    2.60
   0   2 -11  216.78    8.40
   0  -2  11  226.18    8.80
  -1   2 -11  190.28    7.40
   1  -2  11  196.58    7.80
   2  -2  11   33.70    3.10
  -3   2 -11   22.40    1.90
   3  -2  11   25.60    3.00
  -4   2 -11   87.69    3.90
   4  -2  11   94.19    4.60
   6   1 -11    5.40    1.30
  -6  -1  11    6.10    1.90
   5   1 -11   83.49    3.70
  -5  -1  11   78.69    4.30
   3   1 -11  312.47   11.70
  -3  -1  11  316.17   12.10
   2   1 -11  103.79    4.30
  -2  -1  11  108.89    4.90
   1   1 -11  206.88    8.10
  -1  -1  11  225.28    8.50
   0   1 -11  401.96   14.80
   0  -1  11  403.06   15.10
  -1   1 -11  135.19    5.40
   1  -1  11  135.59    5.80
  -2   1 -11   47.30    2.50
   2  -1  11   48.50    3.20
  -3   1 -11  432.46   15.70
   3  -1  11  417.06   16.10
  -4   1 -11   17.00    1.50
   4  -1  11   13.00    1.90
  -5   1 -11    6.50    1.10
   5  -1  11    5.20    1.90
   6   0 -11   22.00    2.10
  -6   0  11   22.40    2.80
   5   0 -11  181.68    7.00
  -5   0  11  174.78    7.40
  -4   0  11   66.09    3.80
   3   0 -11  404.76   15.30
  -3   0  11  424.96   15.60
   2   0 -11  205.28    7.90
  -2   0  11  214.38    8.20
   1   0 -11    3.80    0.80
  -1   0  11    4.80    1.40
   0   0 -11    1.30    0.70
   0   0  11    1.10    1.30
  -1   0 -11  452.95   16.90
   1   0  11  468.55   17.10
  -2   0 -11    8.90    1.40
   2   0  11   11.10    2.30
   4   0  11    1.50    2.50
  -5   0 -11   43.50    2.30
   5   0  11   39.50    3.10
   6  -1 -11    4.90    1.30
  -6   1  11    4.20    1.80
   5  -1 -11   83.79    3.80
  -5   1  11   83.09    4.30
   4  -1 -11   40.30    2.40
  -4   1  11   44.10    3.10
   3  -1 -11  301.07   11.30
  -3   1  11  308.97   11.60
   2  -1 -11  109.59    4.30
  -2   1  11  109.29    4.70
   1  -1 -11  225.08    8.20
  -1   1  11  217.88    8.50
   0  -1 -11  399.06   14.20
   0  -1 -11  363.66   14.20
   0   1  11  403.56   14.50
  -1  -1 -11  135.69    5.20
   1   1  11  137.89    5.50
  -2  -1 -11   45.30    2.10
   2   1  11   45.90    2.70
  -3  -1 -11  416.96   15.40
   3   1  11  425.66   15.70
   4   1  11   10.10    1.50
  -5  -1 -11    8.40    1.30
   5   1  11    4.90    1.70
   6  -2 -11    5.80    1.40
  -6   2  11    7.50    1.70
   5  -2 -11   81.39    3.60
  -5   2  11   77.19    4.00
   4  -2 -11   32.40    2.10
  -4   2  11   30.90    2.70
   3  -2 -11  312.27   11.50
  -3   2  11  312.57   11.80
   2  -2 -11   89.89    3.60
  -2   2  11   95.09    4.10
   1  -2 -11   16.00    1.10
   0   2  11  213.38    8.20
   2   2  11   31.80    2.10
   3   2  11   21.90    1.90
   6  -3 -11   36.80    2.40
  -6   3  11   35.90    2.90
   5  -3 -11   25.80    1.90
   4  -3 -11    1.00    0.90
  -4   3  11    2.70    1.30
   3  -3 -11   25.60    1.60
  -3   3  11   29.50    2.10
  -2   3  11   44.00    2.90
  -1   3  11   30.10    1.90
   0   3  11  139.49    5.40
   3   6 -12   58.09    2.90
   3   6 -12   48.90    3.00
  -3  -6  12   49.80    3.80
   2   6 -12  115.09    4.70
   2   6 -12  112.09    5.00
  -2  -6  12  101.69    5.30
   1   6 -12  102.09    4.20
  -1  -6  12   84.69    4.80
   0   6 -12  241.58    9.10
   0  -6  12  226.38    9.60
   1  -6  12   -2.60    2.40
   4   5 -12   26.30    2.00
  -4  -5  12   18.40    3.00
   3   5 -12    7.10    1.60
   3   5 -12   10.60    1.80
  -3  -5  12    5.10    2.00
   2   5 -12   41.10    2.50
  -2  -5  12   40.60    3.40
   1   5 -12    3.50    1.20
  -1  -5  12    4.00    2.20
   0   5 -12  335.47   12.30
   0  -5  12  317.27   12.80
  -1   5 -12   51.09    2.80
   1  -5  12   51.29    3.80
  -2   5 -12   66.39    3.20
   2  -5  12   60.19    4.00
   5   4 -12   27.20    2.30
  -5  -4  12   26.20    3.00
   4   4 -12   26.80    2.00
  -4  -4  12   23.10    3.00
   3   4 -12    4.00    1.20
   3   4 -12    2.10    1.00
  -3  -4  12    1.90    2.00
   2   4 -12   36.60    2.50
  -2  -4  12   30.40    3.30
   1   4 -12  280.37   10.70
  -1  -4  12  283.77   11.20
   0   4 -12  190.88    7.60
   0  -4  12  195.18    8.10
  -1   4 -12   40.10    2.40
   1  -4  12   37.70    3.50
  -2   4 -12   15.60    1.70
   2  -4  12   19.20    3.00
  -3   4 -12  169.08    6.70
   3  -4  12  166.08    7.40
   5   3 -12   17.50    1.90
  -5  -3  12   14.60    2.80
   4   3 -12   56.19    2.80
  -4  -3  12   49.00    3.50
   3   3 -12  122.19    5.00
  -3  -3  12  120.39    5.70
  -2  -3  12  139.59    6.50
  -1   3 -12   61.69    2.90
   1  -3  12   56.49    3.80
  -2   3 -12    9.40    1.70
   2  -3  12    8.30    2.20
  -3   3 -12   23.70    2.00
   3  -3  12   22.00    3.10
  -4   3 -12    9.30    1.70
   4  -3  12    5.60    2.40
   6   2 -12  126.19    5.20
  -6  -2  12  121.89    5.50
   5   2 -12    2.60    1.30
  -5  -2  12    3.80    1.80
   4   2 -12    9.20    1.80
  -4  -2  12    8.00    2.00
   2   2 -12   74.29    3.50
  -2  -2  12   78.39    4.20
   1   2 -12   40.00    2.40
  -1  -2  12   40.50    3.40
   0   2 -12   58.59    3.00
   0  -2  12   60.79    3.70
  -1   2 -12   38.20    2.70
   1  -2  12   43.20    3.20
  -2   2 -12    1.60    1.10
  -3   2 -12   80.89    3.60
   3  -2  12   79.29    4.30
  -4   2 -12    2.10    1.00
   4  -2  12    0.40    2.00
   6   1 -12    6.10    1.40
  -6  -1  12    7.70    2.10
  -5  -1  12   55.19    3.60
   4   1 -12   51.19    2.80
  -4  -1  12   51.39    3.50
   3   1 -12  629.44   23.60
  -3  -1  12  663.03   23.90
   2   1 -12   64.79    3.00
  -2  -1  12   65.19    3.70
   1   1 -12   46.20    2.30
  -1  -1  12   43.90    3.20
   0   1 -12  302.67   11.40
   0  -1  12  312.17   11.80
  -1   1 -12  109.29    4.50
   1  -1  12  107.69    5.00
   2  -1  12   62.49    3.80
  -3   1 -12  411.16   15.30
   3  -1  12  412.26   16.60
   4  -1  12    0.80    1.80
   6   0 -12    2.20    1.20
  -6   0  12    6.10    1.90
   5   0 -12    8.20    1.30
  -5   0  12    6.70    1.80
   4   0 -12   -0.30    1.20
   3   0 -12  365.96   13.80
  -3   0  12  378.56   14.20
   2   0 -12    7.90    1.10
  -2   0  12    8.50    1.60
   1   0 -12  208.38    7.80
  -1   0  12  207.08    8.20
   0   0 -12   25.70    1.70
   0   0  12   25.60    2.50
  -1   0 -12  334.47   12.60
   1   0  12  348.07   12.90
  -2   0 -12    8.80    1.40
   2   0  12    8.80    1.70
  -3   0 -12  147.89    5.70
   3   0  12  144.59    6.20
  -4   0 -12   11.70    1.40
   4   0  12    8.60    1.80
   6  -1 -12    3.60    1.30
  -6   1  12    6.30    1.80
   5  -1 -12   57.29    3.00
  -5   1  12   58.39    3.70
   4  -1 -12   50.89    3.00
  -4   1  12   53.69    3.40
   3  -1 -12  617.34   22.80
  -3   1  12  635.44   23.10
   2  -1 -12   70.99    3.00
  -2   1  12   68.19    3.60
   1  -1 -12   49.70    2.30
  -1   1  12   50.89    2.90
   0  -1 -12  308.17   11.30
   0   1  12  309.57   11.70
  -1  -1 -12  104.29    4.10
   1   1  12  108.49    4.70
  -2  -1 -12   62.99    2.70
   2   1  12   62.79    3.30
  -3  -1 -12  392.36   14.90
   3   1  12  423.66   15.30
  -4  -1 -12    4.00    0.80
   6  -2 -12  119.89    5.10
  -6   2  12  124.69    5.60
   5  -2 -12   -0.10    1.10
  -5   2  12    1.90    1.60
   4  -2 -12    6.30    1.70
  -4   2  12   10.40    2.20
   3  -2 -12   25.50    1.80
  -3   2  12   28.70    2.50
   2  -2 -12   80.19    3.10
  -2   2  12   74.19    3.70
   1  -2 -12   41.20    1.90
  -1   2  12   44.50    2.70
   0   2  12   62.19    3.60
   1   2  12   46.30    2.60
   5  -3 -12   11.00    1.50
   4  -3 -12   53.69    2.40
  -4   3  12   54.49    3.00
   3  -3 -12  118.39    4.50
  -3   3  12  118.29    4.90
  -2   3  12  162.58    6.40
  -1   3  12    3.50    1.30
   2   6 -13   56.39    3.30
   2   6 -13   64.29    3.10
  -2  -6  13   48.60    3.80
   1   6 -13   33.20    2.40
  -1  -6  13   28.90    3.40
   0   6 -13   73.69    3.50
   0  -6  13   68.89    4.30
   4   5 -13    9.80    1.90
   3   5 -13   31.80    2.30
   3   5 -13   30.00    2.20
  -3  -5  13   31.70    3.40
   2   5 -13    8.40    1.80
  -2  -5  13    6.40    2.20
   1   5 -13  211.28    8.20
  -1  -5  13  207.88    8.80
   0   5 -13  208.48    7.90
   0  -5  13  189.78    8.50
  -1   5 -13   -1.20    1.20
   1  -5  13    0.70    2.20
  -2   5 -13    6.10    1.20
   2  -5  13    6.30    2.00
   4   4 -13   11.50    1.80
  -4  -4  13    3.10    2.00
   3   4 -13  134.79    5.40
   3   4 -13  142.39    5.60
  -3  -4  13  132.49    6.20
   2   4 -13  216.08    8.10
  -2  -4  13  200.78    8.60
   1   4 -13   29.80    2.30
  -1  -4  13   31.30    3.50
   0   4 -13   47.30    2.70
   0  -4  13   46.20    3.80
  -1   4 -13   45.70    2.50
   1  -4  13   44.60    3.60
  -2   4 -13   41.20    2.40
   2  -4  13   33.60    3.40
  -3   4 -13    9.60    1.70
   3  -4  13    4.50    2.30
   5   3 -13   43.70    2.50
  -5  -3  13   36.10    3.40
   4   3 -13   32.40    2.20
  -4  -3  13   26.00    3.10
   3   3 -13   26.90    2.20
  -3  -3  13   28.30    3.20
   2   3 -13   11.20    1.80
  -2  -3  13    8.40    2.10
   1   3 -13    7.40    1.30
  -1  -3  13    8.70    2.10
   0   3 -13   84.69    3.80
   0  -3  13   83.59    4.70
  -1   3 -13   64.99    3.20
   1  -3  13   64.69    4.10
  -2   3 -13  182.48    7.20
   2  -3  13  185.58    7.80
  -3   3 -13   25.40    2.00
   3  -3  13   25.80    3.30
   5   2 -13   37.90    2.50
  -5  -2  13   34.30    3.10
   4   2 -13   10.90    1.90
  -4  -2  13    8.90    2.00
   3   2 -13   75.59    3.50
  -3  -2  13   72.99    4.30
  -1  -2  13   50.59    3.60
   0  -2  13  123.09    5.80
  -1   2 -13  111.89    4.70
  -2   2 -13    6.30    1.10
   2  -2  13    5.50    2.00
  -3   2 -13   41.10    2.30
   3  -2  13   40.70    3.40
  -4   2 -13   20.20    1.90
   4  -2  13   20.90    3.30
   6   1 -13   72.69    3.50
  -6  -1  13   77.89    4.50
   5   1 -13  207.78    7.80
  -5  -1  13  194.28    8.30
   4   1 -13    8.70    1.80
  -4  -1  13   10.20    2.20
   3   1 -13   19.60    2.10
   2   1 -13   90.49    4.00
  -2  -1  13   96.09    4.70
   1   1 -13   57.09    2.80
  -1  -1  13   56.29    3.70
   0   1 -13  182.08    7.10
   0  -1  13  182.38    7.60
  -1   1 -13  120.79    5.20
   1  -1  13  125.89    5.60
  -2   1 -13  378.36   14.10
  -3   1 -13    0.60    0.90
  -4   1 -13   19.50    1.80
   4  -1  13   16.20    3.00
   6   0 -13    4.90    1.20
  -6   0  13    7.90    2.00
   5   0 -13   65.19    3.30
  -5   0  13   64.09    3.90
   4   0 -13   95.19    4.00
  -4   0  13   84.99    4.60
  -3   0  13 1847.52   66.99
   2   0 -13   41.00    2.20
  -2   0  13   33.80    2.90
   1   0 -13   46.10    2.40
  -1   0  13   47.40    3.30
   0   0 -13   55.89    2.60
   0   0  13   51.69    3.30
  -1   0 -13    0.50    0.90
   1   0  13    2.70    1.70
   2   0  13   -0.90    1.80
  -3   0 -13  110.49    4.50
  -4   0 -13   28.40    1.90
   4   0  13   33.20    2.80
   6  -1 -13   76.29    3.60
  -6   1  13   81.29    4.30
   5  -1 -13  200.78    7.80
  -5   1  13  203.08    8.20
   4  -1 -13    8.00    1.20
   3  -1 -13   21.00    1.90
  -3   1  13   21.10    2.70
   2  -1 -13   96.89    3.90
  -2   1  13   93.89    4.40
   1  -1 -13   61.29    2.60
  -1   1  13   58.09    3.40
   0  -1 -13  184.98    6.80
   0   1  13  174.58    7.20
  -1  -1 -13  128.49    5.00
   1   1  13  130.69    5.50
  -2  -1 -13  365.96   13.70
   2   1  13  380.96   14.00
  -3  -1 -13    0.30    0.80
   3   1  13   -1.70    1.50
   5  -2 -13   32.10    2.10
  -5   2  13   36.90    2.90
   4  -2 -13   11.20    1.50
  -4   2  13   11.30    2.20
   3  -2 -13   75.99    3.20
  -3   2  13   77.99    3.80
   2  -2 -13  129.29    4.90
  -2   2  13  124.99    5.30
   1  -2 -13   50.19    2.10
  -1   2  13   51.29    2.80
   0   2  13  123.39    5.00
   1   2  13  110.79    4.70
   5  -3 -13   40.80    2.10
  -5   3  13   41.90    2.90
   4  -3 -13   25.70    2.00
  -4   3  13   30.80    2.40
   3  -3 -13   22.90    1.30
  -3   3  13   25.40    2.20
  -2   3  13   10.30    1.80
   3   5 -14    8.30    1.90
   2   5 -14   26.30    2.10
  -2  -5  14   19.50    3.30
   1   5 -14  187.98    7.10
  -1  -5  14  168.28    7.80
   0   5 -14  242.48    9.20
   0  -5  14  232.18    9.90
  -1   5 -14   12.20    1.90
   1  -5  14   11.70    2.20
   4   4 -14   59.59    3.00
  -4  -4  14   58.79    3.80
   3   4 -14  105.29    4.50
  -3  -4  14  102.39    5.30
   2   4 -14   51.79    2.70
  -2  -4  14   46.40    3.80
   1   4 -14   87.19    3.90
  -1  -4  14   84.69    4.80
   0   4 -14   19.50    2.00
   0  -4  14   21.00    3.10
  -1   4 -14   38.80    2.30
   1  -4  14   35.10    3.50
  -2   4 -14   39.20    2.30
   2  -4  14   31.90    3.50
   5   3 -14    3.40    1.00
   4   3 -14   83.89    3.70
  -4  -3  14   75.59    4.40
   3   3 -14   99.89    4.30
  -3  -3  14   95.89    5.10
   2   3 -14    8.20    1.70
  -2  -3  14    6.90    2.00
   1   3 -14   41.10    2.50
  -1  -3  14   40.20    3.50
   0   3 -14   77.19    3.50
   0  -3  14   73.29    4.50
  -1   3 -14    5.00    1.10
   1  -3  14    2.10    2.00
  -2   3 -14   37.60    2.30
   2  -3  14   34.60    3.50
  -3   3 -14   84.49    3.70
   3  -3  14   84.69    5.00
   5   2 -14   58.39    2.90
  -5  -2  14   52.79    3.80
   4   2 -14   18.50    2.10
  -4  -2  14   22.20    3.20
   3   2 -14   53.99    2.70
  -3  -2  14   49.60    3.70
   2   2 -14    3.80    1.20
  -2  -2  14    5.80    2.10
   1   2 -14  101.39    4.20
  -1  -2  14   90.29    5.50
   0   2 -14   29.00    2.20
   0  -2  14   26.60    3.30
  -1   2 -14   15.90    1.80
   1  -2  14   19.30    3.10
  -2   2 -14  120.59    4.90
   2  -2  14  115.89    5.60
  -3   2 -14   17.90    1.90
   3  -2  14   21.40    3.20
   5   1 -14   37.60    2.50
  -5  -1  14   36.60    3.30
   4   1 -14   76.99    3.50
  -4  -1  14   74.19    4.30
   3   1 -14   38.90    2.50
  -3  -1  14   41.00    3.50
   2   1 -14   40.30    2.40
  -1  -1  14  254.17   10.10
   0  -1  14  171.48    7.30
  -1   1 -14   45.60    2.50
  -2   1 -14  127.19    5.10
   2  -1  14  126.39    5.90
  -3   1 -14   77.69    3.40
   3  -1  14   76.39    4.30
   5   0 -14   19.90    2.10
  -5   0  14   17.70    2.80
   4   0 -14   66.39    3.20
  -4   0  14   64.59    4.10
   3   0 -14   57.99    3.00
  -2   0  14   -2.70    1.70
   1   0 -14    2.70    1.00
  -1   0  14    2.10    1.70
   0   0 -14  165.08    6.50
   0   0  14  173.08    7.10
  -1   0 -14  231.98    8.80
   1   0  14  237.58    9.30
  -2   0 -14 1369.46   50.39
   2   0  14 1416.56   50.79
  -3   0 -14   54.09    2.50
   3   0  14   53.09    3.50
   5  -1 -14   34.40    2.20
  -5   1  14   31.90    3.10
   4  -1 -14   80.19    3.50
  -4   1  14   77.49    4.20
  -3   1  14   43.60    3.30
   2  -1 -14   37.30    2.10
  -2   1  14   37.10    3.00
   1  -1 -14  256.87    9.60
  -1   1  14  257.97   10.00
   0  -1 -14  176.78    6.60
   0   1  14  172.58    7.10
  -1  -1 -14   47.90    2.10
   1   1  14   44.60    2.90
  -2  -1 -14  125.69    4.90
   2   1  14  132.99    5.60
  -3  -1 -14   73.29    3.40
   5  -2 -14   55.69    2.70
  -5   2  14   56.99    3.50
   4  -2 -14   18.70    1.60
   3  -2 -14   52.09    2.40
  -3   2  14   52.29    3.00
   2  -2 -14    2.70    0.70
  -2   2  14    5.20    1.30
   1  -2 -14  102.99    3.90
  -1   2  14  100.99    4.50
   0   2  14   29.30    2.30
   5  -3 -14   -1.00    1.50
   2   5 -15   46.10    2.60
   1   5 -15  208.98    8.20
  -1  -5  15  212.18    9.10
   0   5 -15   11.60    1.90
   3   4 -15    1.30    1.20
  -3  -4  15    1.30    2.10
   2   4 -15    2.80    1.20
  -2  -4  15    4.10    2.20
   1   4 -15  112.09    4.60
  -1  -4  15   97.49    5.40
   0   4 -15    8.50    1.80
   0  -4  15    9.90    2.30
  -1   4 -15   12.90    1.90
   1  -4  15    7.20    2.40
   4   3 -15   14.00    1.90
  -4  -3  15   14.90    3.00
   3   3 -15   37.70    2.30
  -3  -3  15   29.90    3.40
   2   3 -15   49.50    2.60
  -2  -3  15   44.70    3.60
   1   3 -15  111.99    4.70
  -1  -3  15  108.09    5.50
   0   3 -15   29.20    2.20
   0  -3  15   26.70    3.40
  -1   3 -15   28.50    2.10
   1  -3  15   19.40    3.30
  -2   3 -15   28.40    2.10
   2  -3  15   32.10    3.60
   5   2 -15    2.90    1.60
   4   2 -15  140.19    5.50
  -4  -2  15  125.19    6.20
   3   2 -15   16.20    1.80
  -3  -2  15   13.30    2.30
   2   2 -15   31.70    2.20
  -2  -2  15   27.90    3.30
   1   2 -15   52.49    2.80
  -1  -2  15   52.79    4.00
   0   2 -15  105.89    4.40
   0  -2  15  102.39    5.40
  -1   2 -15   19.80    1.80
   1  -2  15   17.60    3.20
  -2   2 -15   26.30    1.90
   2  -2  15   23.30    3.30
  -3   2 -15   57.29    2.80
   3  -2  15   56.99    4.20
   5   1 -15   10.30    1.80
  -5  -1  15   17.20    3.00
   4   1 -15   71.99    3.40
  -4  -1  15   68.89    4.20
   3   1 -15   57.09    2.90
  -3  -1  15   57.59    3.80
   2   1 -15   79.69    3.60
  -2  -1  15   75.39    4.40
   1   1 -15  267.07   10.10
   0   1 -15  188.98    7.30
  -1   1 -15    8.40    1.50
   1  -1  15   10.00    2.00
  -2   1 -15  168.28    6.60
   2  -1  15  173.18    7.40
  -3   1 -15   19.80    1.80
   3  -1  15   19.60    3.40
   5   0 -15   18.40    1.90
  -5   0  15   22.30    3.10
   4   0 -15  289.67   10.80
  -4   0  15  284.27   11.30
   3   0 -15   59.49    2.90
  -3   0  15   59.39    3.90
   2   0 -15    1.20    1.00
  -2   0  15    3.20    2.10
  -1   0  15    3.60    2.00
   0   0  15  246.08    9.80
  -1   0 -15   16.20    1.60
   1   0  15   18.20    2.80
  -2   0 -15  266.47   10.00
   2   0  15  268.47   11.20
  -3   0 -15    2.20    0.90
   5  -1 -15    8.70    1.70
  -5   1  15   13.70    2.90
   4  -1 -15   73.69    3.30
  -4   1  15   73.09    4.20
   3  -1 -15   59.29    2.80
   2  -1 -15   75.49    3.40
  -2   1  15   81.99    4.00
   1  -1 -15  265.17    9.90
  -1   1  15  267.67   10.40
   0  -1 -15  188.88    7.10
   0   1  15  187.68    7.60
  -1  -1 -15    9.50    1.00
   1   1  15    7.80    1.60
   2   1  15  192.58    8.30
   4  -2 -15  133.99    5.30
  -4   2  15  136.39    5.90
  -3   2  15   21.40    2.40
   2  -2 -15   29.90    1.50
  -2   2  15   32.90    2.50
  -1   2  15   54.69    3.20
   2   4 -16  110.89    4.60
  -2  -4  16  108.39    5.40
   1   4 -16  175.68    6.90
  -1  -4  16  168.18    7.60
   0   4 -16   14.80    1.80
   0  -4  16   12.90    2.30
   3   3 -16   35.90    2.30
  -3  -3  16   33.50    3.50
   2   3 -16   20.70    1.90
  -2  -3  16   20.10    3.40
   1   3 -16   24.10    2.10
  -1  -3  16   23.80    3.50
   0   3 -16   49.00    2.70
   0  -3  16   46.60    4.10
  -1   3 -16   33.00    2.30
   1  -3  16   32.80    3.70
   4   2 -16    1.20    1.20
  -4  -2  16    3.10    2.30
   3   2 -16   25.40    2.00
  -3  -2  16   25.30    3.40
   2   2 -16    4.90    1.20
  -2  -2  16    7.60    2.10
   1   2 -16   46.30    2.60
  -1  -2  16   46.20    3.70
   0   2 -16   44.90    2.50
   0  -2  16   44.10    3.70
  -1   2 -16    3.80    1.20
   1  -2  16    5.60    2.20
  -2   2 -16   40.40    2.40
   2  -2  16   45.00    3.80
   4   1 -16  224.48    8.70
  -4  -1  16  229.98    9.30
   3   1 -16   10.20    1.70
   2   1 -16   17.30    1.80
  -2  -1  16   15.60    2.90
   1   1 -16   47.80    2.50
  -1  -1  16   45.60    3.70
   0   1 -16   32.50    2.00
   0  -1  16   32.50    3.50
  -1   1 -16   38.00    2.20
   1  -1  16   38.50    3.60
  -2   1 -16  185.48    7.30
   2  -1  16  193.08    8.10
   4   0 -16    1.80    1.20
  -4   0  16    1.30    2.10
   3   0 -16   16.10    1.60
  -3   0  16   15.30    2.90
   2   0 -16   51.19    2.60
  -2   0  16   50.09    3.50
   1   0 -16    4.60    1.00
   0   0 -16   91.59    3.80
  -1   0 -16    7.80    1.30
   1   0  16    9.40    2.50
  -2   0 -16   46.10    2.20
   2   0  16   37.60    3.40
   4  -1 -16  225.88    8.80
  -4   1  16  237.78    9.40
   3  -1 -16    9.80    1.30
  -3   1  16    5.40    2.00
   2  -1 -16   17.00    1.50
  -2   1  16   20.20    3.20
  -1   1  16   46.00    3.20
   0  -1 -16   31.00    1.60
   0   1  16   28.00    2.90
   1   1  16   43.50    4.00
   4  -2 -16    0.60    0.80
  -4   2  16    4.50    1.70
   3  -2 -16   21.90    1.30
   2   3 -17   21.00    1.90
  -2  -3  17   26.40    3.30
   1   3 -17   34.40    2.30
  -1  -3  17   31.20    3.80
   0   3 -17   20.60    1.90
   0  -3  17   16.90    3.60
   3   2 -17   51.89    2.70
  -3  -2  17   51.89    4.00
   2   2 -17   10.80    1.80
  -2  -2  17    6.00    2.20
   1   2 -17   83.69    3.70
  -1  -2  17   81.89    4.90
   0   2 -17   70.69    3.30
   0  -2  17   66.89    4.50
  -1   2 -17   30.70    2.10
   1  -2  17   25.10    3.60
   4   1 -17   41.20    2.40
   3   1 -17   25.80    2.10
  -3  -1  17   22.20    3.30
   2   1 -17   24.50    1.80
  -2  -1  17   23.70    3.10
   1   1 -17   62.59    3.00
  -1  -1  17   63.99    4.10
   0   1 -17   45.70    2.30
   0  -1  17   36.60    3.80
  -1   1 -17  138.39    5.50
   1  -1  17  136.39    6.50
   4   0 -17  522.25   19.10
  -4   0  17  514.45   19.60
   3   0 -17    4.30    1.10
  -3   0  17    6.40    2.20
   2   0 -17   33.00    2.00
  -2   0  17   32.60    3.20
   1   0 -17   65.19    2.90
  -1   0  17   63.89    4.10
   0   0 -17    9.00    1.30
   0   0  17    6.70    2.10
   1   0  17   15.40    3.00
   4  -1 -17   40.10    2.30
   3  -1 -17   25.40    1.60
  -3   1  17   27.10    2.90
   2  -1 -17   24.50    1.50
  -2   1  17   22.00    2.80
   1  -1 -17   65.69    2.70
   0  -1 -17   36.40    1.80
   2   2 -18  122.19    5.00
   1   2 -18    5.20    1.20
  -1  -2  18    3.30    2.60
   2   1 -18   49.99    2.50
  -2  -1  18   43.90    3.80
   1   1 -18   36.10    2.20
  -1  -1  18   36.00    3.80
   0   1 -18   11.90    1.60
   0  -1  18    8.40    2.60
   3   0 -18   20.30    1.80
   2   0 -18    0.30    1.00
  -2   0  18    0.30    2.10
   1   0 -18   65.49    2.80
  -1   0  18   62.09    4.10
   0   0 -18   65.89    2.90
   0   0  18   66.09    4.10
   2  -1 -18   44.90    2.20
  -2   1  18   57.39    3.70
   0   0   0    0.00    0.00

_computing_structure_solution     'SHELXT 2014/5 (Sheldrick, 2014)'
;
_shelx_hkl_checksum   77559
