# Supplementary material for: Hemi-Synthesis of Chiral Imine, Benzimidazole and Benzodiazepines from Essential Oil of Ammodaucus leucotrichus subsp. leucotrichus
Source: Molecules. 2019 Mar 10;24(5):975. doi: 10.3390/molecules24050975 (PMC6429316; doi:10.3390/molecules24050975)
Supplement: Supplementary file 1 [file molecules-24-00975-s001.zip › 2.cif]

 
data_2
 
#==============================================================================
# SUBMISSION DETAILS
#==============================================================================


_publ_contact_author_name         'Professor Artur Silva'
_publ_contact_author_address
; Department of Chemistry
  University of Aveiro
  CICECO
  3810-193
  Aveiro
  Portugal
;
_publ_contact_author_email        'artur.silva@ua.pt'
_publ_contact_author_fax          '+351 234 370084'
_publ_contact_author_phone        '+351 234 370714'

_journal_name_full                'SynLett'

loop_
_publ_author_name
_publ_author_address
_publ_author_footnote


 'Chebrouk, Farid'
;
  Laboratoire de Biomathematiques, Biophysique, Biochimie et Scientometrie 
  (L3BS)
  Faculte des Sciences de la Nature et de la Vie
  Universite de Bejaia
  06000 Bejaia
  Algeria
;
.

 'Khodir, Madani'
;
  Laboratoire de Biomathematiques, Biophysique, Biochimie et Scientometrie 
  (L3BS)
  Faculte des Sciences de la Nature et de la Vie
  Universite de Bejaia
  06000 Bejaia
  Algeria
;
.

 'Cherfaoui, Brahim'
;
  Centre de Recherche Scientifique et Technique en Analyses Physico-Chimiques
  BP 384, Bou-Ismail
  42004 Tipaza
  Algeria
;
.

 'Boukenna, Leila'
;
  Centre de Recherche Scientifique et Technique en Analyses Physico-Chimiques
  BP 384, Bou-Ismail
  42004 Tipaza
  Algeria
;
.

 'Valega, Monica'
;
  Department of Chemistry
  University of Aveiro
  QOPNA
  3810-193
  Aveiro
  Portugal
;
.

 'Talhi, Oualid'
;
  Centre de Recherche Scientifique et Technique en Analyses Physico-Chimiques
  BP 384, Bou-Ismail
  42004 Tipaza
  Algeria
  
  and
  
  Department of Chemistry
  University of Aveiro
  QOPNA
  3810-193
  Aveiro
  Portugal
;  
.

 'Mendes, Ricardo F.' 
; 
  Department of Chemistry
  University of Aveiro
  CICECO - Aveiro Institute of Materials
  3810-193
  Aveiro
  Portugal
;
.

'Almeida Paz, Filipe A.' 
; 
  Department of Chemistry
  University of Aveiro
  CICECO - Aveiro Institute of Materials
  3810-193
  Aveiro
  Portugal
;
.

 'Bachari, Khaldoun'
;
  Centre de Recherche Scientifique et Technique en Analyses Physico-Chimiques
  BP 384, Bou-Ismail
  42004 Tipaza
  Algeria
;
.

 'Silva, Artur M. S.'
;
  Department of Chemistry
  University of Aveiro
  QOPNA
  3810-193
  Aveiro
  Portugal
;
.

#=============================================================================
# start Validation Reply Form
# VALIDATION REPLY FORM
#

# Alerts LEVEL B
_vrf_PLAT111_2
;
PROBLEM: ADDSYM Detects New (Pseudo) Centre of Symmetry .        100 %Fit  
RESPONSE: This is an artifact because the structure needs to be 
non-centrosymmetric due to the use of a chiral natural product.
;

# end Validation Reply Form
#=============================================================================

#=============================================================================
_audit_creation_method            'SHELXL-2018/3, manual editing plus enCIFer'
_audit_creation_date              '04 December 2018'
_shelx_SHELXL_version_number      '2018/3'
#=============================================================================

_chemical_name_common             ?
_chemical_melting_point           ?
_chemical_formula_moiety          
 'C16 H18 N2' 
_chemical_formula_sum
 'C16 H18 N2' 
_chemical_formula_weight          238.32

loop_
 _atom_type_symbol
 _atom_type_description
 _atom_type_scat_dispersion_real
 _atom_type_scat_dispersion_imag
 _atom_type_scat_source
 'C'  'C'   0.0033   0.0016
 'International Tables Vol C Tables 4.2.6.8 and 6.1.1.4'
 'H'  'H'   0.0000   0.0000
 'International Tables Vol C Tables 4.2.6.8 and 6.1.1.4'
 'N'  'N'   0.0061   0.0033
 'International Tables Vol C Tables 4.2.6.8 and 6.1.1.4'

#=============================================================================
# CRYSTAL DATA
#=============================================================================

_space_group_crystal_system       orthorhombic
_space_group_IT_number            19
_space_group_name_H-M_alt         'P 21 21 21'
_space_group_name_Hall            'P 2ac 2ab'

_shelx_space_group_comment
;
The symmetry employed for this shelxl refinement is uniquely defined
by the following loop, which should always be used as a source of
symmetry information in preference to the above space-group names.
They are only intended as comments.
;
 
loop_
 _space_group_symop_operation_xyz
 'x, y, z'
 '-x+1/2, -y, z+1/2'
 '-x, y+1/2, -z+1/2'
 'x+1/2, -y+1/2, -z'
 
_cell_length_a                    8.6559(6)
_cell_length_b                    9.8848(7)
_cell_length_c                    30.285(2)
_cell_angle_alpha                 90
_cell_angle_beta                  90
_cell_angle_gamma                 90
_cell_volume                      2591.2(3)
_cell_formula_units_Z             8
_cell_measurement_temperature     150(2)
_cell_measurement_reflns_used     4346
_cell_measurement_theta_min       2.69
_cell_measurement_theta_max       24.04
 
_exptl_crystal_description        Block
_exptl_crystal_colour             Brown
_exptl_crystal_density_meas       ?
_exptl_crystal_density_method     ?
_exptl_crystal_density_diffrn     1.222          
_exptl_crystal_F_000              1024
_exptl_transmission_factor_min    0.6922
_exptl_transmission_factor_max    0.7452
_exptl_crystal_size_max           0.190
_exptl_crystal_size_mid           0.150
_exptl_crystal_size_min           0.120
_exptl_absorpt_coefficient_mu     0.072
_shelx_estimated_absorpt_T_min    0.986
_shelx_estimated_absorpt_T_max    0.991
_exptl_absorpt_correction_type    multi-scan
_exptl_absorpt_correction_T_min   ?
_exptl_absorpt_correction_T_max   ?
_exptl_absorpt_process_details    
; 
  SADABS-2016/2
  Reference: Krause, L., Herbst-Irmer, R., Sheldrick G.M. & Stalke D.,
  J. Appl. Cryst. 48 (2015) 3-10.
; 
 
#=============================================================================
# EXPERIMENTAL DATA
#============================================================================= 
 
_exptl_absorpt_special_details    
;
?
;
_diffrn_ambient_temperature       150(2)
_diffrn_radiation_wavelength      0.71073
_diffrn_radiation_type            MoK\a
_diffrn_source                    'fine-focus sealed tube'
_diffrn_radiation_monochromator   graphite
_diffrn_measurement_device_type   'Bruker X8 Kappa CCD APEX II'
_diffrn_measurement_method        '\w / \f scans'
_diffrn_detector_area_resol_mean  ?
_diffrn_reflns_number             21777
_diffrn_reflns_av_unetI/netI      0.0405
_diffrn_reflns_av_R_equivalents   0.0405
_diffrn_reflns_limit_h_min        -10
_diffrn_reflns_limit_h_max        10
_diffrn_reflns_limit_k_min        -11
_diffrn_reflns_limit_k_max        10
_diffrn_reflns_limit_l_min        -36
_diffrn_reflns_limit_l_max        36
_diffrn_reflns_theta_min          3.575
_diffrn_reflns_theta_max          25.342
_diffrn_reflns_theta_full         25.242
_diffrn_measured_fraction_theta_max   0.996
_diffrn_measured_fraction_theta_full  0.996
_diffrn_reflns_Laue_measured_fraction_max    0.996
_diffrn_reflns_Laue_measured_fraction_full   0.996
_diffrn_reflns_point_group_measured_fraction_max   0.997
_diffrn_reflns_point_group_measured_fraction_full  0.997
_reflns_number_total              4726
_reflns_number_gt                 3582
_reflns_threshold_expression      'I > 2\s(I)'
_reflns_Friedel_coverage          0.743
_reflns_Friedel_fraction_max      0.999
_reflns_Friedel_fraction_full     0.999
 
_reflns_special_details
;
 Reflections were merged by SHELXL according to the crystal
 class for the calculation of statistics and refinement.
 
 _reflns_Friedel_fraction is defined as the number of unique
 Friedel pairs measured divided by the number that would be
 possible theoretically, ignoring centric projections and
 systematic absences.
;
 
_computing_data_collection        'APEX3 2012.4 (Bruker, 2012b)'
_computing_cell_refinement        'SAINT V8.27b (Bruker, 2012a)'
_computing_data_reduction         'SAINT V8.27b (Bruker, 2012a)'
_computing_structure_solution     'SHELXT 2014/5 (Sheldrick, 2014)'
_computing_structure_refinement   'SHELXL-2018/3 (Sheldrick, 2017)'
_computing_molecular_graphics     'DIAMOND (Brandenburg, 1999)'  
_computing_publication_material   'SHELXL-2018/3 (Sheldrick, 2015)'


#=============================================================================
# REFINEMENT DATA
#=============================================================================

_refine_special_details           ?
_refine_ls_structure_factor_coef  Fsqd
_refine_ls_matrix_type            full
_refine_ls_weighting_scheme       calc
_refine_ls_weighting_details
'w=1/[\s^2^(Fo^2^)+(0.0407P)^2^+0.4882P] where P=(Fo^2^+2Fc^2^)/3'
_atom_sites_solution_primary      ?
_atom_sites_solution_secondary    ?
_atom_sites_solution_hydrogens    geom
_refine_ls_hydrogen_treatment     constr
_refine_ls_extinction_method      none
_refine_ls_extinction_coef        .
_refine_ls_abs_structure_details
;
 Flack x determined using 1313 quotients [(I+)-(I-)]/[(I+)+(I-)]
 (Parsons, Flack and Wagner, Acta Cryst. B69 (2013) 249-259).
;
_refine_ls_abs_structure_Flack    -1.7(10)
_chemical_absolute_configuration  rm
_refine_ls_number_reflns          4726
_refine_ls_number_parameters      327
_refine_ls_number_restraints      0
_refine_ls_R_factor_all           0.0633
_refine_ls_R_factor_gt            0.0421
_refine_ls_wR_factor_ref          0.0997
_refine_ls_wR_factor_gt           0.0912
_refine_ls_goodness_of_fit_ref    1.050
_refine_ls_restrained_S_all       1.050
_refine_ls_shift/su_max           0.000
_refine_ls_shift/su_mean          0.000

#=============================================================================
# ATOMIC COORDINATES AND DISPLACEMENT PARAMETERS
#=============================================================================

loop_
 _atom_site_label
 _atom_site_type_symbol
 _atom_site_fract_x
 _atom_site_fract_y
 _atom_site_fract_z
 _atom_site_U_iso_or_equiv
 _atom_site_adp_type
 _atom_site_occupancy
 _atom_site_site_symmetry_order  
 _atom_site_calc_flag
 _atom_site_refinement_flags_posn
 _atom_site_refinement_flags_adp
 _atom_site_refinement_flags_occupancy
 _atom_site_disorder_assembly
 _atom_site_disorder_group
C1 C -0.0605(4) 0.8997(4) 0.70162(10) 0.0296(9) Uani 1 1 d . . . . .
H00H H -0.075559 0.994844 0.701108 0.035 Uiso 1 1 calc R U . . .
C2 C -0.1635(4) 0.8149(4) 0.72266(11) 0.0325(10) Uani 1 1 d . . . . .
H00P H -0.251355 0.852580 0.736881 0.039 Uiso 1 1 calc R U . . .
C3 C -0.1417(4) 0.6747(4) 0.72356(11) 0.0324(10) Uani 1 1 d . . . . .
H00L H -0.214697 0.619780 0.738642 0.039 Uiso 1 1 calc R U . . .
C4 C -0.0170(4) 0.6137(4) 0.70313(11) 0.0285(9) Uani 1 1 d . . . . .
H00G H -0.003058 0.518424 0.703504 0.034 Uiso 1 1 calc R U . . .
C5 C 0.0875(4) 0.6995(3) 0.68190(10) 0.0218(8) Uani 1 1 d . . . . .
C6 C 0.0669(4) 0.8399(3) 0.68110(10) 0.0231(8) Uani 1 1 d . . . . .
C7 C 0.2804(4) 0.7967(4) 0.64637(10) 0.0238(8) Uani 1 1 d . . . . .
C8 C 0.4227(4) 0.8109(3) 0.62067(10) 0.0231(8) Uani 1 1 d . . . . .
C9 C 0.4465(4) 0.9413(3) 0.59618(11) 0.0299(8) Uani 1 1 d . . . . .
H00E H 0.482579 1.011499 0.617083 0.036 Uiso 1 1 calc R U . . .
H00F H 0.346731 0.971595 0.583652 0.036 Uiso 1 1 calc R U . . .
C10 C 0.5640(4) 0.9262(3) 0.55909(10) 0.0267(9) Uani 1 1 d . . . . .
H00C H 0.519471 0.869804 0.535267 0.032 Uiso 1 1 calc R U . . .
H00D H 0.587707 1.016407 0.546591 0.032 Uiso 1 1 calc R U . . .
C11 C 0.7125(4) 0.8612(4) 0.57573(11) 0.0252(9) Uani 1 1 d . . . . .
H0C H 0.748803 0.916625 0.601317 0.030 Uiso 1 1 calc R U . . .
C12 C 0.6768(4) 0.7202(4) 0.59353(11) 0.0330(9) Uani 1 1 d . . . . .
H00Q H 0.671733 0.656038 0.568470 0.040 Uiso 1 1 calc R U . . .
H00T H 0.762527 0.691203 0.612992 0.040 Uiso 1 1 calc R U . . .
C13 C 0.5277(4) 0.7128(4) 0.61900(11) 0.0323(9) Uani 1 1 d . . . . .
H0F H 0.507065 0.632171 0.635035 0.039 Uiso 1 1 calc R U . . .
C14 C 0.8426(4) 0.8584(4) 0.54260(11) 0.0261(9) Uani 1 1 d . . . . .
C15 C 0.8225(4) 0.8784(3) 0.49975(11) 0.0361(10) Uani 1 1 d . . . . .
H15A H 0.908529 0.875596 0.480297 0.043 Uiso 1 1 calc R U . . .
H15B H 0.721966 0.895488 0.488455 0.043 Uiso 1 1 calc R U . . .
C16 C 0.9999(4) 0.8311(4) 0.56152(11) 0.0376(10) Uani 1 1 d . . . . .
H00U H 1.074972 0.822567 0.537468 0.056 Uiso 1 1 calc R U . . .
H00V H 0.997298 0.746876 0.578568 0.056 Uiso 1 1 calc R U . . .
H00W H 1.029933 0.906076 0.580870 0.056 Uiso 1 1 calc R U . . .
C17 C 0.5718(4) 0.3983(4) 0.70182(10) 0.0287(9) Uani 1 1 d . . . . .
H00R H 0.591716 0.492502 0.699519 0.034 Uiso 1 1 calc R U . . .
C18 C 0.6716(4) 0.3144(4) 0.72424(10) 0.0318(10) Uani 1 1 d . . . . .
H00M H 0.760785 0.351941 0.737826 0.038 Uiso 1 1 calc R U . . .
C19 C 0.6447(4) 0.1750(4) 0.72748(11) 0.0286(9) Uani 1 1 d . . . . .
H00S H 0.715989 0.120039 0.743190 0.034 Uiso 1 1 calc R U . . .
C20 C 0.5168(4) 0.1159(4) 0.70831(11) 0.0265(8) Uani 1 1 d . . . . .
H00J H 0.498394 0.021371 0.710260 0.032 Uiso 1 1 calc R U . . .
C21 C 0.4168(4) 0.2012(4) 0.68612(10) 0.0221(8) Uani 1 1 d . . . . .
C22 C 0.4408(4) 0.3414(3) 0.68259(10) 0.0220(8) Uani 1 1 d . . . . .
C23 C 0.2292(4) 0.2984(4) 0.64766(10) 0.0213(8) Uani 1 1 d . . . . .
C24 C 0.0901(4) 0.3106(4) 0.62005(10) 0.0239(8) Uani 1 1 d . . . . .
C25 C 0.0852(4) 0.4049(3) 0.58848(11) 0.0295(8) Uani 1 1 d . . . . .
H25 H 0.171797 0.463134 0.585242 0.035 Uiso 1 1 calc R U . . .
C26 C -0.0489(4) 0.4240(4) 0.55792(11) 0.0312(9) Uani 1 1 d . . . . .
H00N H -0.023439 0.383872 0.528863 0.037 Uiso 1 1 calc R U . . .
H00O H -0.066454 0.522031 0.553488 0.037 Uiso 1 1 calc R U . . .
C27 C -0.1960(4) 0.3600(4) 0.57517(11) 0.0297(9) Uani 1 1 d . . . . .
H0T H -0.229354 0.414708 0.601261 0.036 Uiso 1 1 calc R U . . .
C28 C -0.1635(4) 0.2172(4) 0.59200(11) 0.0298(9) Uani 1 1 d . . . . .
H00A H -0.260386 0.177612 0.603585 0.036 Uiso 1 1 calc R U . . .
H00B H -0.128273 0.160298 0.567056 0.036 Uiso 1 1 calc R U . . .
C29 C -0.0412(4) 0.2149(4) 0.62824(10) 0.0296(8) Uani 1 1 d . . . . .
H00I H -0.090580 0.238410 0.656714 0.036 Uiso 1 1 calc R U . . .
H00K H 0.000324 0.121945 0.630875 0.036 Uiso 1 1 calc R U . . .
C30 C -0.3305(4) 0.3600(4) 0.54275(11) 0.0289(9) Uani 1 1 d . . . . .
C31 C -0.3127(4) 0.3844(4) 0.49986(12) 0.0427(11) Uani 1 1 d . . . . .
H1A H -0.400353 0.387725 0.481023 0.051 Uiso 1 1 calc R U . . .
H1B H -0.212254 0.398425 0.488057 0.051 Uiso 1 1 calc R U . . .
C32 C -0.4866(4) 0.3378(4) 0.56185(12) 0.0373(10) Uani 1 1 d . . . . .
H01A H -0.563729 0.338574 0.538165 0.056 Uiso 1 1 calc R U . . .
H01B H -0.509803 0.409923 0.583025 0.056 Uiso 1 1 calc R U . . .
H01C H -0.489189 0.250112 0.576956 0.056 Uiso 1 1 calc R U . . .
N1 N 0.2223(3) 0.6749(3) 0.65945(8) 0.0246(7) Uani 1 1 d . . . . .
H1 H 0.263756 0.595098 0.654418 0.030 Uiso 1 1 calc R U . . .
N2 N 0.1910(3) 0.9001(3) 0.65828(8) 0.0236(7) Uani 1 1 d . . . . .
N3 N 0.2790(3) 0.1777(3) 0.66410(8) 0.0221(7) Uani 1 1 d . . . . .
H3 H 0.232195 0.099122 0.661257 0.027 Uiso 1 1 calc R U . . .
N4 N 0.3223(3) 0.3998(3) 0.65868(8) 0.0230(7) Uani 1 1 d . . . . .
 
loop_
 _atom_site_aniso_label
 _atom_site_aniso_U_11
 _atom_site_aniso_U_22
 _atom_site_aniso_U_33
 _atom_site_aniso_U_23
 _atom_site_aniso_U_13
 _atom_site_aniso_U_12
C1 0.031(2) 0.024(2) 0.033(2) 0.0017(18) 0.0034(17) 0.005(2)
C2 0.030(2) 0.033(3) 0.035(2) -0.003(2) 0.0087(17) 0.001(2)
C3 0.032(2) 0.034(2) 0.032(2) -0.0002(19) 0.0036(16) -0.007(2)
C4 0.031(2) 0.023(2) 0.0316(19) 0.0015(17) -0.0002(16) -0.0033(18)
C5 0.0213(17) 0.020(2) 0.0238(18) -0.0011(16) -0.0013(15) -0.0028(17)
C6 0.0234(18) 0.024(2) 0.0218(18) 0.0004(16) -0.0023(15) -0.0010(17)
C7 0.0254(18) 0.021(2) 0.0252(18) 0.0019(17) -0.0016(15) -0.0020(19)
C8 0.0260(18) 0.019(2) 0.0238(18) 0.0018(16) 0.0007(14) -0.0009(18)
C9 0.0277(18) 0.0262(18) 0.036(2) 0.0060(16) 0.0046(15) 0.0047(15)
C10 0.030(2) 0.026(2) 0.0241(19) 0.0048(16) 0.0038(15) -0.0039(18)
C11 0.0253(18) 0.024(2) 0.0264(19) -0.0007(17) -0.0006(16) -0.0010(16)
C12 0.031(2) 0.030(2) 0.039(2) 0.0063(19) 0.0055(17) 0.0050(18)
C13 0.0305(19) 0.028(2) 0.038(2) 0.0100(17) 0.0048(16) -0.0029(18)
C14 0.0291(19) 0.019(2) 0.030(2) -0.0016(18) 0.0023(16) -0.0006(17)
C15 0.035(2) 0.040(2) 0.034(2) 0.000(2) 0.0062(18) 0.003(2)
C16 0.032(2) 0.040(2) 0.040(2) 0.001(2) 0.0031(18) 0.001(2)
C17 0.033(2) 0.025(2) 0.028(2) -0.0026(17) -0.0028(17) -0.002(2)
C18 0.029(2) 0.039(3) 0.028(2) 0.000(2) -0.0058(16) -0.003(2)
C19 0.029(2) 0.031(2) 0.0265(19) 0.0031(18) -0.0046(16) 0.0053(19)
C20 0.0296(19) 0.020(2) 0.0301(18) 0.0020(16) -0.0017(16) 0.0043(18)
C21 0.0234(18) 0.023(2) 0.0199(17) -0.0008(16) 0.0015(15) -0.0010(18)
C22 0.0241(19) 0.0198(19) 0.0222(18) 0.0009(15) 0.0018(15) 0.0024(17)
C23 0.0219(18) 0.020(2) 0.0224(18) 0.0019(17) 0.0048(14) 0.0007(18)
C24 0.0203(17) 0.022(2) 0.0297(19) 0.0001(17) 0.0019(15) 0.0013(18)
C25 0.0232(17) 0.033(2) 0.0323(18) 0.0054(16) -0.0014(15) -0.0047(15)
C26 0.027(2) 0.030(2) 0.036(2) 0.0061(18) -0.0024(16) -0.0050(19)
C27 0.0256(18) 0.034(2) 0.030(2) 0.0032(18) -0.0008(17) -0.0030(17)
C28 0.0243(19) 0.025(2) 0.041(2) 0.0021(19) -0.0013(16) -0.0018(17)
C29 0.0267(18) 0.025(2) 0.0372(19) 0.0066(16) -0.0026(15) -0.0030(17)
C30 0.0240(18) 0.030(2) 0.032(2) -0.0022(19) -0.0030(16) 0.0010(17)
C31 0.028(2) 0.064(3) 0.037(2) 0.003(2) -0.0061(19) 0.002(2)
C32 0.027(2) 0.040(2) 0.045(2) 0.003(2) -0.0030(17) 0.0009(19)
N1 0.0247(15) 0.0175(16) 0.0316(16) 0.0007(14) 0.0019(13) 0.0015(14)
N2 0.0249(15) 0.0216(17) 0.0244(16) 0.0017(14) 0.0023(13) -0.0016(15)
N3 0.0206(14) 0.0185(16) 0.0273(15) 0.0016(13) -0.0015(12) -0.0032(14)
N4 0.0229(15) 0.0193(16) 0.0267(16) -0.0006(14) 0.0005(13) 0.0005(14)
 
_geom_special_details
;
 All esds (except the esd in the dihedral angle between two l.s. planes)
 are estimated using the full covariance matrix.  The cell esds are taken
 into account individually in the estimation of esds in distances, angles
 and torsion angles; correlations between esds in cell parameters are only
 used when they are defined by crystal symmetry.  An approximate (isotropic)
 treatment of cell esds is used for estimating esds involving l.s. planes.
;
 
loop_
 _geom_bond_atom_site_label_1
 _geom_bond_atom_site_label_2
 _geom_bond_distance
 _geom_bond_site_symmetry_2
 _geom_bond_publ_flag
C1 C2 1.380(5) . ?
C1 C6 1.397(4) . ?
C1 H00H 0.9500 . ?
C2 C3 1.398(5) . ?
C2 H00P 0.9500 . ?
C3 C4 1.383(5) . ?
C3 H00L 0.9500 . ?
C4 C5 1.397(4) . ?
C4 H00G 0.9500 . ?
C5 N1 1.372(4) . ?
C5 C6 1.400(5) . ?
C6 N2 1.409(4) . ?
C7 N2 1.331(4) . ?
C7 N1 1.364(4) . ?
C7 C8 1.463(4) . ?
C8 C13 1.330(5) . ?
C8 C9 1.501(4) . ?
C9 C10 1.523(4) . ?
C9 H00E 0.9900 . ?
C9 H00F 0.9900 . ?
C10 C11 1.522(4) . ?
C10 H00C 0.9900 . ?
C10 H00D 0.9900 . ?
C11 C14 1.509(5) . ?
C11 C12 1.526(5) . ?
C11 H0C 1.0000 . ?
C12 C13 1.506(4) . ?
C12 H00Q 0.9900 . ?
C12 H00T 0.9900 . ?
C13 H0F 0.9500 . ?
C14 C15 1.324(4) . ?
C14 C16 1.501(5) . ?
C15 H15A 0.9500 . ?
C15 H15B 0.9500 . ?
C16 H00U 0.9800 . ?
C16 H00V 0.9800 . ?
C16 H00W 0.9800 . ?
C17 C18 1.376(5) . ?
C17 C22 1.393(4) . ?
C17 H00R 0.9500 . ?
C18 C19 1.401(5) . ?
C18 H00M 0.9500 . ?
C19 C20 1.380(5) . ?
C19 H00S 0.9500 . ?
C20 C21 1.382(4) . ?
C20 H00J 0.9500 . ?
C21 N3 1.386(4) . ?
C21 C22 1.406(5) . ?
C22 N4 1.381(4) . ?
C23 N4 1.329(4) . ?
C23 N3 1.363(4) . ?
C23 C24 1.471(4) . ?
C24 C25 1.336(4) . ?
C24 C29 1.499(4) . ?
C25 C26 1.497(4) . ?
C25 H25 0.9500 . ?
C26 C27 1.515(4) . ?
C26 H00N 0.9900 . ?
C26 H00O 0.9900 . ?
C27 C30 1.523(5) . ?
C27 C28 1.527(5) . ?
C27 H0T 1.0000 . ?
C28 C29 1.525(4) . ?
C28 H00A 0.9900 . ?
C28 H00B 0.9900 . ?
C29 H00I 0.9900 . ?
C29 H00K 0.9900 . ?
C30 C31 1.330(4) . ?
C30 C32 1.486(5) . ?
C31 H1A 0.9500 . ?
C31 H1B 0.9500 . ?
C32 H01A 0.9800 . ?
C32 H01B 0.9800 . ?
C32 H01C 0.9800 . ?
N1 H1 0.8800 . ?
N3 H3 0.8800 . ?
 
loop_
 _geom_angle_atom_site_label_1
 _geom_angle_atom_site_label_2
 _geom_angle_atom_site_label_3
 _geom_angle
 _geom_angle_site_symmetry_1
 _geom_angle_site_symmetry_3
 _geom_angle_publ_flag
C2 C1 C6 117.3(3) . . ?
C2 C1 H00H 121.3 . . ?
C6 C1 H00H 121.3 . . ?
C1 C2 C3 121.6(4) . . ?
C1 C2 H00P 119.2 . . ?
C3 C2 H00P 119.2 . . ?
C4 C3 C2 121.9(4) . . ?
C4 C3 H00L 119.1 . . ?
C2 C3 H00L 119.1 . . ?
C3 C4 C5 116.6(4) . . ?
C3 C4 H00G 121.7 . . ?
C5 C4 H00G 121.7 . . ?
N1 C5 C4 132.2(3) . . ?
N1 C5 C6 106.0(3) . . ?
C4 C5 C6 121.8(3) . . ?
C1 C6 C5 120.8(3) . . ?
C1 C6 N2 129.9(3) . . ?
C5 C6 N2 109.3(3) . . ?
N2 C7 N1 112.6(3) . . ?
N2 C7 C8 124.0(3) . . ?
N1 C7 C8 123.3(3) . . ?
C13 C8 C7 121.7(3) . . ?
C13 C8 C9 120.9(3) . . ?
C7 C8 C9 117.4(3) . . ?
C8 C9 C10 111.9(3) . . ?
C8 C9 H00E 109.2 . . ?
C10 C9 H00E 109.2 . . ?
C8 C9 H00F 109.2 . . ?
C10 C9 H00F 109.2 . . ?
H00E C9 H00F 107.9 . . ?
C11 C10 C9 111.1(3) . . ?
C11 C10 H00C 109.4 . . ?
C9 C10 H00C 109.4 . . ?
C11 C10 H00D 109.4 . . ?
C9 C10 H00D 109.4 . . ?
H00C C10 H00D 108.0 . . ?
C14 C11 C10 114.7(3) . . ?
C14 C11 C12 111.7(3) . . ?
C10 C11 C12 109.4(3) . . ?
C14 C11 H0C 106.9 . . ?
C10 C11 H0C 106.9 . . ?
C12 C11 H0C 106.9 . . ?
C13 C12 C11 113.5(3) . . ?
C13 C12 H00Q 108.9 . . ?
C11 C12 H00Q 108.9 . . ?
C13 C12 H00T 108.9 . . ?
C11 C12 H00T 108.9 . . ?
H00Q C12 H00T 107.7 . . ?
C8 C13 C12 124.7(3) . . ?
C8 C13 H0F 117.6 . . ?
C12 C13 H0F 117.6 . . ?
C15 C14 C16 121.4(3) . . ?
C15 C14 C11 123.4(3) . . ?
C16 C14 C11 115.2(3) . . ?
C14 C15 H15A 120.0 . . ?
C14 C15 H15B 120.0 . . ?
H15A C15 H15B 120.0 . . ?
C14 C16 H00U 109.5 . . ?
C14 C16 H00V 109.5 . . ?
H00U C16 H00V 109.5 . . ?
C14 C16 H00W 109.5 . . ?
H00U C16 H00W 109.5 . . ?
H00V C16 H00W 109.5 . . ?
C18 C17 C22 118.3(4) . . ?
C18 C17 H00R 120.8 . . ?
C22 C17 H00R 120.8 . . ?
C17 C18 C19 121.5(3) . . ?
C17 C18 H00M 119.3 . . ?
C19 C18 H00M 119.3 . . ?
C20 C19 C18 121.4(3) . . ?
C20 C19 H00S 119.3 . . ?
C18 C19 H00S 119.3 . . ?
C19 C20 C21 116.7(3) . . ?
C19 C20 H00J 121.7 . . ?
C21 C20 H00J 121.7 . . ?
C20 C21 N3 132.1(3) . . ?
C20 C21 C22 123.1(3) . . ?
N3 C21 C22 104.8(3) . . ?
N4 C22 C17 130.9(3) . . ?
N4 C22 C21 110.0(3) . . ?
C17 C22 C21 119.1(3) . . ?
N4 C23 N3 112.1(3) . . ?
N4 C23 C24 125.3(3) . . ?
N3 C23 C24 122.6(3) . . ?
C25 C24 C23 119.4(3) . . ?
C25 C24 C29 122.3(3) . . ?
C23 C24 C29 118.3(3) . . ?
C24 C25 C26 123.7(3) . . ?
C24 C25 H25 118.1 . . ?
C26 C25 H25 118.1 . . ?
C25 C26 C27 112.7(3) . . ?
C25 C26 H00N 109.0 . . ?
C27 C26 H00N 109.0 . . ?
C25 C26 H00O 109.0 . . ?
C27 C26 H00O 109.0 . . ?
H00N C26 H00O 107.8 . . ?
C26 C27 C30 114.9(3) . . ?
C26 C27 C28 110.2(3) . . ?
C30 C27 C28 110.9(3) . . ?
C26 C27 H0T 106.8 . . ?
C30 C27 H0T 106.8 . . ?
C28 C27 H0T 106.8 . . ?
C29 C28 C27 112.5(3) . . ?
C29 C28 H00A 109.1 . . ?
C27 C28 H00A 109.1 . . ?
C29 C28 H00B 109.1 . . ?
C27 C28 H00B 109.1 . . ?
H00A C28 H00B 107.8 . . ?
C24 C29 C28 113.4(3) . . ?
C24 C29 H00I 108.9 . . ?
C28 C29 H00I 108.9 . . ?
C24 C29 H00K 108.9 . . ?
C28 C29 H00K 108.9 . . ?
H00I C29 H00K 107.7 . . ?
C31 C30 C32 120.8(3) . . ?
C31 C30 C27 122.8(3) . . ?
C32 C30 C27 116.4(3) . . ?
C30 C31 H1A 120.0 . . ?
C30 C31 H1B 120.0 . . ?
H1A C31 H1B 120.0 . . ?
C30 C32 H01A 109.5 . . ?
C30 C32 H01B 109.5 . . ?
H01A C32 H01B 109.5 . . ?
C30 C32 H01C 109.5 . . ?
H01A C32 H01C 109.5 . . ?
H01B C32 H01C 109.5 . . ?
C7 N1 C5 107.5(3) . . ?
C7 N1 H1 126.2 . . ?
C5 N1 H1 126.2 . . ?
C7 N2 C6 104.6(3) . . ?
C23 N3 C21 107.5(3) . . ?
C23 N3 H3 126.2 . . ?
C21 N3 H3 126.2 . . ?
C23 N4 C22 105.5(3) . . ?
 
loop_
 _geom_torsion_atom_site_label_1
 _geom_torsion_atom_site_label_2
 _geom_torsion_atom_site_label_3
 _geom_torsion_atom_site_label_4
 _geom_torsion
 _geom_torsion_site_symmetry_1
 _geom_torsion_site_symmetry_2
 _geom_torsion_site_symmetry_3
 _geom_torsion_site_symmetry_4
 _geom_torsion_publ_flag
C6 C1 C2 C3 0.1(5) . . . . ?
C1 C2 C3 C4 -0.6(6) . . . . ?
C2 C3 C4 C5 0.7(5) . . . . ?
C3 C4 C5 N1 178.7(3) . . . . ?
C3 C4 C5 C6 -0.3(5) . . . . ?
C2 C1 C6 C5 0.3(5) . . . . ?
C2 C1 C6 N2 -178.5(3) . . . . ?
N1 C5 C6 C1 -179.5(3) . . . . ?
C4 C5 C6 C1 -0.2(5) . . . . ?
N1 C5 C6 N2 -0.5(4) . . . . ?
C4 C5 C6 N2 178.8(3) . . . . ?
N2 C7 C8 C13 162.6(3) . . . . ?
N1 C7 C8 C13 -19.7(5) . . . . ?
N2 C7 C8 C9 -17.2(5) . . . . ?
N1 C7 C8 C9 160.5(3) . . . . ?
C13 C8 C9 C10 20.3(5) . . . . ?
C7 C8 C9 C10 -159.9(3) . . . . ?
C8 C9 C10 C11 -51.0(4) . . . . ?
C9 C10 C11 C14 -172.6(3) . . . . ?
C9 C10 C11 C12 61.0(4) . . . . ?
C14 C11 C12 C13 -167.7(3) . . . . ?
C10 C11 C12 C13 -39.7(4) . . . . ?
C7 C8 C13 C12 -179.7(3) . . . . ?
C9 C8 C13 C12 0.1(5) . . . . ?
C11 C12 C13 C8 10.2(5) . . . . ?
C10 C11 C14 C15 -16.2(5) . . . . ?
C12 C11 C14 C15 109.0(4) . . . . ?
C10 C11 C14 C16 163.8(3) . . . . ?
C12 C11 C14 C16 -71.0(4) . . . . ?
C22 C17 C18 C19 0.8(5) . . . . ?
C17 C18 C19 C20 0.0(5) . . . . ?
C18 C19 C20 C21 -0.4(5) . . . . ?
C19 C20 C21 N3 -178.8(3) . . . . ?
C19 C20 C21 C22 0.1(5) . . . . ?
C18 C17 C22 N4 179.8(3) . . . . ?
C18 C17 C22 C21 -1.1(4) . . . . ?
C20 C21 C22 N4 -180.0(3) . . . . ?
N3 C21 C22 N4 -0.8(4) . . . . ?
C20 C21 C22 C17 0.7(5) . . . . ?
N3 C21 C22 C17 179.8(3) . . . . ?
N4 C23 C24 C25 30.9(5) . . . . ?
N3 C23 C24 C25 -147.4(3) . . . . ?
N4 C23 C24 C29 -149.6(3) . . . . ?
N3 C23 C24 C29 32.1(5) . . . . ?
C23 C24 C25 C26 178.6(3) . . . . ?
C29 C24 C25 C26 -0.8(5) . . . . ?
C24 C25 C26 C27 18.9(5) . . . . ?
C25 C26 C27 C30 -172.2(3) . . . . ?
C25 C26 C27 C28 -46.1(4) . . . . ?
C26 C27 C28 C29 57.9(4) . . . . ?
C30 C27 C28 C29 -173.8(3) . . . . ?
C25 C24 C29 C28 11.4(5) . . . . ?
C23 C24 C29 C28 -168.0(3) . . . . ?
C27 C28 C29 C24 -39.9(4) . . . . ?
C26 C27 C30 C31 15.0(6) . . . . ?
C28 C27 C30 C31 -110.8(4) . . . . ?
C26 C27 C30 C32 -162.1(4) . . . . ?
C28 C27 C30 C32 72.1(5) . . . . ?
N2 C7 N1 C5 -0.9(4) . . . . ?
C8 C7 N1 C5 -178.8(3) . . . . ?
C4 C5 N1 C7 -178.4(3) . . . . ?
C6 C5 N1 C7 0.8(4) . . . . ?
N1 C7 N2 C6 0.6(4) . . . . ?
C8 C7 N2 C6 178.5(3) . . . . ?
C1 C6 N2 C7 178.8(3) . . . . ?
C5 C6 N2 C7 -0.1(4) . . . . ?
N4 C23 N3 C21 -2.1(4) . . . . ?
C24 C23 N3 C21 176.4(3) . . . . ?
C20 C21 N3 C23 -179.3(3) . . . . ?
C22 C21 N3 C23 1.7(3) . . . . ?
N3 C23 N4 C22 1.5(4) . . . . ?
C24 C23 N4 C22 -176.9(3) . . . . ?
C17 C22 N4 C23 178.9(3) . . . . ?
C21 C22 N4 C23 -0.4(4) . . . . ?
 
loop_
 _geom_hbond_atom_site_label_D 
 _geom_hbond_atom_site_label_H 
 _geom_hbond_atom_site_label_A 
 _geom_hbond_distance_DH 
 _geom_hbond_distance_HA 
 _geom_hbond_distance_DA 
 _geom_hbond_angle_DHA 
 _geom_hbond_site_symmetry_A 
 _geom_hbond_publ_flag
N3 H3 N2  0.88 2.00 2.853(4) 163 1_545 yes
N1 H1 N4  0.88 2.00 2.854(4) 163 . yes
 
_refine_diff_density_max    0.171
_refine_diff_density_min   -0.195
_refine_diff_density_rms    0.036

_shelx_res_file
;
TITL test_b.res in P2(1)2(1)2(1)
    FP_18_019.res
    created by SHELXL-2018/3 at 12:02:15 on 04-Dec-2018
CELL  0.71073   8.6559   9.8848  30.2849   90.000   90.000   90.000
ZERR    8.000   0.0006   0.0007   0.0022    0.000    0.000    0.000
LATT -1
SYMM 1/2-X, -Y, 1/2+Z
SYMM -X, 1/2+Y, 1/2-Z
SYMM 1/2+X, 1/2-Y, -Z
SFAC C  H  N
UNIT 128 144 16
LIST 4 ! automatically inserted. Change 6 to 4 for CHECKCIF!!

HTAB

L.S. 10
BOND $H
ACTA
CONF
WPDB

FMAP 2
PLAN -5

EQIV $1 x, y-1, z

HTAB N3 N2_$1
HTAB N1 N4

SHEL 5.8 0.83

SIZE 0.19 0.15 0.12
REM Brown Block

TEMP -123.150
WGHT    0.040700    0.488200
FVAR       0.48859
C1    1   -0.060455    0.899664    0.701617    11.00000    0.03101    0.02420 =
         0.03347    0.00165    0.00336    0.00525
AFIX  43
H00H  2   -0.075559    0.994844    0.701108    11.00000   -1.20000
AFIX   0
C2    1   -0.163518    0.814852    0.722665    11.00000    0.02956    0.03268 =
         0.03524   -0.00274    0.00868    0.00107
AFIX  43
H00P  2   -0.251355    0.852580    0.736881    11.00000   -1.20000
AFIX   0
C3    1   -0.141705    0.674696    0.723560    11.00000    0.03166    0.03413 =
         0.03153   -0.00015    0.00360   -0.00708
AFIX  43
H00L  2   -0.214697    0.619780    0.738642    11.00000   -1.20000
AFIX   0
C4    1   -0.016965    0.613749    0.703126    11.00000    0.03106    0.02272 =
         0.03162    0.00148   -0.00020   -0.00328
AFIX  43
H00G  2   -0.003058    0.518424    0.703504    11.00000   -1.20000
AFIX   0
C5    1    0.087531    0.699532    0.681901    11.00000    0.02128    0.02047 =
         0.02375   -0.00111   -0.00134   -0.00279
C6    1    0.066920    0.839942    0.681099    11.00000    0.02339    0.02402 =
         0.02176    0.00043   -0.00227   -0.00098
C7    1    0.280447    0.796749    0.646370    11.00000    0.02537    0.02089 =
         0.02521    0.00185   -0.00157   -0.00197
C8    1    0.422686    0.810910    0.620671    11.00000    0.02599    0.01948 =
         0.02382    0.00177    0.00069   -0.00087
C9    1    0.446521    0.941256    0.596185    11.00000    0.02770    0.02625 =
         0.03575    0.00600    0.00464    0.00465
AFIX  23
H00E  2    0.482579    1.011499    0.617083    11.00000   -1.20000
H00F  2    0.346731    0.971595    0.583652    11.00000   -1.20000
AFIX   0
C10   1    0.564044    0.926209    0.559087    11.00000    0.02984    0.02625 =
         0.02414    0.00480    0.00376   -0.00386
AFIX  23
H00C  2    0.519471    0.869804    0.535267    11.00000   -1.20000
H00D  2    0.587707    1.016407    0.546591    11.00000   -1.20000
AFIX   0
C11   1    0.712470    0.861169    0.575727    11.00000    0.02527    0.02392 =
         0.02637   -0.00069   -0.00061   -0.00100
AFIX  13
H0C   2    0.748803    0.916625    0.601317    11.00000   -1.20000
AFIX   0
C12   1    0.676818    0.720206    0.593527    11.00000    0.03058    0.02975 =
         0.03869    0.00631    0.00551    0.00502
AFIX  23
H00Q  2    0.671733    0.656038    0.568470    11.00000   -1.20000
H00T  2    0.762527    0.691203    0.612992    11.00000   -1.20000
AFIX   0
C13   1    0.527675    0.712774    0.618999    11.00000    0.03047    0.02832 =
         0.03819    0.01005    0.00476   -0.00290
AFIX  43
H0F   2    0.507065    0.632171    0.635035    11.00000   -1.20000
AFIX   0
C14   1    0.842636    0.858392    0.542598    11.00000    0.02907    0.01944 =
         0.02967   -0.00161    0.00226   -0.00064
C15   1    0.822478    0.878374    0.499747    11.00000    0.03456    0.04009 =
         0.03351    0.00025    0.00620    0.00329
AFIX  93
H15A  2    0.908529    0.875596    0.480297    11.00000   -1.20000
H15B  2    0.721966    0.895488    0.488455    11.00000   -1.20000
AFIX   0
C16   1    0.999852    0.831111    0.561518    11.00000    0.03216    0.04040 =
         0.04037    0.00138    0.00309    0.00094
AFIX 137
H00U  2    1.074972    0.822567    0.537468    11.00000   -1.50000
H00V  2    0.997298    0.746876    0.578568    11.00000   -1.50000
H00W  2    1.029933    0.906076    0.580870    11.00000   -1.50000
AFIX   0
C17   1    0.571783    0.398257    0.701822    11.00000    0.03299    0.02474 =
         0.02846   -0.00262   -0.00276   -0.00238
AFIX  43
H00R  2    0.591716    0.492502    0.699519    11.00000   -1.20000
AFIX   0
C18   1    0.671619    0.314426    0.724240    11.00000    0.02858    0.03889 =
         0.02790    0.00007   -0.00576   -0.00280
AFIX  43
H00M  2    0.760785    0.351941    0.737826    11.00000   -1.20000
AFIX   0
C19   1    0.644709    0.175016    0.727476    11.00000    0.02881    0.03058 =
         0.02653    0.00314   -0.00460    0.00534
AFIX  43
H00S  2    0.715989    0.120039    0.743190    11.00000   -1.20000
AFIX   0
C20   1    0.516810    0.115927    0.708308    11.00000    0.02958    0.01974 =
         0.03006    0.00197   -0.00173    0.00429
AFIX  43
H00J  2    0.498394    0.021371    0.710260    11.00000   -1.20000
AFIX   0
C21   1    0.416809    0.201178    0.686125    11.00000    0.02337    0.02290 =
         0.01991   -0.00080    0.00146   -0.00100
C22   1    0.440773    0.341430    0.682594    11.00000    0.02407    0.01978 =
         0.02217    0.00093    0.00185    0.00240
C23   1    0.229195    0.298383    0.647657    11.00000    0.02188    0.01955 =
         0.02241    0.00194    0.00482    0.00071
C24   1    0.090139    0.310595    0.620046    11.00000    0.02031    0.02166 =
         0.02969    0.00009    0.00189    0.00126
C25   1    0.085231    0.404892    0.588478    11.00000    0.02316    0.03306 =
         0.03231    0.00536   -0.00141   -0.00470
AFIX  43
H25   2    0.171797    0.463134    0.585242    11.00000   -1.20000
AFIX   0
C26   1   -0.048900    0.423999    0.557917    11.00000    0.02736    0.03024 =
         0.03601    0.00611   -0.00237   -0.00500
AFIX  23
H00N  2   -0.023439    0.383872    0.528863    11.00000   -1.20000
H00O  2   -0.066454    0.522031    0.553488    11.00000   -1.20000
AFIX   0
C27   1   -0.196045    0.360009    0.575167    11.00000    0.02561    0.03391 =
         0.02966    0.00318   -0.00082   -0.00298
AFIX  13
H0T   2   -0.229354    0.414708    0.601261    11.00000   -1.20000
AFIX   0
C28   1   -0.163464    0.217213    0.592003    11.00000    0.02429    0.02460 =
         0.04054    0.00214   -0.00129   -0.00180
AFIX  23
H00A  2   -0.260386    0.177612    0.603585    11.00000   -1.20000
H00B  2   -0.128273    0.160298    0.567056    11.00000   -1.20000
AFIX   0
C29   1   -0.041191    0.214920    0.628244    11.00000    0.02674    0.02498 =
         0.03720    0.00658   -0.00260   -0.00304
AFIX  23
H00I  2   -0.090580    0.238410    0.656714    11.00000   -1.20000
H00K  2    0.000324    0.121945    0.630875    11.00000   -1.20000
AFIX   0
C30   1   -0.330498    0.360007    0.542752    11.00000    0.02398    0.03028 =
         0.03247   -0.00223   -0.00303    0.00101
C31   1   -0.312670    0.384374    0.499858    11.00000    0.02756    0.06374 =
         0.03691    0.00282   -0.00613    0.00213
AFIX  93
H1A   2   -0.400353    0.387725    0.481023    11.00000   -1.20000
H1B   2   -0.212254    0.398425    0.488057    11.00000   -1.20000
AFIX   0
C32   1   -0.486595    0.337760    0.561851    11.00000    0.02745    0.03976 =
         0.04480    0.00276   -0.00304    0.00091
AFIX 137
H01A  2   -0.563729    0.338574    0.538165    11.00000   -1.50000
H01B  2   -0.509803    0.409923    0.583025    11.00000   -1.50000
H01C  2   -0.489189    0.250112    0.576956    11.00000   -1.50000
AFIX   0
N1    3    0.222344    0.674927    0.659454    11.00000    0.02470    0.01749 =
         0.03157    0.00069    0.00189    0.00149
AFIX  43
H1    2    0.263756    0.595098    0.654418    11.00000   -1.20000
AFIX   0

N2    3    0.191020    0.900087    0.658278    11.00000    0.02487    0.02160 =
         0.02442    0.00166    0.00235   -0.00163
N3    3    0.278996    0.177672    0.664101    11.00000    0.02057    0.01848 =
         0.02730    0.00165   -0.00152   -0.00320
AFIX  43
H3    2    0.232195    0.099122    0.661257    11.00000   -1.20000
AFIX   0
N4    3    0.322340    0.399780    0.658677    11.00000    0.02289    0.01934 =
         0.02669   -0.00059    0.00053    0.00049
HKLF 4


REM  test_b.res in P2(1)2(1)2(1)
REM wR2 = 0.0997, GooF = S = 1.050, Restrained GooF = 1.050 for all data
REM R1 = 0.0421 for 3582 Fo > 4sig(Fo) and 0.0633 for all 4726 data
REM 327 parameters refined using 0 restraints

END

WGHT      0.0407      0.4882

REM Instructions for potential hydrogen bonds
HTAB N1 N4
HTAB N3 N2_$1

REM Highest difference peak  0.171,  deepest hole -0.195,  1-sigma level  0.036
Q1    1   0.6770  0.7678  0.5647  11.00000  0.05    0.17
Q2    1  -0.1743  0.2633  0.5618  11.00000  0.05    0.16
Q3    1   0.7092  0.7820  0.6223  11.00000  0.05    0.15
Q4    1   0.4051  1.0412  0.5948  11.00000  0.05    0.14
Q5    1   0.2272  0.9870  0.6626  11.00000  0.05    0.13
;
_shelx_res_checksum    6393

_shelx_hkl_file
;
   1   0   0    0.90    0.40
   1   0   0    0.10    0.50
  -1   0   0   -0.10    0.40
  -2   0   0  125.69    4.30
   2   0   0  123.49    4.10
  -2   0   0  128.49    4.00
  -3   0   0   -1.40    0.80
   3   0   0   -1.50    0.90
  -3   0   0    0.70    1.00
  -3   0   0    0.10    0.60
   4   0   0  497.25   12.10
  -4   0   0  479.35    8.60
  -4   0   0  502.95   11.80
  -4   0   0  516.05   12.90
   5   0   0   -0.60    2.00
  -5   0   0   -0.50    1.20
  -5   0   0    0.70    1.80
  -5   0   0    1.30    2.20
  -5   0   0    0.20    1.90
  -6   0   0   52.39    6.20
  -6   0   0   62.29    6.10
  -6   0   0   50.89    6.00
  -7   0   0   -0.30    2.90
  -7   0   0   -0.30    2.90
  -7   0   0   -2.80    2.50
  -8   0   0  671.73   21.70
  -8   0   0  682.33   22.50
  -8   0   0  710.23   20.30
  -9   0   0   -3.50    4.00
 -10   0   0   -4.00    4.80
   0  -1   0   12.80    1.00
   0   1   0   12.10    0.90
   1  -1   0    0.20    0.60
  -1  -1   0    0.30    0.70
  -1  -1   0   -0.40    0.70
  -1  -1   0    0.10    0.60
   1  -1   0    0.50    0.60
   1  -1   0    1.00    0.70
  -1   1   0    0.20    0.50
  -1   1   0    0.00    0.50
  -1   1   0    0.80    0.70
   2  -1   0   73.29    3.50
  -2  -1   0   72.09    3.70
   2  -1   0   69.79    2.90
  -2  -1   0   67.79    2.50
  -2   1   0   78.99    3.50
  -2   1   0   71.99    3.50
  -2   1   0   72.69    2.60
   3  -1   0    5.70    1.80
  -3  -1   0    1.60    1.30
  -3  -1   0    3.80    1.40
  -3  -1   0    1.80    1.40
   3  -1   0    2.60    1.40
  -3   1   0    7.30    1.70
  -3   1   0    2.60    1.00
  -3   1   0    3.10    1.60
  -4  -1   0   59.89    4.10
  -4  -1   0   66.69    5.00
  -4  -1   0   66.09    4.80
   4  -1   0   73.09    4.60
  -4   1   0   60.89    4.80
  -4   1   0   70.49    4.80
  -4   1   0   70.09    3.30
  -5  -1   0   23.00    3.80
  -5  -1   0   24.50    3.40
   5  -1   0   21.20    3.50
  -5  -1   0   21.80    2.40
  -5  -1   0   24.60    4.10
  -5   1   0   22.70    3.60
  -5   1   0   19.80    2.50
  -5   1   0   18.10    3.50
   6  -1   0  317.37   11.70
  -6  -1   0  317.57   10.90
  -6  -1   0  327.87   13.00
  -6  -1   0  340.77   12.70
  -6   1   0  348.17   12.90
  -6   1   0  332.17   12.30
  -7  -1   0   45.50    6.20
  -7  -1   0   35.80    6.10
  -7   1   0   30.20    5.30
  -7   1   0   33.00    5.70
  -8  -1   0   57.29    7.60
  -8  -1   0   42.00    7.10
  -8   1   0   49.90    7.00
  -8   1   0   38.70    6.50
  -8   1   0   48.90    7.50
  -9  -1   0    1.10    4.70
  -9   1   0    1.60    4.30
  -9   1   0    0.20    4.30
 -10  -1   0    1.70    5.20
 -10   1   0   -5.50    4.50
   0  -2   0 8615.24   91.99
   0  -2   0 8605.34   93.59
   0   2   0 8961.10   97.79
   0   2   0 9093.69   96.09
  -1  -2   0    6.70    1.30
  -1   2   0    2.00    1.00
   1   2   0    2.70    1.10
   2  -2   0  442.76    8.40
  -2  -2   0  455.35    9.80
   2  -2   0  439.66    9.80
  -2  -2   0  451.15   10.40
  -2   2   0  448.36    9.80
  -2   2   0  451.55   10.30
  -3  -2   0    6.90    2.30
   3  -2   0    8.50    1.80
  -3  -2   0    3.80    1.20
  -3   2   0    5.80    1.50
  -3   2   0    6.50    1.70
  -3   2   0    3.10    1.60
   4  -2   0    0.30    1.70
  -4  -2   0    0.30    1.70
  -4  -2   0    0.80    1.80
   4  -2   0    1.30    1.80
  -4  -2   0   -1.40    1.40
  -4   2   0    6.30    2.30
  -4   2   0   -0.60    1.10
  -4   2   0    3.60    2.00
  -5  -2   0   -2.80    1.50
   5  -2   0    2.00    2.10
  -5  -2   0    0.20    1.70
   5  -2   0    6.50    2.70
  -5  -2   0    4.10    2.60
  -5   2   0    3.60    1.60
  -5   2   0    2.50    2.00
  -5   2   0    2.80    2.20
  -6  -2   0    2.30    2.50
  -6  -2   0    3.70    2.60
   6  -2   0    4.80    2.70
  -6   2   0    4.00    3.00
  -6   2   0    4.20    2.90
  -7  -2   0    4.10    3.00
   7  -2   0    2.00    3.10
  -7  -2   0    6.30    3.90
  -7   2   0   13.10    4.40
  -7   2   0    7.70    3.60
  -8  -2   0    1.20    3.70
  -8  -2   0   -0.40    3.30
   8  -2   0    6.80    4.50
  -8   2   0    9.60    4.50
  -8   2   0    8.60    4.60
  -9  -2   0    7.80    4.60
  -9  -2   0    3.50    4.60
  -9   2   0   -1.70    4.50
 -10  -2   0   -7.00    4.50
 -10  -2   0    0.70    5.10
 -10   2   0    0.90    5.10
 -10   2   0   -4.90    5.40
   0  -3   0    0.80    0.90
   0  -3   0    1.90    1.10
   0   3   0    0.00    1.00
   0   3   0   -1.00    0.80
  -1  -3   0   62.59    4.10
   1  -3   0   57.09    3.60
  -2  -3   0  401.16    9.80
   2  -3   0  396.76   10.00
  -2  -3   0  401.36   10.80
   2  -3   0  384.46    8.30
   2   3   0  385.76   10.20
  -2   3   0  378.36    9.80
  -2   3   0  398.86   10.30
  -3  -3   0   20.80    3.10
   3  -3   0   26.40    3.50
   3  -3   0   23.70    2.70
  -3  -3   0   23.30    3.50
  -3   3   0   15.30    2.80
  -3   3   0   21.40    3.40
  -4  -3   0  404.66   13.00
  -4  -3   0  413.76   12.40
  -4  -3   0  407.66    7.90
   4  -3   0  418.06   12.40
   4  -3   0  415.06   10.70
  -4   3   0  419.06   12.40
  -4   3   0  422.86   12.90
   5  -3   0    4.00    2.50
  -5  -3   0    1.50    2.10
   5  -3   0    1.00    2.10
  -5  -3   0    0.30    1.80
  -5  -3   0    6.70    2.60
  -5   3   0    4.40    2.70
  -5   3   0    0.60    2.20
  -6  -3   0    0.80    2.90
   6  -3   0    2.30    2.90
  -6  -3   0   -2.70    1.70
  -6  -3   0   -1.00    2.10
   6  -3   0    1.20    2.50
  -6   3   0    0.10    2.50
  -6   3   0    3.00    3.00
  -7  -3   0   21.90    4.90
   7  -3   0   17.30    4.20
  -7  -3   0   21.10    5.20
  -7  -3   0   30.60    5.90
  -7   3   0   41.50    6.10
  -8  -3   0   48.90    8.00
   8  -3   0   38.30    6.50
  -8  -3   0   32.50    6.00
  -8   3   0   45.00    7.30
  -8   3   0   46.50    7.50
  -9  -3   0   26.60    6.90
  -9  -3   0   15.20    6.00
  -9   3   0   12.20    5.60
 -10  -3   0   14.30    6.70
 -10  -3   0    6.00    5.80
 -10   3   0    9.20    6.40
   0  -4   0 6520.45   76.99
   0  -4   0 6440.06   73.49
   0   4   0 6654.93   78.09
   0   4   0 6589.34   74.49
   1  -4   0    7.90    2.10
   1  -4   0    7.90    1.60
  -1  -4   0    7.40    1.90
  -1  -4   0    4.30    2.10
  -1   4   0    8.00    2.00
  -1   4   0    4.90    1.90
   1   4   0   10.90    2.40
   1   4   0    7.30    1.30
   2  -4   0   43.10    4.40
  -2  -4   0   52.89    5.10
   2  -4   0   54.99    3.50
  -2  -4   0   49.50    4.40
  -2   4   0   51.09    4.60
   2   4   0   45.60    4.50
  -2   4   0   56.49    4.40
   3  -4   0   -1.90    1.30
  -3  -4   0    2.90    2.10
   3  -4   0    2.30    1.70
  -3  -4   0    0.10    1.70
  -3   4   0   -0.10    1.50
  -3   4   0   -1.40    1.90
  -4  -4   0   56.89    6.20
   4  -4   0   52.49    4.10
   4  -4   0   60.79    5.90
  -4  -4   0   55.79    5.70
  -4   4   0   62.19    5.30
  -4   4   0   62.89    6.10
   5  -4   0   -0.40    2.00
  -5  -4   0    1.30    2.70
   5  -4   0   -1.20    2.40
  -5  -4   0    0.60    2.50
  -5   4   0    2.50    2.20
  -5   4   0    4.30    3.10
   6  -4   0   84.59    8.20
  -6  -4   0   90.29    8.90
   6  -4   0   88.29    6.80
  -6  -4   0   88.19    8.20
  -6  -4   0  107.69    7.90
  -6   4   0   92.49    8.50
  -6   4   0  100.69    8.00
   7  -4   0    4.00    3.90
   7  -4   0   -0.50    3.60
  -7  -4   0    3.40    3.10
  -7  -4   0   -1.00    3.20
  -7  -4   0    3.00    3.80
  -7   4   0    1.40    3.60
  -7   4   0   -1.40    3.70
  -8  -4   0   62.39    8.80
  -8  -4   0   71.29    8.90
   8  -4   0   75.69    9.90
  -8   4   0   71.79    9.10
  -9  -4   0   -3.00    4.60
  -9  -4   0   -5.60    4.40
  -9   4   0    2.40    5.30
   0  -5   0   -0.40    1.20
   0  -5   0    0.30    1.90
   0   5   0   -0.20    2.00
   0   5   0   -0.50    1.30
  -1  -5   0   -0.20    2.20
   1  -5   0    4.30    1.90
  -1  -5   0    1.70    1.70
   1  -5   0    1.70    1.40
   1   5   0    1.60    2.10
  -1   5   0    1.00    1.90
   1   5   0    1.50    1.30
  -1   5   0   -1.00    1.80
   2  -5   0  249.38    7.70
  -2  -5   0  242.18    8.80
   2  -5   0  255.17    9.70
  -2  -5   0  241.68   10.20
  -2   5   0  249.18    9.30
   2   5   0  261.27   10.10
  -2   5   0  260.77    9.60
   3  -5   0   12.30    3.20
   3  -5   0   10.50    2.40
  -3  -5   0    9.10    2.90
  -3  -5   0    4.00    2.70
  -3   5   0    7.20    2.70
  -3   5   0    5.40    3.10
   4  -5   0   26.10    4.40
  -4  -5   0   25.90    4.50
  -4  -5   0   15.90    4.20
   4  -5   0   19.70    3.30
  -4   5   0   20.10    4.30
  -4   5   0   23.40    4.00
  -5  -5   0   -0.70    2.80
  -5  -5   0    0.70    2.40
   5  -5   0   -3.10    2.30
   5  -5   0    0.40    2.20
  -5   5   0   -1.50    2.10
  -5   5   0   -0.40    3.00
   6  -5   0   80.49    7.70
  -6  -5   0   87.79    9.50
   6  -5   0   78.39    8.30
  -6  -5   0   83.39    8.60
  -6  -5   0   73.19    7.90
  -6   5   0   76.89    8.30
  -6   5   0   85.69    8.60
  -7  -5   0   -2.80    4.00
   7  -5   0   -1.70    3.90
  -7  -5   0    2.30    3.30
  -7  -5   0    4.90    3.90
  -7   5   0    3.70    4.50
  -7   5   0    4.80    3.40
  -8  -5   0  271.17   15.90
  -8  -5   0  244.58   14.60
   8  -5   0  252.17   14.70
  -8   5   0  276.67   15.70
  -9  -5   0   -1.50    5.30
  -9  -5   0    2.70    5.20
  -9   5   0    2.70    5.50
   0  -6   0  458.75   11.50
   0  -6   0  470.25   14.00
   0   6   0  493.25   14.50
   0   6   0  491.45   11.60
  -1  -6   0   15.30    3.20
   1  -6   0   26.60    4.30
   1  -6   0   19.40    2.90
  -1  -6   0   21.40    4.10
  -1   6   0   23.40    3.50
   1   6   0   19.60    3.60
  -1   6   0   24.00    4.10
   2  -6   0  132.19    6.10
  -2  -6   0  146.69    8.60
  -2  -6   0  138.89    7.30
   2  -6   0  139.49    8.00
   2   6   0  121.59    7.70
  -2   6   0  146.69    7.90
  -2   6   0  130.29    7.40
  -3  -6   0    2.60    2.40
   3  -6   0    2.90    2.10
   3  -6   0   -0.60    2.40
  -3  -6   0   -1.00    2.60
  -3   6   0   -1.70    2.20
  -3   6   0   -1.10    2.10
   3   6   0    0.10    2.50
   4  -6   0    4.20    3.30
  -4  -6   0    6.80    3.30
  -4  -6   0    3.70    3.30
  -4   6   0    4.90    3.20
  -4   6   0    6.00    3.10
   5  -6   0   30.40    5.60
  -5  -6   0    4.40    3.10
  -5  -6   0    5.50    3.80
  -5   6   0   14.40    4.40
   6  -6   0    1.00    3.80
  -6  -6   0   -2.00    2.80
  -6  -6   0   -4.90    3.70
  -6   6   0    1.70    3.60
  -6   6   0   -1.70    3.70
  -7  -6   0    4.70    4.10
   7  -6   0    4.30    4.90
  -7  -6   0    8.00    4.90
  -7   6   0    0.10    4.80
   8  -6   0   60.09    9.00
  -8  -6   0   75.29   10.20
  -8  -6   0   62.59    9.90
  -8   6   0   55.39    8.90
  -9  -6   0   20.30    6.80
  -9  -6   0   24.30    8.10
  -9   6   0    7.00    6.70
   0  -7   0   -2.10    2.30
   0  -7   0   -0.80    1.80
   0   7   0   -0.90    2.40
   1  -7   0    2.00    2.00
   1  -7   0    0.30    2.00
  -1  -7   0   -2.30    1.90
  -1  -7   0    1.40    2.60
  -1   7   0   -2.60    2.40
   1   7   0    3.30    2.50
  -1   7   0    1.50    2.40
  -2  -7   0   17.90    3.70
   2  -7   0   20.20    4.60
  -2  -7   0   19.50    5.00
  -2   7   0   32.80    5.10
   2   7   0   25.60    4.60
  -2   7   0   20.40    4.30
  -3  -7   0   -3.80    3.10
   3  -7   0    1.60    2.90
  -3  -7   0    1.70    2.50
  -3   7   0    1.70    3.30
   3   7   0    5.70    3.40
  -3   7   0    4.70    3.30
   4  -7   0  223.48   11.80
  -4  -7   0  224.48   11.40
  -4  -7   0  227.48   12.80
  -4   7   0  224.18   11.70
  -4   7   0  224.38   11.80
  -5  -7   0    6.00    3.70
   5  -7   0    4.80    4.00
  -5  -7   0    7.00    3.80
  -5   7   0    6.10    3.90
  -5   7   0    5.00    3.80
   6  -7   0   44.70    7.60
  -6  -7   0   53.29    8.30
  -6  -7   0   39.50    6.60
  -6   7   0   48.20    7.50
  -6   7   0   57.49    8.00
   7  -7   0    4.80    4.90
  -7  -7   0    9.40    5.40
  -7  -7   0   -3.40    4.70
  -7   7   0    3.80    5.00
  -8  -7   0   43.50    9.30
  -8  -7   0   52.19    9.20
   8  -7   0   38.70    8.30
  -8   7   0   51.59    9.50
   0  -8   0  253.57   12.20
   0   8   0  290.87   13.30
  -1  -8   0    9.10    4.20
  -1  -8   0    3.40    2.80
   1  -8   0    6.90    3.30
  -1   8   0    7.20    3.90
   1   8   0    5.60    3.60
  -2  -8   0    5.60    3.90
   2  -8   0   -3.90    2.90
  -2  -8   0    2.10    3.00
  -2   8   0   -1.60    2.70
   2   8   0    2.50    3.40
  -2   8   0    7.00    3.30
  -3  -8   0   12.40    4.90
  -3  -8   0   14.50    4.30
   3  -8   0   11.00    4.10
  -3   8   0   13.30    4.10
   3   8   0   18.20    5.20
  -3   8   0   21.00    4.60
  -4  -8   0    7.20    5.10
   4  -8   0    6.10    3.90
  -4  -8   0    9.20    3.90
  -4   8   0   11.00    4.30
  -4   8   0   10.10    4.60
  -5  -8   0   -0.50    4.40
  -5  -8   0   -1.90    3.70
   5  -8   0   -2.80    3.90
  -5   8   0    4.10    4.40
  -5   8   0    4.20    4.40
   6  -8   0  182.98   13.20
  -6  -8   0  178.08   12.80
  -6  -8   0  214.68   15.00
  -6   8   0  174.28   13.10
  -7  -8   0   -3.40    4.30
   7  -8   0    3.80    5.70
  -7  -8   0   -1.60    5.70
  -7   8   0    2.50    5.90
   0  -9   0   -1.60    3.00
   0   9   0    2.40    3.30
   1  -9   0    3.80    3.60
  -1  -9   0   -3.50    3.40
   1   9   0    2.20    3.90
  -1   9   0   -4.00    3.40
   2  -9   0   -4.80    3.20
  -2  -9   0    4.50    4.20
   2   9   0    2.60    4.30
  -2   9   0   -0.70    3.60
   3  -9   0   21.60    5.90
  -3  -9   0   23.70    5.20
  -3  -9   0   25.70    6.80
   3   9   0   17.00    5.60
  -3   9   0   25.20    5.90
  -3   9   0   20.80    5.60
  -4  -9   0   -1.70    4.40
  -4  -9   0    3.50    4.00
   4  -9   0   -6.60    3.80
  -4   9   0   -1.90    4.20
   5  -9   0   -1.80    4.60
  -5  -9   0    3.90    4.60
  -5  -9   0    5.20    5.30
  -5   9   0    4.50    5.90
   6  -9   0    2.00    5.20
  -6  -9   0    2.50    5.00
  -6  -9   0    2.10    6.00
  -6   9   0    5.60    5.80
   0 -10   0  397.76   17.50
   1 -10   0    5.00    4.60
  -1 -10   0   -2.00    4.20
   2 -10   0    4.40    4.90
  -2 -10   0    3.20    4.80
   3 -10   0    4.30    4.80
  -3 -10   0   -1.10    4.80
   4 -10   0   -1.30    4.40
  -4 -10   0    0.90    5.40
  -4  10   0    7.40    6.10
   5 -10   0    0.30    5.00
  -5 -10   0   -1.10    5.00
  -5 -10   0    2.40    5.90
  -5  10   0   -2.30    5.30
   0 -11   0    4.90    5.10
   1 -11   0    0.70    4.70
  -1 -11   0    5.30    5.30
   2 -11   0    1.40    5.30
  -2 -11   0    0.30    5.30
  -3 -11   0   16.30    6.90
   3 -11   0   -0.30    5.00
   4 -11   0    9.90    6.50
  -4 -11   0   16.10    7.30
 -10   0   1   -1.60    4.70
  -9   0   1    2.80    4.50
  -8   0   1   71.39    8.40
  -8   0   1   73.29    7.70
  -8   0   1   53.29    7.90
  -7   0   1    1.80    2.30
  -7   0   1   -0.40    2.70
  -7   0   1    2.60    2.90
  -6   0   1   -0.20    2.40
  -6   0   1   -0.50    1.80
  -6   0   1    1.10    2.50
  -5   0   1   26.70    2.70
  -5   0   1   22.70    3.60
  -5   0   1   33.20    4.00
  -5   0   1   29.70    4.40
  -4   0   1   -0.70    1.00
  -4   0   1    2.50    1.80
  -4   0   1    2.00    1.60
   3   0  -1    6.50    1.50
  -3   0   1    8.50    1.80
  -3   0   1   10.80    1.40
  -3   0   1    8.30    1.80
  -2   0   1    0.40    0.80
   2   0  -1    0.60    0.90
  -2   0   1    1.20    0.90
  -2   0   1   -0.60    0.60
   1   0  -1    0.90    0.50
  -1   0   1    1.50    0.50
   1   0   1    0.50    0.50
  -1   0  -1    0.20    0.50
   1   0   1    0.30    0.50
  -2   0  -1    0.70    0.80
   2   0   1   -0.30    1.00
  -2   0  -1    0.70    0.80
   3   0   1    7.30    1.70
  -3   0  -1   15.20    2.20
  -3   0  -1   10.30    1.80
  -3   0  -1   10.20    1.20
   4   0   1    2.40    1.80
  -4   0  -1    3.20    1.90
  -4   0  -1    2.70    2.00
  -4   0  -1    3.00    0.90
  -5   0  -1   24.80    3.80
  -5   0  -1   32.60    4.00
   5   0   1   32.20    4.20
  -6   0  -1   -1.10    2.10
  -6   0  -1    2.50    2.20
  -6   0  -1   -1.50    2.20
  -7   0  -1   -0.40    2.40
  -7   0  -1   -1.20    2.60
  -7   0  -1    5.40    3.30
  -8   0  -1   78.39    8.10
  -8   0  -1   55.09    7.60
  -8   0  -1   71.99    9.00
  -9   0  -1    2.90    4.80
 -10   0  -1    1.80    5.40
 -10  -1   1    6.30    5.10
 -10  -1   1    9.30    6.10
 -10   1   1    3.30    5.00
  -9  -1   1   29.70    7.10
  -9   1   1   26.00    6.20
  -9   1   1   31.00    7.00
  -8  -1   1   50.19    7.50
  -8  -1   1   36.10    6.50
  -8   1   1   51.39    7.20
  -8   1   1   42.00    7.20
  -8   1   1   40.50    6.40
  -7  -1   1  179.38   10.90
  -7  -1   1  145.89    9.90
  -7   1   1  183.88   10.10
  -7   1   1  180.48   10.20
  -6  -1   1    5.70    2.50
  -6  -1   1    5.90    3.20
  -6  -1   1    1.70    2.10
   6  -1  -1    3.00    2.50
  -6   1   1    0.20    2.80
  -6   1   1    4.20    2.40
  -5  -1   1  136.49    6.40
   5  -1  -1  121.09    6.50
  -5  -1   1  123.59    4.90
  -5  -1   1  129.99    7.30
  -5  -1   1  129.99    7.50
  -5   1   1  125.59    7.20
  -5   1   1  125.69    6.90
  -5   1   1  122.09    4.80
   4  -1  -1  170.58    6.70
  -4  -1   1  155.88    7.40
  -4  -1   1  181.18    7.50
  -4  -1   1  161.68    6.00
  -4   1   1  175.38    5.30
  -4   1   1  185.88    7.60
  -4   1   1  164.88    7.30
  -3  -1   1  297.27    8.70
   3  -1  -1  329.17    8.00
  -3  -1   1  299.17    7.00
  -3  -1   1  316.27    8.80
   3  -1  -1  312.97    8.50
  -3   1   1  310.17    6.60
  -3   1   1  305.87    8.40
  -3   1   1  303.37    8.60
   2  -1  -1   49.99    2.90
  -2  -1   1   58.19    2.30
  -2  -1   1   59.19    3.30
   2  -1  -1   56.29    2.70
  -2   1   1   54.49    3.20
  -2   1   1   54.09    2.40
  -2   1   1   53.79    2.90
  -1  -1   1   38.90    2.00
   1  -1  -1   34.10    1.90
   1  -1  -1   40.10    2.00
  -1  -1   1   38.40    2.10
  -1  -1   1   38.00    2.10
  -1   1   1   34.00    2.00
  -1   1   1   40.10    2.00
  -1   1   1   37.00    1.80
   0  -1   1    2.40    0.60
   0  -1  -1    2.50    0.50
   0   1   1    3.30    0.60
   0   1  -1    2.80    0.60
   1  -1   1   36.40    1.80
   1  -1   1   36.60    2.10
   1  -1   1   39.20    2.00
  -1  -1  -1   35.70    2.10
  -1   1  -1   40.60    2.10
  -1   1  -1   38.30    2.10
  -2  -1  -1   48.90    3.10
   2  -1   1   55.99    2.80
  -2  -1  -1   55.49    3.30
  -2  -1  -1   57.29    2.40
   2  -1   1   55.79    3.20
  -2   1  -1   57.29    3.10
  -2   1  -1   49.70    2.90
  -2   1  -1   52.49    2.10
  -3  -1  -1  295.77    8.70
  -3  -1  -1  306.67    7.10
  -3  -1  -1  304.27    8.70
   3  -1   1  302.07    8.50
   3  -1   1  307.57    7.90
  -3   1  -1  284.77    8.20
  -3   1  -1  302.07    5.80
  -3   1  -1  307.87    8.50
   4  -1   1  162.38    6.80
  -4  -1  -1  182.98    7.90
  -4  -1  -1  164.08    7.30
  -4  -1  -1  182.38    6.50
  -4   1  -1  183.48    7.50
  -4   1  -1  169.48    7.20
  -4   1  -1  172.48    4.70
   5  -1   1  114.89    6.50
  -5  -1  -1  132.09    6.20
  -5  -1  -1  141.59    7.80
  -5  -1  -1  123.39    7.20
  -5   1  -1  118.89    7.00
  -5   1  -1  131.59    7.10
  -6  -1  -1    4.80    2.40
   6  -1   1   -1.00    2.20
  -6  -1  -1    1.50    2.60
  -6  -1  -1    3.00    2.60
  -6   1  -1   -0.10    2.30
  -6   1  -1    0.00    2.70
  -7  -1  -1  193.18   10.70
  -7  -1  -1  179.78   10.80
   7  -1   1  169.78    9.80
  -7  -1  -1  174.38    9.80
  -7   1  -1  163.88    9.80
  -7   1  -1  166.28    9.90
  -8  -1  -1   37.50    6.60
  -8  -1  -1   52.09    7.90
  -8   1  -1   32.70    6.10
  -8   1  -1   42.70    6.60
  -8   1  -1   33.70    6.40
  -9  -1  -1   24.10    6.60
  -9   1  -1   22.00    6.00
  -9   1  -1   25.00    6.80
 -10  -1  -1    0.80    5.00
 -10   1  -1    0.30    5.20
 -10  -2   1    6.60    6.00
 -10  -2   1   -2.50    4.20
 -10   2   1   -0.50    5.20
 -10   2   1   12.00    6.50
  -9  -2   1   11.80    5.10
  -9  -2   1    0.10    4.30
  -9   2   1    3.50    4.40
  -9   2   1   -1.80    4.20
  -8  -2   1  352.36   16.20
  -8  -2   1  381.26   16.10
  -8  -2   1  380.86   17.40
  -8   2   1  380.16   16.50
  -8   2   1  376.56   15.90
  -7  -2   1   50.19    6.60
  -7  -2   1   41.10    6.60
  -7  -2   1   42.40    6.50
   7  -2  -1   76.19    7.50
  -7   2   1   49.80    6.50
   6  -2  -1   50.89    5.60
  -6  -2   1   45.40    6.00
  -6  -2   1   56.09    6.80
  -6   2   1   43.50    5.50
  -6   2   1   54.69    6.10
   5  -2  -1   47.10    4.80
  -5  -2   1   43.90    5.00
  -5  -2   1   38.40    3.90
   5  -2  -1   75.19    6.00
  -5  -2   1   43.00    5.20
  -5   2   1   45.00    4.80
  -5   2   1   41.10    3.70
  -4  -2   1   78.99    5.80
   4  -2  -1   76.29    4.70
  -4  -2   1   81.59    5.30
   4  -2  -1   80.69    5.30
  -4  -2   1   81.99    5.70
  -4  -2   1   73.59    3.90
  -4   2   1   77.69    5.10
  -4   2   1   76.29    5.40
  -4   2   1   74.19    3.90
  -3  -2   1  374.76    7.00
   3  -2  -1  380.46   10.00
  -3  -2   1  365.96    9.90
  -3  -2   1  379.56   10.80
   3  -2  -1  381.96    8.60
  -3   2   1  377.36    8.40
  -3   2   1  384.26   10.00
  -3   2   1  361.96   10.30
  -2  -2   1    2.90    1.20
   2  -2  -1    3.70    1.20
   2  -2  -1    3.80    1.40
  -2  -2   1    4.10    1.40
  -2   2   1    4.00    1.20
  -2   2   1    3.90    1.50
  -2   2   1    4.60    1.30
   1  -2  -1  946.21   14.40
   1  -2  -1  960.50   12.60
  -1  -2   1  950.00   14.50
  -1  -2   1  939.41   15.20
   1   2  -1  970.50   15.20
  -1   2   1  947.11   14.80
  -1   2   1  956.50   14.40
   0  -2   1 1843.32   23.80
   0  -2   1 1907.71   22.80
   0  -2  -1 1793.62   23.40
   0  -2  -1 1804.32   21.80
   0   2   1 1851.81   23.60
   0   2   1 1879.21   22.60
   0   2  -1 1866.91   22.20
   0   2  -1 1874.71   24.20
   1  -2   1  944.91   13.30
   1  -2   1  936.11   14.70
  -1  -2  -1  941.21   13.90
  -1  -2  -1  928.81   14.90
   1   2   1  939.11   14.70
  -1   2  -1  962.30   14.60
  -1   2  -1  948.61   14.80
  -2  -2  -1    5.40    1.40
   2  -2   1    8.90    1.80
  -2  -2  -1    2.30    1.30
   2  -2   1    5.00    1.30
  -2   2  -1    4.90    1.60
  -2   2  -1    6.20    1.50
  -3  -2  -1  367.56   10.40
   3  -2   1  382.66    9.00
  -3  -2  -1  361.96    7.20
   3  -2   1  375.56   10.10
  -3   2  -1  376.06   10.00
  -3   2  -1  358.26   10.10
   4  -2   1   71.89    5.30
   4  -2   1   64.19    4.50
  -4  -2  -1   69.49    5.30
  -4  -2  -1   65.79    3.80
  -4  -2  -1   74.09    5.50
  -4   2  -1   67.89    5.00
  -4   2  -1   75.99    5.40
  -4   2  -1   69.49    3.70
   5  -2   1   54.49    5.70
  -5  -2  -1   47.60    5.20
  -5  -2  -1   53.59    4.40
   5  -2   1   52.29    5.10
  -5  -2  -1   43.90    5.40
  -5   2  -1   44.60    5.00
  -5   2  -1   38.60    4.90
  -6  -2  -1   48.80    6.10
  -6  -2  -1   39.90    5.70
   6  -2   1   44.70    5.40
  -6   2  -1   40.30    5.50
  -6   2  -1   42.30    5.60
   7  -2   1   48.00    6.40
  -7  -2  -1   49.10    7.00
  -7  -2  -1   49.60    6.90
  -7   2  -1   38.90    6.10
  -7   2  -1   43.50    6.30
   8  -2   1  333.57   14.60
  -8  -2  -1  373.86   17.00
  -8  -2  -1  387.86   17.20
  -8   2  -1  335.67   15.80
  -8   2  -1  398.06   16.50
  -9  -2  -1    1.00    4.10
  -9   2  -1    6.80    4.80
 -10  -2  -1    4.30    5.70
 -10  -2  -1    7.10    4.90
 -10   2  -1   12.30    5.90
 -10   2  -1    3.80    5.80
 -10  -3   1   17.10    7.40
 -10  -3   1   13.50    5.90
 -10   3   1   16.70    7.40
  -9  -3   1  159.28   12.40
  -9  -3   1  163.48   14.60
  -9   3   1  164.08   12.80
   8  -3  -1   82.19    8.60
  -8  -3   1   83.19   10.00
  -8  -3   1   78.99    9.00
  -8   3   1   87.09    9.60
  -8   3   1   91.39    9.70
  -7  -3   1  238.68   12.70
  -7  -3   1  263.97   13.90
   7  -3  -1  231.58   11.10
  -7  -3   1  237.28   12.20
  -7   3   1  238.88   12.40
  -7   3   1  239.18   12.50
   6  -3  -1   46.30    5.30
   6  -3  -1   52.09    6.20
  -6  -3   1   56.69    7.00
  -6  -3   1   47.00    6.00
  -6  -3   1   40.80    5.40
  -6   3   1   42.70    5.90
  -6   3   1   39.20    5.40
   5  -3  -1   94.79    5.90
  -5  -3   1   82.69    7.00
  -5  -3   1   88.69    6.60
   5  -3  -1  103.29    7.00
  -5  -3   1   78.89    7.10
  -5   3   1   88.69    6.40
  -5   3   1   75.99    4.90
  -5   3   1   95.39    7.20
  -4  -3   1   41.50    4.60
  -4  -3   1   40.80    4.90
  -4  -3   1   38.80    2.90
   3  -3  -1   52.39    3.40
  -3  -3   1   48.90    4.40
  -3  -3   1   56.29    5.40
   3  -3  -1   48.60    4.40
  -3   3   1   47.90    4.70
  -3   3   1   46.00    4.30
  -3   3   1   51.89    3.70
   2  -3  -1  234.98    5.90
  -2  -3   1  236.58    7.50
  -2  -3   1  250.67    8.40
   2  -3  -1  220.18    7.30
  -2   3   1  224.98    7.20
   2   3  -1  247.18    8.00
  -2   3   1  230.58    7.80
   1  -3  -1  967.20   16.20
   1  -3  -1  987.40   13.80
  -1  -3   1  960.00   15.80
  -1  -3   1  919.21   16.90
  -1   3   1  973.10   16.30
   1   3  -1  979.00   17.00
  -1   3   1 1014.40   16.40
   0  -3  -1    4.00    1.20
   0  -3  -1    5.10    1.20
   0  -3   1    5.90    1.30
   0  -3   1    3.00    1.30
   0   3  -1    5.80    1.20
   0   3   1    4.50    1.30
   0   3  -1    6.10    1.60
   0   3   1    5.70    1.30
  -1  -3  -1  989.60   15.50
  -1  -3  -1  978.70   17.10
   1  -3   1  953.30   16.50
   1  -3   1  950.50   14.60
  -1   3  -1  975.30   15.90
   1   3   1  964.10   13.60
   1   3   1  987.00   16.60
  -1   3  -1  951.80   16.50
  -2  -3  -1  215.28    7.70
   2  -3   1  229.68    6.30
  -2  -3  -1  220.48    7.00
   2  -3   1  229.28    7.50
  -2   3  -1  229.38    7.60
  -2   3  -1  230.38    7.50
  -3  -3  -1   58.79    4.20
  -3  -3  -1   43.80    4.50
   3  -3   1   46.00    3.50
  -3  -3  -1   45.60    2.30
   3  -3   1   51.19    4.30
  -3   3  -1   41.90    4.20
  -3   3  -1   48.60    4.60
   4  -3   1   32.10    3.70
  -4  -3  -1   25.40    2.40
  -4  -3  -1   21.70    3.90
  -4   3  -1   33.90    4.20
   5  -3   1   76.09    5.50
  -5  -3  -1   86.09    7.00
  -5  -3  -1   86.29    6.80
  -5  -3  -1   89.19    6.30
   5  -3   1   81.59    6.20
  -5   3  -1   84.99    7.40
  -5   3  -1   79.89    6.20
   6  -3   1   38.00    5.00
  -6  -3  -1   42.40    5.70
  -6  -3  -1   50.09    6.70
   6  -3   1   39.20    5.80
  -6  -3  -1   48.60    6.10
  -6   3  -1   37.50    5.40
  -6   3  -1   48.70    6.10
  -7  -3  -1  231.98   12.80
  -7  -3  -1  245.48   12.30
  -7  -3  -1  232.38   12.30
   7  -3   1  250.97   11.60
  -7   3  -1  246.28   12.70
  -7   3  -1  239.38   12.50
   8  -3   1   92.79    9.10
  -8  -3  -1   77.99    8.90
  -8  -3  -1   80.09    9.80
  -8   3  -1   69.89    8.60
  -8   3  -1   83.79   12.10
  -9  -3  -1  142.79   13.60
   9  -3   1  148.59   11.60
  -9  -3  -1  157.48   12.40
  -9   3  -1  158.78   12.60
 -10  -3  -1   25.10    7.90
 -10  -3  -1   20.40    6.50
 -10   3  -1   20.50    7.10
  -9  -4   1    2.10    5.50
  -9  -4   1   -0.80    3.90
  -9   4   1    1.50    5.50
  -8  -4   1   23.40    6.10
  -8  -4   1   21.50    6.40
  -8   4   1   16.20    5.70
   7  -4  -1    3.70    3.70
  -7  -4   1    3.70    3.90
  -7  -4   1    5.00    3.90
   7  -4  -1    1.90    3.20
  -7  -4   1    4.70    4.10
  -7   4   1    2.50    3.70
  -7   4   1    0.70    3.70
  -6  -4   1   22.50    4.80
   6  -4  -1   11.70    4.00
   6  -4  -1   19.30    4.00
  -6  -4   1   20.40    5.00
  -6  -4   1   16.10    4.10
  -6   4   1   15.20    4.10
  -6   4   1   21.10    4.70
  -5  -4   1   75.59    7.60
   5  -4  -1   68.79    6.60
   5  -4  -1   71.79    5.30
  -5  -4   1   89.19    7.70
  -5   4   1   78.29    7.30
  -5   4   1   77.09    6.90
   4  -4  -1   52.59    5.50
   4  -4  -1   47.00    4.30
  -4  -4   1   48.50    5.60
  -4  -4   1   44.60    5.00
  -4   4   1   46.70    5.10
  -4   4   1   51.99    5.70
   3  -4  -1  164.78    6.00
   3  -4  -1  154.78    7.20
  -3  -4   1  169.48    7.60
  -3  -4   1  167.78    8.40
  -3   4   1  172.68    8.20
  -3   4   1  167.18    7.60
  -2  -4   1    8.20    2.30
  -2  -4   1   14.00    3.20
   2  -4  -1   10.00    2.50
   2  -4  -1   13.70    2.10
  -2   4   1    8.90    2.10
  -2   4   1   12.80    2.70
   2   4  -1   12.40    2.60
  -1  -4   1   22.40    3.30
   1  -4  -1   20.60    2.20
   1  -4  -1   20.10    2.90
  -1  -4   1   14.30    2.50
  -1   4   1   17.20    2.70
   1   4  -1   17.30    1.60
  -1   4   1   19.50    2.70
   1   4  -1   21.50    3.00
   0  -4  -1  564.84   12.80
   0  -4  -1  533.15   10.40
   0   4  -1  581.24   10.90
   0   4   1  569.04   11.10
   0   4   1  576.04   12.80
  -1  -4  -1   13.30    2.70
   1  -4   1   16.20    2.10
   1  -4   1   17.70    2.80
  -1  -4  -1   19.90    2.60
  -1   4  -1   15.40    2.50
  -1   4  -1   18.20    2.60
   1   4   1   17.30    2.70
   1   4   1   18.00    1.90
  -2  -4  -1   11.10    2.50
  -2  -4  -1   10.50    2.80
   2  -4   1   10.10    2.70
   2  -4   1    9.30    2.00
   2   4   1    9.90    2.50
  -2   4  -1   12.40    2.70
  -2   4  -1   17.30    2.90
  -3  -4  -1  168.98    8.40
   3  -4   1  156.98    6.20
  -3  -4  -1  159.08    7.30
   3  -4   1  163.18    7.60
  -3   4  -1  155.78    7.60
  -3   4  -1  161.48    7.60
   4  -4   1   45.30    5.20
   4  -4   1   46.10    4.50
  -4  -4  -1   44.70    5.40
  -4  -4  -1   47.00    5.10
  -4   4  -1   51.79    5.20
  -4   4  -1   42.00    5.10
   5  -4   1   95.49    7.20
  -5  -4  -1   86.49    6.90
   5  -4   1   83.89    5.90
  -5  -4  -1   83.99    7.00
  -5   4  -1   78.99    6.40
  -5   4  -1   75.09    7.20
  -6  -4  -1   24.00    5.00
   6  -4   1    9.20    4.10
  -6  -4  -1   12.00    3.80
   6  -4   1   18.30    4.00
  -6  -4  -1   18.60    4.50
  -6   4  -1   11.70    3.80
  -6   4  -1   12.00    4.10
   7  -4   1   10.00    4.40
  -7  -4  -1    4.90    3.40
  -7  -4  -1   -2.20    3.40
  -7  -4  -1   -0.20    3.90
   7  -4   1    1.10    3.50
  -7   4  -1    5.60    3.70
  -7   4  -1    4.30    3.80
  -8  -4  -1   24.10    6.20
   8  -4   1   33.10    6.10
  -8  -4  -1   16.20    6.20
  -8   4  -1   21.10    6.40
  -9  -4  -1    1.40    5.10
  -9  -4  -1    2.90    4.30
  -9   4  -1    9.90    6.10
  -9  -5   1   12.80    6.00
  -9  -5   1   11.60    6.60
  -9   5   1    8.90    6.60
   8  -5  -1   21.50    6.50
  -8  -5   1   32.60    7.10
  -8  -5   1   15.60    6.10
  -8   5   1   12.60    5.80
  -7  -5   1   52.49    8.70
  -7  -5   1   69.79    9.10
   7  -5  -1   58.79    7.80
  -7  -5   1   60.89    7.90
  -7   5   1   56.29    7.50
  -7   5   1   61.79    8.20
  -6  -5   1  265.37   13.00
  -6  -5   1  268.97   13.90
   6  -5  -1  271.07   13.10
  -6   5   1  268.27   12.70
  -6   5   1  270.37   13.10
   5  -5  -1    1.90    2.50
  -5  -5   1   -1.70    3.10
   5  -5  -1   -0.60    2.60
  -5  -5   1   -0.40    2.90
  -5   5   1   -2.80    3.00
  -5   5   1   -0.90    2.80
  -4  -5   1  214.18    9.90
   4  -5  -1  196.28    7.60
  -4  -5   1  202.58   10.70
   4  -5  -1  195.38    9.40
  -4   5   1  202.28   10.20
  -4   5   1  188.48    9.30
  -3  -5   1  434.66   14.40
   3  -5  -1  439.56   10.50
   3  -5  -1  426.36   13.20
  -3  -5   1  449.46   13.20
  -3   5   1  452.05   13.40
  -3   5   1  448.56   13.90
   2  -5  -1  728.33   13.50
  -2  -5   1  682.53   15.90
   2  -5  -1  704.03   16.50
  -2  -5   1  705.53   17.70
  -2   5   1  700.03   16.30
  -2   5   1  692.43   16.30
   2   5  -1  698.13   17.00
  -1  -5   1   17.70    3.50
  -1  -5   1   25.10    3.30
   1  -5  -1   19.50    3.20
   1  -5  -1   19.60    2.50
   1   5  -1   24.80    2.30
  -1   5   1   17.60    3.00
  -1   5   1   19.50    3.30
   1   5  -1   14.80    3.10
   0  -5   1    3.30    1.80
   0  -5   1    0.80    2.00
   0  -5  -1    3.50    1.70
   0  -5  -1   -1.00    1.80
   0   5  -1    2.90    1.60
   0   5   1    0.20    1.60
   0   5   1    2.20    2.00
   0   5  -1    2.90    1.90
  -1  -5  -1   21.50    3.60
   1  -5   1   17.90    3.20
   1  -5   1   17.10    2.50
  -1  -5  -1   19.10    2.80
   1   5   1   21.90    2.50
   1   5   1   26.20    3.70
  -1   5  -1   15.50    3.00
  -1   5  -1   18.20    3.30
  -2  -5  -1  701.83   15.80
  -2  -5  -1  711.23   17.80
   2  -5   1  737.73   17.20
   2  -5   1  729.73   14.40
  -2   5  -1  692.83   16.00
  -2   5  -1  691.63   16.60
   2   5   1  702.33   16.90
  -3  -5  -1  468.85   14.90
   3  -5   1  454.15   11.40
  -3  -5  -1  444.66   13.20
   3  -5   1  442.36   13.70
  -3   5  -1  449.76   13.80
  -3   5  -1  428.06   13.30
   4  -5   1  188.18    9.60
  -4  -5  -1  190.68   10.30
  -4  -5  -1  189.08    9.20
   4  -5   1  200.08    8.00
  -4   5  -1  194.28    9.60
  -4   5  -1  191.38    9.60
  -5  -5  -1   -1.40    3.50
   5  -5   1   -2.10    2.20
  -5  -5  -1    1.70    2.90
   5  -5   1    0.90    2.80
  -5   5  -1    2.20    3.20
  -5   5  -1    3.90    2.90
  -6  -5  -1  255.67   12.50
  -6  -5  -1  267.27   13.10
   6  -5   1  268.07   11.00
  -6  -5  -1  239.98   13.50
   6  -5   1  252.37   12.90
  -6   5  -1  266.77   13.30
  -6   5  -1  260.17   12.90
  -7  -5  -1   48.30    8.40
  -7  -5  -1   64.39    8.00
  -7  -5  -1   56.19    8.20
   7  -5   1   56.09    7.80
  -7   5  -1   67.89    8.50
  -7   5  -1   63.59    8.20
  -8  -5  -1   20.70    5.60
  -8  -5  -1   12.30    5.70
   8  -5   1   14.70    5.90
  -8   5  -1   27.30    6.60
  -9  -5  -1   12.10    6.00
  -9  -5  -1   10.50    6.60
  -9   5  -1   19.30    7.00
  -9  -6   1    0.10    5.40
  -9  -6   1    1.60    6.60
  -9   6   1   -1.90    6.00
  -8  -6   1   61.69    9.20
   8  -6  -1   50.59    8.60
  -8  -6   1   62.39   10.10
  -8   6   1   62.49    9.30
  -7  -6   1   99.29   10.90
   7  -6  -1   88.49    9.80
  -7  -6   1   83.99    9.70
  -7   6   1   64.69    8.60
   6  -6  -1   30.30    6.10
  -6  -6   1    6.10    3.80
  -6  -6   1    3.00    4.20
  -6   6   1   16.80    5.10
  -6   6   1    8.70    4.00
  -5  -6   1   16.10    4.50
   5  -6  -1   17.30    4.80
  -5  -6   1    8.10    4.30
  -5   6   1    5.50    3.70
  -5   6   1   12.80    4.60
  -4  -6   1   55.19    7.20
  -4  -6   1   63.99    6.80
   4  -6  -1   60.89    6.70
  -4   6   1   58.19    6.50
  -4   6   1   58.09    6.70
  -3  -6   1   12.70    3.40
  -3  -6   1   14.80    4.00
   3  -6  -1    3.60    2.80
   3  -6  -1   11.10    2.70
   3   6  -1    8.00    3.40
  -3   6   1   12.20    3.60
  -3   6   1    9.80    3.20
   2  -6  -1    5.80    2.20
  -2  -6   1    7.10    3.10
  -2  -6   1    4.50    2.40
   2  -6  -1    8.10    2.90
  -2   6   1    2.80    2.40
  -2   6   1    8.40    2.60
   2   6  -1    1.50    2.40
  -1  -6   1  602.84   16.60
  -1  -6   1  600.64   14.40
   1  -6  -1  590.64   12.60
   1  -6  -1  576.74   15.70
  -1   6   1  605.74   16.00
  -1   6   1  568.24   14.30
   1   6  -1  618.94   16.40
   0  -6   1  195.68    9.30
   0  -6  -1  209.68    7.40
   0  -6   1  218.78    8.00
   0  -6  -1  195.18    9.10
   0   6  -1  202.28    7.10
   0   6   1  221.68    9.40
   0   6  -1  220.98    9.70
   0   6   1  213.98    7.70
   1  -6   1  597.24   13.20
  -1  -6  -1  559.94   13.70
   1  -6   1  601.44   16.00
  -1  -6  -1  577.14   16.30
  -1   6  -1  608.44   16.30
   1   6   1  586.34   15.90
  -1   6  -1  627.14   14.60
  -2  -6  -1   10.10    3.30
   2  -6   1    3.10    2.10
   2  -6   1    7.20    2.40
  -2  -6  -1    6.10    2.20
  -2   6  -1    3.30    2.40
  -2   6  -1    4.50    2.50
   2   6   1    3.70    2.50
   3  -6   1    7.80    3.60
   3  -6   1   11.20    2.70
  -3  -6  -1    7.20    3.70
  -3  -6  -1   13.50    3.40
  -3   6  -1   10.50    3.20
  -3   6  -1    9.50    3.10
   4  -6   1   57.59    5.40
  -4  -6  -1   55.89    6.90
  -4  -6  -1   62.89    6.60
   4  -6   1   61.79    6.80
  -4   6  -1   61.49    6.70
  -4   6  -1   50.99    6.20
   5  -6   1    9.50    4.00
  -5  -6  -1   10.00    4.60
  -5  -6  -1   10.10    3.90
  -5   6  -1    6.80    4.10
  -5   6  -1    5.50    3.60
  -6  -6  -1    7.70    3.70
   6  -6   1    9.80    3.90
  -6  -6  -1   10.50    5.00
  -6   6  -1    3.80    3.90
  -6   6  -1    5.70    3.90
  -7  -6  -1  102.89   10.60
  -7  -6  -1   88.59   10.40
   7  -6   1   74.99    9.30
  -7   6  -1   78.39    9.80
  -8  -6  -1   67.59    9.10
  -8  -6  -1   70.79   10.80
   8  -6   1   72.29    9.70
  -8   6  -1   64.09    9.70
  -9  -6  -1    0.90    5.30
   9  -6   1   -9.90    5.40
  -9  -6  -1    2.80    7.40
  -9   6  -1   -3.60    5.80
  -8  -7   1   11.80    6.00
   8  -7  -1    8.40    6.10
  -8  -7   1   14.90    7.20
  -8   7   1   15.50    6.80
  -7  -7   1   15.00    6.20
   7  -7  -1   13.10    5.80
  -7  -7   1   26.00    6.70
  -7   7   1   26.30    6.60
   6  -7  -1   64.19    8.40
  -6  -7   1   78.69    9.40
  -6  -7   1   95.19   10.70
  -6   7   1   67.69    8.60
  -6   7   1   77.19    9.30
   5  -7  -1   52.19    7.00
  -5  -7   1   45.00    7.50
  -5  -7   1   43.00    6.90
  -5   7   1   29.00    6.20
  -5   7   1   45.50    6.70
   4  -7  -1   73.39    7.80
  -4  -7   1   66.19    7.40
  -4  -7   1   79.29    8.60
  -4   7   1   64.49    7.50
  -4   7   1   63.39    7.40
  -3  -7   1   11.60    4.40
  -3  -7   1   13.90    3.80
   3  -7  -1    8.20    3.70
  -3   7   1    9.60    3.20
  -3   7   1    8.30    3.70
   3   7  -1   11.50    3.90
  -2  -7   1  293.97   11.20
  -2  -7   1  312.97   13.50
   2  -7  -1  298.77   12.60
   2   7  -1  305.77   12.90
  -2   7   1  289.27   11.60
  -2   7   1  325.77   12.70
  -1  -7   1  123.19    7.10
   1  -7  -1  116.59    7.70
  -1  -7   1  142.39    8.90
   1  -7  -1  132.79    6.40
   1   7  -1  137.49    8.70
  -1   7   1  133.79    8.50
  -1   7   1  152.38    7.80
   0  -7   1   17.70    3.20
   0  -7  -1   17.00    3.30
   0  -7   1   19.40    4.10
   0  -7  -1   18.40    4.20
   0   7  -1   23.20    4.40
   0   7   1   29.20    4.80
  -1  -7  -1  123.69    6.90
  -1  -7  -1  136.69    8.50
   1  -7   1  132.29    6.70
   1  -7   1  128.39    8.10
  -1   7  -1  128.79    8.40
  -1   7  -1  132.79    7.10
   1   7   1  131.09    8.50
  -2  -7  -1  303.77   13.20
   2  -7   1  276.37   12.30
   2  -7   1  287.17    9.80
  -2  -7  -1  291.47   10.90
   2   7   1  309.17   12.50
  -2   7  -1  311.17   11.40
  -2   7  -1  312.97   12.60
  -3  -7  -1    9.00    3.30
   3  -7   1    6.70    3.70
  -3  -7  -1    9.80    4.10
   3   7   1    5.50    3.80
  -3   7  -1    5.90    3.50
  -3   7  -1    5.10    3.10
  -4  -7  -1   74.79    7.70
  -4  -7  -1   71.99    8.70
   4  -7   1   70.29    7.90
  -4   7  -1   83.19    8.40
  -4   7  -1   60.29    7.30
   5  -7   1   50.29    7.20
  -5  -7  -1   47.80    7.60
  -5  -7  -1   58.09    7.40
  -5   7  -1   40.70    6.40
  -5   7  -1   44.00    6.90
  -6  -7  -1   90.29   10.50
  -6  -7  -1   73.69    8.80
   6  -7   1   76.89    9.20
  -6   7  -1   67.59    8.40
  -6   7  -1   63.99    8.80
  -7  -7  -1   21.60    6.90
  -7  -7  -1   20.90    6.20
   7  -7   1   14.00    5.60
  -7   7  -1   12.20    5.70
  -8  -7  -1   16.20    6.80
  -8  -7  -1   11.40    5.60
   8  -7   1    7.30    6.20
  -8   7  -1    4.10    6.40
  -7  -8   1   29.40    7.50
   7  -8  -1   38.00    7.80
  -7  -8   1   39.60    9.10
  -7   8   1   23.50    7.90
  -6  -8   1   27.60    6.30
  -6  -8   1   12.60    6.40
   6  -8  -1   25.10    6.50
  -6   8   1   20.70    6.50
  -5  -8   1   19.70    5.50
   5  -8  -1   30.30    6.30
  -5  -8   1   33.00    7.30
  -5   8   1   21.30    5.90
  -5   8   1   18.90    5.90
   4  -8  -1    4.80    3.90
  -4  -8   1    4.70    4.40
  -4  -8   1    4.50    3.60
  -4   8   1    8.70    4.20
  -4   8   1    4.30    4.00
  -3  -8   1   68.79    7.40
   3  -8  -1   61.39    7.50
  -3  -8   1   49.10    7.50
  -3   8   1   65.59    7.50
  -3   8   1   51.79    6.80
   3   8  -1   61.99    7.70
   2  -8  -1  148.59   10.20
  -2  -8   1  143.09   10.20
  -2  -8   1  136.39    8.80
   2   8  -1  167.58   10.60
  -2   8   1  149.59   10.10
  -2   8   1  174.28    9.90
   1  -8  -1  172.48   10.10
  -1  -8   1  187.28   11.00
  -1  -8   1  177.78    8.90
   1   8  -1  195.68   10.90
  -1   8   1  170.18   10.50
   0  -8   1   -1.90    2.20
   0  -8   1    3.70    2.80
   0  -8  -1   -2.80    2.90
   0   8  -1   -0.10    2.90
   0   8   1   -1.00    3.30
  -1  -8  -1  179.38    8.80
   1  -8   1  178.18   10.30
  -1  -8  -1  182.98   10.50
   1   8   1  164.18   10.40
  -1   8  -1  170.38   10.50
   2  -8   1  146.99   10.20
  -2  -8  -1  150.88   10.50
  -2  -8  -1  139.39    8.40
  -2   8  -1  154.88    9.10
  -2   8  -1  169.48   10.60
   2   8   1  154.58   10.10
  -3  -8  -1   55.09    6.60
   3  -8   1   59.99    7.60
  -3  -8  -1   57.49    7.80
  -3   8  -1   52.49    6.80
  -3   8  -1   65.19    7.60
   3   8   1   50.19    6.80
  -4  -8  -1    8.50    3.90
   4  -8   1    9.60    4.50
  -4  -8  -1    7.60    4.70
  -4   8  -1    3.20    4.00
  -4   8  -1    2.80    4.30
  -5  -8  -1   22.00    5.70
   5  -8   1   19.30    5.70
  -5  -8  -1   27.00    6.60
  -5   8  -1    8.70    5.00
  -5   8  -1    6.00    4.80
   6  -8   1   20.20    6.00
  -6  -8  -1   26.40    7.10
  -6  -8  -1   18.80    6.20
  -6   8  -1   17.00    6.20
  -7  -8  -1   29.60    7.00
  -7  -8  -1   48.80    8.90
   7  -8   1   30.30    7.40
  -7   8  -1   32.00    8.20
   6  -9  -1    8.10    5.90
  -6  -9   1    8.20    6.20
  -6  -9   1    5.90    5.30
  -6   9   1   -1.10    5.70
   5  -9  -1    9.70    5.60
  -5  -9   1   12.50    5.30
  -5  -9   1   13.50    5.90
  -5   9   1    9.90    5.50
  -4  -9   1  114.19   10.30
   4  -9  -1  104.09   10.40
  -4  -9   1  110.89   11.70
  -4   9   1  101.59   10.00
  -4   9   1  106.09   10.40
   3  -9  -1   77.09    8.90
  -3  -9   1   80.59    9.70
  -3  -9   1   75.99    8.30
   3   9  -1   89.79    9.90
  -3   9   1   98.49    9.70
  -3   9   1   83.19    8.50
  -2  -9   1   29.50    5.60
  -2  -9   1   34.20    6.40
   2  -9  -1   22.90    5.60
  -2   9   1   31.00    6.20
   2   9  -1   28.20    6.10
   1  -9  -1   26.40    5.60
  -1  -9   1   19.40    5.20
  -1   9   1   18.10    5.40
   1   9  -1   26.20    6.00
   0  -9   1    2.70    3.70
   0  -9  -1    0.40    3.60
   0   9  -1    1.30    3.80
   0   9   1   -0.20    3.60
  -1  -9  -1   22.00    5.30
   1  -9   1   20.10    5.10
   1   9   1   22.10    5.40
  -1   9  -1   11.30    4.70
   2  -9   1   32.70    6.20
  -2  -9  -1   39.30    6.90
  -2   9  -1   30.00    6.10
   2   9   1   35.20    6.40
  -3  -9  -1   75.49    9.50
  -3  -9  -1   65.39    7.70
   3  -9   1   68.29    8.40
  -3   9  -1   94.89    9.10
   3   9   1   88.89    9.70
  -3   9  -1   80.79    9.20
  -4  -9  -1  132.99   10.10
  -4  -9  -1  101.09   11.30
   4  -9   1  126.19   11.50
  -4   9  -1  108.79   10.30
   5  -9   1    2.90    5.30
  -5  -9  -1    2.90    4.80
  -5  -9  -1    7.80    5.20
  -5   9  -1    6.80    5.60
  -6  -9  -1    4.30    4.90
   6  -9   1    9.20    5.60
  -6  -9  -1    1.80    5.80
  -6   9  -1    8.30    6.00
   5 -10  -1   10.30    6.00
  -5 -10   1   21.70    6.50
  -5 -10   1   18.00    7.30
  -5  10   1   19.00    6.90
  -4 -10   1   11.60    5.90
  -4 -10   1   -0.70    5.00
   4 -10  -1    1.10    4.80
  -4  10   1    7.10    5.60
   3 -10  -1    0.20    4.60
  -3 -10   1   -0.20    4.70
  -2 -10   1  179.08   13.10
   2 -10  -1  191.48   12.90
  -1 -10   1    4.40    4.80
   1 -10  -1   10.10    5.00
  -1  10   1   -1.00    4.40
   0 -10  -1   40.30    7.20
   0 -10   1   50.19    7.80
   0  10   1   48.00    7.90
  -1 -10  -1    2.50    4.40
   1 -10   1    9.80    5.00
   2 -10   1  181.78   13.00
  -2 -10  -1  169.48   12.80
  -3 -10  -1   -2.50    3.80
   3 -10   1    7.50    5.30
   4 -10   1   -2.40    4.80
  -4 -10  -1    2.30    5.90
  -5 -10  -1   20.60    7.70
   5 -10   1   27.90    7.50
  -5  10  -1   12.70    7.30
  -4 -11   1   26.40    7.90
   4 -11  -1   15.10    6.80
   3 -11  -1   10.50    6.20
  -3 -11   1    0.90    5.60
  -2 -11   1    4.10    5.50
   2 -11  -1   -1.60    4.90
  -1 -11   1   24.90    6.90
   1 -11  -1   31.60    7.40
   0 -11  -1    1.90    4.80
   0 -11   1    2.90    5.00
   1 -11   1   25.30    7.40
  -1 -11  -1   20.70    6.60
  -2 -11  -1   -2.60    4.50
   2 -11   1   -2.50    4.80
   3 -11   1    4.50    5.60
  -3 -11  -1    5.70    5.80
  -4 -11  -1   16.00    7.60
   4 -11   1   18.60    7.20
 -10   0   2   24.10    7.60
  -9   0   2  220.38   14.40
  -8   0   2   12.90    4.70
  -8   0   2   12.90    4.40
  -8   0   2   12.00    4.60
  -7   0   2  491.95   16.90
  -7   0   2  502.05   15.70
  -7   0   2  521.65   17.80
  -6   0   2  171.18    9.30
  -6   0   2  146.49    8.00
  -6   0   2  145.09    8.30
  -5   0   2  336.17   11.40
  -5   0   2  361.96   12.10
  -5   0   2  362.86   10.90
  -5   0   2  343.27    8.40
  -4   0   2   10.30    2.60
  -4   0   2   11.90    1.90
  -4   0   2    9.40    2.40
  -4   0   2   10.30    2.40
  -3   0   2   27.70    2.10
  -3   0   2   29.80    2.90
  -3   0   2   27.80    2.90
  -2   0   2   14.00    1.80
  -2   0   2   18.50    1.60
  -2   0   2   17.70    1.90
  -1   0   2  489.35    8.10
  -1   0   2  478.45    7.30
  -1   0  -2  466.85    7.50
   1   0   2  484.55    7.40
   1   0   2  478.65    7.40
  -1   0  -2  475.25    7.40
   1   0   2  478.35    7.60
  -2   0  -2   12.40    1.70
  -2   0  -2   14.80    1.80
   2   0   2   15.30    1.90
  -3   0  -2   26.30    2.70
  -3   0  -2   27.20    2.90
   3   0   2   28.10    2.90
  -4   0  -2    7.70    2.30
  -4   0  -2   11.10    1.40
   4   0   2   12.60    2.40
  -4   0  -2    7.30    2.30
  -5   0  -2  350.96   10.90
   5   0   2  336.67   11.20
  -5   0  -2  334.37   11.50
  -6   0  -2  132.79    8.50
  -6   0  -2  134.59    8.30
  -6   0  -2  132.59    7.70
   6   0   2  129.69    7.80
  -7   0  -2  504.35   15.70
  -7   0  -2  470.95   17.00
  -7   0  -2  493.65   17.00
  -8   0  -2   21.70    5.60
  -8   0  -2   21.10    5.20
  -8   0  -2   15.20    4.70
  -9   0  -2  194.88   13.80
 -10   0  -2    7.20    5.50
 -10  -1   2   16.50    6.20
 -10  -1   2   15.90    6.50
 -10   1   2   20.20    7.20
  -9  -1   2    3.00    4.60
  -9  -1   2    3.40    4.30
  -9   1   2    2.10    4.70
  -9   1   2   -0.30    4.20
  -8  -1   2   59.49    8.20
  -8  -1   2   79.89    8.90
  -8   1   2   59.49    7.70
  -8   1   2   68.39    8.30
  -8   1   2   62.69    7.50
  -7  -1   2   52.79    6.70
  -7  -1   2   67.39    7.90
  -7   1   2   59.89    6.90
  -7   1   2   62.59    6.80
  -6  -1   2   12.60    3.60
  -6  -1   2   12.40    3.10
  -6  -1   2    7.20    3.10
  -6   1   2    5.90    3.00
  -6   1   2    7.20    3.00
  -5  -1   2   16.80    3.40
  -5  -1   2   18.90    2.60
  -5  -1   2   16.40    2.80
  -5  -1   2   14.20    3.30
   5  -1  -2   11.30    2.80
  -5   1   2   16.90    3.30
  -5   1   2   21.50    2.60
  -5   1   2   12.10    3.10
  -4  -1   2   69.69    5.00
   4  -1  -2   77.09    4.70
  -4  -1   2   73.69    4.40
  -4  -1   2   72.19    5.20
  -4   1   2   70.19    3.70
  -4   1   2   71.39    5.20
  -4   1   2   72.49    5.00
  -3  -1   2    4.70    1.70
  -3  -1   2    5.30    1.60
   3  -1  -2    2.70    1.30
   3  -1  -2    5.90    1.70
  -3  -1   2    4.40    1.30
  -3   1   2    3.60    1.20
  -3   1   2    3.70    1.30
  -3   1   2    5.10    1.80
  -2  -1   2   44.90    3.00
  -2  -1   2   43.90    2.70
  -2  -1   2   40.10    2.10
   2  -1  -2   44.60    2.70
   2  -1  -2   47.10    2.40
  -2   1   2   38.50    2.20
  -2   1   2   43.70    2.60
  -2   1   2   34.50    2.70
  -1  -1   2   18.60    1.90
  -1  -1   2   18.10    1.60
   1  -1  -2   21.10    1.50
   1  -1  -2   18.90    1.40
  -1  -1   2   21.50    1.70
  -1   1   2   18.70    1.40
  -1   1   2   21.60    1.60
   1   1  -2   17.70    1.70
  -1   1   2   20.50    1.80
   0  -1   2    3.10    0.60
   0  -1   2    3.20    0.70
   0  -1  -2    3.80    0.60
   0  -1   2    6.10    0.80
   0   1   2    3.60    0.70
   0   1  -2    4.60    0.80
   0   1   2    3.40    0.50
  -1  -1  -2   18.00    1.70
   1  -1   2   19.60    1.90
   1  -1   2   18.40    1.70
   1  -1   2   20.80    1.50
  -1   1  -2   21.20    1.70
  -1   1  -2   26.00    1.80
  -2  -1  -2   40.20    2.30
   2  -1   2   45.70    3.00
  -2  -1  -2   49.80    3.00
   2  -1   2   43.50    2.60
  -2  -1  -2   44.00    2.80
   2   1   2   47.90    2.90
  -2   1  -2   39.70    2.70
  -2   1  -2   36.20    2.60
  -3  -1  -2    6.00    1.80
  -3  -1  -2    3.40    1.50
   3  -1   2    6.10    1.80
   3  -1   2    5.80    1.70
  -3  -1  -2    5.30    1.40
  -3   1  -2    2.40    1.40
   3   1   2    4.70    1.70
  -3   1  -2    2.80    1.40
  -3   1  -2    5.40    1.00
   4  -1   2   69.69    4.70
  -4  -1  -2   72.99    5.20
  -4  -1  -2   70.79    4.50
  -4  -1  -2   78.89    5.40
   4   1   2   72.49    5.10
  -4   1  -2   70.29    2.80
  -4   1  -2   62.19    4.60
  -4   1  -2   70.09    4.90
  -5  -1  -2   15.40    3.00
   5  -1   2   18.70    3.60
  -5  -1  -2   16.80    3.70
  -5  -1  -2   16.80    3.40
  -5   1  -2   13.40    2.90
  -5   1  -2   18.50    3.70
  -6  -1  -2    9.80    3.10
   6  -1   2    3.80    2.60
  -6  -1  -2    5.40    3.00
  -6  -1  -2    8.30    3.10
  -6   1  -2    9.10    3.20
  -6   1  -2    3.30    3.00
   7  -1   2   69.59    7.60
  -7  -1  -2   69.59    8.10
  -7  -1  -2   67.39    7.60
  -7  -1  -2   63.39    6.70
  -7   1  -2   59.89    7.00
  -7   1  -2   59.19    6.80
  -8  -1  -2   57.99    7.90
  -8  -1  -2   53.99    8.00
  -8   1  -2   57.89    8.30
  -8   1  -2   69.09    7.70
  -8   1  -2   71.19    8.50
  -9  -1  -2    4.40    4.40
  -9   1  -2    3.90    4.50
  -9   1  -2    5.60    4.80
 -10  -1  -2   24.10    7.30
 -10   1  -2   23.60    7.30
 -10  -2   2   12.70    5.90
 -10  -2   2   12.90    6.30
 -10   2   2   10.80    6.30
 -10   2   2   11.90    6.40
  -9  -2   2   53.29    8.30
  -9  -2   2   31.60    6.90
  -9   2   2   36.00    7.20
  -9   2   2   33.30    6.90
  -8  -2   2   41.50    7.00
  -8  -2   2   48.70    7.70
  -8  -2   2   56.79    7.70
  -8   2   2   51.89    7.30
  -8   2   2   52.09    7.60
  -7  -2   2  354.76   14.10
  -7  -2   2  349.87   14.80
  -7  -2   2  336.67   14.90
  -7   2   2  325.37   14.00
  -7   2   2  342.47   13.90
  -6  -2   2   86.39    6.60
   6  -2  -2   75.99    6.00
  -6  -2   2   68.89    7.10
  -6  -2   2   69.79    7.30
  -6   2   2   79.19    7.30
  -6   2   2   70.49    6.80
   5  -2  -2  407.06   11.50
  -5  -2   2  423.06   12.90
   5  -2  -2  425.86   13.00
  -5  -2   2  412.16   13.20
  -5  -2   2  407.76   13.50
  -5  -2   2  406.56   10.30
  -5   2   2  434.76   13.20
  -5   2   2  417.66   10.40
  -5   2   2  432.06   13.60
   4  -2  -2   88.69    4.90
  -4  -2   2   94.29    6.20
  -4  -2   2  110.69    6.20
  -4  -2   2   81.79    4.10
  -4  -2   2   86.39    5.50
   4  -2  -2   96.09    5.70
  -4   2   2   92.19    6.20
  -4   2   2   88.39    4.50
  -4   2   2   97.69    5.80
  -3  -2   2    9.90    1.40
   3  -2  -2    8.10    2.10
  -3  -2   2   11.20    2.30
   3  -2  -2    8.60    1.70
  -3   2   2    8.70    2.40
  -3   2   2   12.80    2.00
  -3   2   2    9.80    2.00
  -2  -2   2   84.49    4.10
  -2  -2   2   80.19    4.40
   2  -2  -2   92.49    4.10
   2  -2  -2   87.49    3.10
  -2   2   2   92.49    3.90
  -2   2   2   75.99    4.20
  -2   2   2   87.19    3.90
  -1  -2   2   13.70    1.80
  -1   2   2   17.20    1.90
  -1   2   2   18.10    1.80
   1   2  -2   16.20    2.00
  -1   2   2   16.30    2.00
   0  -2   2  913.01   13.50
   0  -2  -2  951.80   14.50
   0  -2  -2  940.41   13.80
   0  -2   2  948.51   14.50
   0   2  -2  904.71   12.40
   0   2   2  928.31   13.40
   0   2  -2  939.41   14.40
   1  -2   2   20.40    2.20
  -1  -2  -2   14.70    2.00
   1  -2   2   21.20    1.90
  -1   2  -2   22.00    2.20
   1   2   2   16.60    1.80
  -1   2  -2   18.00    2.00
   2  -2   2   87.29    3.70
   2  -2   2   83.09    4.20
  -2  -2  -2   86.49    2.80
  -2  -2  -2   96.69    4.60
  -2   2  -2   87.19    4.20
  -2   2  -2   78.79    4.10
   3  -2   2    8.60    2.40
  -3  -2  -2   12.10    1.70
   3  -2   2   13.30    2.20
  -3  -2  -2   13.10    2.40
  -3  -2  -2    9.80    2.30
  -3   2  -2    7.60    1.90
  -3   2  -2   11.20    2.20
  -4  -2  -2   87.69    4.50
  -4  -2  -2   93.89    5.70
   4  -2   2   90.99    5.10
  -4  -2  -2   94.89    6.30
   4  -2   2   92.59    5.70
  -4   2  -2   92.99    6.00
  -4   2  -2   85.39    5.60
  -5  -2  -2  401.96   13.50
   5  -2   2  415.16   12.10
  -5  -2  -2  425.56   13.40
  -5  -2  -2  405.56   10.50
   5  -2   2  427.16   13.40
  -5   2  -2  414.76   13.10
  -5   2  -2  409.16   13.10
   6  -2   2   78.29    6.30
  -6  -2  -2   78.79    7.40
  -6  -2  -2   91.59    8.60
  -6   2  -2   78.79    7.40
  -6   2  -2   79.09    7.40
  -7  -2  -2  312.37   14.20
   7  -2   2  310.37   12.60
  -7  -2  -2  314.17   14.30
  -7   2  -2  320.67   14.10
  -7   2  -2  348.47   14.40
  -8  -2  -2   34.10    6.90
  -8  -2  -2   38.50    6.60
   8  -2   2   41.50    6.90
  -8   2  -2   39.00    6.60
  -8   2  -2   52.09    7.50
  -9  -2  -2   51.09    8.50
  -9   2  -2   42.60    7.70
 -10  -2  -2   13.50    6.50
 -10  -2  -2    7.30    5.50
 -10   2  -2    8.00    5.80
 -10   2  -2    6.70    6.30
 -10  -3   2   19.80    7.40
 -10  -3   2   11.70    6.30
 -10   3   2    9.10    6.20
 -10   3   2   18.30    7.20
  -9  -3   2   12.00    5.90
  -9  -3   2    5.40    4.50
  -9   3   2   15.40    6.00
  -8  -3   2   15.80    5.00
  -8  -3   2   20.70    5.90
  -8   3   2   17.30    5.20
  -8   3   2   33.70    6.50
  -7  -3   2   21.40    5.00
   7  -3  -2   34.10    5.80
  -7  -3   2   28.60    5.80
  -7  -3   2   35.50    6.00
  -7   3   2   36.70    5.90
  -7   3   2   23.80    5.20
  -6  -3   2   38.80    5.90
  -6  -3   2   33.40    5.30
   6  -3  -2   42.80    5.00
  -6  -3   2   39.50    5.60
   6  -3  -2   33.50    5.30
  -6   3   2   33.00    5.30
  -6   3   2   45.60    5.90
   5  -3  -2  267.17    9.40
  -5  -3   2  265.97   11.60
   5  -3  -2  269.37   10.70
  -5  -3   2  266.07   10.80
  -5  -3   2  267.17   11.00
  -5   3   2  250.67   10.70
  -5   3   2  256.17   10.40
  -5   3   2  247.98    8.40
   4  -3  -2 1023.50   17.80
   4  -3  -2 1003.30   20.30
  -4  -3   2  994.40   21.50
  -4  -3   2  991.20   20.60
  -4   3   2 1034.80   21.60
  -4   3   2 1000.50   20.10
  -4   3   2 1001.40   18.10
   3  -3  -2  156.78    6.60
  -3  -3   2  148.89    7.20
  -3  -3   2  144.69    6.60
   3  -3  -2  160.48    5.50
  -3   3   2  173.88    7.70
  -3   3   2  182.68    7.10
  -3   3   2  145.39    6.00
  -2  -3   2   78.89    4.40
   2  -3  -2   90.49    3.50
   2  -3  -2  102.69    4.90
  -2  -3   2   88.49    5.30
  -2   3   2   85.29    4.40
  -2   3   2   82.79    4.80
  -2   3   2   83.29    4.50
   2   3  -2   80.29    4.80
   1  -3  -2  295.17    7.80
  -1  -3   2  356.06    9.20
   1  -3  -2  296.87    6.00
  -1   3   2  284.77    7.50
  -1   3   2  306.87    8.00
   0  -3  -2   41.00    3.00
   0  -3   2   48.00    2.90
   0  -3  -2   45.10    2.40
   0  -3   2   44.90    3.20
   0   3   2   50.09    3.00
   0   3   2   37.90    2.50
   0   3  -2   49.70    3.40
   0   3  -2   42.60    2.40
  -1  -3  -2  280.67    8.10
   1  -3   2  323.57    8.40
  -1  -3  -2  273.07    6.90
   1  -3   2  284.17    6.90
  -1   3  -2  330.47    7.80
   1   3   2  285.27    7.80
  -1   3  -2  291.97    8.10
  -2  -3  -2   64.09    3.90
   2  -3   2   73.09    4.40
   2  -3   2   67.79    3.70
  -2  -3  -2   65.99    4.40
  -2   3  -2   71.19    4.30
  -2   3  -2   77.49    4.40
   3  -3   2  124.29    5.50
   3  -3   2  143.39    6.70
  -3  -3  -2  132.89    3.90
  -3  -3  -2  141.89    7.00
  -3  -3  -2  135.89    6.10
  -3   3  -2  144.59    6.70
  -3   3  -2  133.09    6.40
   4  -3   2 1005.50   20.90
   4  -3   2 1027.10   18.90
  -4  -3  -2 1012.60   15.40
  -4  -3  -2 1045.20   20.80
  -4  -3  -2 1063.49   22.30
  -4   3  -2 1010.90   21.00
  -4   3  -2 1021.20   20.90
  -5  -3  -2  256.87   11.30
  -5  -3  -2  246.78   10.60
   5  -3   2  274.37    9.70
   5  -3   2  267.57   10.80
  -5   3  -2  258.07   10.70
  -5   3  -2  267.57   10.70
   6  -3   2   38.60    5.70
  -6  -3  -2   38.80    6.00
  -6  -3  -2   37.30    5.40
   6  -3   2   49.10    5.70
  -6   3  -2   34.70    5.50
  -6   3  -2   25.20    4.50
  -7  -3  -2   31.00    5.50
  -7  -3  -2   27.90    5.80
   7  -3   2   24.70    5.10
  -7  -3  -2   31.60    5.70
  -7   3  -2   36.70    6.20
  -7   3  -2   30.40    5.70
  -8  -3  -2   24.40    5.90
   8  -3   2   19.20    5.40
  -8  -3  -2   14.00    5.80
  -8   3  -2   28.50    6.50
  -9  -3  -2    6.40    5.60
  -9  -3  -2    0.10    4.30
   9  -3   2    9.20    5.50
  -9   3  -2    3.60    5.10
 -10  -3  -2    3.00    6.50
 -10  -3  -2    5.80    6.10
 -10   3  -2   11.50    6.70
  -9  -4   2   -2.50    4.90
  -9  -4   2    5.30    4.80
  -9   4   2    1.80    5.40
  -8  -4   2   25.40    6.40
  -8  -4   2   19.70    5.70
  -8   4   2   26.70    6.30
  -7  -4   2    9.20    4.10
  -7  -4   2   18.20    4.70
  -7  -4   2    9.40    4.20
   7  -4  -2   13.70    4.70
  -7   4   2    1.50    4.00
  -7   4   2   11.10    4.50
  -6  -4   2   15.70    4.50
  -6  -4   2   19.30    4.40
  -6  -4   2   22.00    4.80
   6  -4  -2   22.10    4.30
   6  -4  -2   11.60    4.10
  -6   4   2   20.40    4.60
  -6   4   2   25.50    5.00
   5  -4  -2    5.20    3.10
   5  -4  -2    4.10    2.60
  -5  -4   2    3.70    3.10
  -5  -4   2    7.20    3.10
  -5   4   2    9.50    3.00
  -5   4   2   10.70    3.60
  -4  -4   2   31.70    4.70
  -4  -4   2   32.90    4.50
   4  -4  -2   30.80    4.30
   4  -4  -2   30.70    3.60
  -4   4   2   26.70    4.30
  -4   4   2   31.60    4.10
   3  -4  -2   13.50    2.90
  -3  -4   2    9.40    2.60
   3  -4  -2    9.60    1.90
  -3  -4   2    8.90    3.00
  -3   4   2   12.60    2.60
  -3   4   2   12.50    2.90
   2  -4  -2  180.88    7.20
   2  -4  -2  183.58    5.50
  -2  -4   2  202.98    8.50
  -2  -4   2  188.78    7.50
  -2   4   2  210.08    7.60
   2   4  -2  205.78    8.30
  -2   4   2  191.78    7.90
  -1  -4   2    9.10    2.50
   1  -4  -2    6.10    1.50
   1  -4  -2    5.70    2.10
  -1  -4   2    9.90    2.20
   1   4  -2    8.40    1.30
   1   4  -2    7.80    2.20
  -1   4   2    8.90    2.20
  -1   4   2    4.10    1.80
   0  -4  -2   16.70    2.70
   0  -4  -2   16.50    2.10
   0   4   2   14.50    2.50
   0   4  -2   12.00    2.10
   0   4   2   12.40    2.10
  -1  -4  -2   11.80    2.50
  -1  -4  -2    8.50    1.80
   1  -4   2    6.20    1.70
   1  -4   2    4.90    2.10
  -1   4  -2    9.80    2.10
   1   4   2    7.70    2.00
  -1   4  -2    6.40    1.90
   1   4   2    8.30    1.50
  -2  -4  -2  196.28    7.20
  -2  -4  -2  191.78    8.30
   2  -4   2  196.78    7.70
   2  -4   2  198.08    6.60
  -2   4  -2  191.18    7.50
  -2   4  -2  199.68    7.70
   2   4   2  188.18    7.70
   3  -4   2    9.30    2.30
  -3  -4  -2    8.70    2.80
   3  -4   2    9.60    2.80
  -3  -4  -2   11.20    2.80
  -3   4  -2   13.90    3.10
  -3   4  -2    6.60    2.40
   4  -4   2   30.30    3.70
  -4  -4  -2   29.10    4.60
   4  -4   2   30.00    4.40
  -4  -4  -2   26.20    4.10
  -4   4  -2   22.40    4.10
  -4   4  -2   21.70    3.90
  -5  -4  -2    9.80    3.10
   5  -4   2    8.30    3.00
  -5  -4  -2    9.00    3.30
  -5  -4  -2    6.30    3.30
   5  -4   2    3.90    2.70
  -5   4  -2    8.80    3.00
  -5   4  -2    4.60    2.90
   6  -4   2   26.70    5.10
  -6  -4  -2   17.80    4.30
   6  -4   2   17.90    4.10
  -6  -4  -2   14.00    4.00
  -6  -4  -2   23.10    4.90
  -6   4  -2   16.00    4.10
  -6   4  -2   15.50    4.60
  -7  -4  -2   17.70    4.90
  -7  -4  -2   12.80    4.70
  -7  -4  -2    5.60    4.00
   7  -4   2   13.50    4.90
   7  -4   2   19.90    4.70
  -7   4  -2   11.60    4.70
  -7   4  -2   13.90    4.30
  -8  -4  -2   18.70    5.60
  -8  -4  -2   14.40    6.00
   8  -4   2   10.50    4.60
  -8   4  -2   16.40    5.40
  -9  -4  -2    8.40    5.50
   9  -4   2   11.10    6.10
  -9  -4  -2    9.00    6.10
  -9   4  -2    7.10    5.70
  -9  -5   2   45.50    9.10
  -9  -5   2   44.70    8.50
  -9   5   2   32.00    8.10
  -8  -5   2   14.00    5.20
  -8  -5   2    8.00    5.50
   8  -5  -2    2.20    4.80
  -8   5   2   -3.10    4.50
  -7  -5   2    2.30    3.80
   7  -5  -2    3.20    4.40
  -7  -5   2    8.70    5.20
  -7   5   2    3.50    3.90
  -7   5   2    6.60    4.30
  -6  -5   2   47.10    7.20
  -6  -5   2   24.30    5.10
   6  -5  -2   33.10    5.80
  -6   5   2   29.60    5.90
  -6   5   2   31.70    5.60
   5  -5  -2   33.80    5.50
  -5  -5   2   38.90    5.70
  -5  -5   2   40.10    6.40
  -5   5   2   37.20    5.30
  -5   5   2   34.60    5.70
  -4  -5   2   15.00    3.90
   4  -5  -2   30.20    4.50
   4  -5  -2   19.80    3.10
  -4  -5   2   17.80    3.80
  -4   5   2   20.40    4.10
  -4   5   2   17.30    3.70
   3  -5  -2    8.20    2.20
  -3  -5   2    7.50    3.00
  -3  -5   2    8.60    2.90
   3  -5  -2    9.80    3.00
  -3   5   2   10.60    3.10
  -3   5   2   10.90    2.80
  -2  -5   2   45.40    4.80
   2  -5  -2   37.40    4.30
   2  -5  -2   40.30    3.40
  -2  -5   2   38.50    5.10
  -2   5   2   38.70    4.30
   2   5  -2   32.10    4.30
  -2   5   2   33.50    4.20
  -1  -5   2  827.72   18.50
  -1  -5   2  817.52   16.60
   1  -5  -2  784.02   13.60
   1  -5  -2  776.02   17.00
   1   5  -2  821.92   12.80
  -1   5   2  874.31   17.20
   1   5  -2  842.82   18.60
  -1   5   2  850.41   17.70
   0  -5  -2   24.40    2.80
   0  -5  -2   25.00    3.60
   0  -5   2   28.30    3.30
   0  -5   2   24.90    3.70
   0   5  -2   31.00    3.00
   0   5  -2   23.60    3.50
   0   5   2   18.70    3.10
   0   5   2   23.50    2.90
   1  -5   2  777.92   15.00
  -1  -5  -2  824.22   15.70
   1  -5   2  803.52   17.70
  -1  -5  -2  807.32   18.00
   1   5   2  825.02   13.80
  -1   5  -2  816.42   17.90
   1   5   2  803.92   17.40
  -1   5  -2  811.22   15.90
   2  -5   2   39.50    4.00
  -2  -5  -2   43.10    4.40
  -2  -5  -2   39.90    4.90
   2  -5   2   39.00    4.70
   2   5   2   36.00    4.20
  -2   5  -2   39.50    4.60
  -2   5  -2   32.80    4.20
  -3  -5  -2   11.70    3.20
   3  -5   2    8.40    2.90
   3  -5   2   12.00    2.70
  -3  -5  -2    7.70    2.50
  -3   5  -2    5.80    2.90
  -3   5  -2   13.00    3.30
  -4  -5  -2   12.70    3.90
  -4  -5  -2   14.80    3.40
   4  -5   2   14.80    3.70
   4  -5   2   19.40    3.50
  -4   5  -2   17.80    3.90
  -4   5  -2   13.10    3.30
   5  -5   2   42.90    5.00
  -5  -5  -2   32.90    5.10
   5  -5   2   43.60    6.00
  -5  -5  -2   35.60    6.00
  -5   5  -2   45.50    6.00
  -5   5  -2   45.90    6.30
  -6  -5  -2   30.30    6.30
  -6  -5  -2   33.90    5.90
   6  -5   2   24.80    4.80
   6  -5   2   29.20    5.90
  -6  -5  -2   40.20    6.40
  -6   5  -2   39.90    6.50
  -6   5  -2   38.50    6.30
   7  -5   2    9.00    4.40
   7  -5   2    2.20    3.60
  -7  -5  -2    9.30    4.90
  -7  -5  -2   12.30    4.50
  -7  -5  -2    4.20    4.30
  -7   5  -2    3.00    4.40
  -7   5  -2    5.00    4.40
  -8  -5  -2    5.60    4.80
   8  -5   2    5.00    5.10
  -8  -5  -2    2.70    5.20
  -8   5  -2    5.10    5.20
  -9  -5  -2   34.70    7.40
  -9  -5  -2   24.60    8.00
  -9   5  -2   27.30    7.80
  -9  -6   2    4.10    6.10
  -9  -6   2    0.50    6.80
  -9   6   2    0.40    6.20
   8  -6  -2   14.30    6.20
  -8  -6   2   10.50    6.30
  -8  -6   2   20.70    6.30
  -8   6   2   16.50    6.30
  -7  -6   2   18.20    5.80
   7  -6  -2   34.90    6.90
  -7  -6   2   10.20    5.10
  -7   6   2   11.80    5.10
  -7   6   2   23.80    6.70
   6  -6  -2   57.09    7.50
  -6  -6   2   39.00    6.60
  -6  -6   2   50.89    8.10
  -6   6   2   50.79    7.00
  -6   6   2   49.40    7.40
  -5  -6   2  308.67   13.70
  -5  -6   2  316.87   14.90
   5  -6  -2  312.47   13.60
  -5   6   2  326.07   14.40
  -5   6   2  318.27   13.50
   4  -6  -2   65.09    6.90
  -4  -6   2   43.60    5.80
  -4  -6   2   52.89    7.10
  -4   6   2   57.49    6.30
  -4   6   2   56.69    6.70
   3  -6  -2   64.89    6.50
  -3  -6   2   76.59    6.90
  -3  -6   2   62.79    7.00
   3   6  -2   70.79    7.00
  -3   6   2   75.29    7.00
  -3   6   2   77.89    6.60
  -2  -6   2   35.60    5.20
  -2  -6   2   31.60    4.40
   2  -6  -2   23.00    3.80
   2  -6  -2   22.50    3.10
   2   6  -2   16.70    3.70
  -2   6   2   21.20    3.70
  -2   6   2   26.60    4.00
  -1  -6   2   22.10    3.50
  -1  -6   2   22.60    4.00
   1  -6  -2   18.70    2.80
   1  -6  -2   16.40    3.30
   1   6  -2   13.30    3.50
  -1   6   2   16.40    3.40
  -1   6   2   16.40    3.20
   0  -6  -2  179.88    6.80
   0  -6  -2  178.98    8.70
   0  -6   2  206.88    7.90
   0  -6   2  189.98    8.90
   0   6   2  190.18    7.30
   0   6  -2  199.48    7.10
   0   6  -2  200.78    9.50
   0   6   2  189.28    8.70
  -1  -6  -2   16.00    3.50
  -1  -6  -2   18.70    3.10
   1  -6   2   27.00    4.40
   1  -6   2   22.40    3.10
  -1   6  -2   18.00    3.30
  -1   6  -2   18.10    3.70
   1   6   2   16.60    3.60
  -2  -6  -2   19.10    3.50
   2  -6   2   25.60    4.10
  -2  -6  -2   23.00    4.40
   2  -6   2   22.00    3.50
   2   6   2   26.60    4.20
  -2   6  -2   20.50    3.70
  -2   6  -2   23.40    4.10
   3  -6   2   62.09    5.50
   3  -6   2   72.89    6.90
  -3  -6  -2   92.79    8.50
  -3  -6  -2   73.99    6.60
  -3   6  -2   72.19    6.60
  -3   6  -2   65.19    6.50
   4  -6   2   55.39    5.50
  -4  -6  -2   46.70    5.80
   4  -6   2   54.99    6.40
  -4  -6  -2   47.70    6.60
  -4   6  -2   52.79    6.20
  -4   6  -2   55.59    6.40
  -5  -6  -2  310.77   15.00
   5  -6   2  302.97   11.30
   5  -6   2  298.47   13.30
  -5  -6  -2  301.97   13.20
  -5   6  -2  296.17   13.40
  -5   6  -2  323.17   14.30
   6  -6   2   44.60    7.00
  -6  -6  -2   39.70    6.50
  -6  -6  -2   38.00    7.50
  -6   6  -2   38.20    6.80
  -6   6  -2   45.60    7.00
   7  -6   2   27.50    6.00
  -7  -6  -2   23.30    6.10
  -7  -6  -2   24.90    6.70
  -7   6  -2   19.60    6.70
   8  -6   2   14.10    6.10
  -8  -6  -2   10.40    5.60
  -8  -6  -2   24.50    7.10
  -8   6  -2    9.10    6.00
   9  -6   2    0.60    5.40
  -9  -6  -2   -0.20    7.00
  -9  -6  -2    6.60    5.60
  -9   6  -2    4.80    6.80
  -8  -7   2   46.70    9.80
  -8  -7   2   54.89    9.40
   8  -7  -2   34.30    7.90
  -8   7   2   54.79    9.30
   7  -7  -2    0.30    4.60
  -7  -7   2    5.60    4.80
  -7  -7   2    0.20    4.40
  -7   7   2    3.10    5.30
  -6  -7   2   81.99    9.90
   6  -7  -2   74.09    9.30
  -6  -7   2   72.69    9.00
  -6   7   2   69.89    8.40
  -6   7   2   59.99    8.50
  -5  -7   2   -1.10    3.90
   5  -7  -2    3.30    3.90
  -5  -7   2    3.40    3.60
  -5   7   2   -2.70    3.30
  -5   7   2    2.50    4.20
   4  -7  -2  369.96   14.80
  -4  -7   2  351.66   14.20
  -4  -7   2  377.66   16.20
  -4   7   2  380.46   14.80
  -4   7   2  341.37   14.50
  -3  -7   2    0.80    2.20
  -3  -7   2    0.50    3.20
   3  -7  -2   -1.00    2.70
   3   7  -2    0.30    2.70
  -3   7   2    1.30    2.90
  -3   7   2    4.90    3.10
   2  -7  -2   26.80    4.70
  -2  -7   2   18.30    3.90
  -2  -7   2   30.10    5.20
  -2   7   2   23.80    4.30
  -2   7   2   13.30    3.80
   2   7  -2   25.50    4.90
  -1  -7   2   -1.40    1.90
  -1  -7   2    3.80    2.70
   1  -7  -2    1.10    2.30
  -1   7   2    0.30    2.60
   1   7  -2    0.80    2.30
  -1   7   2    2.30    2.80
   0  -7   2    2.40    2.30
   0  -7   2    0.70    2.60
   0  -7  -2    2.80    2.10
   0  -7  -2    2.90    2.30
   0   7  -2    1.00    2.30
   0   7   2    3.50    2.90
   1  -7   2   -1.30    2.40
   1  -7   2    4.10    2.40
  -1  -7  -2    3.70    2.70
  -1  -7  -2    2.30    2.30
   1   7   2   -0.90    2.60
  -1   7  -2    0.30    2.70
  -1   7  -2    2.40    2.50
   2  -7   2   27.10    4.10
  -2  -7  -2   27.10    5.10
  -2  -7  -2   26.30    4.30
   2  -7   2   24.30    4.70
  -2   7  -2   22.90    4.40
   2   7   2   21.20    4.60
  -2   7  -2   30.50    5.10
   3  -7   2   -2.70    2.40
  -3  -7  -2    1.80    2.40
  -3  -7  -2   -4.10    3.00
   3  -7   2    5.00    3.10
  -3   7  -2    3.40    3.00
  -3   7  -2    0.70    2.90
   3   7   2    1.80    3.30
  -4  -7  -2  364.16   14.20
   4  -7   2  395.56   15.50
  -4  -7  -2  362.26   16.20
  -4   7  -2  370.46   15.10
  -4   7  -2  389.46   15.20
  -5  -7  -2   -1.30    4.00
   5  -7   2    0.80    3.70
  -5  -7  -2    5.30    3.60
  -5   7  -2   -4.00    3.30
  -5   7  -2   -0.80    3.80
  -6  -7  -2   68.39    9.50
   6  -7   2   63.99    8.90
  -6  -7  -2   74.59    8.90
  -6   7  -2   68.99    9.10
  -7  -7  -2    2.60    3.90
   7  -7   2   -7.60    4.30
  -7  -7  -2   -2.40    4.80
  -7   7  -2   -2.60    5.00
  -8  -7  -2   32.00    8.30
   8  -7   2   36.20    8.10
  -8  -7  -2   37.00    7.80
  -8   7  -2   49.50    9.50
   7  -8  -2   20.10    6.60
  -7  -8   2   12.80    6.60
  -7  -8   2   16.20    6.50
  -7   8   2   41.10    8.80
  -6  -8   2   28.90    6.50
   6  -8  -2   25.30    6.70
  -6  -8   2   18.60    6.80
  -6   8   2   20.40    6.60
   5  -8  -2  101.49   10.00
  -5  -8   2   93.39   11.10
  -5  -8   2  106.69   10.20
  -5   8   2  105.69   10.00
  -5   8   2  103.69   10.30
   4  -8  -2   63.79    7.90
  -4  -8   2   77.99    8.20
  -4  -8   2   89.79   10.00
  -4   8   2   84.69    8.80
  -4   8   2   69.49    8.10
  -3  -8   2   -0.10    3.30
  -3  -8   2    3.30    3.20
   3  -8  -2   16.60    4.40
   3   8  -2    1.20    3.40
  -3   8   2    3.20    3.40
  -3   8   2    1.30    3.40
   2  -8  -2  335.47   14.20
  -2  -8   2  340.17   12.90
  -2  -8   2  349.77   15.40
  -2   8   2  358.66   13.80
   2   8  -2  398.46   15.90
  -2   8   2  387.66   15.10
  -1  -8   2  193.48   11.40
  -1  -8   2  207.58    9.70
   1  -8  -2  221.88   11.30
   1   8  -2  213.08   11.80
  -1   8   2  213.98   11.50
   0  -8  -2  127.89    9.00
   0  -8   2  125.49    7.40
   0  -8   2  127.59    9.10
   0   8   2  126.49    9.10
   0   8  -2  139.99    9.50
   1  -8   2  215.38    9.40
  -1  -8  -2  213.18   11.60
   1  -8   2  224.48   11.70
  -1   8  -2  195.18   11.30
   1   8   2  191.88   10.60
  -2  -8  -2  342.37   15.00
   2  -8   2  344.97   14.80
  -2  -8  -2  358.96   12.70
  -2   8  -2  356.86   13.20
  -2   8  -2  364.36   15.00
   2   8   2  352.96   14.80
  -3  -8  -2   -1.80    3.50
   3  -8   2    1.80    3.70
  -3  -8  -2    8.60    4.70
   3   8   2    5.60    4.10
  -3   8  -2    5.50    3.60
  -3   8  -2    2.30    3.90
   4  -8   2   87.49    9.40
  -4  -8  -2   71.79    9.30
  -4  -8  -2   88.39    8.60
  -4   8  -2   84.79    9.00
  -4   8  -2   97.29    9.40
  -5  -8  -2  113.79   12.00
  -5  -8  -2  108.19   10.40
   5  -8   2  116.29   11.00
  -5   8  -2  115.39   11.10
  -5   8  -2   88.69   11.50
   6  -8   2    4.00    5.40
  -6  -8  -2   14.30    6.50
  -6  -8  -2   15.20    5.50
  -6   8  -2   15.90    6.20
  -7  -8  -2   34.30    8.10
   7  -8   2   25.40    7.10
  -7  -8  -2   37.80    8.00
  -7   8  -2   26.60    7.60
  -6  -9   2    5.10    5.40
  -6  -9   2    2.00    5.00
   6  -9  -2    2.70    5.40
  -6   9   2   -3.20    5.70
  -5  -9   2   23.60    6.30
  -5  -9   2   13.40    5.60
   5  -9  -2   24.80    6.70
  -5   9   2   23.30    6.30
   4  -9  -2   14.50    5.20
  -4  -9   2   10.70    5.40
  -4  -9   2    3.50    3.90
  -4   9   2   -4.90    3.90
  -4   9   2    8.70    4.70
   3  -9  -2   55.69    7.40
  -3  -9   2   52.59    7.20
  -3  -9   2   34.10    6.90
  -3   9   2   42.00    7.00
  -3   9   2   52.69    7.20
  -2  -9   2   55.69    6.60
   2  -9  -2   47.90    7.30
  -2  -9   2   56.29    7.90
  -2   9   2   46.60    7.30
   2   9  -2   63.99    8.20
  -1  -9   2   50.09    6.30
  -1  -9   2   51.89    7.40
   1  -9  -2   47.00    6.90
  -1   9   2   40.50    6.70
   1   9  -2   59.59    8.00
   0  -9  -2    5.90    4.10
   0  -9   2   10.90    4.50
   0   9   2   10.50    4.50
   0   9  -2    7.50    4.50
  -1  -9  -2   53.39    7.20
   1  -9   2   58.19    7.60
  -1   9  -2   64.19    8.10
   1   9   2   55.39    7.60
  -2  -9  -2   51.89    7.70
   2  -9   2   50.29    7.10
  -2   9  -2   55.09    7.80
   2   9   2   67.89    8.40
   3  -9   2   42.00    6.50
  -3  -9  -2   39.40    7.30
   3   9   2   43.10    7.30
  -3   9  -2   47.50    6.90
  -3   9  -2   54.79    7.90
  -4  -9  -2   -3.50    4.60
   4  -9   2    8.80    5.00
  -4  -9  -2    3.10    3.90
  -4   9  -2    4.10    5.30
   5  -9   2   26.10    6.80
  -5  -9  -2   33.30    7.90
  -5  -9  -2   29.80    6.50
  -5   9  -2   16.00    6.50
   6  -9   2    1.60    4.80
  -6  -9  -2    0.40    4.90
  -6  -9  -2    0.50    5.80
  -6   9  -2    0.30    5.90
  -5 -10   2   16.80    6.90
  -5 -10   2    5.90    5.50
   5 -10  -2   20.30    7.00
  -5  10   2   10.10    6.10
  -4 -10   2    4.10    4.70
  -4 -10   2    1.50    4.80
   4 -10  -2    3.60    4.90
  -4  10   2    3.70    5.30
   3 -10  -2   40.00    7.70
  -3 -10   2   34.60    7.30
   2 -10  -2    0.00    4.20
  -2 -10   2    6.50    5.00
  -2  10   2   -4.70    5.60
   1 -10  -2  118.99   11.00
  -1 -10   2  132.19   11.80
  -1  10   2  144.79   12.00
   0 -10  -2  206.88   13.10
   0 -10   2  207.08   13.40
   0  10   2  214.38   13.30
  -1 -10  -2  133.99   11.00
   1 -10   2  136.99   11.60
   1  10   2  151.58   14.80
  -2 -10  -2   -1.30    4.40
   2 -10   2   11.40    5.10
  -3 -10  -2   44.00    8.10
   3 -10   2   30.00    6.80
   4 -10   2    2.80    5.10
  -4 -10  -2    3.30    5.90
   5 -10   2    8.00    5.50
  -5 -10  -2   11.10    6.40
  -5  10  -2    5.60    5.80
   4 -11  -2    2.60    5.80
  -4 -11   2    2.20    5.80
  -3 -11   2    5.70    5.80
   3 -11  -2    6.80    5.50
   2 -11  -2    3.40    5.10
  -2 -11   2    0.50    5.00
   1 -11  -2   -4.90    4.60
  -1 -11   2   -2.10    4.90
   0 -11   2   15.30    6.10
   0 -11  -2    2.90    4.90
  -1 -11  -2    6.80    5.20
   1 -11   2    1.00    4.50
   2 -11   2    0.40    4.90
  -2 -11  -2    0.40    5.00
  -3 -11  -2    7.70    5.60
   3 -11   2    3.50    5.30
   4 -11   2   -3.90    5.20
  -4 -11  -2   10.30    7.00
 -10   0   3   -2.00    5.00
 -10   0   3   -3.30    4.60
  -9   0   3    4.60    4.70
  -8   0   3    8.30    4.70
  -8   0   3    6.30    4.20
  -7   0   3    1.00    2.60
  -7   0   3    0.80    2.90
  -7   0   3    3.00    3.00
  -6   0   3   21.80    4.40
  -6   0   3   27.80    4.40
  -6   0   3   31.10    4.90
  -5   0   3   33.00    3.20
  -5   0   3   34.60    4.40
  -5   0   3   33.30    4.10
  -5   0   3   38.30    4.80
  -4   0   3    6.00    2.30
  -4   0   3    6.10    2.20
  -4   0   3    8.20    1.80
  -4   0   3    7.60    2.40
  -3   0   3   60.29    3.80
  -3   0   3   60.49    3.60
  -3   0   3   61.39    3.10
  -3   0   3   62.29    3.90
  -2   0   3   21.60    2.10
  -2   0   3   18.80    2.10
  -2   0   3   18.60    1.90
  -2   0   3   20.30    1.80
  -1   0   3    1.30    0.60
  -1   0   3    0.90    0.50
   0   0   3    0.40    0.20
   0   0  -3    0.10    0.20
  -1   0  -3    1.20    0.60
  -1   0  -3    1.40    0.90
   1   0   3    1.50    0.70
   1   0   3    2.40    0.70
   1   0   3    2.70    0.70
  -2   0  -3   22.30    2.20
  -2   0  -3   22.10    2.20
   2   0   3   20.20    2.00
  -3   0  -3   45.60    3.30
  -3   0  -3   66.29    3.90
   3   0   3   57.09    3.80
  -4   0  -3    7.30    2.30
  -4   0  -3    6.80    2.20
   4   0   3    7.10    2.50
  -5   0  -3   24.70    3.50
   5   0   3   32.90    4.40
  -5   0  -3   25.50    3.80
  -6   0  -3   22.80    4.70
  -6   0  -3   26.80    4.60
  -6   0  -3   30.20    4.60
   6   0   3   33.70    4.90
  -7   0  -3    4.70    3.30
  -7   0  -3    2.00    3.10
   7   0   3    2.30    3.50
  -7   0  -3    5.20    3.30
  -8   0  -3    9.50    4.20
  -8   0  -3   15.40    5.00
  -8   0  -3   17.40    5.00
  -9   0  -3    5.20    5.00
 -10   0  -3   -8.10    4.40
 -10  -1   3    0.90    5.30
 -10  -1   3   13.30    6.40
 -10   1   3   13.30    6.70
  -9  -1   3   91.49   10.70
  -9  -1   3   91.89   10.30
  -9   1   3   71.79    9.80
  -9   1   3   87.79    9.80
  -8  -1   3   20.50    5.90
  -8  -1   3   19.80    5.30
  -8  -1   3   18.50    5.30
  -8   1   3   20.50    5.10
  -8   1   3   30.20    6.10
  -8   1   3   21.00    5.50
  -7  -1   3   81.79    8.40
  -7  -1   3   70.39    7.70
  -7   1   3   69.89    7.70
  -7   1   3   86.09    8.20
  -7   1   3   81.39    7.70
  -6  -1   3   28.80    4.60
  -6  -1   3   35.80    5.10
  -6  -1   3   33.20    4.30
  -6   1   3   37.90    5.10
  -6   1   3   19.70    4.10
  -5  -1   3   56.79    4.50
  -5  -1   3   51.49    5.70
  -5  -1   3   53.59    5.50
  -5  -1   3   49.30    3.70
  -5   1   3   62.39    5.80
  -5   1   3   51.09    5.10
  -5   1   3   59.69    3.90
  -4  -1   3   13.40    3.00
   4  -1  -3   12.40    2.50
  -4  -1   3   12.30    2.90
  -4  -1   3    8.90    2.20
  -4   1   3    9.60    1.90
  -4   1   3   11.10    2.50
  -4   1   3    7.80    2.30
  -3  -1   3   41.00    3.30
  -3  -1   3   39.40    3.20
  -3  -1   3   37.20    2.80
   3  -1  -3   38.90    2.80
  -3  -1   3   38.70    3.70
  -3   1   3   41.70    3.10
  -3   1   3   34.90    3.50
  -3   1   3   36.20    2.60
  -2  -1   3   65.79    3.30
   2  -1  -3   55.99    2.60
  -2  -1   3   59.59    2.50
   2  -1  -3   54.69    3.00
  -2  -1   3   58.09    3.30
  -2   1   3   61.99    3.30
  -2   1   3   55.99    2.70
  -2   1   3   60.09    2.90
  -1  -1   3    2.20    0.90
  -1  -1   3    2.40    1.00
   1  -1  -3    3.50    0.90
   1  -1  -3    3.80    0.80
  -1   1   3    2.70    0.90
  -1   1   3    2.00    0.70
   1   1  -3    4.20    1.00
   0  -1   3    2.00    0.70
   0  -1  -3    1.60    0.40
   0  -1   3   -0.10    0.50
   0  -1   3    0.70    0.60
   0  -1  -3    1.00    0.60
   0   1   3    2.20    0.80
   0   1   3    1.90    0.40
   0   1  -3    1.10    0.60
   1  -1   3    3.30    1.00
   1  -1   3    3.10    1.10
  -1  -1  -3    3.40    0.90
  -1  -1  -3    3.90    1.00
   1   1   3    3.10    0.90
  -1   1  -3    4.00    1.10
  -1   1  -3    1.40    0.80
  -2  -1  -3   61.39    3.50
  -2  -1  -3   58.29    3.20
   2  -1   3   61.99    3.40
  -2  -1  -3   66.99    2.90
   2  -1   3   58.69    3.10
   2   1   3   61.69    3.20
  -2   1  -3   58.49    3.40
  -2   1  -3   67.89    3.50
  -3  -1  -3   36.40    3.50
   3  -1   3   40.10    3.70
   3  -1   3   34.30    3.20
  -3  -1  -3   33.50    3.50
  -3  -1  -3   39.90    2.90
   3   1   3   42.00    3.40
  -3   1  -3   40.80    3.30
  -3   1  -3   38.10    3.60
  -4  -1  -3   13.00    2.60
   4  -1   3    9.20    2.30
   4  -1   3    8.30    2.50
  -4  -1  -3   13.30    3.00
  -4  -1  -3   13.20    2.70
   4   1   3   10.80    2.60
  -4   1  -3   10.00    2.70
  -4   1  -3   11.90    2.50
  -5  -1  -3   58.49    5.00
  -5  -1  -3   48.00    5.50
  -5  -1  -3   44.50    5.00
   5  -1   3   52.49    5.30
  -5   1  -3   46.10    5.10
  -5   1  -3   51.59    5.30
   5   1   3   46.80    5.00
   6  -1   3   30.70    4.60
  -6  -1  -3   28.90    4.90
  -6  -1  -3   30.80    4.40
  -6  -1  -3   30.60    4.90
  -6   1  -3   26.30    4.50
  -6   1  -3   27.00    4.70
  -7  -1  -3   84.89    8.40
  -7  -1  -3   72.09    6.80
  -7  -1  -3   69.59    8.20
   7  -1   3   68.09    7.50
  -7   1  -3   57.69    6.60
  -7   1  -3   76.89    7.80
  -8  -1  -3   19.20    5.20
   8  -1   3   32.60    6.10
  -8  -1  -3   20.30    5.80
  -8   1  -3   20.90    5.20
  -8   1  -3   24.90    6.10
  -8   1  -3   21.20    5.50
  -9  -1  -3   80.59   10.50
  -9   1  -3   76.89   10.20
  -9   1  -3   76.19    9.40
 -10  -1  -3    2.50    5.30
 -10   1  -3    9.40    6.20
 -10  -2   3   31.40    8.10
 -10  -2   3   34.30    7.70
 -10   2   3   32.20    8.00
 -10   2   3   26.30    7.80
  -9  -2   3    1.50    4.30
  -9  -2   3    2.30    4.60
  -9   2   3    8.10    5.20
  -9   2   3    1.90    4.80
  -8  -2   3   10.90    4.50
  -8  -2   3   -2.10    3.10
  -8  -2   3    4.20    3.80
  -8   2   3   -2.50    3.50
  -8   2   3    5.70    4.10
  -7  -2   3  399.56   15.90
  -7  -2   3  421.06   15.70
  -7  -2   3  384.06   15.80
  -7   2   3  384.46   15.00
  -7   2   3  398.66   15.30
  -6  -2   3   15.60    4.00
  -6  -2   3   18.70    3.90
   6  -2  -3   16.60    3.60
  -6  -2   3   14.50    3.90
  -6   2   3    9.80    3.60
  -6   2   3   12.30    3.50
  -5  -2   3   46.60    5.40
  -5  -2   3   32.70    3.50
  -5  -2   3   33.70    4.60
  -5  -2   3   43.00    5.10
   5  -2  -3   34.30    3.90
  -5   2   3   36.80    3.70
  -5   2   3   36.90    5.00
  -5   2   3   41.50    4.70
   4  -2  -3   66.39    4.30
  -4  -2   3   51.99    3.50
  -4  -2   3   60.89    5.30
  -4  -2   3   55.79    5.40
  -4  -2   3   49.00    4.80
   4  -2  -3   71.79    5.20
  -4   2   3   53.79    3.80
  -4   2   3   40.10    4.70
  -4   2   3   49.50    4.50
   3  -2  -3  103.79    5.10
  -3  -2   3  104.89    3.60
  -3  -2   3   98.39    5.10
  -3  -2   3   94.19    5.30
   3  -2  -3  108.99    4.40
  -3   2   3   95.49    5.40
  -3   2   3  109.49    5.10
  -3   2   3  103.69    4.60
   2  -2  -3  286.47    7.20
   2  -2  -3  286.57    5.70
  -2  -2   3  288.57    8.20
  -2  -2   3  283.07    7.80
  -2   2   3  278.27    7.20
  -2   2   3  273.17    8.00
  -2   2   3  276.47    7.00
   1  -2  -3 1996.80   25.30
  -1  -2   3 2006.70   27.00
  -1  -2   3 2032.60   26.50
  -1   2   3 2045.60   26.80
  -1   2   3 2062.39   25.60
  -1   2   3 2038.90   27.10
   1   2  -3 2090.89   27.40
   0  -2  -3 5871.01   64.89
   0  -2   3 5879.41   65.29
   0  -2   3 5857.41   66.19
   0  -2  -3 5873.31   64.29
   0   2  -3 5896.51   64.49
   0   2   3 5904.21   65.19
   0   2   3 5950.50   66.69
   0   2  -3 6013.60   66.99
   1  -2   3 2053.39   26.10
  -1  -2  -3 2049.29   26.90
   1  -2   3 2095.09   27.30
  -1  -2  -3 2065.39   24.40
  -1   2  -3 2059.79   26.70
   1   2   3 2040.60   26.30
  -1   2  -3 2067.89   27.20
   2  -2   3  289.97    7.90
  -2  -2  -3  273.47    5.70
   2  -2   3  291.17    7.30
  -2  -2  -3  277.57    7.90
  -2   2  -3  268.97    7.70
  -2   2  -3  286.27    7.80
   3  -2   3  107.89    5.00
  -3  -2  -3  100.19    4.00
   3  -2   3   93.79    5.20
  -3  -2  -3  103.69    5.60
  -3  -2  -3  111.39    5.60
  -3   2  -3  100.19    5.40
  -3   2  -3  109.29    5.60
  -4  -2  -3   63.19    5.70
  -4  -2  -3   46.30    3.70
   4  -2   3   59.79    4.40
  -4  -2  -3   53.99    5.10
   4  -2   3   59.69    4.80
  -4   2  -3   57.09    5.50
  -4   2  -3   61.49    4.90
  -5  -2  -3   37.60    4.80
   5  -2   3   34.30    4.40
  -5  -2  -3   37.60    5.20
  -5  -2  -3   31.20    3.60
   5  -2   3   38.00    5.10
  -5   2  -3   39.70    4.90
  -5   2  -3   31.40    4.40
  -6  -2  -3   17.00    4.00
  -6  -2  -3   16.80    4.20
   6  -2   3   16.40    4.00
  -6   2  -3    8.50    3.50
  -6   2  -3   22.60    4.20
   7  -2   3  375.46   14.30
  -7  -2  -3  372.26   15.40
  -7  -2  -3  385.86   15.90
  -7   2  -3  374.26   15.20
  -7   2  -3  395.06   15.30
   8  -2   3   -5.00    3.60
  -8  -2  -3    4.50    4.00
  -8  -2  -3    8.50    4.30
  -8   2  -3    0.60    3.30
  -8   2  -3   -0.70    3.70
  -9  -2  -3    1.80    4.90
   9  -2   3   12.10    5.10
  -9   2  -3    1.20    4.80
 -10  -2  -3   31.70    8.00
 -10   2  -3   18.60    7.00
 -10   2  -3   17.70    7.30
 -10  -3   3    6.90    5.70
 -10  -3   3   -3.00    5.50
 -10   3   3    8.00    6.30
 -10   3   3    2.10    6.00
  -9  -3   3  150.28   13.90
  -9  -3   3  124.99   11.70
  -9   3   3  167.08   12.60
  -8  -3   3   51.19    8.00
  -8  -3   3   50.19    7.60
  -8   3   3   32.90    6.60
  -8   3   3   43.90    6.90
   7  -3  -3   53.79    6.40
  -7  -3   3   43.50    6.60
  -7  -3   3   52.29    7.00
  -7  -3   3   44.50    7.30
  -7   3   3   46.80    6.50
  -7   3   3   54.49    7.10
  -6  -3   3    4.20    2.90
   6  -3  -3    9.30    3.70
  -6  -3   3   11.20    3.60
   6  -3  -3   13.00    3.60
  -6  -3   3    9.70    3.70
  -6   3   3    8.90    3.60
  -6   3   3   11.40    3.50
  -5  -3   3   46.70    5.40
   5  -3  -3   39.10    4.20
  -5  -3   3   47.00    5.80
  -5  -3   3   39.90    5.10
   5  -3  -3   26.50    3.90
  -5   3   3   39.20    5.30
  -5   3   3   42.50    4.30
  -5   3   3   29.70    4.30
   4  -3  -3  132.39    7.00
  -4  -3   3  157.18    7.60
   4  -3  -3  122.49    5.70
  -4  -3   3  190.08    8.90
  -4   3   3  127.79    7.40
  -4   3   3  124.29    5.90
  -4   3   3  122.69    6.60
  -3  -3   3  486.35   12.60
  -3  -3   3  464.65   13.10
   3  -3  -3  494.25   12.00
   3  -3  -3  486.75    9.70
  -3   3   3  483.95   13.00
  -3   3   3  481.35   11.80
  -3   3   3  476.45   11.40
  -2  -3   3  532.35   12.80
   2  -3  -3  520.85    8.90
   2  -3  -3  530.55   11.50
  -2  -3   3  521.65   12.00
  -2   3   3  512.35   11.50
   2   3  -3  495.25   12.00
  -2   3   3  522.95   12.30
  -2   3   3  535.25   11.30
   1  -3  -3  381.86    8.70
  -1  -3   3  329.17    9.20
   1  -3  -3  370.46    6.30
  -1  -3   3  335.27    8.60
  -1   3   3  333.47    8.60
  -1   3   3  337.67    8.80
   1   3  -3  340.57    9.00
   0  -3   3   17.40    2.40
   0  -3  -3   20.00    2.30
   0  -3  -3   15.30    1.50
   0  -3   3   15.90    2.00
   0   3  -3   16.30    2.30
   0   3   3   15.10    1.80
   0   3   3   18.60    2.10
   0   3  -3   15.40    1.70
   1  -3   3  321.17    7.70
  -1  -3  -3  315.77    8.50
   1  -3   3  321.37    8.60
  -1  -3  -3  328.07    7.40
  -1   3  -3  316.47    8.60
   1   3   3  327.27    8.20
  -1   3  -3  325.07    8.10
   2  -3   3  504.65   11.90
  -2  -3  -3  513.45    8.30
  -2  -3  -3  516.65   12.30
  -2  -3  -3  515.05   11.20
   2  -3   3  503.05   10.60
  -2   3  -3  527.65   12.00
  -2   3  -3  519.55   12.20
   3  -3   3  478.65   12.40
  -3  -3  -3  472.35   12.80
   3  -3   3  487.45   11.20
  -3  -3  -3  458.15   11.70
  -3  -3  -3  457.65    8.40
  -3   3  -3  491.35   12.80
  -3   3  -3  468.85   12.50
  -4  -3  -3  114.29    7.30
   4  -3   3  112.79    6.00
  -4  -3  -3  108.89    6.50
   4  -3   3  105.19    6.70
  -4  -3  -3  113.89    4.50
  -4   3  -3  114.89    6.70
   5  -3   3   30.80    4.20
  -5  -3  -3   34.90    5.30
  -5  -3  -3   32.40    4.60
   5  -3   3   31.40    4.70
  -5   3  -3   33.60    5.00
  -5   3  -3   37.30    5.00
   6  -3   3    7.20    3.00
  -6  -3  -3   12.50    3.90
   6  -3   3    7.60    3.60
  -6  -3  -3    8.40    3.40
  -6   3  -3   11.20    3.60
  -6   3  -3    6.30    3.20
  -7  -3  -3   55.19    7.50
  -7  -3  -3   50.49    7.00
   7  -3   3   59.89    7.00
  -7   3  -3   49.10    7.00
  -7   3  -3   40.30    6.40
  -8  -3  -3   32.80    7.00
   8  -3   3   47.60    6.90
  -8   3  -3   36.80    7.10
   9  -3   3  129.69   11.70
  -9  -3  -3  115.49   12.20
  -9  -3  -3  142.69   12.60
  -9   3  -3  131.69   12.10
 -10  -3  -3    4.00    5.60
 -10  -3  -3   12.70    6.70
 -10   3  -3    7.50    6.50
  -9  -4   3   22.30    7.40
  -9  -4   3   23.20    6.30
  -9   4   3   20.40    6.90
  -8  -4   3   87.89   10.50
  -8  -4   3   82.29    9.40
  -8   4   3   84.09    9.40
  -7  -4   3    1.60    3.70
  -7  -4   3    4.00    3.80
   7  -4  -3   -1.00    3.60
  -7  -4   3    1.60    3.50
  -7   4   3   -3.10    3.50
  -7   4   3   -0.20    3.20
   6  -4  -3   15.10    4.40
  -6  -4   3   15.50    4.20
  -6  -4   3   12.70    4.30
  -6  -4   3   15.40    4.40
   6  -4  -3   17.10    3.90
  -6   4   3   18.20    4.70
  -6   4   3   12.80    4.00
   5  -4  -3   37.70    5.20
   5  -4  -3   37.90    4.40
  -5  -4   3   40.90    5.60
  -5  -4   3   34.70    5.40
  -5   4   3   36.20    4.50
  -5   4   3   29.20    4.60
  -5   4   3   32.00    5.30
  -4  -4   3   23.80    4.40
   4  -4  -3   20.90    2.90
  -4  -4   3   19.90    3.70
   4  -4  -3   22.80    3.80
  -4   4   3   27.90    4.00
  -4   4   3   16.20    3.40
  -4   4   3   21.60    3.40
  -3  -4   3  151.08    8.10
  -3  -4   3  151.78    7.50
   3  -4  -3  149.88    5.40
   3  -4  -3  143.09    7.00
  -3   4   3  143.99    6.90
  -3   4   3  156.98    7.10
  -3   4   3  146.69    7.70
  -2  -4   3   14.20    3.20
   2  -4  -3    8.00    2.30
  -2  -4   3   12.30    2.50
   2  -4  -3    9.10    1.70
  -2   4   3   11.00    2.70
  -2   4   3   11.20    2.30
  -1  -4   3   87.29    5.60
   1  -4  -3   83.59    3.30
   1  -4  -3   79.19    4.70
  -1  -4   3   79.09    4.50
   1   4  -3   74.89    5.10
  -1   4   3   74.39    4.60
   1   4  -3   76.29    2.90
  -1   4   3   75.19    4.40
   0  -4   3  140.69    6.50
   0  -4   3  112.49    5.10
   0  -4  -3  109.69    4.20
   0  -4  -3  116.89    5.60
   0   4  -3  113.49    4.60
   0   4   3  120.59    5.00
   0   4   3  125.49    5.60
   0   4  -3  117.39    5.90
  -1  -4  -3   80.69    5.10
   1  -4   3   76.89    4.20
  -1  -4  -3   80.89    4.10
   1  -4   3   75.09    4.90
   1   4   3   71.09    4.50
  -1   4  -3   71.89    4.30
  -1   4  -3   85.79    5.00
  -2  -4  -3    6.50    1.90
  -2  -4  -3   15.20    3.20
   2  -4   3   17.10    2.90
   2  -4   3    8.90    2.20
   2   4   3   10.30    2.40
  -2   4  -3    9.40    2.50
  -2   4  -3   11.80    2.60
  -3  -4  -3  134.89    6.70
   3  -4   3  149.09    7.30
  -3  -4  -3  145.99    4.10
   3  -4   3  147.39    6.40
  -3  -4  -3  146.29    7.90
  -3   4  -3  139.79    7.10
  -3   4  -3  142.59    7.40
  -4  -4  -3   20.30    4.00
   4  -4   3   26.30    4.10
  -4  -4  -3   22.90    3.90
   4  -4   3   23.00    3.50
  -4   4  -3   19.70    3.90
  -4   4  -3   24.40    3.90
  -5  -4  -3   42.20    5.30
  -5  -4  -3   39.20    5.30
   5  -4   3   38.50    4.80
   5  -4   3   39.00    5.50
  -5  -4  -3   23.70    4.80
  -5   4  -3   28.00    4.50
  -5   4  -3   40.30    5.60
  -6  -4  -3   11.70    3.80
  -6  -4  -3   23.90    5.10
   6  -4   3   19.70    4.20
   6  -4   3   20.90    4.80
  -6  -4  -3   17.20    4.40
  -6   4  -3   18.80    4.80
  -6   4  -3   27.80    5.20
  -7  -4  -3   -0.50    3.50
   7  -4   3   -2.40    3.70
  -7  -4  -3    8.00    3.90
  -7  -4  -3    5.10    4.40
   7  -4   3    2.90    3.50
  -7   4  -3    2.40    3.10
  -7   4  -3   -2.50    3.60
  -8  -4  -3   82.39   10.20
   8  -4   3  100.39    9.80
  -8  -4  -3   93.79   10.10
  -8   4  -3   86.09    9.60
  -9  -4  -3   27.20    6.60
   9  -4   3   23.60    6.70
  -9  -4  -3   30.40    7.50
  -9   4  -3   23.40    6.70
  -9  -5   3   36.70    8.60
  -9  -5   3   44.30    7.90
  -9   5   3   46.10    8.60
  -8  -5   3   -3.60    3.90
  -8  -5   3   -7.30    4.40
  -8   5   3    3.70    4.80
   7  -5  -3  319.57   15.00
  -7  -5   3  307.67   15.30
  -7  -5   3  322.67   16.60
  -7   5   3  289.67   14.30
  -7   5   3  294.97   15.10
  -6  -5   3   56.89    7.90
  -6  -5   3   65.69    7.80
   6  -5  -3   77.59    8.00
  -6   5   3   43.60    6.70
  -6   5   3   58.79    7.00
  -5  -5   3    7.10    3.50
  -5  -5   3   12.30    3.90
   5  -5  -3    5.30    3.40
  -5   5   3   11.90    3.90
  -5   5   3    8.70    3.40
  -4  -5   3    7.00    2.80
  -4  -5   3    8.10    3.30
   4  -5  -3   10.20    3.20
  -4   5   3    8.10    2.90
  -4   5   3   10.00    3.10
  -3  -5   3  157.88    8.70
   3  -5  -3  154.98    5.80
   3  -5  -3  170.88    8.10
  -3  -5   3  169.08    8.30
  -3   5   3  161.48    7.80
  -3   5   3  175.08    8.60
   3   5  -3  161.48    8.70
  -2  -5   3  258.57    9.50
  -2  -5   3  231.28   10.10
   2  -5  -3  255.67    6.80
   2  -5  -3  256.77    9.40
  -2   5   3  237.98    8.90
  -2   5   3  241.18    9.40
   2   5  -3  229.38    9.50
   1  -5  -3  214.88    8.30
   1  -5  -3  194.28    5.80
  -1  -5   3  196.08    9.00
  -1  -5   3  200.08    7.70
   1   5  -3  204.28    5.50
  -1   5   3  218.88    8.10
  -1   5   3  209.68    8.10
   1   5  -3  207.28    8.70
   0  -5  -3    0.90    1.40
   0  -5  -3    1.70    1.90
   0  -5   3   -0.60    1.70
   0  -5   3    1.60    1.80
   0   5   3   -0.30    1.70
   0   5   3   -1.20    1.60
   0   5  -3    2.40    2.20
   0   5  -3    1.00    1.50
   1  -5   3  220.08    8.70
  -1  -5  -3  201.48    7.10
   1  -5   3  203.78    7.30
  -1  -5  -3  202.68    8.60
  -1   5  -3  203.58    8.70
   1   5   3  195.38    6.20
   1   5   3  206.28    8.30
  -1   5  -3  205.88    7.50
   2  -5   3  262.87   10.10
   2  -5   3  247.38    8.30
  -2  -5  -3  257.27   10.30
  -2  -5  -3  244.88    8.60
  -2   5  -3  254.87    9.40
  -2   5  -3  259.67   10.00
   2   5   3  262.77    9.80
  -3  -5  -3  160.88    7.70
   3  -5   3  150.08    8.20
   3  -5   3  165.68    7.10
  -3  -5  -3  153.78    8.70
  -3   5  -3  167.38    8.40
  -3   5  -3  153.48    8.20
   4  -5   3   10.50    3.60
   4  -5   3   10.00    3.00
  -4  -5  -3    6.40    3.20
  -4  -5  -3    9.60    2.80
  -4   5  -3    9.80    3.40
  -4   5  -3   10.40    3.20
  -5  -5  -3    5.20    3.00
   5  -5   3    8.80    3.20
   5  -5   3    6.60    3.70
  -5  -5  -3    8.50    4.10
  -5   5  -3    2.00    3.30
  -5   5  -3    5.20    3.00
   6  -5   3   56.39    6.50
  -6  -5  -3   65.79    7.70
  -6  -5  -3   61.79    8.10
   6  -5   3   55.99    7.30
  -6  -5  -3   49.40    6.80
  -6   5  -3   51.69    7.20
  -6   5  -3   48.40    6.90
  -7  -5  -3  344.17   15.60
  -7  -5  -3  316.77   15.50
   7  -5   3  315.67   13.40
  -7  -5  -3  307.47   16.20
   7  -5   3  287.97   14.80
  -7   5  -3  313.17   14.90
  -7   5  -3  311.27   15.50
  -8  -5  -3    1.40    3.70
  -8  -5  -3    1.90    5.10
   8  -5   3    6.30    4.60
  -8   5  -3    5.30    5.40
  -9  -5  -3   38.60    8.40
  -9  -5  -3   45.40    8.40
  -9   5  -3   36.20    8.40
  -9  -6   3   33.70   10.10
  -9   6   3   15.10    8.40
  -8  -6   3   -0.70    4.00
   8  -6  -3   -3.50    4.80
  -8  -6   3   -5.60    4.60
  -8   6   3   -1.70    4.30
  -7  -6   3   40.50    7.40
   7  -6  -3   32.10    6.60
  -7  -6   3   39.50    8.00
  -7   6   3   44.10    7.70
  -7   6   3   30.00    6.20
  -6  -6   3  314.17   15.90
   6  -6  -3  311.87   14.40
  -6  -6   3  320.27   15.10
  -6   6   3  312.17   15.20
  -6   6   3  317.37   14.30
  -5  -6   3  111.19    8.90
   5  -6  -3  113.89    8.90
  -5  -6   3  114.29   10.50
  -5   6   3  107.79    8.60
  -5   6   3  117.89    9.40
  -4  -6   3   24.80    5.10
   4  -6  -3    8.10    3.50
  -4  -6   3   15.40    4.10
  -4   6   3   16.00    3.90
  -4   6   3    9.40    4.00
   3  -6  -3    3.30    2.70
  -3  -6   3    0.10    2.20
  -3  -6   3    1.60    2.80
   3   6  -3    0.60    2.40
  -3   6   3    2.50    2.40
  -3   6   3   -0.70    2.40
  -2  -6   3   70.29    5.50
   2  -6  -3   83.09    6.30
  -2  -6   3   89.49    7.10
  -2   6   3   81.79    6.40
  -2   6   3   84.59    6.20
   2   6  -3   75.69    6.30
   1  -6  -3  165.08    6.00
   1  -6  -3  162.88    8.00
  -1  -6   3  169.58    7.80
  -1  -6   3  193.58    9.20
  -1   6   3  160.18    8.10
  -1   6   3  168.58    7.80
   1   6  -3  195.18    9.30
   0  -6  -3  193.78    8.90
   0  -6  -3  196.08    6.90
   0  -6   3  210.88    9.60
   0  -6   3  228.08    8.40
   0   6  -3  220.68    9.80
   0   6  -3  222.58    7.60
   0   6   3  226.98    9.30
   0   6   3  213.78    8.00
   1  -6   3  178.28    8.90
  -1  -6  -3  154.88    6.70
   1  -6   3  178.68    7.40
  -1  -6  -3  165.18    8.50
  -1   6  -3  188.68    8.90
  -1   6  -3  195.68    7.90
   1   6   3  164.48    8.40
   2  -6   3   86.49    5.50
   2  -6   3   90.39    6.80
  -2  -6  -3   90.69    5.90
  -2  -6  -3   80.09    6.60
  -2   6  -3   75.09    5.80
  -2   6  -3   74.19    6.10
   2   6   3   85.79    6.50
  -3  -6  -3    2.30    2.40
   3  -6   3    1.60    2.60
  -3  -6  -3   -2.20    2.70
   3  -6   3    2.10    2.20
  -3   6  -3   -1.40    1.90
  -3   6  -3    7.60    3.00
   4  -6   3   19.30    3.70
  -4  -6  -3   13.70    4.40
   4  -6   3   18.00    4.50
  -4  -6  -3   15.70    3.80
  -4   6  -3   16.30    4.20
  -4   6  -3   18.00    4.40
   5  -6   3  110.89    9.00
  -5  -6  -3  109.59   10.30
   5  -6   3  101.79    7.30
  -5  -6  -3  109.59    8.20
  -5   6  -3  101.49    9.20
  -5   6  -3   99.69    9.30
  -6  -6  -3  315.47   16.20
  -6  -6  -3  332.67   14.80
   6  -6   3  335.07   15.20
  -6   6  -3  305.77   15.00
  -6   6  -3  343.77   15.50
  -7  -6  -3   30.20    7.00
   7  -6   3   44.80    7.60
  -7  -6  -3   42.70    7.30
  -7   6  -3   57.39    8.40
   8  -6   3   -0.90    5.10
  -8  -6  -3    0.60    4.40
  -8  -6  -3   -2.20    5.30
  -8   6  -3   -1.80    5.50
  -9  -6  -3   29.40   10.00
   9  -6   3   25.20    7.90
  -9   6  -3   15.80    7.70
  -8  -7   3   15.60    5.90
  -8  -7   3    0.90    6.00
   8  -7  -3   10.50    6.20
  -8   7   3   13.50    6.70
  -7  -7   3  103.09   11.80
  -7  -7   3   97.79   10.80
   7  -7  -3   85.59   10.30
  -7   7   3   82.39   10.00
  -6  -7   3   29.40    6.20
  -6  -7   3   26.90    6.20
   6  -7  -3   27.60    6.30
  -6   7   3   20.10    5.90
  -6   7   3   26.40    6.00
  -5  -7   3  101.79   10.20
  -5  -7   3  115.79   10.30
   5  -7  -3   88.99    8.90
  -5   7   3   95.39    8.90
  -5   7   3  101.09   10.00
   4  -7  -3   54.79    6.90
  -4  -7   3   43.60    6.80
  -4  -7   3   38.10    5.80
  -4   7   3   40.00    6.10
  -4   7   3   34.90    5.90
  -3  -7   3   29.00    5.20
   3  -7  -3   24.60    4.70
  -3  -7   3   23.10    5.20
   3   7  -3   19.10    4.70
  -3   7   3   29.00    5.20
  -3   7   3   19.20    4.30
  -2  -7   3    4.90    2.60
   2  -7  -3    3.60    2.80
  -2  -7   3    7.60    3.60
   2   7  -3   16.40    4.40
  -2   7   3    3.80    2.80
  -2   7   3    6.00    3.10
  -1  -7   3   14.00    3.90
   1  -7  -3   19.80    4.10
  -1  -7   3   21.90    3.70
  -1   7   3   17.10    4.10
  -1   7   3   15.60    3.60
   1   7  -3   19.50    4.10
   0  -7   3   -2.10    2.30
   0  -7   3   -0.50    2.00
   0  -7  -3    3.30    2.50
   0   7  -3    0.80    2.40
   0   7   3    1.10    2.40
  -1  -7  -3   16.10    4.00
   1  -7   3   13.70    3.80
   1  -7   3   10.10    3.00
  -1  -7  -3   20.20    3.20
   1   7   3   19.50    4.10
  -1   7  -3   15.10    4.10
  -1   7  -3   16.00    3.50
  -2  -7  -3    5.30    3.60
  -2  -7  -3    2.90    2.40
   2  -7   3    6.90    2.80
   2  -7   3    1.50    2.70
  -2   7  -3    4.90    3.00
   2   7   3    6.20    3.30
  -2   7  -3    7.40    3.10
   3  -7   3   25.40    4.90
  -3  -7  -3   19.80    4.20
   3  -7   3   26.50    4.30
  -3  -7  -3   19.10    5.10
  -3   7  -3   23.70    4.70
  -3   7  -3   22.50    4.70
  -4  -7  -3   37.80    5.60
  -4  -7  -3   39.00    6.90
   4  -7   3   45.10    6.30
  -4   7  -3   47.60    6.70
  -4   7  -3   42.80    6.50
  -5  -7  -3  104.19    9.40
   5  -7   3  100.89    9.60
  -5  -7  -3   97.79   10.40
  -5   7  -3   98.39    9.70
  -5   7  -3  103.69    9.60
  -6  -7  -3   26.30    6.00
  -6  -7  -3   23.90    6.90
   6  -7   3   30.00    6.20
  -6   7  -3   36.10    7.30
  -7  -7  -3   94.39   10.70
  -7  -7  -3  102.09   11.70
   7  -7   3   81.09   10.20
  -7   7  -3  120.89   12.00
  -8  -7  -3   16.40    7.20
   8  -7   3    9.20    6.50
  -8  -7  -3    9.80    6.30
  -8   7  -3   25.10    8.00
   7  -8  -3   25.10    7.20
  -7  -8   3   19.50    6.60
  -7  -8   3   24.60    7.10
  -7   8   3   22.50    7.50
  -6  -8   3  133.99   12.40
  -6  -8   3  128.69   13.30
   6  -8  -3   99.99   11.00
  -6   8   3  118.69   11.70
  -5  -8   3    3.30    4.30
   5  -8  -3    0.70    4.00
  -5  -8   3   -3.90    4.20
  -5   8   3    5.30    4.50
  -5   8   3    2.00    3.90
  -4  -8   3   -5.70    2.90
   4  -8  -3   -3.40    3.20
  -4  -8   3    0.90    3.50
  -4   8   3    2.40    4.10
  -4   8   3    2.00    4.10
   3  -8  -3  225.88   12.00
  -3  -8   3  211.18   11.00
  -3  -8   3  227.28   13.10
   3   8  -3  219.58   12.70
  -3   8   3  203.38   11.50
  -3   8   3  204.48   11.50
   2  -8  -3   -1.10    3.20
  -2  -8   3    3.80    3.90
  -2  -8   3    8.50    3.40
  -2   8   3    4.80    3.70
  -2   8   3    4.30    3.40
   2   8  -3    1.90    3.80
   1  -8  -3   79.19    7.80
  -1  -8   3   66.09    7.70
  -1  -8   3   73.09    6.70
  -1   8   3   80.89    8.00
   1   8  -3   75.09    7.90
   0  -8   3   90.59    6.60
   0  -8  -3   95.29    8.00
   0  -8   3  110.89    8.60
   0   8  -3   89.09    8.50
   0   8   3  103.49    8.30
  -1  -8  -3   81.49    8.20
   1  -8   3   68.89    7.70
   1  -8   3   81.29    6.50
  -1   8  -3   74.89    8.00
   1   8   3   76.49    7.70
  -2  -8  -3   -1.00    2.90
   2  -8   3    6.50    3.90
  -2  -8  -3    5.50    3.80
   2   8   3    1.70    3.10
  -2   8  -3    6.70    3.50
  -2   8  -3    5.80    3.40
  -3  -8  -3  199.38   10.40
  -3  -8  -3  235.28   13.00
   3  -8   3  206.38   11.80
  -3   8  -3  209.28   11.40
  -3   8  -3  213.88   12.10
   3   8   3  221.68   12.00
   4  -8   3   -1.10    3.10
  -4  -8  -3   -0.30    4.00
  -4  -8  -3   -4.50    3.00
  -4   8  -3    0.00    4.00
  -4   8  -3    1.70    3.90
   5  -8   3    3.70    4.70
  -5  -8  -3    6.30    5.50
  -5  -8  -3    4.10    4.00
  -5   8  -3    7.50    4.90
   6  -8   3  114.89   11.30
  -6  -8  -3  109.59   10.40
  -6  -8  -3  109.19   12.00
  -6   8  -3  131.19   12.30
  -7  -8  -3   13.40    6.00
   7  -8   3   15.40    6.70
  -7  -8  -3   22.80    7.60
  -7   8  -3   29.50    8.20
  -6  -9   3   18.70    6.70
   6  -9  -3    5.80    5.90
  -6  -9   3   15.10    7.20
  -6   9   3   11.40    6.40
  -5  -9   3   11.20    6.00
   5  -9  -3    4.10    4.80
  -5  -9   3   11.90    5.30
  -5   9   3   11.70    5.50
  -4  -9   3   14.90    4.80
   4  -9  -3   20.30    5.90
  -4  -9   3   13.90    5.70
  -4   9   3    9.30    5.30
  -4   9   3    9.70    5.50
  -3  -9   3   32.50    6.90
   3  -9  -3   36.60    6.80
  -3  -9   3   23.60    5.50
  -3   9   3   31.90    6.40
  -3   9   3   34.00    6.60
  -2  -9   3    6.30    3.90
  -2  -9   3   -2.00    3.80
   2  -9  -3    7.30    4.10
  -2   9   3   -1.70    3.60
   2   9  -3   -1.60    3.90
   1  -9  -3    6.40    3.90
  -1  -9   3    6.30    3.80
  -1  -9   3    8.40    3.90
  -1   9   3    2.60    3.70
   1   9  -3    6.80    4.40
   0  -9   3   -2.40    3.20
   0  -9  -3   -0.40    3.30
   0   9   3   -0.50    3.30
   0   9  -3   -0.20    3.90
   1  -9   3   10.20    4.00
  -1  -9  -3    7.90    4.30
   1   9   3    5.30    4.40
  -1   9  -3    8.10    4.70
  -2  -9  -3    0.40    4.00
   2  -9   3   -0.30    4.00
  -2   9  -3   10.50    4.30
   2   9   3   10.50    4.50
  -3  -9  -3   35.10    6.90
   3  -9   3   28.20    5.70
   3   9   3   21.90    6.00
  -3   9  -3   32.60    6.30
  -3   9  -3   22.50    5.40
   4  -9   3   10.20    5.40
  -4  -9  -3    8.90    5.60
  -4   9  -3   18.40    5.90
   5  -9   3    4.80    4.40
  -5  -9  -3   12.90    6.50
  -5  -9  -3    8.90    5.10
  -5   9  -3    8.60    5.90
   6  -9   3   12.70    5.90
  -6  -9  -3    1.80    5.90
  -6  -9  -3   11.90    5.60
  -6   9  -3   11.70    6.80
   5 -10  -3    7.40    6.10
  -5 -10   3   12.50    6.40
  -5 -10   3    0.50    4.80
  -5  10   3    4.20    5.70
  -4 -10   3    4.90    5.00
  -4 -10   3   17.70    6.60
   4 -10  -3    7.40    5.40
  -4  10   3    2.50    5.10
  -3 -10   3   78.89    9.20
   3 -10  -3   71.99    9.20
  -3 -10   3   84.89   10.00
  -2 -10   3   59.29    9.10
   2 -10  -3   67.69    8.90
  -2  10   3   62.79    8.50
   1 -10  -3   65.49    8.30
  -1 -10   3   89.99   10.00
  -1  10   3   79.99    9.20
   0 -10   3   67.99    8.90
   0 -10  -3   73.19    9.00
   0  10   3   65.89    8.80
   1 -10   3   56.09    8.30
  -1 -10  -3   93.99   10.00
   1  10   3   65.79    8.60
  -2 -10  -3   80.09    9.80
   2 -10   3   67.09    9.10
  -3 -10  -3   79.29   10.10
   3 -10   3   74.69    9.30
  -4 -10  -3   11.00    6.20
   4 -10   3    9.90    5.60
   5 -10   3   11.70    6.00
  -5 -10  -3   14.80    6.80
  -5  10  -3   13.20    6.80
  -4 -11   3   -4.20    5.70
   3 -11  -3   12.50    6.30
  -3 -11   3    9.40    6.50
   2 -11  -3    4.50    5.00
  -2 -11   3    5.70    5.80
   1 -11  -3   -2.10    4.50
  -1 -11   3   -0.50    4.50
   0 -11   3    2.00    5.20
   0 -11  -3   -1.50    4.30
   1 -11   3    5.30    5.30
  -1 -11  -3    5.20    4.90
  -2 -11  -3   17.30    6.40
   2 -11   3    7.50    5.60
   3 -11   3    1.90    5.30
  -3 -11  -3   15.60    6.90
  -4 -11  -3   -1.80    6.10
 -10   0   4   20.20    7.00
 -10   0   4   14.10    6.20
  -9   0   4   76.69    9.10
  -9   0   4   72.69    9.70
  -8   0   4   32.30    6.00
  -8   0   4   19.00    5.20
  -7   0   4   41.00    6.00
  -7   0   4   51.49    7.00
  -7   0   4   55.99    6.20
  -6   0   4  459.45   13.80
  -6   0   4  463.35   14.80
  -6   0   4  468.75   15.40
  -5   0   4  108.59    6.60
  -5   0   4  108.89    5.20
  -5   0   4  106.09    6.30
  -5   0   4  105.39    6.70
  -4   0   4  649.83   14.90
  -4   0   4  641.94   12.30
  -4   0   4  653.43   14.30
  -4   0   4  664.23   14.80
  -3   0   4  673.43   13.20
  -3   0   4  648.64   13.20
  -3   0   4  658.33   11.80
  -3   0   4  657.13   12.90
  -2   0   4   -0.20    0.80
  -2   0   4   -1.00    0.70
  -2   0   4   -0.10    0.80
  -2   0   4   -0.70    0.70
  -1   0   4 6383.86   69.19
   1   0  -4 6318.97   68.89
  -1   0   4 6338.17   68.39
   0   0   4 2179.48   23.90
   0   0   4 2187.58   25.30
   0   0  -4 2195.68   23.90
   0   0  -4 2198.48   25.60
   1   0   4 6381.06   69.59
   1   0   4 6441.46   69.29
   1   0   4 6491.25   69.79
  -1   0  -4 6435.66   70.19
  -1   0  -4 6364.36   69.49
   2   0   4    1.10    1.00
  -2   0  -4    0.80    1.10
  -2   0  -4   -0.90    0.90
  -3   0  -4  649.83   13.30
   3   0   4  641.44   12.80
  -3   0  -4  642.54   12.70
  -4   0  -4  622.14   13.90
  -4   0  -4  630.54   14.70
   4   0   4  638.84   14.40
  -5   0  -4  100.69    6.20
   5   0   4  108.99    6.60
  -5   0  -4   94.79    6.40
   6   0   4  447.16   14.50
  -6   0  -4  478.75   14.40
  -6   0  -4  438.26   15.40
  -6   0  -4  478.85   15.40
  -7   0  -4   36.70    5.80
  -7   0  -4   45.50    6.10
   7   0   4   40.00    6.10
  -7   0  -4   40.80    6.30
  -8   0  -4   19.70    5.30
  -8   0  -4   21.00    5.90
  -8   0  -4   20.00    5.50
  -9   0  -4   71.09    9.80
 -10   0  -4    5.50    5.60
 -10  -1   4    7.60    5.50
 -10  -1   4   11.20    5.90
 -10   1   4    3.00    5.30
  -9  -1   4   70.29    9.60
  -9  -1   4   78.09    9.50
  -9   1   4   50.39    8.40
  -9   1   4   74.29   10.80
  -8  -1   4  322.97   15.70
  -8  -1   4  293.07   14.00
  -8  -1   4  327.77   15.30
  -8   1   4  296.87   14.70
  -8   1   4  285.97   13.70
  -8   1   4  289.57   14.10
  -7  -1   4  388.66   14.60
  -7  -1   4  377.86   15.40
  -7  -1   4  390.16   15.20
  -7   1   4  375.06   15.10
  -7   1   4  379.96   14.70
  -7   1   4  337.67   13.60
  -6  -1   4   71.99    7.00
  -6  -1   4   83.79    7.40
  -6  -1   4   81.39    6.70
  -6  -1   4   81.49    6.10
  -6   1   4   79.89    7.10
  -6   1   4   82.29    6.70
  -5  -1   4   11.80    3.30
  -5  -1   4   13.90    3.20
  -5  -1   4    9.10    2.50
  -5  -1   4   11.20    2.70
  -5  -1   4   11.60    2.30
  -5   1   4   13.50    2.50
  -5   1   4    9.20    2.60
  -5   1   4   14.90    3.30
  -4  -1   4 1002.40   19.10
  -4  -1   4 1013.50   20.00
  -4  -1   4 1019.10   19.60
  -4  -1   4  980.20   17.30
  -4   1   4  999.60   16.70
  -4   1   4  988.60   18.70
  -4   1   4  980.40   19.40
  -3  -1   4  840.12   15.90
  -3  -1   4  839.82   14.00
  -3  -1   4  842.12   16.10
  -3  -1   4  849.02   15.70
  -3   1   4  846.82   15.10
  -3   1   4  809.92   15.90
  -3   1   4  822.82   14.00
  -2  -1   4 2319.27   30.40
   2  -1  -4 2275.77   28.80
  -2  -1   4 2343.07   30.20
  -2   1   4 2303.47   29.10
  -2   1   4 2344.17   28.80
  -2   1   4 2255.47   30.40
  -1  -1   4 4598.64   52.49
   1  -1  -4 4645.24   50.39
   1  -1  -4 4789.62   50.89
  -1  -1   4 4574.84   52.59
  -1   1   4 4687.13   50.09
   1   1  -4 4652.53   50.49
  -1   1   4 4596.94   52.19
   1   1  -4 4564.14   52.09
   0  -1   4    1.20    0.80
   0  -1   4    1.00    0.70
   0  -1  -4    0.20    0.40
   0  -1  -4    2.40    0.90
   0  -1   4    0.50    0.60
   0   1  -4    0.10    0.70
   0   1   4    0.40    0.70
   0   1  -4    1.50    0.80
   0   1   4    1.30    0.40
  -1  -1  -4 4636.34   51.59
   1  -1   4 4687.33   52.39
  -1  -1  -4 4744.93   51.89
   1  -1   4 4620.04   52.29
  -1  -1  -4 4549.74   51.39
   1   1   4 4775.42   51.79
  -1   1  -4 4709.53   52.99
  -1   1  -4 4581.64   52.89
   1   1   4 4649.23   51.29
  -2  -1  -4 2287.57   28.50
  -2  -1  -4 2310.67   29.80
   2  -1   4 2309.27   29.60
  -2  -1  -4 2324.17   30.30
   2  -1   4 2310.37   30.10
  -2   1  -4 2423.56   31.20
   2   1   4 2346.97   30.10
  -2   1  -4 2305.67   30.70
  -3  -1  -4  826.72   15.80
   3  -1   4  859.11   16.00
  -3  -1  -4  827.22   16.10
  -3  -1  -4  847.82   14.30
   3  -1   4  846.12   15.30
  -3   1  -4  830.02   15.90
  -3   1  -4  809.52   15.50
   3   1   4  816.92   15.20
  -4  -1  -4 1005.10   20.20
   4  -1   4 1013.10   18.90
   4  -1   4  983.90   19.60
  -4  -1  -4 1002.00   17.70
  -4  -1  -4  980.40   19.60
   4   1   4  998.30   19.30
  -4   1  -4 1021.50   20.00
  -4   1  -4 1011.10   19.50
   5  -1   4   10.50    2.90
  -5  -1  -4   11.20    2.90
  -5  -1  -4    9.10    2.80
  -5  -1  -4   12.10    2.90
  -5   1  -4   12.00    3.00
  -5   1  -4    9.40    2.80
   5   1   4   19.80    3.80
  -6  -1  -4   89.69    8.30
  -6  -1  -4   78.19    7.20
  -6  -1  -4   76.49    6.20
   6  -1   4   82.39    7.30
  -6   1  -4   71.99    6.90
  -6   1  -4   76.79    6.50
   6   1   4   86.79    6.60
  -7  -1  -4  377.86   15.10
   7  -1   4  358.86   13.90
  -7  -1  -4  355.56   13.40
  -7  -1  -4  384.46   15.70
  -7   1  -4  351.76   14.00
  -7   1  -4  382.56   15.20
  -8  -1  -4  313.77   14.80
   8  -1   4  305.97   14.10
  -8  -1  -4  271.87   14.90
  -8   1  -4  272.17   13.50
  -8   1  -4  251.17   13.40
  -9  -1  -4   70.19    9.60
  -9   1  -4   67.79    9.50
  -9   1  -4   72.49    9.40
 -10  -1  -4    6.60    5.50
 -10   1  -4   12.90    6.00
 -10  -2   4   -1.00    5.00
 -10  -2   4    1.20    5.50
 -10   2   4    1.10    5.40
 -10   2   4   -0.40    6.50
  -9  -2   4   17.20    5.80
  -9  -2   4   22.40    6.50
  -9   2   4   15.10    5.80
  -9   2   4   28.90    6.70
  -8  -2   4   10.70    4.50
  -8  -2   4   -1.50    3.70
  -8  -2   4    1.60    3.60
  -8   2   4    1.40    3.70
  -8   2   4    4.40    3.90
  -7  -2   4   22.50    5.10
  -7  -2   4   17.40    4.40
  -7  -2   4   10.90    4.10
  -7   2   4   15.70    4.30
  -7   2   4   15.30    4.20
  -6  -2   4  104.69    7.50
  -6  -2   4   97.59    7.50
  -6  -2   4  111.39    7.80
  -6   2   4  101.19    7.70
  -6   2   4   91.19    7.10
  -5  -2   4  145.39    8.00
   5  -2  -4  153.48    6.90
  -5  -2   4  151.88    8.20
  -5  -2   4  136.49    6.00
  -5  -2   4  137.39    8.10
  -5   2   4  136.29    6.10
  -5   2   4  151.58    7.60
  -5   2   4  135.79    8.00
  -4  -2   4  270.97    7.30
   4  -2  -4  292.87    8.30
  -4  -2   4  265.97   10.10
   4  -2  -4  258.17    9.10
  -4  -2   4  270.27    9.50
  -4   2   4  278.57   10.20
  -4   2   4  273.57    9.10
  -4   2   4  256.87    8.00
   3  -2  -4   19.20    2.60
  -3  -2   4   18.30    3.10
   3  -2  -4   16.20    2.10
  -3  -2   4   13.70    2.60
  -3  -2   4   11.70    1.70
  -3   2   4   21.70    2.70
  -3   2   4   23.30    2.70
  -3   2   4   11.40    2.70
   2  -2  -4   37.60    2.00
   2  -2  -4   32.80    2.60
  -2  -2   4   34.40    3.30
  -2  -2   4   33.40    3.30
  -2   2   4   28.30    2.30
  -2   2   4   29.40    2.80
  -2   2   4   37.00    3.10
   1  -2  -4  821.22   12.40
   1  -2  -4  846.02   13.10
  -1  -2   4  798.12   13.70
  -1  -2   4  804.42   14.10
   1   2  -4  829.12   14.10
  -1   2   4  815.42   12.10
  -1   2   4  822.72   13.80
   0  -2  -4 1381.06   18.50
   0  -2  -4 1398.16   17.90
   0  -2   4 1443.66   20.00
   0  -2  -4 1432.26   18.90
   0  -2   4 1394.26   19.40
   0   2  -4 1443.16   18.50
   0   2   4 1418.26   18.40
   0   2  -4 1465.45   20.50
   0   2   4 1440.56   20.20
   1  -2   4  812.92   13.20
  -1  -2  -4  825.02   12.00
   1  -2   4  818.52   13.80
  -1  -2  -4  830.42   13.50
  -1   2  -4  808.42   13.30
  -1   2  -4  804.42   13.80
   2  -2   4   32.10    3.10
  -2  -2  -4   34.60    3.30
   2  -2   4   33.30    2.90
  -2  -2  -4   34.20    2.20
  -2   2  -4   30.80    3.00
  -2   2  -4   33.80    3.20
  -3  -2  -4   16.30    2.20
  -3  -2  -4   18.70    2.80
   3  -2   4   15.40    2.50
  -3  -2  -4   14.40    2.50
   3  -2   4   16.50    2.70
  -3   2  -4   15.50    2.70
  -3   2  -4    9.20    2.20
   4  -2   4  285.27    9.30
  -4  -2  -4  285.07   10.10
  -4  -2  -4  256.57    9.40
   4  -2   4  270.97    9.80
  -4  -2  -4  270.67    7.90
  -4   2  -4  276.77    9.90
  -4   2  -4  284.47   10.30
  -5  -2  -4  137.59    7.90
   5  -2   4  152.18    7.50
  -5  -2  -4  139.49    6.30
  -5  -2  -4  121.59    7.80
   5  -2   4  131.59    7.80
  -5   2  -4  145.99    8.20
  -5   2  -4  146.89    7.90
  -6  -2  -4  105.19    7.80
  -6  -2  -4  108.69    7.60
  -6  -2  -4   99.19    7.80
   6  -2   4   86.79    7.00
  -6   2  -4   99.49    7.50
  -6   2  -4   98.69    7.60
  -7  -2  -4    8.40    4.00
  -7  -2  -4   12.40    4.20
   7  -2   4   19.20    5.10
  -7   2  -4   22.50    5.00
  -7   2  -4   14.90    4.50
  -8  -2  -4    1.30    4.10
  -8  -2  -4    1.00    4.00
   8  -2   4    3.10    4.20
  -8   2  -4   -1.00    4.20
  -8   2  -4    7.70    4.70
  -9  -2  -4   25.40    6.90
   9  -2   4   24.80    6.50
  -9   2  -4   27.60    6.70
 -10  -2  -4    4.70    5.70
 -10   2  -4   12.00    5.70
 -10   2  -4   -2.30    5.80
 -10  -3   4    9.10    6.70
 -10  -3   4   10.40    5.20
 -10   3   4   10.80    7.00
 -10   3   4   19.10    7.30
  -9  -3   4    8.90    5.80
  -9  -3   4   10.10    5.20
  -9   3   4    8.60    5.40
  -8  -3   4   55.79    8.40
  -8  -3   4   36.10    6.70
  -8   3   4   54.39    7.60
  -8   3   4   49.90    7.50
  -7  -3   4  128.49    9.80
  -7  -3   4  126.09    9.50
  -7  -3   4  111.29   10.40
  -7   3   4  146.29   10.20
  -7   3   4  127.19    9.10
  -6  -3   4   12.40    3.90
   6  -3  -4   16.80    3.50
  -6  -3   4   11.70    3.80
  -6  -3   4   17.20    4.00
  -6   3   4   19.80    4.50
  -6   3   4   15.60    3.80
   5  -3  -4   54.19    4.90
  -5  -3   4   46.40    5.40
  -5  -3   4   47.10    5.90
   5  -3  -4   59.49    5.90
  -5   3   4   49.90    5.70
  -5   3   4   55.09    4.90
  -5   3   4   45.50    5.20
   4  -3  -4  227.18    8.90
  -4  -3   4  220.18    9.00
  -4  -3   4  216.48    9.50
   4  -3  -4  218.08    7.20
  -4   3   4  204.48    7.70
  -4   3   4  219.08    9.50
  -4   3   4  218.98    8.50
  -3  -3   4  344.37   11.10
   3  -3  -4  329.87    7.50
  -3  -3   4  331.57   10.40
   3  -3  -4  316.97    9.50
  -3   3   4  332.17   10.80
  -3   3   4  332.37    9.40
  -3   3   4  314.67    9.30
   2  -3  -4   59.59    2.60
   2  -3  -4   59.49    3.80
  -2   3   4   59.09    3.70
   2   3  -4   86.49    4.90
  -2   3   4   57.69    4.20
  -2   3   4   60.19    4.00
  -1  -3   4 1448.26   22.80
  -1  -3   4 1400.76   21.60
   1  -3  -4 1406.36   17.80
   1  -3  -4 1387.36   20.60
  -1   3   4 1449.95   22.50
  -1   3   4 1473.95   20.80
   1   3  -4 1472.55   17.80
   1   3  -4 1460.25   23.00
  -1   3   4 1443.56   22.30
   0  -3   4   23.40    2.80
   0  -3  -4   20.30    2.20
   0  -3  -4   22.70    1.80
   0  -3   4   20.90    2.40
   0   3   4   23.40    2.30
   0   3  -4   17.30    2.50
   0   3  -4   20.80    2.00
  -1  -3  -4 1466.95   20.00
   1  -3   4 1434.46   21.10
   1  -3   4 1427.76   22.30
  -1  -3  -4 1420.16   19.10
  -1  -3  -4 1428.86   21.90
   1   3   4 1461.95   21.70
  -1   3  -4 1478.35   21.70
  -1   3  -4 1514.85   23.30
  -2  -3  -4   53.49    3.50
   2  -3   4   62.09    4.20
  -2  -3  -4   54.29    4.10
  -2  -3  -4   57.69    2.80
   2  -3   4   57.79    3.80
  -2   3  -4   56.29    4.20
   3  -3   4  335.27   10.40
   3  -3   4  331.97    9.40
  -3  -3  -4  317.37    7.20
  -3  -3  -4  339.97   10.60
  -3   3  -4  338.47   10.60
  -3   3  -4  331.57   10.40
  -4  -3  -4  203.78    8.70
  -4  -3  -4  201.88    6.20
   4  -3   4  212.58    8.20
  -4  -3  -4  192.08    9.10
   4  -3   4  222.48    9.20
  -4   3  -4  206.58    9.00
  -4   3  -4  219.08    9.40
  -5  -3  -4   43.00    5.70
   5  -3   4   45.40    5.50
  -5  -3  -4   48.60    5.40
   5  -3   4   47.20    5.20
  -5   3  -4   44.30    5.20
  -5   3  -4   50.99    6.10
  -6  -3  -4   12.60    4.00
   6  -3   4   20.20    4.10
  -6  -3  -4   11.90    3.50
   6  -3   4   17.30    4.10
  -6   3  -4   15.50    4.00
  -6   3  -4   14.80    4.40
   7  -3   4  130.79    9.30
  -7  -3  -4  125.19    9.60
  -7  -3  -4  121.29    9.70
  -7   3  -4  123.19    9.80
  -7   3  -4  122.89    9.40
   8  -3   4   48.90    7.40
  -8  -3  -4   54.89    8.50
  -8   3  -4   46.60    7.40
  -9  -3  -4    0.50    5.10
   9  -3   4   -2.20    4.90
  -9  -3  -4   -1.20    3.90
  -9   3  -4   -1.20    5.30
  10  -3   4    8.40    6.30
 -10  -3  -4   -0.30    6.20
 -10  -3  -4    7.90    5.10
 -10   3  -4    0.00    6.00
  -9  -4   4    3.90    4.20
  -9  -4   4   11.20    5.50
  -9   4   4    5.50    5.40
  -8  -4   4   14.10    5.10
  -8  -4   4    8.30    4.80
  -8   4   4   14.70    5.70
  -8   4   4    9.10    5.10
  -7  -4   4   41.70    6.50
  -7  -4   4   43.50    6.50
  -7  -4   4   58.59    8.20
   7  -4  -4   46.50    6.90
  -7   4   4   43.60    7.10
  -7   4   4   48.00    6.80
  -6  -4   4   59.29    7.40
  -6  -4   4   85.79    8.20
  -6  -4   4   67.79    7.40
   6  -4  -4   70.39    7.50
  -6   4   4   59.59    6.60
  -6   4   4   77.79    8.00
   5  -4  -4   28.40    3.80
  -5  -4   4   28.90    5.20
  -5  -4   4   28.00    4.80
   5  -4  -4   32.30    4.80
  -5   4   4   31.10    5.20
  -5   4   4   23.30    4.20
  -5   4   4   29.90    4.20
  -4  -4   4    3.40    2.70
   4  -4  -4    3.80    1.80
  -4  -4   4    6.10    2.40
   4  -4  -4    3.30    2.40
  -4   4   4    2.40    2.00
  -4   4   4    1.20    1.90
  -4   4   4    2.60    2.60
   3  -4  -4  228.68    6.30
   3  -4  -4  219.18    8.50
  -3  -4   4  216.88    9.50
  -3  -4   4  220.78    8.80
  -3   4   4  226.08    8.60
  -3   4   4  237.78    9.60
  -3   4   4  236.58    8.60
   2  -4  -4   18.60    3.10
  -2  -4   4   26.10    4.00
   2  -4  -4   20.80    2.10
  -2  -4   4   21.40    3.10
  -2   4   4   26.20    3.10
  -2   4   4   21.90    3.30
   2   4  -4   22.70    3.40
  -2   4   4   19.80    3.40
   1  -4  -4  324.47    9.10
  -1  -4   4  331.67   10.50
   1  -4  -4  323.27    6.40
  -1  -4   4  330.17    9.50
  -1   4   4  332.27    9.50
   1   4  -4  338.07    6.50
   1   4  -4  325.37   10.00
  -1   4   4  339.97    9.10
   0  -4  -4 1057.39   15.50
   0  -4   4 1066.09   18.20
   0  -4  -4 1063.49   18.60
   0  -4   4 1070.59   19.70
   0   4  -4 1085.09   16.60
   0   4  -4 1105.19   20.20
   0   4   4 1053.49   17.60
   0   4   4 1096.79   18.50
   1  -4   4  332.87   10.00
   1  -4   4  341.77    8.90
  -1  -4  -4  339.27    8.30
  -1  -4  -4  323.47    9.80
  -1   4  -4  320.07    9.90
  -1   4  -4  340.97    9.10
   1   4   4  321.87    9.30
   2  -4   4   25.00    3.40
  -2  -4  -4   21.30    3.50
  -2  -4  -4   24.10    2.20
  -2  -4  -4   24.40    3.20
   2  -4   4   17.60    2.80
  -2   4  -4   24.00    3.40
  -2   4  -4   22.00    3.40
  -3  -4  -4  217.18    9.40
   3  -4   4  213.88    8.80
  -3  -4  -4  228.18    5.60
   3  -4   4  227.88    8.20
  -3  -4  -4  218.78    8.40
  -3   4  -4  228.88    9.20
  -3   4  -4  225.78    9.10
  -4  -4  -4    1.60    2.30
   4  -4   4    0.90    2.30
   4  -4   4    2.20    1.80
  -4  -4  -4    3.70    2.40
  -4   4  -4    2.80    2.80
  -4   4  -4    1.20    1.90
  -5  -4  -4   30.40    4.80
  -5  -4  -4   23.00    4.00
   5  -4   4   37.90    5.30
  -5  -4  -4   22.10    4.70
   5  -4   4   22.70    3.90
  -5   4  -4   29.90    5.00
  -5   4  -4   27.30    4.70
   6  -4   4   57.19    6.50
  -6  -4  -4   71.29    7.60
   6  -4   4   65.79    7.50
  -6  -4  -4   65.09    7.30
  -6  -4  -4   75.89    8.30
  -6   4  -4   68.79    7.70
  -6   4  -4   70.59    7.70
  -7  -4  -4   59.99    7.70
  -7  -4  -4   49.40    7.00
   7  -4   4   48.30    6.60
  -7  -4  -4   62.59    8.40
   7  -4   4   45.80    6.90
  -7   4  -4   38.50    6.20
  -7   4  -4   48.00    7.20
  -8  -4  -4   10.10    5.70
  -8  -4  -4    9.40    4.70
   8  -4   4   12.50    5.00
  -8   4  -4   16.60    5.50
  -9  -4  -4    2.30    5.20
   9  -4   4    6.20    5.30
  -9  -4  -4    1.40    5.60
  -9   4  -4   -2.60    4.90
  -9  -5   4   25.50    7.20
  -9  -5   4   19.50    7.40
  -9   5   4   19.70    7.00
  -8  -5   4   -0.40    3.90
  -8  -5   4   -2.30    4.40
  -8   5   4    1.50    4.60
  -7  -5   4   91.39    9.90
   7  -5  -4   98.79    9.80
  -7  -5   4   87.19   10.20
  -7   5   4   75.39    8.90
  -7   5   4   88.19    8.90
  -6  -5   4    4.10    4.20
  -6  -5   4    9.00    4.30
   6  -5  -4   12.30    4.50
  -6   5   4    6.50    4.30
  -6   5   4   19.90    4.80
  -5  -5   4   -0.90    2.90
   5  -5  -4    2.70    2.80
  -5  -5   4    2.90    2.90
  -5   5   4    1.00    3.30
  -5   5   4   -1.30    2.50
   4  -5  -4  132.99    7.80
  -4  -5   4  126.39    8.00
  -4  -5   4  121.09    8.30
  -4   5   4  121.59    8.30
  -4   5   4  143.79    8.00
   3  -5  -4   54.19    4.50
  -3  -5   4   43.70    5.10
   3  -5  -4   50.09    5.30
  -3  -5   4   55.19    6.20
   3   5  -4   49.10    5.70
  -3   5   4   47.10    5.40
  -3   5   4   55.89    5.20
  -2  -5   4  188.68    8.40
   2  -5  -4  212.78    5.90
   2  -5  -4  210.98    8.50
  -2  -5   4  203.58    9.70
  -2   5   4  216.38    9.00
   2   5  -4  208.18    9.30
  -2   5   4  199.58    8.20
   1  -5  -4    0.40    1.80
  -1  -5   4    2.00    1.90
  -1  -5   4   -2.00    1.80
   1  -5  -4    3.90    1.50
   1   5  -4    2.20    2.10
  -1   5   4   -1.00    1.70
   1   5  -4   -3.20    1.40
  -1   5   4   -1.30    1.70
   0  -5   4    4.10    1.80
   0  -5   4    2.50    2.10
   0  -5  -4    6.60    2.40
   0  -5  -4    5.90    1.60
   0   5  -4    2.10    2.20
   0   5   4    5.10    1.90
   0   5  -4    4.20    1.90
   0   5   4    3.40    1.80
   1  -5   4    1.60    2.00
  -1  -5  -4    4.50    2.30
   1  -5   4    2.50    1.70
  -1  -5  -4    0.30    1.50
   1   5   4    1.30    1.90
  -1   5  -4    3.50    1.90
  -1   5  -4    4.00    2.30
   1   5   4    4.80    1.80
  -2  -5  -4  219.08    8.10
  -2  -5  -4  205.48    9.30
   2  -5   4  209.68    9.20
   2  -5   4  218.48    8.00
  -2   5  -4  217.38    8.80
  -2   5  -4  210.48    9.10
   2   5   4  204.68    8.60
  -3  -5  -4   51.59    5.20
   3  -5   4   54.99    5.80
   3  -5   4   55.59    4.90
  -3  -5  -4   42.20    5.40
  -3   5  -4   59.39    6.00
  -3   5  -4   51.29    5.60
  -4  -5  -4  114.99    8.40
   4  -5   4  129.59    7.00
  -4  -5  -4  136.39    7.70
   4  -5   4  126.99    8.00
  -4   5  -4  138.19    8.70
  -4   5  -4  127.49    8.00
   5  -5   4   -0.50    2.40
  -5  -5  -4    3.70    2.80
  -5  -5  -4    2.90    3.30
   5  -5   4    1.20    3.20
  -5   5  -4    1.40    2.80
  -5   5  -4   -0.70    3.10
   6  -5   4   20.70    4.60
  -6  -5  -4   16.40    4.60
  -6  -5  -4   15.80    4.60
   6  -5   4   18.70    4.90
  -6  -5  -4   15.10    4.90
  -6   5  -4   13.80    4.30
  -6   5  -4    0.20    4.10
   7  -5   4   76.99    9.40
  -7  -5  -4   80.99    8.90
   7  -5   4   94.59    8.90
  -7  -5  -4   84.29    9.20
  -7  -5  -4   92.19   10.10
  -7   5  -4   78.39    9.40
  -7   5  -4   89.79    9.80
   8  -5   4    4.20    4.80
  -8  -5  -4    1.70    4.90
   8  -5   4    5.40    4.80
  -8  -5  -4    2.10    4.60
  -8   5  -4    0.20    4.70
  -9  -5  -4   35.10    8.30
  -9  -5  -4   33.20    8.50
  -9   5  -4   29.80    7.80
   8  -6  -4    0.20    4.90
  -8  -6   4    0.00    5.10
  -8  -6   4    1.80    4.80
  -8   6   4   -2.20    4.80
   7  -6  -4   20.30    6.00
  -7  -6   4   22.00    6.80
  -7  -6   4   23.00    6.40
  -7   6   4   21.70    5.90
  -7   6   4   25.40    6.50
   6  -6  -4  163.88   11.10
  -6  -6   4  157.28   11.90
  -6  -6   4  173.88   11.40
  -6   6   4  149.69   10.30
  -6   6   4  175.88   11.60
   5  -6  -4  261.87   12.40
  -5  -6   4  258.57   12.50
  -5  -6   4  273.17   13.80
  -5   6   4  256.37   12.00
  -5   6   4  245.48   12.80
  -4  -6   4   98.89    9.10
  -4  -6   4   99.79    7.90
   4  -6  -4   87.29    7.30
  -4   6   4   92.29    7.70
  -4   6   4   98.89    7.60
  -3  -6   4   21.60    4.70
   3  -6  -4   17.70    3.80
  -3  -6   4   18.60    4.00
  -3   6   4   20.30    3.80
  -3   6   4   29.70    5.00
   3   6  -4   12.50    3.50
  -2  -6   4    2.90    2.50
  -2  -6   4    7.30    2.70
   2  -6  -4    6.30    2.60
   2   6  -4    7.50    3.30
  -2   6   4    4.40    2.40
  -2   6   4    6.50    2.90
  -1  -6   4   69.59    6.60
   1  -6  -4   62.69    5.30
  -1  -6   4   66.19    5.30
   1  -6  -4   62.09    5.80
   1   6  -4   63.49    6.40
  -1   6   4   78.29    5.80
  -1   6   4   54.99    5.40
   0  -6  -4   39.90    4.80
   0  -6   4   51.49    5.60
   0  -6   4   60.99    4.90
   0  -6  -4   44.80    3.80
   0   6  -4   50.79    5.70
   0   6   4   47.20    5.00
   0   6  -4   52.69    4.20
   0   6   4   48.90    4.60
   1  -6   4   68.49    4.90
  -1  -6  -4   66.79    4.70
  -1  -6  -4   70.59    5.90
   1  -6   4   67.19    6.40
   1   6   4   70.79    4.50
  -1   6  -4   59.29    5.30
   1   6   4   71.29    5.90
  -1   6  -4   69.89    6.50
   2  -6   4    3.20    2.80
  -2  -6  -4    5.10    2.70
  -2  -6  -4    8.20    2.70
   2  -6   4    7.80    2.70
  -2   6  -4    3.90    2.30
  -2   6  -4    4.60    2.80
   2   6   4    6.00    2.80
  -3  -6  -4   21.20    4.80
   3  -6   4   19.60    4.20
  -3  -6  -4   22.10    4.10
   3  -6   4   24.80    3.90
  -3   6  -4   27.90    4.80
  -3   6  -4   24.80    4.40
  -4  -6  -4   96.19    7.30
   4  -6   4   88.29    8.20
   4  -6   4   93.99    6.60
  -4  -6  -4   95.19    8.90
  -4   6  -4   86.79    8.10
  -4   6  -4   90.39    7.50
   5  -6   4  257.27   10.80
  -5  -6  -4  261.77   13.80
   5  -6   4  264.77   12.90
  -5  -6  -4  246.48   11.70
  -5   6  -4  224.38   12.00
  -5   6  -4  250.87   13.00
   6  -6   4  159.58    9.80
  -6  -6  -4  160.18   10.30
  -6  -6  -4  140.69   11.60
   6  -6   4  156.68   11.00
  -6  -6  -4  159.48   11.20
  -6   6  -4  159.98   11.70
  -6   6  -4  158.08   11.10
   7  -6   4   26.40    6.30
  -7  -6  -4   14.40    6.40
  -7  -6  -4   13.60    5.30
  -7   6  -4   22.40    6.70
  -8  -6  -4    2.50    4.10
  -8  -6  -4   -0.20    5.40
   8  -6   4    8.10    5.70
  -8   6  -4   -4.50    5.10
   8  -7  -4    5.60    5.80
  -8  -7   4    8.80    6.60
  -8  -7   4    9.50    6.20
  -8   7   4   11.30    6.80
  -7  -7   4   21.30    6.30
  -7  -7   4    9.50    6.00
   7  -7  -4    7.90    5.40
  -7   7   4    9.70    5.90
  -6  -7   4   40.10    7.00
   6  -7  -4   53.59    8.00
  -6  -7   4   36.40    7.10
  -6   7   4   53.59    7.60
  -6   7   4   45.20    7.50
  -5  -7   4   45.70    6.80
   5  -7  -4   60.99    7.60
  -5  -7   4   46.00    7.60
  -5   7   4   64.29    8.30
  -5   7   4   51.89    6.90
   4  -7  -4   13.30    4.10
  -4  -7   4    9.80    3.70
  -4   7   4   10.80    4.00
  -4   7   4   11.70    4.60
  -3  -7   4  127.19    9.70
  -3  -7   4  130.89    8.70
   3  -7  -4  128.39    8.80
  -3   7   4  127.99    8.80
  -3   7   4  103.29    8.00
   3   7  -4  128.99    9.40
  -2  -7   4   27.50    4.70
  -2  -7   4   27.70    5.40
   2  -7  -4   31.00    5.00
   2   7  -4   19.70    4.50
  -2   7   4   32.90    5.00
  -2   7   4   21.90    4.60
  -1  -7   4   48.30    6.40
   1  -7  -4   28.70    4.70
  -1  -7   4   44.90    5.30
   1   7  -4   30.00    5.10
  -1   7   4   34.70    4.90
  -1   7   4   37.20    5.00
   0  -7  -4    0.10    2.30
   0  -7   4    2.00    2.30
   0  -7   4    1.00    2.50
   0   7   4   -0.30    2.70
   0   7   4   -1.50    2.20
   0   7  -4    2.00    2.30
  -1  -7  -4   46.00    5.90
   1  -7   4   37.90    5.50
   1  -7   4   41.20    4.60
  -1  -7  -4   39.80    4.50
  -1   7  -4   35.90    4.60
  -1   7  -4   38.80    5.80
   1   7   4   38.70    5.30
  -2  -7  -4   27.20    4.90
  -2  -7  -4   22.10    4.10
   2  -7   4   22.10    4.60
   2  -7   4   27.40    4.20
  -2   7  -4   27.30    5.10
   2   7   4   27.00    4.70
  -2   7  -4   29.30    4.80
  -3  -7  -4  114.29    7.70
  -3  -7  -4   98.59    9.20
   3  -7   4  131.69    7.60
   3  -7   4  126.49    8.90
  -3   7  -4  110.09    8.50
  -3   7  -4  116.69    8.50
   4  -7   4    8.40    4.10
  -4  -7  -4   14.90    4.90
  -4  -7  -4   12.40    3.90
   4  -7   4   10.80    3.90
  -4   7  -4    8.50    4.10
  -4   7  -4   11.10    4.50
  -5  -7  -4   49.40    7.80
   5  -7   4   65.59    7.80
  -5  -7  -4   47.80    6.80
  -5   7  -4   70.49    8.30
  -5   7  -4   68.09    8.50
   6  -7   4   51.29    7.90
  -6  -7  -4   38.80    7.70
  -6  -7  -4   41.90    6.90
  -6   7  -4   53.79    8.40
   7  -7   4   12.90    5.90
  -7  -7  -4   10.90    6.50
  -7  -7  -4   12.50    5.60
  -7   7  -4   22.70    6.70
  -8  -7  -4   14.00    6.80
  -8  -7  -4    1.40    5.50
   8  -7   4    5.40    5.90
  -8   7  -4   14.10    6.80
  -7  -8   4   32.50    7.20
  -7  -8   4   33.00    8.00
   7  -8  -4   34.40    7.70
  -7   8   4   32.40    8.30
  -6  -8   4   84.09   10.10
  -6  -8   4   75.89   10.60
   6  -8  -4   65.29    9.10
  -6   8   4   79.69   10.20
  -5  -8   4  224.48   13.00
  -5  -8   4  212.68   14.30
   5  -8  -4  228.98   13.00
  -5   8   4  230.18   13.10
  -5   8   4  224.58   13.60
  -4  -8   4   33.10    5.80
   4  -8  -4   41.90    6.60
  -4  -8   4   44.90    7.70
  -4   8   4   33.30    6.10
  -4   8   4   42.90    6.70
  -3  -8   4   48.00    6.40
  -3  -8   4   34.90    6.70
   3  -8  -4   45.30    6.50
  -3   8   4   34.40    5.80
  -3   8   4   38.50    6.20
   3   8  -4   39.30    6.70
   2  -8  -4    9.10    4.20
  -2  -8   4   10.10    3.70
  -2  -8   4   -1.90    3.70
  -2   8   4    6.20    3.80
   2   8  -4   21.00    5.00
  -2   8   4   11.70    4.40
  -1  -8   4   -1.70    2.70
  -1  -8   4   -2.40    3.20
   1  -8  -4   -1.00    2.70
  -1   8   4    3.20    3.40
   1   8  -4   -4.00    3.10
   0  -8   4  239.68   10.10
   0  -8  -4  215.18   11.10
   0  -8   4  222.98   11.70
   0   8  -4  277.47   13.10
   0   8   4  253.57   11.90
  -1  -8  -4    4.30    3.40
   1  -8   4   -1.00    2.80
   1  -8   4   -1.90    2.40
  -1   8  -4    3.00    3.40
   1   8   4    5.30    3.70
   2  -8   4    8.90    3.70
  -2  -8  -4    3.20    3.40
   2  -8   4   10.40    4.20
  -2   8  -4   13.00    4.00
   2   8   4   14.50    4.40
  -2   8  -4   16.50    4.60
  -3  -8  -4   34.10    6.50
   3  -8   4   42.90    6.70
  -3  -8  -4   31.20    5.20
  -3   8  -4   45.30    6.50
  -3   8  -4   32.20    6.00
  -4  -8  -4   27.20    5.40
   4  -8   4   30.10    6.20
  -4  -8  -4   27.20    6.60
  -4   8  -4   45.30    7.00
  -4   8  -4   27.80    6.10
   5  -8   4  211.98   13.40
  -5  -8  -4  235.08   15.20
  -5  -8  -4  214.38   12.60
  -5   8  -4  237.18   14.10
  -6  -8  -4   74.29   10.40
  -6  -8  -4   67.89    9.20
   6  -8   4   70.89    9.60
  -6   8  -4   75.79    9.90
  -7  -8  -4   27.30    7.30
   7  -8   4   17.60    5.80
  -7  -8  -4   28.80    7.70
  -7   8  -4   30.10    8.00
  -6  -9   4   -2.20    5.00
  -6  -9   4    7.80    5.60
   6  -9  -4    1.70    5.30
  -6   9   4    1.20    5.80
  -5  -9   4   20.70    6.70
   5  -9  -4   29.60    6.70
  -5  -9   4   33.60    7.20
  -5   9   4   27.90    7.20
  -4  -9   4    9.60    5.00
   4  -9  -4   14.40    5.80
  -4  -9   4    6.00    5.10
  -4   9   4   11.50    5.20
  -3  -9   4   32.80    6.10
  -3  -9   4   40.90    7.20
   3  -9  -4   36.70    6.50
  -3   9   4   48.90    7.30
  -3   9   4   42.70    6.70
  -2  -9   4   13.50    4.60
   2  -9  -4   21.90    5.50
  -2  -9   4   10.60    5.00
   2   9  -4    6.50    4.40
  -2   9   4    8.90    4.70
  -1  -9   4  181.38   11.70
  -1  -9   4  149.29    9.10
   1  -9  -4  173.88   11.00
  -1   9   4  173.38   11.60
   1   9  -4  164.18   11.70
   0  -9  -4   11.10    4.30
   0  -9   4   16.60    4.10
   0  -9   4   15.10    4.90
   0   9   4    9.70    4.60
   0   9  -4   13.50    4.70
   1  -9   4  130.29   10.40
  -1  -9  -4  166.78   11.20
  -1   9  -4  145.59   11.30
   1   9   4  153.18   10.70
   2  -9   4   10.90    4.40
  -2  -9  -4    9.40    4.30
   2   9   4   14.80    5.10
  -2   9  -4   17.10    5.50
  -3  -9  -4   44.90    7.70
   3  -9   4   33.10    6.20
  -3   9  -4   48.50    8.80
  -3   9  -4   34.70    6.50
   4  -9   4   16.80    6.00
  -4  -9  -4   19.50    6.40
  -4   9  -4   20.80    6.00
   5  -9   4   21.20    6.60
  -5  -9  -4   26.90    7.40
  -5   9  -4   31.30    7.40
   6  -9   4    3.50    5.80
  -6  -9  -4    4.70    5.10
  -6  -9  -4    1.10    5.70
  -6   9  -4    2.30    5.70
  -5 -10   4   17.10    6.20
  -5 -10   4   10.40    6.40
   5 -10  -4   16.50    7.00
  -5  10   4    7.00    6.20
  -4 -10   4    1.40    5.70
  -4 -10   4   -1.20    4.50
   4 -10  -4   -3.50    5.10
  -4  10   4    2.00    5.90
  -3 -10   4   30.70    7.60
   3 -10  -4   22.70    6.00
  -3 -10   4   26.50    5.90
   2 -10  -4   18.40    5.80
  -2 -10   4   15.70    5.90
  -2 -10   4   12.30    4.60
   1 -10  -4   -2.60    3.80
  -1 -10   4   -1.00    3.70
  -1  10   4    2.70    5.00
   0 -10   4  116.89   11.40
   0 -10  -4   76.99    9.00
   0  10   4   86.79    9.70
   1 -10   4    4.30    4.80
  -1 -10  -4   -0.40    3.90
   1  10   4    1.60    5.60
  -2 -10  -4   13.80    5.50
   2 -10   4    9.50    5.30
   3 -10   4   28.50    6.90
  -3 -10  -4   24.50    6.60
  -4 -10  -4    2.20    5.70
   4 -10   4  -13.50    4.40
  -5 -10  -4   16.20    6.60
   5 -10   4   21.00    7.20
  -5  10  -4    8.30    6.40
  -3 -11   4    4.60    4.80
   3 -11  -4   -1.20    5.20
  -2 -11   4    4.10    5.30
   2 -11  -4   -6.70    4.60
  -1 -11   4   29.50    7.50
   1 -11  -4   21.00    7.20
   0 -11   4    1.30    4.90
   0 -11  -4   -0.60    4.90
   1 -11   4   19.00    6.50
  -1 -11  -4   28.30    7.00
  -2 -11  -4   -0.90    5.30
   2 -11   4    7.30    6.00
  -3 -11  -4    2.40    5.50
   3 -11   4   -0.70    5.30
 -10   0   5    3.50    5.50
 -10   0   5   12.80    6.20
  -9   0   5    2.70    5.00
  -9   0   5    1.10    4.10
  -8   0   5    1.60    3.80
  -8   0   5    5.50    3.90
  -8   0   5    2.50    3.80
  -7   0   5   32.00    5.40
  -7   0   5   16.80    4.70
  -7   0   5   20.00    4.60
  -6   0   5    1.70    2.50
  -6   0   5   -0.40    2.30
  -6   0   5    5.80    2.70
  -5   0   5   -2.10    1.80
  -5   0   5   -0.70    1.70
  -5   0   5   -0.30    1.70
  -5   0   5   -2.60    1.40
  -4   0   5    0.20    1.40
  -4   0   5    1.50    1.50
  -4   0   5   -0.90    1.60
  -4   0   5   -0.30    1.70
  -3   0   5    0.20    1.30
  -3   0   5   -0.40    1.10
  -3   0   5    0.00    1.10
  -3   0   5   -0.60    1.10
  -3   0   5   -0.40    1.00
  -2   0   5   10.30    1.50
  -2   0   5   11.00    1.60
  -2   0   5    7.40    1.40
  -2   0   5   10.30    1.70
  -1   0   5    0.00    0.80
  -1   0   5    0.60    0.60
  -1   0   5    3.40    0.80
   1   0  -5    1.20    1.00
   0   0   5    0.20    0.60
   0   0   5    1.00    0.60
   0   0  -5   -1.10    0.40
   0   0   5   -0.50    0.40
   0   0  -5   -0.80    0.70
  -1   0  -5    2.50    0.80
   1   0   5    0.60    0.70
   1   0   5    3.10    0.90
   1   0   5    0.60    0.90
  -1   0  -5    0.00    1.00
  -2   0  -5   11.90    1.80
  -2   0  -5   11.20    1.70
   2   0   5   14.20    1.90
  -3   0  -5    1.10    1.10
  -3   0  -5   -0.20    1.40
   3   0   5    0.60    1.30
  -4   0  -5    0.20    1.60
   4   0   5   -2.70    1.80
  -4   0  -5    0.20    2.00
   5   0   5    1.70    2.20
  -5   0  -5   -1.50    1.90
  -5   0  -5   -1.10    1.40
  -6   0  -5    2.60    2.20
  -6   0  -5    2.10    2.70
   6   0   5   -6.20    2.10
  -7   0  -5   22.60    5.20
  -7   0  -5   18.10    4.60
  -7   0  -5   26.00    5.20
   7   0   5   20.00    5.10
   8   0   5    3.90    4.30
  -8   0  -5    0.60    3.90
  -8   0  -5   -0.80    3.90
  -8   0  -5    3.30    3.30
  -9   0  -5   -1.70    4.40
 -10   0  -5    1.50    5.70
 -10  -1   5   52.09    8.90
 -10  -1   5   61.89    9.30
 -10   1   5   36.80    7.40
 -10   1   5   41.10    8.60
  -9  -1   5  141.29   11.30
  -9  -1   5  110.49   11.60
  -9   1   5  122.59   11.80
  -8  -1   5   62.79    8.50
  -8  -1   5   66.69    8.40
  -8  -1   5   66.79    8.20
  -8   1   5   46.00    6.70
  -8   1   5   52.79    7.50
  -8   1   5   49.00    7.20
  -7  -1   5  349.67   14.80
  -7  -1   5  350.96   14.20
  -7  -1   5  347.07   13.70
  -7   1   5  326.57   14.20
  -7   1   5  345.87   13.70
  -7   1   5  340.77   14.00
  -6  -1   5   34.80    5.10
  -6  -1   5   48.10    6.00
  -6  -1   5   34.80    4.50
  -6  -1   5   43.10    5.50
  -6   1   5   39.70    5.20
  -6   1   5   30.20    4.80
  -5  -1   5   68.19    5.10
  -5  -1   5   69.19    5.60
  -5  -1   5   80.39    6.10
  -5  -1   5   63.89    4.50
  -5  -1   5   68.29    5.50
  -5   1   5   56.39    5.30
  -5   1   5   62.99    4.30
  -5   1   5   59.39    5.70
  -4  -1   5  447.76   11.90
  -4  -1   5  423.56   12.20
  -4  -1   5  442.66   12.10
  -4  -1   5  430.26   10.60
  -4   1   5  427.86   10.20
  -4   1   5  429.76   11.40
  -4   1   5  427.36   12.00
  -3  -1   5  528.85   10.50
  -3  -1   5  519.25   12.00
  -3  -1   5  513.65   11.60
  -3   1   5  518.15   10.80
  -3   1   5  509.65   12.00
  -3   1   5  536.05   11.20
  -2  -1   5   -0.50    0.90
  -2  -1   5    0.90    1.00
   2  -1  -5    1.00    0.80
  -2   1   5   -1.20    0.80
  -2   1   5    0.60    0.80
  -2   1   5    0.60    1.00
  -1  -1   5  755.32   11.80
  -1  -1   5  769.32   12.30
   1  -1  -5  741.63    9.90
   1   1  -5  757.12   10.90
   1   1  -5  773.12   11.90
  -1   1   5  738.73    9.80
  -1   1   5  716.93   12.00
   0  -1   5    4.10    1.00
   0  -1  -5    4.70    1.10
   0  -1   5    4.70    1.00
   0  -1  -5    3.40    0.50
   0  -1   5    2.70    0.90
   0   1  -5    4.70    1.00
   0   1   5    3.60    1.00
   0   1  -5    4.00    1.10
  -1  -1  -5  732.03   11.50
   1  -1   5  743.73   11.70
  -1  -1  -5  744.83   10.90
   1  -1   5  751.62   12.00
  -1  -1  -5  748.63   11.20
  -1   1  -5  746.93   12.20
  -1   1  -5  760.32   12.10
   1   1   5  732.33   10.90
   1   1   5  747.63   11.00
   2  -1   5    0.80    1.20
   2  -1   5   -0.30    0.90
  -2  -1  -5    1.20    1.10
  -2  -1  -5   -0.90    0.80
  -2  -1  -5   -0.20    0.90
  -2   1  -5   -0.70    0.80
  -2   1  -5   -0.60    1.10
   2   1   5    0.90    0.90
   3  -1   5  539.95   12.20
   3  -1   5  511.75   11.50
  -3  -1  -5  525.95   12.30
  -3  -1  -5  535.05   12.00
  -3  -1  -5  529.15   10.90
  -3   1  -5  545.55   12.50
   3   1   5  529.85   11.80
  -3   1  -5  545.15   12.40
  -4  -1  -5  402.36   10.50
   4  -1   5  434.66   11.50
   4  -1   5  430.66   12.10
  -4  -1  -5  434.76   12.60
  -4  -1  -5  414.26   11.80
  -4   1  -5  441.66   12.30
   4   1   5  443.96   11.80
  -4   1  -5  431.46   12.10
  -5  -1  -5   65.29    6.20
  -5  -1  -5   66.29    5.10
  -5  -1  -5   63.99    6.10
   5  -1   5   75.09    5.50
  -5   1  -5   56.49    5.50
  -5   1  -5   75.39    6.00
   5   1   5   67.79    6.10
  -6  -1  -5   36.10    5.50
  -6  -1  -5   32.80    5.20
  -6  -1  -5   42.50    4.90
   6  -1   5   39.00    5.40
   6   1   5   32.60    5.00
  -6   1  -5   40.80    5.40
  -6   1  -5   46.50    5.90
  -7  -1  -5  319.67   14.50
   7  -1   5  331.17   13.50
  -7  -1  -5  368.16   13.40
  -7  -1  -5  341.97   14.50
  -7   1  -5  349.17   14.50
  -7   1  -5  314.27   13.50
   8  -1   5   55.69    7.60
  -8  -1  -5   52.29    8.00
  -8  -1  -5   56.89    7.50
  -8   1  -5   55.19    7.80
  -8   1  -5   51.49    7.60
   9  -1   5  104.19   10.80
  -9  -1  -5  122.09   12.20
  -9   1  -5  113.89   11.80
  -9   1  -5  117.99   11.20
 -10  -1  -5   58.19   10.00
 -10   1  -5   64.69   10.00
 -10  -2   5    2.40    5.40
 -10  -2   5   10.40    6.70
 -10   2   5    3.30    6.00
  -9  -2   5   91.69   10.90
  -9  -2   5   79.29    9.30
  -9   2   5   84.99   10.40
  -9   2   5   92.89   10.50
  -8  -2   5   -1.20    3.20
  -8  -2   5    8.00    3.90
  -8  -2   5   -1.40    3.80
  -8   2   5   -0.30    3.60
  -8   2   5   -0.50    3.80
  -7  -2   5   -2.20    2.80
  -7  -2   5    0.20    3.00
  -7  -2   5    0.30    3.30
  -7   2   5    3.40    3.20
  -7   2   5   -2.00    3.20
  -6  -2   5   22.40    4.30
  -6  -2   5   30.90    5.00
  -6  -2   5   14.40    3.70
  -6   2   5   20.10    4.30
  -6   2   5   17.00    3.70
  -5  -2   5    2.70    2.30
  -5  -2   5    3.50    2.30
  -5  -2   5    1.50    1.90
  -5  -2   5    0.80    1.90
  -5   2   5    2.80    2.70
  -5   2   5    2.80    1.90
  -5   2   5    2.70    1.80
  -4  -2   5  276.57    7.60
  -4  -2   5  259.97    9.50
  -4  -2   5  269.17   10.20
   4  -2  -5  281.17    9.30
  -4   2   5  280.67    8.70
  -4   2   5  293.17   10.40
  -4   2   5  263.47    9.10
  -3  -2   5  246.68    8.30
  -3  -2   5  250.67    8.70
  -3  -2   5  241.68    6.00
   3  -2  -5  239.18    7.60
   3  -2  -5  246.28    6.40
  -3   2   5  239.28    8.60
  -3   2   5  236.08    7.50
  -3   2   5  248.18    7.40
  -2  -2   5  145.99    5.60
   2  -2  -5  146.59    3.70
  -2  -2   5  136.39    5.70
   2  -2  -5  137.89    4.90
   2   2  -5  146.69    5.80
  -2   2   5  131.79    5.60
  -2   2   5  146.59    5.40
  -2   2   5  154.98    4.90
   1  -2  -5 1075.59   15.10
  -1  -2   5 1109.59   17.50
  -1  -2   5 1071.69   17.00
   1  -2  -5 1097.99   14.70
  -1   2   5 1092.09   17.20
   1   2  -5 1105.89   17.40
  -1   2   5 1102.19   14.80
   1   2  -5 1091.49   14.30
   0  -2  -5 1494.45   20.10
   0  -2   5 1434.56   20.30
   0  -2  -5 1456.85   18.90
   0  -2   5 1476.35   20.70
   0  -2  -5 1463.05   18.30
   0   2  -5 1495.95   21.20
   0   2  -5 1479.75   19.50
   0   2   5 1514.25   21.20
   0   2   5 1491.85   18.70
  -1  -2  -5 1121.99   16.50
  -1  -2  -5 1114.89   15.80
   1  -2   5 1099.29   17.20
   1  -2   5 1087.29   16.70
   1   2   5 1108.09   16.40
  -1   2  -5 1085.99   17.20
  -1   2  -5 1091.49   16.80
   2  -2   5  149.09    5.70
   2  -2   5  134.19    5.10
  -2  -2  -5  142.59    5.60
  -2  -2  -5  139.89    4.50
  -2   2  -5  144.69    5.70
  -2   2  -5  143.09    5.70
   2   2   5  146.09    5.10
   3  -2   5  248.68    7.90
   3  -2   5  262.07    8.70
  -3  -2  -5  245.38    8.10
  -3  -2  -5  249.38    6.80
  -3  -2  -5  240.08    8.40
  -3   2  -5  235.08    8.30
  -3   2  -5  233.58    8.20
   3   2   5  229.58    7.70
   4  -2   5  296.77   10.30
  -4  -2  -5  277.07    8.10
  -4  -2  -5  271.97   10.10
   4  -2   5  292.27    9.50
  -4  -2  -5  292.17   10.00
  -4   2  -5  268.67    9.80
  -4   2  -5  271.47   10.00
  -5  -2  -5    3.90    2.00
  -5  -2  -5    1.10    2.30
  -5  -2  -5   -0.40    2.10
   5  -2   5    3.90    2.70
   5  -2   5   -0.30    2.00
  -5   2  -5    3.60    2.70
  -5   2  -5    0.20    1.90
   6  -2   5   16.70    4.10
  -6  -2  -5   13.80    3.50
  -6  -2  -5   21.60    4.40
  -6  -2  -5   22.00    4.50
  -6   2  -5   18.10    4.20
  -6   2  -5   23.60    4.60
  -7  -2  -5    0.60    3.20
  -7  -2  -5    2.90    3.50
   7  -2   5    4.20    3.10
  -7   2  -5    0.40    2.70
  -7   2  -5    1.70    3.60
  -8  -2  -5    0.90    4.10
   8  -2   5    3.00    4.10
  -8   2  -5    0.50    4.20
  -9  -2  -5   81.59   10.40
   9  -2   5   88.99   10.00
  -9   2  -5   84.69   10.00
 -10  -2  -5    6.50    6.20
 -10   2  -5    2.40    6.20
 -10   2  -5    8.70    6.00
 -10  -3   5  113.39   12.50
 -10  -3   5  112.19   13.20
 -10   3   5  114.39   12.40
 -10   3   5  104.79   12.50
  -9  -3   5   29.80    7.80
  -9  -3   5   28.40    6.60
  -9   3   5   38.70    7.60
  -8  -3   5  227.88   12.80
  -8  -3   5  233.38   14.20
  -8   3   5  237.08   13.60
  -8   3   5  241.68   13.40
  -7  -3   5  167.68   10.80
  -7  -3   5  168.08   11.40
  -7  -3   5  184.38   10.70
  -7   3   5  144.89   10.40
  -7   3   5  146.59    9.80
  -6  -3   5   63.59    7.10
  -6  -3   5   56.39    6.90
  -6  -3   5   58.19    6.70
  -6   3   5   65.29    6.60
  -6   3   5   79.79    8.00
  -5  -3   5   11.50    3.20
   5  -3  -5   11.40    3.40
  -5  -3   5   12.30    3.40
   5  -3  -5   11.60    3.00
  -5   3   5   11.50    3.50
  -5   3   5    7.50    2.50
  -5   3   5   13.20    3.00
  -4  -3   5    2.70    2.10
   4  -3  -5    5.80    2.20
  -4  -3   5    6.10    2.60
   4  -3  -5    3.00    1.70
  -4   3   5    2.20    2.20
  -4   3   5    1.30    1.80
  -4   3   5    1.30    1.80
  -3  -3   5  275.97    9.40
   3  -3  -5  252.67    8.30
  -3  -3   5  265.97    5.30
  -3  -3   5  283.27   10.10
   3  -3  -5  257.07    6.50
  -3   3   5  240.08    9.40
  -3   3   5  263.57    8.20
  -3   3   5  256.97    8.40
  -2  -3   5   28.70    3.50
  -2  -3   5   35.30    3.70
   2  -3  -5   33.80    1.90
   2  -3  -5   34.40    3.30
  -2   3   5   30.80    2.90
  -2   3   5   37.50    3.70
   2   3  -5   37.20    3.80
  -2   3   5   32.10    3.60
   1  -3  -5   40.70    3.00
  -1  -3   5   52.99    4.00
  -1   3   5   44.40    3.30
  -1   3   5   42.50    2.70
  -1   3   5   48.20    3.60
   0  -3   5    7.70    1.90
   0  -3   5    4.10    1.40
   0  -3  -5    8.10    1.60
   0  -3  -5    6.70    1.00
   0   3   5    5.30    1.80
   0   3  -5    7.50    1.50
   0   3   5    7.10    1.40
   0   3  -5    4.30    1.60
   1  -3   5   46.30    3.70
  -1  -3  -5   41.60    2.70
  -1  -3  -5   45.80    2.70
   1  -3   5   46.20    3.20
  -1  -3  -5   40.60    3.20
  -1   3  -5   50.19    3.70
   1   3   5   47.60    3.10
   2  -3   5   33.30    3.30
  -2  -3  -5   35.10    3.60
   2  -3   5   33.90    3.60
  -2  -3  -5   28.70    2.40
  -2   3  -5   32.40    3.50
  -2   3  -5   28.50    3.30
  -3  -3  -5  237.38    6.40
  -3  -3  -5  239.98    9.00
   3  -3   5  257.97    9.10
   3  -3   5  253.97    8.30
  -3   3  -5  255.47    9.30
  -3   3  -5  253.87    9.30
  -4  -3  -5    3.90    2.60
   4  -3   5    2.10    2.10
  -4  -3  -5    0.80    1.70
  -4  -3  -5    1.40    1.70
   4  -3   5    0.70    1.70
  -4   3  -5    0.30    1.90
  -4   3  -5    3.00    2.60
   5  -3   5    8.70    3.00
   5  -3   5    9.00    3.20
  -5  -3  -5   12.80    3.30
  -5  -3  -5   14.10    3.80
  -5   3  -5    6.00    3.20
  -5   3  -5    7.10    3.00
  -6  -3  -5   64.29    7.30
   6  -3   5   64.29    7.20
  -6  -3  -5   77.49    7.50
   6  -3   5   69.89    6.70
  -6   3  -5   76.19    7.80
  -6   3  -5   63.39    7.00
  -7  -3  -5  160.58   10.60
  -7  -3  -5  181.98   11.70
   7  -3   5  167.68   10.40
  -7   3  -5  179.38   11.10
  -7   3  -5  141.69   10.30
  -8  -3  -5  236.68   14.30
   8  -3   5  220.18   12.80
  -8   3  -5  254.37   14.30
   9  -3   5   44.50    7.80
  -9  -3  -5   22.90    6.80
  -9   3  -5   35.60    7.60
 -10  -3  -5  138.29   15.00
 -10  -3  -5  110.99   13.60
  10  -3   5  134.49   13.10
 -10   3  -5  119.19   12.50
  -9  -4   5    9.80    6.00
  -9  -4   5   13.80    5.40
  -9   4   5    5.30    5.40
  -8  -4   5    0.50    3.70
  -8  -4   5    4.60    4.40
  -8   4   5    4.60    4.40
  -8   4   5    8.00    4.70
  -7  -4   5    7.60    4.50
  -7  -4   5    0.70    3.50
  -7  -4   5    0.80    3.40
  -7   4   5    4.40    3.70
  -7   4   5   -5.30    3.60
  -6  -4   5  212.98   11.80
   6  -4  -5  192.78   10.60
  -6  -4   5  210.68   11.10
  -6  -4   5  197.98   11.30
  -6   4   5  196.28   10.30
  -6   4   5  183.78   11.10
   5  -4  -5   25.30    4.50
  -5  -4   5   13.80    3.70
  -5  -4   5   13.20    3.90
  -5   4   5   23.90    4.70
  -5   4   5   21.30    4.00
  -5   4   5   21.20    3.70
  -4  -4   5  132.49    7.80
  -4  -4   5  132.29    8.30
   4  -4  -5  129.79    7.10
   4  -4  -5  122.69    5.40
  -4   4   5  113.49    7.60
  -4   4   5  127.99    6.90
  -4   4   5  115.69    6.70
  -3  -4   5   17.90    3.70
  -3  -4   5   22.90    3.70
   3  -4  -5   21.00    3.40
   3  -4  -5   18.50    2.20
  -3   4   5   22.50    3.90
  -3   4   5   22.70    3.30
   3   4  -5   16.30    3.40
  -3   4   5   25.70    3.50
  -2  -4   5  142.79    6.90
   2  -4  -5  156.78    4.20
   2  -4  -5  136.69    6.20
  -2  -4   5  149.79    7.50
   2   4  -5  152.28    7.20
  -2   4   5  149.09    7.00
  -2   4   5  153.78    6.30
  -2   4   5  149.39    7.10
  -1  -4   5  304.77   10.20
  -1  -4   5  323.07    9.50
   1  -4  -5  312.37    5.90
   1  -4  -5  317.67    9.00
  -1   4   5  312.47    8.70
   1   4  -5  322.67    6.50
  -1   4   5  316.87    9.50
   1   4  -5  326.77   10.30
   0  -4  -5  166.88    4.70
   0  -4   5  161.58    7.30
   0  -4   5  177.48    6.50
   0  -4  -5  162.78    6.40
   0   4  -5  171.58    5.70
   0   4   5  178.28    6.40
   0   4  -5  185.18    7.70
  -1  -4  -5  313.47    9.60
   1  -4   5  314.27    8.80
   1  -4   5  309.17    9.90
  -1  -4  -5  307.87    7.80
  -1   4  -5  329.67    9.00
   1   4   5  331.17    9.20
  -1   4  -5  323.37   10.10
  -2  -4  -5  153.98    4.90
  -2  -4  -5  158.18    6.20
   2  -4   5  144.79    7.20
   2  -4   5  149.69    6.40
  -2  -4  -5  143.69    7.10
  -2   4  -5  147.39    6.80
  -2   4  -5  143.19    7.10
   3  -4   5   20.10    3.70
  -3  -4  -5   15.90    3.50
  -3  -4  -5   23.00    3.40
   3  -4   5   16.90    3.10
  -3  -4  -5   22.70    2.30
  -3   4  -5   22.80    3.60
  -3   4  -5   20.90    3.40
   4  -4   5  122.19    6.50
  -4  -4  -5  115.89    6.70
  -4  -4  -5  103.19    7.20
   4  -4   5  113.09    7.10
  -4   4  -5  138.39    8.20
  -4   4  -5  116.79    7.30
  -5  -4  -5   26.80    4.30
   5  -4   5   18.30    3.80
  -5  -4  -5   15.30    3.70
  -5  -4  -5   22.10    4.60
   5  -4   5   19.30    3.90
  -5   4  -5   21.90    4.40
  -5   4  -5    8.20    3.50
  -6  -4  -5  194.28   11.70
   6  -4   5  197.98   11.20
   6  -4   5  225.78   10.60
  -6  -4  -5  218.58   11.20
  -6  -4  -5  207.88   10.90
  -6   4  -5  209.78   11.80
  -6   4  -5  217.18   11.50
   7  -4   5    4.70    4.20
  -7  -4  -5   -1.20    3.40
  -7  -4  -5    1.20    3.80
  -7  -4  -5   -0.30    3.50
   7  -4   5   -1.00    3.60
  -7   4  -5    5.00    4.20
  -7   4  -5    0.40    3.80
  -8  -4  -5    4.70    4.70
  -8  -4  -5    3.60    4.50
   8  -4   5   10.60    5.20
  -8   4  -5    3.80    4.30
  -9  -4  -5   14.10    5.80
  -9  -4  -5    6.50    5.90
   9  -4   5   11.60    6.00
  -9   4  -5   12.90    6.30
  -9  -5   5   36.30    7.50
  -9  -5   5   50.29    9.90
  -9   5   5   27.40    7.50
  -8  -5   5   54.99    8.50
  -8  -5   5   86.39   10.70
  -8   5   5   79.39   10.00
  -7  -5   5   72.79    8.50
  -7  -5   5   56.99    8.70
   7  -5  -5   54.79    7.60
  -7   5   5   53.99    7.90
  -7   5   5   67.99    8.00
  -6  -5   5   64.59    7.70
   6  -5  -5   50.49    6.80
  -6  -5   5   43.30    7.30
  -6   5   5   39.90    6.70
  -6   5   5   47.20    6.40
  -5  -5   5   -0.40    2.40
  -5  -5   5   -1.20    3.10
   5  -5  -5    3.70    2.90
  -5   5   5    0.10    2.70
  -5   5   5    1.30    2.70
  -5   5   5    4.30    3.70
  -4  -5   5   81.39    7.40
   4  -5  -5   83.99    6.40
  -4  -5   5   87.09    8.20
  -4   5   5   81.19    7.60
  -4   5   5   79.09    6.20
  -4   5   5   78.19    6.10
   3  -5  -5  179.48    8.20
  -3  -5   5  186.78    8.90
  -3  -5   5  183.58    9.80
  -3   5   5  183.78    9.30
  -3   5   5  181.08    7.90
   3   5  -5  178.18    9.10
   2  -5  -5  396.56    8.40
  -2  -5   5  426.26   12.60
  -2  -5   5  424.56   13.70
   2  -5  -5  386.66   11.50
  -2   5   5  409.16   12.60
   2   5  -5  420.26   13.30
  -2   5   5  410.66   11.50
  -1  -5   5  367.56   12.10
  -1  -5   5  353.56   10.80
   1  -5  -5  367.56    7.50
   1  -5  -5  369.06   10.90
   1   5  -5  365.16   11.90
   1   5  -5  364.26    7.60
  -1   5   5  355.16   10.50
  -1   5   5  348.37   10.70
   0  -5   5   20.70    3.10
   0  -5  -5   25.20    3.60
   0  -5  -5   27.50    2.60
   0  -5   5   23.30    3.80
   0   5  -5   26.30    2.90
   0   5   5   28.10    3.50
   0   5   5   25.80    3.20
   0   5  -5   22.90    3.80
  -1  -5  -5  363.26    9.30
   1  -5   5  370.26   11.70
  -1  -5  -5  349.37   11.20
   1  -5   5  364.36   10.30
   1   5   5  360.76   10.80
  -1   5  -5  380.86   12.10
  -1   5  -5  355.36   10.00
  -2  -5  -5  397.46   10.80
  -2  -5  -5  402.76   12.90
   2  -5   5  396.26   12.60
   2  -5   5  399.46   11.20
  -2   5  -5  409.76   12.10
   2   5   5  393.86   12.00
  -2   5  -5  411.76   12.80
  -3  -5  -5  185.58    9.20
   3  -5   5  162.88    8.70
   3  -5   5  186.78    8.00
  -3  -5  -5  191.58    8.20
  -3   5  -5  177.38    8.90
  -3   5  -5  188.98    9.10
  -4  -5  -5   81.89    7.90
   4  -5   5   79.79    7.40
   4  -5   5   75.49    5.80
  -4  -5  -5   82.29    6.30
  -4   5  -5   90.29    6.90
  -4   5  -5   86.99    7.20
  -5  -5  -5   -3.00    2.50
  -5  -5  -5   -0.40    2.90
   5  -5   5    0.10    2.80
   5  -5   5   -0.50    2.50
  -5   5  -5    1.60    3.20
  -5   5  -5    2.00    3.60
  -6  -5  -5   55.29    7.20
  -6  -5  -5   51.39    7.50
  -6  -5  -5   50.59    6.90
   6  -5   5   49.40    6.40
   6  -5   5   49.90    6.80
  -6   5  -5   50.69    6.80
  -6   5  -5   30.10    6.30
   7  -5   5   69.49    7.70
  -7  -5  -5   71.59    9.00
   7  -5   5   66.89    8.90
  -7  -5  -5   66.59    8.20
  -7  -5  -5   58.39    7.90
  -7   5  -5   63.09    8.50
  -8  -5  -5   83.99   10.80
  -8  -5  -5   57.99    8.60
   8  -5   5   73.79    9.70
   8  -5   5   76.89    9.10
  -8   5  -5   72.09    9.30
  -9  -5  -5   41.90    8.90
  -9  -5  -5   46.60    8.70
  -9   5  -5   27.90    8.00
   8  -6  -5    1.70    5.30
  -8  -6   5   -3.10    5.50
  -8  -6   5   13.10    5.40
  -8   6   5   10.50    6.10
  -7  -6   5   38.00    7.60
  -7  -6   5   29.50    6.30
   7  -6  -5   33.90    6.90
  -7   6   5   27.70    6.20
  -7   6   5   30.20    6.40
  -6  -6   5    5.20    4.30
   6  -6  -5    1.60    3.90
  -6  -6   5    7.30    4.30
  -6   6   5    1.30    3.70
  -6   6   5    8.00    4.80
   5  -6  -5   67.69    7.40
  -5  -6   5   54.99    7.70
  -5  -6   5   61.59    7.30
  -5   6   5   75.09    7.50
  -5   6   5   50.99    7.20
   4  -6  -5   -0.30    2.70
  -4  -6   5    3.30    3.10
  -4  -6   5    4.40    2.80
  -4   6   5   -1.10    2.40
  -4   6   5    5.20    3.30
   3  -6  -5   55.99    5.90
  -3  -6   5   54.79    6.70
  -3  -6   5   61.79    6.30
  -3   6   5   64.69    6.80
  -3   6   5   64.99    6.00
   3   6  -5   55.09    6.30
  -2  -6   5  123.29    7.40
  -2  -6   5  120.19    8.20
   2  -6  -5  114.99    7.00
  -2   6   5  121.99    7.40
  -2   6   5  120.29    7.00
   2   6  -5  119.49    7.80
  -1  -6   5  214.58    8.80
   1  -6  -5  220.78    9.10
  -1  -6   5  222.98   10.10
  -1   6   5  224.98    9.30
   1   6  -5  251.47   10.80
  -1   6   5  234.08    9.40
   0  -6  -5    1.60    1.50
   0  -6   5    1.30    1.80
   0  -6   5    2.80    2.40
   0  -6  -5    1.60    2.10
   0   6   5    1.70    1.90
   0   6  -5    1.00    2.40
   0   6   5    4.90    2.20
   0   6  -5    3.20    1.80
  -1  -6  -5  232.08   10.00
  -1  -6  -5  214.08    7.70
   1  -6   5  232.48   10.00
   1  -6   5  215.88    8.50
   1   6   5  221.78    7.60
   1   6   5  234.98    9.70
  -1   6  -5  224.58   10.20
  -1   6  -5  231.28    8.50
   2  -6   5  129.49    8.10
  -2  -6  -5  118.79    6.40
   2  -6   5  120.19    6.70
  -2  -6  -5  113.29    7.60
   2   6   5  133.19    7.60
  -2   6  -5  106.59    7.00
  -2   6  -5  131.59    7.90
  -3  -6  -5   57.99    6.80
   3  -6   5   58.19    6.40
  -3  -6  -5   60.09    5.90
   3  -6   5   59.69    5.60
  -3   6  -5   65.89    6.70
  -3   6  -5   58.69    6.50
   4  -6   5    3.00    2.70
  -4  -6  -5    1.70    2.90
   4  -6   5    1.90    3.20
  -4  -6  -5    0.70    2.40
  -4   6  -5    6.60    3.70
  -4   6  -5    0.00    2.50
   5  -6   5   56.69    7.10
  -5  -6  -5   58.49    6.90
  -5  -6  -5   50.49    7.40
   5  -6   5   69.79    6.90
  -5   6  -5   57.89    7.50
  -5   6  -5   64.79    7.80
   6  -6   5    2.70    3.50
  -6  -6  -5   -5.60    3.90
   6  -6   5    1.40    3.50
  -6  -6  -5   -1.50    3.50
  -6  -6  -5    1.30    3.90
  -6   6  -5    1.10    3.50
  -6   6  -5    6.60    4.70
  -7  -6  -5   41.80    8.40
  -7  -6  -5   25.70    5.70
   7  -6   5   21.80    5.70
   7  -6   5   33.20    6.80
  -7   6  -5   37.50    7.50
   8  -6   5   14.20    6.50
  -8  -6  -5   12.40    5.20
  -8  -6  -5   13.00    6.80
  -8   6  -5   15.30    6.40
  -8  -7   5   10.70    6.50
   8  -7  -5   -2.60    5.10
  -8  -7   5   -1.50    4.60
  -8   7   5    7.20    6.30
  -7  -7   5    7.20    5.60
   7  -7  -5   -0.60    5.10
  -7  -7   5    3.70    4.60
  -7   7   5   -0.80    4.90
  -6  -7   5   30.80    6.30
  -6  -7   5   29.60    7.20
   6  -7  -5   22.00    5.90
  -6   7   5   26.30    6.40
  -6   7   5   19.50    6.30
   5  -7  -5   24.50    5.80
  -5  -7   5   23.90    6.00
  -5  -7   5   14.90    4.60
  -5   7   5   33.90    6.50
  -5   7   5   13.60    4.40
  -4  -7   5  129.49   10.50
  -4  -7   5  131.09    9.20
   4  -7  -5  135.79    9.70
  -4   7   5  138.29    9.20
  -4   7   5  149.59   10.40
  -3  -7   5   81.79    7.80
   3  -7  -5   85.59    7.80
  -3  -7   5   95.19    9.10
   3   7  -5   89.59    8.40
  -3   7   5   95.69    8.00
  -3   7   5   77.99    7.20
  -2  -7   5  118.49    8.80
   2  -7  -5  108.89    7.80
  -2  -7   5  124.19    8.00
  -2   7   5  114.69    7.90
  -2   7   5  106.79    7.50
   2   7  -5  115.39    8.80
   1  -7  -5   17.20    3.80
  -1  -7   5   12.20    3.30
  -1  -7   5   30.00    5.30
  -1   7   5   25.10    4.20
  -1   7   5   31.60    4.80
   1   7  -5   18.40    4.20
   0  -7   5   16.00    4.00
   0  -7   5   18.50    3.40
   0  -7  -5    9.80    3.10
   0   7   5   12.50    3.50
   0   7  -5   20.50    4.50
   0   7   5   10.10    3.00
   1  -7   5   24.30    3.90
  -1  -7  -5   25.10    4.40
   1  -7   5   17.10    4.30
   1   7   5   15.60    3.80
  -1   7  -5   17.70    3.50
  -1   7  -5   14.90    4.10
   2  -7   5  108.99    8.20
  -2  -7  -5  119.39    7.10
  -2  -7  -5  121.49    8.70
   2  -7   5  118.79    7.20
   2   7   5  119.49    8.10
  -2   7  -5  119.79    7.70
  -2   7  -5  108.49    8.50
   3  -7   5   92.99    8.60
   3  -7   5   90.69    6.70
  -3  -7  -5   90.39    7.10
  -3  -7  -5   93.19    9.00
  -3   7  -5   87.79    8.50
  -3   7  -5  100.89    8.60
  -4  -7  -5  142.59    9.10
   4  -7   5  132.49    8.30
   4  -7   5  141.39   10.00
  -4  -7  -5  150.48   10.90
  -4   7  -5  135.39   10.10
  -4   7  -5  138.09    9.80
   5  -7   5   17.50    4.80
   5  -7   5   25.00    5.70
  -5  -7  -5   15.10    5.50
  -5  -7  -5   28.10    5.60
  -5   7  -5   21.00    5.40
  -5   7  -5    8.80    5.00
   6  -7   5   33.10    6.80
  -6  -7  -5   27.10    6.90
  -6  -7  -5   32.10    6.40
  -6   7  -5   27.00    6.70
  -7  -7  -5    0.10    4.40
   7  -7   5    3.20    5.10
  -7  -7  -5   -1.30    4.40
  -7   7  -5    9.40    5.80
  -8  -7  -5    5.30    6.30
  -8  -7  -5    9.20    5.70
   8  -7   5    1.40    5.60
  -8   7  -5   11.00    6.40
   7  -8  -5   22.40    7.10
  -7  -8   5   13.00    6.60
  -7  -8   5    8.40    6.10
  -7   8   5   17.00    7.00
  -6  -8   5  104.39   11.10
   6  -8  -5   87.79   10.00
  -6  -8   5   75.09   10.70
  -6   8   5  107.89   11.10
   5  -8  -5   30.50    6.50
  -5  -8   5   44.00    8.10
  -5  -8   5   34.20    7.10
  -5   8   5   44.30    7.50
   4  -8  -5   45.30    6.70
  -4  -8   5   39.10    7.20
  -4  -8   5   61.19    7.70
  -4   8   5   40.30    6.70
  -4   8   5   49.90    7.70
  -3  -8   5  174.38   11.90
   3  -8  -5  211.58   11.50
  -3  -8   5  188.68   11.00
  -3   8   5  202.18   11.50
   3   8  -5  213.18   12.70
  -3   8   5  186.08   11.20
  -2  -8   5  333.67   13.50
   2  -8  -5  333.27   14.00
  -2  -8   5  359.06   15.50
  -2   8   5  378.76   14.50
  -2   8   5  343.17   14.00
   2   8  -5  348.37   15.40
  -1  -8   5  122.29    8.10
   1  -8  -5  131.09    9.00
  -1  -8   5  116.89    9.40
  -1   8   5  145.59    9.30
   1   8  -5  122.79    9.60
   0  -8   5  103.29    7.30
   0  -8  -5  114.09    8.20
   0  -8   5  112.59    9.00
   0   8   5  126.39    8.90
   0   8  -5  133.59    9.90
   1  -8   5  119.89    7.70
  -1  -8  -5  140.39    9.50
   1  -8   5  137.59    9.90
  -1   8  -5  139.29   10.00
   1   8   5  114.19    8.70
   2  -8   5  356.16   15.20
   2  -8   5  358.46   12.80
  -2  -8  -5  377.96   15.50
  -2   8  -5  324.07   12.80
   2   8   5  349.57   14.20
  -2   8  -5  346.87   15.00
   3  -8   5  198.78   11.90
   3  -8   5  185.28   10.50
  -3  -8  -5  199.28   12.20
  -3   8  -5  215.58   11.50
  -3   8  -5  211.98   12.30
  -4  -8  -5   46.60    6.70
  -4  -8  -5   45.60    7.70
   4  -8   5   48.60    7.30
  -4   8  -5   31.10    6.30
  -4   8  -5   39.20    6.80
   5  -8   5   29.60    6.50
  -5  -8  -5   45.60    8.50
  -5  -8  -5   45.40    7.00
  -5   8  -5   38.70    7.20
  -6  -8  -5   91.09   11.10
  -6  -8  -5   90.49   10.20
   6  -8   5  100.89   10.90
  -6   8  -5  105.09   11.20
   7  -8   5    6.80    5.80
  -7  -8  -5   11.30    5.50
  -7  -8  -5    4.50    5.30
  -7   8  -5   11.90    6.60
   6  -9  -5    6.80    5.90
  -6  -9   5   -5.60    4.60
  -6  -9   5    4.30    5.00
  -6   9   5    6.40    6.00
  -5  -9   5   -2.80    4.80
  -5  -9   5    3.30    4.80
   5  -9  -5    4.70    4.70
  -5   9   5    1.10    5.10
  -4  -9   5   63.59    8.20
   4  -9  -5   75.39    9.30
  -4  -9   5   70.19    9.40
  -4   9   5   73.69    9.30
  -3  -9   5   67.09    8.70
  -3  -9   5   74.49    8.40
   3  -9  -5   73.29    8.50
  -3   9   5   76.19    8.40
  -2  -9   5   16.80    5.80
   2  -9  -5   15.00    5.00
  -2  -9   5   12.40    4.50
  -2   9   5   18.30    5.30
   2   9  -5   16.40    5.70
  -1  -9   5   74.59    7.80
  -1  -9   5   59.29    8.00
   1  -9  -5   68.09    8.00
  -1   9   5   62.89    7.70
   1   9  -5   75.09    8.70
   0  -9   5    0.40    3.80
   0  -9  -5    1.00    3.20
   0  -9   5   -0.20    2.80
   0   9  -5   -0.70    3.70
   0   9   5   -2.10    3.30
  -1  -9  -5   83.09    8.90
   1  -9   5   76.49    9.00
   1  -9   5   85.99    8.40
   1   9   5   63.69    7.70
  -1   9  -5   68.09    8.60
   2  -9   5   15.80    5.20
  -2  -9  -5   12.30    4.70
   2   9   5   26.20    5.60
  -2   9  -5   25.60    6.00
  -3  -9  -5   61.09    8.40
   3  -9   5   55.99    7.90
  -3   9  -5   71.79    9.90
   4  -9   5   63.39    8.90
  -4  -9  -5   75.79    9.80
  -4   9  -5   85.59    9.40
  -5  -9  -5   -1.10    5.00
   5  -9   5    2.90    5.20
  -5   9  -5    3.90    5.60
  -6  -9  -5   -0.30    6.00
   6  -9   5   12.80    6.10
  -6  -9  -5    1.60    5.70
  -6   9  -5    0.40    5.50
  -5 -10   5   34.50    7.30
   5 -10  -5   18.10    6.80
  -5 -10   5   30.00    8.30
  -5  10   5   14.30    6.60
  -4 -10   5   62.79   10.10
  -4 -10   5   50.39    8.00
   4 -10  -5   48.90    8.70
  -4  10   5   50.69    8.70
  -3 -10   5   10.80    4.70
  -3 -10   5    3.90    5.20
   3 -10  -5   -0.10    4.40
  -2 -10   5    4.00    4.60
  -2 -10   5    2.50    4.20
   2 -10  -5    3.80    5.10
  -1 -10   5    1.10    4.30
   1 -10  -5    0.50    4.10
   0 -10   5   14.50    5.30
   0 -10  -5   12.90    5.10
   1 -10   5    7.10    4.70
  -1 -10  -5    5.10    4.20
   1  10   5    3.30    5.20
  -2 -10  -5    6.00    5.10
   2 -10   5    6.90    4.60
  -3 -10  -5   10.50    5.70
   3 -10   5   12.60    5.30
  -4 -10  -5   46.30    9.00
   4 -10   5   63.19    9.30
   5 -10   5   16.90    7.00
  -5 -10  -5   24.30    7.60
  -5  10  -5   25.50    7.90
  -3 -11   5    0.10    5.60
   3 -11  -5    7.80    5.80
   2 -11  -5   22.20    7.10
  -2 -11   5   12.70    5.70
   1 -11  -5   21.60    6.60
  -1 -11   5   29.50    7.20
   0 -11   5    3.90    5.50
   0 -11  -5    0.60    4.70
  -1 -11  -5   27.70    6.80
   1 -11   5   21.60    6.90
   2 -11   5    7.60    5.00
  -2 -11  -5   12.30    6.70
  -3 -11  -5    0.10    5.50
   3 -11   5    3.00    5.80
 -10   0   6   10.00    5.70
 -10   0   6   16.50    6.70
  -9   0   6   -3.10    3.90
  -9   0   6   -2.70    4.30
  -8   0   6   27.20    5.50
  -8   0   6   35.30    6.20
  -8   0   6   34.70    6.60
  -7   0   6  103.09    8.60
  -7   0   6   94.59    7.40
  -7   0   6   91.99    7.70
  -7   0   6   96.59    8.20
  -6   0   6  271.77   11.70
  -6   0   6  293.37   11.80
  -6   0   6  290.87   11.20
  -6   0   6  276.47   11.00
  -6   0   6  269.87   10.70
  -5   0   6    9.10    2.90
  -5   0   6    8.50    2.30
  -5   0   6    9.70    2.60
  -5   0   6   12.00    2.90
  -5   0   6    8.40    2.80
  -4   0   6   99.49    5.70
  -4   0   6  100.29    5.10
  -4   0   6  103.59    5.30
  -4   0   6  104.49    5.90
  -4   0   6  126.59    6.20
  -3   0   6  219.68    6.80
  -3   0   6  213.68    7.00
  -3   0   6  204.28    6.50
  -3   0   6  205.48    6.70
  -3   0   6  223.18    7.10
  -2   0   6 1022.60   16.00
  -2   0   6 1053.69   15.60
  -2   0   6 1025.00   15.50
  -2   0   6  991.70   15.20
  -1   0   6 5481.05   61.59
   1   0  -6 5476.25   61.29
  -1   0   6 5414.56   60.09
  -1   0   6 5513.45   59.29
   0   0  -6    6.30    1.30
   0   0   6    5.60    1.00
   0   0  -6    5.10    0.70
   0   0   6    3.20    1.00
  -1   0  -6 5569.14   61.99
  -1   0  -6 5434.86   60.29
   1   0   6 5499.45   60.99
   1   0   6 5475.05   60.49
   1   0   6 5499.25   59.39
   1   0   6 5406.66   59.89
  -2   0  -6 1008.10   16.20
   2   0   6  998.30   15.90
  -2   0  -6 1000.70   15.90
  -3   0  -6  214.38    7.40
  -3   0  -6  216.98    7.20
   3   0   6  215.48    7.00
  -4   0  -6  113.19    6.00
   4   0   6   91.19    5.50
  -4   0  -6  102.59    5.90
  -5   0  -6    7.70    2.80
  -5   0  -6   14.00    3.20
   5   0   6    5.80    2.50
  -6   0  -6  287.37   11.40
   6   0   6  280.17   11.50
  -6   0  -6  270.17   11.60
   7   0   6  103.39    9.20
  -7   0  -6   86.49    8.60
  -7   0  -6   93.09    8.30
  -7   0  -6   95.69    9.30
  -8   0  -6   37.40    6.50
  -8   0  -6   25.60    5.90
   8   0   6   32.30    6.30
  -8   0  -6   30.80    6.10
  -9   0  -6   -8.30    4.10
 -10   0  -6    0.50    5.00
 -10  -1   6    5.60    5.80
 -10  -1   6   -2.80    5.10
 -10   1   6   10.10    6.20
  -9  -1   6   28.80    6.90
  -9  -1   6   39.00    7.30
  -9   1   6   38.50    7.00
  -9   1   6   35.80    7.30
  -8  -1   6   20.10    5.70
  -8  -1   6   15.90    5.10
  -8  -1   6   18.20    5.30
  -8   1   6   11.60    5.00
  -8   1   6   10.50    4.80
  -8   1   6   18.50    5.30
  -7  -1   6   30.90    5.60
  -7  -1   6   25.40    4.90
  -7  -1   6   29.10    5.50
  -7   1   6   45.50    6.40
  -7   1   6   30.00    5.30
  -7   1   6   31.10    5.40
  -6  -1   6    3.70    2.70
  -6  -1   6    0.30    2.30
  -6  -1   6    5.30    3.00
  -6  -1   6    0.40    2.40
  -6  -1   6    6.50    2.50
  -6   1   6    2.30    2.90
  -6   1   6    2.90    2.50
  -6   1   6    4.00    2.60
  -6   1   6    4.50    2.60
  -5  -1   6   10.40    3.10
  -5  -1   6    5.40    2.80
  -5  -1   6   11.30    2.50
  -5  -1   6   11.60    2.80
  -5  -1   6   15.80    3.10
  -5   1   6    9.90    2.60
  -5   1   6   10.50    2.70
  -5   1   6   13.30    3.30
  -4  -1   6  380.76   11.30
  -4  -1   6  392.66   11.60
  -4  -1   6  397.66   10.30
  -4  -1   6  408.96   11.40
  -4   1   6  383.86   10.60
  -4   1   6  395.96   10.10
  -4   1   6  395.56   11.80
  -3  -1   6    3.20    1.70
  -3  -1   6    4.70    1.60
  -3  -1   6    4.70    1.80
  -3   1   6    4.40    1.50
  -3   1   6    4.30    1.50
  -3   1   6    5.50    1.90
  -2  -1   6  472.55   10.00
  -2  -1   6  471.65    9.90
  -2   1   6  501.65   10.20
  -2   1   6  490.95    8.90
  -2   1   6  473.55    8.40
  -1  -1   6 9599.24  103.69
   1  -1  -6 9504.55   99.99
   1  -1  -6 9435.76  103.99
  -1  -1   6 9588.54  102.99
  -1   1   6 9566.84  101.59
   1   1  -6 9999.00  104.79
  -1   1   6 9673.23  105.49
   1   1  -6 9478.75  103.79
   0  -1   6   10.70    1.30
   0  -1  -6   11.00    0.70
   0  -1  -6   11.40    0.60
   0  -1  -6   13.10    1.80
   0  -1   6   10.40    1.40
   0   1  -6   12.10    1.40
   0   1   6   12.50    1.70
   0   1  -6   11.00    1.60
   1  -1   6 9858.21  106.39
  -1  -1  -6 9633.04  105.99
   1  -1   6 9743.33  105.59
  -1  -1  -6 9896.61  105.99
  -1  -1  -6 9802.32  104.69
  -1   1  -6 9804.22  106.29
   1   1   6 9847.81  104.49
   1   1   6 9670.93  104.29
  -1   1  -6 9664.73  105.79
  -2  -1  -6  503.05   10.20
  -2  -1  -6  490.05    9.90
   2  -1   6  495.45   10.30
  -2  -1  -6  501.15    9.90
   2  -1   6  469.05   10.10
  -2   1  -6  495.55   10.70
  -2   1  -6  484.65   10.40
   2   1   6  481.05    9.70
   2   1   6  471.55    7.70
  -3  -1  -6    4.10    1.70
  -3  -1  -6    6.20    1.80
   3  -1   6    6.90    2.00
   3  -1   6    3.60    1.70
  -3  -1  -6    6.10    1.80
  -3   1  -6    1.90    1.50
  -3   1  -6    3.10    2.00
   3   1   6    5.70    1.80
  -4  -1  -6  404.16   12.00
  -4  -1  -6  366.06   11.20
  -4  -1  -6  417.36   10.70
   4  -1   6  400.26   11.60
   4  -1   6  387.46   11.10
   4   1   6  406.26   11.50
  -4   1  -6  382.36   11.60
  -4   1  -6  390.16   11.70
  -5  -1  -6   16.80    3.30
  -5  -1  -6   10.50    2.80
   5  -1   6   11.60    3.10
  -5  -1  -6   13.30    3.20
   5   1   6   12.30    3.30
  -5   1  -6   12.00    3.20
  -5   1  -6   16.60    3.30
  -6  -1  -6    2.80    2.70
  -6  -1  -6    6.90    3.00
   6  -1   6    0.90    2.60
  -6  -1  -6    5.10    2.90
  -6   1  -6    2.90    2.70
  -6   1  -6    4.90    3.10
   6   1   6    2.80    2.70
  -7  -1  -6   41.20    6.70
  -7  -1  -6   36.50    5.90
  -7  -1  -6   38.80    5.70
   7  -1   6   31.40    5.60
  -7   1  -6   28.10    5.50
   7   1   6   28.30    5.50
  -7   1  -6   35.40    5.80
  -8  -1  -6   16.10    5.60
   8  -1   6   30.60    6.30
  -8  -1  -6   22.40    5.60
  -8   1  -6   15.90    5.80
  -8   1  -6   21.30    5.60
   9  -1   6   44.70    7.90
  -9  -1  -6   33.60    7.50
  -9   1  -6   30.90    7.60
  -9   1  -6   30.50    7.30
 -10  -1  -6    2.30    6.20
 -10   1  -6    1.70    5.90
 -10  -2   6    0.30    5.60
 -10  -2   6   -0.30    4.80
 -10   2   6   -0.80    4.90
  -9  -2   6   -2.60    3.90
  -9  -2   6   -1.20    4.40
  -9   2   6   -2.00    4.00
  -9   2   6   -0.80    4.50
  -8  -2   6    3.50    4.40
  -8  -2   6   -0.20    3.30
  -8  -2   6    5.00    4.10
  -8   2   6    0.20    3.90
  -8   2   6    7.10    4.40
  -8   2   6    8.40    4.10
  -7  -2   6   44.00    6.80
  -7  -2   6   43.80    6.60
  -7  -2   6   48.90    6.70
  -7   2   6   47.50    6.70
  -7   2   6   46.10    6.10
  -6  -2   6  629.84   18.20
  -6  -2   6  624.44   18.80
  -6  -2   6  617.14   17.80
  -6   2   6  656.33   17.70
  -6   2   6  569.44   22.20
  -6   2   6  648.84   18.50
  -5  -2   6  297.77   11.40
  -5  -2   6  289.37   10.90
  -5  -2   6  292.17    8.90
  -5  -2   6  278.37   11.50
  -5   2   6  280.97   11.30
  -5   2   6  295.17   10.60
  -5   2   6  299.97    9.60
   4  -2  -6  103.19    5.80
  -4  -2   6   98.49    6.30
  -4  -2   6  111.49    5.00
  -4  -2   6   99.09    6.40
  -4   2   6  103.39    6.60
  -4   2   6   98.59    5.50
  -4   2   6  106.19    5.50
  -3  -2   6  596.94   10.70
  -3  -2   6  584.74   13.80
  -3  -2   6  617.54   13.90
   3  -2  -6  581.24   12.30
  -3   2   6  585.74   14.20
  -3   2   6  617.94   12.40
  -3   2   6  581.54   12.70
  -2  -2   6   70.39    4.30
   2  -2  -6   78.99    3.60
  -2  -2   6   76.29    4.20
  -2   2   6   77.09    4.20
  -2   2   6   75.09    3.30
   2   2  -6   70.89    2.80
   2   2  -6   76.29    4.20
  -2   2   6   77.39    4.50
   1  -2  -6  140.39    4.00
   1  -2  -6  131.99    3.50
  -1  -2   6  132.39    5.10
  -1  -2   6  127.19    5.00
   1   2  -6  125.89    3.80
   1   2  -6  134.09    5.10
  -1   2   6  132.49    5.00
  -1   2   6  125.99    3.50
   0  -2  -6   41.00    2.20
   0  -2  -6   40.80    2.70
   0  -2   6   38.10    2.70
   0  -2  -6   36.80    1.90
   0  -2   6   42.00    3.00
   0   2   6   39.30    1.90
   0   2  -6   49.99    2.70
   0   2  -6   44.40    2.90
   0   2   6   37.60    2.80
   1  -2   6  139.89    4.90
   1  -2   6  129.69    5.00
  -1  -2  -6  133.49    4.50
  -1  -2  -6  136.39    4.50
   1   2   6  133.39    4.60
  -1   2  -6  134.69    4.90
   1   2   6  132.89    4.00
  -1   2  -6  135.19    5.10
  -2  -2  -6   73.09    3.80
  -2  -2  -6   81.09    3.70
  -2  -2  -6   71.49    4.20
   2  -2   6   71.69    4.20
   2  -2   6   78.89    4.10
  -2   2  -6   76.89    4.30
   2   2   6   66.59    3.70
  -2   2  -6   79.49    4.50
   3  -2   6  612.24   13.90
  -3  -2  -6  592.64   13.20
   3  -2   6  613.74   13.30
  -3  -2  -6  598.54   11.80
  -3  -2  -6  597.54   13.80
  -3   2  -6  604.64   14.10
  -3   2  -6  606.14   14.00
   3   2   6  580.54   12.90
  -4  -2  -6   97.09    5.10
   4  -2   6  106.49    5.90
  -4  -2  -6   99.69    6.10
   4  -2   6  102.99    6.40
  -4  -2  -6   94.29    6.30
  -4   2  -6   94.59    6.30
  -4   2  -6   98.69    6.20
   4   2   6   97.29    5.70
   5  -2   6  311.37   11.60
  -5  -2  -6  304.27    9.60
  -5  -2  -6  279.77   10.90
   5  -2   6  305.27   10.80
  -5  -2  -6  306.17   11.90
  -5   2  -6  295.77   11.50
  -5   2  -6  290.37   11.30
  -6  -2  -6  630.84   15.60
  -6  -2  -6  646.94   19.20
  -6  -2  -6  616.44   18.30
   6  -2   6  644.94   17.70
  -6   2  -6  633.34   18.50
  -6   2  -6  631.44   18.30
  -7  -2  -6   52.69    7.30
  -7  -2  -6   32.60    5.50
   7  -2   6   56.89    7.00
  -7   2  -6   43.90    6.70
  -7   2  -6   41.60    6.50
   8  -2   6    3.20    3.80
  -8  -2  -6    0.00    4.00
  -8   2  -6    8.40    4.70
   9  -2   6   -1.50    4.60
  -9  -2  -6   -0.80    4.70
  -9   2  -6   -3.90    4.80
 -10  -2  -6   -2.90    4.60
  10  -2   6   -3.40    5.40
 -10   2  -6   -2.60    5.30
 -10   2  -6   -4.90    5.70
  -9  -3   6    3.90    5.00
  -9  -3   6    0.90    3.80
  -9   3   6    4.00    5.00
  -8  -3   6   20.00    5.40
  -8  -3   6   41.70    7.50
  -8   3   6   19.50    5.70
  -8   3   6   18.30    5.20
  -7  -3   6   40.00    6.50
  -7  -3   6   63.89    8.00
  -7  -3   6   43.20    6.30
  -7   3   6   36.80    5.90
  -7   3   6   45.40    6.90
  -6  -3   6    4.00    2.90
  -6  -3   6   -0.20    2.30
  -6  -3   6    2.10    2.70
  -6   3   6    2.00    3.20
  -6   3   6   -0.50    2.50
  -6   3   6    1.50    3.00
  -5  -3   6   -0.40    2.40
  -5  -3   6    1.80    2.00
   5  -3  -6   -1.80    2.10
  -5   3   6    1.30    2.00
  -5   3   6   -1.60    2.30
  -5   3   6    0.90    1.90
   4  -3  -6  130.69    6.90
  -4  -3   6  130.89    7.20
  -4  -3   6  129.39    7.70
   4  -3  -6  123.09    5.30
  -4   3   6  130.69    6.50
  -4   3   6  132.69    7.70
  -4   3   6  129.69    6.50
  -3  -3   6  139.19    6.70
  -3  -3   6  132.69    4.00
   3  -3  -6  127.89    5.90
  -3  -3   6  144.39    7.40
   3  -3  -6  133.99    4.50
  -3   3   6  136.99    6.50
  -3   3   6  138.09    7.10
  -3   3   6  132.29    5.80
  -2  -3   6    5.80    2.10
   2  -3  -6    4.40    1.00
  -2  -3   6    4.50    2.00
   2  -3  -6    6.60    1.80
   2   3  -6    7.70    1.20
  -2   3   6    7.10    1.70
  -2   3   6    2.80    1.70
  -2   3   6    3.80    2.00
   2   3  -6   10.60    2.40
  -1  -3   6   32.60    3.30
   1  -3  -6   42.60    2.90
  -1  -3   6   40.60    3.90
   1   3  -6   44.50    2.50
   1   3  -6   45.60    3.60
  -1   3   6   45.90    2.70
  -1   3   6   39.90    3.70
   0  -3  -6   15.70    1.30
   0  -3  -6   12.20    1.90
   0  -3   6   15.80    2.50
   0  -3   6   16.30    2.30
   0   3  -6   17.20    2.50
   0   3   6    9.90    1.50
   0   3  -6   17.90    2.00
   0   3   6   16.20    2.40
   1  -3   6   41.30    3.30
   1  -3   6   40.80    3.70
  -1  -3  -6   39.80    2.80
  -1  -3  -6   40.60    3.20
  -1  -3  -6   39.20    2.50
  -1   3  -6   40.70    3.30
  -1   3  -6   44.30    3.60
   1   3   6   44.20    3.10
  -2  -3  -6    6.10    2.10
   2  -3   6    3.50    1.90
  -2  -3  -6    7.00    1.70
   2  -3   6    6.40    1.90
  -2   3  -6    2.30    1.80
  -2   3  -6    6.10    2.10
  -3  -3  -6  143.29    7.10
  -3  -3  -6  137.89    5.20
   3  -3   6  137.59    6.40
   3  -3   6  140.99    6.90
  -3   3  -6  146.99    7.30
  -3   3  -6  129.79    6.90
  -4  -3  -6  119.49    7.20
   4  -3   6  116.59    6.20
  -4  -3  -6  115.99    5.30
  -4  -3  -6  137.79    7.30
   4  -3   6  129.89    7.20
  -4   3  -6  118.09    7.00
  -4   3  -6  131.69    7.60
  -5  -3  -6    1.30    2.10
  -5  -3  -6    0.50    2.50
   5  -3   6    1.90    2.50
   5  -3   6   -1.90    2.20
  -5   3  -6    2.20    2.20
  -5   3  -6    1.00    2.40
   6  -3   6    2.80    2.90
  -6  -3  -6   -2.50    2.60
   6  -3   6    0.40    2.70
  -6  -3  -6    1.50    2.60
  -6   3  -6    2.20    3.20
  -6   3  -6    0.10    2.20
  -7  -3  -6   52.69    7.10
   7  -3   6   56.89    7.40
   7  -3   6   53.49    7.00
  -7  -3  -6   56.29    7.70
  -7   3  -6   49.40    7.10
  -7   3  -6   39.00    6.10
   8  -3   6   31.70    6.40
  -8  -3  -6   19.20    6.30
  -8   3  -6   19.50    6.00
  -9  -3  -6   10.80    5.40
   9  -3   6   -0.10    4.60
  -9   3  -6   -0.80    4.90
  -9  -4   6    8.70    5.80
  -9  -4   6    2.00    5.10
  -9   4   6   -1.10    5.00
  -8  -4   6   66.99    8.90
  -8  -4   6   75.29    9.70
  -8   4   6   79.99    9.70
  -8   4   6   62.19    8.10
  -7  -4   6  123.79   10.10
  -7  -4   6  144.29   10.60
  -7  -4   6  133.99   11.00
  -7   4   6  131.59   10.60
  -7   4   6  139.29    9.80
   6  -4  -6  122.09    8.60
  -6  -4   6  116.59    9.70
  -6  -4   6  122.79    9.00
  -6   4   6  118.19    9.40
  -6   4   6  109.69    8.10
  -5  -4   6    3.50    2.70
   5  -4  -6    1.70    2.50
  -5  -4   6    2.70    3.00
  -5   4   6    2.00    2.30
  -5   4   6    1.50    3.10
  -5   4   6    3.50    2.50
  -4  -4   6   17.40    4.00
   4  -4  -6   17.10    3.50
  -4  -4   6   22.30    4.00
  -4   4   6   18.00    3.90
  -4   4   6   14.10    3.00
  -4   4   6   19.30    3.70
  -3  -4   6  138.59    7.90
  -3  -4   6  153.68    7.80
   3  -4  -6  130.49    6.50
   3  -4  -6  144.89    4.70
   3   4  -6  125.99    7.20
  -3   4   6  129.69    7.50
  -3   4   6  132.79    6.90
  -3   4   6  142.49    6.50
  -2  -4   6   55.59    5.60
  -2  -4   6   61.19    5.40
   2  -4  -6   54.39    4.60
   2  -4  -6   52.19    2.40
  -2   4   6   44.90    3.80
  -2   4   6   45.80    4.60
  -2   4   6   52.09    5.00
   2   4  -6   45.10    4.70
  -1  -4   6  537.75   13.70
   1  -4  -6  520.15   11.70
  -1  -4   6  526.55   12.70
   1  -4  -6  535.45    7.90
  -1   4   6  530.55   12.80
   1   4  -6  537.95   13.60
  -1   4   6  544.15   13.40
  -1   4   6  542.85   11.50
   1   4  -6  529.25    9.30
   0  -4  -6  215.98    7.30
   0  -4   6  217.48    7.50
   0  -4   6  237.78    8.70
   0  -4  -6  224.68    5.30
   0   4  -6  227.38    6.70
   0   4   6  239.18    7.20
   0   4  -6  220.28    8.40
   1  -4   6  556.74   12.40
   1  -4   6  533.75   13.30
  -1  -4  -6  524.15   12.70
  -1  -4  -6  542.35   10.70
   1   4   6  534.25   12.00
  -1   4  -6  535.45   12.10
  -1   4  -6  546.15   13.40
  -2  -4  -6   51.49    3.80
   2  -4   6   59.79    5.40
  -2  -4  -6   52.79    3.40
   2  -4   6   45.00    4.30
  -2  -4  -6   51.39    4.90
  -2   4  -6   57.49    5.30
  -2   4  -6   54.89    5.00
   3  -4   6  132.29    7.20
   3  -4   6  147.59    6.90
  -3  -4  -6  131.69    4.90
  -3  -4  -6  133.39    6.50
  -3  -4  -6  127.49    7.20
  -3   4  -6  140.59    7.50
  -3   4  -6  134.59    7.30
   4  -4   6   14.90    3.30
   4  -4   6   17.00    3.80
  -4  -4  -6   14.70    3.60
  -4   4  -6   14.60    3.60
  -4   4  -6   19.50    3.80
  -5  -4  -6    4.30    2.60
   5  -4   6    2.90    2.70
  -5  -4  -6    6.30    3.00
   5  -4   6    2.50    2.60
  -5   4  -6    2.30    2.70
  -5   4  -6    2.40    3.00
   6  -4   6  121.89    8.50
   6  -4   6  120.39    9.20
  -6  -4  -6  117.89   10.30
  -6  -4  -6  131.59    9.20
  -6   4  -6  111.49    9.70
  -6   4  -6  132.49    9.20
  -7  -4  -6  153.18   11.60
  -7  -4  -6  143.09   10.30
   7  -4   6  139.09   10.60
   7  -4   6  133.49    9.50
  -7   4  -6  143.79   10.50
  -7   4  -6  141.49   10.20
  -8  -4  -6   55.99    8.90
  -8  -4  -6   71.99    9.30
   8  -4   6   75.29    9.00
  -8   4  -6   66.79    9.00
  -9  -4  -6   -3.20    5.00
   9  -4   6   18.20    6.30
  -9  -4  -6    9.40    5.80
  -9   4  -6    0.50    5.40
  -9  -5   6   23.10    7.70
  -9  -5   6   23.80    7.10
  -9   5   6   30.40    7.60
  -8  -5   6   15.00    6.40
  -8  -5   6    6.00    4.90
  -8   5   6    5.90    4.70
  -7  -5   6   52.59    7.60
   7  -5  -6   40.20    6.70
  -7  -5   6   37.10    7.20
  -7   5   6   41.90    7.30
  -7   5   6   24.70    5.70
  -6  -5   6    3.00    3.80
  -6  -5   6    3.40    3.20
   6  -5  -6    1.80    3.70
  -6   5   6    0.00    3.50
  -6   5   6   -3.40    2.80
  -5  -5   6   27.10    5.50
   5  -5  -6   18.60    4.50
  -5  -5   6   19.40    4.50
  -5   5   6   19.80    4.00
  -5   5   6   30.80    4.80
  -5   5   6   24.50    5.00
  -4  -5   6   19.30    4.70
   4  -5  -6   25.40    4.10
  -4  -5   6   22.30    4.40
  -4   5   6   25.30    4.10
  -4   5   6   15.30    3.80
  -4   5   6   11.40    3.40
  -3  -5   6    3.50    2.80
   3  -5  -6    3.20    2.30
  -3  -5   6    4.50    3.10
  -3   5   6    2.10    2.20
  -3   5   6    6.40    2.90
   3   5  -6    4.60    2.80
  -3   5   6   -0.90    1.80
   2  -5  -6   68.49    5.10
  -2  -5   6   67.79    6.80
  -2  -5   6   69.39    5.30
  -2   5   6   64.89    4.70
   2   5  -6   61.89    6.20
  -2   5   6   77.79    5.90
   1  -5  -6  450.45   12.00
  -1  -5   6  455.15   12.60
  -1  -5   6  444.86   13.50
   1  -5  -6  450.65    8.20
  -1   5   6  448.16   12.50
   1   5  -6  422.76   13.10
   1   5  -6  445.76    8.80
  -1   5   6  462.75   11.70
   0  -5   6    3.20    2.20
   0  -5   6    3.70    2.10
   0  -5  -6    4.00    2.00
   0  -5  -6    2.80    1.30
   0   5   6    1.10    1.70
   0   5   6    5.00    2.00
   0   5  -6    3.80    1.80
   0   5  -6    2.80    2.00
  -1  -5  -6  440.36   10.30
   1  -5   6  459.25   13.40
  -1  -5  -6  453.65   12.70
   1  -5   6  437.06   11.70
   1   5   6  457.65   12.10
  -1   5  -6  474.85   13.80
  -1   5  -6  483.15   12.00
  -2  -5  -6   64.39    6.00
   2  -5   6   69.79    5.90
   2  -5   6   63.39    4.60
  -2  -5  -6   66.29    4.50
  -2   5  -6   69.39    5.70
  -2   5  -6   68.29    5.30
  -3  -5  -6    4.20    2.90
   3  -5   6    3.30    2.70
  -3  -5  -6    2.80    2.00
   3  -5   6    5.60    2.40
  -3   5  -6    1.00    2.60
  -3   5  -6    2.40    2.20
  -4  -5  -6   16.20    4.10
  -4  -5  -6   17.10    3.60
   4  -5   6   21.30    4.20
   4  -5   6   20.20    3.70
  -4   5  -6   14.70    4.10
  -4   5  -6   22.80    4.10
  -5  -5  -6   28.30    5.00
   5  -5   6   26.90    4.60
  -5  -5  -6   22.40    4.60
   5  -5   6   21.40    4.90
  -5  -5  -6   24.80    5.30
  -5   5  -6   27.90    5.50
  -5   5  -6   20.40    4.40
  -6  -5  -6    3.00    3.40
   6  -5   6   -0.80    3.30
  -6  -5  -6    0.50    3.10
  -6  -5  -6    1.50    3.70
   6  -5   6    6.20    3.90
  -6   5  -6    0.90    3.70
  -6   5  -6    1.90    3.00
   7  -5   6   17.80    5.50
  -7  -5  -6   39.00    6.90
  -7  -5  -6   26.60    6.50
  -7  -5  -6   39.00    6.50
   7  -5   6   36.70    6.20
  -7   5  -6   43.10    7.30
   8  -5   6   15.00    5.70
  -8  -5  -6    7.50    5.70
   8  -5   6    4.50    4.70
  -8  -5  -6   15.60    5.40
  -8   5  -6    7.90    5.70
   9  -5   6   28.00    7.30
  -9  -5  -6   28.10    8.00
  -9  -5  -6   21.50    6.60
  -9   5  -6   27.20    7.30
  -8  -6   6   13.00    6.70
  -8  -6   6   18.90    6.40
   8  -6  -6   16.30    6.00
  -8   6   6    9.80    6.10
   7  -6  -6    7.90    5.50
  -7  -6   6    2.20    4.10
  -7  -6   6    4.50    5.00
  -7   6   6    4.00    5.00
  -6  -6   6  284.67   14.50
  -6  -6   6  303.07   15.70
   6  -6  -6  288.47   13.80
  -6   6   6  290.57   15.10
  -6   6   6  275.97   13.10
  -5  -6   6  250.37   13.30
  -5  -6   6  239.98   12.60
   5  -6  -6  226.48   11.40
  -5   6   6  229.98   12.70
  -5   6   6  230.08   11.40
  -4  -6   6   17.10    4.20
  -4  -6   6   25.50    5.30
   4  -6  -6   21.70    4.50
  -4   6   6   24.80    4.30
  -4   6   6   18.70    4.80
  -3  -6   6   70.09    7.00
  -3  -6   6   76.59    8.00
   3  -6  -6   72.69    6.80
  -3   6   6   63.29    6.00
  -3   6   6   77.89    7.40
   3   6  -6   61.69    6.70
   2  -6  -6   43.00    4.90
  -2  -6   6   48.00    5.50
  -2  -6   6   47.30    5.80
  -2   6   6   53.39    5.20
  -2   6   6   41.70    5.30
   2   6  -6   49.40    5.80
  -1  -6   6  132.19    7.90
   1  -6  -6  132.29    7.10
  -1  -6   6  126.59    7.20
  -1   6   6  145.09    7.40
   1   6  -6  145.49    8.60
  -1   6   6  147.99    7.60
   0  -6  -6    5.40    2.50
   0  -6   6    6.50    2.80
   0  -6   6    3.90    2.30
   0   6   6   10.60    2.80
   0   6   6    9.70    2.80
   0   6  -6   11.40    3.10
   0   6  -6    9.60    2.50
  -1  -6  -6  131.59    7.60
   1  -6   6  128.09    7.90
  -1  -6  -6  129.39    5.90
   1  -6   6  134.89    6.90
  -1   6  -6  169.98    8.80
   1   6   6  139.69    6.30
  -1   6  -6  148.39    7.30
   1   6   6  146.19    7.60
   2  -6   6   49.90    5.00
   2  -6   6   54.79    5.90
  -2  -6  -6   49.20    4.80
  -2  -6  -6   55.69    5.90
   2   6   6   54.59    5.60
  -2   6  -6   44.50    5.40
  -2   6  -6   56.59    5.50
  -3  -6  -6   62.39    6.80
   3  -6   6   54.99    5.50
   3  -6   6   69.89    6.90
  -3  -6  -6   71.79    6.40
  -3   6  -6   70.49    7.10
  -3   6  -6   62.39    6.50
  -4  -6  -6   29.90    4.80
  -4  -6  -6   30.60    5.70
   4  -6   6   25.60    5.40
   4  -6   6   16.30    4.00
  -4   6  -6   27.60    5.20
  -4   6  -6   17.30    4.60
   5  -6   6  237.78   10.90
  -5  -6  -6  260.27   13.40
  -5  -6  -6  207.28   10.80
   5  -6   6  201.58   11.80
  -5   6  -6  235.78   12.60
  -5   6  -6  242.88   12.90
   6  -6   6  305.27   13.00
  -6  -6  -6  288.87   15.40
  -6  -6  -6  283.07   14.10
   6  -6   6  295.77   14.70
  -6  -6  -6  273.17   13.50
  -6   6  -6  310.67   14.80
  -6   6  -6  281.87   14.60
  -7  -6  -6    3.00    4.20
   7  -6   6    6.90    4.90
  -7  -6  -6    9.00    5.60
   7  -6   6    4.70    4.60
  -7   6  -6    1.30    5.00
   8  -6   6   13.30    6.00
  -8  -6  -6   17.50    7.10
  -8  -6  -6   15.40    6.40
  -8   6  -6   -2.10    5.10
  -8  -7   6   -7.30    4.90
  -8  -7   6   -0.20    5.10
   8  -7  -6    3.20    6.00
  -8   7   6    5.30    5.10
  -7  -7   6    1.30    4.10
   7  -7  -6   -3.60    4.10
  -7  -7   6   -2.60    4.80
  -7   7   6   -2.20    5.10
  -6  -7   6   18.10    6.10
  -6  -7   6   17.80    5.10
   6  -7  -6   23.10    5.90
  -6   7   6   16.50    5.50
  -5  -7   6   15.10    5.40
   5  -7  -6   25.50    5.30
  -5  -7   6   17.70    5.30
  -5   7   6   18.60    5.70
  -5   7   6   11.30    4.40
  -4  -7   6    0.30    3.20
   4  -7  -6    2.10    3.50
  -4  -7   6    1.30    3.20
  -4   7   6    4.20    3.90
  -4   7   6    0.10    3.10
  -3  -7   6  125.09    8.60
  -3  -7   6  121.19    9.50
   3  -7  -6   99.49    8.00
   3   7  -6  128.99    9.20
  -3   7   6  116.39    8.00
  -3   7   6  114.39    8.90
  -2  -7   6  135.99    8.40
  -2  -7   6  154.98    9.80
   2  -7  -6  153.28    8.80
  -2   7   6  170.18    9.40
   2   7  -6  157.48   10.10
  -2   7   6  164.18    9.00
  -1  -7   6   57.59    6.70
   1  -7  -6   68.89    6.60
  -1  -7   6   69.89    6.60
  -1   7   6   75.29    6.30
  -1   7   6   78.29    6.90
   1   7  -6   86.69    7.90
   0  -7   6   -2.70    2.30
   0  -7   6    1.40    2.30
   0  -7  -6    3.50    2.50
   0   7   6    1.60    2.40
   0   7  -6    0.80    2.30
   0   7   6    2.30    2.60
   1  -7   6   74.49    6.40
   1  -7   6   66.79    7.00
  -1  -7  -6   82.89    6.80
  -1   7  -6   82.79    7.80
   1   7   6   67.29    6.50
  -1   7  -6   70.99    5.90
   2  -7   6  145.89    9.60
   2  -7   6  147.29    8.10
  -2  -7  -6  149.79    9.40
  -2  -7  -6  147.09    9.10
   2   7   6  148.49    8.90
  -2   7  -6  153.28    9.80
  -2   7  -6  166.28    8.90
   3  -7   6  117.09    9.00
  -3  -7  -6  110.99    7.60
  -3  -7  -6  113.49    9.10
   3  -7   6  103.59    7.20
  -3   7  -6  105.79    8.60
  -3   7  -6   97.89    8.10
  -4  -7  -6    7.60    3.30
   4  -7   6    6.10    3.70
   4  -7   6   -0.70    3.40
  -4  -7  -6   -2.80    3.60
  -4   7  -6    3.50    3.90
  -4   7  -6    7.60    4.10
  -5  -7  -6   10.60    4.90
   5  -7   6   12.30    4.10
  -5  -7  -6   15.80    4.90
   5  -7   6   19.20    5.20
  -5   7  -6   16.20    5.10
  -5   7  -6   16.90    5.00
  -6  -7  -6   18.30    5.60
  -6  -7  -6   14.10    6.10
   6  -7   6   17.60    5.90
  -6   7  -6   25.80    6.60
  -7  -7  -6   -5.10    4.80
   7  -7   6   -3.90    4.40
  -7  -7  -6   -0.40    4.10
  -7   7  -6   -2.20    5.00
   8  -7   6   -2.40    5.30
  -8  -7  -6    2.80    5.30
  -8  -7  -6    1.80    6.00
  -8   7  -6    1.00    6.00
   7  -8  -6    6.40    5.90
  -7  -8   6   16.70    6.70
  -7  -8   6    9.90    6.00
  -7   8   6    6.20    6.10
   6  -8  -6   98.59   10.30
  -6  -8   6   96.89   11.80
  -6  -8   6   93.89   10.50
  -6   8   6  102.99   10.90
  -5  -8   6    0.90    3.80
  -5  -8   6    2.90    4.40
   5  -8  -6    9.20    4.70
  -5   8   6   -1.20    4.60
  -4  -8   6   47.30    6.90
  -4  -8   6   50.19    8.10
   4  -8  -6   53.99    7.60
  -4   8   6   51.69    7.30
   4   8  -6   60.79    9.40
   3  -8  -6    1.50    3.60
  -3  -8   6    1.20    3.60
  -3  -8   6    0.90    3.70
  -3   8   6    0.60    3.70
   3   8  -6    0.50    3.90
  -3   8   6   -0.70    3.10
   2  -8  -6   85.89    8.40
  -2  -8   6   99.89    8.00
  -2  -8   6  100.09    9.60
  -2   8   6  101.89    8.50
   2   8  -6   86.19    9.10
  -2   8   6  111.19    8.80
   1  -8  -6   31.90    5.30
  -1  -8   6   34.60    6.00
  -1  -8   6   43.10    5.90
   1   8  -6   35.10    6.30
  -1   8   6   31.80    5.50
  -1   8   6   49.80    7.20
   0  -8   6    7.00    3.40
   0  -8   6    5.20    3.50
   0  -8  -6    3.20    3.20
   0   8   6    4.90    3.50
   0   8  -6    5.70    4.00
   1  -8   6   42.40    6.10
  -1  -8  -6   39.30    5.90
   1  -8   6   40.10    5.10
  -1   8  -6   38.20    6.50
   1   8   6   36.30    5.40
  -2  -8  -6   91.89    9.00
   2  -8   6  100.29    9.50
   2  -8   6   98.69    7.50
  -2   8  -6  100.49    8.40
  -2   8  -6   95.99    9.10
   2   8   6   82.39    7.90
  -3  -8  -6    0.00    3.80
   3  -8   6    1.50    3.40
   3  -8   6   11.60    4.10
  -3   8  -6    7.10    4.30
  -3   8  -6   -0.50    3.30
  -4  -8  -6   44.20    7.60
  -4  -8  -6   27.30    6.30
   4  -8   6   38.90    6.60
  -4   8  -6   48.30    7.40
  -4   8  -6   53.79    7.30
  -5  -8  -6   -1.10    4.70
  -5  -8  -6    1.10    3.60
   5  -8   6    4.80    4.30
  -5   8  -6    0.60    4.80
  -6  -8  -6  103.99   10.70
   6  -8   6   98.59   10.90
  -6  -8  -6  110.29   11.90
  -6   8  -6   91.69   10.70
  -7  -8  -6    3.80    5.40
  -7  -8  -6    5.20    6.10
   7  -8   6    4.70    5.70
  -7   8  -6    6.30    6.40
  -6  -9   6    9.10    5.40
  -6  -9   6    0.00    5.50
   6  -9  -6    2.80    6.20
  -6   9   6   -0.80    5.30
  -5  -9   6    2.20    5.50
  -5  -9   6   16.70    5.40
   5  -9  -6    8.00    5.20
  -5   9   6   25.10    7.10
  -4  -9   6   58.69    8.20
  -4  -9   6   49.10    8.30
   4  -9  -6   55.99    8.20
  -4   9   6   55.89    8.00
  -3  -9   6    3.70    4.00
   3  -9  -6    7.00    4.70
  -3  -9   6    8.80    4.70
  -3   9   6   12.40    5.00
  -2  -9   6   52.39    8.00
   2  -9  -6   78.79    8.60
  -2  -9   6   66.69    7.70
   2   9  -6   90.39   11.30
   1  -9  -6   28.40    5.70
  -1  -9   6   36.10    6.10
  -1  -9   6   27.50    5.50
   1   9  -6   19.80    5.40
   0  -9   6   -3.20    3.20
   0  -9  -6    3.90    3.50
   0  -9   6    0.50    3.10
   0   9   6   -0.90    3.90
   0   9  -6    4.70    4.50
   1  -9   6   33.30    5.50
  -1  -9  -6    7.50    4.20
   1  -9   6   31.50    6.20
   1   9   6   36.50    6.20
  -1   9  -6   22.40    5.90
   2  -9   6   58.59    8.20
  -2  -9  -6   60.69    8.00
   2   9   6   67.69    8.10
  -2   9  -6   60.59    8.20
   3  -9   6    0.60    4.30
  -3  -9  -6   -0.10    4.20
  -4  -9  -6   55.59    8.60
   4  -9   6   41.80    8.00
  -4   9  -6   58.89    8.20
   5  -9   6   10.70    5.70
  -5  -9  -6    2.00    5.70
  -5   9  -6   18.40    6.60
   6  -9   6    6.50    5.90
  -6  -9  -6   -6.40    5.40
  -6   9  -6    3.70    5.80
  -5 -10   6   27.60    6.90
  -5 -10   6   29.50    7.80
   5 -10  -6   36.60    7.80
  -5  10   6   35.60    7.90
  -4 -10   6   26.60    6.80
   4 -10  -6   28.70    7.50
  -4 -10   6   23.80    7.00
  -4  10   6   33.30    7.70
  -3 -10   6    1.20    4.20
  -3 -10   6   10.60    5.40
   3 -10  -6    0.60    4.50
  -2 -10   6   40.30    6.90
   2 -10  -6   41.70    7.50
  -2 -10   6   42.10    7.90
  -1 -10   6    6.00    5.10
  -1 -10   6    0.80    3.90
   1 -10  -6    8.20    4.50
   0 -10  -6  144.09   11.30
   0 -10   6  117.59   11.20
   1 -10   6    2.70    4.20
  -1 -10  -6   11.50    5.40
   2 -10   6   40.80    7.60
  -2 -10  -6   46.50    8.20
  -3 -10  -6    9.70    5.50
   3 -10   6   -6.10    3.80
  -4 -10  -6   18.10    6.80
   4 -10   6   10.50    6.00
  -5 -10  -6   35.80    8.70
   5 -10   6   24.70    7.80
  -5  10  -6   39.60    8.50
  -3 -11   6    9.40    6.60
   3 -11  -6   16.50    6.30
  -2 -11   6    1.70    4.90
   2 -11  -6    7.50    5.30
  -1 -11   6   90.09   10.90
   1 -11  -6   82.89   10.10
   0 -11  -6   -2.00    4.50
   0 -11   6    2.90    5.20
   1 -11   6   87.29   10.90
  -1 -11  -6   83.99   10.20
  -2 -11  -6    9.30    5.50
   2 -11   6    0.40    5.00
  -3 -11  -6   27.10    7.60
   3 -11   6   11.50    6.40
 -10   0   7   -2.10    5.20
 -10   0   7    4.80    5.30
  -9   0   7   -0.60    3.70
  -9   0   7    3.20    4.50
  -8   0   7    2.10    3.60
  -8   0   7    2.80    3.70
  -8   0   7    3.90    3.90
  -7   0   7    0.10    3.00
  -7   0   7   -0.40    2.70
  -7   0   7    1.50    3.10
  -7   0   7   -2.50    2.80
  -6   0   7   -0.50    2.10
  -6   0   7    2.00    2.60
  -6   0   7    2.10    2.30
  -6   0   7   -1.40    2.30
  -6   0   7   -0.60    2.00
  -5   0   7   24.40    3.60
  -5   0   7   25.90    3.80
  -5   0   7   19.30    3.40
  -5   0   7   32.90    3.70
  -5   0   7   27.30    4.20
  -4   0   7    7.20    2.30
  -4   0   7   14.40    2.80
  -4   0   7   18.10    2.90
  -4   0   7   10.60    2.50
  -4   0   7   11.10    2.40
  -3   0   7   80.19    4.40
  -3   0   7   78.79    4.40
  -3   0   7   83.59    4.60
  -3   0   7   89.69    4.40
  -3   0   7   86.49    4.30
  -2   0   7   21.70    2.50
  -2   0   7   26.00    2.40
  -2   0   7   25.80    2.30
  -2   0   7   24.10    2.00
  -1   0   7   76.79    3.60
  -1   0   7   80.69    2.70
   1   0  -7   72.29    3.50
  -1   0   7   77.39    3.10
   0   0   7   -1.30    0.70
   0   0  -7   -1.20    0.50
   0   0  -7    2.00    1.20
   0   0   7    1.00    0.60
   0   0   7    1.90    1.00
  -1   0  -7   74.89    3.60
   1   0   7   88.59    3.00
  -1   0  -7   79.99    3.10
   1   0   7   75.49    3.40
   1   0   7   83.49    2.90
   2   0   7   23.20    2.60
  -2   0  -7   21.20    2.50
  -2   0  -7   26.60    2.60
  -3   0  -7   83.49    4.90
   3   0   7   87.09    4.80
  -3   0  -7   87.79    4.80
   4   0   7   12.10    2.60
  -4   0  -7   13.90    2.80
  -4   0  -7   12.20    2.70
   5   0   7   25.20    4.00
  -5   0  -7   28.30    4.10
  -5   0  -7   25.30    4.00
  -6   0  -7    0.20    2.70
   6   0   7    0.40    2.80
  -6   0  -7   -0.20    2.40
  -7   0  -7   -0.20    3.30
  -7   0  -7    1.30    3.30
  -7   0  -7    3.30    3.10
   7   0   7    5.50    3.60
  -8   0  -7    7.30    4.50
  -8   0  -7   -0.40    4.10
   8   0   7    3.20    4.10
  -8   0  -7    5.10    4.40
  -9   0  -7    1.80    3.90
 -10   0  -7    1.20    6.00
 -10  -1   7   12.90    6.30
 -10  -1   7   15.10    6.50
 -10   1   7   16.80    6.70
  -9  -1   7   24.60    6.50
  -9  -1   7   15.40    5.40
  -9   1   7    8.20    4.70
  -9   1   7   22.40    6.90
  -8  -1   7    8.20    4.60
  -8  -1   7   12.10    4.80
  -8  -1   7    4.40    4.20
  -8   1   7    7.70    4.70
  -8   1   7    6.10    4.20
  -8   1   7    9.90    4.50
  -8   1   7    1.50    3.90
  -7  -1   7    4.20    3.40
  -7  -1   7    4.10    3.80
  -7  -1   7    4.70    3.60
  -7   1   7    1.30    3.50
  -7   1   7    1.70    3.30
  -7   1   7    4.30    3.40
  -6  -1   7   54.79    5.60
  -6  -1   7   59.49    6.70
  -6  -1   7   48.20    5.90
  -6  -1   7   57.79    5.30
  -6  -1   7   56.99    6.30
  -6   1   7   58.89    5.20
  -6   1   7   67.99    6.60
  -6   1   7   56.89    6.30
  -6   1   7   59.89    6.60
  -5  -1   7  104.39    6.70
  -5  -1   7  105.29    6.20
  -5  -1   7   99.99    5.70
  -5  -1   7  107.59    6.70
  -5  -1   7   87.69    6.30
  -5   1   7  101.49    6.70
  -5   1   7   94.59    6.10
  -5   1   7   97.59    5.50
  -4  -1   7  308.07   10.00
  -4  -1   7  305.87   10.20
  -4  -1   7  313.17   10.10
  -4  -1   7  319.27    9.20
  -4   1   7  330.07    9.50
  -4   1   7  313.67    9.00
  -4   1   7  317.97    9.60
  -4   1   7  326.17   10.60
  -3  -1   7   84.09    4.30
  -3  -1   7   85.69    4.90
  -3  -1   7   79.49    4.70
  -3   1   7   86.69    5.20
  -3   1   7   77.29    3.90
  -3   1   7   86.49    4.30
  -3   1   7   81.99    4.60
  -2  -1   7  178.68    6.00
  -2  -1   7  168.88    5.60
  -2   1   7  171.68    5.90
  -2   1   7  173.38    4.80
   2   1  -7  189.88    5.30
  -2   1   7  179.08    4.70
   1  -1  -7  559.74   10.90
  -1  -1   7  567.44    9.90
  -1  -1   7  563.24   10.60
  -1   1   7  576.94    7.60
  -1   1   7  559.54   10.90
   1   1  -7  586.34   10.20
   1   1  -7  554.14    9.90
   0  -1   7    9.20    1.30
   0  -1  -7    9.70    1.70
   0   1   7   10.20    1.60
   0   1  -7   14.60    1.60
   0   1   7    9.70    1.10
   1  -1   7  548.95   10.50
   1  -1   7  575.14   10.10
  -1  -1  -7  577.44    9.30
  -1  -1  -7  572.64    9.10
  -1  -1  -7  555.74   10.50
   1   1   7  584.14    9.60
  -1   1  -7  567.04   10.40
  -1   1  -7  557.14   10.90
   1   1   7  569.54    9.10
   1   1   7  564.84    9.70
   2  -1   7  181.18    6.00
   2  -1   7  175.18    5.90
  -2  -1  -7  173.88    5.50
  -2  -1  -7  179.58    5.80
  -2  -1  -7  185.68    5.90
   2   1   7  172.28    5.60
  -2   1  -7  177.18    6.30
  -2   1  -7  186.88    6.20
   2   1   7  173.08    4.40
  -3  -1  -7   83.69    4.90
   3  -1   7   90.49    5.10
   3  -1   7   81.69    4.80
  -3  -1  -7   88.59    4.80
  -3  -1  -7   81.59    4.60
   3   1   7   75.89    4.60
  -3   1  -7   85.99    4.90
  -3   1  -7   89.89    5.40
  -4  -1  -7  317.47   10.40
  -4  -1  -7  306.07    9.40
   4  -1   7  320.47   10.40
  -4  -1  -7  319.67   10.60
   4  -1   7  324.17   10.30
  -4   1  -7  330.77   10.70
  -4   1  -7  310.97   10.70
   4   1   7  316.87   10.10
  -5  -1  -7   88.89    6.20
  -5  -1  -7   81.79    6.40
  -5  -1  -7  101.29    6.10
   5  -1   7   90.29    6.10
  -5   1  -7  100.49    6.80
  -5   1  -7  106.79    7.10
   5   1   7   99.79    6.50
  -6  -1  -7   61.99    6.70
   6  -1   7   71.09    6.90
  -6  -1  -7   56.89    5.90
  -6  -1  -7   50.69    6.40
   6   1   7   50.99    5.90
  -6   1  -7   67.99    6.90
  -6   1  -7   62.39    6.70
   7  -1   7    8.90    3.60
  -7  -1  -7   10.70    4.20
  -7  -1  -7    9.60    3.90
  -7  -1  -7    7.10    3.40
   7   1   7    5.70    3.80
  -7   1  -7   10.60    4.00
  -7   1  -7    0.00    3.50
  -8  -1  -7   16.40    6.10
   8  -1   7   13.90    4.90
  -8  -1  -7    5.60    4.70
  -8   1  -7    8.90    5.20
  -9  -1  -7   19.50    5.90
   9  -1   7   12.60    5.40
  -9   1  -7   13.30    5.90
  -9   1  -7   10.30    5.70
 -10  -1  -7   12.50    7.10
 -10   1  -7   15.10    6.70
 -10  -2   7   81.39   11.70
 -10  -2   7   57.79    9.30
 -10   2   7   76.09   10.90
  -9  -2   7   43.50    8.50
  -9  -2   7   54.09    8.30
  -9   2   7   53.99    8.60
  -9   2   7   67.59    9.40
  -8  -2   7   39.00    6.70
  -8  -2   7   39.30    6.60
  -8  -2   7   57.29    8.20
  -8   2   7   47.80    7.40
  -8   2   7   38.70    6.90
  -8   2   7   38.80    6.60
  -7  -2   7   27.80    5.80
  -7  -2   7   33.70    6.00
  -7  -2   7   21.50    4.90
  -7   2   7   29.80    5.50
  -7   2   7   22.10    4.60
  -6  -2   7  276.97   12.80
  -6  -2   7  274.27   11.70
  -6  -2   7  306.77   12.70
  -6   2   7  293.57   10.40
  -6   2   7  283.47   12.40
  -6   2   7  272.37   11.40
  -5  -2   7   65.19    6.50
  -5  -2   7   69.39    4.80
  -5  -2   7   82.69    6.40
  -5  -2   7   86.19    6.30
  -5   2   7   78.99    5.20
  -5   2   7   71.29    6.80
  -5   2   7   70.99    5.50
  -4  -2   7   19.20    3.60
  -4  -2   7   18.90    2.60
  -4  -2   7   16.80    3.20
  -4   2   7   21.20    3.10
  -4   2   7   22.20    3.30
  -4   2   7   11.50    3.20
  -3  -2   7   36.00    4.00
   3  -2  -7   33.60    3.40
  -3  -2   7   20.30    3.30
  -3   2   7   28.40    3.00
  -3   2   7   32.80    4.00
  -3   2   7   20.10    3.00
  -2  -2   7   80.09    4.50
   2  -2  -7   80.49    3.60
  -2  -2   7   81.09    4.50
  -2   2   7   80.79    2.70
   2   2  -7   89.99    4.70
  -2   2   7   86.99    3.60
  -2   2   7   87.59    4.50
   2   2  -7   78.99    3.30
  -1  -2   7  239.98    6.90
  -1  -2   7  226.48    6.80
   1  -2  -7  225.78    4.70
   1  -2  -7  228.88    5.10
   1   2  -7  240.08    5.70
   1   2  -7  229.08    6.80
  -1   2   7  224.78    4.70
  -1   2   7  225.78    7.00
   0  -2   7  586.74   11.20
   0  -2  -7  576.84    9.10
   0  -2  -7  602.44    8.60
   0  -2   7  566.54   10.90
   0  -2  -7  592.84   11.20
   0   2  -7  589.04   10.70
   0   2   7  614.44   11.70
   0   2  -7  591.94   11.50
   0   2   7  603.34    8.70
  -1  -2  -7  229.18    6.00
  -1  -2  -7  222.68    6.20
   1  -2   7  226.08    6.60
   1  -2   7  211.18    6.50
   1   2   7  232.98    6.50
  -1   2  -7  234.88    6.90
   1   2   7  230.18    5.50
  -1   2  -7  216.38    6.60
   2  -2   7   85.59    4.40
   2  -2   7   82.39    4.60
  -2  -2  -7   79.29    3.90
  -2  -2  -7   83.29    4.40
  -2  -2  -7   89.39    4.20
  -2   2  -7   68.79    4.20
   2   2   7   80.39    4.00
  -2   2  -7   80.79    4.70
   3  -2   7   25.90    3.30
  -3  -2  -7   28.50    3.60
  -3  -2  -7   26.00    3.30
   3  -2   7   31.10    3.90
  -3  -2  -7   26.00    3.00
  -3   2  -7   23.30    3.10
  -3   2  -7   29.60    3.90
   3   2   7   30.30    3.60
  -4  -2  -7   25.30    3.70
   4  -2   7   10.10    2.90
  -4  -2  -7   15.50    3.40
  -4  -2  -7   21.80    3.10
   4  -2   7   17.30    3.20
  -4   2  -7   23.90    4.00
   4   2   7   17.60    3.30
  -4   2  -7   18.30    3.30
   5  -2   7   74.69    7.00
  -5  -2  -7   72.69    6.80
  -5  -2  -7   78.59    5.50
  -5  -2  -7   84.19    6.20
   5  -2   7   69.99    6.20
   5   2   7   80.59    6.90
  -5   2  -7   66.89    6.60
  -5   2  -7   74.99    6.20
  -6  -2  -7  291.97   10.80
  -6  -2  -7  305.67   12.60
   6  -2   7  296.57   12.10
  -6  -2  -7  293.37   13.00
  -6   2  -7  274.57   12.30
  -6   2  -7  285.67   12.50
   7  -2   7   37.70    6.20
  -7  -2  -7   19.80    5.00
  -7  -2  -7   21.00    5.00
  -7   2  -7   26.50    5.70
  -7   2  -7   31.20    5.80
  -8  -2  -7   66.49    9.10
   8  -2   7   46.50    7.10
  -8   2  -7   39.70    7.20
   9  -2   7   51.09    8.40
  -9  -2  -7   52.29    8.90
  -9   2  -7   56.39    8.90
  10  -2   7   53.19    9.10
 -10  -2  -7   66.89   10.80
 -10   2  -7   65.39   10.70
 -10   2  -7   60.69   10.10
  -9  -3   7    9.80    4.90
  -9  -3   7    6.40    5.60
  -9   3   7    3.00    5.90
  -9   3   7   12.90    5.60
  -8  -3   7   26.80    6.50
  -8  -3   7   18.70    5.60
  -8   3   7   10.60    4.60
  -8   3   7    8.90    5.00
  -7  -3   7   26.30    5.30
  -7  -3   7   21.30    5.10
  -7  -3   7   21.30    5.10
  -7   3   7   28.60    5.30
  -7   3   7   21.00    5.40
  -6  -3   7    3.80    3.30
  -6  -3   7    3.00    3.20
  -6  -3   7    1.80    2.70
  -6   3   7    6.00    3.40
  -6   3   7    6.60    2.70
  -6   3   7    3.30    3.00
  -5  -3   7    9.00    3.20
  -5  -3   7    9.80    3.40
   5  -3  -7   10.20    3.30
  -5   3   7   12.30    3.50
  -5   3   7    9.00    3.00
  -5   3   7   15.40    3.20
  -4  -3   7  276.37   10.50
   4  -3  -7  266.97    9.50
  -4  -3   7  294.97   11.00
  -4   3   7  305.17   10.00
  -4   3   7  274.17    9.30
  -4   3   7  299.77   11.50
  -3  -3   7    8.60    2.80
  -3  -3   7    6.60    2.30
   3  -3  -7    2.80    2.00
  -3   3   7    3.80    2.10
  -3   3   7   10.10    2.80
  -3   3   7   11.10    2.30
   2  -3  -7    6.60    1.80
  -2  -3   7    6.10    1.90
  -2  -3   7    3.50    2.10
  -2   3   7    5.60    1.60
  -2   3   7    5.30    1.90
   2   3  -7    4.50    1.30
   2   3  -7    4.30    2.00
  -2   3   7    8.10    2.30
   1  -3  -7   83.89    3.80
  -1  -3   7   90.99    4.90
  -1  -3   7   88.59    5.00
   1   3  -7   86.49    4.80
  -1   3   7   86.69    4.90
   1   3  -7   96.79    3.60
  -1   3   7   90.69    3.60
   0  -3  -7   10.00    1.70
   0  -3  -7    6.50    1.80
   0  -3  -7   10.00    1.30
   0  -3   7   10.20    2.20
   0  -3   7   12.60    2.10
   0   3   7   11.50    2.30
   0   3   7   11.50    1.60
   0   3  -7   11.50    2.00
   0   3  -7   12.20    2.20
  -1  -3  -7   88.19    4.40
   1  -3   7   89.49    4.90
   1  -3   7   91.39    4.60
  -1  -3  -7   87.89    4.00
  -1   3  -7   87.99    5.00
  -1   3  -7   85.59    4.60
   1   3   7   88.89    4.60
  -2  -3  -7    4.70    2.20
   2  -3   7    7.50    2.20
   2  -3   7    5.00    1.90
  -2  -3  -7    4.10    1.80
  -2   3  -7    2.40    1.70
  -2   3  -7    7.90    2.50
   3  -3   7   10.90    2.60
  -3  -3  -7    5.60    2.50
  -3  -3  -7   10.40    2.10
   3  -3   7    5.10    2.40
  -3  -3  -7    9.20    2.30
  -3   3  -7    8.00    2.60
  -3   3  -7    8.20    2.50
  -4  -3  -7  300.27   11.10
  -4  -3  -7  272.87   10.00
   4  -3   7  280.47    9.90
   4  -3   7  294.77   11.00
  -4  -3  -7  282.97    8.50
  -4   3  -7  263.97   10.30
  -4   3  -7  295.87   11.10
  -5  -3  -7    4.30    2.90
  -5  -3  -7   11.30    3.10
   5  -3   7    9.30    3.30
   5  -3   7    5.40    2.70
  -5   3  -7    9.60    3.60
  -5   3  -7   15.10    3.40
  -6  -3  -7    8.10    3.70
  -6  -3  -7    7.60    3.40
   6  -3   7    5.50    3.30
   6  -3   7    5.30    3.30
  -6   3  -7    2.20    3.10
  -6   3  -7    2.50    3.60
  -7  -3  -7   38.40    6.50
  -7  -3  -7   20.80    5.00
   7  -3   7   25.90    5.50
   7  -3   7   15.50    5.00
  -7   3  -7   17.40    5.60
  -7   3  -7   21.80    5.00
   8  -3   7   32.30    6.40
  -8  -3  -7   16.40    5.90
  -8   3  -7    7.30    5.30
  -9  -3  -7    1.40    5.40
   9  -3   7   -2.80    4.80
  -9   3  -7   -2.60    5.00
  -9  -4   7    5.40    5.20
  -9  -4   7    1.30    5.10
  -9   4   7   -0.20    5.50
  -8  -4   7   13.20    4.70
  -8  -4   7    8.10    4.70
  -8   4   7   17.90    5.50
  -8   4   7    5.90    5.10
  -7  -4   7    4.00    3.70
  -7  -4   7    8.60    4.60
  -7  -4   7    1.60    3.60
  -7   4   7    0.50    4.20
  -7   4   7    2.40    3.50
   6  -4  -7  163.48    9.90
  -6  -4   7  150.18   10.10
  -6  -4   7  175.98   11.20
  -6   4   7  149.39   10.40
  -6   4   7  166.38    8.90
  -6   4   7  148.19    9.10
  -5  -4   7   37.40    5.80
  -5  -4   7   29.80    5.20
   5  -4  -7   35.00    5.20
  -5   4   7   34.80    4.70
  -5   4   7   27.50    4.10
  -5   4   7   33.00    5.60
   4  -4  -7   33.50    4.40
  -4  -4   7   33.10    5.20
  -4  -4   7   24.90    4.20
  -4   4   7   23.10    4.70
  -4   4   7   31.20    4.30
  -4   4   7   32.30    4.20
  -3  -4   7    4.70    2.20
  -3  -4   7    3.80    2.30
   3  -4  -7    1.80    1.70
  -3   4   7    3.60    1.90
  -3   4   7    3.90    2.20
   3   4  -7    2.30    2.20
  -3   4   7    0.10    2.00
  -2  -4   7  129.79    7.20
   2  -4  -7  117.89    3.40
  -2  -4   7  122.59    6.50
   2  -4  -7  111.79    5.60
   2   4  -7  135.09    7.10
   2   4  -7  122.69    3.70
  -2   4   7  130.89    6.80
  -2   4   7  122.09    6.80
  -2   4   7  114.79    5.40
  -1  -4   7   23.00    3.30
  -1  -4   7   15.20    3.20
   1  -4  -7   24.30    3.10
  -1   4   7   23.90    2.80
  -1   4   7   26.20    3.40
   1   4  -7   26.70    3.70
   1   4  -7   25.70    2.50
  -1   4   7   29.50    3.70
   0  -4   7   -1.90    1.50
   0  -4  -7   -0.80    0.90
   0  -4  -7   -1.30    1.50
   0  -4   7   -5.50    1.60
   0   4  -7    0.20    1.60
   0   4   7    1.40    1.60
   0   4   7    0.30    1.30
   0   4  -7    0.40    2.00
  -1  -4  -7   29.00    2.90
  -1  -4  -7   24.50    3.50
   1  -4   7   23.20    3.30
   1  -4   7   27.90    3.70
  -1  -4  -7   21.70    2.40
  -1   4  -7   28.60    3.50
   1   4   7   22.50    2.80
  -1   4  -7   20.10    3.20
  -2  -4  -7  124.39    5.50
  -2  -4  -7  116.69    4.90
   2  -4   7  125.79    6.80
  -2  -4  -7  112.59    6.50
   2  -4   7  126.59    6.20
  -2   4  -7  128.59    6.80
  -2   4  -7  126.39    6.90
  -3  -4  -7   -0.30    2.10
   3  -4   7    1.40    1.80
   3  -4   7    7.50    2.60
  -3  -4  -7    2.80    1.80
  -3   4  -7    5.60    2.40
  -3   4  -7    4.70    2.20
  -4  -4  -7   31.60    4.40
   4  -4   7   27.60    4.60
   4  -4   7   30.50    4.20
  -4  -4  -7   39.50    5.30
  -4   4  -7   26.90    4.50
  -4   4  -7   29.50    4.40
   5  -4   7   42.80    5.30
  -5  -4  -7   25.20    5.00
  -5  -4  -7   32.00    4.80
   5  -4   7   27.20    4.90
  -5   4  -7   25.10    4.90
  -5   4  -7   33.50    5.10
   6  -4   7  146.49    9.00
  -6  -4  -7  168.28   10.30
  -6  -4  -7  161.88   10.40
   6  -4   7  148.69    9.80
  -6   4  -7  157.28   10.10
  -6   4  -7  178.28   10.70
  -7  -4  -7   -2.00    3.40
   7  -4   7    0.90    3.90
   7  -4   7    0.10    3.20
  -7  -4  -7   -1.10    4.10
  -7   4  -7    4.20    4.30
  -7   4  -7    3.40    3.80
   8  -4   7   14.70    5.50
  -8  -4  -7   20.70    6.50
  -8   4  -7   20.60    6.30
  -9  -4  -7    1.60    5.50
  -9  -4  -7    3.50    4.60
   9  -4   7    4.70    5.50
  -9   4  -7    5.70    5.90
  -9  -5   7   11.30    6.50
  -9  -5   7   19.90    7.40
  -9   5   7   10.90    6.20
  -8  -5   7   69.09   10.10
  -8  -5   7   55.99    8.20
  -8   5   7   54.49    8.60
  -7  -5   7   28.40    5.80
   7  -5  -7   39.40    6.70
  -7  -5   7   49.20    8.20
  -7   5   7   24.00    5.60
  -7   5   7   43.10    7.10
   6  -5  -7    1.10    3.60
  -6  -5   7    0.20    3.60
  -6  -5   7    1.10    3.20
  -6   5   7    3.70    3.30
  -6   5   7   -1.30    3.10
  -6   5   7    2.50    3.80
  -5  -5   7  528.85   17.30
  -5  -5   7  486.15   17.60
   5  -5  -7  495.65   15.70
  -5   5   7  508.55   15.70
  -5   5   7  481.55   17.50
  -5   5   7  516.35   15.70
  -4  -5   7    8.40    3.20
   4  -5  -7   14.40    3.40
  -4  -5   7   13.80    3.90
  -4   5   7    7.70    2.60
  -4   5   7   13.90    3.60
  -4   5   7   11.10    3.80
   3  -5  -7  360.56   11.50
  -3  -5   7  402.46   13.30
  -3  -5   7  346.07   13.40
  -3   5   7  418.26   13.20
   3   5  -7  377.16   13.40
  -3   5   7  376.66   13.40
  -3   5   7  375.16   11.40
   2  -5  -7    0.90    2.00
  -2  -5   7    2.70    2.60
  -2  -5   7    4.10    2.40
   2   5  -7    4.60    2.80
  -2   5   7    5.40    2.20
  -2   5   7    9.50    2.90
  -2   5   7    3.90    2.60
  -1  -5   7  395.46   11.90
  -1  -5   7  398.26   12.70
   1  -5  -7  423.06   11.40
   1   5  -7  411.86    8.90
   1   5  -7  456.35   13.80
  -1   5   7  453.85   12.80
  -1   5   7  440.66   11.40
   0  -5   7   32.70    4.00
   0  -5   7   32.10    4.30
   0  -5  -7   25.20    2.40
   0  -5  -7   29.20    3.70
   0   5   7   25.40    3.30
   0   5  -7   32.60    3.30
   0   5  -7   28.30    4.10
  -1  -5  -7  426.76    9.80
  -1  -5  -7  410.46   12.00
   1  -5   7  415.86   11.60
   1  -5   7  413.36   12.80
   1   5   7  439.36   11.70
  -1   5  -7  408.46   12.80
  -1   5  -7  411.46   11.20
  -2  -5  -7    9.60    3.00
  -2  -5  -7    4.50    1.70
   2  -5   7    7.90    2.90
  -2  -5  -7    6.30    2.20
   2  -5   7    4.00    2.30
  -2   5  -7    5.40    2.60
  -2   5  -7    6.30    2.40
   3  -5   7  356.66   12.90
  -3  -5  -7  361.56   11.30
  -3  -5  -7  377.66   13.00
   3  -5   7  374.76   11.90
  -3   5  -7  371.16   13.00
  -3   5  -7  361.86   12.40
  -4  -5  -7    9.80    3.60
   4  -5   7   16.90    3.70
   4  -5   7    7.00    2.90
  -4  -5  -7   11.90    3.30
  -4   5  -7   17.20    3.90
  -4   5  -7   16.20    4.00
  -5  -5  -7  490.15   16.20
   5  -5   7  509.15   17.20
  -5  -5  -7  486.25   15.70
  -5  -5  -7  506.95   17.70
   5  -5   7  498.15   15.20
  -5   5  -7  497.95   17.10
  -5   5  -7  509.15   17.30
   6  -5   7    5.50    3.50
  -6  -5  -7   -3.20    2.80
  -6  -5  -7    5.70    3.50
  -6  -5  -7    4.90    4.20
   6  -5   7   -0.10    3.30
  -6   5  -7    1.90    4.30
  -6   5  -7    4.00    3.10
  -7  -5  -7   31.70    6.60
   7  -5   7   33.40    6.60
   7  -5   7   40.20    6.50
  -7  -5  -7   38.90    6.90
  -7  -5  -7   42.40    8.00
  -7   5  -7   37.90    7.20
  -8  -5  -7   39.40    8.00
   8  -5   7   80.59    9.30
  -8  -5  -7   62.99    8.80
   8  -5   7   81.09   10.10
  -8   5  -7   55.79    9.00
   9  -5   7   19.50    6.90
  -9  -5  -7   14.80    7.50
  -9  -5  -7   23.60    6.70
  -9   5  -7   17.10    7.40
   8  -6  -7   39.20    7.80
  -8  -6   7   28.90    7.70
  -8  -6   7   28.00    7.10
  -8   6   7   46.30    8.60
   7  -6  -7   -2.30    3.80
  -7  -6   7    4.10    4.50
  -7  -6   7   -5.60    4.20
  -7   6   7   -4.00    4.50
  -6  -6   7   71.99    9.20
   6  -6  -7   73.79    8.40
  -6  -6   7   76.89    9.20
  -6   6   7   68.29    8.50
  -5  -6   7  102.09    9.60
   5  -6  -7   85.59    8.30
  -5  -6   7  103.09   10.10
  -5   6   7   81.19    7.80
  -5   6   7  100.99    9.60
  -4  -6   7   71.59    7.50
  -4  -6   7   91.59    9.10
   4  -6  -7   67.79    6.80
  -4   6   7   82.69    6.70
  -4   6   7   83.19    8.50
  -3  -6   7   38.40    5.30
  -3  -6   7   31.10    5.30
   3  -6  -7   33.60    4.70
  -3   6   7   34.20    5.40
   3   6  -7   41.00    5.60
  -3   6   7   34.90    4.70
  -2  -6   7   11.80    3.90
  -2  -6   7   15.00    3.40
   2  -6  -7   15.70    3.40
  -2   6   7   15.10    3.30
   2   6  -7    9.20    3.30
  -2   6   7   14.70    3.70
  -1  -6   7    6.60    2.60
  -1  -6   7    4.10    2.70
   1  -6  -7   11.00    2.90
  -1   6   7    2.90    2.10
  -1   6   7    0.90    2.30
   1   6  -7    5.70    2.70
   0  -6   7  226.58    9.00
   0  -6  -7  238.88    9.50
   0  -6   7  235.78   10.10
   0   6   7  250.07    9.20
   0   6  -7  241.48    8.00
   0   6  -7  247.68   11.00
   0   6   7  229.68    9.00
   1  -6   7    3.80    2.80
  -1  -6  -7    0.60    1.80
   1  -6   7    0.40    2.10
  -1  -6  -7    0.20    2.30
  -1   6  -7    3.90    2.40
  -1   6  -7    4.40    2.40
   1   6   7   -0.50    2.30
   1   6   7    6.40    2.20
   2  -6   7   10.60    3.00
  -2  -6  -7   12.50    3.60
   2  -6   7   16.40    3.80
  -2  -6  -7   12.60    2.90
  -2   6  -7   13.00    3.70
  -2   6  -7   11.90    3.30
   2   6   7   10.80    3.10
  -3  -6  -7   30.90    4.40
  -3  -6  -7   25.50    5.00
   3  -6   7   41.20    5.50
   3  -6   7   37.10    4.70
  -3   6  -7   35.80    5.30
  -3   6  -7   33.20    5.40
   4  -6   7   84.89    7.30
   4  -6   7   81.89    8.20
  -4  -6  -7   83.09    7.30
  -4  -6  -7   90.39    8.70
  -4   6  -7   75.89    7.80
  -4   6  -7   74.19    7.50
   5  -6   7   72.99    8.30
  -5  -6  -7  108.29    8.20
   5  -6   7   94.79    8.20
  -5  -6  -7  105.59    9.80
  -5   6  -7   87.79    8.60
  -5   6  -7   94.59    9.10
  -6  -6  -7   68.69    8.20
  -6  -6  -7   57.39    8.40
  -6  -6  -7   69.79    8.00
   6  -6   7   65.69    8.50
   6  -6   7   69.69    7.70
  -6   6  -7   88.29    9.40
  -6   6  -7   77.79    9.00
   7  -6   7   -0.80    4.00
  -7  -6  -7    4.30    5.20
  -7  -6  -7   -3.40    3.60
   7  -6   7    0.60    4.00
  -7   6  -7    6.50    5.50
   8  -6   7   38.20    7.60
  -8  -6  -7   47.80    9.50
  -8  -6  -7   44.90    8.00
   8  -6   7   42.00    8.30
  -8   6  -7   27.00    7.90
  -8  -7   7   81.99   11.80
   8  -7  -7   80.49   10.50
  -8  -7   7   72.99   10.10
  -8   7   7   85.19   11.40
  -7  -7   7    4.40    4.50
  -7  -7   7    5.60    5.40
   7  -7  -7   12.60    5.70
  -7   7   7    8.80    6.10
  -6  -7   7   18.60    5.80
  -6  -7   7   12.20    5.70
   6  -7  -7   11.40    5.30
  -6   7   7    9.60    5.50
  -5  -7   7   61.19    8.30
   5  -7  -7   68.19    8.10
  -5  -7   7   76.29    9.70
  -5   7   7   68.99    8.40
   4  -7  -7   81.49    8.10
  -4  -7   7   92.59    9.20
  -4  -7   7   67.49    8.70
  -4   7   7   85.59    9.10
   3  -7  -7  202.18   10.50
  -3  -7   7  215.68   10.90
  -3  -7   7  199.38   11.80
  -3   7   7  219.88   11.40
  -3   7   7  201.28   10.20
   3   7  -7  210.78   11.70
  -2  -7   7  106.19    8.70
   2  -7  -7   93.99    7.20
  -2  -7   7   93.29    7.40
   2   7  -7  107.89    8.50
  -2   7   7  108.69    7.90
  -2   7   7  110.19    7.60
  -1  -7   7   26.70    4.60
  -1  -7   7   23.60    5.10
   1  -7  -7   33.70    4.90
   1   7  -7   24.90    4.80
  -1   7   7   26.70    4.60
  -1   7   7   29.00    4.60
   0  -7  -7    4.60    2.60
   0  -7   7    1.40    2.50
   0  -7   7    4.10    3.10
   0   7   7    4.60    2.70
   0   7   7    3.20    2.60
   0   7  -7    2.70    3.10
   1  -7   7   24.70    4.90
   1  -7   7   35.40    4.90
  -1  -7  -7   28.20    4.60
  -1   7  -7   23.10    4.80
  -1   7  -7   36.00    4.70
   1   7   7   26.80    4.40
   2  -7   7  103.69    8.00
   2  -7   7  106.69    7.20
  -2  -7  -7   93.69    7.90
  -2   7  -7   96.29    8.80
   2   7   7   99.59    7.90
  -2   7  -7   95.69    7.60
  -3  -7  -7  191.98    9.30
  -3  -7  -7  223.48   11.90
   3  -7   7  193.48   10.80
   3  -7   7  201.38    9.90
  -3   7  -7  212.38   11.00
  -3   7  -7  198.78   11.20
  -4  -7  -7   96.39    9.70
   4  -7   7   94.89    8.00
  -4  -7  -7   76.99    7.50
   4  -7   7   68.09    7.70
  -4   7  -7   81.29    8.30
  -4   7  -7   83.19    8.80
   5  -7   7   59.09    7.20
  -5  -7  -7   64.39    7.70
   5  -7   7   48.40    7.20
  -5  -7  -7   52.39    7.80
  -5   7  -7   54.29    7.70
  -5   7  -7   67.19    8.30
   6  -7   7   15.00    5.30
  -6  -7  -7    9.30    4.60
  -6  -7  -7   13.90    5.70
   6  -7   7   16.00    5.70
  -6   7  -7   18.70    6.00
  -7  -7  -7    2.70    5.50
   7  -7   7   10.00    5.60
  -7  -7  -7    3.40    4.60
  -7   7  -7    9.10    5.90
  -8  -7  -7   83.79   10.70
  -8  -7  -7   75.99   11.20
   8  -7   7   73.59   10.30
  -8   7  -7   61.29   10.60
   7  -8  -7    1.30    5.80
  -7  -8   7   -0.60    4.30
  -7  -8   7   -0.10    5.80
  -7   8   7   -2.20    5.60
   6  -8  -7   30.70    6.70
  -6  -8   7   33.60    7.10
  -6  -8   7   28.60    7.30
  -6   8   7   25.40    7.10
   5  -8  -7   59.09    8.00
  -5  -8   7   54.09    8.30
  -5  -8   7   64.69    8.80
  -5   8   7   62.29    8.70
  -4  -8   7   16.90    5.90
  -4  -8   7   32.80    6.10
   4  -8  -7   19.50    5.40
  -4   8   7   30.20    6.30
  -3  -8   7   14.70    4.80
   3  -8  -7   13.90    4.70
  -3  -8   7   10.30    4.90
   3   8  -7   10.30    5.10
  -3   8   7   16.70    4.90
  -2  -8   7   48.20    6.40
   2  -8  -7   66.79    7.60
  -2  -8   7   73.19    8.30
  -2   8   7   70.29    7.60
   2   8  -7   66.79    7.90
  -1  -8   7   60.69    7.60
   1  -8  -7   63.69    7.20
  -1  -8   7   58.49    6.40
   1   8  -7   50.79    7.10
  -1   8   7   60.19    6.80
  -1   8   7   54.79    6.50
   0  -8  -7    4.60    3.20
   0  -8   7    3.50    3.40
   0  -8   7    3.80    3.00
   0   8   7   -0.30    3.20
   0   8  -7    2.10    3.80
   1  -8   7   57.19    6.50
  -1  -8  -7   61.29    7.20
   1  -8   7   58.59    7.60
   1   8   7   63.29    6.80
  -1   8  -7   64.39    7.60
   2  -8   7   62.69    7.70
  -2  -8  -7   72.29    8.10
   2  -8   7   51.59    6.40
  -2   8  -7   78.99    8.40
  -2   8  -7   68.99    7.50
   2   8   7   65.59    7.30
   3  -8   7   20.90    4.60
   3  -8   7   17.40    5.30
  -3  -8  -7   11.50    4.80
  -3   8  -7   15.20    4.80
  -3   8  -7   17.50    4.90
   4  -8   7   19.50    5.00
  -4  -8  -7   21.40    5.70
   4  -8   7   25.30    5.90
  -4   8  -7   43.20    7.00
  -4   8  -7   28.60    6.80
  -5  -8  -7   50.79    7.20
  -5  -8  -7   66.19    9.50
   5  -8   7   55.49    8.10
  -5   8  -7   56.59    8.50
  -6  -8  -7   31.00    6.60
  -6  -8  -7   33.10    7.60
   6  -8   7   19.90    6.40
  -6   8  -7   31.40    7.50
  -7  -8  -7    3.00    5.10
  -7  -8  -7   -1.50    5.30
   7  -8   7    2.20    5.40
  -7   8  -7   -4.20    5.80
  -6  -9   7    5.20    5.80
  -6  -9   7   14.90    6.90
   6  -9  -7   19.50    7.60
  -6   9   7    4.30    6.30
   5  -9  -7  131.39   11.90
  -5  -9   7  120.79   11.60
  -5  -9   7  118.19   12.30
  -5   9   7  120.59   12.00
  -4  -9   7  192.48   13.80
  -4  -9   7  173.68   12.10
   4  -9  -7  197.18   12.50
  -4   9   7  188.68   13.30
  -3  -9   7   15.40    5.00
  -3  -9   7   16.40    5.50
   3  -9  -7   15.90    5.20
  -3   9   7   13.80    5.30
  -2  -9   7    3.90    3.80
  -2  -9   7   -1.00    3.70
   2  -9  -7   -1.70    3.50
  -1  -9   7   56.69    7.10
  -1  -9   7   51.79    7.20
   1  -9  -7   39.90    6.50
   1   9  -7   56.19    8.10
   0  -9   7   -0.80    3.70
   0  -9   7   -1.10    2.80
   0  -9  -7    3.30    3.90
   0   9  -7   -2.80    3.20
  -1  -9  -7   50.49    7.40
   1  -9   7   52.99    6.60
   1  -9   7   50.89    7.80
   1   9   7   42.70    8.00
  -1   9  -7   52.59    8.00
  -2  -9  -7    5.70    4.20
   2  -9   7    0.90    4.10
   2  -9   7    1.40    3.50
   2   9   7    3.70    4.20
   3  -9   7   15.40    5.30
  -3  -9  -7   10.20    5.40
  -4  -9  -7  182.28   13.20
   4  -9   7  174.18   12.90
  -4   9  -7  180.48   13.00
  -5  -9  -7  129.29   12.80
   5  -9   7  106.19   11.10
  -5   9  -7  118.69   11.80
  -6  -9  -7    5.70    6.20
   6  -9   7   10.80    6.40
  -6   9  -7    3.70    6.30
  -5 -10   7    9.60    6.50
  -5 -10   7    6.10    5.30
  -5  10   7   18.20    7.00
  -4 -10   7    2.40    5.40
   4 -10  -7    2.60    5.40
  -4 -10   7    2.70    4.90
  -4  10   7    3.30    5.60
  -3 -10   7   31.40    7.10
   3 -10  -7   33.90    7.10
  -3 -10   7   28.70    6.50
   2 -10  -7   63.99    8.40
  -2 -10   7   44.40    7.20
  -2 -10   7   40.90    8.00
   1 -10  -7   -1.60    4.20
  -1 -10   7    9.70    4.90
  -1 -10   7    4.90    4.30
   0 -10  -7   48.20    7.30
   0 -10   7   41.90    7.00
   0 -10   7   46.80    8.10
   1 -10   7    1.30    4.20
  -1 -10  -7    2.20    4.10
   2 -10   7   45.70    7.90
  -2 -10  -7   54.39    8.40
   3 -10   7   33.70    7.50
  -3 -10  -7   34.70    7.30
   4 -10   7   -1.40    4.80
  -4 -10  -7    6.30    6.00
  -5 -10  -7    6.20    6.70
   5 -10   7    9.60    6.60
  -5  10  -7   14.80    7.00
  -3 -11   7    8.90    6.20
  -3 -11   7    4.10    5.40
   2 -11  -7   -8.60    4.70
  -2 -11   7    0.60    5.20
  -1 -11   7   12.40    6.10
   1 -11  -7   18.80    6.70
   0 -11  -7   -3.20    4.80
   0 -11   7   -2.70    4.70
   1 -11   7    9.60    5.90
  -1 -11  -7    6.30    5.10
   2 -11   7    0.10    4.90
  -2 -11  -7    3.30    5.50
  -3 -11  -7    8.00    6.30
   3 -11   7    8.50    5.80
 -10   0   8    1.40    5.50
 -10   0   8    7.80    5.60
  -9   0   8   -0.20    4.30
  -9   0   8   -2.40    3.70
  -8   0   8   30.90    6.10
  -8   0   8   26.20    5.80
  -8   0   8   37.70    6.90
  -7   0   8   70.19    7.40
  -7   0   8   71.79    7.50
  -7   0   8   79.29    8.30
  -7   0   8   73.39    7.50
  -6   0   8   36.80    5.30
  -6   0   8   29.20    4.20
  -6   0   8   27.40    4.70
  -6   0   8   26.80    4.70
  -6   0   8   22.80    4.30
  -5   0   8   -0.60    1.90
  -5   0   8    1.70    2.10
  -5   0   8    1.90    2.30
  -5   0   8    3.80    2.00
  -5   0   8    1.30    1.80
  -4   0   8   35.20    3.80
  -4   0   8   38.00    3.90
  -4   0   8   38.40    3.80
  -4   0   8   42.70    4.40
  -4   0   8   35.40    4.20
  -3   0   8 1279.07   20.90
  -3   0   8 1290.27   20.30
  -3   0   8 1275.37   20.30
  -3   0   8 1284.17   20.60
  -2   0   8 1966.80   27.60
  -2   0   8 1993.90   26.40
  -2   0   8 2008.00   25.90
  -1   0   8 9563.74  105.09
  -1   0   8 9666.13  101.59
  -1   0   8 9607.14  103.19
   1   0  -8 9426.86  104.79
   0   0  -8 2911.71   32.40
   0   0   8 2873.61   35.20
   0   0   8 2941.21   32.50
   0   0   8 2880.41   34.10
   0   0  -8 2874.61   35.80
   1   0   8 9775.42  104.19
   1   0   8 9750.52  104.79
  -1   0  -8 9696.73  104.89
   1   0   8 9743.62  105.99
  -1   0  -8 9803.82  107.59
   2   0   8 1979.80   23.60
  -2   0  -8 1962.10   27.80
   2   0   8 1987.40   26.50
  -2   0  -8 1992.00   27.00
   2   0   8 2000.70   27.30
  -3   0  -8 1275.77   21.40
   3   0   8 1252.97   21.10
  -3   0  -8 1271.47   21.20
  -4   0  -8   38.80    4.30
   4   0   8   30.40    3.90
  -4   0  -8   38.00    4.20
  -5   0  -8   -0.60    1.70
  -5   0  -8   -2.70    1.90
   5   0   8   -0.80    1.90
  -6   0  -8   23.60    4.50
  -6   0  -8   36.10    5.20
   6   0   8   34.90    5.40
   7   0   8   95.19    8.80
  -7   0  -8   81.49    7.90
  -7   0  -8   72.59    7.90
  -7   0  -8   85.99    8.90
  -8   0  -8   32.60    6.20
   8   0   8   29.80    6.40
  -8   0  -8   32.70    6.70
  -9   0  -8   -3.60    4.30
   9   0   8    1.50    4.00
 -10   0  -8   -1.90    6.10
 -10  -1   8   84.69   11.30
 -10  -1   8   90.19   10.90
 -10   1   8   72.99   10.40
  -9  -1   8    2.90    4.40
  -9  -1   8    8.10    4.90
  -9   1   8    2.90    4.80
  -8  -1   8  227.08   13.30
  -8  -1   8  255.27   13.70
  -8  -1   8  206.88   12.00
  -8   1   8  226.88   12.60
  -8   1   8  195.98   11.90
  -8   1   8  227.68   11.90
  -8   1   8  225.98   13.00
  -7  -1   8  116.19    8.40
  -7  -1   8  117.79    9.00
  -7  -1   8  123.89    9.40
  -7   1   8  122.99    9.20
  -7   1   8  112.09    8.80
  -7   1   8  105.89    8.30
  -7   1   8  121.99    8.30
  -6  -1   8   32.10    4.80
  -6  -1   8   19.20    4.20
  -6  -1   8   15.80    3.90
  -6  -1   8   28.10    4.20
  -6  -1   8   19.40    4.00
  -6   1   8   19.50    3.80
  -6   1   8   19.80    4.00
  -6   1   8   25.20    4.50
  -6   1   8   18.90    4.20
  -6   1   8   22.80    3.80
  -5  -1   8   37.60    4.90
  -5  -1   8   37.80    4.70
  -5  -1   8   40.80    4.70
  -5  -1   8   39.60    4.30
  -5  -1   8   40.50    4.60
  -5   1   8   43.50    5.30
  -5   1   8   48.10    4.90
  -5   1   8   53.59    5.40
  -5   1   8   41.60    4.30
  -5   1   8   36.70    4.10
  -4  -1   8   33.90    3.70
  -4  -1   8   27.30    3.50
  -4  -1   8   31.40    4.00
  -4  -1   8   31.40    3.90
  -4   1   8   30.40    3.50
  -4   1   8   30.90    3.50
  -4   1   8   29.90    4.00
  -4   1   8   36.80    3.90
  -3  -1   8  521.15   12.20
  -3  -1   8  514.65   12.10
  -3   1   8  503.55   10.20
  -3   1   8  491.25   11.50
  -3   1   8  506.75   10.70
  -3   1   8  486.95   12.20
  -2  -1   8 1797.02   25.80
  -2  -1   8 1828.62   25.30
   2   1  -8 1738.13   23.90
  -2   1   8 1743.93   22.40
  -2   1   8 1794.32   25.60
  -2   1   8 1756.22   22.40
  -1  -1   8    0.70    0.90
  -1  -1   8    1.60    1.00
   1  -1  -8    2.00    1.10
   1   1  -8    3.00    1.00
   1   1  -8    2.50    1.20
  -1   1   8    1.30    1.10
  -1   1   8    0.20    0.50
  -1   1   8    0.80    0.60
   0  -1  -8    9.50    1.80
   0  -1   8    6.20    1.30
   0  -1   8    8.30    1.30
   0   1   8    6.70    1.10
   0   1  -8    7.40    1.30
   0   1   8    8.20    1.50
   0   1  -8    5.90    1.40
  -1  -1  -8    1.60    0.80
   1  -1   8    0.50    1.10
  -1  -1  -8    1.40    0.80
  -1  -1  -8    0.80    1.20
   1  -1   8   -0.30    0.90
   1   1   8    2.00    0.90
  -1   1  -8    2.00    1.40
  -1   1  -8    1.10    1.00
   1   1   8    2.10    0.80
   1   1   8    2.10    1.00
  -2  -1  -8 1782.82   25.60
  -2  -1  -8 1803.32   24.70
  -2  -1  -8 1805.02   25.00
   2  -1   8 1802.72   25.90
   2  -1   8 1803.72   25.50
  -2   1  -8 1800.92   25.80
  -2   1  -8 1765.92   26.20
   2   1   8 1771.72   24.80
   2   1   8 1795.32   22.60
   3  -1   8  495.65   12.00
  -3  -1  -8  499.85   11.80
  -3  -1  -8  482.65   11.40
  -3  -1  -8  495.55   12.00
   3  -1   8  525.75   12.20
  -3   1  -8  506.95   12.60
   3   1   8  506.65   11.80
  -3   1  -8  499.05   12.30
  -4  -1  -8   34.00    4.20
  -4  -1  -8   33.10    3.90
   4  -1   8   36.10    4.30
   4  -1   8   29.80    3.90
  -4  -1  -8   31.90    4.20
   4   1   8   30.20    3.80
  -4   1  -8   29.90    4.20
  -4   1  -8   31.30    4.00
  -5  -1  -8   35.80    4.90
  -5  -1  -8   42.40    4.80
  -5  -1  -8   45.90    5.20
   5  -1   8   39.60    4.80
   5   1   8   51.79    5.50
  -5   1  -8   43.80    5.10
  -5   1  -8   54.09    5.70
  -6  -1  -8   14.10    4.00
  -6  -1  -8   19.10    4.00
   6  -1   8   20.50    4.70
  -6  -1  -8   18.70    3.90
   6   1   8   20.50    4.40
  -6   1  -8   14.60    4.10
  -6   1  -8   22.90    4.40
  -7  -1  -8  111.89    8.70
  -7  -1  -8  118.99   10.60
  -7  -1  -8  124.89    9.50
   7  -1   8  124.29    9.30
  -7   1  -8  107.59    9.00
   7   1   8  120.49    8.70
  -7   1  -8  105.79    8.80
   8  -1   8  237.58   12.90
  -8  -1  -8  202.78   13.30
  -8   1  -8  206.58   12.40
   9  -1   8   -2.50    4.30
  -9  -1  -8    3.70    5.10
  -9   1  -8    7.80    5.50
  -9   1  -8    1.50    4.80
 -10  -1  -8   83.49   11.50
  10  -1   8   99.19   11.80
 -10   1  -8   97.89   12.50
 -10  -2   8   25.10    8.00
 -10  -2   8   24.90    7.50
 -10   2   8   15.70    6.70
  -9  -2   8    3.90    5.20
  -9  -2   8   13.70    5.40
  -9   2   8    3.90    4.40
  -9   2   8    1.00    5.10
  -8  -2   8    3.90    3.60
  -8  -2   8   11.30    4.50
  -8  -2   8    6.70    4.60
  -8   2   8    7.10    4.30
  -8   2   8    9.40    4.30
  -8   2   8    1.70    3.70
  -7  -2   8    3.60    3.80
  -7  -2   8   15.80    4.60
  -7  -2   8   19.90    5.10
  -7   2   8   15.20    5.30
  -7   2   8   21.90    4.60
  -6  -2   8   34.30    5.20
  -6  -2   8   28.90    5.10
  -6  -2   8   32.80    5.60
  -6   2   8   30.80    5.40
  -6   2   8   23.60    4.30
  -6   2   8   36.10    4.80
  -5  -2   8    5.10    2.20
  -5  -2   8    3.70    2.60
  -5  -2   8    1.70    2.20
  -5  -2   8    0.20    2.00
  -5   2   8    1.30    1.80
  -5   2   8    1.00    2.00
  -5   2   8   -0.30    2.60
  -4  -2   8   -0.10    1.60
  -4  -2   8    6.20    2.50
  -4  -2   8    4.50    2.00
  -4   2   8    2.00    1.70
  -4   2   8    1.20    1.90
  -4   2   8    1.60    1.70
   3  -2  -8   40.70    3.60
  -3  -2   8   41.80    4.20
  -3  -2   8   43.00    4.30
  -3   2   8   47.10    3.50
  -3   2   8   33.70    3.80
  -3   2   8   38.40    2.70
  -3   2   8   34.10    4.10
  -2  -2   8   68.39    4.30
   2  -2  -8   62.49    3.20
  -2  -2   8   63.09    4.20
  -2   2   8   62.69    2.40
   2   2  -8   63.59    4.20
  -2   2   8   63.09    3.10
  -2   2   8   71.59    4.30
   2   2  -8   64.29    3.20
  -1  -2   8 1854.01   25.90
   1  -2  -8 1853.71   26.60
   1  -2  -8 1832.82   22.50
  -1  -2   8 1878.01   26.60
   1  -2  -8 1839.72   21.60
  -1   2   8 1906.11   27.20
   1   2  -8 1892.81   26.60
  -1   2   8 1890.31   22.10
   1   2  -8 1850.01   24.50
   0  -2  -8  278.17    7.40
   0  -2   8  288.77    7.20
   0  -2  -8  273.27    5.50
   0  -2  -8  271.77    4.90
   0  -2   8  281.27    7.50
   0   2  -8  281.27    7.60
   0   2   8  288.37    7.70
   0   2  -8  305.27    7.40
  -1  -2  -8 1907.01   26.10
  -1  -2  -8 1878.81   24.70
  -1  -2  -8 1885.91   23.90
   1  -2   8 1895.01   26.70
   1  -2   8 1874.91   26.20
  -1   2  -8 1844.52   26.30
  -1   2  -8 1875.11   26.50
   1   2   8 1864.91   25.70
   1   2   8 1868.41   23.70
   2  -2   8   63.19    4.20
  -2  -2  -8   69.09    4.10
   2  -2   8   65.79    4.30
  -2  -2  -8   64.39    3.80
  -2  -2  -8   64.99    3.70
  -2   2  -8   62.49    4.30
  -2   2  -8   64.19    4.20
   2   2   8   63.99    3.70
   2   2   8   66.59    3.50
  -3  -2  -8   36.70    3.90
  -3  -2  -8   38.30    3.60
   3  -2   8   42.40    4.30
   3  -2   8   40.90    4.30
  -3  -2  -8   43.90    4.10
  -3   2  -8   45.60    4.50
  -3   2  -8   34.20    4.20
   3   2   8   38.00    3.90
  -4  -2  -8    2.90    2.20
  -4  -2  -8    7.20    2.40
  -4  -2  -8    3.80    2.00
   4  -2   8    3.10    2.20
   4  -2   8   -1.40    1.70
  -4   2  -8    1.60    1.90
   4   2   8   -0.30    1.90
  -4   2  -8    5.20    2.60
   5  -2   8    4.70    2.80
   5  -2   8    2.80    2.70
  -5  -2  -8    0.30    2.30
  -5  -2  -8    2.80    2.30
  -5  -2  -8    4.40    2.50
  -5   2  -8    1.50    2.30
  -5   2  -8    7.10    2.80
   5   2   8    7.40    2.70
  -6  -2  -8   22.70    4.20
   6  -2   8   39.90    5.60
  -6  -2  -8   35.90    5.40
  -6  -2  -8   39.10    5.60
  -6   2  -8   32.60    5.40
  -6   2  -8   32.30    5.30
   6   2   8   35.60    5.30
   7  -2   8   24.10    5.20
  -7  -2  -8    9.80    4.00
  -7  -2  -8   17.50    5.40
  -7   2  -8   13.10    4.30
  -7   2  -8   10.90    4.90
   8  -2   8    2.80    3.70
  -8  -2  -8    7.40    5.20
  -8   2  -8    8.00    4.60
  -9  -2  -8    5.30    5.40
   9  -2   8    7.00    5.40
  -9   2  -8   -1.20    5.10
  10  -2   8    4.40    6.60
 -10  -2  -8   22.20    8.00
 -10   2  -8   12.50    7.40
 -10   2  -8    8.80    6.80
  -9  -3   8    0.80    5.10
  -9  -3   8   -6.50    4.20
  -9   3   8    2.90    5.20
  -9   3   8    2.30    4.70
  -8  -3   8   47.40    7.70
  -8  -3   8   26.90    5.90
  -8   3   8   52.69    7.60
  -8   3   8   38.50    7.10
  -7  -3   8   28.70    5.70
  -7  -3   8   25.60    5.50
  -7  -3   8   23.90    5.80
  -7   3   8   20.80    5.40
  -7   3   8   29.70    5.50
  -6  -3   8   72.09    7.40
  -6  -3   8   71.79    7.70
  -6  -3   8   70.89    7.30
  -6   3   8   68.19    7.60
  -6   3   8   73.79    6.90
  -6   3   8   64.59    6.30
  -5  -3   8   24.90    4.70
   5  -3  -8   19.60    4.00
  -5  -3   8   21.40    4.00
  -5   3   8   20.60    4.50
  -5   3   8   29.10    4.10
  -5   3   8   25.20    4.10
  -4  -3   8   40.80    5.20
   4  -3  -8   43.50    4.60
  -4  -3   8   32.80    4.40
  -4   3   8   37.70    4.90
  -4   3   8   40.20    4.50
  -4   3   8   43.10    4.20
  -3  -3   8  598.04   15.30
  -3  -3   8  620.84   15.40
   3  -3  -8  626.24   13.30
  -3   3   8  634.24   16.10
  -3   3   8  621.64   12.90
  -3   3   8  638.94   14.90
  -2  -3   8   27.80    3.60
   2  -3  -8   28.00    2.90
  -2  -3   8   33.00    3.90
  -2   3   8   25.50    3.50
  -2   3   8   26.40    3.50
   2   3  -8   30.00    2.50
  -2   3   8   31.80    2.70
   2   3  -8   31.40    3.70
   1  -3  -8   20.80    2.40
  -1  -3   8   22.40    3.20
  -1  -3   8   21.60    2.90
  -1   3   8   18.40    1.90
  -1   3   8   20.80    3.10
   1   3  -8   24.10    3.10
   1   3  -8   23.10    2.40
   0  -3  -8   15.60    2.00
   0  -3  -8   17.30    2.50
   0  -3   8   20.40    2.70
   0  -3   8   16.30    2.50
   0   3  -8   17.00    2.30
   0   3   8   20.80    2.00
   0   3   8   16.60    2.60
   0   3  -8   20.40    2.90
   1  -3   8   15.90    2.50
  -1  -3  -8   20.90    2.60
   1  -3   8   21.00    3.00
  -1  -3  -8   21.90    2.60
  -1   3  -8   18.20    2.80
   1   3   8   22.90    2.90
  -1   3  -8   18.60    2.80
   2  -3   8   29.10    3.50
   2  -3   8   26.30    3.60
  -2  -3  -8   27.40    3.40
  -2  -3  -8   34.20    3.20
  -2   3  -8   33.00    3.90
  -2   3  -8   34.00    3.80
   3  -3   8  631.64   14.80
   3  -3   8  620.94   15.20
  -3  -3  -8  626.14   12.70
  -3  -3  -8  610.74   14.90
  -3  -3  -8  641.34   14.40
  -3   3  -8  610.74   15.30
  -3   3  -8  639.44   15.60
  -4  -3  -8   40.80    4.60
  -4  -3  -8   41.20    5.10
  -4  -3  -8   45.10    4.20
   4  -3   8   43.70    4.80
   4  -3   8   46.60    5.30
  -4   3  -8   42.30    4.80
  -4   3  -8   41.80    5.20
  -5  -3  -8   31.70    4.30
   5  -3   8   22.70    4.10
  -5  -3  -8   34.00    4.80
  -5  -3  -8   21.10    4.50
   5  -3   8   28.60    4.90
  -5   3  -8   27.30    4.40
  -5   3  -8   28.00    4.70
   6  -3   8   61.09    6.60
  -6  -3  -8   71.09    7.80
   6  -3   8   49.00    6.30
  -6  -3  -8   73.69    7.50
  -6   3  -8   85.19    8.20
  -6   3  -8   78.39    8.00
  -7  -3  -8   23.30    5.90
   7  -3   8   25.40    5.80
  -7  -3  -8   30.00    5.90
   7  -3   8   29.30    5.90
  -7   3  -8   24.60    5.50
  -7   3  -8   35.80    6.60
   8  -3   8   45.70    7.40
  -8  -3  -8   52.59    8.20
  -8   3  -8   50.79    7.90
   9  -3   8    1.30    5.00
  -9  -3  -8    0.50    5.20
  -9   3  -8   -0.60    5.60
  -9  -4   8    2.00    4.90
  -9  -4   8    3.80    5.50
  -9   4   8    3.70    5.50
  -8  -4   8    8.50    5.30
  -8  -4   8    5.00    4.30
  -8   4   8   -0.50    4.50
  -7  -4   8   11.00    4.40
  -7  -4   8   22.50    5.80
  -7  -4   8   11.40    4.60
  -7   4   8    7.50    3.90
  -7   4   8   14.80    5.30
  -6  -4   8    2.90    3.60
   6  -4  -8    3.80    3.30
  -6  -4   8    4.10    3.30
  -6   4   8   -0.20    2.50
  -6   4   8    7.40    4.20
  -6   4   8   -2.00    2.70
  -5  -4   8   70.29    7.40
   5  -4  -8   83.79    6.50
  -5  -4   8   80.49    7.90
  -5   4   8   56.69    6.90
  -5   4   8   77.19    6.20
  -5   4   8   59.19    5.80
   4  -4  -8  115.09    6.60
  -4  -4   8  133.19    8.10
  -4  -4   8  124.19    8.20
  -4   4   8  118.09    6.50
  -4   4   8  130.59    7.40
  -4   4   8  139.09    8.50
  -3  -4   8    4.20    2.60
  -3  -4   8    5.90    2.50
   3  -4  -8    2.20    2.10
  -3   4   8    7.70    2.20
  -3   4   8    2.70    1.80
  -3   4   8    4.30    2.30
   3   4  -8    4.10    2.40
  -2  -4   8  358.96   11.80
   2  -4  -8  357.66    9.70
  -2  -4   8  349.47   11.00
  -2   4   8  355.66    9.20
  -2   4   8  355.36   11.20
  -2   4   8  364.96   11.60
   2   4  -8  324.07   11.00
   2   4  -8  350.76    7.10
  -1  -4   8  163.48    7.20
   1  -4  -8  145.69    5.90
  -1  -4   8  169.28    7.80
   1   4  -8  164.78    5.30
  -1   4   8  173.58    7.70
   1   4  -8  147.39    7.50
  -1   4   8  159.18    5.70
   0  -4   8  996.40   19.20
   0  -4  -8  982.60   17.10
   0  -4   8  966.20   18.40
   0  -4  -8  975.60   13.50
   0   4   8  991.50   19.60
   0   4   8 1030.60   16.90
   0   4  -8 1020.70   17.00
   0   4  -8 1046.50   20.40
  -1  -4  -8  163.48    5.30
  -1  -4  -8  165.98    6.20
   1  -4   8  164.08    7.10
  -1  -4  -8  154.68    6.70
   1  -4   8  148.99    7.10
   1   4   8  162.28    6.30
  -1   4  -8  173.68    7.00
  -1   4  -8  165.88    7.40
  -2  -4  -8  345.97    8.90
   2  -4   8  361.86   10.70
  -2  -4  -8  351.96    9.30
   2  -4   8  366.16   11.40
  -2  -4  -8  354.06   10.80
  -2   4  -8  350.76   10.80
  -2   4  -8  351.86   11.50
  -3  -4  -8    4.10    2.40
   3  -4   8    5.10    2.40
   3  -4   8    3.60    2.50
  -3  -4  -8    3.40    1.70
  -3   4  -8   10.20    3.20
  -3   4  -8    1.30    2.00
  -4  -4  -8  143.99    8.30
   4  -4   8  138.89    8.00
   4  -4   8  132.59    7.40
  -4  -4  -8  128.09    7.40
  -4   4  -8  144.99    8.50
  -4   4  -8  120.79    8.00
  -5  -4  -8   80.89    7.60
   5  -4   8   71.69    6.90
  -5  -4  -8   73.89    7.00
   5  -4   8   65.89    7.10
  -5   4  -8   61.69    6.80
  -5   4  -8   70.49    7.20
   6  -4   8    6.10    3.80
   6  -4   8    3.50    3.50
  -6  -4  -8   -1.70    3.30
  -6  -4  -8    4.00    3.10
  -6   4  -8    2.50    3.90
  -6   4  -8    2.30    3.00
  -7  -4  -8   16.60    4.90
   7  -4   8    9.10    4.40
   7  -4   8   21.40    5.50
  -7  -4  -8   17.10    5.30
  -7   4  -8    9.10    3.90
  -7   4  -8   19.20    5.60
   8  -4   8   -0.20    4.50
  -8  -4  -8    3.20    5.10
  -8   4  -8    7.10    5.20
  -9  -4  -8    1.70    5.70
  -9  -4  -8    3.30    4.20
   9  -4   8    3.20    4.90
  -9   4  -8    7.60    6.50
  -9  -5   8   16.30    6.70
  -9  -5   8   16.90    6.70
  -9   5   8   15.00    7.10
  -8  -5   8   27.10    7.00
  -8  -5   8   36.80    7.20
  -8   5   8   25.70    7.10
  -7  -5   8   80.09    9.40
   7  -5  -8   62.69    8.10
  -7  -5   8   75.19    9.40
  -7   5   8   74.99    9.30
  -6  -5   8   44.80    6.60
  -6  -5   8   26.00    6.20
   6  -5  -8   41.20    6.30
  -6   5   8   44.00    6.00
  -6   5   8   40.30    5.90
  -6   5   8   32.50    6.40
  -5  -5   8   15.90    4.70
   5  -5  -8   40.50    5.60
  -5  -5   8   30.40    5.50
  -5   5   8   18.50    4.20
  -5   5   8   24.20    5.40
  -5   5   8    5.90    3.10
   4  -5  -8   14.50    3.80
  -4  -5   8   20.60    4.00
  -4  -5   8   15.00    4.00
  -4   5   8   18.90    4.30
  -4   5   8   16.60    3.80
  -4   5   8   24.20    3.90
  -3  -5   8   16.50    3.80
  -3  -5   8   15.00    4.20
   3  -5  -8   15.20    3.40
   3   5  -8   10.20    3.50
  -3   5   8   19.40    3.80
  -3   5   8   13.70    3.60
  -3   5   8   16.00    3.00
  -2  -5   8  117.89    7.20
   2  -5  -8  121.29    6.30
  -2  -5   8  113.09    7.50
  -2   5   8  115.39    7.10
   2   5  -8  116.69    7.40
  -2   5   8  120.89    5.90
  -2   5   8  120.39    7.40
  -1  -5   8   23.10    3.80
  -1  -5   8   26.10    4.10
   1  -5  -8   30.00    3.70
  -1   5   8   18.70    3.60
  -1   5   8   26.20    3.80
   1   5  -8   26.80    2.80
  -1   5   8   27.80    3.20
   1   5  -8   14.20    3.40
   0  -5  -8    1.40    1.70
   0  -5   8   -1.10    1.50
   0  -5  -8   -0.70    1.10
   0  -5   8   -0.40    1.70
   0   5  -8    1.30    1.70
   0   5  -8   -2.60    2.00
   0   5   8    0.80    1.60
  -1  -5  -8   26.80    3.80
   1  -5   8   22.70    3.50
  -1  -5  -8   21.60    2.70
   1  -5   8   27.80    4.20
   1   5   8   25.00    3.40
  -1   5  -8   34.70    3.90
  -1   5  -8   30.30    4.30
  -2  -5  -8  115.99    6.90
  -2  -5  -8  118.39    5.80
   2  -5   8  117.99    6.70
   2  -5   8  124.09    7.20
  -2  -5  -8  121.89    5.50
  -2   5  -8  119.29    7.40
  -2   5  -8  133.69    7.20
  -3  -5  -8   19.50    3.30
  -3  -5  -8   11.50    3.50
   3  -5   8   15.30    3.20
   3  -5   8   18.70    4.20
  -3   5  -8   15.40    3.60
  -3   5  -8   14.50    3.80
   4  -5   8   26.50    4.40
   4  -5   8   20.70    4.30
  -4  -5  -8   17.90    4.40
  -4  -5  -8   18.40    3.80
  -4   5  -8   15.50    4.20
  -4   5  -8   21.00    4.20
  -5  -5  -8   23.00    4.50
   5  -5   8   21.80    4.90
  -5  -5  -8   27.80    4.90
   5  -5   8   16.50    4.40
  -5  -5  -8   18.50    5.10
  -5   5  -8   19.10    4.50
  -5   5  -8   30.10    5.50
  -6  -5  -8   51.09    6.60
  -6  -5  -8   44.60    6.50
   6  -5   8   39.70    5.90
   6  -5   8   28.60    5.70
  -6  -5  -8   37.00    6.90
  -6   5  -8   42.00    6.70
  -6   5  -8   40.00    7.00
  -7  -5  -8   82.09    9.10
   7  -5   8   75.89    8.40
  -7  -5  -8   81.79   10.70
  -7  -5  -8   95.89   10.50
   7  -5   8   74.09    8.90
  -7   5  -8   84.59    9.70
   8  -5   8   24.90    6.40
  -8  -5  -8   22.10    6.10
   8  -5   8   32.80    7.30
  -8  -5  -8   20.20    6.40
  -8   5  -8   31.60    7.30
   9  -5   8    6.30    6.30
  -9  -5  -8    6.80    6.70
  -9  -5  -8   18.50    6.30
  -9   5  -8   15.30    6.80
  -8  -6   8   12.10    6.30
  -8  -6   8    0.90    4.60
  -8   6   8    6.00    5.70
  -7  -6   8   31.50    6.80
   7  -6  -8   39.60    6.80
  -7  -6   8   22.00    6.80
  -7   6   8   27.20    6.80
  -6  -6   8   32.70    7.00
  -6  -6   8   34.70    6.60
   6  -6  -8   20.20    5.50
  -6   6   8   42.60    7.40
  -6   6   8   28.30    5.80
   5  -6  -8   31.30    5.40
  -5  -6   8   17.50    5.20
  -5  -6   8   30.70    6.00
  -5   6   8   31.00    5.50
  -5   6   8   28.10    5.60
   4  -6  -8   53.29    6.20
  -4  -6   8   45.20    6.10
  -4  -6   8   59.89    7.50
  -4   6   8   46.80    5.60
  -4   6   8   58.09    6.80
  -4   6   8   62.29    7.50
   3  -6  -8   -1.70    2.20
  -3  -6   8    4.50    3.10
  -3  -6   8    3.20    2.80
   3   6  -8   -1.40    2.30
  -3   6   8   -1.50    2.80
  -3   6   8    2.80    2.40
  -2  -6   8   21.70    4.00
  -2  -6   8   15.90    4.20
   2  -6  -8   14.10    3.40
  -2   6   8   14.80    3.10
   2   6  -8   16.60    3.90
  -2   6   8   17.30    3.70
   1  -6  -8   85.79    6.10
  -1  -6   8  102.99    6.70
  -1  -6   8   97.49    7.10
  -1   6   8  102.59    6.80
  -1   6   8   94.59    6.10
   1   6  -8   97.29    7.50
   0  -6   8   20.30    3.90
   0  -6   8   20.40    3.50
   0  -6  -8   26.60    3.90
   0   6  -8   19.30    3.20
   0   6   8   16.70    3.20
   0   6   8   24.20    3.70
   0   6  -8   17.00    3.90
  -1  -6  -8  101.79    6.90
   1  -6   8   93.49    7.20
   1  -6   8   98.19    6.50
   1   6   8  100.09    6.40
  -1   6  -8  107.89    7.40
  -1   6  -8   97.89    6.30
   2  -6   8   15.50    3.40
  -2  -6  -8   12.90    3.70
   2  -6   8   20.00    4.10
  -2  -6  -8   14.30    2.90
  -2   6  -8   16.60    3.70
  -2   6  -8   12.50    3.40
  -3  -6  -8    1.00    2.20
   3  -6   8    5.00    2.90
   3  -6   8    0.70    2.10
  -3  -6  -8    4.20    3.40
  -3   6  -8   -0.50    2.40
  -3   6  -8   -1.00    2.60
   4  -6   8   50.79    6.70
  -4  -6  -8   49.90    6.70
   4  -6   8   59.79    6.50
  -4  -6  -8   69.79    6.70
  -4   6  -8   51.39    6.60
  -4   6  -8   50.19    6.60
  -5  -6  -8   18.40    4.70
  -5  -6  -8   30.60    6.50
  -5  -6  -8   18.50    4.60
   5  -6   8   26.30    5.60
   5  -6   8   21.70    5.20
  -5   6  -8   33.80    6.20
  -5   6  -8   30.30    5.60
  -6  -6  -8   32.70    6.10
   6  -6   8   31.80    6.60
  -6  -6  -8   38.60    7.40
  -6  -6  -8   36.50    6.40
   6  -6   8   39.60    6.40
  -6   6  -8   27.40    6.80
   7  -6   8   30.80    6.00
  -7  -6  -8   28.30    7.10
   7  -6   8   36.10    7.20
  -7  -6  -8   25.60    6.20
  -7   6  -8   24.50    6.80
   8  -6   8   -0.20    4.20
  -8  -6  -8   -1.30    4.60
  -8  -6  -8   12.80    6.60
   8  -6   8    4.80    5.60
  -8   6  -8    0.10    5.70
  -8  -7   8   30.90    8.60
  -8  -7   8   29.70    7.70
  -8   7   8   28.40    7.70
  -7  -7   8   50.39    9.20
  -7  -7   8   39.20    7.50
   7  -7  -8   39.90    7.70
  -7   7   8   37.80    8.20
  -6  -7   8   -3.50    4.10
  -6  -7   8    1.90    4.30
   6  -7  -8   -0.60    4.50
  -6   7   8    3.90    5.00
  -5  -7   8    7.70    4.40
  -5  -7   8    8.70    5.20
   5  -7  -8    6.20    4.50
  -5   7   8    6.10    4.70
  -4  -7   8  198.28   12.20
   4  -7  -8  177.38   10.20
  -4  -7   8  213.78   11.80
   4   7  -8  214.48   12.30
  -4   7   8  213.08   12.40
  -3  -7   8  432.26   17.00
   3  -7  -8  437.26   14.70
  -3  -7   8  421.26   15.50
  -3   7   8  419.06   15.80
   3   7  -8  424.46   16.40
  -2  -7   8  175.78    9.60
   2  -7  -8  183.58    9.60
  -2  -7   8  186.88   10.80
  -2   7   8  184.48    9.50
   2   7  -8  205.78   11.40
  -2   7   8  196.68   10.40
  -1  -7   8   22.00    4.30
   1  -7  -8   22.20    4.10
  -1  -7   8    8.10    3.80
   1   7  -8   28.40    5.00
  -1   7   8   18.80    4.00
  -1   7   8   22.20    4.20
   0  -7   8   -0.60    2.30
   0  -7   8    4.00    2.70
   0  -7  -8   -1.80    2.20
   0   7   8    2.50    2.50
   0   7  -8    0.10    2.20
   0   7   8    2.70    2.90
   1  -7   8   21.10    4.70
   1  -7   8    9.60    3.40
  -1  -7  -8   22.20    4.40
  -1   7  -8   20.90    4.10
  -1   7  -8   16.30    4.40
   1   7   8   20.20    4.10
   2  -7   8  198.38    9.60
   2  -7   8  173.18   10.40
  -2  -7  -8  196.68   10.70
  -2   7  -8  188.38    9.50
  -2   7  -8  186.38   10.70
   2   7   8  194.68    9.80
   3  -7   8  382.46   13.70
  -3  -7  -8  408.16   15.80
   3  -7   8  413.96   15.80
  -3   7  -8  406.26   15.90
  -3   7  -8  399.16   14.90
  -4  -7  -8  187.28   10.10
  -4  -7  -8  193.18   12.10
   4  -7   8  188.98   11.50
   4  -7   8  202.28   10.60
  -4   7  -8  211.58   12.00
  -4   7  -8  211.78   12.40
   5  -7   8   13.50    4.40
   5  -7   8   10.10    4.50
  -5  -7  -8    4.00    4.80
  -5  -7  -8    5.40    3.80
  -5   7  -8   16.70    5.30
  -5   7  -8    5.80    5.00
  -6  -7  -8    5.90    4.50
  -6  -7  -8   -0.60    4.50
   6  -7   8    3.80    4.40
   6  -7   8    4.20    4.70
  -6   7  -8    3.10    5.30
  -7  -7  -8   40.40    7.70
   7  -7   8   32.40    7.30
  -7  -7  -8   45.80    8.90
  -7   7  -8   30.10    8.00
  -8  -7  -8   41.70    9.40
  -8  -7  -8   39.90    8.00
  -8   7  -8   32.80    8.50
  -7  -8   8    6.80    6.10
  -7  -8   8    4.70    5.30
  -7   8   8    6.30    5.90
   6  -8  -8    2.60    5.10
  -6  -8   8    5.50    4.90
  -6  -8   8   -5.40    4.70
  -6   8   8    7.30    6.10
  -5  -8   8   44.20    7.30
  -5  -8   8   58.99    9.20
   5  -8  -8   46.80    7.20
  -5   8   8   43.30    7.70
  -4  -8   8   -1.10    4.00
  -4  -8   8   -0.60    3.20
   4  -8  -8    7.00    4.10
  -4   8   8    5.50    4.30
  -3  -8   8   72.19    7.90
   3  -8  -8   55.49    6.90
  -3  -8   8   58.89    8.10
  -3   8   8   68.69    8.30
   3   8  -8   67.59    8.80
  -2  -8   8    9.70    4.30
  -2  -8   8    9.30    4.00
   2  -8  -8    9.70    4.40
  -2   8   8    8.00    4.30
   2   8  -8   15.10    4.90
   1  -8  -8  135.19    9.30
  -1  -8   8  125.39    9.80
  -1  -8   8  124.59    8.50
   1   8  -8  130.19   10.20
  -1   8   8  129.49    9.00
   0  -8   8   17.80    4.90
   0  -8   8   16.50    4.30
   0  -8  -8   12.60    4.20
   0   8  -8   17.70    4.80
   0   8   8   16.00    5.20
   1  -8   8  129.49    9.80
   1  -8   8  122.29    8.30
  -1  -8  -8  121.59    8.90
  -1   8  -8  145.69   10.20
   1   8   8  128.89    9.10
   2  -8   8   10.00    4.30
  -2  -8  -8   21.80    5.20
   2  -8   8    3.60    4.00
  -2   8  -8    2.00    3.10
  -2   8  -8    2.60    3.90
   2   8   8   15.10    4.30
   3  -8   8   56.19    6.60
   3  -8   8   56.49    7.60
  -3  -8  -8   62.89    8.10
  -3   8  -8   49.50    7.20
  -3   8  -8   45.50    6.80
   4  -8   8    4.20    4.10
   4  -8   8    1.70    3.50
  -4  -8  -8    2.10    4.40
  -4   8  -8    7.70    4.90
   5  -8   8   44.60    7.80
  -5  -8  -8   50.19    8.70
  -5   8  -8   38.60    7.30
  -6  -8  -8    7.40    5.00
   6  -8   8    0.50    4.90
  -6  -8  -8   -0.30    4.90
  -6   8  -8    0.00    5.30
  -7  -8  -8    9.40    5.80
  -7  -8  -8    6.50    6.40
   7  -8   8    4.30    5.70
  -7   8  -8   17.30    7.60
  -6  -9   8   14.80    6.80
  -6  -9   8    7.00    5.60
  -6   9   8    8.40    6.70
  -5  -9   8   20.90    7.00
  -5  -9   8   23.10    6.30
  -5   9   8   19.40    6.70
  -4  -9   8   26.30    6.20
  -4  -9   8   17.30    5.90
   4  -9  -8   18.20    5.70
  -4   9   8   10.50    5.50
  -3  -9   8   30.40    6.00
   3  -9  -8   39.50    7.10
  -3  -9   8   35.70    7.30
  -3   9   8   42.00    7.20
  -2  -9   8   92.29   10.00
  -2  -9   8   79.19    8.60
   2  -9  -8   71.09    8.00
  -1  -9   8   -2.40    3.10
   1  -9  -8    2.40    3.80
  -1  -9   8   -0.40    3.20
   1   9  -8   -1.50    3.90
   0  -9   8    9.40    4.10
   0  -9  -8   17.90    4.70
   0  -9   8   17.00    5.20
   0   9  -8   12.30    5.30
   1  -9   8    2.70    3.80
   1  -9   8    2.20    4.00
  -1  -9  -8    2.10    3.60
  -1   9  -8   -1.20    4.10
   2  -9   8   63.09    7.40
   2  -9   8   62.59    8.60
  -2  -9  -8   69.89    8.40
  -3  -9  -8   44.40    8.00
   3  -9   8   41.30    6.90
  -4  -9  -8   15.00    6.10
   4  -9   8   14.00    5.80
  -4   9  -8   16.70    5.90
   5  -9   8   16.70    6.30
  -5  -9  -8   21.60    6.70
  -5   9  -8   24.10    7.40
   6  -9   8    7.70    6.20
  -6  -9  -8   14.10    7.70
  -6   9  -8   -1.10    6.00
  -5 -10   8    8.00    5.70
  -5 -10   8    2.00    5.90
  -5  10   8    7.70    6.50
  -4 -10   8   15.00    5.90
  -4 -10   8   13.90    6.50
  -4  10   8   24.50    7.50
  -3 -10   8    4.90    4.60
  -3 -10   8    7.20    5.30
  -2 -10   8    5.40    4.60
   2 -10  -8   18.20    5.80
  -2 -10   8    8.70    5.50
  -1 -10   8  147.09   11.20
   1 -10  -8  156.18   11.60
  -1 -10   8  156.68   10.60
   0 -10   8   55.99    8.40
   0 -10   8   61.29    7.90
   0 -10  -8   56.99    7.80
   1 -10   8  169.38   12.70
  -1 -10  -8  163.58   11.80
  -2 -10  -8   11.90    5.50
   2 -10   8   -1.60    4.80
  -3 -10  -8   12.00    5.80
   3 -10   8   10.50    5.50
   4 -10   8    1.80    5.30
  -4 -10  -8   18.70    6.80
  -5 -10  -8   13.80    7.10
   5 -10   8    3.40    5.80
  -5  10  -8    9.80    6.70
  -3 -11   8   19.80    7.20
  -3 -11   8   18.20    6.60
  -2 -11   8    7.50    5.70
  -2 -11   8   -2.60    4.40
  -1 -11   8   -5.50    4.50
   0 -11  -8   -1.50    5.30
   0 -11   8    2.00    5.30
  -1 -11  -8    7.40    5.90
   1 -11   8    6.90    5.00
  -2 -11  -8    1.70    6.10
   2 -11   8   -1.10    5.30
  -3 -11  -8   14.60    6.90
   3 -11   8   12.90    6.80
 -10   0   9   -2.60    5.50
  -9   0   9    4.80    4.30
  -9   0   9    0.10    4.40
  -8   0   9    6.50    4.20
  -8   0   9    1.30    3.70
  -8   0   9   -2.30    3.90
  -7   0   9    9.30    3.80
  -7   0   9    9.20    4.00
  -7   0   9   11.10    3.90
  -7   0   9    2.90    3.20
  -6   0   9    3.60    2.80
  -6   0   9    0.20    2.40
  -6   0   9    1.50    2.60
  -6   0   9    1.10    2.90
  -6   0   9    4.20    2.70
  -5   0   9    0.50    1.60
  -5   0   9    0.00    1.90
  -5   0   9    1.20    2.10
  -5   0   9   -0.20    1.70
  -5   0   9    1.20    2.00
  -4   0   9   28.30    3.50
  -4   0   9   28.10    3.40
  -4   0   9   30.10    3.80
  -4   0   9   24.30    3.40
  -4   0   9   23.50    3.30
  -3   0   9   15.00    2.50
  -3   0   9   16.80    2.40
  -3   0   9   16.80    2.80
  -3   0   9   19.00    2.70
   2   0  -9    2.20    1.50
  -2   0   9    3.80    1.70
  -2   0   9    4.20    1.40
  -2   0   9    3.50    1.20
   1   0  -9    0.50    1.20
  -1   0   9    1.20    1.10
  -1   0   9    0.20    1.20
  -1   0   9    1.70    0.80
   0   0  -9    1.50    1.20
   0   0   9    0.30    0.90
   0   0  -9    1.20    0.60
   0   0   9    0.80    0.90
   0   0   9    0.60    0.60
  -1   0  -9    0.70    1.20
   1   0   9    1.50    1.10
   1   0   9    0.30    1.00
  -1   0  -9    3.20    1.10
   1   0   9    1.40    0.90
  -2   0  -9    3.10    1.80
  -2   0  -9    5.10    1.50
   2   0   9    4.30    1.60
   2   0   9    1.80    1.30
   2   0   9    3.40    1.10
  -3   0  -9   20.50    3.00
  -3   0  -9   16.50    2.90
   3   0   9   15.40    2.90
   4   0   9   28.40    3.80
  -4   0  -9   28.00    3.90
  -4   0  -9   28.00    3.70
  -5   0  -9    0.40    2.40
   5   0   9    1.40    2.10
  -5   0  -9   -0.30    1.70
   6   0   9    0.10    2.80
  -6   0  -9    4.00    2.70
  -6   0  -9    1.90    3.00
  -7   0  -9    7.40    4.30
  -7   0  -9   12.70    4.40
   7   0   9   15.10    4.80
  -7   0  -9    8.20    4.10
  -8   0  -9   -4.10    4.40
  -8   0  -9    6.30    4.60
   8   0   9   -2.00    4.20
   9   0   9    2.20    4.40
  -9   0  -9   -5.40    4.30
 -10   0  -9    3.80    5.40
 -10  -1   9   34.30    7.70
 -10  -1   9   43.60    9.40
 -10   1   9   40.30    8.20
  -9  -1   9    4.50    4.70
  -9  -1   9    0.30    5.20
  -9   1   9   14.20    5.60
  -8  -1   9    8.70    4.40
  -8  -1   9    2.00    4.00
  -8  -1   9   -0.50    3.50
  -8   1   9    0.50    3.80
  -8   1   9    5.40    4.20
  -8   1   9    1.90    4.20
  -8   1   9    0.30    3.80
  -7  -1   9  117.49    9.20
  -7  -1   9  111.29    9.30
  -7  -1   9   99.19    8.90
  -7   1   9   92.49    8.30
  -7   1   9  101.89    9.10
  -7   1   9  107.79    8.60
  -7   1   9   97.49    8.20
  -6  -1   9   25.00    4.40
  -6  -1   9   27.70    4.60
  -6  -1   9   26.10    4.80
  -6  -1   9   31.70    4.40
  -6  -1   9   22.70    4.50
  -6   1   9   22.00    4.20
  -6   1   9   36.20    4.80
  -6   1   9   29.70    5.20
  -6   1   9   25.90    4.70
  -6   1   9   31.70    4.70
  -5  -1   9   26.20    3.90
  -5  -1   9   27.90    4.00
  -5  -1   9   28.10    4.30
  -5  -1   9   25.40    4.00
  -5  -1   9   25.20    4.10
  -5   1   9   24.20    4.30
  -5   1   9   32.30    4.20
  -5   1   9   25.10    3.90
  -5   1   9   30.30    4.10
  -5   1   9   25.10    4.00
  -4  -1   9  111.39    5.80
  -4  -1   9  112.49    6.20
  -4  -1   9  110.79    6.10
  -4  -1   9  106.09    6.00
  -4   1   9  112.29    5.90
  -4   1   9  117.69    5.70
  -4   1   9  105.99    5.30
  -4   1   9  108.39    5.90
  -4   1   9  116.59    6.70
  -3  -1   9    8.10    2.30
  -3  -1   9   11.60    2.50
  -3   1   9   11.40    2.40
  -3   1   9    8.50    1.90
  -3   1   9   11.60    2.00
  -2  -1   9   97.59    4.50
  -2  -1   9  108.39    4.90
  -2   1   9  105.89    3.70
  -2   1   9  113.49    5.20
  -2   1   9  114.79    3.90
   2   1  -9  104.29    4.70
   1  -1  -9  138.49    5.50
  -1  -1   9  140.89    4.40
  -1  -1   9  140.09    5.00
  -1   1   9  149.19    5.50
  -1   1   9  147.49    2.70
  -1   1   9  148.49    2.80
   1   1  -9  156.78    4.90
   1   1  -9  150.28    5.10
  -1   1   9  145.49    3.70
   0  -1  -9   10.50    1.80
   0  -1   9    6.40    1.50
   0  -1   9   11.50    1.50
   0   1  -9    9.10    1.50
   0   1   9    8.60    1.70
   0   1  -9   10.80    1.90
   0   1   9   11.30    1.30
  -1  -1  -9  147.79    4.10
  -1  -1  -9  140.99    5.40
  -1  -1  -9  148.19    4.10
   1  -1   9  158.48    5.50
   1  -1   9  151.58    4.70
  -1   1  -9  152.18    5.60
   1   1   9  144.69    4.00
   1   1   9  142.69    4.80
   1   1   9  140.79    4.50
  -1   1  -9  148.79    5.00
   2  -1   9  101.49    4.70
  -2  -1  -9   99.69    4.90
  -2  -1  -9  117.29    4.70
  -2  -1  -9  102.29    4.50
   2  -1   9   93.79    4.90
   2   1   9  100.69    4.60
  -2   1  -9   92.39    5.20
  -2   1  -9  107.49    4.90
   2   1   9  104.39    3.80
  -3  -1  -9   12.20    2.70
   3  -1   9   11.80    2.70
   3  -1   9   11.20    2.40
  -3  -1  -9   10.50    2.40
  -3  -1  -9   17.60    2.80
  -3   1  -9   17.00    3.30
   3   1   9   11.50    1.60
  -3   1  -9   12.90    2.60
   3   1   9   10.70    2.60
  -4  -1  -9  115.99    6.20
   4  -1   9  105.19    6.30
   4  -1   9  107.59    6.30
  -4  -1  -9  103.29    6.10
  -4  -1  -9  106.09    6.30
  -4   1  -9  116.59    7.00
  -4   1  -9  115.09    6.50
   4   1   9  120.89    6.70
  -5  -1  -9   19.80    3.80
  -5  -1  -9   28.70    4.40
  -5  -1  -9   27.00    4.30
   5  -1   9   29.00    4.30
  -5   1  -9   26.10    4.40
  -5   1  -9   25.90    4.30
   5   1   9   27.30    4.50
  -6  -1  -9   34.40    5.30
  -6  -1  -9   37.30    5.20
   6  -1   9   35.10    5.20
  -6  -1  -9   27.30    4.80
  -6   1  -9   26.00    4.60
  -6   1  -9   30.20    5.30
   6   1   9   33.70    5.10
  -7  -1  -9   94.69    9.00
   7  -1   9  100.29    9.20
  -7  -1  -9  105.79    8.90
  -7  -1  -9  105.19   10.00
  -7   1  -9  100.79    9.20
  -7   1  -9  108.09    9.20
   7   1   9  104.29    9.40
  -8  -1  -9    3.90    3.90
   8  -1   9   -1.60    4.00
  -8   1  -9    1.70    4.80
   8   1   9    3.10    4.20
   9  -1   9    6.90    5.20
  -9  -1  -9    5.30    5.50
  -9   1  -9    9.30    5.70
  -9   1  -9    7.40    4.70
 -10  -1  -9   43.70    9.50
  10  -1   9   26.00    7.90
 -10   1  -9   41.00    9.30
  -9  -2   9   59.29    9.80
  -9  -2   9   69.59    9.50
  -9   2   9   61.39    9.10
  -9   2   9   39.90    7.40
  -8  -2   9   38.80    6.80
  -8  -2   9   26.50    6.00
  -8  -2   9   34.50    6.90
  -8   2   9   48.70    7.10
  -8   2   9   31.80    6.30
  -8   2   9   42.80    7.00
  -7  -2   9   35.20    6.00
  -7  -2   9   30.90    5.50
  -7  -2   9   19.10    5.40
  -7   2   9   24.30    5.40
  -7   2   9   30.40    5.40
  -7   2   9   37.10    6.10
  -6  -2   9  184.18   10.40
  -6  -2   9  166.28    9.50
  -6  -2   9  172.88    9.80
  -6   2   9  182.38    8.50
  -6   2   9  169.88    8.90
  -6   2   9  181.68   10.40
  -6   2   9  180.58    8.60
  -5  -2   9  157.68    8.60
  -5  -2   9  167.08    8.70
  -5  -2   9  151.18    8.40
  -5  -2   9  159.08    7.70
  -5   2   9  162.78    7.00
  -5   2   9  157.38    9.00
  -5   2   9  167.78    7.90
  -5   2   9  160.88    7.60
  -4  -2   9   34.60    3.60
  -4  -2   9   36.30    4.40
  -4  -2   9   32.40    4.40
  -4   2   9   32.80    4.10
  -4   2   9   26.60    3.20
  -4   2   9   39.80    3.60
  -4   2   9   31.70    4.60
   3  -2  -9  218.18    6.90
  -3  -2   9  203.78    7.90
  -3  -2   9  210.98    8.20
  -3   2   9  217.08    6.80
  -3   2   9  227.18    8.80
  -3   2   9  215.98    8.00
  -3   2   9  213.48    5.80
  -2  -2   9  187.48    7.00
   2  -2  -9  173.08    5.20
  -2  -2   9  174.28    6.70
  -2   2   9  174.48    4.10
   2   2  -9  176.28    6.70
  -2   2   9  178.38    6.90
   2   2  -9  173.48    5.40
  -2   2   9  167.58    4.80
   1  -2  -9   37.80    3.50
   1  -2  -9   42.80    2.10
  -1  -2   9   41.50    3.60
   1  -2  -9   44.50    1.70
  -1  -2   9   39.60    3.20
  -1   2   9   41.00    1.70
   1   2  -9   39.10    3.40
   1   2  -9   42.00    3.00
  -1   2   9   39.10    3.60
   0  -2  -9  149.88    3.20
   0  -2  -9  156.18    5.70
   0  -2  -9  147.29    3.70
   0  -2   9  154.18    5.30
   0  -2   9  151.98    5.60
   0   2   9  155.98    3.60
   0   2  -9  154.78    5.50
   0   2  -9  156.28    5.60
   0   2   9  158.88    5.90
  -1  -2  -9   41.80    3.30
   1  -2   9   37.80    3.40
  -1  -2  -9   40.20    2.40
   1  -2   9   43.10    3.20
  -1  -2  -9   39.00    2.60
  -1   2  -9   37.70    3.50
   1   2   9   41.60    2.60
   1   2   9   48.10    3.30
  -1   2  -9   42.80    3.50
   2  -2   9  174.08    6.70
  -2  -2  -9  171.18    5.90
  -2  -2  -9  179.08    6.50
  -2  -2  -9  169.98    6.20
   2  -2   9  176.98    6.70
  -2   2  -9  173.78    6.80
   2   2   9  168.38    5.60
  -2   2  -9  179.28    7.10
   2   2   9  176.18    6.00
  -3  -2  -9  229.38    8.10
  -3  -2  -9  240.58    8.60
  -3  -2  -9  224.68    7.80
   3  -2   9  226.68    8.50
   3  -2   9  229.88    8.40
  -3   2  -9  230.58    9.00
   3   2   9  217.48    7.80
  -3   2  -9  220.98    8.50
   4  -2   9   36.20    4.50
  -4  -2  -9   36.10    4.40
  -4  -2  -9   38.90    4.40
   4  -2   9   37.80    4.50
  -4  -2  -9   36.90    4.10
  -4   2  -9   35.50    4.70
  -4   2  -9   33.10    4.20
   4   2   9   43.10    4.70
  -5  -2  -9  157.48    8.50
  -5  -2  -9  156.48    7.50
   5  -2   9  159.98    8.80
   5  -2   9  148.69    8.00
  -5  -2  -9  162.48    8.90
  -5   2  -9  158.38    9.10
  -5   2  -9  172.78    9.10
   5   2   9  160.08    8.50
  -6  -2  -9  155.68    8.30
   6  -2   9  151.08    9.10
  -6  -2  -9  160.68   10.00
  -6  -2  -9  193.68   10.20
  -6   2  -9  180.18   10.30
  -6   2  -9  172.08   10.00
   6   2   9  187.78   10.00
   7  -2   9   29.90    5.70
  -7  -2  -9   24.30    6.10
  -7  -2  -9   31.80    5.80
  -7   2  -9   32.30    6.40
  -7   2  -9   28.70    5.40
  -8  -2  -9   41.70    7.40
   8  -2   9   31.70    6.40
  -8   2  -9   40.80    7.20
  -9  -2  -9   65.29    9.70
   9  -2   9   68.59    9.50
  -9   2  -9   66.09    9.30
  -9  -3   9    4.10    5.10
  -9  -3   9    1.50    4.80
  -9   3   9    3.10    5.20
  -9   3   9    3.70    4.90
  -8  -3   9    9.40    4.80
  -8  -3   9    0.00    4.00
  -8   3   9    9.50    5.20
  -7  -3   9  126.59    9.50
  -7  -3   9  107.19    9.70
  -7  -3   9  116.19    9.80
  -7   3   9  122.59   10.70
  -7   3   9  105.39    8.70
  -6  -3   9  199.78   11.20
  -6  -3   9  175.98   10.30
  -6  -3   9  185.98   10.40
  -6   3   9  198.18    9.60
  -6   3   9  199.08   11.20
  -6   3   9  180.88    9.50
  -5  -3   9  185.48    9.90
  -5  -3   9  184.88    9.70
  -5   3   9  189.48    8.70
  -5   3   9  190.68   10.20
  -5   3   9  188.18    8.80
  -4  -3   9   20.30    3.80
  -4  -3   9   22.30    4.00
   4  -3  -9   17.80    3.20
  -4   3   9   16.50    2.80
  -4   3   9   13.30    3.10
  -4   3   9   16.60    3.70
  -3  -3   9  227.08    9.30
   3  -3  -9  218.88    7.50
  -3  -3   9  241.18    9.40
  -3   3   9  205.18    6.90
  -3   3   9  210.38    9.10
  -3   3   9  214.18    5.30
  -3   3   9  228.98    8.70
   2  -3  -9  101.39    4.40
  -2  -3   9  116.39    6.30
  -2  -3   9  104.99    6.00
  -2   3   9  109.19    4.40
   2   3  -9  108.69    4.20
  -2   3   9  101.89    5.90
   2   3  -9  110.89    6.10
  -1  -3   9  303.37    9.20
   1  -3  -9  293.67    7.00
  -1  -3   9  317.17    9.40
   1   3  -9  306.77    7.60
  -1   3   9  321.47    9.70
  -1   3   9  297.97    6.50
   1   3  -9  312.77    9.40
   0  -3   9    4.80    1.70
   0  -3  -9    5.10    1.50
   0  -3  -9    3.50    1.70
   0  -3   9    3.50    1.70
   0   3  -9    5.20    2.10
   0   3   9    1.80    1.70
   0   3  -9    4.10    1.60
   0   3   9    5.00    1.10
  -1  -3  -9  316.37    8.60
  -1  -3  -9  294.87    7.90
   1  -3   9  298.97    8.90
   1  -3   9  304.07    9.10
   1   3   9  307.97    8.90
  -1   3  -9  305.77    9.40
  -1   3  -9  316.07    9.00
   2  -3   9  110.09    5.80
   2  -3   9  115.39    6.30
  -2  -3  -9  112.09    5.30
  -2  -3  -9  107.29    5.50
  -2   3  -9  109.89    6.30
  -2   3  -9  110.39    6.10
   3  -3   9  224.48    8.60
  -3  -3  -9  209.68    8.50
  -3  -3  -9  213.58    7.50
  -3  -3  -9  212.98    8.00
   3  -3   9  223.88    9.00
  -3   3  -9  226.48    9.10
  -3   3  -9  208.28    8.90
   4  -3   9   15.30    3.70
  -4  -3  -9   20.60    3.20
  -4  -3  -9   16.70    3.10
  -4  -3  -9   18.30    3.60
   4  -3   9   18.10    3.40
  -4   3  -9   21.90    4.20
  -4   3  -9   14.10    3.00
   5  -3   9  197.88    9.60
  -5  -3  -9  190.98    9.50
  -5  -3  -9  180.68    7.90
  -5  -3  -9  185.38    9.70
   5  -3   9  185.38    9.80
  -5   3  -9  193.28    9.70
  -5   3  -9  193.58   10.30
  -6  -3  -9  194.68   10.50
  -6  -3  -9  216.58   11.60
   6  -3   9  197.48   10.70
   6  -3   9  202.78   10.40
  -6   3  -9  201.68   10.90
  -6   3  -9  209.08   11.50
   7  -3   9  115.99    9.20
   7  -3   9   97.99    9.50
  -7  -3  -9  106.39   10.20
  -7  -3  -9  102.69    9.60
  -7   3  -9  126.99   10.40
  -7   3  -9  123.09   10.00
  -8  -3  -9    6.10    4.80
   8  -3   9    4.60    4.70
  -8   3  -9    9.60    5.60
   9  -3   9   11.50    6.00
  -9  -3  -9    8.60    5.70
  -9   3  -9   13.40    6.20
  -9  -4   9    5.20    5.40
  -9  -4   9    3.00    5.50
  -9   4   9    4.50    5.50
  -8  -4   9   10.70    5.40
  -8  -4   9   22.60    6.00
  -8   4   9   10.80    5.70
  -7  -4   9   10.30    5.00
  -7  -4   9   16.20    4.80
  -7  -4   9    9.40    4.90
  -7   4   9   16.20    5.40
   6  -4  -9  130.99    8.60
  -6  -4   9  134.59    9.70
  -6  -4   9  130.19    9.70
  -6   4   9  143.19    9.00
  -6   4   9  133.69   10.20
  -6   4   9  133.49    8.60
  -5  -4   9   13.30    3.90
   5  -4  -9   16.10    3.90
  -5  -4   9   25.10    5.00
  -5   4   9   17.90    4.00
  -5   4   9   13.30    3.60
  -5   4   9   26.90    5.00
   4  -4  -9   97.79    6.10
  -4  -4   9   91.89    6.90
  -4  -4   9   99.09    7.50
  -4   4   9  101.89    6.10
  -4   4   9   92.79    6.50
  -4   4   9   90.79    7.40
  -3  -4   9   12.60    3.10
  -3  -4   9   14.80    3.50
   3  -4  -9    6.50    2.20
  -3   4   9   12.70    3.00
  -3   4   9    4.70    2.90
  -3   4   9    8.10    2.20
   3   4  -9    7.90    2.70
   2  -4  -9    6.80    2.10
  -2  -4   9    9.50    2.80
  -2  -4   9    9.30    2.90
  -2   4   9    9.80    2.80
   2   4  -9   10.10    1.90
  -2   4   9    5.30    1.80
  -2   4   9   12.40    2.90
   2   4  -9   10.10    2.90
   1  -4  -9  610.34   12.50
  -1  -4   9  627.74   14.80
  -1  -4   9  629.34   15.20
  -1   4   9  649.43   15.50
  -1   4   9  622.54   12.00
   1   4  -9  650.73   15.70
   1   4  -9  633.94   11.90
   0  -4   9  568.54   13.50
   0  -4  -9  546.25   11.80
   0  -4  -9  554.14    8.70
   0  -4   9  557.04   13.70
   0   4   9  570.64   11.40
   0   4  -9  561.54   11.90
   0   4  -9  574.94   14.60
   0   4   9  616.24   14.60
  -1  -4  -9  635.94   13.50
   1  -4   9  628.64   14.50
  -1  -4  -9  616.64   11.50
  -1  -4  -9  634.94   13.70
   1  -4   9  639.14   15.10
  -1   4  -9  623.14   15.20
  -1   4  -9  629.34   13.90
   2  -4   9   12.70    2.80
  -2  -4  -9    7.10    2.40
   2  -4   9    5.30    2.50
  -2  -4  -9    7.00    2.00
  -2   4  -9   15.00    3.20
  -2   4  -9   11.60    3.10
   3  -4   9   10.30    3.00
  -3  -4  -9    7.00    2.80
   3  -4   9    9.50    2.90
  -3  -4  -9    9.80    2.40
  -3   4  -9    6.20    2.90
  -3   4  -9   13.00    3.30
   4  -4   9   94.29    6.90
   4  -4   9   90.59    6.60
  -4  -4  -9   97.99    6.70
  -4  -4  -9   92.99    7.10
  -4   4  -9  105.39    7.30
  -4   4  -9  106.09    7.70
   5  -4   9   21.40    4.50
   5  -4   9   17.70    4.10
  -5  -4  -9    9.30    3.70
  -5  -4  -9   16.90    4.00
  -5   4  -9   22.50    4.50
  -5   4  -9   17.10    4.30
   6  -4   9  135.89   10.00
   6  -4   9  135.49    9.10
  -6  -4  -9  132.19    9.40
  -6  -4  -9  141.69   10.30
  -6   4  -9  125.29    9.40
  -6   4  -9  119.19    9.80
  -7  -4  -9    6.40    4.80
  -7  -4  -9    2.90    3.90
   7  -4   9   12.70    4.70
   7  -4   9    5.80    4.30
  -7   4  -9   12.20    5.00
  -7   4  -9   10.50    5.20
  -8  -4  -9   15.20    6.60
   8  -4   9   14.00    5.50
   8  -4   9   20.60    6.10
  -8   4  -9   15.90    6.40
   9  -4   9    4.90    4.80
  -9  -4  -9   -4.30    5.30
  -9   4  -9   12.20    6.90
  -9  -5   9   10.60    5.60
  -9  -5   9   14.90    7.00
  -9   5   9    9.00    6.60
  -8  -5   9   38.00    8.20
  -8  -5   9   43.80    7.60
  -8   5   9   43.40    8.20
  -7  -5   9    4.80    4.50
  -7  -5   9   -2.70    3.40
  -7   5   9   -2.40    4.10
   6  -5  -9   74.29    7.90
  -6  -5   9   76.79    9.10
  -6  -5   9   81.49    8.80
  -6   5   9   78.59    8.00
  -6   5   9   75.29    9.10
  -5  -5   9  248.38   12.80
   5  -5  -9  249.88   11.20
  -5  -5   9  224.88   11.60
  -5   5   9  244.88   13.90
  -5   5   9  273.37   13.50
  -5   5   9  240.28   11.30
   4  -5  -9   38.00    4.90
  -4  -5   9   41.30    5.90
  -4  -5   9   34.90    5.50
  -4   5   9   27.20    3.90
  -4   5   9   21.80    4.20
  -4   5   9   35.90    5.80
  -3  -5   9  159.78    9.30
   3  -5  -9  164.98    7.80
  -3  -5   9  160.08    8.60
  -3   5   9  169.48    9.40
   3   5  -9  169.18    9.40
  -3   5   9  179.88    9.00
  -3   5   9  153.58    7.30
   2  -5  -9   28.40    3.80
  -2  -5   9   29.90    4.60
  -2  -5   9   32.10    4.40
  -2   5   9   33.50    3.60
  -2   5   9   34.80    4.80
  -2   5   9   28.90    4.50
   2   5  -9   33.00    4.70
  -1  -5   9    0.90    2.10
  -1  -5   9    3.70    2.40
   1  -5  -9    2.70    1.90
  -1   5   9    2.90    2.30
  -1   5   9    1.50    2.10
   1   5  -9   -2.40    1.90
   1   5  -9    2.20    1.60
  -1   5   9    1.10    1.50
   0  -5   9    4.30    2.40
   0  -5   9    8.70    2.50
   0  -5  -9    8.30    2.40
   0   5   9    5.60    2.00
   0   5  -9    8.50    2.30
   0   5  -9    7.70    2.70
  -1  -5  -9    2.30    1.40
  -1  -5  -9    0.90    1.90
   1  -5   9    1.00    2.20
   1  -5   9    2.10    2.10
  -1   5  -9    0.20    2.20
   1   5   9    2.70    1.60
  -1   5  -9    0.80    2.00
   2  -5   9   41.70    4.70
   2  -5   9   30.90    4.50
  -2  -5  -9   25.80    4.00
  -2  -5  -9   29.10    3.40
  -2  -5  -9   33.90    3.50
  -2   5  -9   30.60    4.30
  -2   5  -9   32.40    4.70
  -3  -5  -9  177.08    9.10
   3  -5   9  175.98    9.30
   3  -5   9  161.78    8.20
  -3  -5  -9  165.88    7.60
  -3   5  -9  178.88    9.50
  -3   5  -9  171.08    9.10
   4  -5   9   27.10    5.00
  -4  -5  -9   36.50    4.90
  -4  -5  -9   39.30    5.70
   4  -5   9   38.50    5.10
  -4   5  -9   39.50    6.00
  -4   5  -9   38.90    5.60
  -5  -5  -9  260.57   11.80
  -5  -5  -9  273.27   13.20
   5  -5   9  235.48   12.00
  -5  -5  -9  239.78   11.00
   5  -5   9  233.78   11.10
  -5   5  -9  239.58   12.00
  -5   5  -9  241.58   12.30
   6  -5   9   66.49    7.50
  -6  -5  -9   71.79    8.60
  -6  -5  -9   64.49    7.40
  -6  -5  -9   80.89    8.10
   6  -5   9   75.39    8.70
  -6   5  -9   75.09    8.90
  -6   5  -9   68.59    8.10
   7  -5   9   -0.80    4.00
  -7  -5  -9    3.40    3.80
   7  -5   9    3.20    4.30
  -7  -5  -9    3.90    3.90
  -7  -5  -9    3.90    4.60
  -7   5  -9    4.40    5.00
  -8  -5  -9   45.30    7.80
   8  -5   9   29.90    7.00
   8  -5   9   44.80    8.00
  -8  -5  -9   37.00    8.10
  -8   5  -9   39.40    7.80
  -9  -5  -9    8.30    6.00
   9  -5   9    8.20    6.60
  -9  -5  -9   -1.10    5.60
  -9   5  -9   -0.70    6.30
  -8  -6   9   25.40    6.70
  -8  -6   9   19.00    7.30
  -8   6   9   21.10    7.20
   7  -6  -9   12.00    5.20
  -7  -6   9   10.50    5.00
  -7  -6   9    8.20    5.00
  -7   6   9   11.10    5.70
  -6  -6   9  151.78   11.90
  -6  -6   9  147.99   11.20
   6  -6  -9  146.09   10.60
  -6   6   9  139.39   11.30
  -6   6   9  140.49    9.80
  -5  -6   9   31.60    6.00
   5  -6  -9   37.40    6.00
  -5  -6   9   32.40    6.30
  -5   6   9   29.70    5.40
  -5   6   9   38.90    6.80
  -4  -6   9   18.70    4.40
   4  -6  -9   23.60    4.60
  -4  -6   9   18.70    5.00
  -4   6   9   17.40    4.70
  -4   6   9   24.10    4.90
  -3  -6   9  155.18    9.70
   3  -6  -9  141.29    7.80
  -3  -6   9  117.69    8.00
  -3   6   9  141.39    9.40
  -3   6   9  138.19    8.10
   3   6  -9  153.18    9.40
  -3   6   9  131.79    8.50
  -2  -6   9  101.49    7.20
   2  -6  -9  101.19    6.50
  -2  -6   9  100.19    7.70
  -2   6   9  103.49    6.30
   2   6  -9  103.19    7.90
  -2   6   9  107.59    7.70
  -1  -6   9  143.09    7.90
   1  -6  -9  133.19    7.00
  -1  -6   9  133.09    8.30
  -1   6   9  146.69    8.00
   1   6  -9  144.09    8.60
  -1   6   9  133.69    7.00
   0  -6  -9  190.58    8.40
   0  -6   9  196.98    9.50
   0  -6   9  193.88    8.90
   0   6  -9  216.38   10.30
   0   6  -9  205.38    7.80
   0   6   9  197.48    8.20
   0   6   9  207.78    8.70
   1  -6   9  133.99    7.40
  -1  -6  -9  119.99    7.30
   1  -6   9  124.59    8.00
  -1   6  -9  119.79    8.00
  -1   6  -9  125.49    6.90
   1   6   9  133.99    7.10
   2  -6   9  122.19    7.20
   2  -6   9   93.79    7.40
  -2  -6  -9   97.99    7.30
  -2  -6  -9   86.49    6.70
  -2   6  -9   97.79    7.60
  -2   6  -9   93.79    6.90
  -3  -6  -9  138.39    9.10
   3  -6   9  158.08    9.50
   3  -6   9  143.69    8.30
  -3  -6  -9  137.09    7.60
  -3   6  -9  129.89    8.80
  -3   6  -9  150.18    9.00
   4  -6   9   15.10    4.10
  -4  -6  -9   21.70    4.40
   4  -6   9   14.80    4.30
  -4  -6  -9   13.90    4.50
  -4   6  -9   17.80    4.30
  -4   6  -9   17.60    5.00
  -5  -6  -9   31.20    5.40
   5  -6   9   38.30    5.90
  -5  -6  -9   47.40    6.50
   5  -6   9   40.20    6.20
  -5  -6  -9   32.30    6.00
  -5   6  -9   23.10    5.20
  -5   6  -9   30.50    6.50
  -6  -6  -9  148.09   10.30
  -6  -6  -9  138.09   10.40
   6  -6   9  136.19   10.70
  -6  -6  -9  146.89   11.50
   6  -6   9  157.28   10.30
  -6   6  -9  170.68   12.40
  -7  -6  -9    4.10    5.40
  -7  -6  -9   -0.40    3.80
   7  -6   9   17.50    5.30
   7  -6   9   11.90    5.40
  -7   6  -9    8.80    5.90
  -8  -6  -9   21.30    6.60
   8  -6   9   29.00    6.70
  -8  -6  -9   11.50    6.70
   8  -6   9   23.30    6.50
  -8   6  -9   18.50    6.90
  -8  -7   9    2.90    5.90
  -8  -7   9    0.10    5.30
  -8   7   9    3.80    6.50
  -7  -7   9    6.30    5.50
  -7  -7   9    9.10    5.50
  -7   7   9   10.10    5.80
  -6  -7   9    3.30    4.30
  -6  -7   9   13.50    5.40
   6  -7  -9    4.20    5.20
  -6   7   9    7.50    5.10
  -5  -7   9   12.20    5.10
  -5  -7   9    6.00    4.50
   5  -7  -9   10.40    4.60
  -5   7   9    5.90    4.30
  -4  -7   9   11.40    4.50
  -4  -7   9   10.90    4.30
   4  -7  -9    8.20    3.70
  -4   7   9   11.30    4.60
   4   7  -9   -1.00    2.90
   3  -7  -9   28.40    5.10
  -3  -7   9   38.20    6.10
  -3  -7   9   26.30    5.40
   3   7  -9   30.40    5.90
  -3   7   9   37.40    6.10
   2  -7  -9  153.88    8.80
  -2  -7   9  167.78    9.60
  -2  -7   9  147.69   10.10
   2   7  -9  165.18   10.60
  -2   7   9  182.88   10.50
  -1  -7   9  299.87   11.90
   1  -7  -9  296.37   11.40
  -1  -7   9  296.67   12.80
   1   7  -9  280.87   13.00
  -1   7   9  293.87   11.80
   0  -7  -9    0.00    2.20
   0  -7   9   -1.60    2.50
   0  -7   9    0.50    2.60
   0   7  -9    6.20    3.30
   0   7   9    1.80    2.40
   0   7   9    6.10    3.10
   1  -7   9  300.57   13.00
   1  -7   9  284.07   11.30
  -1  -7  -9  303.17   12.00
  -1   7  -9  309.87   13.60
  -1   7  -9  298.97   11.10
   1   7   9  307.17   11.70
  -2  -7  -9  151.88    9.50
   2  -7   9  164.08   10.20
   2  -7   9  166.18    9.10
  -2   7  -9  155.98    9.20
  -2   7  -9  161.78   10.40
   3  -7   9   34.10    5.20
   3  -7   9   36.70    6.00
  -3  -7  -9   27.90    5.40
  -3   7  -9   40.70    5.90
  -3   7  -9   31.10    5.80
   4  -7   9   11.80    3.80
  -4  -7  -9   20.50    5.50
   4  -7   9    5.70    4.10
  -4  -7  -9   10.70    4.20
  -4   7  -9   14.50    5.10
  -4   7  -9    6.10    3.70
   5  -7   9    7.80    4.00
  -5  -7  -9    2.50    4.80
   5  -7   9   12.70    4.50
  -5  -7  -9   15.00    4.40
  -5   7  -9   11.20    5.30
  -6  -7  -9   15.40    5.40
   6  -7   9   15.90    5.40
  -6  -7  -9    0.00    3.80
   6  -7   9    7.50    4.50
  -6   7  -9    3.50    5.50
   7  -7   9    1.00    4.80
   7  -7   9    2.60    4.90
  -7  -7  -9    2.30    4.60
  -7  -7  -9    0.70    5.20
  -7   7  -9    8.10    6.70
   8  -7   9    6.40    5.90
  -8  -7  -9   -4.40    3.90
  -8  -7  -9    9.80    6.90
  -8   7  -9    4.90    7.30
  -7  -8   9   -1.30    4.80
  -7  -8   9    4.50    6.20
  -7   8   9    2.70    6.00
  -6  -8   9   12.20    6.10
  -6  -8   9   10.10    6.10
  -6   8   9   15.60    6.60
  -5  -8   9   79.79    9.50
  -5  -8   9   53.99    8.90
  -5   8   9   61.89    9.00
   4  -8  -9    9.50    4.90
  -4  -8   9   25.10    6.00
  -4  -8   9   15.00    5.70
  -4   8   9   28.20    6.30
  -3  -8   9  137.79   10.50
  -3  -8   9  170.68   10.60
   3  -8  -9  138.99   10.00
  -3   8   9  144.39   10.70
   3   8  -9  147.49   11.30
  -2  -8   9   67.39    7.60
  -2  -8   9   47.60    7.30
   2  -8  -9   56.69    6.70
  -2   8   9   71.39    8.00
   2   8  -9   65.59    8.30
  -1  -8   9   89.09    8.90
   1  -8  -9   97.39    8.10
  -1  -8   9   89.39    8.20
   1   8  -9  101.49    9.70
  -1   8   9  101.09    8.80
   0  -8   9  110.59    8.80
   0  -8  -9  120.39    8.50
   0  -8   9  128.09    8.50
   0   8  -9  121.39    9.90
  -1  -8  -9   92.39    8.50
   1  -8   9   94.19    8.20
   1  -8   9   89.09    8.90
  -1   8  -9   96.59    9.30
   2  -8   9   57.89    6.60
  -2  -8  -9   75.69    8.40
   2  -8   9   63.79    7.90
  -2   8  -9   59.09    7.70
  -3  -8  -9  155.38   10.90
   3  -8   9  153.18    9.70
   3  -8   9  144.09   10.70
  -3   8  -9  166.58   11.60
  -3   8  -9  158.88   10.50
   4  -8   9   23.20    5.30
  -4  -8  -9   26.50    6.70
   4  -8   9   24.60    5.70
  -4   8  -9   17.40    5.50
   5  -8   9   58.29    7.60
   5  -8   9   55.19    8.20
  -5  -8  -9   58.99    8.80
  -5   8  -9   62.69    8.90
   6  -8   9   11.90    5.70
  -6  -8  -9   14.70    6.30
  -6   8  -9   14.90    6.50
   7  -8   9   -0.50    5.50
  -7  -8  -9    9.30    6.70
  -7  -8  -9    4.50    5.50
  -7   8  -9    3.20    6.40
  -6  -9   9    3.20    5.70
  -6  -9   9    3.50    5.70
  -6   9   9    4.00    6.00
  -5  -9   9   31.80    7.30
  -5  -9   9   14.20    6.80
  -5   9   9   16.30    6.60
  -4  -9   9    5.60    5.10
  -4  -9   9    2.20    4.60
  -4   9   9    2.90    4.80
  -3  -9   9    6.80    3.90
  -3  -9   9   25.20    6.50
  -3   9   9   22.40    6.00
  -2  -9   9   58.59    8.50
   2  -9  -9   62.69    7.60
  -2  -9   9   76.89    8.50
  -1  -9   9   98.89    9.80
   1  -9  -9   81.69    8.40
  -1  -9   9   94.79    8.90
   0  -9   9   -1.60    3.40
   0  -9   9   -1.80    3.20
   0  -9  -9    2.50    3.50
   1  -9   9   77.29    9.10
   1  -9   9   77.49    8.10
  -1  -9  -9   89.49    8.90
  -2  -9  -9   79.09    8.70
   2  -9   9   68.29    8.70
   2  -9   9   69.19    7.70
   3  -9   9   11.60    4.60
  -3  -9  -9   31.50    6.90
   3  -9   9   13.90    5.20
  -4  -9  -9   -0.60    5.10
   4  -9   9    9.30    4.60
  -4   9  -9    9.00    5.60
  -5  -9  -9   17.00    6.60
   5  -9   9   12.40    5.60
  -5   9  -9   23.90    7.30
   6  -9   9   -1.90    5.50
  -6  -9  -9   -6.10    5.60
  -6   9  -9   -4.80    5.60
  -5 -10   9   15.30    6.00
  -5 -10   9    0.90    6.20
  -5  10   9   10.40    6.80
  -4 -10   9    1.50    4.90
  -4 -10   9   -0.20    5.20
  -4  10   9   -3.60    5.40
  -3 -10   9    2.10    4.60
  -3 -10   9   -0.20    4.60
  -2 -10   9    3.50    4.30
  -2 -10   9    1.50    4.80
  -1 -10   9   24.70    6.10
  -1 -10   9   35.00    6.30
   0 -10   9   47.00    7.00
   0 -10  -9   43.70    7.60
   0 -10   9   63.89    9.10
   1 -10   9   27.80    6.50
   1 -10   9   36.60    6.40
  -1 -10  -9   28.70    6.30
   2 -10   9    5.70    4.90
  -2 -10  -9    0.30    4.20
   3 -10   9   10.10    5.60
  -3 -10  -9   -3.10    4.80
   4 -10   9    8.40    5.90
  -4 -10  -9    0.60    6.00
   5 -10   9   17.60    7.30
  -5 -10  -9    9.60    7.10
  -5  10  -9   14.30    7.10
  -3 -11   9    3.60    5.60
  -3 -11   9    1.70    5.20
  -2 -11   9   16.00    6.40
  -2 -11   9   30.00    7.60
  -1 -11   9   -3.70    4.00
  -1 -11   9   -3.10    5.50
   0 -11   9   -0.50    4.80
   1 -11   9   -0.30    5.10
   2 -11   9   34.00    8.00
   3 -11   9    8.00    6.20
  -3 -11  -9    7.80    6.10
 -10   0  10    3.60    5.80
  -9   0  10   36.50    7.70
  -9   0  10   31.30    6.40
  -8   0  10   71.59    9.00
  -8   0  10   87.49    8.90
  -8   0  10   77.99    8.60
  -7   0  10   60.59    7.10
  -7   0  10   78.59    7.90
  -7   0  10   68.09    7.70
  -7   0  10   65.69    7.00
  -6   0  10   20.40    4.10
  -6   0  10   17.80    4.10
  -6   0  10   13.30    3.90
  -6   0  10   16.40    3.60
  -6   0  10   23.20    4.00
  -5   0  10   -1.40    2.00
  -5   0  10   -0.40    1.80
  -5   0  10    1.30    2.20
  -5   0  10    0.80    2.00
  -5   0  10   -2.20    1.90
  -4   0  10  234.78    8.60
  -4   0  10  218.38    8.10
  -4   0  10  212.18    8.00
  -4   0  10  232.28    8.50
  -4   0  10  223.68    8.70
  -3   0  10  174.88    6.50
  -3   0  10  176.48    6.50
  -3   0  10  170.98    7.00
  -3   0  10  176.98    6.30
  -2   0  10 1792.72   23.50
  -2   0  10 1759.52   26.40
  -2   0  10 1770.32   24.60
   2   0 -10 1715.93   25.70
   1   0 -10 1396.66   21.40
  -1   0  10 1385.36   19.50
  -1   0  10 1383.96   21.40
  -1   0  10 1400.06   17.80
   1   0 -10 1427.96   17.90
   0   0  10   77.39    2.70
   0   0 -10   77.39    4.10
   0   0  10   82.89    3.50
   0   0  10   75.09    3.80
   0   0 -10   79.59    2.70
   1   0  10 1383.96   20.20
  -1   0 -10 1411.76   21.80
   1   0  10 1402.36   19.60
   1   0  10 1406.76   18.30
  -1   0 -10 1367.26   18.90
  -2   0 -10 1788.72   26.80
   2   0  10 1739.83   24.40
   2   0  10 1794.32   25.80
  -2   0 -10 1759.82   25.00
   2   0  10 1757.62   22.60
   3   0  10  167.58    4.10
  -3   0 -10  165.78    7.30
  -3   0 -10  168.88    6.80
   3   0  10  165.48    6.80
  -4   0 -10  243.48    9.20
  -4   0 -10  222.08    8.90
   4   0  10  227.18    8.80
   5   0  10   -1.10    1.70
  -5   0 -10    2.20    2.00
  -5   0 -10   -0.90    2.30
  -6   0 -10   17.20    4.30
   6   0  10   14.70    3.70
  -6   0 -10   18.20    4.20
  -7   0 -10   73.89    8.60
  -7   0 -10   71.49    7.80
   7   0  10   69.19    7.70
  -7   0 -10   58.49    7.20
  -8   0 -10   76.89    8.60
   8   0  10   77.69    9.30
  -8   0 -10   84.39   10.10
  -9   0 -10   20.90    7.10
   9   0  10   35.90    7.40
 -10   0 -10    2.50    6.20
 -10  -1  10    2.40    6.00
 -10  -1  10    3.50    5.30
 -10   1  10    4.50    5.80
  -9  -1  10   51.39    8.90
  -9  -1  10   43.30    7.70
  -9   1  10   48.50    8.60
  -8  -1  10    1.80    4.30
  -8  -1  10    3.20    3.70
  -8  -1  10   -1.10    4.00
  -8   1  10    3.70    4.20
  -8   1  10   -1.60    4.20
  -8   1  10   -0.70    3.80
  -7  -1  10  214.18   11.30
  -7  -1  10  231.88   12.30
  -7  -1  10  216.08   11.60
  -7   1  10  216.98   11.70
  -7   1  10  213.18   11.10
  -7   1  10  221.08   11.00
  -7   1  10  228.38   11.80
  -6  -1  10   67.59    6.50
  -6  -1  10   63.59    6.60
  -6  -1  10   60.29    6.60
  -6  -1  10   63.99    6.70
  -6  -1  10   53.79    5.50
  -6   1  10   68.89    6.80
  -6   1  10   62.49    6.20
  -6   1  10   55.89    5.80
  -6   1  10   69.79    5.60
  -6   1  10   58.29    6.60
  -5  -1  10   40.80    5.00
  -5  -1  10   49.60    5.10
  -5  -1  10   47.40    5.10
  -5  -1  10   53.29    5.20
  -5  -1  10   48.80    5.40
  -5   1  10   45.40    4.70
  -5   1  10   45.80    4.90
  -5   1  10   47.40    5.50
  -5   1  10   56.09    5.50
  -5   1  10   61.19    5.50
  -4  -1  10   71.29    5.00
  -4  -1  10   72.79    5.30
  -4  -1  10   75.79    5.20
  -4  -1  10   63.99    5.10
  -4  -1  10   70.69    5.40
  -4   1  10   75.39    4.80
  -4   1  10   78.99    5.30
  -4   1  10   72.79    4.50
  -4   1  10   72.19    4.80
  -4   1  10   73.39    5.80
  -3  -1  10 1641.34   25.50
  -3  -1  10 1621.44   25.90
  -3   1  10 1576.94   25.50
  -3   1  10 1593.64   22.90
  -3   1  10 1602.54   23.40
  -3   1  10 1542.35   22.70
  -2  -1  10   64.29    3.70
  -2  -1  10   67.69    4.10
  -2   1  10   62.99    2.90
  -2   1  10   61.09    4.20
  -2   1  10   58.49    2.90
  -2   1  10   58.99    3.10
   2   1 -10   59.99    3.80
  -1  -1  10  702.23   12.90
  -1  -1  10  695.43   11.60
   1  -1 -10  689.23   13.70
   1   1 -10  702.33   13.10
  -1   1  10  687.93   13.50
   1   1 -10  731.83   12.30
  -1   1  10  700.53    8.50
  -1   1  10  690.93    8.60
  -1   1  10  694.43   10.50
   0  -1 -10   25.80    2.80
   0  -1  10   23.10    2.10
   0  -1  10   24.50    2.50
   0   1 -10   18.60    2.00
   0   1  10   21.00    1.90
   0   1  10   22.90    2.60
   0   1 -10   23.30    2.70
  -1  -1 -10  707.83   10.90
   1  -1  10  717.03   13.40
   1  -1  10  714.33   12.20
  -1  -1 -10  732.93   14.00
  -1  -1 -10  721.43   11.00
   1   1  10  704.13   11.90
  -1   1 -10  700.53   12.50
   1   1  10  691.73   11.50
  -1   1 -10  670.63   13.50
   1   1  10  690.53   12.30
  -2  -1 -10   60.79    3.50
   2  -1  10   66.79    4.20
   2  -1  10   62.89    4.10
  -2  -1 -10   64.29    3.70
  -2  -1 -10   63.69    4.40
  -2   1 -10   61.19    4.00
   2   1  10   65.99    4.00
   2   1  10   62.29    3.30
  -2   1 -10   57.29    4.50
  -3  -1 -10 1587.24   25.80
  -3  -1 -10 1645.54   25.40
   3  -1  10 1611.64   26.10
  -3  -1 -10 1634.14   25.70
   3  -1  10 1648.54   25.90
   3   1  10 1612.64   25.40
  -3   1 -10 1589.64   25.90
  -3   1 -10 1602.74   26.60
   3   1  10 1596.64   20.70
  -4  -1 -10   79.99    5.30
  -4  -1 -10   67.09    5.30
   4  -1  10   68.79    5.40
   4  -1  10   75.29    5.60
  -4  -1 -10   68.99    5.30
   4   1  10   84.09    5.50
  -4   1 -10   67.89    5.20
  -4   1 -10   72.19    6.00
  -5  -1 -10   51.79    5.40
   5  -1  10   48.60    5.30
  -5  -1 -10   41.10    5.00
  -5  -1 -10   40.40    5.30
  -5   1 -10   58.49    6.00
   5   1  10   47.80    5.70
  -5   1 -10   50.39    5.60
  -6  -1 -10   70.59    7.10
  -6  -1 -10   69.89    6.80
  -6  -1 -10   62.09    7.00
   6  -1  10   65.39    7.00
  -6   1 -10   69.39    7.20
  -6   1 -10   62.79    6.90
   6   1  10   57.79    6.60
   7  -1  10  217.48   11.60
  -7  -1 -10  229.48   13.00
  -7  -1 -10  227.58   12.30
  -7  -1 -10  239.68   11.70
   7   1  10  205.88   11.30
  -7   1 -10  218.88   12.20
  -7   1 -10  208.58   11.90
  -8  -1 -10    2.90    4.20
   8  -1  10    1.90    4.10
   8   1  10    3.50    3.50
  -8   1 -10    2.70    4.40
   9  -1  10   62.39    9.40
  -9  -1 -10   46.60    8.60
  -9   1 -10   34.90    7.30
  -9   1 -10   57.29    9.20
 -10  -1 -10   -1.10    6.00
  10  -1  10    3.90    5.60
 -10   1 -10    6.10    6.80
  -9  -2  10   20.90    6.10
  -9  -2  10   22.00    6.60
  -9   2  10   18.10    6.10
  -9   2  10   29.20    6.90
  -8  -2  10   46.70    7.80
  -8  -2  10   33.80    6.50
  -8  -2  10   49.30    7.70
  -8   2  10   51.49    7.40
  -8   2  10   43.50    7.10
  -8   2  10   45.30    7.20
  -7  -2  10   10.70    4.20
  -7  -2  10   12.40    4.50
  -7  -2  10   12.00    4.20
  -7   2  10   11.50    4.00
  -7   2  10    1.30    3.70
  -7   2  10   14.80    4.50
  -6  -2  10   16.50    4.30
  -6  -2  10   21.30    4.70
  -6  -2  10   10.20    3.50
  -6   2  10    8.90    3.80
  -6   2  10   13.90    3.50
  -6   2  10   11.70    3.70
  -5  -2  10   22.30    4.60
  -5  -2  10   24.80    4.50
  -5  -2  10   19.10    3.70
  -5  -2  10   24.70    4.30
  -5   2  10   17.50    4.10
  -5   2  10   20.70    3.50
  -5   2  10   22.90    3.50
  -5   2  10   25.70    3.50
  -4  -2  10  263.47   10.00
  -4  -2  10  282.57   10.30
  -4  -2  10  258.67    8.30
  -4   2  10  280.67    9.80
  -4   2  10  270.07   10.70
  -4   2  10  267.97    8.60
  -4   2  10  273.17    7.90
  -3  -2  10   77.19    5.20
  -3  -2  10   66.79    4.90
  -3   2  10   71.09    3.50
  -3   2  10   67.09    3.90
  -3   2  10   73.89    4.90
  -3   2  10   61.49    5.00
  -2  -2  10   35.70    3.60
   2  -2 -10   29.60    2.50
  -2  -2  10   43.20    4.00
   2   2 -10   24.30    3.10
  -2   2  10   29.10    3.50
  -2   2  10   28.30    1.90
   2   2 -10   29.00    2.80
  -2   2  10   30.80    2.20
   1  -2 -10  165.38    6.60
   1  -2 -10  162.48    3.00
  -1  -2  10  161.68    5.90
   1  -2 -10  167.08    3.80
  -1  -2  10  151.58    6.00
  -1   2  10  166.08    3.20
   1   2 -10  171.18    5.80
  -1   2  10  171.48    6.60
   1   2 -10  180.58    6.40
   0  -2 -10   89.79    2.20
   0  -2 -10   89.99    2.20
   0  -2 -10   84.99    3.10
   0  -2  10   88.09    4.40
   0  -2 -10   91.09    4.70
   0  -2  10   94.89    4.30
   0   2  10   93.29    2.90
   0   2  10   90.39    4.70
   0   2 -10   96.99    4.70
   0   2 -10   98.79    4.60
  -1  -2 -10  172.38    5.10
  -1  -2 -10  166.48    4.60
   1  -2  10  164.98    5.90
   1  -2  10  171.88    6.50
  -1  -2 -10  175.28    6.50
  -1   2 -10  175.18    6.40
   1   2  10  167.58    5.00
  -1   2 -10  173.98    6.60
   1   2  10  166.48    6.00
  -2  -2 -10   31.30    3.50
  -2  -2 -10   28.30    2.90
  -2  -2 -10   28.80    3.10
   2  -2  10   29.50    3.40
   2  -2  10   35.00    3.70
  -2   2 -10   35.20    3.70
  -2   2 -10   30.10    3.90
   2   2  10   28.20    3.10
   2   2  10   33.30    3.10
  -3  -2 -10   74.29    4.80
  -3  -2 -10   71.09    4.90
   3  -2  10   71.69    5.20
  -3  -2 -10   66.69    4.70
   3  -2  10   80.89    5.40
   3   2  10   56.29    4.50
  -3   2 -10   70.69    5.60
  -3   2 -10   74.29    5.10
   4  -2  10  291.77   10.50
  -4  -2 -10  263.87   10.20
  -4  -2 -10  272.27    9.80
   4  -2  10  264.17   10.00
  -4  -2 -10  276.07    9.30
  -4   2 -10  275.77   10.80
   4   2  10  267.47    9.80
  -4   2 -10  266.07   10.10
  -5  -2 -10   22.30    4.30
   5  -2  10    9.30    3.10
   5  -2  10   23.30    4.40
  -5  -2 -10   25.50    3.90
  -5  -2 -10   16.50    3.60
  -5   2 -10   19.30    3.80
  -5   2 -10   19.90    4.10
   5   2  10   24.90    4.40
   6  -2  10   17.70    4.10
  -6  -2 -10   14.90    4.00
  -6  -2 -10   10.80    3.70
  -6  -2 -10   15.60    4.40
  -6   2 -10   24.00    4.90
  -6   2 -10   18.80    4.70
   6   2  10   17.50    4.40
   7  -2  10   15.50    4.50
  -7  -2 -10   16.30    4.70
  -7  -2 -10   11.90    4.60
  -7   2 -10   13.50    4.90
   7   2  10   10.40    4.80
  -7   2 -10   11.00    4.30
   8  -2  10   48.00    7.80
  -8  -2 -10   53.69    8.40
  -8   2 -10   60.99    8.10
   9  -2  10   20.10    6.60
  -9  -2 -10   22.30    7.10
  -9   2 -10   21.20    6.80
  -9  -3  10    6.30    5.40
  -9  -3  10    5.40    5.10
  -9   3  10    8.20    5.00
  -9   3  10    7.90    5.50
  -8  -3  10    9.20    4.40
  -8  -3  10   14.90    5.40
  -8   3  10    3.50    4.90
  -7  -3  10   87.89    9.20
  -7  -3  10  106.29    8.80
  -7  -3  10   90.19    9.60
  -7   3  10   98.99   10.00
  -6  -3  10  269.27   12.60
  -6  -3  10  276.37   12.70
  -6  -3  10  275.57   13.10
  -6   3  10  290.07   11.60
  -6   3  10  266.37   13.20
  -6   3  10  285.77   11.60
  -5  -3  10   13.40    3.50
  -5  -3  10   23.70    4.50
  -5   3  10   13.50    3.40
  -5   3  10   18.30    3.60
  -5   3  10   20.70    4.50
   4  -3 -10   31.70    3.90
  -4  -3  10   28.20    4.40
  -4  -3  10   37.40    4.80
  -4   3  10   32.30    4.50
  -4   3  10   25.60    3.30
  -4   3  10   22.50    4.20
  -3  -3  10  187.28    8.40
   3  -3 -10  179.18    6.70
  -3  -3  10  171.38    8.00
  -3   3  10  190.78    8.80
  -3   3  10  180.68    8.00
  -3   3  10  168.78    6.10
  -2  -3  10 1397.56   24.20
  -2  -3  10 1352.46   23.90
   2  -3 -10 1325.77   19.80
  -2   3  10 1358.76   19.20
   2   3 -10 1323.57   19.70
   2   3 -10 1369.26   23.70
  -2   3  10 1330.07   23.80
  -1  -3  10  467.45   11.90
  -1  -3  10  497.55   12.40
   1  -3 -10  493.75    8.40
   1  -3 -10  497.85    9.30
  -1   3  10  481.65   12.50
   1   3 -10  505.95   10.50
  -1   3  10  497.65    8.60
   1   3 -10  508.25   12.60
   0  -3 -10   -1.90    1.10
   0  -3  10   -3.70    1.40
   0  -3 -10    0.50    1.20
   0  -3 -10    0.10    1.00
   0  -3  10    1.80    1.60
   0   3 -10   -0.90    1.50
   0   3 -10    1.50    1.70
   0   3  10    0.00    0.90
   0   3  10    1.00    1.70
   1  -3  10  484.35   12.00
   1  -3  10  491.45   12.00
  -1  -3 -10  484.45   11.50
  -1  -3 -10  488.05   10.40
   1   3  10  493.55   12.00
   1   3  10  489.45    9.40
  -1   3 -10  513.95   12.10
  -1   3 -10  512.25   12.50
   2  -3  10 1378.46   23.90
  -2  -3 -10 1353.96   22.40
   2  -3  10 1390.46   23.90
  -2  -3 -10 1394.46   21.50
  -2  -3 -10 1374.16   22.30
   2   3  10 1350.36   20.90
   2   3  10 1351.66   21.90
  -2   3 -10 1331.67   23.80
  -2   3 -10 1338.07   23.60
  -3  -3 -10  163.38    6.70
   3  -3  10  174.28    7.90
  -3  -3 -10  176.78    7.10
  -3  -3 -10  179.58    7.80
   3  -3  10  170.68    7.80
  -3   3 -10  176.38    8.50
   3   3  10  177.08    7.30
  -3   3 -10  168.48    8.00
  -4  -3 -10   29.80    3.80
  -4  -3 -10   27.80    4.40
   4  -3  10   29.00    4.20
  -4  -3 -10   29.10    4.20
   4  -3  10   36.00    4.70
   4   3  10   24.50    3.70
  -4   3 -10   33.80    4.80
  -4   3 -10   29.30    4.30
  -5  -3 -10   17.80    3.80
  -5  -3 -10   20.40    3.70
   5  -3  10    9.30    3.60
  -5  -3 -10   10.10    3.60
   5  -3  10   21.80    4.20
  -5   3 -10   17.10    4.50
  -5   3 -10   16.00    3.70
  -6  -3 -10  279.77   13.10
   6  -3  10  268.47   12.50
   6  -3  10  262.87   12.20
  -6  -3 -10  318.57   13.20
  -6   3 -10  276.07   12.80
  -6   3 -10  298.97   13.40
  -7  -3 -10  103.49    9.50
   7  -3  10   83.29    9.00
  -7  -3 -10   90.19    9.30
   7  -3  10   95.19    8.90
  -7   3 -10  104.29   10.10
  -7   3 -10  101.09    9.50
  -8  -3 -10    3.30    4.70
   8  -3  10    6.50    5.10
  -8   3 -10   12.30    5.30
   9  -3  10   12.60    6.40
  -9  -3 -10    4.80    5.60
  -9   3 -10   12.70    6.20
  -9  -4  10    1.70    5.70
  -9  -4  10    2.00    5.10
  -9   4  10    4.30    5.70
  -8  -4  10   15.10    5.80
  -8  -4  10    3.30    4.80
  -8   4  10   10.30    5.40
  -7  -4  10    9.10    4.30
  -7  -4  10   10.50    5.00
  -7  -4  10    9.00    4.90
  -7   4  10   10.70    5.20
  -6  -4  10   79.69    8.50
  -6  -4  10   90.09    9.30
  -6   4  10   91.99    9.10
  -6   4  10   94.49    8.40
  -5  -4  10   28.10    5.00
  -5  -4  10   33.60    5.70
   5  -4 -10   28.90    4.70
  -5   4  10   28.20    4.40
  -5   4  10   35.80    5.30
  -5   4  10   31.20    5.70
  -4  -4  10   22.70    4.00
   4  -4 -10   29.10    4.10
  -4  -4  10   30.60    5.00
  -4   4  10   29.50    5.10
  -4   4  10   38.80    5.00
  -4   4  10   30.30    3.80
   3  -4 -10   23.50    3.30
  -3  -4  10   26.60    4.30
  -3  -4  10   27.20    4.40
  -3   4  10   24.40    3.90
  -3   4  10   17.70    3.90
   3   4 -10   15.30    3.60
  -3   4  10   20.20    3.00
   2  -4 -10  174.68    6.50
  -2  -4  10  206.58    8.80
  -2  -4  10  201.88    8.80
   2   4 -10  186.98    8.60
  -2   4  10  190.58    8.60
  -2   4  10  205.18    8.80
  -2   4  10  197.08    6.40
   2   4 -10  189.88    5.90
  -1  -4  10   66.79    5.50
   1  -4 -10   72.69    4.10
  -1  -4  10   69.89    5.30
  -1   4  10   75.39    5.60
   1   4 -10   73.29    5.70
  -1   4  10   77.29    3.80
   1   4 -10   76.29    4.30
   0  -4 -10   18.00    1.60
   0  -4 -10   18.20    2.90
   0  -4 -10   13.30    2.30
   0  -4  10   11.80    2.70
   0  -4  10   21.10    3.50
   0   4 -10   18.40    2.90
   0   4  10   15.20    3.10
   0   4  10   16.60    2.10
   0   4 -10   19.40    3.50
  -1  -4 -10   74.89    4.90
  -1  -4 -10   76.79    3.90
   1  -4  10   78.49    5.20
   1  -4  10   79.19    5.60
  -1  -4 -10   73.89    4.70
   1   4  10   70.29    5.20
  -1   4 -10   78.59    5.50
  -1   4 -10   78.09    5.60
  -2  -4 -10  191.28    7.20
   2  -4  10  204.18    8.70
   2  -4  10  200.78    8.40
  -2  -4 -10  208.48    8.10
  -2   4 -10  211.98    8.70
  -2   4 -10  191.48    8.60
  -3  -4 -10   26.20    3.30
   3  -4  10    9.80    3.20
  -3  -4 -10   18.30    3.60
   3  -4  10   18.10    3.60
  -3  -4 -10   20.50    3.40
  -3   4 -10   19.40    3.60
  -3   4 -10   19.00    3.90
   4  -4  10   32.30    4.60
   4  -4  10   33.00    5.10
  -4  -4 -10   26.30    4.00
  -4  -4 -10   33.80    4.80
  -4   4 -10   26.80    4.50
  -4   4 -10   34.00    5.20
   5  -4  10   18.70    4.50
  -5  -4 -10   32.90    5.00
   5  -4  10   35.00    5.10
  -5  -4 -10   33.60    5.80
  -5   4 -10   26.10    5.10
  -5   4 -10   21.10    4.80
  -6  -4 -10   97.59    9.50
  -6  -4 -10   85.29    8.20
   6  -4  10  106.49    8.40
   6  -4  10   88.79    9.00
  -6   4 -10   99.89    9.40
  -6   4 -10   98.69    9.50
   7  -4  10   12.20    4.80
  -7  -4 -10   11.00    4.40
  -7  -4 -10    8.00    4.80
   7  -4  10   23.40    5.50
  -7   4 -10   -1.80    4.50
   8  -4  10   12.60    5.50
   8  -4  10    8.20    5.10
  -8  -4 -10    3.80    5.40
  -8   4 -10    9.40    6.00
   9  -4  10   -0.30    5.40
  -9  -4 -10    2.70    5.80
  -9   4 -10    5.30    5.90
  -9  -5  10   -3.00    5.20
  -9  -5  10    4.20    4.90
  -9   5  10    0.00    5.90
  -8  -5  10   25.30    7.20
  -8  -5  10   21.40    5.80
  -8   5  10   21.60    6.90
  -7  -5  10   53.19    8.20
  -7  -5  10   59.99    8.90
  -7   5  10   50.89    8.10
  -6  -5  10    1.00    3.70
  -6  -5  10    1.10    3.60
   6  -5 -10   -2.10    3.20
  -6   5  10    4.70    3.60
  -6   5  10   -1.10    3.70
  -5  -5  10   32.50    5.70
  -5  -5  10   26.40    5.70
   5  -5 -10   35.80    5.70
  -5   5  10   44.50    5.90
  -5   5  10   42.10    6.20
   4  -5 -10  144.59    7.90
  -4  -5  10  143.69    9.40
  -4  -5  10  142.49    8.90
  -4   5  10  144.89    9.40
  -4   5  10  137.19    8.40
  -3  -5  10  207.78    9.80
   3  -5 -10  216.18    8.70
  -3  -5  10  215.08   10.70
  -3   5  10  197.88   10.30
   3   5 -10  235.28   10.80
  -3   5  10  222.98    8.40
  -3   5  10  228.68   10.30
  -2  -5  10   16.50    3.60
   2  -5 -10    9.80    2.50
  -2  -5  10    5.30    2.90
  -2   5  10   14.10    3.40
  -2   5  10   15.10    3.60
   2   5 -10   12.10    3.30
  -2   5  10   13.20    2.50
  -1  -5  10   35.30    4.50
   1  -5 -10   38.00    3.90
  -1  -5  10   35.90    4.70
   1   5 -10   44.70    3.70
  -1   5  10   52.79    5.80
   1   5 -10   40.40    5.10
  -1   5  10   38.20    3.60
   0  -5  10    8.20    2.60
   0  -5 -10    9.00    2.30
   0  -5  10    7.60    2.60
   0   5 -10   10.80    3.00
   0   5  10    3.90    2.60
   0   5  10   12.00    2.40
   0   5 -10    4.70    2.20
  -1  -5 -10   40.60    4.50
  -1  -5 -10   39.60    3.50
   1  -5  10   42.70    5.10
   1  -5  10   33.90    4.40
  -1  -5 -10   34.60    3.90
   1   5  10   37.80    3.90
  -1   5 -10   39.80    4.90
  -1   5 -10   38.80    4.30
   2  -5  10   10.70    3.00
  -2  -5 -10    9.50    2.40
  -2  -5 -10   11.20    2.50
   2  -5  10   11.30    3.30
  -2  -5 -10   12.30    3.20
  -2   5 -10   10.30    3.40
  -2   5 -10   12.20    3.00
   3  -5  10  205.78   10.00
   3  -5  10  228.28    9.80
  -3  -5 -10  227.58   10.20
  -3  -5 -10  214.48    8.60
  -3   5 -10  236.78   11.00
  -3   5 -10  226.28   10.50
   4  -5  10  135.69    8.40
  -4  -5 -10  145.39    9.10
   4  -5  10  135.09    8.90
  -4  -5 -10  145.99    8.30
  -4  -5 -10  132.99    7.70
  -4   5 -10  161.78    9.90
  -4   5 -10  141.79    9.20
   5  -5  10   52.19    6.80
  -5  -5 -10   61.89    6.60
   5  -5  10   53.99    6.60
  -5  -5 -10   44.00    6.50
  -5   5 -10   47.60    7.00
  -5   5 -10   35.80    6.00
  -6  -5 -10    0.90    3.80
   6  -5  10    1.70    3.70
   6  -5  10    2.50    4.00
  -6  -5 -10    2.90    3.50
  -6   5 -10    4.00    3.50
  -6   5 -10    5.40    4.50
  -7  -5 -10   49.00    7.90
   7  -5  10   48.30    7.40
  -7  -5 -10   39.80    6.80
   7  -5  10   50.39    8.00
  -7   5 -10   40.00    8.00
   8  -5  10   29.80    7.30
   8  -5  10   12.50    5.50
  -8  -5 -10   23.60    6.70
  -8  -5 -10   28.60    7.50
  -8   5 -10   25.30    7.30
  -9  -5 -10    0.60    5.80
  -9  -5 -10    5.10    5.60
   9  -5  10    1.20    5.70
  -9   5 -10    2.40    6.00
  -8  -6  10   37.40    8.50
  -8  -6  10   33.50    7.50
  -8   6  10   26.30    8.00
  -7  -6  10   -2.90    4.30
  -7  -6  10    5.20    5.30
  -7   6  10    8.40    5.60
   6  -6 -10   -3.40    4.80
  -6  -6  10    3.30    3.80
  -6  -6  10    3.20    3.60
  -6   6  10    5.50    3.90
  -6   6  10    5.40    4.50
  -5  -6  10    8.30    4.50
  -5  -6  10   11.00    4.00
   5  -6 -10    8.90    4.30
  -5   6  10   17.30    5.30
  -5   6  10   12.40    4.30
  -4  -6  10   66.59    8.10
  -4  -6  10   54.79    7.00
   4  -6 -10   57.89    6.10
  -4   6  10   52.39    6.60
  -4   6  10   56.69    7.30
   3  -6 -10   -1.00    2.60
  -3  -6  10    7.00    3.60
  -3  -6  10    2.80    2.70
  -3   6  10    0.20    3.00
   3   6 -10    0.80    3.10
  -3   6  10    2.20    2.90
  -2  -6  10    3.40    3.00
   2  -6 -10    3.10    2.60
  -2  -6  10    2.80    2.80
  -2   6  10    4.90    2.80
   2   6 -10    6.20    2.60
  -2   6  10   -2.50    2.60
   1  -6 -10   85.39    5.90
  -1  -6  10   97.89    6.90
  -1  -6  10   87.29    7.10
  -1   6  10   94.69    6.00
  -1   6  10  101.49    7.10
   1   6 -10  104.89    7.90
   0  -6 -10  175.88    7.90
   0  -6  10  178.48    8.70
   0  -6  10  176.88    9.20
   0   6 -10  192.48    7.60
   0   6 -10  182.38    9.60
   0   6  10  186.08    8.00
   1  -6  10   82.09    6.40
   1  -6  10   80.49    6.50
  -1  -6 -10   89.69    6.30
   1   6  10   97.19    6.00
  -1   6 -10  103.79    7.80
  -1   6 -10   89.19    6.20
  -2  -6 -10    4.10    2.90
   2  -6  10    4.20    3.00
   2  -6  10    3.40    2.90
  -2   6 -10   -2.00    2.40
  -2   6 -10    4.00    2.70
  -3  -6 -10    5.00    3.20
   3  -6  10    4.10    3.00
   3  -6  10    3.50    2.50
  -3  -6 -10    2.10    2.20
  -3   6 -10   -0.20    3.30
  -3   6 -10    4.60    3.30
   4  -6  10   42.40    6.00
  -4  -6 -10   65.29    7.40
  -4  -6 -10   52.49    6.20
   4  -6  10   37.00    6.30
  -4   6 -10   58.79    7.30
  -4   6 -10   53.99    7.00
  -5  -6 -10    6.40    4.10
  -5  -6 -10   14.20    4.20
   5  -6  10    9.70    4.10
   5  -6  10    4.60    4.00
  -5  -6 -10    7.40    4.40
  -5   6 -10    9.10    4.90
  -5   6 -10    7.20    3.80
  -6  -6 -10   12.20    5.20
  -6  -6 -10   -0.20    3.50
  -6  -6 -10   -4.60    3.30
   6  -6  10    2.40    4.10
   6  -6  10    8.80    4.60
  -6   6 -10    0.80    4.70
   7  -6  10    6.00    5.10
  -7  -6 -10    4.70    5.90
  -7  -6 -10   -0.60    4.00
   7  -6  10    2.80    4.80
  -7   6 -10    3.30    5.00
  -8  -6 -10   31.00    7.20
   8  -6  10   28.20    7.20
   8  -6  10   29.90    6.90
  -8  -6 -10   37.80    8.60
  -8   6 -10   18.80    7.10
  -7  -7  10  141.49   14.00
  -7  -7  10  130.29   12.90
  -7   7  10  134.69   13.10
  -6  -7  10   38.40    7.20
  -6  -7  10   38.40    7.50
  -6   7  10   38.80    7.80
  -5  -7  10   27.40    6.40
  -5  -7  10   24.70    5.80
  -5   7  10   26.20    6.40
  -4  -7  10   25.70    6.30
   4  -7 -10   23.10    4.80
  -4  -7  10   14.60    4.50
  -4   7  10   22.60    5.20
   4   7 -10   25.60    6.00
  -3  -7  10  124.69   10.40
   3  -7 -10  153.28    9.20
  -3  -7  10  151.58    9.90
  -3   7  10  141.49   10.00
   3   7 -10  138.59   10.50
  -2  -7  10  135.19    9.60
  -2  -7  10  125.39    8.60
   2  -7 -10  150.28    8.40
   2   7 -10  132.19    9.50
  -2   7  10  145.49    9.40
  -1  -7  10   86.39    8.40
   1  -7 -10   80.99    6.60
  -1  -7  10   84.69    6.80
  -1   7  10   83.69    7.70
   1   7 -10   74.49    7.70
   0  -7 -10    0.90    2.40
   0  -7  10   -2.00    2.00
   0  -7  10    2.70    2.50
   0   7 -10    5.50    3.00
   0   7  10   -2.90    2.50
  -1  -7 -10   70.29    6.90
   1  -7  10   82.99    8.00
   1  -7  10   80.39    7.40
   1   7  10   84.99    8.30
  -1   7 -10   82.09    6.70
  -1   7 -10   65.29    7.60
   2  -7  10  160.38   10.10
  -2  -7 -10  148.39    9.50
   2  -7  10  138.99    8.60
  -2   7 -10  172.08   10.70
  -2   7 -10  143.59    8.80
   3  -7  10  174.38    9.80
   3  -7  10  129.79    9.80
  -3  -7 -10  139.59   10.00
  -3   7 -10  121.49    9.70
  -3   7 -10  141.19    9.90
   4  -7  10   30.30    5.50
  -4  -7 -10   17.50    5.20
   4  -7  10   22.60    5.10
  -4   7 -10   30.30    6.00
  -4   7 -10   15.10    4.60
   5  -7  10   24.80    5.90
  -5  -7 -10   29.50    6.80
   5  -7  10   28.50    5.60
  -5  -7 -10   29.30    5.90
  -5   7 -10   34.70    6.60
  -6  -7 -10   41.60    6.80
  -6  -7 -10   32.40    7.90
   6  -7  10   39.90    6.80
   6  -7  10   28.30    6.80
  -6   7 -10   28.60    7.20
   7  -7  10  133.19   11.70
   7  -7  10  142.09   13.30
  -7  -7 -10  152.28   14.30
  -7  -7 -10  109.99   11.10
  -7   7 -10  146.39   13.30
  -7  -8  10    2.30    5.90
  -7  -8  10    4.10    5.30
  -7   8  10   10.70    6.70
  -6  -8  10    3.60    5.40
  -6  -8  10   -0.60    4.30
  -6   8  10    4.80    5.90
  -5  -8  10   11.60    5.40
  -5  -8  10   11.40    4.90
  -5   8  10   20.40    6.30
  -4  -8  10  116.09   10.60
  -4  -8  10  115.09   11.40
  -4   8  10  123.99   11.50
  -3  -8  10   24.60    6.00
  -3  -8  10   27.50    5.90
  -3   8  10   34.30    6.50
   3   8 -10   31.50    6.50
  -2  -8  10    0.10    3.30
  -2  -8  10    0.40    3.70
   2  -8 -10    7.70    4.10
   2   8 -10    4.40    3.70
  -2   8  10    4.00    3.90
   1  -8 -10   92.79    7.70
  -1  -8  10   86.39    8.10
  -1  -8  10   97.09    9.40
  -1   8  10   96.89    8.70
   1   8 -10  101.99    9.60
   0  -8 -10   75.79    7.30
   0  -8  10   74.49    7.50
   0  -8  10   82.09    8.50
   0   8 -10   86.69    9.10
   1  -8  10  113.39    8.00
   1  -8  10  100.29    9.60
  -1  -8 -10   88.49    8.10
  -1   8 -10   96.09    9.40
   2  -8  10    1.90    3.20
   2  -8  10    4.80    4.00
  -2  -8 -10    0.40    3.60
  -2   8 -10    6.80    4.10
  -3  -8 -10   44.50    7.10
   3  -8  10   25.50    5.80
   3  -8  10   28.60    5.60
  -3   8 -10   27.10    6.30
  -3   8 -10   23.60    5.70
   4  -8  10   97.59   10.20
  -4  -8 -10  111.69   10.80
   4  -8  10  112.49    9.80
  -4   8 -10  126.39   10.70
   5  -8  10   12.90    4.80
   5  -8  10    4.60    4.70
  -5  -8 -10   20.20    6.20
  -5   8 -10    7.20    5.50
   6  -8  10    7.30    6.40
  -6  -8 -10    4.00    5.20
   6  -8  10    3.30    5.10
  -6   8 -10   -1.20    5.30
   7  -8  10    3.30    5.40
  -7  -8 -10    0.40    6.00
  -7   8 -10    3.60    6.70
  -6  -9  10    9.60    5.50
  -6  -9  10    5.60    6.10
  -6   9  10   -1.10    5.90
  -5  -9  10    5.70    5.60
  -5  -9  10    1.00    4.30
  -5   9  10   14.30    6.70
  -4  -9  10    6.80    4.70
  -4  -9  10    5.40    4.60
  -4   9  10    0.00    5.70
  -3  -9  10    6.80    4.70
  -3  -9  10    3.60    4.30
  -3   9  10    9.30    5.20
  -2  -9  10   25.30    5.90
  -2  -9  10   45.40    6.90
  -2   9  10   42.70    8.70
  -1  -9  10   20.80    5.80
  -1  -9  10   28.20    5.70
   0  -9  10    5.70    4.20
   0  -9 -10    6.80    4.00
   0  -9  10    5.00    3.80
   1  -9  10   22.10    5.50
  -1  -9 -10   34.10    6.30
   1  -9  10   28.80    5.60
  -2  -9 -10   40.90    6.90
   2  -9  10   32.80    6.90
   2  -9  10   36.80    6.40
   3  -9  10    6.30    4.50
  -3  -9 -10    3.00    5.00
   3  -9  10    3.30    3.80
  -4  -9 -10    0.80    4.80
   4  -9  10   -3.30    4.70
   4  -9  10    8.90    4.90
  -4   9 -10   13.30    6.10
   5  -9  10    1.90    5.00
  -5  -9 -10    3.40    5.60
  -5   9 -10   -1.80    5.70
   6  -9  10    3.90    5.50
  -6  -9 -10    7.90    6.70
  -6   9 -10    9.20    6.90
  -4 -10  10   17.90    6.90
  -4 -10  10   21.90    6.60
  -4  10  10   16.50    7.00
  -3 -10  10   -1.60    4.80
  -3 -10  10    1.10    4.60
  -2 -10  10   89.29   10.50
  -2 -10  10   77.49    9.30
  -1 -10  10    9.40    4.50
  -1 -10  10   21.90    5.60
   0 -10  10   30.80    6.70
   0 -10  10   32.60    6.20
   1 -10  10   12.40    5.90
   1 -10  10   26.70    6.10
  -2 -10 -10   94.69   12.40
   2 -10  10  100.29   11.00
   3 -10  10    1.00    4.70
  -3 -10 -10   10.90    5.50
   4 -10  10   24.10    7.10
  -4 -10 -10   24.10    7.70
  -2 -11  10   -1.80    4.90
  -2 -11  10   -0.50    5.00
  -1 -11  10    4.70    5.70
  -1 -11  10   12.10    5.40
   0 -11  10   -5.70    4.80
   1 -11  10    8.30    5.80
   2 -11  10    1.70    5.00
  -9   0  11    1.30    4.60
  -8   0  11    8.20    4.90
  -8   0  11   13.50    4.90
  -8   0  11   22.70    6.00
  -7   0  11    4.10    3.70
  -7   0  11    8.50    4.00
  -7   0  11    8.90    3.80
  -7   0  11   10.50    3.90
  -6   0  11    2.40    3.10
  -6   0  11    3.50    2.50
  -6   0  11    6.10    3.00
  -6   0  11    6.40    3.00
  -6   0  11    5.80    3.10
  -5   0  11    1.10    2.00
  -5   0  11    5.20    2.80
  -5   0  11    0.20    2.20
  -5   0  11   -1.30    1.90
  -5   0  11    5.10    2.20
  -4   0  11    6.40    2.40
  -4   0  11    8.80    2.30
  -4   0  11    9.50    2.50
  -4   0  11    7.60    2.60
  -4   0  11    6.00    2.00
  -3   0  11   33.90    3.40
  -3   0  11   36.40    4.00
  -3   0  11   38.90    3.80
  -3   0  11   32.40    3.20
  -2   0  11    0.90    1.70
   2   0 -11   -0.70    1.70
  -2   0  11    1.40    1.20
  -2   0  11   -0.10    1.80
  -1   0  11   62.59    3.90
   1   0 -11   65.09    4.00
  -1   0  11   59.89    2.60
  -1   0  11   52.49    3.20
   1   0 -11   60.99    2.70
   0   0 -11    1.30    0.70
   0   0  11    0.50    0.70
   0   0  11    0.60    1.20
   0   0 -11    1.80    1.30
   0   0  11   -2.20    0.90
   1   0  11   66.89    3.40
   1   0  11   58.69    3.50
  -1   0 -11   64.29    3.20
   1   0  11   66.89    2.90
  -1   0 -11   59.39    4.00
  -2   0 -11    2.10    1.50
  -2   0 -11    2.00    2.20
   2   0  11    2.30    1.60
   2   0  11    3.00    1.40
   2   0  11    2.50    1.90
   3   0  11   37.10    4.10
   3   0  11   33.40    2.40
  -3   0 -11   32.20    3.90
  -3   0 -11   39.40    3.90
  -4   0 -11    5.60    2.30
  -4   0 -11   13.60    3.30
   4   0  11    9.90    2.90
  -5   0 -11    4.30    2.90
   5   0  11    2.10    2.40
  -5   0 -11    1.90    2.20
   6   0  11    2.70    2.80
  -6   0 -11    7.50    3.70
  -6   0 -11    5.80    3.30
  -7   0 -11    3.80    3.70
   7   0  11   10.20    4.20
  -7   0 -11    8.30    4.40
  -7   0 -11    7.50    4.20
  -8   0 -11   20.80    5.80
   8   0  11   22.30    5.70
  -8   0 -11   21.70    6.10
  -9   0 -11    0.60    5.30
   9   0  11    2.30    4.60
  -9  -1  11    7.50    5.20
  -9  -1  11    4.20    5.00
  -9   1  11    0.10    4.40
  -8  -1  11    6.10    4.20
  -8  -1  11    3.30    4.30
  -8  -1  11    5.70    4.10
  -8   1  11    1.90    4.20
  -8   1  11    4.80    3.80
  -8   1  11    4.20    4.40
  -7  -1  11    5.00    3.90
  -7  -1  11    5.80    3.70
  -7  -1  11   10.60    4.20
  -7   1  11    1.40    3.50
  -7   1  11    6.70    4.10
  -7   1  11    7.00    3.80
  -7   1  11    7.00    3.70
  -6  -1  11   69.49    7.10
  -6  -1  11   62.59    6.80
  -6  -1  11   60.99    6.70
  -6  -1  11   69.39    6.50
  -6  -1  11   69.49    6.50
  -6   1  11   70.29    6.60
  -6   1  11   61.49    6.70
  -6   1  11   78.69    6.40
  -6   1  11   66.19    7.10
  -6   1  11   80.49    6.40
  -5  -1  11    1.00    2.10
  -5  -1  11    3.00    2.10
  -5  -1  11    0.40    2.20
  -5  -1  11    3.70    2.60
  -5  -1  11    2.10    2.30
  -5   1  11    2.30    2.30
  -5   1  11    2.60    2.60
  -5   1  11    3.70    2.10
  -5   1  11    2.90    2.10
  -5   1  11    0.40    1.80
  -4  -1  11   20.70    3.30
  -4  -1  11   20.10    3.20
  -4  -1  11   16.60    3.30
  -4  -1  11   17.80    3.20
  -4  -1  11   18.40    3.10
  -4   1  11   16.10    3.10
  -4   1  11   13.20    3.10
  -4   1  11   10.20    2.30
  -4   1  11   22.30    3.20
  -4   1  11   19.50    3.00
  -3  -1  11   17.20    2.90
  -3  -1  11   19.70    3.10
  -3   1  11   18.70    2.50
  -3   1  11   28.80    2.90
  -3   1  11   17.20    2.50
  -3   1  11   20.00    3.20
  -2  -1  11  690.63   13.00
  -2  -1  11  703.83   14.10
   2  -1 -11  699.63   14.80
  -2   1  11  675.63   11.00
   2   1 -11  697.73   13.60
  -2   1  11  681.43   10.70
  -2   1  11  683.33   11.60
  -2   1  11  692.93   14.60
   1  -1 -11   18.00    2.60
  -1  -1  11   24.60    2.40
  -1  -1  11   22.40    2.60
   1   1 -11   21.10    2.70
   1   1 -11   23.30    2.40
  -1   1  11   27.20    3.10
  -1   1  11   21.50    1.90
   0  -1  11    1.50    1.00
   0  -1 -11   -1.80    1.20
   0  -1  11   -0.10    1.10
   0   1 -11    1.10    1.00
   0   1  11    1.00    0.90
   0   1  11    1.20    1.20
   0   1 -11    0.30    1.20
  -1  -1 -11   22.30    2.80
   1  -1  11   25.60    2.80
   1  -1  11   24.40    2.50
  -1  -1 -11   23.20    1.90
  -1  -1 -11   23.90    2.00
  -1   1 -11   27.20    3.20
  -1   1 -11   26.10    2.60
   1   1  11   26.90    2.70
   1   1  11   28.30    2.70
   2  -1  11  721.83   13.80
  -2  -1 -11  687.13   14.60
  -2  -1 -11  702.83   13.00
  -2  -1 -11  689.23   12.80
   2  -1  11  697.53   14.50
   2   1  11  655.23   11.90
  -2   1 -11  701.33   15.00
  -2   1 -11  681.53   13.80
   2   1  11  686.13   13.40
   3  -1  11   23.90    3.40
  -3  -1 -11   21.20    3.20
  -3  -1 -11   16.50    3.20
   3  -1  11   21.00    3.20
  -3  -1 -11   23.40    3.10
   3   1  11   20.20    3.10
  -3   1 -11   19.00    3.50
   3   1  11   19.40    2.10
  -3   1 -11   25.80    3.40
   4  -1  11   14.00    3.10
  -4  -1 -11   13.80    2.90
   4  -1  11   23.40    3.70
  -4  -1 -11   15.90    3.10
  -4  -1 -11   15.10    3.10
  -4   1 -11   13.10    3.60
   4   1  11   18.00    3.30
  -4   1 -11   18.50    3.40
   5  -1  11   -1.20    2.20
  -5  -1 -11    0.00    2.40
  -5  -1 -11    4.10    2.30
  -5  -1 -11    4.70    2.80
  -5   1 -11   -0.10    2.80
   5   1  11    1.30    2.40
  -5   1 -11   -1.30    1.80
  -6  -1 -11   64.39    6.70
  -6  -1 -11   72.39    7.70
  -6  -1 -11   68.59    7.10
   6  -1  11   68.99    7.20
   6   1  11   63.79    6.70
  -6   1 -11   68.39    7.30
  -6   1 -11   66.69    6.90
   7  -1  11   13.00    4.30
  -7  -1 -11    9.20    4.90
  -7  -1 -11    6.10    4.00
  -7  -1 -11    8.40    4.50
  -7   1 -11    2.10    3.50
  -7   1 -11   14.50    5.00
   7   1  11   14.20    4.80
   8  -1  11    6.70    4.80
  -8  -1 -11   -0.20    4.30
  -8   1 -11    1.60    4.70
   8   1  11    1.20    3.90
  -9  -1 -11   -2.00    5.10
   9  -1  11    7.10    5.20
  -9   1 -11    0.20    5.10
  -9   1 -11    0.50    5.80
  -9  -2  11    6.90    5.20
  -9  -2  11   -1.50    4.40
  -9   2  11   13.10    5.80
  -9   2  11    5.00    5.20
  -8  -2  11    9.50    4.90
  -8  -2  11    7.50    5.00
  -8  -2  11    4.90    4.40
  -8   2  11   12.80    5.20
  -8   2  11    0.30    3.80
  -7  -2  11   50.19    6.80
  -7  -2  11   47.60    7.10
  -7  -2  11   56.59    7.30
  -7   2  11   69.09    7.60
  -7   2  11   49.70    6.30
  -7   2  11   50.09    7.10
  -6  -2  11  322.57   13.10
  -6  -2  11  313.37   13.30
  -6  -2  11  328.97   12.10
  -6  -2  11  311.67   13.10
  -6   2  11  322.77   12.00
  -6   2  11  326.27   13.90
  -6   2  11  303.87   11.60
  -5  -2  11    0.90    2.20
  -5  -2  11    2.30    2.70
  -5  -2  11    3.20    2.60
  -5   2  11   -1.60    1.80
  -5   2  11    0.00    2.50
  -5   2  11    0.40    1.80
  -4  -2  11  279.57   10.40
  -4  -2  11  262.37   10.10
  -4   2  11  264.57    7.80
  -4   2  11  255.57    9.60
  -4   2  11  249.68    8.30
  -4   2  11  244.28   10.50
  -3  -2  11  237.78    8.90
  -3  -2  11  221.48    8.40
  -3   2  11  211.18    6.50
  -3   2  11  205.88    8.30
  -3   2  11  207.38    5.80
  -2  -2  11   63.99    4.50
  -2  -2  11   76.39    4.60
   2  -2 -11   58.49    3.00
   2  -2 -11   62.89    3.10
   2   2 -11   66.59    4.00
   2   2 -11   69.39    4.50
  -2   2  11   61.29    4.60
  -2   2  11   60.59    2.80
  -2   2  11   65.89    2.70
  -1  -2  11   71.59    4.40
  -1  -2  11   68.09    4.10
   1  -2 -11   67.89    4.60
  -1   2  11   67.39    4.50
   1   2 -11   69.89    4.30
   1   2 -11   65.39    4.00
   0  -2  11  842.52   14.70
   0  -2 -11  868.51   16.40
   0  -2  11  854.01   15.80
   0   2  11  862.01   12.20
   0   2  11  872.71   16.40
   0   2 -11  885.41   15.80
   0   2 -11  866.11   15.90
  -1  -2 -11   59.49    4.30
   1  -2  11   73.39    4.20
   1  -2  11   71.19    4.40
  -1  -2 -11   73.99    3.40
  -1  -2 -11   73.99    3.10
   1   2  11   70.69    4.30
  -1   2 -11   78.49    4.60
   1   2  11   75.09    3.50
  -1   2 -11   63.59    4.50
  -2  -2 -11   61.79    3.80
  -2  -2 -11   73.49    4.20
   2  -2  11   64.69    4.60
   2  -2  11   69.59    4.80
  -2  -2 -11   66.59    4.70
   2   2  11   61.49    3.80
  -2   2 -11   66.79    4.60
   2   2  11   62.59    4.20
  -2   2 -11   68.99    5.20
  -3  -2 -11  226.88    8.30
  -3  -2 -11  218.98    7.70
   3  -2  11  216.08    8.50
  -3  -2 -11  223.78    8.20
   3  -2  11  233.78    8.70
   3   2  11  216.88    8.00
   3   2  11  204.58    6.40
  -3   2 -11  215.28    8.80
  -3   2 -11  226.38    8.70
  -4  -2 -11  272.47    9.70
   4  -2  11  275.97   10.60
   4  -2  11  297.27   10.60
  -4  -2 -11  277.57    9.90
  -4  -2 -11  261.97   10.10
   4   2  11  259.17    9.70
  -4   2 -11  265.67   10.30
  -4   2 -11  260.97   10.50
   5  -2  11    5.00    2.50
  -5  -2 -11    3.50    2.60
  -5  -2 -11    0.80    2.30
   5  -2  11    3.30    2.80
  -5  -2 -11   -3.70    2.30
  -5   2 -11    2.00    2.50
   5   2  11   -0.30    2.30
  -5   2 -11   -2.30    2.60
  -6  -2 -11  349.17   14.20
   6  -2  11  316.17   12.80
  -6  -2 -11  316.77   13.20
  -6  -2 -11  344.47   12.20
   6   2  11  316.87   12.80
  -6   2 -11  310.77   13.50
  -6   2 -11  318.37   13.60
  -7  -2 -11   47.30    6.80
   7  -2  11   53.79    7.10
  -7  -2 -11   66.29    8.40
  -7   2 -11   45.10    7.00
  -7   2 -11   50.09    7.20
   7   2  11   86.59    9.10
   8  -2  11    4.20    4.30
  -8  -2 -11    0.00    4.60
  -8   2 -11    4.30    4.90
   9  -2  11    0.20    5.00
  -9  -2 -11   -1.20    5.40
  -9   2 -11    1.70    5.10
  -9  -3  11    2.20    4.60
  -9  -3  11   -0.30    5.10
  -9   3  11    5.00    5.60
  -8  -3  11    0.60    4.20
  -8  -3  11    0.20    4.20
  -8   3  11   -1.20    3.80
  -8   3  11   -1.40    3.60
  -7  -3  11    5.00    4.10
  -7  -3  11    1.60    3.60
  -7  -3  11   10.30    4.20
  -7   3  11    5.30    4.70
  -6  -3  11   31.40    5.70
  -6  -3  11   18.90    5.20
  -6  -3  11   18.40    4.50
  -6   3  11   22.40    5.30
  -6   3  11   21.40    4.20
  -5  -3  11   12.40    3.60
  -5  -3  11   12.90    3.70
  -5   3  11   17.80    3.80
  -5   3  11   15.90    3.40
  -5   3  11   19.90    4.70
  -4  -3  11   13.90    3.40
   4  -3 -11   14.80    2.80
  -4  -3  11   18.70    3.80
  -4   3  11   11.80    2.60
  -4   3  11   17.50    4.10
  -4   3  11   12.80    3.20
   3  -3 -11   33.50    3.50
  -3  -3  11   33.30    4.40
  -3  -3  11   24.90    4.00
   3   3 -11   32.00    3.10
  -3   3  11   30.10    4.20
  -3   3  11   28.30    4.10
  -3   3  11   27.60    2.90
  -2  -3  11   79.69    5.70
  -2  -3  11   77.59    5.60
   2  -3 -11   80.19    3.90
   2   3 -11   69.59    4.00
  -2   3  11   83.19    5.70
   2   3 -11   67.89    5.20
  -2   3  11   78.29    3.60
  -1  -3  11    6.00    2.40
   1  -3 -11   11.60    1.80
  -1  -3  11   15.80    3.00
   1  -3 -11    9.50    1.30
  -1   3  11   11.20    2.70
  -1   3  11   10.50    1.30
   1   3 -11   13.60    2.50
   1   3 -11   12.60    2.90
   0  -3  11   -1.80    1.40
   0  -3 -11    0.70    0.90
   0  -3 -11   -2.20    1.30
   0  -3 -11    0.90    1.20
   0  -3  11    2.90    1.90
   0   3 -11   -0.40    1.70
   0   3  11   -2.20    1.40
   0   3 -11    0.30    1.50
  -1  -3 -11   11.20    2.10
   1  -3  11    9.60    2.40
  -1  -3 -11   11.70    2.60
   1  -3  11   10.10    2.50
   1   3  11    9.30    2.50
  -1   3 -11    9.80    2.70
  -1   3 -11   17.40    3.10
   1   3  11   10.10    1.90
  -2  -3 -11   74.99    4.90
   2  -3  11   79.29    5.50
   2  -3  11   65.79    5.20
  -2  -3 -11   74.99    4.90
  -2  -3 -11   86.29    4.50
  -2   3 -11   80.09    5.50
   2   3  11   82.49    5.00
  -2   3 -11   67.49    5.50
   2   3  11   86.39    4.80
  -3  -3 -11   35.30    3.90
  -3  -3 -11   29.90    3.90
  -3  -3 -11   29.20    3.70
   3  -3  11   30.20    4.20
   3  -3  11   37.30    4.60
  -3   3 -11   26.90    4.40
   3   3  11   27.40    3.50
  -3   3 -11   33.80    4.40
  -4  -3 -11   11.10    2.80
  -4  -3 -11   11.90    3.50
   4  -3  11   19.00    3.70
  -4  -3 -11   12.10    2.90
   4  -3  11   15.00    3.70
  -4   3 -11   13.80    3.50
  -4   3 -11   14.70    3.80
   4   3  11   13.10    3.30
  -5  -3 -11   10.60    3.10
  -5  -3 -11   13.40    3.90
   5  -3  11   19.70    4.20
  -5  -3 -11   14.90    3.50
   5  -3  11   21.50    4.20
  -5   3 -11   17.70    3.90
  -5   3 -11   15.90    4.40
   5   3  11    8.00    3.40
  -6  -3 -11   20.50    5.00
   6  -3  11   13.00    4.50
   6  -3  11   18.40    4.50
  -6  -3 -11   19.00    4.40
  -6   3 -11   18.30    5.20
  -6   3 -11    9.50    4.00
   7  -3  11    3.30    3.90
  -7  -3 -11    7.00    3.80
   7  -3  11   12.20    4.80
  -7  -3 -11   14.20    5.00
  -7   3 -11    4.40    4.10
  -7   3 -11   10.40    4.60
   8  -3  11    2.30    4.60
  -8  -3 -11   -0.50    4.20
  -8   3 -11   -0.90    4.80
  -9  -3 -11   12.10    6.70
   9  -3  11    4.00    5.90
  -9   3 -11   10.50    6.40
  -9  -4  11    0.10    5.50
  -9  -4  11    6.20    5.50
  -9   4  11    1.10    5.70
  -8  -4  11   34.50    7.60
  -8  -4  11   23.90    6.30
  -8   4  11   26.40    6.70
  -7  -4  11   64.89    8.30
  -7  -4  11   91.99   10.00
  -7  -4  11   72.29    8.70
  -7   4  11   73.79    9.20
  -6  -4  11   18.80    5.20
  -6  -4  11   16.90    5.00
  -6   4  11   12.40    5.00
  -6   4  11   18.50    4.60
  -5  -4  11  224.08   11.50
  -5  -4  11  213.08   11.10
   5  -4 -11  212.38    9.70
  -5   4  11  231.98   10.80
  -5   4  11  210.88   11.50
  -4  -4  11   73.09    7.20
  -4  -4  11   61.49    6.50
   4  -4 -11   68.79    5.30
  -4   4  11   52.49    5.90
  -4   4  11   66.29    6.40
  -4   4  11   64.09    7.10
  -3  -4  11  158.38    8.70
   3  -4 -11  162.38    6.80
  -3  -4  11  158.48    8.40
  -3   4  11  162.98    9.00
  -3   4  11  172.28    6.70
   3   4 -11  175.88    8.90
  -3   4  11  169.68    8.50
   2  -4 -11   68.49    4.20
  -2  -4  11   75.69    5.90
  -2  -4  11   72.19    5.60
  -2   4  11   75.59    4.10
  -2   4  11   81.59    6.00
   2   4 -11   72.79    5.80
   2   4 -11   65.79    3.90
  -1  -4  11   60.19    5.40
  -1  -4  11   58.19    5.30
   1  -4 -11   51.49    3.60
  -1   4  11   50.99    3.30
   1   4 -11   62.29    5.60
  -1   4  11   43.20    4.80
   1   4 -11   63.29    4.20
   0  -4  11   78.89    5.40
   0  -4  11   85.39    5.60
   0  -4 -11   85.99    4.40
   0  -4 -11   85.39    5.30
   0   4 -11  100.29    5.20
   0   4  11   94.09    6.00
   0   4  11   84.59    4.00
   0   4 -11   95.59    6.00
  -1  -4 -11   56.89    4.40
  -1  -4 -11   49.99    4.00
   1  -4  11   53.69    5.00
   1  -4  11   63.59    5.20
   1   4  11   54.19    5.10
  -1   4 -11   57.99    5.10
  -1   4 -11   50.69    5.10
   2  -4  11   82.19    5.80
  -2  -4 -11   74.19    5.00
  -2  -4 -11   74.59    5.30
   2  -4  11   74.49    5.80
  -2   4 -11   67.39    5.70
  -2   4 -11   82.09    6.10
   3  -4  11  161.58    8.60
  -3  -4 -11  176.58    8.40
  -3  -4 -11  163.48    7.00
  -3  -4 -11  165.08    7.30
   3  -4  11  157.88    7.90
  -3   4 -11  165.18    8.60
  -3   4 -11  170.28    8.90
  -4  -4 -11   58.79    5.80
  -4  -4 -11   61.69    6.30
  -4  -4 -11   60.09    5.00
   4  -4  11   61.79    6.30
   4  -4  11   66.19    6.50
  -4   4 -11   59.39    6.50
  -4   4 -11   67.39    7.00
  -5  -4 -11  230.68   10.80
  -5  -4 -11  217.68   11.10
   5  -4  11  196.28   10.20
   5  -4  11  219.28   10.90
  -5   4 -11  216.38   11.40
  -5   4 -11  221.68   11.50
   6  -4  11   28.00    5.10
  -6  -4 -11   20.60    5.20
  -6  -4 -11   12.80    4.00
   6  -4  11   16.20    4.70
  -6   4 -11   16.60    5.40
  -6   4 -11    9.70    4.10
   7  -4  11   90.09    9.50
  -7  -4 -11   93.49   10.00
   7  -4  11   74.09    8.30
  -7  -4 -11   77.79    8.60
  -7   4 -11   72.49    9.10
  -8  -4 -11   50.19    8.60
   8  -4  11   31.60    7.00
   8  -4  11   30.10    6.90
  -8   4 -11   44.90    8.10
   9  -4  11   -0.80    5.20
  -9  -4 -11    2.00    5.80
  -9   4 -11    3.20    6.20
  -8  -5  11   31.50    7.40
  -8  -5  11   49.99    9.00
  -8   5  11   39.50    8.00
  -7  -5  11    3.30    4.20
  -7  -5  11    1.10    4.40
  -7   5  11    2.30    4.50
  -6  -5  11  114.39   11.10
  -6  -5  11   95.09    9.60
  -6   5  11   92.79    9.70
  -6   5  11  100.39    9.00
   5  -5 -11    2.50    3.30
  -5  -5  11   -1.50    2.90
  -5  -5  11    1.10    3.50
  -5   5  11    4.90    2.90
  -5   5  11    0.20    3.70
  -4  -5  11  278.87   12.30
   4  -5 -11  258.87   10.20
  -4  -5  11  257.07   12.50
  -4   5  11  249.68   12.40
  -4   5  11  275.27   11.90
  -3  -5  11   74.09    7.00
  -3  -5  11   73.79    7.40
   3  -5 -11   83.49    5.70
  -3   5  11   72.09    7.20
   3   5 -11   70.89    7.00
  -3   5  11   83.99    6.60
   2  -5 -11   81.99    5.20
  -2  -5  11   75.19    6.00
  -2  -5  11   71.89    6.90
   2   5 -11   79.69    6.70
  -2   5  11   81.69    6.40
  -2   5  11   77.79    6.30
   1  -5 -11   23.30    3.20
  -1  -5  11   18.40    3.50
  -1  -5  11   23.60    4.10
  -1   5  11   27.70    4.40
  -1   5  11   18.10    2.70
   1   5 -11   25.10    4.30
   1   5 -11   24.30    3.20
   0  -5  11    8.70    2.80
   0  -5  11   12.60    3.10
   0  -5 -11   14.10    2.80
   0   5  11   13.30    2.30
   0   5 -11   19.20    3.80
   0   5 -11   10.60    2.70
   0   5  11   13.40    3.30
   1  -5  11   18.70    3.40
  -1  -5 -11   18.70    3.30
   1  -5  11   27.90    4.30
  -1  -5 -11   23.60    3.40
  -1   5 -11   23.70    3.80
  -1   5 -11   20.80    3.80
  -2  -5 -11   73.89    5.90
  -2  -5 -11   78.59    5.30
  -2  -5 -11   81.49    5.00
   2  -5  11   79.29    6.00
   2  -5  11   86.09    6.50
  -2   5 -11   75.39    6.20
  -2   5 -11   77.19    6.20
   3  -5  11   88.09    6.70
  -3  -5 -11   72.09    5.50
   3  -5  11   84.29    7.50
  -3  -5 -11   69.49    6.60
  -3   5 -11   76.09    7.10
  -3   5 -11   84.49    7.00
  -4  -5 -11  251.87   11.70
   4  -5  11  268.07   11.60
  -4  -5 -11  263.27   10.90
   4  -5  11  257.17   11.80
  -4   5 -11  263.37   12.10
  -4   5 -11  273.77   12.60
  -5  -5 -11    0.40    2.80
   5  -5  11    0.50    3.10
  -5  -5 -11   -5.30    2.90
   5  -5  11    2.70    3.40
  -5   5 -11   -6.60    3.60
  -5   5 -11    7.30    3.60
  -6  -5 -11   96.09    9.80
   6  -5  11   96.79    9.10
  -6  -5 -11   82.79    8.50
   6  -5  11   86.49    9.40
  -6   5 -11  106.09   10.40
  -6   5 -11   96.89    9.70
   7  -5  11    1.60    4.20
   7  -5  11   -1.50    3.90
  -7  -5 -11    5.80    4.70
  -7   5 -11    0.20    4.60
  -8  -5 -11   30.90    7.30
  -8  -5 -11   32.40    7.40
   8  -5  11   30.30    7.30
   8  -5  11   36.30    7.40
  -8   5 -11   31.00    8.00
  -8  -6  11    3.70    5.60
  -8  -6  11    0.40    5.40
  -8   6  11    5.50    6.00
  -7  -6  11   94.79   11.00
  -7  -6  11   70.19   10.10
  -7   6  11   64.09    9.50
  -6  -6  11    8.30    5.10
  -6  -6  11   17.30    4.90
  -6   6  11   16.00    5.10
  -6   6  11   22.00    5.70
  -5  -6  11   92.89    9.90
  -5  -6  11   93.19    9.40
  -5   6  11   84.09    9.40
  -5   6  11   82.99    8.70
  -4  -6  11    2.40    3.30
  -4  -6  11    4.90    3.30
  -4   6  11   -3.70    2.90
  -4   6  11    7.80    4.10
   3  -6 -11   78.69    6.40
  -3  -6  11   72.59    7.60
  -3  -6  11   94.89    8.90
  -3   6  11   75.39    7.80
  -3   6  11   78.09    8.10
   3   6 -11   86.59    8.30
  -2  -6  11   25.20    4.60
  -2  -6  11   22.40    4.70
   2  -6 -11   22.30    3.70
   2   6 -11   17.40    4.30
  -2   6  11   21.30    4.60
  -2   6  11   14.10    4.00
   1  -6 -11    6.20    2.40
  -1  -6  11   -0.60    2.40
  -1  -6  11   -3.50    2.20
  -1   6  11    8.10    2.80
   1   6 -11   -5.10    2.50
   0  -6  11   59.89    6.00
   0  -6  11   52.69    5.90
   0  -6 -11   51.59    5.00
   0   6 -11   64.99    5.40
   0   6 -11   61.29    6.70
   1  -6  11   -1.90    2.10
   1  -6  11   -0.30    2.50
  -1  -6 -11    2.40    2.40
  -1   6 -11    4.50    2.50
  -1   6 -11    1.90    2.40
   1   6  11   -0.30    2.20
   2  -6  11   17.90    4.40
  -2  -6 -11   27.10    4.60
   2  -6  11   17.40    3.90
  -2   6 -11   17.80    4.00
  -2   6 -11   14.20    3.90
  -3  -6 -11   79.59    7.60
   3  -6  11   77.69    7.30
   3  -6  11   83.99    8.20
  -3   6 -11   81.09    7.70
  -3   6 -11   86.29    8.20
  -4  -6 -11    2.30    3.20
  -4  -6 -11    0.90    2.70
   4  -6  11    5.00    3.40
   4  -6  11    0.90    3.10
  -4   6 -11   14.00    4.50
  -4   6 -11   -3.30    3.30
   5  -6  11   72.89    8.40
   5  -6  11   76.99    8.00
  -5  -6 -11   84.39    8.20
  -5  -6 -11   90.19    8.50
  -5  -6 -11   88.39    9.70
  -5   6 -11   85.09    9.00
  -5   6 -11   77.49    8.90
   6  -6  11   27.60    6.00
   6  -6  11    8.50    4.50
  -6  -6 -11   19.70    5.30
  -6  -6 -11   22.90    5.40
  -6  -6 -11   33.10    6.60
  -6   6 -11   16.70    5.70
  -7  -6 -11   95.69   11.40
   7  -6  11   94.39   10.00
   7  -6  11   73.19    9.70
  -7  -6 -11   82.89    9.40
  -7   6 -11   65.79    9.90
   8  -6  11   -1.80    4.20
  -8  -6 -11    2.50    6.10
   8  -6  11   -0.60    5.50
  -8  -6 -11    0.00    4.90
  -8   6 -11   -0.90    6.20
  -7  -7  11   12.00    5.20
  -7  -7  11   22.90    7.40
  -7   7  11   17.90    6.70
  -6  -7  11   25.90    6.60
  -6  -7  11   27.00    7.60
  -6   7  11   15.00    6.20
  -5  -7  11  105.39   10.40
  -5  -7  11  118.09   11.00
  -5   7  11  125.79   11.80
  -4  -7  11  183.58   12.10
  -4  -7  11  179.98   11.00
   4   7 -11  187.88   12.00
  -4   7  11  164.88   11.60
  -3  -7  11  121.99   10.00
  -3  -7  11  114.79    8.70
  -3   7  11  115.79    9.60
   3   7 -11  137.79   10.50
  -2  -7  11   64.29    7.10
  -2  -7  11   41.90    6.10
   2  -7 -11   53.39    7.10
  -2   7  11   50.19    6.60
   2   7 -11   46.50    6.70
   1  -7 -11   25.10    4.40
  -1  -7  11   22.90    4.70
  -1  -7  11   31.30    5.40
  -1   7  11   21.20    4.60
   1   7 -11   20.30    5.00
   0  -7  11    1.70    2.70
   0  -7  11   -0.30    2.70
   0  -7 -11   -4.00    2.30
   0   7 -11    3.10    2.90
   0   7  11    0.70    2.80
   1  -7  11   21.40    4.40
  -1  -7 -11   24.50    4.70
   1  -7  11   20.30    4.80
  -1   7 -11   28.70    4.80
  -1   7 -11   29.70    5.30
   2  -7  11   48.60    6.10
   2  -7  11   45.40    6.30
  -2  -7 -11   54.79    6.50
  -2   7 -11   53.89    6.80
  -2   7 -11   61.59    7.00
  -3  -7 -11  124.99    9.50
   3  -7  11  146.19    9.20
   3  -7  11  128.59    9.80
  -3   7 -11  108.39    9.00
  -3   7 -11  122.49    9.70
   4  -7  11  169.48   10.30
  -4  -7 -11  171.38   11.40
   4  -7  11  183.58   11.40
  -4   7 -11  189.98   12.20
  -4   7 -11  184.88   12.30
  -5  -7 -11  103.59   10.40
   5  -7  11  116.99    9.40
   5  -7  11  104.29   10.10
  -5  -7 -11  109.59    9.80
  -5   7 -11  119.39   11.30
  -6  -7 -11   17.40    5.30
   6  -7  11   18.70    5.50
   6  -7  11   18.30    6.00
  -6  -7 -11   18.90    6.40
  -6   7 -11   12.90    6.60
  -7  -7 -11   18.30    7.20
   7  -7  11    9.10    5.50
  -7  -7 -11   20.60    6.30
   7  -7  11   10.60    6.20
  -7   7 -11   21.60    7.70
  -7  -8  11   -1.10    4.80
  -7  -8  11   -0.30    5.60
  -7   8  11   -4.40    5.30
  -6  -8  11   12.10    6.30
  -6  -8  11   10.80    5.50
  -6   8  11   16.40    6.60
  -5  -8  11   72.69   10.00
  -5  -8  11   74.89    9.30
  -5   8  11   78.29   10.40
  -4  -8  11   14.90    5.40
  -4  -8  11    6.30    4.80
  -4   8  11   13.70    5.50
  -3  -8  11   13.80    4.90
  -3  -8  11   10.80    5.50
   3   8 -11   23.30    5.80
  -3   8  11   22.90    5.70
  -2  -8  11   28.50    6.50
  -2  -8  11   17.00    4.70
  -2   8  11   34.20    6.50
   2   8 -11   26.10    5.90
  -1  -8  11    8.90    3.70
  -1  -8  11    3.20    3.90
  -1   8  11    9.10    4.00
   1   8 -11    4.60    4.40
   0  -8  11   84.29    8.80
   0  -8 -11   97.39    8.10
   0  -8  11  106.69    8.10
   0   8 -11   84.49    9.00
  -1  -8 -11    8.60    4.00
   1  -8  11   19.70    4.90
   1  -8  11    5.70    4.10
  -1   8 -11    8.90    4.50
  -2  -8 -11   33.10    6.10
   2  -8  11   26.70    5.20
   2  -8  11   28.00    5.80
  -2   8 -11   30.30    6.00
   3  -8  11   26.40    5.40
   3  -8  11   19.20    5.50
  -3  -8 -11   33.20    6.20
  -3   8 -11   29.20    6.20
  -3   8 -11   18.80    5.90
   4  -8  11    8.90    4.70
  -4  -8 -11    5.30    4.70
   4  -8  11   10.40    4.60
  -4   8 -11    7.30    5.00
  -5  -8 -11   76.29   10.20
   5  -8  11   67.39    8.30
   5  -8  11   55.49    8.60
  -5   8 -11   69.29   10.10
  -6  -8 -11   12.30    6.20
   6  -8  11    4.30    5.30
   6  -8  11    6.20    5.20
  -6   8 -11    6.40    6.50
  -7  -8 -11   -0.10    6.00
   7  -8  11    6.90    6.00
  -7   8 -11   -3.00    6.40
  -6  -9  11   19.80    7.10
  -6  -9  11   25.10    7.30
  -6   9  11   17.30    7.30
  -5  -9  11  104.49   12.30
  -5  -9  11   89.49   10.60
  -5   9  11  109.79   12.00
  -4  -9  11   48.60    8.60
  -4  -9  11   29.80    6.50
  -4   9  11   23.50    7.10
  -3  -9  11   43.20    7.20
  -3  -9  11   29.30    6.60
  -3   9  11   34.40    6.80
  -2  -9  11   26.20    6.30
  -2  -9  11   30.20    6.10
  -2   9  11   24.80    6.60
  -1  -9  11    3.30    4.00
  -1  -9  11    0.20    3.70
   0  -9  11    5.00    3.50
   0  -9  11    4.10    4.10
   1  -9  11    8.00    4.20
   1  -9  11    2.50    4.00
   2  -9  11   26.60    5.70
  -2  -9 -11   25.50    6.80
   2  -9  11   21.20    5.40
   3  -9  11   46.40    7.20
   3  -9  11   34.20    7.20
  -3  -9 -11   32.10    7.10
  -4  -9 -11   21.40    6.90
   4  -9  11   42.90    7.30
   4  -9  11   37.80    7.10
  -4   9 -11   20.50    6.50
  -5  -9 -11  115.69   12.60
   5  -9  11  102.69   11.70
  -5   9 -11  100.49   11.60
   6  -9  11    7.30    6.50
  -6  -9 -11   16.50    7.50
  -6   9 -11   19.20    7.70
  -4 -10  11   23.10    6.80
  -4 -10  11   28.70    7.80
  -4  10  11   16.50    7.30
  -3 -10  11   12.30    5.60
  -3 -10  11    6.30    5.80
  -2 -10  11   26.10    6.50
  -2 -10  11   16.80    5.70
  -1 -10  11    1.40    4.20
  -1 -10  11    8.00    5.20
   0 -10  11   79.09    9.70
   0 -10  11   80.39    8.70
   1 -10  11    3.50    4.40
   1 -10  11    4.50    4.60
   2 -10  11   16.20    5.80
   2 -10  11   29.90    6.50
   3 -10  11    6.90    5.30
   4 -10  11   28.40    7.40
  -2 -11  11   24.90    7.20
  -2 -11  11    7.00    5.60
  -1 -11  11    9.70    5.30
  -1 -11  11    5.90    5.60
   0 -11  11    1.70    5.40
   0 -11  11   -2.50    4.50
   1 -11  11   -0.60    4.80
   2 -11  11   12.90    6.20
  -9   0  12    1.80    5.10
  -8   0  12   40.90    6.70
  -8   0  12   44.00    7.40
  -8   0  12   37.00    6.30
  -7   0  12    9.70    3.90
  -7   0  12    8.50    4.00
  -7   0  12    7.60    3.50
  -7   0  12   10.40    4.10
  -6   0  12    3.00    2.80
  -6   0  12    1.50    2.80
  -6   0  12    3.30    3.00
  -6   0  12    6.30    3.00
  -6   0  12    1.20    2.90
  -5   0  12   23.80    4.40
  -5   0  12   22.50    3.90
  -5   0  12   20.00    3.80
  -5   0  12   22.20    3.70
  -5   0  12   22.80    3.60
  -4   0  12   12.10    2.90
  -4   0  12   15.10    2.80
  -4   0  12   16.70    2.80
  -4   0  12   22.10    3.40
  -3   0  12 2333.17   35.00
  -3   0  12 2350.56   32.00
  -3   0  12 2364.16   33.10
  -3   0  12 2411.86   32.40
   2   0 -12 4293.37   54.59
  -2   0  12 4401.26   55.19
  -2   0  12 4325.87   52.09
  -2   0  12 4282.57   49.99
   1   0 -12  175.68    4.50
  -1   0  12  176.08    6.70
   1   0 -12  171.98    6.70
  -1   0  12  171.68    5.60
  -1   0  12  166.08    4.40
   0   0  12   69.69    2.80
   0   0  12   72.69    3.70
   0   0  12   71.69    4.10
   0   0 -12   66.39    4.40
   0   0 -12   68.79    2.80
   1   0  12  172.28    4.60
  -1   0 -12  174.78    5.20
   1   0  12  162.08    5.70
  -1   0 -12  187.18    7.10
   1   0  12  185.88    6.20
  -2   0 -12 4322.97   52.49
   2   0  12 4380.56   51.69
   2   0  12 4312.17   50.69
   2   0  12 4316.67   53.69
  -2   0 -12 4345.57   55.39
   3   0  12 2393.16   35.00
  -3   0 -12 2383.16   34.30
   3   0  12 2391.76   29.30
  -3   0 -12 2400.96   35.80
  -4   0 -12   14.20    3.20
  -4   0 -12   18.50    3.40
   4   0  12   25.10    3.80
  -5   0 -12   26.40    4.60
  -5   0 -12   21.10    4.00
   5   0  12   21.70    4.10
   6   0  12    1.80    2.90
  -6   0 -12    2.40    2.50
  -6   0 -12   10.30    3.90
  -7   0 -12   10.30    4.50
   7   0  12   12.50    4.30
  -7   0 -12   10.20    4.00
  -7   0 -12    9.20    4.70
  -8   0 -12   41.20    6.90
  -8   0 -12   53.49    8.00
   8   0  12   41.60    7.50
  -9   0 -12    8.80    6.00
   9   0  12   20.30    7.00
  -9  -1  12    6.60    4.80
  -9  -1  12    4.50    5.10
  -9   1  12   -1.50    4.80
  -8  -1  12   12.80    5.20
  -8  -1  12   15.50    5.10
  -8  -1  12   20.10    5.70
  -8   1  12   23.80    6.30
  -8   1  12    9.40    4.70
  -7  -1  12  425.06   16.40
  -7  -1  12  430.76   16.00
  -7  -1  12  412.16   15.70
  -7   1  12  418.26   15.70
  -7   1  12  404.16   15.00
  -7   1  12  416.56   16.10
  -6  -1  12   36.20    5.20
  -6  -1  12   19.40    4.20
  -6  -1  12   28.50    4.70
  -6  -1  12   29.50    5.10
  -6  -1  12   34.10    5.30
  -6   1  12   35.30    4.70
  -6   1  12   39.60    5.70
  -6   1  12   34.40    5.00
  -6   1  12   44.80    5.60
  -6   1  12   26.90    4.90
  -5  -1  12  172.38    8.40
  -5  -1  12  140.19    8.20
  -5  -1  12  150.78    8.20
  -5  -1  12  162.48    8.30
  -5  -1  12  165.78    8.20
  -5   1  12  146.99    7.50
  -5   1  12  140.49    7.20
  -5   1  12  139.69    7.50
  -5   1  12  154.28    8.90
  -5   1  12  157.58    8.20
  -4  -1  12  236.98    8.80
  -4  -1  12  226.18    9.10
  -4  -1  12  223.68    9.00
  -4  -1  12  230.48    8.90
  -4   1  12  249.88    9.50
  -4   1  12  238.48    8.10
  -4   1  12  242.28    9.90
  -4   1  12  245.48    8.50
  -4   1  12  242.98    8.20
  -3  -1  12  240.88    8.60
  -3  -1  12  235.48    8.00
  -3   1  12  229.28    7.00
  -3   1  12  212.18    6.50
  -3   1  12  217.68    6.80
  -3   1  12  221.88    8.60
   2  -1 -12 1303.97   22.80
  -2  -1  12 1332.77   20.40
  -2  -1  12 1399.76   22.20
  -2   1  12 1325.57   18.00
  -2   1  12 1367.16   23.20
   2   1 -12 1336.57   21.70
  -2   1  12 1339.87   19.10
  -2   1  12 1339.37   17.70
  -1  -1  12   18.10    2.20
   1  -1 -12   15.70    2.60
  -1  -1  12   21.90    2.80
  -1   1  12   19.00    2.00
   1   1 -12   17.90    2.70
   1   1 -12   19.70    2.30
  -1   1  12   17.60    2.70
   0  -1  12    1.20    1.10
   0  -1 -12    1.30    1.60
   0  -1  12    1.70    1.50
   0   1  12    1.10    0.50
   0   1 -12    2.00    1.60
   0   1  12    1.20    1.30
   0   1 -12    1.10    1.20
   0   1  12    0.30    1.10
  -1  -1 -12   17.50    1.80
   1  -1  12   19.50    2.80
  -1  -1 -12   15.20    1.70
  -1  -1 -12   15.40    2.80
   1  -1  12   21.30    2.40
  -1   1 -12   18.30    2.40
   1   1  12   18.10    2.40
   1   1  12   17.20    2.30
  -1   1 -12   20.50    3.10
   2  -1  12 1387.76   23.00
  -2  -1 -12 1370.86   20.80
  -2  -1 -12 1389.26   23.40
  -2  -1 -12 1375.06   20.70
   2  -1  12 1402.36   21.70
   2   1  12 1336.07   20.00
  -2   1 -12 1374.66   22.10
   2   1  12 1373.06   21.60
  -2   1 -12 1351.36   23.40
  -3  -1 -12  247.68    8.30
  -3  -1 -12  247.98    9.00
   3  -1  12  224.38    8.10
   3  -1  12  222.48    8.60
  -3  -1 -12  247.68    8.30
   3  -1  12  234.28    6.00
  -3   1 -12  226.98    8.50
   3   1  12  226.38    8.20
   3   1  12  225.88    6.10
  -3   1 -12  243.18    9.40
   4  -1  12  235.88    9.30
  -4  -1 -12  243.88    9.20
  -4  -1 -12  246.88    9.50
   4  -1  12  238.78    9.60
  -4  -1 -12  247.38    9.60
  -4   1 -12  253.37    9.80
   4   1  12  233.38    9.20
  -4   1 -12  236.48    9.90
  -5  -1 -12  145.49    8.10
  -5  -1 -12  176.18    8.70
  -5  -1 -12  159.78    8.80
   5  -1  12  151.98    8.50
   5   1  12  148.29    8.20
  -5   1 -12  161.38    9.00
  -5   1 -12  157.28    8.50
  -6  -1 -12   39.60    5.60
  -6  -1 -12   44.30    6.00
   6  -1  12   43.40    6.10
  -6  -1 -12   34.90    5.70
  -6   1 -12   38.40    5.70
   6   1  12   30.80    5.30
  -6   1 -12   45.10    6.20
  -7  -1 -12  409.56   16.90
   7  -1  12  385.56   15.70
  -7  -1 -12  427.26   15.80
  -7  -1 -12  398.46   16.00
  -7   1 -12  431.46   16.50
  -7   1 -12  407.16   16.20
   7   1  12  443.86   16.70
  -8  -1 -12   21.00    6.30
   8  -1  12   23.80    6.30
  -8   1 -12   21.80    6.00
   8   1  12   21.80    5.60
   9  -1  12    3.20    5.60
  -9  -1 -12    5.30    5.40
   9   1  12    0.00    4.40
  -9   1 -12    5.30    5.50
  -9   1 -12    4.60    5.70
  -9  -2  12    3.30    5.20
  -9  -2  12    9.40    5.70
  -9   2  12    7.80    5.90
  -8  -2  12    5.20    5.00
  -8  -2  12    1.30    4.00
  -8  -2  12    5.80    4.60
  -8   2  12    5.50    4.80
  -8   2  12   15.50    5.50
  -7  -2  12    7.40    4.20
  -7  -2  12   14.60    4.70
  -7  -2  12   16.70    4.80
  -7   2  12   12.50    4.90
  -7   2  12    7.70    3.70
  -6  -2  12   16.00    4.40
  -6  -2  12   19.30    4.50
  -6  -2  12   14.10    3.50
  -6  -2  12   17.90    4.50
  -6   2  12   15.20    3.70
  -6   2  12   20.90    4.50
  -6   2  12   14.40    3.80
  -6   2  12   15.60    4.50
  -5  -2  12   75.99    6.50
  -5  -2  12   72.29    6.90
  -5  -2  12   77.29    7.10
  -5   2  12   71.59    7.40
  -5   2  12   57.69    5.30
  -5   2  12   72.89    6.50
  -4  -2  12   38.30    4.70
  -4  -2  12   50.59    5.40
  -4   2  12   47.50    4.80
  -4   2  12   42.10    3.90
  -4   2  12   41.40    5.30
  -4   2  12   48.10    5.10
  -3  -2  12  344.57   11.10
  -3  -2  12  338.97   10.50
  -3   2  12  354.16   11.00
  -3   2  12  321.77    8.00
  -3   2  12  321.07    7.60
   3   2 -12  328.57    9.10
  -2  -2  12   63.89    4.60
  -2  -2  12   65.99    4.90
  -2   2  12   64.19    2.70
   2   2 -12   60.59    4.10
  -2   2  12   62.99    2.70
   2   2 -12   63.39    4.50
  -2   2  12   62.29    4.70
   1  -2 -12   11.10    2.50
  -1  -2  12   13.20    2.50
  -1  -2  12   10.40    2.20
   1   2 -12   11.50    2.30
   1   2 -12    9.40    2.40
  -1   2  12   11.20    1.30
  -1   2  12    8.00    2.20
   0  -2  12    4.70    1.80
   0  -2  12    2.60    1.80
   0  -2 -12    7.90    2.40
   0   2 -12    6.90    2.30
   0   2  12    5.40    1.30
   0   2  12    4.00    1.90
   0   2 -12    4.90    1.80
  -1  -2 -12    6.90    2.30
   1  -2  12    7.20    2.10
   1  -2  12   15.50    2.50
  -1  -2 -12   11.90    1.60
  -1  -2 -12   11.50    1.80
  -1   2 -12   11.80    2.70
   1   2  12   13.50    2.50
  -1   2 -12   16.90    2.70
   1   2  12   11.10    2.00
  -2  -2 -12   63.29    4.80
  -2  -2 -12   64.29    4.10
   2  -2  12   66.39    4.70
  -2  -2 -12   69.59    3.90
   2  -2  12   55.59    4.40
   2   2  12   73.89    4.30
  -2   2 -12   73.69    4.90
  -2   2 -12   62.89    5.30
   2   2  12   69.09    4.20
   3  -2  12  325.27   10.70
  -3  -2 -12  341.67   10.20
  -3  -2 -12  320.57    9.50
   3  -2  12  330.87   10.60
  -3  -2 -12  336.67   10.40
  -3   2 -12  335.27   11.20
   3   2  12  318.77    8.20
  -3   2 -12  314.87   10.50
   3   2  12  330.37   10.00
   4  -2  12   42.60    4.90
  -4  -2 -12   46.90    5.10
  -4  -2 -12   50.79    5.20
   4  -2  12   39.50    4.80
  -4  -2 -12   47.20    4.90
   4   2  12   42.40    4.90
  -4   2 -12   44.90    5.10
  -4   2 -12   42.20    5.20
   5  -2  12   65.99    6.80
  -5  -2 -12   58.79    5.90
   5  -2  12   67.29    6.50
  -5  -2 -12   63.89    6.60
  -5  -2 -12   68.49    6.50
  -5   2 -12   67.39    7.00
   5   2  12   61.29    6.30
  -5   2 -12   68.59    6.70
  -6  -2 -12   25.20    5.10
   6  -2  12   20.70    4.60
  -6  -2 -12   13.30    4.00
  -6  -2 -12   11.90    3.70
  -6   2 -12   24.80    4.70
   6   2  12   15.10    4.50
  -6   2 -12   12.40    4.70
  -7  -2 -12   16.30    5.10
  -7  -2 -12   14.80    4.70
   7  -2  12   13.70    4.80
   7   2  12   16.70    4.90
  -7   2 -12    3.50    4.60
  -7   2 -12   17.70    4.60
  -8  -2 -12    4.40    4.90
   8  -2  12   -0.10    4.30
  -8   2 -12    0.00    4.60
  -9  -2 -12   10.90    6.20
   9  -2  12    3.00    5.80
  -9   2 -12    9.40    6.20
  -9  -3  12   30.30    7.70
  -9  -3  12   14.50    6.60
  -9   3  12   31.40    8.10
  -8  -3  12   31.60    6.80
  -8  -3  12   15.40    5.90
  -8   3  12   19.10    6.10
  -7  -3  12   11.00    4.60
  -7  -3  12    3.20    3.90
  -7  -3  12   10.20    4.40
  -7   3  12    5.20    4.60
  -6  -3  12   43.30    6.10
  -6  -3  12   53.09    7.20
  -6  -3  12   62.79    7.50
  -6   3  12   49.50    6.00
  -6   3  12   57.79    7.60
  -5  -3  12    9.40    3.20
  -5  -3  12    6.20    3.10
  -5   3  12    5.60    2.90
  -5   3  12    3.20    2.90
  -4  -3  12    3.00    2.50
  -4  -3  12    5.20    2.70
  -4   3  12    0.20    1.80
  -4   3  12    4.80    2.30
  -4   3  12    2.70    2.70
  -3  -3  12   17.70    3.50
   3  -3 -12   20.10    2.80
  -3  -3  12   18.40    3.50
   3   3 -12   16.90    2.70
  -3   3  12   16.60    2.30
  -3   3  12   17.50    3.60
  -2  -3  12   45.10    4.70
  -2  -3  12   51.29    4.90
   2  -3 -12   43.80    3.10
   2   3 -12   44.90    4.50
  -2   3  12   52.99    5.40
   2   3 -12   39.70    3.60
  -2   3  12   40.40    2.60
   1  -3 -12   69.19    2.40
  -1  -3  12   65.49    4.80
   1  -3 -12   67.79    3.10
  -1  -3  12   64.89    5.00
   1  -3 -12   66.59    5.10
  -1   3  12   65.59    2.50
  -1   3  12   70.19    5.20
   1   3 -12   60.79    4.30
   1   3 -12   61.69    4.80
   0  -3 -12    6.70    2.20
   0  -3 -12    7.70    1.20
   0  -3  12   13.90    2.60
   0  -3  12    7.00    2.10
   0  -3 -12    9.20    1.60
   0   3  12    8.80    2.50
   0   3 -12   10.80    2.60
   0   3  12   11.00    1.40
   0   3 -12    9.10    2.40
  -1  -3 -12   74.29    3.50
  -1  -3 -12   66.89    4.80
  -1  -3 -12   61.09    3.80
   1  -3  12   69.59    4.90
   1  -3  12   72.29    5.10
   1   3  12   63.29    4.60
  -1   3 -12   63.39    4.70
  -1   3 -12   72.49    5.20
   1   3  12   63.09    3.40
   2  -3  12   50.19    4.80
  -2  -3 -12   49.50    3.70
  -2  -3 -12   42.00    4.20
  -2  -3 -12   48.70    4.10
   2  -3  12   44.20    4.70
  -2   3 -12   45.10    4.90
  -2   3 -12   47.50    4.80
   2   3  12   44.90    4.00
   2   3  12   48.60    4.40
   3  -3  12   19.80    3.50
   3  -3  12   20.60    3.60
  -3  -3 -12   17.90    3.00
  -3  -3 -12   14.70    2.90
  -3  -3 -12   22.70    3.60
  -3   3 -12   16.90    3.70
  -3   3 -12    9.20    2.80
   3   3  12   20.40    3.20
   4  -3  12    4.90    2.60
   4  -3  12   -0.20    2.50
  -4  -3 -12    4.40    2.40
  -4  -3 -12    1.60    2.60
  -4  -3 -12    2.40    2.20
  -4   3 -12    2.60    2.30
   4   3  12    1.50    2.20
  -4   3 -12   -2.40    2.80
  -5  -3 -12    1.00    2.60
   5  -3  12    7.00    3.20
  -5  -3 -12    1.90    2.80
   5  -3  12    4.40    3.30
  -5  -3 -12    2.20    2.90
   5   3  12    3.50    2.90
  -5   3 -12    3.30    2.50
  -5   3 -12    1.20    3.30
  -6  -3 -12   63.69    7.50
   6  -3  12   52.39    7.10
   6  -3  12   62.59    7.30
  -6  -3 -12   53.29    6.60
  -6   3 -12   62.69    7.40
  -6   3 -12   58.69    7.50
  -7  -3 -12   13.00    4.50
  -7  -3 -12   11.80    4.90
   7  -3  12    4.70    4.10
   7  -3  12   22.10    5.20
  -7   3 -12    5.60    4.50
  -7   3 -12   14.40    4.70
   8  -3  12   22.40    6.40
  -8  -3 -12   28.90    7.20
  -8   3 -12   13.90    5.60
  -9  -3 -12   21.20    7.30
   9  -3  12   34.40    8.10
  -9   3 -12   30.20    7.70
  -9  -4  12    7.80    6.90
  -9  -4  12    7.80    5.10
  -9   4  12    9.40    6.50
  -8  -4  12   35.10    7.30
  -8  -4  12   43.30    8.60
  -8   4  12   38.20    7.80
  -7  -4  12    5.70    4.30
  -7  -4  12   -1.20    3.90
  -7  -4  12    0.20    3.80
  -7   4  12   -2.20    4.10
  -6  -4  12   10.20    4.20
  -6  -4  12   12.20    4.50
  -6   4  12   14.40    4.10
  -6   4  12    8.90    4.50
  -5  -4  12   16.60    4.40
   5  -4 -12    8.30    3.50
  -5  -4  12   15.40    4.40
  -5   4  12   14.90    3.80
  -5   4  12   12.90    4.50
  -4  -4  12   19.50    4.10
   4  -4 -12   18.90    3.60
  -4  -4  12   17.40    4.10
  -4   4  12   17.50    4.30
  -4   4  12   16.60    3.80
   3  -4 -12   -1.20    1.80
  -3  -4  12   -0.30    2.10
  -3  -4  12    2.00    2.60
  -3   4  12    1.50    2.60
  -3   4  12    2.30    2.20
   3   4 -12   -1.30    2.10
  -2  -4  12  317.47   11.20
  -2  -4  12  347.17   11.60
   2  -4 -12  331.87    8.80
  -2   4  12  335.97    8.20
   2   4 -12  336.87   11.70
   2   4 -12  334.17    8.70
  -2   4  12  314.37   11.60
  -1  -4  12   91.49    5.90
   1  -4 -12  103.69    4.70
  -1  -4  12  101.89    6.30
  -1   4  12   95.49    4.00
   1   4 -12  104.39    5.30
  -1   4  12   94.79    6.40
   1   4 -12   98.49    6.60
   0  -4 -12   64.79    3.90
   0  -4  12   69.29    5.30
   0  -4  12   61.49    4.90
   0  -4 -12   70.49    5.10
   0   4  12   68.79    5.50
   0   4 -12   72.79    4.90
   0   4  12   66.59    3.50
   0   4 -12   69.69    5.70
  -1  -4 -12   87.49    5.10
   1  -4  12   98.89    6.10
  -1  -4 -12   92.19    5.60
   1  -4  12  101.99    6.30
  -1   4 -12   90.09    5.70
   1   4  12  108.79    6.30
  -1   4 -12   99.79    6.20
   2  -4  12  342.97   11.60
  -2  -4 -12  360.06   10.80
   2  -4  12  345.57   11.60
  -2  -4 -12  345.37   10.50
  -2   4 -12  350.66   12.00
  -2   4 -12  354.16   11.70
  -3  -4 -12    1.50    2.10
   3  -4  12    3.30    2.50
   3  -4  12    0.70    2.30
  -3  -4 -12    3.00    2.50
  -3  -4 -12    2.40    2.10
  -3   4 -12    2.90    2.40
  -3   4 -12    5.00    2.50
  -4  -4 -12   16.90    3.40
   4  -4  12   20.70    4.20
   4  -4  12   18.70    4.20
  -4  -4 -12   19.50    3.70
  -4  -4 -12   17.60    4.00
  -4   4 -12   27.50    4.50
  -4   4 -12   16.10    4.40
  -5  -4 -12    9.40    3.80
   5  -4  12   15.50    3.90
   5  -4  12    6.50    3.70
  -5  -4 -12   15.80    4.00
  -5   4 -12   11.80    3.80
  -5   4 -12   19.30    5.30
   6  -4  12   23.20    5.00
  -6  -4 -12   17.80    4.40
   6  -4  12   19.50    5.20
  -6  -4 -12   18.50    5.50
  -6   4 -12   25.60    6.00
  -6   4 -12   20.60    4.90
  -7  -4 -12   -1.70    3.60
  -7  -4 -12    1.80    4.50
   7  -4  12    4.30    4.40
   7  -4  12    2.80    4.20
  -7   4 -12    0.50    4.40
   8  -4  12   43.20    7.50
  -8  -4 -12   37.90    8.20
  -8   4 -12   40.30    8.20
   9  -4  12   12.90    6.40
  -9  -4 -12   14.10    6.90
  -9   4 -12   14.50    7.00
  -8  -5  12    0.00    4.50
  -8  -5  12   -0.60    5.10
  -8   5  12   -1.50    5.10
  -7  -5  12   52.29    8.70
  -7  -5  12   46.00    7.30
  -7   5  12   55.19    8.60
  -6  -5  12   82.19    9.70
  -6  -5  12   72.49    8.70
  -6   5  12  100.99    9.20
  -6   5  12   94.79   10.10
  -5  -5  12    3.70    4.20
  -5  -5  12    0.60    3.00
  -5   5  12    1.70    3.70
  -5   5  12    5.20    3.90
  -4  -5  12    4.60    3.30
  -4  -5  12   -4.60    2.70
  -4   5  12    1.60    3.00
  -4   5  12    3.30    3.20
  -3  -5  12    4.60    2.70
  -3  -5  12    8.10    3.00
   3  -5 -12    1.60    2.70
  -3   5  12    5.80    3.20
   3   5 -12    5.70    3.10
  -3   5  12    4.70    3.00
   2  -5 -12  264.57    8.80
  -2  -5  12  246.88   11.10
  -2  -5  12  274.17   10.90
   2   5 -12  270.47   11.40
  -2   5  12  262.67   11.20
  -2   5  12  273.67   11.20
  -1  -5  12   13.20    3.40
   1  -5 -12   17.00    2.90
  -1  -5  12   17.40    3.60
   1   5 -12   13.50    3.50
  -1   5  12   14.40    3.60
   1   5 -12   18.30    3.00
   0  -5  12    3.80    2.40
   0  -5  12    1.50    2.00
   0  -5 -12   -0.80    1.60
   0   5 -12    0.30    1.80
   0   5  12    1.40    1.50
   0   5  12   -3.00    1.90
   0   5 -12    0.00    1.90
   1  -5  12   27.00    4.00
   1  -5  12    9.50    3.10
  -1  -5 -12   13.40    3.00
  -1  -5 -12   19.10    3.40
  -1   5 -12   20.00    3.40
  -1   5 -12   13.50    3.50
  -2  -5 -12  270.67    8.80
  -2  -5 -12  258.37   10.10
   2  -5  12  257.07   10.60
   2  -5  12  265.57   11.00
  -2  -5 -12  261.17    9.30
  -2   5 -12  292.77   11.80
  -2   5 -12  279.47   10.80
   3  -5  12    3.80    3.00
  -3  -5 -12    4.50    3.10
   3  -5  12    6.40    2.70
  -3   5 -12    1.60    2.80
  -3   5 -12    0.30    3.00
  -4  -5 -12    1.40    3.00
  -4  -5 -12    1.50    2.40
   4  -5  12    0.30    2.60
   4  -5  12    5.40    3.00
  -4   5 -12    3.50    3.70
  -4   5 -12   -0.20    2.60
  -5  -5 -12    4.10    3.90
   5  -5  12    2.10    3.70
  -5  -5 -12    1.70    3.10
   5  -5  12    6.50    4.00
  -5   5 -12    2.70    4.20
  -5   5 -12    2.80    3.70
  -6  -5 -12  107.69   10.00
  -6  -5 -12   80.29    8.40
   6  -5  12   72.59    7.90
   6  -5  12   91.09    9.60
  -6   5 -12   92.19    9.60
  -6   5 -12   84.59    9.20
  -7  -5 -12   62.69    8.90
   7  -5  12   49.40    7.40
   7  -5  12   35.00    7.10
  -7   5 -12   48.10    8.20
   8  -5  12    0.20    5.00
  -8  -5 -12   -5.40    4.80
   8  -5  12    6.70    5.10
  -8   5 -12    6.70    6.00
  -8  -6  12    9.60    6.20
  -8  -6  12    3.80    5.80
  -8   6  12    7.50    5.60
  -7  -6  12   25.70    7.30
  -7  -6  12   25.70    6.60
  -7   6  12   14.90    6.50
  -6  -6  12   49.30    7.90
  -6  -6  12   61.79    8.40
  -6   6  12   69.99    8.60
  -6   6  12   78.79    9.60
  -5  -6  12   66.49    8.70
  -5  -6  12   73.09    8.60
  -5   6  12   64.99    8.40
  -5   6  12   66.59    8.00
  -4  -6  12  164.38   10.90
  -4  -6  12  178.48   10.70
  -4   6  12  189.58   11.40
  -4   6  12  171.98   10.40
  -3  -6  12   37.60    6.20
  -3  -6  12   46.10    6.20
  -3   6  12   62.89    7.50
   3   6 -12   39.90    6.00
  -3   6  12   40.70    6.00
  -2  -6  12    4.70    2.90
  -2  -6  12   20.70    4.60
  -2   6  12    7.70    3.40
  -2   6  12   13.60    4.00
   2   6 -12   10.10    3.60
  -1  -6  12  171.58    9.00
   1  -6 -12  177.08    8.40
  -1  -6  12  168.98    9.40
  -1   6  12  191.68    9.50
  -1   6  12  201.68   10.50
   1   6 -12  178.68   10.20
   0  -6  12   20.80    4.20
   0  -6 -12   12.00    3.10
   0  -6  12   15.70    3.70
   0   6 -12   15.60    4.00
   0   6 -12   13.60    3.20
  -1  -6 -12  189.18    8.50
   1  -6  12  163.38    8.80
   1  -6  12  183.58    9.70
  -1   6 -12  194.18   10.30
  -1   6 -12  182.68    8.60
   2  -6  12    7.90    3.10
   2  -6  12    6.40    3.20
  -2  -6 -12    5.20    3.10
  -2   6 -12    9.70    3.50
  -2   6 -12    9.70    3.60
   3  -6  12   45.10    5.90
   3  -6  12   42.60    6.40
  -3  -6 -12   44.20    6.20
  -3   6 -12   49.60    6.60
  -3   6 -12   41.50    6.10
   4  -6  12  187.08   10.40
  -4  -6 -12  168.38    9.80
  -4  -6 -12  155.88    8.90
  -4  -6 -12  174.78   10.60
   4  -6  12  179.48   11.00
  -4   6 -12  166.98   11.00
  -4   6 -12  186.68   11.30
   5  -6  12   72.39    8.30
   5  -6  12   68.89    7.90
  -5  -6 -12   74.09    7.90
  -5  -6 -12   73.09    8.80
  -5  -6 -12   64.59    7.20
  -5   6 -12   68.69    8.30
  -5   6 -12   70.59    8.50
  -6  -6 -12   61.49    7.80
  -6  -6 -12   77.09    8.50
  -6  -6 -12   56.59    8.40
   6  -6  12   58.09    8.40
   6  -6  12   64.99    8.20
  -6   6 -12   50.09    8.50
   7  -6  12   20.40    6.20
  -7  -6 -12   21.20    5.90
   7  -6  12   25.20    5.90
  -7  -6 -12   26.90    6.90
  -7   6 -12   30.80    7.90
  -8  -6 -12   10.30    5.80
   8  -6  12   12.20    6.60
  -8  -6 -12   11.40    6.80
   8  -6  12    9.30    5.90
  -8   6 -12   10.10    6.40
  -7  -7  12   57.89    8.80
  -7  -7  12   51.99    9.30
  -7   7  12   47.90    8.70
  -6  -7  12    2.50    4.70
  -6  -7  12    4.60    5.40
  -6   7  12    2.70    4.00
  -6   7  12    8.00    5.30
  -5  -7  12   18.40    5.40
  -5  -7  12   14.30    5.30
  -5   7  12   17.40    6.20
  -5   7  12   13.80    5.20
  -4  -7  12    2.90    4.10
  -4  -7  12    2.50    4.20
  -4   7  12    9.40    4.30
  -4   7  12    2.80    4.30
   4   7 -12    1.20    4.10
  -3  -7  12   11.00    4.30
  -3  -7  12    0.60    3.00
   3   7 -12    9.40    3.90
  -3   7  12   -0.70    3.50
  -2  -7  12   24.20    5.20
  -2  -7  12   40.40    5.70
   2   7 -12   39.80    6.50
  -2   7  12   39.80    6.20
  -1  -7  12   52.19    6.40
  -1  -7  12   51.89    6.80
  -1   7  12   49.90    6.40
   1   7 -12   43.30    6.70
   0  -7  12   -1.40    2.20
   0  -7  12    7.60    3.30
   0   7 -12    3.80    2.90
   0   7  12    0.90    3.00
  -1  -7 -12   41.90    5.60
   1  -7  12   51.29    6.30
   1  -7  12   51.39    6.60
  -1   7 -12   52.79    7.00
  -2  -7 -12   37.00    5.60
   2  -7  12   31.70    5.20
   2  -7  12   42.70    6.30
  -2   7 -12   31.10    5.30
  -2   7 -12   29.90    5.80
  -3  -7 -12   13.80    5.00
   3  -7  12    7.50    3.90
   3  -7  12    9.90    4.20
  -3   7 -12    4.80    3.50
  -3   7 -12    5.40    4.10
   4  -7  12    6.50    3.70
   4  -7  12    3.90    3.50
  -4  -7 -12    0.80    4.40
  -4   7 -12    4.00    4.40
  -4   7 -12    3.90    4.20
   5  -7  12   19.80    5.30
   5  -7  12   13.10    4.80
  -5  -7 -12   17.30    5.70
  -5   7 -12   12.80    5.90
  -6  -7 -12    2.10    5.00
   6  -7  12    2.50    4.10
   6  -7  12   -1.10    4.20
  -6   7 -12    0.40    5.20
  -7  -7 -12   75.29    9.50
  -7  -7 -12   59.59   10.00
   7  -7  12   54.39    9.00
   7  -7  12   70.99   10.10
  -7   7 -12   85.79   11.10
  -6  -8  12    3.30    4.20
  -6  -8  12    6.10    6.00
  -6   8  12    6.20    6.10
  -5  -8  12    8.60    4.50
  -5  -8  12   -4.50    4.40
  -5   8  12   -2.80    5.10
  -4  -8  12   27.00    5.80
  -4  -8  12   20.70    6.40
  -4   8  12   21.40    6.30
  -3  -8  12  287.27   15.10
  -3  -8  12  300.07   14.50
  -3   8  12  295.17   15.10
  -2  -8  12   12.40    4.30
  -2  -8  12    4.40    4.20
   2   8 -12    6.40    4.20
  -2   8  12   17.30    5.30
  -1  -8  12    6.80    4.00
  -1  -8  12    9.90    4.50
  -1   8  12   13.60    5.00
   1   8 -12   15.40    4.90
   0  -8  12    0.90    2.70
   0  -8  12   -1.80    3.20
   0   8 -12   -3.30    3.50
   1  -8  12   15.60    4.80
   1  -8  12   15.20    4.80
  -1   8 -12   19.20    5.30
   2  -8  12   16.80    4.70
   2  -8  12    8.30    4.10
  -2   8 -12   15.20    5.10
  -3  -8 -12  251.57   13.70
   3  -8  12  291.77   13.50
   3  -8  12  271.77   14.20
  -3   8 -12  276.07   13.70
   4  -8  12   31.30    6.40
  -4  -8 -12   40.20    7.60
   4  -8  12   33.00    6.60
  -4   8 -12   33.40    6.70
  -5  -8 -12    0.70    5.40
   5  -8  12    1.40    4.40
   5  -8  12    3.30    4.90
  -5   8 -12    3.80    5.50
   6  -8  12   -1.20    4.90
  -6  -8 -12   -2.20    5.10
   6  -8  12    6.20    5.30
  -6   8 -12    3.00    6.30
  -5  -9  12   20.40    7.20
  -5  -9  12   10.80    5.60
  -5   9  12   19.90    7.40
  -4  -9  12   10.50    4.80
  -4  -9  12    4.70    4.90
  -4   9  12    9.60    6.00
  -3  -9  12   27.00    6.50
  -3  -9  12   44.50    7.90
  -3   9  12   48.50    8.10
  -2  -9  12    5.60    4.40
  -2  -9  12    5.10    4.10
  -2   9  12    3.80    4.70
  -1  -9  12   -0.80    3.90
  -1  -9  12    4.00    3.80
   0  -9  12   12.40    4.40
   0  -9  12   16.00    5.00
   1  -9  12    0.40    3.20
   1  -9  12   -2.20    3.60
   2  -9  12    9.20    4.80
   2  -9  12    0.00    3.80
   3  -9  12   33.80    7.00
   3  -9  12   35.80    6.60
   4  -9  12   17.50    5.30
   4  -9  12    0.50    4.50
  -4   9 -12    1.30    5.40
   5  -9  12   16.50    7.10
   5  -9  12   13.80    6.10
  -5   9 -12   18.70    7.00
  -4 -10  12   36.70    7.80
  -4 -10  12   35.60    8.30
  -4  10  12   36.40    8.90
  -3 -10  12    0.70    4.80
  -3 -10  12    6.40    5.00
  -2 -10  12  122.99   12.20
  -2 -10  12  125.59   11.40
  -1 -10  12   45.20    7.30
  -1 -10  12   51.19    8.20
   0 -10  12   12.80    5.20
   0 -10  12   22.70    6.10
   1 -10  12   42.10    8.10
   1 -10  12   58.19    7.90
   2 -10  12  139.09   11.20
   2 -10  12  113.79   11.50
   3 -10  12   10.90    5.90
   3 -10  12   14.20    6.50
   4 -10  12   40.60    8.20
  -2 -11  12   12.00    5.30
  -2 -11  12    6.50    6.10
  -1 -11  12    2.30    5.30
  -1 -11  12    0.80    4.70
   0 -11  12   -2.20    4.80
   0 -11  12    1.20    4.90
   1 -11  12   -1.10    4.00
   2 -11  12   12.60    6.20
  -9   0  13    7.60    6.00
  -8   0  13   -1.50    3.60
  -7   0  13    1.60    3.30
  -7   0  13    3.10    3.90
  -7   0  13    1.50    3.70
  -7   0  13   -1.50    2.90
  -6   0  13   39.40    5.30
  -6   0  13   47.70    5.80
  -6   0  13   29.70    5.20
  -6   0  13   33.80    5.10
  -6   0  13   36.30    5.10
  -5   0  13   41.40    5.00
  -5   0  13   23.50    3.90
  -5   0  13   30.40    4.40
  -5   0  13   37.40    5.20
  -5   0  13   30.20    4.20
  -4   0  13   13.30    3.20
  -4   0  13   13.50    2.80
  -4   0  13   11.30    2.60
  -4   0  13   18.30    3.00
  -3   0  13    5.70    2.10
  -3   0  13    4.50    1.80
  -3   0  13    3.20    2.20
  -3   0  13    7.30    2.00
  -2   0  13    2.80    1.30
   2   0 -13    3.90    2.40
  -2   0  13    0.40    1.60
  -2   0  13   -1.90    1.60
  -1   0  13    8.20    1.50
   1   0 -13    9.00    2.40
   1   0 -13    8.00    1.40
  -1   0  13    9.90    2.00
  -1   0  13   10.90    2.30
   0   0  13    0.60    1.20
   0   0  13    1.40    1.10
   0   0  13    0.00    1.50
   0   0 -13    1.00    0.80
   0   0 -13    0.90    1.80
   1   0  13    8.60    1.50
  -1   0 -13    6.20    2.30
  -1   0 -13    5.00    1.50
   1   0  13    7.70    1.90
   1   0  13    9.00    2.10
  -2   0 -13    3.30    1.60
   2   0  13    2.50    1.50
  -2   0 -13    2.40    2.60
   2   0  13    2.70    2.30
   3   0  13    7.10    2.60
   3   0  13    8.50    1.70
  -3   0 -13    6.90    2.10
  -3   0 -13    9.60    2.80
  -4   0 -13   17.50    3.30
  -4   0 -13   12.30    3.30
   4   0  13   12.40    3.30
  -5   0 -13   35.30    5.00
   5   0  13   36.40    4.90
  -5   0 -13   26.30    4.70
   6   0  13   27.50    5.50
  -6   0 -13   39.80    5.60
  -6   0 -13   33.40    5.50
  -7   0 -13    7.30    4.20
  -7   0 -13    0.10    3.70
   7   0  13    0.90    3.70
  -7   0 -13    6.80    4.00
  -8   0 -13   -1.70    5.00
   8   0  13    7.20    5.20
  -8   0 -13    2.50    4.90
  -9   0 -13    7.30    5.90
   9   0  13    3.30    5.70
  -9  -1  13    0.30    4.70
  -9  -1  13    5.40    5.00
  -8  -1  13    3.40    4.10
  -8  -1  13    3.50    4.30
  -8  -1  13    1.60    3.80
  -8   1  13    1.20    5.00
  -8   1  13   -3.50    4.00
  -7  -1  13   45.20    7.30
  -7  -1  13   43.00    6.50
  -7  -1  13   58.89    7.60
  -7  -1  13   52.69    7.10
  -7   1  13   38.80    6.00
  -7   1  13   47.60    7.10
  -6  -1  13   11.70    3.90
  -6  -1  13   13.40    4.10
  -6  -1  13   12.10    3.40
  -6  -1  13   10.10    3.80
  -6  -1  13    9.60    3.70
  -6   1  13   13.00    3.60
  -6   1  13   20.10    4.70
  -6   1  13   11.70    3.40
  -6   1  13    6.90    3.40
  -5  -1  13   60.79    6.20
  -5  -1  13   63.39    5.80
  -5  -1  13   49.60    5.60
  -5  -1  13   60.09    6.10
  -5  -1  13   59.19    5.90
  -5   1  13   68.89    5.90
  -5   1  13   56.39    5.60
  -5   1  13   51.79    5.50
  -5   1  13   54.59    6.30
  -5   1  13   51.79    5.10
  -4  -1  13   55.69    5.10
  -4  -1  13   48.20    4.60
  -4  -1  13   53.59    5.40
  -4  -1  13   58.79    5.60
  -4   1  13   55.29    4.80
  -4   1  13   50.79    4.40
  -4   1  13   48.10    5.40
  -4   1  13   48.40    4.20
[truncated: 274,644 more chars]
