# Supplementary material for: Hemi-Synthesis of Chiral Imine, Benzimidazole and Benzodiazepines from Essential Oil of Ammodaucus leucotrichus subsp. leucotrichus
Source: Molecules. 2019 Mar 10;24(5):975. doi: 10.3390/molecules24050975 (PMC6429316; doi:10.3390/molecules24050975)
Supplement: Supplementary file 1 [file molecules-24-00975-s001.zip › 3.cif]

 
data_3

#==============================================================================
# SUBMISSION DETAILS
#==============================================================================


_publ_contact_author_name         'Professor Artur Silva'
_publ_contact_author_address
; Department of Chemistry
  University of Aveiro
  CICECO
  3810-193
  Aveiro
  Portugal
;
_publ_contact_author_email        'artur.silva@ua.pt'
_publ_contact_author_fax          '+351 234 370084'
_publ_contact_author_phone        '+351 234 370714'

_journal_name_full                'SynLett'

loop_
_publ_author_name
_publ_author_address
_publ_author_footnote


 'Chebrouk, Farid'
;
  Laboratoire de Biomathematiques, Biophysique, Biochimie et Scientometrie 
  (L3BS)
  Faculte des Sciences de la Nature et de la Vie
  Universite de Bejaia
  06000 Bejaia
  Algeria
;
.

 'Khodir, Madani'
;
  Laboratoire de Biomathematiques, Biophysique, Biochimie et Scientometrie 
  (L3BS)
  Faculte des Sciences de la Nature et de la Vie
  Universite de Bejaia
  06000 Bejaia
  Algeria
;
.

 'Cherfaoui, Brahim'
;
  Centre de Recherche Scientifique et Technique en Analyses Physico-Chimiques
  BP 384, Bou-Ismail
  42004 Tipaza
  Algeria
;
.

 'Boukenna, Leila'
;
  Centre de Recherche Scientifique et Technique en Analyses Physico-Chimiques
  BP 384, Bou-Ismail
  42004 Tipaza
  Algeria
;
.

 'Valega, Monica'
;
  Department of Chemistry
  University of Aveiro
  QOPNA
  3810-193
  Aveiro
  Portugal
;
.

 'Talhi, Oualid'
;
  Centre de Recherche Scientifique et Technique en Analyses Physico-Chimiques
  BP 384, Bou-Ismail
  42004 Tipaza
  Algeria
  
  and
  
  Department of Chemistry
  University of Aveiro
  QOPNA
  3810-193
  Aveiro
  Portugal
;  
.

 'Mendes, Ricardo F.' 
; 
  Department of Chemistry
  University of Aveiro
  CICECO - Aveiro Institute of Materials
  3810-193
  Aveiro
  Portugal
;
.

'Almeida Paz, Filipe A.' 
; 
  Department of Chemistry
  University of Aveiro
  CICECO - Aveiro Institute of Materials
  3810-193
  Aveiro
  Portugal
;
.

 'Bachari, Khaldoun'
;
  Centre de Recherche Scientifique et Technique en Analyses Physico-Chimiques
  BP 384, Bou-Ismail
  42004 Tipaza
  Algeria
;
.

 'Silva, Artur M. S.'
;
  Department of Chemistry
  University of Aveiro
  QOPNA
  3810-193
  Aveiro
  Portugal
;
.

#=============================================================================
# start Validation Reply Form
# VALIDATION REPLY FORM
#

# Alerts LEVEL B
_vrf_PLAT201_3
;
PROBLEM: Isotropic non-H Atoms in Main Residue(s) .......          2 Report
RESPONSE: This alert arises due to the isotropic treatment used to model
the disordered terminal methyl groups belonging to both individual molecules
composing the asymmetric unit of the compound.
;

# end Validation Reply Form
#=============================================================================

 
#=============================================================================
_audit_creation_method            'SHELXL-2018/3, manual editing plus enCIFer'
_audit_creation_date              '04 December 2018'
_shelx_SHELXL_version_number      '2018/3'
#=============================================================================


_chemical_name_systematic         ?
_chemical_name_common             ?
_chemical_melting_point           ?
_chemical_formula_moiety          
 'C48 H60 N4 O2'
_chemical_formula_sum
 'C48 H60 N4 O2' 
_chemical_formula_weight          725.00

loop_
 _atom_type_symbol
 _atom_type_description
 _atom_type_scat_dispersion_real
 _atom_type_scat_dispersion_imag
 _atom_type_scat_source
 'C'  'C'   0.0033   0.0016
 'International Tables Vol C Tables 4.2.6.8 and 6.1.1.4'
 'H'  'H'   0.0000   0.0000
 'International Tables Vol C Tables 4.2.6.8 and 6.1.1.4'
 'N'  'N'   0.0061   0.0033
 'International Tables Vol C Tables 4.2.6.8 and 6.1.1.4'
 'O'  'O'   0.0106   0.0060
 'International Tables Vol C Tables 4.2.6.8 and 6.1.1.4'
 
#=============================================================================
# CRYSTAL DATA
#=============================================================================
 
_space_group_crystal_system       monoclinic
_space_group_IT_number            5
_space_group_name_H-M_alt         'I 2'
_space_group_name_Hall            'I 2y'
 
_shelx_space_group_comment
;
The symmetry employed for this shelxl refinement is uniquely defined
by the following loop, which should always be used as a source of
symmetry information in preference to the above space-group names.
They are only intended as comments.
;
 
loop_
 _space_group_symop_operation_xyz
 'x, y, z'
 '-x, y, -z'
 'x+1/2, y+1/2, z+1/2'
 '-x+1/2, y+1/2, -z+1/2'
 
_cell_length_a                    11.6743(15)
_cell_length_b                    14.0675(18)
_cell_length_c                    25.660(4)
_cell_angle_alpha                 90
_cell_angle_beta                  94.342(3)
_cell_angle_gamma                 90
_cell_volume                      4202.1(10)
_cell_formula_units_Z             4
_cell_measurement_temperature     150(2)
_cell_measurement_reflns_used     9861
_cell_measurement_theta_min       2.70
_cell_measurement_theta_max       25.45
 
_exptl_crystal_description        Plate
_exptl_crystal_colour             Colourless
_exptl_crystal_density_meas       ?
_exptl_crystal_density_method     ?
_exptl_crystal_density_diffrn     1.146          
_exptl_crystal_F_000              1568
_exptl_transmission_factor_min    0.6542
_exptl_transmission_factor_max    0.7452
_exptl_crystal_size_max           0.260
_exptl_crystal_size_mid           0.240
_exptl_crystal_size_min           0.090
_exptl_absorpt_coefficient_mu     0.070
_shelx_estimated_absorpt_T_min    0.982
_shelx_estimated_absorpt_T_max    0.994
_exptl_absorpt_correction_type    multi-scan
_exptl_absorpt_correction_T_min   ?
_exptl_absorpt_correction_T_max   ?
_exptl_absorpt_process_details    
; 
  SADABS-2016/2
  Reference: Krause, L., Herbst-Irmer, R., Sheldrick G.M. & Stalke D.,
  J. Appl. Cryst. 48 (2015) 3-10.
; 
 
#=============================================================================
# EXPERIMENTAL DATA
#============================================================================= 

_exptl_special_details
;
 ?
;
_diffrn_ambient_temperature       150(2)
_diffrn_radiation_wavelength      0.71073 
_diffrn_radiation_type            MoK\a 
_diffrn_radiation_source          'Sealed tube' 
_diffrn_radiation_monochromator   'Multi-layer X-ray mirror' 
_diffrn_measurement_device_type   'Bruker D8 QUEST '
_diffrn_measurement_method        '\w / \f scans'
_diffrn_detector_area_resol_mean  10.4167 
_diffrn_standards_number          0 
_diffrn_standards_interval_count  . 
_diffrn_standards_interval_time   . 
_diffrn_standards_decay_%         ?
_diffrn_reflns_number             19538
_diffrn_reflns_av_unetI/netI      0.0387
_diffrn_reflns_av_R_equivalents   0.0314
_diffrn_reflns_limit_h_min        -14
_diffrn_reflns_limit_h_max        12
_diffrn_reflns_limit_k_min        -16
_diffrn_reflns_limit_k_max        16
_diffrn_reflns_limit_l_min        -30
_diffrn_reflns_limit_l_max        30
_diffrn_reflns_theta_min          3.735
_diffrn_reflns_theta_max          25.343
_diffrn_reflns_theta_full         25.242
_diffrn_measured_fraction_theta_max   0.995
_diffrn_measured_fraction_theta_full  0.995
_diffrn_reflns_Laue_measured_fraction_max    0.995
_diffrn_reflns_Laue_measured_fraction_full   0.995
_diffrn_reflns_point_group_measured_fraction_max   0.986
_diffrn_reflns_point_group_measured_fraction_full  0.987
_reflns_number_total              7592
_reflns_number_gt                 6365
_reflns_threshold_expression      'I > 2\s(I)'
_reflns_Friedel_coverage          0.898
_reflns_Friedel_fraction_max      0.977
_reflns_Friedel_fraction_full     0.978
 
_reflns_special_details
;
 Reflections were merged by SHELXL according to the crystal
 class for the calculation of statistics and refinement.
 
 _reflns_Friedel_fraction is defined as the number of unique
 Friedel pairs measured divided by the number that would be
 possible theoretically, ignoring centric projections and
 systematic absences.
;
 
_computing_data_collection        'APEX3 2012.4 (Bruker, 2012b)'
_computing_cell_refinement        'SAINT V8.27b (Bruker, 2012a)'
_computing_data_reduction         'SAINT V8.27b (Bruker, 2012a)'
_computing_structure_solution     'SHELXT 2014/5 (Sheldrick, 2014)'
_computing_structure_refinement   'SHELXL-2018/3 (Sheldrick, 2017)'
_computing_molecular_graphics     'DIAMOND (Brandenburg, 1999)'  
_computing_publication_material   'SHELXL-2018/3 (Sheldrick, 2015)'


#=============================================================================
# REFINEMENT DATA
#=============================================================================

_refine_special_details           ?
_refine_ls_structure_factor_coef  Fsqd
_refine_ls_matrix_type            full
_refine_ls_weighting_scheme       calc
_refine_ls_weighting_details
'w=1/[\s^2^(Fo^2^)+(0.0406P)^2^+4.0627P] where P=(Fo^2^+2Fc^2^)/3'
_atom_sites_solution_primary      ?
_atom_sites_solution_secondary    ?
_atom_sites_solution_hydrogens    mixed
_refine_ls_hydrogen_treatment     mixed
_refine_ls_extinction_method      none
_refine_ls_extinction_coef        .
_refine_ls_abs_structure_details
;
 Flack x determined using 2580 quotients [(I+)-(I-)]/[(I+)+(I-)]
 (Parsons, Flack and Wagner, Acta Cryst. B69 (2013) 249-259).
;
_refine_ls_abs_structure_Flack    1.7(9)
_chemical_absolute_configuration  rm
_refine_ls_number_reflns          7592
_refine_ls_number_parameters      504
_refine_ls_number_restraints      5
_refine_ls_R_factor_all           0.0681
_refine_ls_R_factor_gt            0.0525
_refine_ls_wR_factor_ref          0.1208
_refine_ls_wR_factor_gt           0.1123
_refine_ls_goodness_of_fit_ref    1.124
_refine_ls_restrained_S_all       1.124
_refine_ls_shift/su_max           0.000
_refine_ls_shift/su_mean          0.000


#=============================================================================
# ATOMIC COORDINATES AND DISPLACEMENT PARAMETERS
#=============================================================================
 
loop_
 _atom_site_label
 _atom_site_type_symbol
 _atom_site_fract_x
 _atom_site_fract_y
 _atom_site_fract_z
 _atom_site_U_iso_or_equiv
 _atom_site_adp_type
 _atom_site_occupancy
 _atom_site_site_symmetry_order  
 _atom_site_calc_flag
 _atom_site_refinement_flags_posn
 _atom_site_refinement_flags_adp
 _atom_site_refinement_flags_occupancy
 _atom_site_disorder_assembly
 _atom_site_disorder_group
C1 C 0.5462(4) 0.6979(3) 0.38341(17) 0.0310(10) Uani 1 1 d . . . . .
H1 H 0.609295 0.655088 0.385279 0.037 Uiso 1 1 calc R U . . .
C2 C 0.5377(4) 0.7629(4) 0.42351(19) 0.0376(12) Uani 1 1 d . . . . .
H2 H 0.594163 0.764825 0.452155 0.045 Uiso 1 1 calc R U . . .
C3 C 0.4454(4) 0.8251(3) 0.42114(17) 0.0345(11) Uani 1 1 d . . . . .
H3 H 0.437639 0.869758 0.448437 0.041 Uiso 1 1 calc R U . . .
C4 C 0.3640(4) 0.8220(3) 0.37848(15) 0.0274(10) Uani 1 1 d . . . . .
H4 H 0.301706 0.865604 0.376633 0.033 Uiso 1 1 calc R U . . .
C5 C 0.3727(4) 0.7555(3) 0.33831(15) 0.0220(9) Uani 1 1 d . . . . .
C6 C 0.4661(4) 0.6929(3) 0.34061(16) 0.0237(10) Uani 1 1 d . . . . .
C7 C 0.2508(4) 0.6984(3) 0.25706(15) 0.0201(9) Uani 1 1 d . . . . .
C8 C 0.1595(4) 0.7405(3) 0.21869(15) 0.0238(9) Uani 1 1 d . . . . .
H8A H 0.197512 0.775592 0.191347 0.029 Uiso 1 1 calc R U . . .
H8B H 0.113350 0.786709 0.237326 0.029 Uiso 1 1 calc R U . . .
C9 C 0.0790(4) 0.6659(3) 0.19248(16) 0.0250(10) Uani 1 1 d . . . . .
C10 C 0.1545(4) 0.5913(4) 0.16889(16) 0.0301(10) Uani 1 1 d . . . . .
H10A H 0.105202 0.538636 0.154845 0.036 Uiso 1 1 calc R U . . .
H10B H 0.191476 0.620261 0.139237 0.036 Uiso 1 1 calc R U . . .
C11 C 0.2470(4) 0.5510(3) 0.20708(15) 0.0248(10) Uani 1 1 d . . . . .
C12 C 0.2905(4) 0.6075(3) 0.25114(15) 0.0219(9) Uani 1 1 d . . . . .
C13 C 0.0046(4) 0.6211(3) 0.23239(19) 0.0347(11) Uani 1 1 d . . . . .
H13A H -0.038557 0.670955 0.249017 0.052 Uiso 1 1 calc R U . . .
H13B H 0.053775 0.587602 0.259049 0.052 Uiso 1 1 calc R U . . .
H13C H -0.049210 0.575954 0.214684 0.052 Uiso 1 1 calc R U . . .
C14 C -0.0004(4) 0.7125(3) 0.14919(17) 0.0340(11) Uani 1 1 d . . . . .
H14A H -0.044986 0.763187 0.164303 0.051 Uiso 1 1 calc R U . . .
H14B H -0.052796 0.664594 0.133123 0.051 Uiso 1 1 calc R U . . .
H14C H 0.046075 0.739423 0.122570 0.051 Uiso 1 1 calc R U . . .
C15 C 0.3794(3) 0.5620(3) 0.28825(15) 0.0232(9) Uani 1 1 d . . . . .
H15 H 0.409588 0.506037 0.269547 0.028 Uiso 1 1 calc R U . . .
C16 C 0.3359(4) 0.5241(3) 0.33853(15) 0.0232(9) Uani 1 1 d . . . . .
C17 C 0.2343(4) 0.5479(3) 0.35570(16) 0.0287(10) Uani 1 1 d . . . . .
H17 H 0.182433 0.583694 0.333157 0.034 Uiso 1 1 calc R U . . .
C18 C 0.4199(4) 0.4618(4) 0.37047(16) 0.0319(11) Uani 1 1 d . . . . .
H18A H 0.486408 0.500746 0.383766 0.038 Uiso 1 1 calc R U . . .
H18B H 0.448558 0.411795 0.347621 0.038 Uiso 1 1 calc R U . . .
C19 C 0.3669(4) 0.4146(3) 0.41666(15) 0.0346(10) Uani 1 1 d . . . . .
H19A H 0.315741 0.362123 0.403915 0.042 Uiso 1 1 calc R U . . .
H19B H 0.428483 0.387575 0.440894 0.042 Uiso 1 1 calc R U . . .
C20 C 0.2985(4) 0.4876(3) 0.44540(14) 0.0367(10) Uani 1 1 d . . . . .
H20 H 0.349816 0.543715 0.452686 0.044 Uiso 1 1 calc R U . . .
C21 C 0.1979(4) 0.5211(4) 0.40855(16) 0.0363(11) Uani 1 1 d . . . . .
H21A H 0.139847 0.469795 0.404538 0.044 Uiso 1 1 calc R U . . .
H21B H 0.161424 0.576741 0.424172 0.044 Uiso 1 1 calc R U . . .
C22 C 0.2619(4) 0.4531(4) 0.49736(16) 0.0441(13) Uani 1 1 d . . . . .
C23 C 0.3099(6) 0.4909(6) 0.54135(19) 0.077(2) Uani 1 1 d . . . . .
H23A H 0.279748 0.476753 0.573825 0.092 Uiso 1 1 calc R U . . .
H23B H 0.374358 0.531859 0.540244 0.092 Uiso 1 1 calc R U . . .
C25 C 1.0302(4) 0.7390(3) 0.42817(17) 0.0353(11) Uani 1 1 d . . . . .
H25 H 1.082939 0.738421 0.458226 0.042 Uiso 1 1 calc R U . . .
C26 C 0.9404(4) 0.6743(3) 0.42359(17) 0.0325(11) Uani 1 1 d . . . . .
H26 H 0.932042 0.628438 0.450220 0.039 Uiso 1 1 calc R U . . .
C27 C 0.8629(4) 0.6769(3) 0.37992(15) 0.0244(10) Uani 1 1 d . . . . .
H27 H 0.801136 0.632753 0.377006 0.029 Uiso 1 1 calc R U . . .
C28 C 0.8741(3) 0.7432(3) 0.34014(15) 0.0224(9) Uani 1 1 d . . . . .
C29 C 0.9654(4) 0.8079(3) 0.34420(16) 0.0241(9) Uani 1 1 d . . . . .
C30 C 1.0425(4) 0.8044(4) 0.38885(17) 0.0323(11) Uani 1 1 d . . . . .
H30 H 1.104633 0.848128 0.392115 0.039 Uiso 1 1 calc R U . . .
C31 C 0.7565(4) 0.8013(3) 0.25832(15) 0.0215(9) Uani 1 1 d . . . . .
C32 C 0.6707(4) 0.7588(3) 0.21741(15) 0.0231(9) Uani 1 1 d . . . . .
H31A H 0.625621 0.709263 0.234133 0.028 Uiso 1 1 calc R U . . .
H32B H 0.713292 0.727394 0.190251 0.028 Uiso 1 1 calc R U . . .
C33 C 0.5874(4) 0.8317(3) 0.19098(16) 0.0248(10) Uani 1 1 d . . . . .
C34 C 0.6595(4) 0.9130(3) 0.17119(17) 0.0307(10) Uani 1 1 d . . . . .
H34A H 0.698546 0.890198 0.140626 0.037 Uiso 1 1 calc R U . . .
H34B H 0.607323 0.965307 0.159098 0.037 Uiso 1 1 calc R U . . .
C35 C 0.7492(4) 0.9523(3) 0.21120(15) 0.0232(9) Uani 1 1 d . . . . .
C36 C 0.7923(4) 0.8943(3) 0.25455(15) 0.0223(10) Uani 1 1 d . . . . .
C37 C 0.5044(4) 0.8683(4) 0.23004(19) 0.0348(11) Uani 1 1 d . . . . .
H37A H 0.459169 0.815142 0.242143 0.052 Uiso 1 1 calc R U . . .
H37B H 0.452836 0.915744 0.212951 0.052 Uiso 1 1 calc R U . . .
H37C H 0.548352 0.897435 0.259958 0.052 Uiso 1 1 calc R U . . .
C38 C 0.5161(4) 0.7868(3) 0.14477(18) 0.0368(12) Uani 1 1 d . . . . .
H38A H 0.469861 0.734686 0.157379 0.055 Uiso 1 1 calc R U . . .
H38B H 0.567501 0.762162 0.119504 0.055 Uiso 1 1 calc R U . . .
H38C H 0.465186 0.834985 0.127866 0.055 Uiso 1 1 calc R U . . .
C39 C 0.8807(4) 0.9392(3) 0.29269(15) 0.0232(9) Uani 1 1 d . . . . .
H39 H 0.911069 0.995981 0.274811 0.028 Uiso 1 1 calc R U . . .
C40 C 0.8353(4) 0.9747(3) 0.34325(14) 0.0223(9) Uani 1 1 d . . . . .
C41 C 0.7345(4) 0.9518(3) 0.35914(15) 0.0246(9) Uani 1 1 d . . . . .
H41 H 0.685458 0.913258 0.336730 0.030 Uiso 1 1 calc R U . . .
C42 C 0.9183(4) 1.0358(3) 0.37652(15) 0.0283(10) Uani 1 1 d . . . . .
H42A H 0.917148 1.101008 0.362035 0.034 Uiso 1 1 calc R U . . .
H42B H 0.996913 1.010216 0.374714 0.034 Uiso 1 1 calc R U . . .
C43 C 0.8905(3) 1.0402(3) 0.43361(15) 0.0352(10) Uani 1 1 d . . . . .
H43A H 0.937271 1.090449 0.451895 0.042 Uiso 1 1 calc R U . . .
H43B H 0.910234 0.978732 0.450846 0.042 Uiso 1 1 calc R U . . .
C44 C 0.6909(4) 0.9825(3) 0.41064(15) 0.0307(10) Uani 1 1 d . . . . .
H44A H 0.690739 0.926836 0.434230 0.037 Uiso 1 1 calc R U . . .
H44B H 0.610667 1.004858 0.404355 0.037 Uiso 1 1 calc R U . . .
C45 C 0.7627(3) 1.0613(3) 0.43762(15) 0.0350(10) Uani 1 1 d . . . . .
H45 H 0.744479 1.121768 0.418243 0.042 Uiso 1 1 calc R U . . .
C46 C 0.7311(4) 1.0751(4) 0.49380(19) 0.0548(16) Uani 1 1 d . . . . .
C47 C 0.7791(5) 1.0167(5) 0.5338(2) 0.0692(18) Uani 1 1 d . . . . .
H47A H 0.773740 1.034134 0.569294 0.083 Uiso 1 1 calc R U . . .
H47B H 0.817153 0.959577 0.525475 0.083 Uiso 1 1 calc R U . . .
C48 C 0.6736(11) 1.1599(9) 0.5008(4) 0.079(3) Uiso 0.6 1 d . . P A 3
H48A H 0.710824 1.211093 0.482475 0.118 Uiso 0.6 1 calc R U P A 3
H48B H 0.675898 1.174756 0.538208 0.118 Uiso 0.6 1 calc R U P A 3
H48C H 0.593545 1.153722 0.486783 0.118 Uiso 0.6 1 calc R U P A 3
C48' C 0.6130(13) 1.0984(11) 0.5043(6) 0.064(4) Uiso 0.4 1 d . . P A 4
H48D H 0.578956 1.139380 0.476394 0.097 Uiso 0.4 1 calc R U P A 4
H48E H 0.568050 1.039823 0.505787 0.097 Uiso 0.4 1 calc R U P A 4
H48F H 0.612973 1.131809 0.537849 0.097 Uiso 0.4 1 calc R U P A 4
N2 N 0.4787(3) 0.6266(3) 0.30025(13) 0.0253(8) Uani 1 1 d D . . . .
H2N H 0.544(2) 0.594(3) 0.3034(17) 0.038 Uiso 1 1 d D U . . .
N3 N 0.2868(3) 0.7606(2) 0.29569(12) 0.0208(8) Uani 1 1 d D . . . .
H3N H 0.250(3) 0.8148(18) 0.2921(17) 0.031 Uiso 1 1 d D U . . .
N4 N 0.9803(3) 0.8732(3) 0.30399(13) 0.0253(8) Uani 1 1 d D . . . .
H4N H 1.046(2) 0.904(3) 0.3117(16) 0.038 Uiso 1 1 d D U . . .
N5 N 0.7923(3) 0.7382(2) 0.29636(13) 0.0220(8) Uani 1 1 d D . . . .
H5N H 0.764(4) 0.6804(16) 0.2930(17) 0.033 Uiso 1 1 d D U . . .
O1 O 0.7844(3) 1.0350(2) 0.20491(11) 0.0293(7) Uani 1 1 d . . . . .
O2 O 0.2855(3) 0.4698(2) 0.19859(11) 0.0329(7) Uani 1 1 d . . . . .
C24 C 0.2044(14) 0.3556(12) 0.4989(6) 0.055(4) Uiso 0.4 1 d . . P B 1
H24A H 0.253128 0.307997 0.483635 0.083 Uiso 0.4 1 calc R U P B 1
H24B H 0.129566 0.357858 0.478885 0.083 Uiso 0.4 1 calc R U P B 1
H24C H 0.193609 0.338541 0.535251 0.083 Uiso 0.4 1 calc R U P B 1
C24' C 0.1595(10) 0.3878(8) 0.4984(4) 0.067(3) Uiso 0.6 1 d . . P B 2
H24D H 0.089411 0.422852 0.487138 0.100 Uiso 0.6 1 calc R U P B 2
H24E H 0.153846 0.364163 0.534077 0.100 Uiso 0.6 1 calc R U P B 2
H24F H 0.168752 0.334094 0.474824 0.100 Uiso 0.6 1 calc R U P B 2
 
loop_
 _atom_site_aniso_label
 _atom_site_aniso_U_11
 _atom_site_aniso_U_22
 _atom_site_aniso_U_33
 _atom_site_aniso_U_23
 _atom_site_aniso_U_13
 _atom_site_aniso_U_12
C1 0.025(3) 0.025(2) 0.042(2) 0.0046(19) -0.0006(19) -0.001(2)
C2 0.032(3) 0.034(3) 0.045(3) 0.002(2) -0.011(2) -0.005(2)
C3 0.040(3) 0.029(3) 0.034(2) -0.004(2) -0.005(2) -0.009(2)
C4 0.025(2) 0.027(2) 0.031(2) -0.0019(18) 0.0008(18) -0.001(2)
C5 0.023(2) 0.018(2) 0.025(2) 0.0018(17) 0.0014(17) -0.004(2)
C6 0.022(2) 0.021(2) 0.029(2) 0.0041(17) 0.0046(17) -0.004(2)
C7 0.019(2) 0.021(2) 0.0208(19) 0.0010(16) 0.0082(16) -0.0007(19)
C8 0.023(2) 0.023(2) 0.0250(19) 0.0003(17) 0.0014(17) 0.0057(19)
C9 0.027(3) 0.019(2) 0.029(2) -0.0036(17) 0.0005(18) 0.0023(19)
C10 0.032(3) 0.032(3) 0.026(2) -0.0074(19) 0.0001(18) 0.005(2)
C11 0.025(2) 0.023(2) 0.028(2) -0.0030(18) 0.0088(17) 0.003(2)
C12 0.022(2) 0.023(2) 0.0213(19) 0.0006(16) 0.0041(17) 0.0043(19)
C13 0.028(3) 0.035(3) 0.042(2) 0.002(2) 0.009(2) 0.000(2)
C14 0.036(3) 0.028(3) 0.036(2) -0.0015(19) -0.010(2) -0.001(2)
C15 0.024(2) 0.021(2) 0.0254(19) 0.0003(17) 0.0070(16) 0.0018(19)
C16 0.025(2) 0.017(2) 0.0275(19) -0.0026(16) 0.0020(17) -0.0012(19)
C17 0.031(3) 0.026(2) 0.029(2) 0.0016(19) 0.0038(18) 0.001(2)
C18 0.037(3) 0.030(3) 0.030(2) 0.0057(18) 0.0054(18) 0.004(2)
C19 0.040(3) 0.031(2) 0.033(2) 0.0093(18) 0.0026(18) 0.001(2)
C20 0.044(3) 0.039(2) 0.0282(19) -0.0019(18) 0.0054(17) -0.010(2)
C21 0.035(3) 0.039(3) 0.036(2) 0.002(2) 0.012(2) 0.001(2)
C22 0.055(3) 0.049(3) 0.030(2) 0.001(2) 0.011(2) -0.013(2)
C23 0.101(5) 0.103(5) 0.028(2) -0.002(3) 0.010(3) -0.037(4)
C25 0.037(3) 0.033(3) 0.034(2) 0.001(2) -0.010(2) 0.005(2)
C26 0.034(3) 0.032(3) 0.031(2) 0.007(2) -0.0027(19) 0.001(2)
C27 0.026(2) 0.019(2) 0.029(2) -0.0002(17) 0.0043(18) 0.001(2)
C28 0.020(2) 0.024(2) 0.0232(19) -0.0019(17) 0.0041(16) 0.002(2)
C29 0.022(2) 0.021(2) 0.030(2) -0.0043(17) 0.0038(18) 0.001(2)
C30 0.022(2) 0.035(3) 0.039(2) -0.006(2) -0.0047(19) -0.002(2)
C31 0.021(2) 0.022(2) 0.021(2) -0.0006(16) 0.0038(17) 0.0035(19)
C32 0.030(2) 0.014(2) 0.0250(19) 0.0006(16) -0.0001(17) -0.0001(19)
C33 0.027(3) 0.020(2) 0.027(2) 0.0013(17) -0.0008(18) -0.0020(19)
C34 0.038(3) 0.022(2) 0.031(2) 0.0072(19) -0.0033(19) -0.002(2)
C35 0.024(2) 0.020(2) 0.0266(19) 0.0004(17) 0.0059(17) 0.0012(19)
C36 0.026(3) 0.020(2) 0.0220(19) 0.0004(16) 0.0083(18) 0.0011(19)
C37 0.029(3) 0.029(2) 0.046(3) -0.003(2) -0.002(2) 0.000(2)
C38 0.044(3) 0.021(3) 0.043(3) 0.0051(19) -0.014(2) -0.002(2)
C39 0.024(2) 0.020(2) 0.0256(19) 0.0008(16) 0.0026(16) -0.0075(19)
C40 0.029(2) 0.017(2) 0.0217(18) -0.0012(16) 0.0025(17) -0.0023(19)
C41 0.024(2) 0.022(2) 0.028(2) -0.0036(18) 0.0022(17) -0.001(2)
C42 0.027(2) 0.025(2) 0.032(2) -0.0045(18) -0.0013(17) -0.007(2)
C43 0.031(2) 0.041(3) 0.033(2) -0.0103(19) -0.0019(17) 0.001(2)
C44 0.033(3) 0.031(3) 0.029(2) -0.0033(19) 0.0089(18) 0.002(2)
C45 0.033(2) 0.038(2) 0.033(2) -0.0126(18) -0.0008(17) 0.004(2)
C46 0.043(3) 0.077(4) 0.044(3) -0.031(3) 0.000(2) 0.017(3)
C47 0.086(4) 0.089(5) 0.036(3) 0.006(3) 0.021(3) 0.025(4)
N2 0.018(2) 0.028(2) 0.0310(18) 0.0007(15) 0.0050(15) 0.0018(16)
N3 0.019(2) 0.0193(19) 0.0234(16) 0.0001(14) 0.0005(14) 0.0023(16)
N4 0.020(2) 0.024(2) 0.0327(18) -0.0019(15) 0.0061(16) -0.0070(16)
N5 0.024(2) 0.0160(18) 0.0262(16) 0.0019(14) 0.0025(14) -0.0023(16)
O1 0.0309(17) 0.0175(16) 0.0395(16) 0.0075(13) 0.0031(13) -0.0033(14)
O2 0.0307(17) 0.0247(18) 0.0435(16) -0.0097(13) 0.0034(13) 0.0065(14)
 
_geom_special_details
;
 All esds (except the esd in the dihedral angle between two l.s. planes)
 are estimated using the full covariance matrix.  The cell esds are taken
 into account individually in the estimation of esds in distances, angles
 and torsion angles; correlations between esds in cell parameters are only
 used when they are defined by crystal symmetry.  An approximate (isotropic)
 treatment of cell esds is used for estimating esds involving l.s. planes.
;
 
loop_
 _geom_bond_atom_site_label_1
 _geom_bond_atom_site_label_2
 _geom_bond_distance
 _geom_bond_site_symmetry_2
 _geom_bond_publ_flag
C1 C2 1.386(7) . ?
C1 C6 1.389(6) . ?
C1 H1 0.9500 . ?
C2 C3 1.385(7) . ?
C2 H2 0.9500 . ?
C3 C4 1.395(6) . ?
C3 H3 0.9500 . ?
C4 C5 1.402(6) . ?
C4 H4 0.9500 . ?
C5 C6 1.400(6) . ?
C5 N3 1.429(5) . ?
C6 N2 1.409(5) . ?
C7 N3 1.364(5) . ?
C7 C12 1.372(6) . ?
C7 C8 1.516(6) . ?
C8 C9 1.530(6) . ?
C8 H8A 0.9900 . ?
C8 H8B 0.9900 . ?
C9 C10 1.525(6) . ?
C9 C13 1.528(6) . ?
C9 C14 1.538(6) . ?
C10 C11 1.512(6) . ?
C10 H10A 0.9900 . ?
C10 H10B 0.9900 . ?
C11 O2 1.252(5) . ?
C11 C12 1.443(6) . ?
C12 C15 1.498(5) . ?
C13 H13A 0.9800 . ?
C13 H13B 0.9800 . ?
C13 H13C 0.9800 . ?
C14 H14A 0.9800 . ?
C14 H14B 0.9800 . ?
C14 H14C 0.9800 . ?
C15 N2 1.486(6) . ?
C15 C16 1.519(5) . ?
C15 H15 1.0000 . ?
C16 C17 1.338(6) . ?
C16 C18 1.510(6) . ?
C17 C21 1.500(6) . ?
C17 H17 0.9500 . ?
C18 C19 1.529(6) . ?
C18 H18A 0.9900 . ?
C18 H18B 0.9900 . ?
C19 C20 1.524(6) . ?
C19 H19A 0.9900 . ?
C19 H19B 0.9900 . ?
C20 C22 1.510(6) . ?
C20 C21 1.526(6) . ?
C20 H20 1.0000 . ?
C21 H21A 0.9900 . ?
C21 H21B 0.9900 . ?
C22 C23 1.332(7) . ?
C22 C24' 1.510(12) . ?
C22 C24 1.529(16) . ?
C23 H23A 0.9500 . ?
C23 H23B 0.9500 . ?
C25 C30 1.381(7) . ?
C25 C26 1.387(7) . ?
C25 H25 0.9500 . ?
C26 C27 1.386(6) . ?
C26 H26 0.9500 . ?
C27 C28 1.396(6) . ?
C27 H27 0.9500 . ?
C28 C29 1.400(6) . ?
C28 N5 1.420(5) . ?
C29 N4 1.402(6) . ?
C29 C30 1.403(6) . ?
C30 H30 0.9500 . ?
C31 N5 1.362(5) . ?
C31 C36 1.379(6) . ?
C31 C32 1.518(6) . ?
C32 C33 1.536(6) . ?
C32 H31A 0.9900 . ?
C32 H32B 0.9900 . ?
C33 C34 1.529(6) . ?
C33 C38 1.533(6) . ?
C33 C37 1.534(6) . ?
C34 C35 1.515(6) . ?
C34 H34A 0.9900 . ?
C34 H34B 0.9900 . ?
C35 O1 1.248(5) . ?
C35 C36 1.439(6) . ?
C36 C39 1.506(6) . ?
C37 H37A 0.9800 . ?
C37 H37B 0.9800 . ?
C37 H37C 0.9800 . ?
C38 H38A 0.9800 . ?
C38 H38B 0.9800 . ?
C38 H38C 0.9800 . ?
C39 N4 1.498(6) . ?
C39 C40 1.523(6) . ?
C39 H39 1.0000 . ?
C40 C41 1.314(6) . ?
C40 C42 1.510(5) . ?
C41 C44 1.514(5) . ?
C41 H41 0.9500 . ?
C42 C43 1.526(5) . ?
C42 H42A 0.9900 . ?
C42 H42B 0.9900 . ?
C43 C45 1.532(6) . ?
C43 H43A 0.9900 . ?
C43 H43B 0.9900 . ?
C44 C45 1.524(6) . ?
C44 H44A 0.9900 . ?
C44 H44B 0.9900 . ?
C45 C46 1.527(6) . ?
C45 H45 1.0000 . ?
C46 C48 1.387(13) . ?
C46 C47 1.398(8) . ?
C46 C48' 1.462(15) . ?
C47 H47A 0.9500 . ?
C47 H47B 0.9500 . ?
C48 H48A 0.9800 . ?
C48 H48B 0.9800 . ?
C48 H48C 0.9800 . ?
C48' H48D 0.9800 . ?
C48' H48E 0.9800 . ?
C48' H48F 0.9800 . ?
N2 H2N 0.883(14) . ?
N3 H3N 0.880(14) . ?
N4 H4N 0.887(14) . ?
N5 H5N 0.881(14) . ?
C24 H24A 0.9800 . ?
C24 H24B 0.9800 . ?
C24 H24C 0.9800 . ?
C24' H24D 0.9800 . ?
C24' H24E 0.9800 . ?
C24' H24F 0.9800 . ?
 
loop_
 _geom_angle_atom_site_label_1
 _geom_angle_atom_site_label_2
 _geom_angle_atom_site_label_3
 _geom_angle
 _geom_angle_site_symmetry_1
 _geom_angle_site_symmetry_3
 _geom_angle_publ_flag
C2 C1 C6 122.6(4) . . ?
C2 C1 H1 118.7 . . ?
C6 C1 H1 118.7 . . ?
C3 C2 C1 118.9(4) . . ?
C3 C2 H2 120.5 . . ?
C1 C2 H2 120.5 . . ?
C2 C3 C4 119.7(4) . . ?
C2 C3 H3 120.1 . . ?
C4 C3 H3 120.1 . . ?
C3 C4 C5 121.0(4) . . ?
C3 C4 H4 119.5 . . ?
C5 C4 H4 119.5 . . ?
C6 C5 C4 119.3(4) . . ?
C6 C5 N3 124.3(4) . . ?
C4 C5 N3 116.3(4) . . ?
C1 C6 C5 118.5(4) . . ?
C1 C6 N2 120.9(4) . . ?
C5 C6 N2 120.6(4) . . ?
N3 C7 C12 126.1(4) . . ?
N3 C7 C8 112.6(4) . . ?
C12 C7 C8 121.3(4) . . ?
C7 C8 C9 113.3(3) . . ?
C7 C8 H8A 108.9 . . ?
C9 C8 H8A 108.9 . . ?
C7 C8 H8B 108.9 . . ?
C9 C8 H8B 108.9 . . ?
H8A C8 H8B 107.7 . . ?
C10 C9 C13 111.0(4) . . ?
C10 C9 C8 106.9(4) . . ?
C13 C9 C8 110.5(4) . . ?
C10 C9 C14 110.0(3) . . ?
C13 C9 C14 108.5(4) . . ?
C8 C9 C14 109.9(3) . . ?
C11 C10 C9 114.0(3) . . ?
C11 C10 H10A 108.7 . . ?
C9 C10 H10A 108.7 . . ?
C11 C10 H10B 108.7 . . ?
C9 C10 H10B 108.7 . . ?
H10A C10 H10B 107.6 . . ?
O2 C11 C12 122.0(4) . . ?
O2 C11 C10 118.5(4) . . ?
C12 C11 C10 119.5(4) . . ?
C7 C12 C11 119.9(4) . . ?
C7 C12 C15 123.5(4) . . ?
C11 C12 C15 116.6(4) . . ?
C9 C13 H13A 109.5 . . ?
C9 C13 H13B 109.5 . . ?
H13A C13 H13B 109.5 . . ?
C9 C13 H13C 109.5 . . ?
H13A C13 H13C 109.5 . . ?
H13B C13 H13C 109.5 . . ?
C9 C14 H14A 109.5 . . ?
C9 C14 H14B 109.5 . . ?
H14A C14 H14B 109.5 . . ?
C9 C14 H14C 109.5 . . ?
H14A C14 H14C 109.5 . . ?
H14B C14 H14C 109.5 . . ?
N2 C15 C12 111.2(3) . . ?
N2 C15 C16 110.2(3) . . ?
C12 C15 C16 115.4(3) . . ?
N2 C15 H15 106.5 . . ?
C12 C15 H15 106.5 . . ?
C16 C15 H15 106.5 . . ?
C17 C16 C18 121.4(4) . . ?
C17 C16 C15 123.6(4) . . ?
C18 C16 C15 114.8(4) . . ?
C16 C17 C21 123.7(4) . . ?
C16 C17 H17 118.2 . . ?
C21 C17 H17 118.2 . . ?
C16 C18 C19 112.9(4) . . ?
C16 C18 H18A 109.0 . . ?
C19 C18 H18A 109.0 . . ?
C16 C18 H18B 109.0 . . ?
C19 C18 H18B 109.0 . . ?
H18A C18 H18B 107.8 . . ?
C20 C19 C18 109.9(4) . . ?
C20 C19 H19A 109.7 . . ?
C18 C19 H19A 109.7 . . ?
C20 C19 H19B 109.7 . . ?
C18 C19 H19B 109.7 . . ?
H19A C19 H19B 108.2 . . ?
C22 C20 C19 113.9(4) . . ?
C22 C20 C21 113.0(4) . . ?
C19 C20 C21 108.4(3) . . ?
C22 C20 H20 107.1 . . ?
C19 C20 H20 107.1 . . ?
C21 C20 H20 107.1 . . ?
C17 C21 C20 112.3(4) . . ?
C17 C21 H21A 109.1 . . ?
C20 C21 H21A 109.1 . . ?
C17 C21 H21B 109.1 . . ?
C20 C21 H21B 109.1 . . ?
H21A C21 H21B 107.9 . . ?
C23 C22 C24' 120.7(6) . . ?
C23 C22 C20 119.4(5) . . ?
C24' C22 C20 119.3(5) . . ?
C23 C22 C24 119.5(7) . . ?
C20 C22 C24 117.7(7) . . ?
C22 C23 H23A 120.0 . . ?
C22 C23 H23B 120.0 . . ?
H23A C23 H23B 120.0 . . ?
C30 C25 C26 119.7(4) . . ?
C30 C25 H25 120.2 . . ?
C26 C25 H25 120.2 . . ?
C27 C26 C25 119.6(4) . . ?
C27 C26 H26 120.2 . . ?
C25 C26 H26 120.2 . . ?
C26 C27 C28 121.1(4) . . ?
C26 C27 H27 119.4 . . ?
C28 C27 H27 119.4 . . ?
C27 C28 C29 119.6(4) . . ?
C27 C28 N5 116.8(4) . . ?
C29 C28 N5 123.6(4) . . ?
C28 C29 N4 120.5(4) . . ?
C28 C29 C30 118.4(4) . . ?
N4 C29 C30 121.1(4) . . ?
C25 C30 C29 121.6(4) . . ?
C25 C30 H30 119.2 . . ?
C29 C30 H30 119.2 . . ?
N5 C31 C36 126.2(4) . . ?
N5 C31 C32 112.9(4) . . ?
C36 C31 C32 120.9(4) . . ?
C31 C32 C33 113.9(3) . . ?
C31 C32 H31A 108.8 . . ?
C33 C32 H31A 108.8 . . ?
C31 C32 H32B 108.8 . . ?
C33 C32 H32B 108.8 . . ?
H31A C32 H32B 107.7 . . ?
C34 C33 C38 109.4(3) . . ?
C34 C33 C37 110.9(4) . . ?
C38 C33 C37 108.1(4) . . ?
C34 C33 C32 107.5(4) . . ?
C38 C33 C32 110.8(3) . . ?
C37 C33 C32 110.2(4) . . ?
C35 C34 C33 114.7(3) . . ?
C35 C34 H34A 108.6 . . ?
C33 C34 H34A 108.6 . . ?
C35 C34 H34B 108.6 . . ?
C33 C34 H34B 108.6 . . ?
H34A C34 H34B 107.6 . . ?
O1 C35 C36 122.0(4) . . ?
O1 C35 C34 118.0(4) . . ?
C36 C35 C34 120.0(4) . . ?
C31 C36 C35 120.1(4) . . ?
C31 C36 C39 123.3(4) . . ?
C35 C36 C39 116.5(4) . . ?
C33 C37 H37A 109.5 . . ?
C33 C37 H37B 109.5 . . ?
H37A C37 H37B 109.5 . . ?
C33 C37 H37C 109.5 . . ?
H37A C37 H37C 109.5 . . ?
H37B C37 H37C 109.5 . . ?
C33 C38 H38A 109.5 . . ?
C33 C38 H38B 109.5 . . ?
H38A C38 H38B 109.5 . . ?
C33 C38 H38C 109.5 . . ?
H38A C38 H38C 109.5 . . ?
H38B C38 H38C 109.5 . . ?
N4 C39 C36 110.5(3) . . ?
N4 C39 C40 110.7(3) . . ?
C36 C39 C40 115.2(3) . . ?
N4 C39 H39 106.6 . . ?
C36 C39 H39 106.6 . . ?
C40 C39 H39 106.6 . . ?
C41 C40 C42 121.0(4) . . ?
C41 C40 C39 124.1(4) . . ?
C42 C40 C39 114.7(4) . . ?
C40 C41 C44 124.6(4) . . ?
C40 C41 H41 117.7 . . ?
C44 C41 H41 117.7 . . ?
C40 C42 C43 113.1(3) . . ?
C40 C42 H42A 109.0 . . ?
C43 C42 H42A 109.0 . . ?
C40 C42 H42B 109.0 . . ?
C43 C42 H42B 109.0 . . ?
H42A C42 H42B 107.8 . . ?
C42 C43 C45 110.6(3) . . ?
C42 C43 H43A 109.5 . . ?
C45 C43 H43A 109.5 . . ?
C42 C43 H43B 109.5 . . ?
C45 C43 H43B 109.5 . . ?
H43A C43 H43B 108.1 . . ?
C41 C44 C45 113.2(4) . . ?
C41 C44 H44A 108.9 . . ?
C45 C44 H44A 108.9 . . ?
C41 C44 H44B 108.9 . . ?
C45 C44 H44B 108.9 . . ?
H44A C44 H44B 107.7 . . ?
C44 C45 C46 110.9(4) . . ?
C44 C45 C43 109.5(3) . . ?
C46 C45 C43 113.2(4) . . ?
C44 C45 H45 107.7 . . ?
C46 C45 H45 107.7 . . ?
C43 C45 H45 107.7 . . ?
C48 C46 C47 125.5(7) . . ?
C47 C46 C48' 109.1(7) . . ?
C48 C46 C45 112.7(7) . . ?
C47 C46 C45 120.4(5) . . ?
C48' C46 C45 120.1(7) . . ?
C46 C47 H47A 120.0 . . ?
C46 C47 H47B 120.0 . . ?
H47A C47 H47B 120.0 . . ?
C46 C48 H48A 109.5 . . ?
C46 C48 H48B 109.5 . . ?
H48A C48 H48B 109.5 . . ?
C46 C48 H48C 109.5 . . ?
H48A C48 H48C 109.5 . . ?
H48B C48 H48C 109.5 . . ?
C46 C48' H48D 109.5 . . ?
C46 C48' H48E 109.5 . . ?
H48D C48' H48E 109.5 . . ?
C46 C48' H48F 109.5 . . ?
H48D C48' H48F 109.5 . . ?
H48E C48' H48F 109.5 . . ?
C6 N2 C15 115.7(3) . . ?
C6 N2 H2N 114(3) . . ?
C15 N2 H2N 111(3) . . ?
C7 N3 C5 133.2(4) . . ?
C7 N3 H3N 111(3) . . ?
C5 N3 H3N 116(3) . . ?
C29 N4 C39 114.2(3) . . ?
C29 N4 H4N 108(3) . . ?
C39 N4 H4N 113(3) . . ?
C31 N5 C28 133.3(4) . . ?
C31 N5 H5N 116(3) . . ?
C28 N5 H5N 111(3) . . ?
C22 C24 H24A 109.5 . . ?
C22 C24 H24B 109.5 . . ?
H24A C24 H24B 109.5 . . ?
C22 C24 H24C 109.5 . . ?
H24A C24 H24C 109.5 . . ?
H24B C24 H24C 109.5 . . ?
C22 C24' H24D 109.5 . . ?
C22 C24' H24E 109.5 . . ?
H24D C24' H24E 109.5 . . ?
C22 C24' H24F 109.5 . . ?
H24D C24' H24F 109.5 . . ?
H24E C24' H24F 109.5 . . ?
 
loop_
 _geom_torsion_atom_site_label_1
 _geom_torsion_atom_site_label_2
 _geom_torsion_atom_site_label_3
 _geom_torsion_atom_site_label_4
 _geom_torsion
 _geom_torsion_site_symmetry_1
 _geom_torsion_site_symmetry_2
 _geom_torsion_site_symmetry_3
 _geom_torsion_site_symmetry_4
 _geom_torsion_publ_flag
C6 C1 C2 C3 0.4(7) . . . . ?
C1 C2 C3 C4 -0.7(7) . . . . ?
C2 C3 C4 C5 1.3(7) . . . . ?
C3 C4 C5 C6 -1.5(6) . . . . ?
C3 C4 C5 N3 -178.0(4) . . . . ?
C2 C1 C6 C5 -0.6(7) . . . . ?
C2 C1 C6 N2 179.1(4) . . . . ?
C4 C5 C6 C1 1.2(6) . . . . ?
N3 C5 C6 C1 177.4(4) . . . . ?
C4 C5 C6 N2 -178.6(4) . . . . ?
N3 C5 C6 N2 -2.4(6) . . . . ?
N3 C7 C8 C9 -152.5(4) . . . . ?
C12 C7 C8 C9 28.2(5) . . . . ?
C7 C8 C9 C10 -53.2(4) . . . . ?
C7 C8 C9 C13 67.6(5) . . . . ?
C7 C8 C9 C14 -172.6(3) . . . . ?
C13 C9 C10 C11 -67.9(5) . . . . ?
C8 C9 C10 C11 52.7(5) . . . . ?
C14 C9 C10 C11 172.0(4) . . . . ?
C9 C10 C11 O2 155.1(4) . . . . ?
C9 C10 C11 C12 -26.7(6) . . . . ?
N3 C7 C12 C11 -177.8(4) . . . . ?
C8 C7 C12 C11 1.3(6) . . . . ?
N3 C7 C12 C15 1.7(6) . . . . ?
C8 C7 C12 C15 -179.2(4) . . . . ?
O2 C11 C12 C7 175.9(4) . . . . ?
C10 C11 C12 C7 -2.2(6) . . . . ?
O2 C11 C12 C15 -3.6(6) . . . . ?
C10 C11 C12 C15 178.2(4) . . . . ?
C7 C12 C15 N2 -47.3(5) . . . . ?
C11 C12 C15 N2 132.2(4) . . . . ?
C7 C12 C15 C16 79.2(5) . . . . ?
C11 C12 C15 C16 -101.3(4) . . . . ?
N2 C15 C16 C17 111.3(5) . . . . ?
C12 C15 C16 C17 -15.7(6) . . . . ?
N2 C15 C16 C18 -64.6(5) . . . . ?
C12 C15 C16 C18 168.4(4) . . . . ?
C18 C16 C17 C21 4.1(7) . . . . ?
C15 C16 C17 C21 -171.5(4) . . . . ?
C17 C16 C18 C19 11.7(6) . . . . ?
C15 C16 C18 C19 -172.3(4) . . . . ?
C16 C18 C19 C20 -45.9(5) . . . . ?
C18 C19 C20 C22 -168.9(4) . . . . ?
C18 C19 C20 C21 64.5(5) . . . . ?
C16 C17 C21 C20 15.1(7) . . . . ?
C22 C20 C21 C17 -175.5(4) . . . . ?
C19 C20 C21 C17 -48.4(5) . . . . ?
C19 C20 C22 C23 110.4(6) . . . . ?
C21 C20 C22 C23 -125.5(6) . . . . ?
C19 C20 C22 C24' -78.9(7) . . . . ?
C21 C20 C22 C24' 45.3(8) . . . . ?
C19 C20 C22 C24 -48.9(9) . . . . ?
C21 C20 C22 C24 75.3(9) . . . . ?
C30 C25 C26 C27 -1.0(7) . . . . ?
C25 C26 C27 C28 0.5(7) . . . . ?
C26 C27 C28 C29 0.4(6) . . . . ?
C26 C27 C28 N5 178.2(4) . . . . ?
C27 C28 C29 N4 178.1(4) . . . . ?
N5 C28 C29 N4 0.4(7) . . . . ?
C27 C28 C29 C30 -0.7(6) . . . . ?
N5 C28 C29 C30 -178.4(4) . . . . ?
C26 C25 C30 C29 0.6(7) . . . . ?
C28 C29 C30 C25 0.2(7) . . . . ?
N4 C29 C30 C25 -178.5(4) . . . . ?
N5 C31 C32 C33 152.1(4) . . . . ?
C36 C31 C32 C33 -28.9(6) . . . . ?
C31 C32 C33 C34 52.0(5) . . . . ?
C31 C32 C33 C38 171.4(4) . . . . ?
C31 C32 C33 C37 -69.0(5) . . . . ?
C38 C33 C34 C35 -169.8(4) . . . . ?
C37 C33 C34 C35 71.1(5) . . . . ?
C32 C33 C34 C35 -49.5(5) . . . . ?
C33 C34 C35 O1 -157.0(4) . . . . ?
C33 C34 C35 C36 23.7(6) . . . . ?
N5 C31 C36 C35 178.3(4) . . . . ?
C32 C31 C36 C35 -0.6(6) . . . . ?
N5 C31 C36 C39 1.4(7) . . . . ?
C32 C31 C36 C39 -177.5(4) . . . . ?
O1 C35 C36 C31 -175.9(4) . . . . ?
C34 C35 C36 C31 3.4(6) . . . . ?
O1 C35 C36 C39 1.1(6) . . . . ?
C34 C35 C36 C39 -179.6(4) . . . . ?
C31 C36 C39 N4 44.6(5) . . . . ?
C35 C36 C39 N4 -132.4(4) . . . . ?
C31 C36 C39 C40 -81.8(5) . . . . ?
C35 C36 C39 C40 101.3(4) . . . . ?
N4 C39 C40 C41 -112.0(4) . . . . ?
C36 C39 C40 C41 14.3(6) . . . . ?
N4 C39 C40 C42 64.8(5) . . . . ?
C36 C39 C40 C42 -168.9(4) . . . . ?
C42 C40 C41 C44 0.0(7) . . . . ?
C39 C40 C41 C44 176.6(4) . . . . ?
C41 C40 C42 C43 17.8(6) . . . . ?
C39 C40 C42 C43 -159.1(4) . . . . ?
C40 C42 C43 C45 -48.0(5) . . . . ?
C40 C41 C44 C45 13.2(6) . . . . ?
C41 C44 C45 C46 -168.2(4) . . . . ?
C41 C44 C45 C43 -42.6(5) . . . . ?
C42 C43 C45 C44 60.6(5) . . . . ?
C42 C43 C45 C46 -175.1(4) . . . . ?
C44 C45 C46 C48 -109.8(7) . . . . ?
C43 C45 C46 C48 126.7(7) . . . . ?
C44 C45 C46 C47 83.0(6) . . . . ?
C43 C45 C46 C47 -40.5(7) . . . . ?
C44 C45 C46 C48' -58.2(9) . . . . ?
C43 C45 C46 C48' 178.3(8) . . . . ?
C1 C6 N2 C15 124.6(4) . . . . ?
C5 C6 N2 C15 -55.6(5) . . . . ?
C12 C15 N2 C6 84.6(4) . . . . ?
C16 C15 N2 C6 -44.6(5) . . . . ?
C12 C7 N3 C5 2.5(7) . . . . ?
C8 C7 N3 C5 -176.7(4) . . . . ?
C6 C5 N3 C7 21.2(7) . . . . ?
C4 C5 N3 C7 -162.5(4) . . . . ?
C28 C29 N4 C39 59.8(5) . . . . ?
C30 C29 N4 C39 -121.5(4) . . . . ?
C36 C39 N4 C29 -86.2(4) . . . . ?
C40 C39 N4 C29 42.7(5) . . . . ?
C36 C31 N5 C28 -2.8(7) . . . . ?
C32 C31 N5 C28 176.2(4) . . . . ?
C27 C28 N5 C31 160.0(4) . . . . ?
C29 C28 N5 C31 -22.3(7) . . . . ?
 
loop_
 _geom_hbond_atom_site_label_D 
 _geom_hbond_atom_site_label_H 
 _geom_hbond_atom_site_label_A 
 _geom_hbond_distance_DH 
 _geom_hbond_distance_HA 
 _geom_hbond_distance_DA 
 _geom_hbond_angle_DHA 
 _geom_hbond_site_symmetry_A 
 _geom_hbond_publ_flag
N3 H3N O2  0.880(14) 2.23(2) 3.069(5) 158(4) 4 yes
N2 H2N O1  0.883(14) 2.199(19) 3.063(5) 166(4) 4_645 yes
N5 H5N O1  0.881(14) 2.123(17) 2.995(5) 170(4) 4_645 yes
N4 H4N O2  0.887(14) 2.21(2) 3.059(5) 160(4) 4_655 yes
 
_refine_diff_density_max    0.273
_refine_diff_density_min   -0.279
_refine_diff_density_rms    0.062

_shelx_res_file
;

TITL FPD8_17_034 in I2
    FPD8_17_034.res
    created by SHELXL-2018/3 at 13:55:43 on 23-Oct-2018
CELL  0.71073  11.6743  14.0675  25.6604   90.000   94.342   90.000
ZERR    4.000   0.0015   0.0018   0.0039    0.000    0.003    0.000
LATT -2
SYMM -X, Y, -Z

SFAC C     H     N    O
UNIT 192 240 16 8

LIST 4 ! automatically inserted. Change 6 to 4 for CHECKCIF!!

L.S. 18
BOND $H

FMAP 2
PLAN -5

ACTA
CONF
WPDB
BOND $H

EQIV $1 -x+1/2, y+1/2, -z+1/2
EQIV $2 -x+3/2, y-1/2, -z+1/2
EQIV $3 -x+3/2, y+1/2, -z+1/2

HTAB N3 O2_$1
HTAB N2 O1_$2
HTAB N5 O1_$2
HTAB N4 O2_$3

TEMP -123.140
SHEL 5.8 0.83
SIZE 0.26 0.24 0.09
REM Colourless Plate

HTAB

DFIX 0.88 0.01 N2 H2N N3 H3N N4 H4N N5 H5N

WGHT    0.040600    4.062700
FVAR       0.19992
C1    1    0.546195    0.697911    0.383414    11.00000    0.02548    0.02462 =
         0.04231    0.00464   -0.00060   -0.00096
AFIX  43
H1    2    0.609295    0.655088    0.385279    11.00000   -1.20000
AFIX   0
C2    1    0.537672    0.762938    0.423510    11.00000    0.03225    0.03367 =
         0.04468    0.00188   -0.01130   -0.00491
AFIX  43
H2    2    0.594163    0.764825    0.452155    11.00000   -1.20000
AFIX   0
C3    1    0.445417    0.825148    0.421136    11.00000    0.03976    0.02881 =
         0.03363   -0.00376   -0.00494   -0.00883
AFIX  43
H3    2    0.437639    0.869758    0.448437    11.00000   -1.20000
AFIX   0
C4    1    0.364012    0.821992    0.378484    11.00000    0.02468    0.02669 =
         0.03060   -0.00186    0.00077   -0.00063
AFIX  43
H4    2    0.301706    0.865604    0.376633    11.00000   -1.20000
AFIX   0
C5    1    0.372715    0.755463    0.338306    11.00000    0.02330    0.01793 =
         0.02471    0.00179    0.00144   -0.00435
C6    1    0.466142    0.692861    0.340606    11.00000    0.02152    0.02134 =
         0.02879    0.00411    0.00465   -0.00442
C7    1    0.250769    0.698407    0.257061    11.00000    0.01924    0.02131 =
         0.02080    0.00104    0.00821   -0.00066
C8    1    0.159475    0.740509    0.218687    11.00000    0.02340    0.02303 =
         0.02496    0.00035    0.00138    0.00573
AFIX  23
H8A   2    0.197512    0.775592    0.191347    11.00000   -1.20000
H8B   2    0.113350    0.786709    0.237326    11.00000   -1.20000
AFIX   0
C9    1    0.078958    0.665891    0.192482    11.00000    0.02697    0.01911 =
         0.02877   -0.00357    0.00048    0.00231
C10   1    0.154538    0.591349    0.168891    11.00000    0.03183    0.03229 =
         0.02583   -0.00742    0.00013    0.00507
AFIX  23
H10A  2    0.105202    0.538636    0.154845    11.00000   -1.20000
H10B  2    0.191476    0.620261    0.139237    11.00000   -1.20000
AFIX   0
C11   1    0.246961    0.550970    0.207078    11.00000    0.02458    0.02260 =
         0.02813   -0.00302    0.00881    0.00341
C12   1    0.290505    0.607545    0.251141    11.00000    0.02172    0.02318 =
         0.02128    0.00061    0.00409    0.00429
C13   1    0.004573    0.621084    0.232385    11.00000    0.02819    0.03496 =
         0.04185    0.00175    0.00881    0.00036
AFIX 137
H13A  2   -0.038557    0.670955    0.249017    11.00000   -1.50000
H13B  2    0.053775    0.587602    0.259049    11.00000   -1.50000
H13C  2   -0.049210    0.575954    0.214684    11.00000   -1.50000
AFIX   0
C14   1   -0.000386    0.712503    0.149192    11.00000    0.03577    0.02828 =
         0.03590   -0.00153   -0.01041   -0.00098
AFIX 137
H14A  2   -0.044986    0.763187    0.164303    11.00000   -1.50000
H14B  2   -0.052796    0.664594    0.133123    11.00000   -1.50000
H14C  2    0.046075    0.739423    0.122570    11.00000   -1.50000
AFIX   0
C15   1    0.379438    0.562022    0.288247    11.00000    0.02447    0.02051 =
         0.02545    0.00034    0.00703    0.00185
AFIX  13
H15   2    0.409588    0.506037    0.269547    11.00000   -1.20000
AFIX   0
C16   1    0.335856    0.524114    0.338532    11.00000    0.02514    0.01691 =
         0.02755   -0.00255    0.00203   -0.00116
C17   1    0.234331    0.547874    0.355698    11.00000    0.03128    0.02604 =
         0.02904    0.00156    0.00380    0.00113
AFIX  43
H17   2    0.182433    0.583694    0.333157    11.00000   -1.20000
AFIX   0
C18   1    0.419873    0.461776    0.370474    11.00000    0.03701    0.02950 =
         0.02951    0.00575    0.00543    0.00394
AFIX  23
H18A  2    0.486408    0.500746    0.383766    11.00000   -1.20000
H18B  2    0.448558    0.411795    0.347621    11.00000   -1.20000
AFIX   0
C19   1    0.366933    0.414627    0.416663    11.00000    0.03978    0.03148 =
         0.03264    0.00929    0.00260    0.00145
AFIX  23
H19A  2    0.315741    0.362123    0.403915    11.00000   -1.20000
H19B  2    0.428483    0.387575    0.440894    11.00000   -1.20000
AFIX   0
C20   1    0.298527    0.487585    0.445400    11.00000    0.04384    0.03855 =
         0.02824   -0.00190    0.00538   -0.01026
AFIX  13
H20   2    0.349816    0.543715    0.452686    11.00000   -1.20000
AFIX   0
C21   1    0.197878    0.521110    0.408550    11.00000    0.03532    0.03899 =
         0.03606    0.00175    0.01215    0.00141
AFIX  23
H21A  2    0.139847    0.469795    0.404538    11.00000   -1.20000
H21B  2    0.161424    0.576741    0.424172    11.00000   -1.20000
AFIX   0
C22   1    0.261915    0.453124    0.497356    11.00000    0.05492    0.04863 =
         0.02978    0.00082    0.01050   -0.01314
C23   1    0.309931    0.490852    0.541347    11.00000    0.10072    0.10340 =
         0.02771   -0.00227    0.01024   -0.03735
AFIX  93
H23A  2    0.279748    0.476753    0.573825    11.00000   -1.20000
H23B  2    0.374358    0.531859    0.540244    11.00000   -1.20000
AFIX   0

C25   1    1.030156    0.739045    0.428174    11.00000    0.03674    0.03341 =
         0.03372    0.00145   -0.00999    0.00459
AFIX  43
H25   2    1.082939    0.738421    0.458226    11.00000   -1.20000
AFIX   0
C26   1    0.940387    0.674289    0.423591    11.00000    0.03383    0.03210 =
         0.03079    0.00713   -0.00272    0.00064
AFIX  43
H26   2    0.932042    0.628438    0.450220    11.00000   -1.20000
AFIX   0
C27   1    0.862905    0.676865    0.379921    11.00000    0.02573    0.01922 =
         0.02857   -0.00015    0.00426    0.00134
AFIX  43
H27   2    0.801136    0.632753    0.377006    11.00000   -1.20000
AFIX   0
C28   1    0.874110    0.743200    0.340144    11.00000    0.02012    0.02412 =
         0.02320   -0.00186    0.00407    0.00190
C29   1    0.965399    0.807928    0.344198    11.00000    0.02189    0.02102 =
         0.02959   -0.00431    0.00376    0.00053
C30   1    1.042459    0.804432    0.388852    11.00000    0.02232    0.03481 =
         0.03861   -0.00575   -0.00473   -0.00175
AFIX  43
H30   2    1.104633    0.848128    0.392115    11.00000   -1.20000
AFIX   0
C31   1    0.756513    0.801293    0.258319    11.00000    0.02088    0.02249 =
         0.02143   -0.00056    0.00376    0.00349
C32   1    0.670694    0.758760    0.217408    11.00000    0.02977    0.01432 =
         0.02499    0.00056   -0.00007   -0.00015
AFIX  23
H31A  2    0.625621    0.709263    0.234133    11.00000   -1.20000
H32B  2    0.713292    0.727394    0.190251    11.00000   -1.20000
AFIX   0

C33   1    0.587418    0.831731    0.190983    11.00000    0.02702    0.02017 =
         0.02682    0.00130   -0.00078   -0.00202
C34   1    0.659498    0.913003    0.171194    11.00000    0.03782    0.02232 =
         0.03110    0.00720   -0.00330   -0.00245
AFIX  23
H34A  2    0.698546    0.890198    0.140626    11.00000   -1.20000
H34B  2    0.607323    0.965307    0.159098    11.00000   -1.20000
AFIX   0
C35   1    0.749245    0.952297    0.211198    11.00000    0.02380    0.01986 =
         0.02659    0.00037    0.00592    0.00122
C36   1    0.792315    0.894276    0.254555    11.00000    0.02630    0.01975 =
         0.02196    0.00039    0.00828    0.00115
C37   1    0.504449    0.868318    0.230036    11.00000    0.02888    0.02850 =
         0.04627   -0.00267   -0.00223    0.00026
AFIX 137
H37A  2    0.459169    0.815142    0.242143    11.00000   -1.50000
H37B  2    0.452836    0.915744    0.212951    11.00000   -1.50000
H37C  2    0.548352    0.897435    0.259958    11.00000   -1.50000
AFIX   0
C38   1    0.516057    0.786844    0.144766    11.00000    0.04372    0.02118 =
         0.04281    0.00509   -0.01432   -0.00178
AFIX 137
H38A  2    0.469861    0.734686    0.157379    11.00000   -1.50000
H38B  2    0.567501    0.762162    0.119504    11.00000   -1.50000
H38C  2    0.465186    0.834985    0.127866    11.00000   -1.50000
AFIX   0
C39   1    0.880681    0.939152    0.292687    11.00000    0.02422    0.01984 =
         0.02561    0.00075    0.00257   -0.00751
AFIX  13
H39   2    0.911069    0.995981    0.274811    11.00000   -1.20000
AFIX   0
C40   1    0.835258    0.974740    0.343255    11.00000    0.02856    0.01685 =
         0.02168   -0.00120    0.00250   -0.00231
C41   1    0.734468    0.951816    0.359142    11.00000    0.02402    0.02221 =
         0.02762   -0.00363    0.00216   -0.00076
AFIX  43
H41   2    0.685458    0.913258    0.336730    11.00000   -1.20000
AFIX   0
C42   1    0.918293    1.035758    0.376518    11.00000    0.02748    0.02499 =
         0.03179   -0.00446   -0.00134   -0.00711
AFIX  23
H42A  2    0.917148    1.101008    0.362035    11.00000   -1.20000
H42B  2    0.996913    1.010216    0.374714    11.00000   -1.20000
AFIX   0
C43   1    0.890492    1.040161    0.433608    11.00000    0.03122    0.04107 =
         0.03279   -0.01034   -0.00191    0.00053
AFIX  23
H43A  2    0.937271    1.090449    0.451895    11.00000   -1.20000
H43B  2    0.910234    0.978732    0.450846    11.00000   -1.20000
AFIX   0
C44   1    0.690938    0.982516    0.410642    11.00000    0.03253    0.03123 =
         0.02924   -0.00327    0.00891    0.00215
AFIX  23
H44A  2    0.690739    0.926836    0.434230    11.00000   -1.20000
H44B  2    0.610667    1.004858    0.404355    11.00000   -1.20000
AFIX   0
C45   1    0.762733    1.061303    0.437616    11.00000    0.03326    0.03792 =
         0.03345   -0.01259   -0.00076    0.00424
AFIX  13
H45   2    0.744479    1.121768    0.418243    11.00000   -1.20000
AFIX   0
C46   1    0.731093    1.075076    0.493800    11.00000    0.04276    0.07731 =
         0.04383   -0.03106   -0.00034    0.01677
C47   1    0.779129    1.016689    0.533798    11.00000    0.08579    0.08863 =
         0.03570    0.00586    0.02098    0.02487
AFIX  93
H47A  2    0.773740    1.034134    0.569294    11.00000   -1.20000
H47B  2    0.817153    0.959577    0.525475    11.00000   -1.20000
AFIX   0

PART 3
C48   1    0.673622    1.159886    0.500832    10.60000    0.07860
AFIX 137
H48A  2    0.710824    1.211093    0.482475    10.60000   -1.50000
H48B  2    0.675898    1.174756    0.538208    10.60000   -1.50000
H48C  2    0.593545    1.153722    0.486783    10.60000   -1.50000
AFIX   0

PART 4
C48'  1    0.613041    1.098448    0.504325    10.40000    0.06449
AFIX  33
H48D  2    0.578956    1.139380    0.476394    10.40000   -1.50000
H48E  2    0.568050    1.039823    0.505787    10.40000   -1.50000
H48F  2    0.612973    1.131809    0.537849    10.40000   -1.50000
AFIX   0
PART 0

N2    3    0.478656    0.626603    0.300248    11.00000    0.01782    0.02767 =
         0.03095    0.00071    0.00500    0.00183
H2N   2    0.543564    0.594155    0.303437    11.00000   -1.50000
N3    3    0.286801    0.760561    0.295690    11.00000    0.01949    0.01929 =
         0.02338    0.00010    0.00051    0.00235
H3N   2    0.249514    0.814799    0.292069    11.00000   -1.50000
N4    3    0.980284    0.873234    0.303990    11.00000    0.01967    0.02412 =
         0.03266   -0.00186    0.00613   -0.00702
H4N   2    1.045803    0.903850    0.311720    11.00000   -1.50000
N5    3    0.792275    0.738176    0.296362    11.00000    0.02407    0.01599 =
         0.02617    0.00193    0.00251   -0.00230
H5N   2    0.763513    0.680428    0.292986    11.00000   -1.50000
O1    4    0.784442    1.034996    0.204909    11.00000    0.03094    0.01753 =
         0.03949    0.00746    0.00305   -0.00329
O2    4    0.285474    0.469817    0.198587    11.00000    0.03067    0.02473 =
         0.04354   -0.00969    0.00341    0.00650
PART 1
C24   1    0.204391    0.355629    0.498922    10.40000    0.05528
AFIX 137
H24A  2    0.253128    0.307997    0.483635    10.40000   -1.50000
H24B  2    0.129566    0.357858    0.478885    10.40000   -1.50000
H24C  2    0.193609    0.338541    0.535251    10.40000   -1.50000
AFIX   0

PART 2
C24'  1    0.159498    0.387831    0.498444    10.60000    0.06666
AFIX 137
H24D  2    0.089411    0.422852    0.487138    10.60000   -1.50000
H24E  2    0.153846    0.364163    0.534077    10.60000   -1.50000
H24F  2    0.168752    0.334094    0.474824    10.60000   -1.50000

PART 4

AFIX   0
HKLF 4


REM  FPD8_17_034 in I2
REM wR2 = 0.1208, GooF = S = 1.124, Restrained GooF = 1.124 for all data
REM R1 = 0.0525 for 6365 Fo > 4sig(Fo) and 0.0681 for all 7592 data
REM 504 parameters refined using 5 restraints

END

WGHT      0.0390      4.1491

REM Instructions for potential hydrogen bonds
HTAB C4 O2_$1
EQIV $4 x-1, y, z
HTAB C8 N4_$4
HTAB C27 O1_$2
HTAB N2 O1_$2
HTAB N3 O2_$1
HTAB N4 O2_$3
HTAB N5 O1_$2

REM Highest difference peak  0.273,  deepest hole -0.279,  1-sigma level  0.062
Q1    1   0.7428  0.9231  0.2437  11.00000  0.05    0.27
Q2    1   0.3601  0.5566  0.3158  11.00000  0.05    0.27
Q3    1   0.3363  0.4259  0.5344  11.00000  0.05    0.26
Q4    1   0.2358  0.5744  0.2465  11.00000  0.05    0.26
Q5    1   0.4513  0.7481  0.3314  11.00000  0.05    0.23
;
_shelx_res_checksum   74759

_shelx_hkl_file
;
   0   0   4    3.20    0.40
   0   0  -4    3.50    0.50
   0   0   4    2.80    0.50
   0   0  -4    3.00    0.40
   0   0   4    3.10    0.40
   0   0  -4    2.70    0.40
   0   0  -4    3.30    0.70
   0   0   4    3.50    0.50
   0   0   6   20.00    1.00
   0   0  -6   20.00    1.00
   0   0   6   20.00    1.00
   0   0  -6   20.90    1.30
   0   0   6   19.30    0.90
   0   0  -6   19.90    0.90
   0   0   6   19.40    0.80
   0   0  -6   19.30    0.90
   0   0  -8   62.29    2.20
   0   0  -8   59.39    2.10
   0   0   8   62.69    2.10
   0   0  -8   64.69    2.10
   0   0   8   62.79    2.20
   0   0   8   64.99    2.10
   0   0  -8   64.29    2.50
   0   0  10   36.50    1.50
   0   0  10   34.50    1.30
   0   0 -10   36.40    1.40
   0   0  10   37.00    1.60
   0   0 -10   36.00    1.50
   0   0 -10   36.90    1.90
   0   0 -10   34.30    1.40
   0   0 -12    5.40    1.50
   0   0  12    7.30    0.90
   0   0  12    5.80    1.20
   0   0 -12    6.80    1.00
   0   0 -14  521.05   16.40
   0   0  14  508.25   15.80
   0   0  14  499.65   15.90
   0   0 -14  527.45   15.80
   0   0  16    6.70    0.70
   0   0  16    6.90    0.90
   0   0 -16    7.10    1.80
   0   0 -16    7.20    0.80
   0   0  18   11.70    1.10
   0   0 -18   12.10    0.90
   0   0  18   10.80    0.90
   0   0 -18   10.90    2.40
   0   0 -20  143.59    5.60
   0   0  20  139.19    4.80
   0   0  20  137.29    4.90
   0   0 -20  142.99    4.70
   0   0  22  185.28    6.20
   0   0 -22  187.48    6.10
   0   0  22  177.98    6.30
   0   0 -22  189.38    7.00
   0   0  24  204.58    7.00
   0   0 -24  204.68    7.60
   0   0 -24  202.68    6.70
   0   0  24  200.38    7.00
   0   0  26   21.00    1.50
   0   0  26   21.90    1.70
   0   0 -26   23.20    1.50
   0   0  28    1.50    0.80
   0   0  28    1.70    0.80
   0   0 -28    0.70    0.90
   0   0 -30    1.20    1.00
   0   0  30    1.90    1.00
   0  -1   3  617.44   18.80
   0  -1  -3  638.44   18.80
   0  -1  -3  633.44   18.80
   0  -1   3  614.94   18.80
   0  -1  -3  607.34   18.80
   0   1   3  641.04   18.70
   0   1   3  610.94   18.60
   0   1  -3  604.74   18.60
   0   1   3  623.14   18.60
   0   1  -3  594.94   18.50
   0  -1  -5  442.96   13.40
   0  -1  -5  460.15   13.50
   0  -1  -5  444.36   13.40
   0  -1   5  440.06   13.50
   0  -1  -5  451.95   13.60
   0  -1   5  425.06   13.40
   0  -1   5  436.16   13.50
   0   1  -5  452.25   13.40
   0   1  -5  424.46   13.30
   0   1   5  432.76   13.40
   0   1   5  430.46   13.30
   0   1  -5  439.36   13.40
   0   1   5  468.55   13.60
   0   1   5  435.76   13.40
   0  -1  -7  187.38    5.90
   0  -1  -7  185.98    5.90
   0  -1  -7  194.28    6.20
   0  -1   7  186.68    5.90
   0  -1   7  193.38    5.90
   0  -1  -7  191.18    5.80
   0  -1   7  184.68    5.80
   0   1   7  189.58    5.90
   0   1  -7  192.68    6.00
   0   1   7  189.98    5.90
   0   1   7  191.68    5.80
   0   1  -7  182.68    5.90
   0   1  -7  188.38    5.80
   0   1   7  192.98    6.10
   0  -1  -9   35.70    1.50
   0  -1  -9   34.00    1.40
   0  -1  -9   36.50    1.80
   0  -1   9   35.20    1.40
   0  -1   9   33.30    1.30
   0  -1  -9   35.70    1.30
   0  -1   9   36.50    1.40
   0   1   9   34.40    1.40
   0   1  -9   33.40    1.30
   0   1  -9   36.20    1.30
   0   1   9   34.80    1.30
   0   1  -9   35.30    1.50
   0   1  -9   35.30    1.70
   0   1   9   36.50    1.70
   0   1   9   34.20    1.40
   0  -1 -11    5.90    0.90
   0  -1 -11    4.80    1.30
   0   1 -11    4.00    1.20
   0   1  11    5.70    0.90
   0   1  11    6.10    0.70
   0  -1  13   35.00    1.70
   0  -1  13   36.00    1.50
   0  -1 -13   35.30    1.50
   0  -1 -13   37.30    2.10
   0   1 -13   35.80    2.20
   0   1  13   34.40    1.50
   0   1  13   34.30    1.60
   0   1  13   33.50    1.70
   0   1 -13   36.80    1.50
   0  -1  15   10.60    0.80
   0  -1 -15    9.30    0.80
   0  -1  15    9.40    1.00
   0  -1 -15    8.80    1.40
   0   1 -15    8.50    1.70
   0   1 -15   10.30    0.90
   0   1  15    9.90    1.00
   0   1  15    9.50    0.70
   0  -1  17   23.50    1.30
   0  -1 -17   24.00    2.10
   0  -1 -17   21.10    1.20
   0  -1  17   22.10    1.10
   0   1  17   23.10    1.30
   0   1 -17   22.90    1.20
   0   1 -17   23.00    2.30
   0   1  17   21.40    1.10
   0  -1  19   13.00    1.00
   0  -1  19   14.20    1.20
   0  -1 -19   14.10    1.10
   0  -1 -19   20.20    4.10
   0   1  19   14.20    1.30
   0   1  19   13.50    1.00
   0   1 -19   15.80    1.10
   0   1 -19   17.30    2.10
   0  -1  21   55.79    2.30
   0  -1 -21   53.49    3.10
   0  -1 -21   53.29    2.30
   0  -1  21   55.19    2.50
   0   1 -21   55.39    2.30
   0   1  21   54.89    2.30
   0   1  21   53.39    2.40
   0   1 -21   57.69    3.30
   0  -1 -23  113.59    4.30
   0  -1 -23  109.59    4.70
   0   1  23  110.79    4.30
   0   1 -23  111.19    5.00
   0  -1 -25  158.98    5.40
   0  -1  25  153.78    5.60
   0  -1  25  156.18    5.50
   0  -1 -25  161.98    6.30
   0   1 -25  158.18    5.30
   0   1  25  155.78    5.40
   0   1 -25  154.48    6.40
   0   1  25  152.78    5.50
   0  -1 -27   29.40    1.90
   0  -1  27   32.90    1.80
   0  -1  27   29.10    2.00
   0   1 -27   28.20    1.80
   0   1  27   30.40    2.00
   0   1  27   29.30    1.80
   0  -1  29    3.10    0.90
   0  -1  29    1.80    1.00
   0  -1 -29    2.50    1.00
   0   1  29    1.40    0.90
   0   1  29    3.10    1.00
   0   1 -29   -0.80    1.00
   0  -2   0  139.59    4.50
   0  -2   0  154.38    4.50
   0   2   0  155.28    4.80
   0   2   0  156.98    4.80
   0  -2  -2  518.05   15.60
   0  -2   2  500.05   15.50
   0  -2  -2  503.85   15.50
   0  -2   2  520.45   15.60
   0  -2   2  521.35   15.60
   0  -2  -2  526.05   15.60
   0   2   2  509.15   15.40
   0   2   2  517.45   15.40
   0   2  -2  478.45   15.40
   0   2  -2  509.35   15.40
   0   2   2  507.75   15.40
   0   2  -2  529.75   15.40
   0  -2   4   90.69    3.00
   0  -2  -4   90.49    2.90
   0  -2  -4   91.49    2.90
   0  -2  -4   91.39    2.90
   0  -2   4   86.59    2.80
   0  -2   4   90.99    2.90
   0   2   4   95.89    2.90
   0   2  -4   89.39    3.00
   0   2  -4   88.49    2.90
   0   2  -4   90.09    2.90
   0   2   4   88.39    2.90
   0   2   4   88.99    2.90
   0   2   4   93.39    3.10
   0  -2  -6   20.20    0.90
   0  -2   6   21.90    0.90
   0  -2  -6   20.10    0.90
   0  -2   6   19.20    0.80
   0  -2  -6   21.70    1.20
   0  -2  -6   20.50    0.90
   0  -2   6   20.60    1.00
   0   2  -6   19.90    1.10
   0   2  -6   20.10    0.80
   0   2  -6   19.70    1.00
   0   2   6   19.90    0.80
   0   2   6   19.30    0.90
   0   2   6   20.90    0.90
   0   2   6   19.60    1.20
   0  -2   8   79.99    2.70
   0  -2  -8   80.49    2.60
   0  -2  -8   83.99    3.00
   0  -2  -8   80.29    2.70
   0  -2  -8   78.99    2.60
   0  -2   8   76.99    2.60
   0  -2   8   79.49    2.70
   0   2  -8   77.69    2.80
   0   2   8   81.19    2.70
   0   2  -8   79.69    2.60
   0   2   8   81.69    2.70
   0   2   8   79.79    2.60
   0   2   8   82.19    3.00
   0  -2 -10   20.90    1.10
   0  -2 -10   20.30    1.10
   0  -2  10   18.00    0.90
   0  -2 -10   19.70    1.50
   0  -2  10   20.20    1.20
   0  -2  10   19.50    1.10
   0   2  10   19.90    0.90
   0   2  10   20.50    1.10
   0   2  10   21.90    1.50
   0   2 -10   18.30    1.00
   0   2 -10   20.40    1.20
   0   2 -10   20.00    1.00
   0   2  10   20.30    1.20
   0  -2 -12   62.19    2.70
   0  -2  12   62.19    2.50
   0  -2 -12   61.79    2.30
   0  -2  12   60.59    2.30
   0   2  12   58.19    2.60
   0   2  12   63.99    2.40
   0   2 -12   63.19    2.30
   0   2  12   62.89    2.30
   0   2 -12   61.49    2.80
   0  -2  14   11.10    0.80
   0  -2 -14   10.70    1.40
   0  -2 -14    9.80    0.90
   0  -2  14   10.40    1.10
   0   2  14    9.80    0.80
   0   2  14    7.90    1.30
   0   2  14   10.50    1.00
   0   2 -14   10.10    1.70
   0   2 -14   10.80    0.90
   0  -2 -16    2.20    0.50
   0  -2 -16    2.50    0.80
   0   2 -16    1.30    0.40
   0   2  16    1.80    0.40
   0   2  16    2.10    0.80
   0   2  16    1.50    0.50
   0   2 -16    2.80    1.00
   0  -2  18    9.90    0.80
   0  -2 -18   10.30    1.90
   0  -2  18    8.00    1.10
   0  -2 -18    8.30    1.00
   0   2 -18    9.80    1.90
   0   2 -18    7.60    1.00
   0   2  18    8.30    1.00
   0   2  18    9.00    0.80
   0  -2 -20   22.20    1.30
   0  -2 -20   22.00    2.20
   0  -2  20   25.10    1.60
   0  -2  20   21.00    1.30
   0   2  20   20.00    1.50
   0   2 -20   22.90    2.40
   0   2  20   20.70    1.20
   0   2 -20   21.20    1.40
   0  -2 -22   64.59    2.60
   0  -2  22   63.89    2.60
   0  -2  22   66.39    2.80
   0  -2 -22   61.79    3.20
   0   2 -22   66.69    2.60
   0   2  22   65.79    2.70
   0   2  22   64.29    2.70
   0   2 -22   67.19    3.70
   0  -2  24   12.80    1.20
   0  -2 -24   10.10    1.30
   0  -2 -24    8.50    1.40
   0  -2  24   10.10    1.50
   0   2 -24   16.40    2.90
   0   2  24   14.20    1.30
   0   2  24   11.80    1.50
   0  -2 -26   45.00    2.20
   0  -2  26   45.40    2.20
   0  -2  26   42.90    2.40
   0   2  26   43.10    2.30
   0   2  26   42.20    2.10
   0   2 -26   43.80    2.00
   0   2 -26   38.40    3.70
   0  -2  28    0.30    0.90
   0  -2  28   -0.60    0.80
   0   2 -28    0.00    0.90
   0   2  28    0.90    0.90
   0   2  28    1.00    0.80
   0  -2  30   13.10    1.60
   0  -2  30   12.90    1.90
   0  -2 -30   12.40    1.80
   0   2  30    6.90    1.70
   0   2 -30    6.70    1.60
   0  -3  -1  971.90   29.50
   0  -3   1  976.90   29.50
   0  -3   1  983.60   29.50
   0  -3   1  988.40   29.40
   0  -3  -1  964.60   29.50
   0   3  -1  968.30   29.60
   0   3  -1  971.90   29.50
   0   3   1  994.10   29.60
   0   3   1  950.80   29.60
   0   3  -1 1018.20   29.60
   0  -3  -3  188.58    5.90
   0  -3   3  192.48    5.80
   0  -3  -3  184.38    5.90
   0  -3   3  198.58    6.00
   0  -3   3  183.58    5.80
   0  -3  -3  188.58    5.80
   0   3   3  183.08    5.80
   0   3   3  184.68    5.80
   0   3   3  190.68    5.80
   0   3  -3  188.08    5.80
   0   3  -3  194.98    5.90
   0   3  -3  189.68    5.80
   0  -3   5   43.80    1.70
   0  -3  -5   44.70    1.60
   0  -3  -5   43.40    1.50
   0  -3   5   44.50    1.60
   0  -3  -5   42.30    1.50
   0  -3   5   42.90    1.50
   0   3   5   43.40    1.50
   0   3  -5   45.30    1.70
   0   3  -5   43.50    1.60
   0   3   5   43.80    1.60
   0   3   5   44.20    1.50
   0   3  -5   43.80    1.50
   0  -3   7   11.40    0.70
   0  -3  -7   11.60    0.80
   0  -3  -7   10.70    0.70
   0  -3   7   10.90    0.60
   0  -3   7   11.30    0.80
   0  -3  -7   11.40    0.80
   0   3  -7   10.30    0.90
   0   3  -7   11.00    0.90
   0   3   7   10.60    0.70
   0   3   7   11.00    0.60
   0   3   7   11.10    0.70
   0   3   7   11.70    1.00
   0   3  -7   11.70    0.70
   0  -3   9   26.50    1.30
   0  -3   9   29.80    1.30
   0  -3  -9   27.30    1.30
   0  -3   9   24.80    1.10
   0  -3  -9   26.30    1.40
   0   3   9   26.00    1.30
   0   3  -9   27.30    1.20
   0   3  -9   24.20    1.50
   0   3   9   28.60    1.60
   0   3   9   26.20    1.30
   0   3   9   26.60    1.10
   0   3  -9   26.50    1.50
   0  -3 -11   94.59    3.60
   0  -3  11  100.29    3.40
   0  -3 -11   98.69    3.60
   0   3  11   90.29    3.10
   0   3  11   99.99    3.30
   0   3 -11   98.09    3.20
   0   3  11   91.39    3.70
   0  -3 -13  109.59    3.70
   0  -3  13  109.59    3.80
   0  -3  13  109.29    3.70
   0  -3 -13  106.99    4.00
   0   3  13  110.19    3.60
   0   3  13  106.69    3.70
   0   3 -13  107.09    3.50
   0   3  13  102.39    4.10
   0  -3  15    5.70    0.60
   0  -3 -15    5.80    0.80
   0  -3  15    6.00    0.90
   0  -3 -15    6.10    1.20
   0   3  15    5.50    1.40
   0   3 -15    6.10    0.80
   0   3  15    6.70    0.70
   0   3 -15    5.90    1.50
   0   3  15    4.70    0.80
   0  -3  17  166.38    5.50
   0  -3 -17  164.68    6.00
   0  -3  17  158.08    5.50
   0  -3 -17  171.88    5.40
   0   3  17  144.09    5.50
   0   3 -17  160.08    5.80
   0   3 -17  161.48    5.10
   0   3  17  161.08    5.20
   0   3  17  156.78    5.30
   0  -3  19    9.40    1.00
   0  -3 -19   14.50    3.10
   0  -3  19    8.70    1.20
   0  -3 -19   11.90    1.10
   0   3 -19   11.10    1.10
   0   3 -19   11.70    1.90
   0   3  19   11.40    1.00
   0   3  19    9.30    1.10
   0  -3 -21   45.00    2.70
   0  -3  21   47.80    2.00
   0  -3  21   47.20    2.20
   0  -3 -21   48.40    2.10
   0   3 -21   47.50    2.00
   0   3  21   44.70    2.20
   0   3  21   49.00    2.10
   0   3 -21   48.10    3.10
   0  -3 -23    4.50    1.20
   0   3  23    8.50    1.40
   0   3 -23    8.30    1.20
   0   3  23    7.70    1.10
   0  -3 -25   62.99    2.70
   0  -3  25   61.59    2.80
   0  -3  25   62.29    2.60
   0   3 -25   61.79    2.50
   0   3 -25   57.79    3.80
   0   3  25   62.59    2.80
   0   3  25   61.59    2.60
   0  -3  27    6.80    1.40
   0   3 -27    2.90    0.90
   0   3  27    5.40    1.40
   0   3 -27    0.10    2.50
   0  -3  29    8.10    1.80
   0  -3  29    7.40    1.60
   0   3 -29    9.00    1.50
   0   3  29    6.40    1.60
   0   3  29    9.60    1.80
   0  -4   0 1026.90   31.60
   0  -4   0 1043.90   31.50
   0  -4   0 1066.79   31.60
   0   4   0 1059.29   31.40
   0   4   0 1015.40   31.30
   0  -4  -2    4.70    0.50
   0  -4   2    5.20    0.50
   0  -4  -2    4.90    0.70
   0  -4   2    5.40    0.70
   0  -4   2    5.20    0.50
   0  -4  -2    5.00    0.40
   0   4   2    5.20    0.50
   0   4   2    5.20    0.60
   0   4  -2    5.00    0.70
   0   4  -2    5.60    0.60
   0   4  -2    4.10    0.50
   0   4   2    5.40    0.50
   0  -4   4  360.96   11.20
   0  -4  -4  372.76   11.00
   0  -4  -4  355.96   11.10
   0  -4   4  364.96   11.00
   0  -4   4  347.77   11.00
   0  -4  -4  365.16   11.10
   0   4   4  364.56   11.10
   0   4  -4  363.96   11.10
   0   4  -4  362.66   11.20
   0   4   4  363.26   11.20
   0   4  -4  371.06   11.20
   0   4   4  362.36   11.10
   0  -4   6   33.00    1.30
   0  -4   6   36.30    1.60
   0  -4  -6   34.40    1.40
   0  -4   6   36.40    1.40
   0  -4  -6   37.40    1.40
   0  -4  -6   36.40    1.40
   0   4   6   37.00    1.40
   0   4  -6   36.50    1.60
   0   4   6   35.70    1.30
   0   4  -6   35.00    1.50
   0   4   6   36.70    1.40
   0   4  -6   36.00    1.40
   0  -4   8  198.08    6.20
   0  -4  -8  193.28    6.20
   0  -4  -8  202.28    6.30
   0   4   8  189.48    6.40
   0   4   8  196.88    6.00
   0   4  -8  184.38    6.00
   0   4   8  188.88    5.90
   0   4   8  190.38    6.00
   0   4  -8  185.48    6.10
   0   4  -8  193.38    6.20
   0  -4  10   30.20    1.60
   0  -4  10   29.90    1.60
   0  -4 -10   31.40    1.60
   0   4 -10   28.20    1.40
   0   4  10   28.70    1.30
   0   4  10   29.30    1.90
   0   4  10   31.60    1.50
   0   4  10   33.20    1.60
   0   4 -10   27.30    1.60
   0  -4  12  121.89    4.10
   0  -4 -12  121.69    4.10
   0  -4  12  125.59    4.10
   0   4  12  114.19    4.40
   0   4  12  117.49    3.90
   0   4 -12  115.69    3.80
   0   4  12  117.19    3.90
   0  -4 -14  140.39    4.60
   0  -4  14  139.49    4.60
   0  -4  14  138.09    4.60
   0   4  14  127.59    5.00
   0   4  14  133.99    4.50
   0   4 -14  135.79    4.40
   0   4  14  140.29    4.50
   0  -4  16  216.58    7.00
   0  -4 -16  217.68    7.00
   0  -4  16  216.38    7.00
   0   4  16  210.38    6.80
   0   4 -16  212.58    6.70
   0   4  16  193.18    7.20
   0   4  16  222.68    6.80
   0  -4 -18   14.80    1.10
   0  -4  18   11.60    1.00
   0  -4  18   12.00    1.20
   0   4  18   12.10    1.20
   0   4  18   13.80    1.00
   0   4 -18   16.60    1.80
   0   4 -18   15.10    1.10
   0  -4  20    5.30    0.80
   0  -4  20    7.00    1.20
   0  -4 -20    7.30    1.10
   0   4  20    5.30    1.10
   0   4 -20    6.10    1.40
   0   4  20    5.70    0.90
   0   4 -20    6.50    1.00
   0  -4 -22   28.10    1.70
   0  -4  22   29.20    1.80
   0   4 -22   29.60    2.80
   0   4  22   27.60    2.00
   0   4 -22   27.60    1.80
   0  -4  24   13.90    1.30
   0  -4 -24   13.20    1.50
   0  -4  24   14.10    1.60
   0   4  24   12.40    1.30
   0   4 -24   12.90    1.30
   0   4  24   14.90    1.50
   0   4 -24   10.40    2.90
   0  -4  26    1.60    0.80
   0  -4  26    3.20    0.90
   0  -4 -26    2.80    1.00
   0   4  26    2.60    0.90
   0   4  26    1.70    0.80
   0   4 -26    0.00    2.00
   0   4 -26    2.30    0.80
   0  -4  28    2.10    1.00
   0  -4 -28    0.80    1.00
   0  -4  28    1.30    0.90
   0   4 -28   -1.00    0.80
   0   4  28    0.80    1.00
   0   4  28    0.80    0.90
   0  -4 -30    0.80    1.30
   0  -4  30    3.10    1.10
   0   4 -30   -1.90    1.10
   0   4  30   -1.00    1.00
   0  -5   1   16.20    0.70
   0  -5  -1   15.20    0.90
   0  -5   1   15.40    0.80
   0  -5  -1   14.90    0.80
   0  -5  -1   15.40    0.70
   0  -5   1   16.10    0.90
   0   5  -1   15.60    0.90
   0   5   1   15.40    0.80
   0   5   1   14.70    0.90
   0   5  -1   14.70    0.80
   0  -5   3  168.58    5.40
   0  -5  -3  170.98    5.20
   0  -5   3  174.48    5.20
   0  -5   3  166.98    5.30
   0  -5  -3  160.88    5.30
   0  -5  -3  168.48    5.40
   0   5  -3  164.08    5.30
   0   5  -3  171.08    5.40
   0   5   3  168.68    5.30
   0   5   3  161.38    5.30
   0   5  -3  175.48    5.30
   0   5   3  176.18    5.30
   0  -5  -5  247.28    7.60
   0  -5  -5  228.78    7.50
   0  -5   5  246.48    7.70
   0  -5   5  236.98    7.50
   0  -5  -5  243.58    7.40
   0  -5   5  245.28    7.50
   0   5   5  240.88    7.60
   0   5  -5  244.68    7.50
   0   5  -5  247.88    7.70
   0   5   5  241.18    7.50
   0   5   5  239.88    7.50
   0   5  -5  241.98    7.60
   0  -5  -7   15.20    1.20
   0  -5   7   17.30    1.10
   0  -5  -7   14.50    1.10
   0  -5   7   15.50    1.50
   0   5  -7   13.70    1.30
   0   5  -7   14.60    1.40
   0   5   7   14.10    1.00
   0   5   7   12.30    2.00
   0   5  -7   13.90    1.20
   0   5   7   15.00    0.90
   0  -5   9   39.30    2.10
   0  -5   9   38.80    1.70
   0  -5  -9   38.00    1.60
   0  -5  -9   39.80    1.90
   0   5   9   39.90    2.10
   0   5   9   40.90    1.70
   0   5   9   38.20    1.60
   0   5  -9   39.50    1.60
   0   5   9   38.80    1.70
   0   5  -9   36.50    1.90
   0  -5  11   48.10    1.90
   0  -5 -11   47.90    2.10
   0   5  11   44.50    1.80
   0   5  11   46.00    1.90
   0   5  11   44.00    2.40
   0   5 -11   46.00    1.70
   0  -5 -13   13.20    1.00
   0  -5  13   13.50    1.00
   0  -5  13   13.00    0.90
   0   5 -13   13.60    0.90
   0   5  13   14.90    1.60
   0   5  13   12.50    0.90
   0   5  13   13.90    1.00
   0  -5  15    6.20    0.90
   0  -5  15    8.20    0.80
   0  -5 -15    7.70    1.00
   0   5 -15    6.50    0.80
   0   5  15    7.60    0.90
   0   5  15    6.10    0.70
   0  -5 -17  140.99    4.80
   0  -5  17  142.29    4.90
   0  -5  17  146.49    4.90
   0   5  17  145.09    4.80
   0   5 -17  139.89    4.70
   0   5  17  141.59    4.90
   0  -5  19    8.50    0.90
   0  -5 -19    8.10    1.10
   0  -5  19    8.20    1.20
   0   5  19    8.40    1.20
   0   5 -19    9.10    1.90
   0   5 -19    9.80    1.10
   0   5  19    6.40    1.00
   0  -5 -21   24.10    1.60
   0  -5  21   24.10    1.60
   0  -5  21   20.60    1.60
   0   5  21   25.80    1.70
   0   5 -21   27.00    2.60
   0  -5  23   29.70    2.00
   0  -5  23   31.80    1.70
   0   5 -23   27.50    1.60
   0   5 -23   30.10    3.10
   0   5  23   30.20    1.70
   0   5  23   29.00    1.90
   0  -5  25    4.40    0.80
   0  -5  25    5.00    0.90
   0  -5 -25    3.70    1.00
   0   5  25    5.40    1.40
   0   5  25    5.00    1.40
   0   5 -25    7.80    1.20
   0   5 -25    1.50    2.20
   0  -5  27   10.10    1.70
   0  -5  27    9.10    1.40
   0  -5 -27   10.70    1.70
   0   5 -27   10.90    1.40
   0   5  27   11.50    1.50
   0   5 -27    6.80    2.90
   0   5  27   10.80    1.70
   0  -5  29    0.30    0.90
   0  -5 -29    1.40    1.30
   0  -5  29    1.40    1.10
   0   5  29    1.70    1.00
   0   5  29    2.50    1.10
   0  -6   0   30.10    1.50
   0   6   0   30.10    1.40
   0   6   0   30.50    1.40
   0  -6   2  221.08    6.70
   0  -6   2  213.18    7.00
   0  -6  -2  225.68    6.70
   0  -6  -2  215.38    7.00
   0   6  -2  210.08    6.80
   0   6   2  215.58    6.70
   0   6  -2  211.78    6.70
   0   6   2  219.28    6.70
   0  -6  -4  171.68    5.70
   0  -6  -4  178.58    5.50
   0  -6   4  176.58    5.80
   0  -6   4  183.78    5.60
   0   6  -4  180.18    5.60
   0   6  -4  176.48    5.70
   0   6   4  176.88    5.60
   0   6   4  171.18    5.60
   0  -6  -6   34.40    1.70
   0  -6   6   33.60    1.90
   0  -6   6   36.40    1.50
   0  -6  -6   34.50    1.40
   0   6   6   34.90    1.50
   0   6  -6   33.20    1.80
   0   6   6   33.10    1.40
   0   6  -6   36.00    1.50
   0   6   6   35.70    1.60
   0   6  -6   35.10    1.60
   0  -6   8   56.79    2.10
   0  -6  -8   53.99    2.10
   0  -6   8   59.49    2.50
   0  -6  -8   52.09    2.60
   0   6   8   56.29    2.10
   0   6   8   58.79    2.10
   0   6   8   53.99    2.00
   0   6  -8   56.19    2.10
   0   6  -8   54.69    2.30
   0  -6 -10    2.20    0.70
   0  -6  10    1.50    0.70
   0  -6  10    1.80    0.60
   0   6 -10    1.20    0.60
   0   6  10    1.80    0.40
   0   6  10    1.50    0.90
   0   6 -10    1.40    0.50
   0   6  10    1.70    0.70
   0  -6  12   22.00    1.30
   0  -6  12   21.20    1.10
   0  -6 -12   20.50    1.20
   0   6 -12   21.80    1.10
   0   6  12   22.50    1.10
   0   6  12   21.40    1.10
   0  -6  14  132.99    4.50
   0  -6 -14  131.09    4.50
   0  -6  14  134.79    4.50
   0   6  14  129.69    4.40
   0   6 -14  129.49    4.30
   0   6  14  133.79    4.40
   0  -6 -16   29.00    1.50
   0  -6  16   28.00    1.40
   0  -6  16   29.20    1.50
   0   6  16   27.10    1.40
   0   6  16   27.60    1.50
   0   6 -16   28.30    1.40
   0  -6  18   23.40    1.50
   0  -6  18   21.30    1.40
   0  -6 -18   21.80    1.50
   0   6  18   23.00    1.30
   0   6 -18   23.20    1.30
   0   6  18   21.70    1.40
   0  -6  20    3.50    0.90
   0  -6 -20    3.90    0.90
   0  -6  20    4.40    1.10
   0   6 -20    4.40    1.30
   0   6  20    4.90    1.00
   0   6  20    3.00    0.70
   0  -6  22   18.10    1.40
   0  -6  22   17.20    1.80
   0   6 -22   17.40    1.30
   0   6  22   17.70    1.50
   0   6 -22   20.40    2.80
   0  -6  24   14.40    1.60
   0  -6  24   13.30    1.20
   0  -6 -24   13.30    1.70
   0   6 -24   11.80    3.20
   0   6  24   11.90    1.50
   0   6 -24   12.80    1.30
   0   6  24   13.70    1.40
   0  -6  26   53.79    2.50
   0  -6 -26   48.50    2.60
   0  -6  26   50.79    2.60
   0   6  26   52.09    2.50
   0   6  26   49.70    2.60
   0   6 -26   48.10    5.20
   0   6 -26   49.20    2.30
   0  -6  28   33.20    2.20
   0  -6  28   34.20    2.30
   0  -6 -28   31.80    2.30
   0   6 -28   33.30    1.90
   0   6 -28   22.80    6.10
   0   6  28   34.30    2.20
   0   6  28   34.20    2.30
   0  -7   1   31.00    1.80
   0  -7  -1   32.50    1.70
   0   7   1   31.80    1.50
   0   7   1   29.70    1.50
   0   7  -1   31.70    1.50
   0   7  -1   30.20    1.50
   0  -7  -3  158.68    5.00
   0  -7   3  159.98    5.40
   0  -7  -3  158.38    5.30
   0  -7   3  165.28    5.00
   0   7   3  155.38    5.10
   0   7  -3  158.28    5.00
   0   7   3  160.18    5.00
   0   7  -3  149.69    5.10
   0  -7  -5   58.89    2.00
   0  -7   5   60.89    2.10
   0  -7  -5   58.79    2.50
   0   7   5   55.89    2.20
   0   7  -5   56.79    2.20
   0   7   5   61.09    2.20
   0   7  -5   60.79    2.20
   0   7  -5   56.39    2.30
   0   7   5   61.99    2.10
   0  -7  -7   26.20    1.70
   0  -7   7   25.40    1.20
   0  -7  -7   23.90    1.20
   0  -7   7   23.90    1.70
   0   7  -7   24.50    1.40
   0   7   7   23.40    1.20
   0   7  -7   26.40    1.20
   0   7   7   25.30    1.20
   0   7   7   23.50    1.20
   0  -7  -9   49.60    2.10
   0  -7   9   50.19    2.10
   0  -7  -9   45.50    1.80
   0  -7   9   47.40    1.90
   0   7   9   46.40    1.80
   0   7  -9   47.80    1.80
   0   7   9   47.10    1.90
   0   7  -9   43.80    2.00
   0  -7  11   12.60    1.30
   0  -7  11   12.40    1.20
   0  -7 -11   11.40    1.10
   0   7  11   12.10    1.00
   0   7 -11   11.50    0.90
   0   7  11   12.00    0.90
   0  -7 -13   87.69    3.20
   0  -7  13   90.19    3.10
   0  -7  13   86.99    3.20
   0   7 -13   85.89    3.00
   0   7  13   88.29    3.10
   0   7  13   88.39    3.10
   0  -7 -15  106.19    3.80
   0  -7  15  103.89    3.60
   0  -7  15  102.99    3.70
   0   7 -15  103.19    3.60
   0   7  15  105.29    3.70
   0   7  15  102.19    3.70
   0  -7 -17   11.20    1.20
   0  -7  17    8.70    1.10
   0  -7  17    8.50    1.00
   0   7 -17    7.50    1.00
   0   7  17    7.30    1.10
   0   7  17    9.70    1.00
   0  -7  19    8.40    1.20
   0  -7 -19    8.90    1.40
   0  -7  19    9.90    1.10
   0   7  19    6.80    1.10
   0   7  19    7.80    1.10
   0  -7  21    7.30    1.30
   0  -7  21    9.30    1.20
   0   7 -21    5.60    1.10
   0   7  21    7.70    1.20
   0   7  21    8.40    1.20
   0   7 -21   11.30    2.60
   0  -7  23   10.10    1.40
   0  -7  23    9.30    1.50
   0  -7 -23    6.30    1.70
   0   7  23   10.70    1.30
   0   7 -23    6.00    1.10
   0   7  23    8.50    1.40
   0  -7 -25    0.30    1.00
   0  -7  25    0.90    0.90
   0  -7  25   -1.50    0.80
   0   7 -25    1.40    2.20
   0   7  25   -0.10    0.90
   0   7 -25   -0.10    0.80
   0   7  25   -0.20    0.80
   0  -7  27    4.00    1.00
   0  -7 -27    2.90    1.40
   0  -7  27    5.20    1.10
   0   7  27    4.70    1.10
   0   7 -27    5.80    1.50
   0   7  27    5.00    1.00
   0   7 -27    6.90    2.60
   0   8   0    6.80    0.70
   0   8   0    6.20    1.00
   0  -8   2   11.00    1.30
   0   8   2   11.80    0.80
   0   8  -2   10.50    1.00
   0   8   2   10.50    1.00
   0   8  -2   12.30    0.80
   0  -8  -4  109.19    3.50
   0  -8  -4  107.99    3.90
   0  -8   4  108.99    3.90
   0  -8   4  110.89    3.50
   0   8   4  101.09    3.60
   0   8  -4  112.29    3.60
   0   8   4  108.09    3.60
   0  -8   6   19.20    0.90
   0  -8  -6   20.90    1.40
   0  -8  -6   19.20    1.00
   0  -8   6   20.80    1.40
   0   8   6   20.00    1.10
   0   8   6   19.60    1.10
   0   8  -6   19.80    1.20
   0   8   6   18.60    1.10
   0   8  -6   19.80    1.00
   0  -8  -8   82.09    3.00
   0  -8   8   84.19    3.10
   0  -8   8   80.49    2.70
   0  -8  -8   76.49    2.80
   0   8  -8   75.99    3.00
   0   8   8   80.49    2.80
   0   8  -8   81.79    2.70
   0   8   8   79.09    2.80
   0  -8 -10    0.50    0.60
   0  -8  10    0.30    0.60
   0  -8  10    0.20    0.50
   0   8 -10    0.50    0.40
   0   8  10   -0.10    0.40
   0  -8  12    0.70    0.70
   0  -8 -12    0.50    0.70
   0  -8  12    0.90    0.50
   0   8  12    1.30    0.50
   0   8  12    1.20    0.50
   0   8 -12    0.40    0.50
   0  -8 -14   11.40    1.30
   0  -8  14   11.90    1.00
   0  -8  14   11.00    1.00
   0   8 -14   11.00    1.00
   0   8  14   11.60    1.00
   0   8  14   11.10    1.00
   0  -8 -16   28.70    1.70
   0  -8  16   31.30    1.60
   0  -8  16   29.90    1.60
   0   8  16   29.50    1.60
   0   8  16   31.40    1.60
   0   8 -16   30.80    1.50
   0  -8 -18   -0.80    0.90
   0  -8  18    0.50    0.60
   0  -8  18    1.30    0.60
   0   8 -18    0.90    0.80
   0   8  18    0.70    0.60
   0   8  18    1.20    0.60
   0  -8  20    3.90    0.70
   0  -8 -20    3.70    0.90
   0  -8  20    4.30    0.80
   0   8  20    2.80    0.80
   0   8 -20    4.50    0.80
   0   8  20    5.60    1.20
   0  -8  22    6.60    1.30
   0  -8 -22    6.90    1.20
   0   8 -22    5.20    1.10
   0   8  22    7.60    1.40
   0   8  22    6.80    1.40
   0  -8  24    0.30    0.90
   0  -8 -24   -1.00    1.20
   0  -8  24    0.60    0.80
   0   8 -24   -1.10    2.10
   0   8 -24    1.40    0.70
   0   8  24   -0.20    0.90
   0   8  24    1.20    0.90
   0  -8  26    2.70    1.10
   0  -8  26    1.40    1.00
   0  -8 -26   -1.00    1.40
   0   8  26    0.80    1.00
   0   8 -26   -1.50    0.80
   0   8 -26    1.60    2.50
   0   8  26    0.10    1.00
   0  -9  -1   12.70    1.20
   0  -9   1   14.00    1.20
   0   9  -1   13.20    0.80
   0   9   1   12.70    0.90
   0  -9  -3   80.39    3.10
   0  -9   3   84.89    3.10
   0   9   3   86.49    3.00
   0   9  -3   85.19    2.90
   0  -9  -5   79.49    2.70
   0  -9   5   81.99    3.10
   0  -9   5   82.79    2.70
   0  -9  -5   80.79    3.00
   0   9   5   81.79    2.80
   0   9  -5   79.49    2.80
   0  -9  -7    8.50    0.80
   0  -9   7    7.90    1.10
   0  -9   7    8.10    0.70
   0  -9  -7    5.30    1.00
   0   9   7    6.90    0.80
   0   9  -7    6.70    0.70
   0   9  -7    7.10    1.20
   0  -9   9  153.18    4.90
   0  -9   9  149.19    5.30
   0  -9  -9  156.78    5.20
   0   9  -9  136.79    5.00
   0   9   9  157.48    5.00
   0   9   9  152.38    5.00
   0   9  -9  155.38    4.90
   0  -9  11  163.98    5.50
   0  -9 -11  166.18    5.60
   0  -9  11  162.88    5.70
   0   9  11  164.48    5.40
   0   9  11  160.58    5.40
   0   9 -11  162.48    5.30
   0  -9 -13    2.40    0.70
   0  -9  13    4.20    0.80
   0   9 -13    3.40    0.90
   0   9  13    4.00    0.90
   0   9  13    2.80    0.50
   0  -9  15   19.60    1.40
   0  -9 -15   23.10    1.70
   0  -9  15   21.20    1.30
   0   9  15   22.70    1.40
   0   9 -15   21.50    1.30
   0   9  15   23.90    1.40
   0  -9  17  127.19    4.50
   0  -9  17  127.19    4.40
   0  -9 -17  129.79    4.70
   0   9  17  125.49    4.40
   0   9  17  121.59    4.60
   0   9 -17  124.79    4.30
   0  -9  19   11.00    1.20
   0  -9 -19   11.90    1.60
   0  -9  19    9.70    1.20
   0   9 -19   10.60    1.10
   0   9  19   12.80    1.20
   0   9  19    8.20    1.30
   0  -9  21    3.70    0.80
   0  -9 -21    2.70    1.10
   0  -9  21    4.00    0.80
   0   9  21    3.00    0.80
   0   9 -21    2.00    0.70
   0  -9 -23    3.50    1.20
   0  -9  23    3.70    0.90
   0   9  23    2.10    1.00
   0   9  23    1.30    0.90
   0   9 -23    1.10    0.80
   0  -9 -25    2.80    1.40
   0  -9  25    3.70    1.00
   0  -9  25    5.60    1.10
   0   9 -25    3.20    2.40
   0   9 -25    2.90    0.90
   0   9  25    3.70    1.10
   0   9  25    2.80    1.00
   0 -10   0   51.39    2.20
   0  10   0   53.79    2.00
   0 -10   2   16.20    1.30
   0 -10  -2   15.70    1.30
   0  10   2   15.70    1.00
   0  10  -2   14.90    1.00
   0 -10  -4   11.20    1.10
   0 -10   4   11.00    1.30
   0 -10  -4    9.90    0.70
   0  10   4    9.10    0.90
   0  10  -4   11.10    0.90
   0 -10  -6   32.50    1.70
   0 -10  -6   29.30    1.20
   0 -10   6   31.20    1.80
   0 -10   6   30.00    1.20
   0  10   6   30.00    1.40
   0  10  -6   31.00    1.40
   0 -10  -8  113.89    3.80
   0 -10   8  105.19    3.40
   0 -10  -8   89.89    3.40
   0 -10   8  101.79    3.90
   0  10   8  102.09    3.50
   0  10  -8   95.19    3.50
   0  10  -8  104.69    3.50
   0 -10  10  154.98    5.10
   0 -10 -10  160.98    5.50
   0 -10  10  154.28    5.50
   0  10  10  154.58    5.40
   0  10 -10  162.88    5.20
   0  10  10  161.38    5.30
   0 -10  12  160.28    5.80
   0 -10 -12  164.38    5.70
   0 -10  12  163.68    5.30
   0  10 -12  159.58    5.20
   0  10  12  159.38    5.30
   0  10  12  157.98    5.30
   0 -10  14  261.17    8.40
   0 -10 -14  270.47    8.80
   0  10  14  263.27    8.50
   0  10  14  261.57    8.50
   0 -10  16    8.40    1.00
   0 -10 -16    5.90    1.50
   0  10  16    6.80    1.20
   0  10 -16    6.70    1.00
   0 -10  18    2.10    0.60
   0 -10  18    0.70    0.70
   0  10 -18    2.40    0.70
   0  10  18    1.90    0.80
   0  10  18    0.50    0.70
   0 -10  20    4.70    1.20
   0 -10 -20    1.30    1.20
   0 -10  20    2.50    0.80
   0  10  20    4.00    0.80
   0  10  20    2.90    0.80
   0  10 -20    2.20    0.70
   0 -10  22    2.70    0.90
   0 -10 -22    2.90    1.20
   0 -10  22    1.30    0.90
   0  10  22    1.80    0.90
   0  10  22    3.50    1.00
   0  10 -22    2.80    0.80
   0 -10 -24    0.90    1.50
   0 -10  24    2.40    1.00
   0 -10  24    0.30    1.00
   0  10 -24    2.80    0.90
   0  10 -24    7.20    2.50
   0  10  24    2.60    1.00
   0 -11  -1    0.40    0.70
   0 -11   1    1.90    0.70
   0  11   1    0.90    0.50
   0  11  -1    0.50    0.50
   0 -11  -3   18.50    1.50
   0 -11   3   22.90    1.60
   0  11  -3   19.50    1.20
   0  11   3   20.10    1.20
   0 -11   5   38.30    2.10
   0 -11  -5   39.10    2.00
   0  11  -5   38.60    1.70
   0  11   5   41.80    1.70
   0 -11  -7   15.80    1.50
   0 -11   7   16.60    0.80
   0 -11   7   17.40    1.60
   0  11  -7   17.60    1.10
   0  11   7   18.00    1.10
   0 -11   9   30.20    1.90
   0 -11   9   27.60    1.20
   0 -11  -9   29.20    1.90
   0  11   9   28.60    1.50
   0  11  -9   30.20    1.50
   0 -11 -11   32.50    2.00
   0 -11  11   32.50    2.00
   0  11 -11   30.70    1.50
   0  11  11   30.90    1.60
   0  11  11   27.50    1.60
   0 -11  13    4.90    0.80
   0 -11 -13    6.50    1.50
   0 -11  13    3.40    0.90
   0  11 -13    3.50    0.90
   0  11  13    4.20    0.70
   0  11  13    6.20    1.00
   0 -11 -15    6.70    1.60
   0 -11  15    5.10    1.00
   0  11  15    4.30    0.80
   0  11 -15    4.70    1.00
   0  11  15    6.50    1.20
   0 -11  17    2.20    0.80
   0 -11  17    1.20    0.70
   0  11 -17    1.90    0.70
   0  11  17    3.20    0.80
   0  11  17    1.60    0.90
   0 -11  19    2.20    0.80
   0 -11 -19    0.10    1.20
   0  11 -19    0.40    0.70
   0  11  19    1.30    0.80
   0  11  19    2.60    0.90
   0 -11 -21   15.70    2.20
   0 -11  21   15.00    1.60
   0  11  21   15.10    1.60
   0  11 -21   15.20    1.30
   0  11  21   17.40    1.90
   0 -11  23    7.40    1.60
   0  11  23   11.90    1.80
   0  11 -23    9.00    1.40
   0 -12   0   13.70    1.60
   0  12   0   13.00    1.10
   0 -12  -2   35.70    2.10
   0 -12   2   32.40    2.10
   0  12   2   36.40    1.60
   0  12  -2   36.30    1.60
   0 -12   4    0.20    0.80
   0 -12  -4    1.90    0.80
   0  12  -4    1.40    0.60
   0  12   4    1.50    0.60
   0 -12   6   -0.50    0.90
   0 -12  -6   -0.30    0.90
   0  12   6    1.00    0.60
   0  12  -6    1.00    0.60
   0 -12  -8   77.79    3.40
   0 -12   8   81.69    3.40
   0  12  -8   76.29    2.80
   0  12   8   79.39    2.90
   0 -12  10   11.30    1.70
   0 -12 -10   11.80    1.60
   0  12  10   10.40    1.10
   0 -12  12   25.90    2.30
   0 -12 -12   21.30    2.00
   0  12 -12   21.00    1.30
   0 -12  14   17.60    2.00
   0 -12 -14   15.00    1.90
   0  12 -14   16.40    1.20
   0  12  14   11.00    1.40
   0 -12 -16    2.40    1.30
   0  12  16    5.10    1.30
   0  12 -16    4.30    1.10
   0 -12  18    9.80    1.50
   0 -12 -18   11.60    2.10
   0  12  18    7.60    1.50
   0  12 -18    8.10    1.20
   0 -12 -20   44.90    2.90
   0 -12  20   44.90    2.30
   0  12 -20   44.20    2.10
   0  12  20   48.00    2.40
   0 -13  -1   20.30    1.80
   0 -13   1   21.60    1.90
   0  13  -1   24.60    1.30
   0  13   1   21.50    1.30
   0 -13  -3    3.40    1.00
   0 -13   3    3.10    1.00
   0  13  -3    4.10    0.90
   0  13   3    3.70    0.90
   0 -13  -5   22.20    1.90
   0 -13   5   22.00    1.90
   0  13   5   20.90    1.30
   0 -13   7    2.60    1.00
   0 -13  -7    4.20    1.10
   0  13  -7    4.80    0.80
   0  13   7    5.20    1.30
   0 -13   9   10.40    1.70
   0 -13  -9    7.80    1.20
   0  13   9    4.90    1.10
   0  13  -9    3.90    0.70
   0 -13 -11    1.20    1.20
   0 -13  11    3.90    1.30
   0  13  11    2.80    0.70
   0  13 -11    3.30    0.70
   0 -13  13   39.50    2.60
   0  13  13   41.80    2.00
   0  13 -13   43.00    1.90
   0 -13 -15    1.10    1.30
   0  13  15    2.20    0.80
   0  13 -15    1.30    0.70
   0 -13  17    0.60    1.00
   0 -13 -17    0.60    1.40
   0  13 -17    1.10    0.80
   0  13  17    3.10    1.00
   0 -13 -19    6.00    1.60
   0  13 -19    1.50    0.90
   0  13  19    2.90    1.10
   0 -14   0  184.78    6.60
   0  14   0  191.38    6.30
   0 -14   2   35.80    2.40
   0 -14  -2   35.20    2.30
   0  14   2   34.40    1.70
   0  14  -2   32.90    1.60
   0 -14  -4    8.70    1.90
   0 -14   4    6.10    1.10
   0  14   4    5.40    0.80
   0  14  -4    7.70    1.00
   0 -14  -6    5.00    1.20
   0  14   6    5.00    1.20
   0  14  -6    5.00    1.00
   0 -14   8    7.10    1.70
   0  14   8    5.90    1.20
   0  14  -8    7.40    1.10
   0 -14 -10    3.50    1.50
   0 -14  10    3.60    1.20
   0  14  10    6.10    1.20
   0  14 -10    6.80    1.10
   0 -14  12   -1.50    1.20
   0 -14 -12   -0.70    1.30
   0  14 -12    0.10    0.70
   0  14  12    2.00    0.80
   0 -14  14    1.90    1.30
   0 -14 -14    1.40    1.40
   0  14  14    5.50    1.40
   0  14 -14    2.50    0.70
   0 -14 -16    4.10    1.50
   0  14 -16    1.80    0.80
   0  14  16    0.80    0.90
   0 -15   1   19.10    2.60
   0 -15  -1   23.90    2.90
   0  15  -1   23.20    1.40
   0  15   1   24.90    1.50
   0 -15   3   28.60    2.30
   0 -15  -3   24.40    2.50
   0  15  -3   30.90    1.60
   0  15   3   30.50    1.70
   0 -15   5    1.50    1.20
   0 -15  -5    2.20    1.30
   0  15  -5    2.40    0.70
   0  15   5    1.90    0.80
   0 -15   7   11.40    2.20
   0 -15  -7   11.60    2.30
   0  15   7   13.60    1.30
   0  15  -7   14.10    1.20
   0 -15   9   15.10    2.30
   0 -15  -9   18.10    2.30
   0  15  -9   15.70    1.30
   0  15   9   14.90    1.50
   0 -15  11    4.10    1.40
   0 -15 -11    0.60    1.50
   0  15 -11    0.10    0.80
   0  15  11    2.80    0.90
   0 -15 -13   -0.50    1.50
   0 -15  13   -1.40    1.40
   0  15 -13    0.20    0.80
   0  15  13    1.90    0.90
   0 -16   0   11.50    2.40
   0  16   0   20.40    1.40
   0 -16   2    4.40    1.40
   0 -16  -2    5.00    1.40
   0  16   2    4.90    0.80
   0 -16   4    8.40    1.40
   0 -16  -4   10.60    2.30
   0  16   4   12.70    1.40
   0  16  -4    8.90    1.20
   0 -16  -6   11.20    2.50
   0 -16   6    9.20    1.50
   0  16   6   13.10    1.50
   0  16  -6   11.40    1.30
   0 -16  -8    2.40    1.50
   0 -16   8    2.70    1.50
   0  16   8    4.40    0.90
   0  16  -8    3.40    0.80
   0 -16 -10    0.20    1.60
   0 -16  10    1.00    1.50
   0  16  10   -0.20    1.00
   0  16 -10    1.10    0.80
   0 -17   1   22.90    2.70
   1   0  29    0.20    0.80
   1   0  29    0.10    1.00
  -1   0 -29   -1.60    1.00
   1   0  27    9.10    1.60
   1   0  27    6.60    1.40
  -1   0 -27    7.50    1.40
   1   0  25    1.40    0.80
   1   0  25    1.80    0.70
  -1   0 -25   -0.50    1.80
  -1   0 -25   -0.50    0.80
   1   0  23   15.40    1.60
  -1   0 -23   16.60    2.80
   1   0  23   12.60    1.40
  -1   0 -23   14.60    1.50
  -1   0 -21    1.80    0.70
  -1   0 -21    0.40    1.40
   1   0  21    1.00    0.50
   1   0  21    1.40    0.70
  -1   0 -19    6.10    1.00
  -1   0 -19    8.20    2.00
   1   0  19    7.50    0.80
   1   0  19    5.90    1.10
   1   0  17    1.80    0.50
  -1   0 -17    2.70    1.10
  -1   0 -17    1.40    0.50
  -1   0 -15    2.40    0.50
   1   0  15    2.80    0.60
  -1   0 -15    5.30    2.30
   1   0  15    2.20    0.60
   1   0  13   11.50    1.20
   1   0  13   11.00    1.10
   1   0  13   13.10    1.00
  -1   0 -13   14.90    2.00
  -1   0 -13   11.90    1.00
  -1   0 -11    0.70    0.90
   1   0  11   -0.50    0.70
  -1   0 -11   -0.10    0.60
   1   0  11   -0.20    0.60
  -1   0  -9    1.40    0.50
   1   0   9    1.50    0.40
  -1   0  -9    1.70    0.70
   1   0   9    1.20    0.30
  -1   0  -9    0.90    0.40
   1   0   9    1.30    0.50
   1   0   9    2.00    0.50
  -1   0  -9    1.30    0.40
  -1   0  -7    0.30    0.70
  -1   0  -7    0.70    0.30
  -1   0  -7    0.10    0.40
  -1   0  -7    0.50    0.30
   1   0   7    0.20    0.50
   1   0   7    0.20    0.30
   1   0   7    0.60    0.30
   1   0   7    0.50    0.30
   1   0   5    5.20    0.60
  -1   0  -5    4.30    0.50
  -1   0  -5    5.40    0.50
   1   0   5    5.10    0.90
   1   0   5    5.20    0.50
  -1   0  -5    5.20    1.30
  -1   0  -5    3.80    0.70
   1   0   5    4.90    0.70
  -1   0  -3    0.90    0.50
   1   0   3    1.10    0.20
   1   0   3    1.20    0.30
  -1   0  -3    0.70    0.20
   1   0   3    0.10    0.50
  -1   0  -3    0.70    0.30
  -1   0  -3    1.10    0.20
   1   0   3    0.70    0.30
   1   0  -3    0.50    0.30
  -1   0   3    0.40    0.40
   1   0  -3    0.40    0.20
  -1   0   3    0.20    0.20
  -1   0   3    0.40    0.20
   1   0  -3    0.20    0.20
   1   0  -5    0.10    0.30
  -1   0   5    0.80    0.50
  -1   0   5    0.30    0.30
   1   0  -5    0.20    0.30
  -1   0   5    0.30    0.30
   1   0  -5    0.10    0.50
   1   0  -7    3.90    0.60
  -1   0   7    4.10    0.50
  -1   0   7    3.50    0.70
  -1   0   7    3.90    0.40
   1   0  -7    4.30    0.50
   1   0  -7    4.30    0.50
   1   0  -7    3.70    0.80
  -1   0   9    2.20    0.40
   1   0  -9    2.40    0.50
   1   0  -9    2.50    0.50
   1   0  -9    3.10    0.80
  -1   0   9    1.90    0.50
   1   0  -9    1.90    0.60
  -1   0   9    2.40    0.50
   1   0 -11    7.80    0.80
   1   0 -11    6.90    1.10
  -1   0  11    7.00    0.70
   1   0 -13   73.79    3.00
  -1   0  13   74.69    2.60
   1   0 -13   73.29    2.60
  -1   0  13   73.09    2.80
   1   0 -15    5.40    0.80
  -1   0  15    6.10    0.70
   1   0 -15    6.20    1.30
  -1   0  15    6.40    1.00
   1   0 -17    3.60    0.90
  -1   0  17    4.50    0.70
   1   0 -17    3.60    0.80
  -1   0  17    5.00    0.90
  -1   0  19    3.50    0.70
  -1   0  19    2.40    0.60
   1   0 -19    4.70    1.00
   1   0 -19    1.70    1.10
  -1   0  21    0.40    0.50
   1   0 -21    1.00    0.70
  -1   0  21    1.30    0.70
   1   0 -21    0.10    1.60
   1   0 -23   22.60    1.40
   1   0 -23   23.00    2.40
  -1   0  25   13.70    1.30
   1   0 -25   12.60    1.50
  -1   0  25   12.40    1.40
   1   0 -27    1.60    0.90
  -1   0  27    1.50    0.80
  -1   0  27    2.00    0.90
   1   0 -29    4.10    1.00
  -1   0  29    3.60    1.00
  -1  -1 -30    7.70    1.60
   1  -1  30    8.10    1.70
   1   1  30    3.70    1.00
  -1   1 -30    4.00    1.10
   1   1  30    3.30    1.10
   1  -1  28    0.10    0.90
  -1  -1 -28    0.40    1.00
   1  -1  28    1.40    1.00
  -1   1 -28    0.90    0.90
   1   1  28    0.00    0.90
   1   1  28    1.20    0.80
  -1  -1 -26    1.80    1.80
   1  -1  26    2.90    0.70
   1  -1  26    5.80    1.40
  -1  -1 -26    2.10    0.90
   1   1  26    2.70    0.70
  -1   1 -26    2.30    2.00
   1   1  26    2.80    0.90
  -1   1 -26    1.90    0.80
   1  -1  24    0.70    0.60
   1  -1  24    2.40    0.80
  -1  -1 -24    1.00    1.60
  -1  -1 -24    1.10    0.70
   1   1  24    0.60    0.70
  -1   1 -24    1.30    1.80
  -1   1 -24    1.10    0.70
   1  -1  22  149.79    5.20
   1  -1  22  149.29    5.30
  -1  -1 -22  147.89    5.10
  -1  -1 -22  154.28    6.10
  -1   1 -22  152.38    5.10
   1   1  22  138.79    5.60
  -1   1 -22  152.58    6.30
   1   1  22  151.28    5.20
   1  -1  20   31.00    1.70
   1  -1  20   31.10    1.50
  -1  -1 -20   31.90    2.40
  -1  -1 -20   27.00    1.50
  -1   1 -20   29.90    1.50
   1   1  20   29.10    1.70
   1   1  20   27.60    1.50
  -1   1 -20   27.00    2.70
  -1  -1 -18   19.30    1.20
  -1  -1 -18   20.10    2.20
   1  -1  18   18.50    1.10
   1  -1  18   16.90    1.20
   1   1  18   18.20    1.30
   1   1  18   17.20    1.10
  -1   1 -18   20.20    1.20
  -1   1 -18   20.20    2.10
  -1  -1 -16    0.50    1.10
  -1  -1 -16    1.00    0.40
   1  -1  16    0.30    0.40
   1  -1  16    0.20    0.50
   1   1  16    1.10    0.40
  -1   1 -16    0.60    0.40
  -1   1 -16    0.10    1.00
   1   1  16    0.70    0.40
   1  -1  14  105.39    3.50
  -1  -1 -14  103.59    3.50
   1  -1  14  102.99    3.60
  -1  -1 -14  104.89    4.40
  -1   1 -14  105.99    3.40
   1   1  14  104.89    3.50
   1   1  14  102.19    3.60
   1   1  14   91.09    4.00
  -1  -1 -10   50.79    2.50
   1  -1  10   52.59    1.90
   1  -1  10   48.20    1.80
   1  -1  10   50.69    2.00
  -1  -1 -10   51.09    1.90
  -1  -1 -10   47.40    1.80
   1   1  10   51.09    1.90
   1   1  10   50.59    2.00
   1   1  10   49.60    1.80
   1   1  10   50.39    2.40
  -1   1 -10   50.39    2.50
  -1   1 -10   51.99    1.90
  -1   1 -10   49.30    1.90
  -1   1 -10   49.30    1.90
  -1  -1  -8   64.99    2.70
   1  -1   8   66.39    2.20
  -1  -1  -8   61.69    2.20
  -1  -1  -8   61.19    2.20
  -1  -1  -8   66.49    2.20
   1  -1   8   63.39    2.10
   1  -1   8   64.39    2.20
   1   1   8   63.79    2.20
   1   1   8   65.39    2.20
   1   1   8   61.89    2.60
  -1   1  -8   67.89    2.70
   1   1   8   64.49    2.30
  -1   1  -8   64.09    2.20
  -1   1  -8   64.99    2.20
  -1   1  -8   64.69    2.20
  -1  -1  -6  474.45   14.40
   1  -1   6  461.45   14.00
   1  -1   6  458.55   13.90
  -1  -1  -6  465.05   13.90
  -1  -1  -6  460.65   14.00
  -1  -1  -6  448.26   13.90
   1  -1   6  439.66   13.90
   1   1   6  455.15   14.00
   1   1   6  467.05   14.40
  -1   1  -6  460.15   14.00
  -1   1  -6  477.95   14.40
  -1   1  -6  457.55   14.00
   1   1   6  443.36   14.00
  -1   1  -6  450.75   14.00
   1   1   6  469.15   14.00
  -1  -1  -4  700.53   21.10
   1  -1   4  666.73   20.70
  -1  -1  -4  680.53   20.80
  -1  -1  -4  686.63   20.80
   1  -1   4  692.03   20.80
  -1  -1  -4  696.13   20.80
   1  -1   4  687.03   20.80
   1   1   4  698.23   20.90
  -1   1  -4  673.93   20.50
   1   1   4  661.83   20.60
  -1   1  -4  681.43   20.60
  -1   1  -4  694.03   20.90
  -1   1  -4  692.83   20.60
   1   1   4  674.63   20.60
   1   1   4  669.43   20.60
  -1  -1  -2  339.77    9.80
   1  -1   2  293.27    9.80
  -1  -1  -2  317.67   10.00
   1  -1   2  320.47    9.80
  -1  -1  -2  329.27    9.80
  -1  -1  -2  340.67    9.90
   1   1   2  322.47   10.00
  -1   1  -2  333.87   10.20
  -1   1  -2  338.07   10.00
  -1   1  -2  322.57   10.00
   1   1   2  336.17   10.10
  -1   1  -2  316.47   10.00
   1   1   2  332.87   10.00
   1   1   2  339.57   10.30
  -1  -1   0  171.38    5.50
  -1  -1   0  177.48    5.30
   1   1   0  169.68    5.30
   1  -1  -2   74.59    2.30
   1  -1  -2   70.69    2.40
  -1  -1   2   80.19    2.30
  -1  -1   2   70.69    2.40
  -1  -1   2   78.19    2.40
  -1   1   2   78.99    2.40
   1   1  -2   82.19    2.50
   1   1  -2   70.39    2.40
   1   1  -2   80.39    2.60
  -1   1   2   77.49    2.50
  -1   1   2   81.29    2.40
   1  -1  -4  203.68    6.10
   1  -1  -4  199.78    6.00
  -1  -1   4  193.78    6.10
  -1  -1   4  191.78    6.10
  -1  -1   4  194.48    6.00
   1  -1  -4  197.98    6.00
   1   1  -4  190.68    6.20
  -1   1   4  205.38    6.10
  -1   1   4  201.28    6.00
  -1   1   4  199.28    6.10
   1   1  -4  195.98    6.10
   1  -1  -6  314.17    9.70
  -1  -1   6  318.27    9.70
   1  -1  -6  311.87    9.70
   1  -1  -6  324.87    9.60
  -1  -1   6  310.57    9.70
   1  -1  -6  317.27    9.80
  -1  -1   6  324.37    9.80
  -1   1   6  331.77    9.70
   1   1  -6  312.07    9.80
   1   1  -6  311.37    9.70
  -1   1   6  316.27    9.70
  -1   1   6  314.07    9.60
  -1   1   6  312.47    9.70
   1   1  -6  316.77    9.60
   1  -1  -8   24.30    1.20
  -1  -1   8   23.50    1.00
   1  -1  -8   23.50    1.00
   1  -1  -8   23.10    1.00
  -1  -1   8   22.90    0.90
  -1  -1   8   23.60    1.10
   1  -1  -8   24.00    1.20
   1   1  -8   22.60    1.20
  -1   1   8   23.50    0.90
  -1   1   8   22.80    0.90
   1   1  -8   22.60    1.00
  -1   1   8   22.90    1.10
   1   1  -8   24.10    1.00
  -1   1   8   23.50    1.00
  -1  -1  10   49.60    1.90
   1  -1 -10   49.80    1.90
   1  -1 -10   51.69    1.80
  -1  -1  10   50.49    2.00
   1  -1 -10   53.09    2.10
   1  -1 -10   46.60    1.80
  -1  -1  10   47.20    1.70
   1   1 -10   46.70    2.00
  -1   1  10   48.80    1.70
  -1   1  10   50.89    1.90
   1   1 -10   50.49    1.80
   1   1 -10   45.60    1.80
  -1   1  10   55.49    1.80
  -1  -1  12  900.91   27.70
   1  -1 -12  962.40   27.90
   1  -1 -12  898.01   27.60
  -1  -1  12  879.51   27.70
   1   1 -12  941.21   27.40
  -1   1  12  861.21   27.00
   1   1 -12  842.62   27.10
  -1   1  12  904.41   27.20
  -1   1  12  909.11   27.10
   1  -1 -14  183.48    6.20
  -1  -1  14  180.28    5.80
   1  -1 -14  183.98    5.80
  -1  -1  14  177.98    5.90
  -1   1  14  178.58    5.90
  -1   1  14  180.78    5.80
   1   1 -14  182.98    6.20
   1   1 -14  180.48    5.80
  -1  -1  16    5.10    0.90
  -1  -1  16    6.10    0.70
   1  -1 -16    5.90    0.80
   1   1 -16    4.40    0.90
   1   1 -16    5.00    0.70
  -1   1  16    5.50    0.80
  -1   1  16    5.40    0.60
  -1  -1  18    9.30    1.10
   1  -1 -18    8.60    0.90
  -1  -1  18    6.90    0.70
   1  -1 -18    8.00    1.50
  -1   1  18    7.50    0.80
   1   1 -18    8.90    0.90
  -1   1  18    6.40    1.00
   1   1 -18    7.30    1.90
   1  -1 -20    4.40    1.00
   1  -1 -20    7.20    1.90
  -1  -1  20    6.60    0.80
  -1  -1  20    6.00    1.20
  -1   1  20    5.30    1.10
  -1   1  20    6.10    0.80
   1   1 -20    4.10    0.90
   1   1 -20    6.70    1.90
   1  -1 -22    1.60    0.70
   1   1 -22    2.00    1.30
   1   1 -22    1.90    0.70
  -1   1  22    1.00    0.70
  -1  -1  24   44.70    2.10
  -1  -1  24   43.70    2.30
   1   1 -24   44.10    3.10
  -1   1  24   48.20    2.10
  -1   1  24   45.30    2.30
   1   1 -24   43.10    2.10
  -1  -1  26    6.90    1.10
  -1  -1  26   10.70    1.40
   1  -1 -26   11.00    1.40
  -1   1  26    8.30    1.20
  -1   1  26    8.10    1.50
   1   1 -26   11.20    1.40
  -1  -1  28    1.30    0.90
  -1  -1  28    1.20    0.80
   1  -1 -28   -1.10    0.80
  -1   1  28    0.70    0.80
  -1   1  28    1.70    0.90
   1   1 -28   -0.40    0.80
  -1  -1  30    7.20    1.60
   1  -1 -30    5.10    1.00
  -1  -1  30    8.30    1.80
   1   1 -30    3.70    1.10
  -1   1  30    4.10    1.00
  -1   1  30    5.00    1.10
   1  -2  29    3.10    0.90
   1  -2  29    3.30    1.10
  -1  -2 -29    2.60    1.00
  -1   2 -29    2.70    0.90
   1   2  29    3.70    1.00
  -1  -2 -27   15.10    1.60
   1  -2  27   14.30    1.50
   1  -2  27   13.10    1.70
   1   2  27   17.10    1.40
  -1   2 -27   13.30    1.40
   1   2  27   14.80    1.80
  -1   2 -27   12.30    2.40
  -1  -2 -25    2.60    0.90
   1  -2  25    1.20    0.60
   1  -2  25    0.20    0.80
  -1  -2 -25    0.80    1.70
  -1   2 -25   -2.10    1.80
   1   2  25    0.80    0.70
  -1   2 -25    2.50    0.80
   1   2  25    1.20    0.80
  -1  -2 -23   12.30    2.40
  -1  -2 -23   12.50    2.00
   1  -2  23   13.20    1.20
   1   2  23   12.70    1.40
   1   2  23   13.90    1.40
  -1   2 -23   12.20    3.00
  -1   2 -23   14.10    1.30
   1  -2  21    8.40    1.30
  -1  -2 -21    9.00    1.20
   1  -2  21   10.50    1.10
  -1  -2 -21   10.10    2.20
   1   2  21   10.30    1.00
  -1   2 -21    7.80    1.10
  -1   2 -21   10.80    2.40
   1   2  21    9.70    1.30
  -1  -2 -19  162.48    6.10
   1  -2  19  155.78    5.40
   1  -2  19  161.18    5.30
  -1  -2 -19  158.38    5.30
  -1   2 -19  164.58    6.30
   1   2  19  155.38    5.40
  -1   2 -19  161.08    5.30
   1   2  19  157.88    5.50
  -1  -2 -17    1.10    1.50
   1  -2  17    2.70    0.60
  -1   2 -17    1.90    1.00
  -1   2 -17    3.40    0.80
   1   2  17    1.50    0.40
   1   2  17    2.10    0.60
   1  -2  15    0.30    0.50
  -1  -2 -15    2.40    1.30
   1  -2  15    1.30    0.40
  -1  -2 -15    1.00    0.40
   1   2  15    0.60    0.40
  -1   2 -15    0.20    1.00
   1   2  15    1.30    0.50
  -1   2 -15    0.80    0.40
   1  -2  13  126.09    4.20
  -1  -2 -13  125.59    4.10
  -1  -2 -13  126.89    4.80
   1  -2  13  120.29    4.20
   1   2  13  114.59    4.60
   1   2  13  125.79    4.10
  -1   2 -13  124.79    4.00
  -1   2 -13  115.99    5.40
   1   2  13  120.99    4.00
  -1  -2 -11  207.28    6.50
  -1  -2 -11  203.48    7.10
  -1   2 -11  208.78    6.40
   1   2  11  195.18    6.90
   1   2  11  208.88    6.50
   1   2  11  208.28    6.50
  -1   2 -11  203.88    7.10
  -1   2 -11  186.28    6.50
  -1  -2  -9    1.40    0.70
   1   2   9    3.70    1.10
  -1  -2  -7   18.90    1.40
  -1  -2  -7   19.70    0.90
  -1  -2  -7   18.40    1.00
   1  -2   7   19.50    0.90
   1  -2   7   18.80    0.80
   1  -2   7   20.30    0.90
  -1  -2  -7   18.40    0.90
  -1   2  -7   18.80    1.00
   1   2   7   19.40    0.80
   1   2   7   20.00    0.90
  -1   2  -7   23.40    0.90
   1   2   7   18.70    1.30
   1   2   7   19.80    1.00
  -1  -2  -5 1384.56   42.40
   1  -2   5 1372.56   42.40
  -1  -2  -5 1364.76   42.40
  -1  -2  -5 1359.16   42.70
   1  -2   5 1629.84   42.70
  -1  -2  -5 1332.77   42.40
   1   2   5 1414.96   43.60
   1   2   5 1382.06   43.20
  -1   2  -5 1375.16   43.20
  -1   2  -5 1660.13   43.40
   1   2   5 1353.66   43.20
  -1   2  -5 1415.06   43.20
  -1  -2  -3    0.80    0.30
  -1  -2  -3    0.40    0.40
   1  -2   3    0.10    0.40
  -1  -2  -3    0.70    0.40
   1   2   3    0.70    0.40
   1   2   3    1.30    0.60
   1   2   3    0.10    0.40
   1   2   3    0.30    0.30
  -1   2  -3    0.30    0.40
   1  -2   1  212.08    6.60
  -1  -2  -1  225.58    6.70
   1  -2   1  211.38    6.60
   1  -2   1  219.08    6.60
  -1  -2  -1  219.68    6.70
  -1  -2  -1  219.98    6.70
   1   2   1  221.48    6.70
   1   2   1  223.38    6.70
  -1   2  -1  213.28    6.60
  -1   2  -1  210.28    6.60
   1  -2  -1  658.63   20.60
   1  -2  -1  691.73   20.50
  -1  -2   1  694.53   20.60
  -1  -2   1  694.93   20.60
  -1  -2   1  669.93   20.70
   1   2  -1  721.33   22.00
  -1   2   1  805.72   21.90
   1   2  -1  667.53   21.90
  -1   2   1  681.63   21.90
   1   2  -1  757.52   22.00
   1  -2  -3 5341.07  145.59
   1  -2  -3 4571.04  145.79
   1  -2  -3 4722.83  145.69
  -1  -2   3 4904.01  146.29
  -1  -2   3 4584.14  146.19
  -1  -2   3 4876.81  145.89
   1   2  -3 4719.33  150.08
  -1   2   3 5049.69  149.49
   1   2  -3 5072.29  149.79
  -1   2   3 5244.98  149.39
  -1   2   3 4829.12  149.59
   1   2  -3 4844.22  149.99
  -1  -2   5 1351.96   41.90
  -1  -2   5 1371.26   41.90
   1  -2  -5 1436.76   41.90
   1  -2  -5 1396.76   41.90
  -1   2   5 1393.36   43.30
   1   2  -5 1393.06   43.40
   1   2  -5 1394.16   43.50
   1   2  -5 1370.06   43.30
  -1   2   5 1644.94   43.70
   1  -2  -7   25.50    1.00
  -1  -2   7   25.30    1.10
  -1  -2   7   26.80    1.20
   1  -2  -7   26.70    1.00
   1  -2  -7   26.10    1.20
  -1  -2   7   25.90    1.00
   1   2  -7   25.60    1.20
  -1   2   7   26.70    1.10
  -1   2   7   26.30    0.90
   1   2  -7   25.20    1.00
  -1   2   7   26.70    1.20
  -1   2   7   25.60    1.00
   1   2  -7   25.00    1.30
   1  -2  -9  309.97    9.30
   1  -2  -9  298.87    9.30
   1  -2  -9  300.87    9.20
  -1  -2   9  305.57    9.30
   1  -2  -9  290.67    9.20
  -1  -2   9  289.77    9.20
  -1  -2   9  300.17    9.30
  -1   2   9  309.77    9.30
  -1   2   9  291.37    9.10
   1   2  -9  303.87    9.20
  -1   2   9  302.47    9.20
  -1   2   9  300.07    9.20
   1   2  -9  281.17    9.30
   1  -2 -11  114.69    3.80
   1  -2 -11  120.59    4.10
  -1  -2  11  119.29    4.00
  -1   2  11  113.79    3.70
  -1   2  11  118.79    4.00
   1  -2 -13   32.00    1.50
   1  -2 -13   28.20    1.60
  -1  -2  13   29.20    1.30
  -1  -2  13   29.00    1.60
   1   2 -13   30.90    1.40
  -1   2  13   29.30    1.50
  -1   2  13   30.40    1.30
  -1   2  13   27.80    1.40
  -1   2  13   25.70    1.30
   1  -2 -15    6.70    0.80
   1  -2 -15    6.50    1.10
  -1  -2  15    5.10    0.60
  -1  -2  15    4.70    0.90
  -1   2  15    4.70    0.90
  -1   2  15    4.40    0.60
  -1   2  15    5.20    0.80
   1   2 -15    5.60    1.30
   1   2 -15    5.40    0.70
   1  -2 -17    7.30    0.80
  -1  -2  17    7.10    0.70
   1  -2 -17    7.50    1.20
  -1  -2  17    7.90    1.00
   1   2 -17    8.40    0.80
  -1   2  17    8.50    0.90
  -1   2  17    8.40    0.80
  -1  -2  19    6.90    1.10
   1  -2 -19    4.50    1.40
   1  -2 -19    5.50    1.00
  -1  -2  19    5.60    0.80
  -1   2  19    4.80    1.00
  -1   2  19    5.50    0.80
   1   2 -19    5.40    0.90
  -1  -2  21   45.70    2.20
   1  -2 -21   44.50    2.00
   1  -2 -21   43.70    2.60
  -1  -2  21   45.70    2.00
   1   2 -21   46.60    2.00
  -1   2  21   44.40    2.20
   1   2 -21   46.80    2.80
  -1   2  21   43.40    1.90
  -1  -2  23   43.80    2.40
   1  -2 -23   48.10    2.10
   1   2 -23   46.30    3.00
   1  -2 -25   21.50    1.60
  -1  -2  25   19.50    1.40
  -1  -2  25   23.20    1.70
   1   2 -25   15.70    3.10
  -1   2  25   20.50    1.50
   1   2 -25   21.80    1.60
  -1   2  25   22.40    1.70
  -1  -2  27   27.10    2.00
   1  -2 -27   26.30    1.80
  -1  -2  27   27.40    1.70
  -1   2  27   25.50    1.90
   1   2 -27   25.70    1.70
  -1   2  27   26.60    1.70
  -1  -2  29    2.80    1.00
   1  -2 -29    1.30    1.10
  -1  -2  29    3.20    0.90
  -1   2  29    2.60    1.00
  -1   2  29    2.50    0.90
   1   2 -29    1.30    1.00
   1  -3  30   26.00    1.80
  -1  -3 -30   22.10    2.10
   1  -3  30   25.60    2.20
  -1   3 -30   13.30    1.40
   1   3  30   12.90    1.90
  -1  -3 -28    7.10    1.70
   1  -3  28    7.30    1.50
   1  -3  28    9.10    1.80
   1   3  28    8.50    1.60
  -1   3 -28   10.60    1.40
  -1   3 -28    7.10    2.90
   1   3  28   12.80    1.90
   1  -3  26   10.20    1.60
   1  -3  26   10.70    1.30
  -1  -3 -26   11.40    1.50
  -1   3 -26    8.30    2.10
   1   3  26   11.00    1.40
  -1   3 -26   10.50    1.30
   1  -3  24   10.10    1.50
  -1  -3 -24    9.50    2.60
  -1  -3 -24    9.90    1.40
   1   3  24   12.30    1.50
  -1   3 -24   11.60    3.00
   1   3  24    9.10    1.20
  -1   3 -24    8.40    1.20
  -1  -3 -22   13.80    1.60
   1  -3  22   16.70    1.50
  -1  -3 -22   12.90    2.20
  -1   3 -22   18.40    2.70
   1  -3  20   79.79    3.10
   1  -3  20   79.29    3.00
  -1  -3 -20   77.09    3.00
  -1  -3 -20   79.79    3.70
   1   3  20   76.89    2.90
  -1   3 -20   79.29    2.90
   1   3  20   77.49    3.10
  -1   3 -20   76.29    4.00
   1  -3  18   14.30    1.20
   1  -3  18   13.50    1.00
  -1  -3 -18   11.80    1.20
  -1  -3 -18   12.20    1.80
  -1   3 -18   13.20    1.10
  -1   3 -18   13.90    2.10
   1   3  18   14.30    1.20
   1   3  18   14.20    1.00
   1  -3  16   16.70    1.00
  -1  -3 -16   19.90    2.00
   1  -3  16   16.30    1.20
  -1  -3 -16   17.70    1.10
  -1   3 -16   18.00    1.70
   1   3  16   17.90    1.10
  -1   3 -16   17.70    1.10
   1   3  16   18.00    1.20
   1  -3  14   70.99    2.70
   1  -3  14   72.19    2.60
  -1  -3 -14   73.19    2.60
  -1  -3 -14   73.19    3.30
   1   3  14   73.59    2.60
   1   3  14   71.39    2.70
  -1   3 -14   73.79    2.60
  -1   3 -14   71.19    3.30
  -1  -3 -12    0.80    0.60
  -1  -3 -12    1.90    1.00
   1  -3  12    1.40    0.50
   1  -3  12    1.40    0.70
   1   3  12    1.40    0.40
  -1   3 -12    0.60    0.90
  -1   3 -12    1.60    0.50
   1   3  12    1.50    0.60
   1   3  12    1.30    0.90
   1  -3  10    1.00    0.60
  -1  -3 -10    1.50    0.80
   1  -3  10    1.50    0.60
   1   3  10    1.20    0.80
   1   3  10    1.20    0.60
  -1   3 -10    0.80    0.50
  -1   3 -10    0.80    0.80
  -1   3 -10    0.80    0.60
  -1  -3  -8    8.20    1.20
  -1  -3  -8    9.70    0.90
  -1  -3  -8    7.90    0.90
  -1  -3  -8    7.00    0.60
   1  -3   8    7.80    0.50
   1  -3   8    8.40    0.70
   1  -3   8    7.20    0.80
  -1   3  -8    7.50    0.80
   1   3   8    8.20    0.90
   1   3   8    7.00    0.70
   1   3   8    7.00    1.30
   1   3   8    8.50    0.80
  -1   3  -8    7.00    0.90
  -1   3  -8    9.00    0.70
  -1  -3  -6  301.87    9.00
  -1  -3  -6  285.97    9.00
  -1  -3  -6  277.67    9.00
   1  -3   6  301.77    8.90
   1  -3   6  289.37    8.90
  -1   3  -6  297.57    8.80
   1   3   6  293.77    8.90
  -1   3  -6  279.07    8.90
   1   3   6  288.87    9.30
   1   3   6  284.17    8.90
   1   3   6  277.57    8.80
  -1   3  -6  293.57    8.80
  -1  -3  -4   20.30    0.90
  -1  -3  -4   20.80    1.00
   1  -3   4   21.40    1.10
   1  -3   4   22.00    0.80
  -1  -3  -4   20.80    1.00
   1  -3   4   23.50    0.90
   1   3   4   21.40    1.40
  -1   3  -4   23.00    0.90
   1   3   4   21.70    1.00
  -1   3  -4   24.40    0.90
  -1   3  -4   21.70    1.00
   1   3   4   21.10    1.00
   1   3   4   20.50    0.90
  -1  -3  -2  556.44   17.30
  -1  -3  -2  588.84   17.30
   1  -3   2  578.64   17.30
   1  -3   2  556.14   17.20
  -1  -3  -2  577.24   17.30
   1  -3   2  568.34   17.20
   1   3   2  562.14   17.20
   1   3   2  562.24   17.20
  -1   3  -2  594.94   17.20
  -1   3  -2  552.74   17.10
  -1   3  -2  568.14   17.10
  -1  -3   0 1000.20   29.80
  -1  -3   0  983.70   29.80
   1  -3   0  976.80   29.70
   1  -3   0  985.20   29.70
   1   3   0  984.00   29.60
  -1   3   0  987.10   29.60
   1   3   0  971.00   29.60
   1  -3  -2  706.03   21.20
   1  -3  -2  698.13   21.20
   1  -3  -2  704.23   21.20
  -1  -3   2  698.93   21.30
  -1  -3   2  694.93   21.30
  -1  -3   2  707.93   21.20
  -1   3   2  689.23   21.10
  -1   3   2  695.23   21.10
   1   3  -2  705.93   21.20
   1   3  -2  687.73   21.20
   1   3  -2  718.43   21.20
   1  -3  -4  136.89    4.20
  -1  -3   4  139.39    4.40
  -1  -3   4  132.99    4.30
   1  -3  -4  132.09    4.20
  -1  -3   4  132.79    4.30
   1  -3  -4  138.69    4.20
   1   3  -4  131.79    4.20
   1   3  -4  139.19    4.40
  -1   3   4  134.69    4.10
  -1   3   4  131.39    4.20
   1   3  -4  136.19    4.40
  -1   3   4  136.19    4.20
  -1  -3   6  631.44   19.30
  -1  -3   6  627.44   19.20
  -1  -3   6  629.94   19.30
   1  -3  -6  650.73   19.30
   1  -3  -6  631.24   19.20
   1  -3  -6  625.64   19.20
   1   3  -6  651.63   19.20
  -1   3   6  635.04   19.00
  -1   3   6  621.44   19.00
   1   3  -6  629.94   19.00
   1   3  -6  613.44   19.20
  -1   3   6  616.24   19.00
   1  -3  -8    0.00    0.30
   1  -3  -8    0.10    0.50
  -1  -3   8    0.50    0.40
   1  -3  -8    0.10    0.40
  -1  -3   8    0.20    0.50
  -1  -3   8    0.20    0.40
  -1   3   8    0.30    0.50
  -1   3   8    0.30    0.40
   1   3  -8   -0.30    0.60
  -1   3   8    0.10    0.30
   1   3  -8    0.10    0.40
  -1   3   8    0.40    0.30
   1   3  -8    0.60    0.60
  -1  -3  10  118.19    4.10
   1  -3 -10  114.59    4.00
  -1  -3  10  117.79    4.00
   1  -3 -10  121.09    3.80
  -1   3  10  123.29    3.90
  -1   3  10  123.99    4.10
   1   3 -10  106.09    4.30
  -1   3  10  121.59    4.00
  -1   3  10  117.29    3.80
  -1  -3  12   79.09    2.80
   1  -3 -12   74.69    2.70
  -1   3  12   74.99    2.90
  -1   3  12   69.69    2.50
  -1   3  12   74.49    2.70
  -1   3  12   74.49    2.60
   1   3 -12   75.79    2.60
  -1  -3  14   35.50    1.70
  -1  -3  14   36.10    1.50
   1  -3 -14   37.70    1.50
  -1   3  14   36.10    1.80
  -1   3  14   39.20    1.50
  -1   3  14   36.60    1.70
   1   3 -14   37.30    1.60
   1  -3 -16   34.90    1.70
  -1  -3  16   34.70    1.70
  -1  -3  16   34.60    1.50
   1  -3 -16   35.30    1.50
  -1   3  16   35.50    1.60
  -1   3  16   35.30    1.50
   1   3 -16   35.20    1.50
  -1   3  16   32.20    1.70
  -1  -3  18   19.30    1.10
   1  -3 -18   17.70    1.50
  -1  -3  18   20.80    1.40
   1  -3 -18   18.00    1.20
  -1   3  18   19.80    1.30
   1   3 -18   20.70    1.20
  -1   3  18   19.90    1.10
   1   3 -18   22.60    1.80
  -1   3  18   16.70    1.20
   1  -3 -20    7.40    1.10
  -1  -3  20    5.10    0.90
   1  -3 -20    7.90    1.50
  -1  -3  20    7.50    1.20
  -1   3  20    7.90    0.90
  -1   3  20    6.70    1.10
   1   3 -20    6.20    1.90
   1   3 -20    8.90    1.00
   1  -3 -22    2.80    1.10
   1  -3 -22    2.80    0.70
  -1   3  22    4.00    0.90
   1   3 -22    2.50    0.70
  -1   3  22    2.30    0.70
  -1  -3  24   20.20    1.60
  -1  -3  24   17.60    1.30
   1   3 -24   18.70    3.00
  -1   3  24   19.70    1.70
  -1   3  24   22.30    1.40
   1   3 -24   19.10    1.40
   1  -3 -26    7.00    1.40
  -1  -3  26   10.60    1.40
  -1   3  26    8.50    1.40
   1   3 -26   10.60    1.40
   1   3 -26    9.40    3.50
  -1   3  26   13.20    1.30
   1  -3 -28   15.10    1.70
  -1  -3  28   15.90    1.80
  -1  -3  28   13.80    1.60
  -1   3  28   15.10    1.60
  -1   3  28   16.10    1.80
   1   3 -28   12.30    1.60
  -1  -3  30   20.00    1.90
   1  -3 -30   24.10    2.10
  -1  -3  30   29.20    2.20
  -1   3  30   25.20    2.10
   1   3 -30   20.70    1.80
  -1   3  30   22.80    1.90
  -1  -4 -29   -1.70    1.20
   1  -4  29    1.70    1.10
  -1   4 -29    2.20    0.90
   1   4  29    3.10    1.00
   1  -4  27    1.00    0.90
   1  -4  27    1.10    0.90
  -1  -4 -27    1.10    1.00
   1   4  27    1.60    0.90
   1   4  27    0.00    0.90
  -1   4 -27    0.60    0.80
  -1  -4 -25    1.80    0.90
   1  -4  25    1.50    0.80
   1  -4  25    2.60    0.70
  -1   4 -25    3.50    2.00
   1   4  25    1.30    0.80
   1   4  25    1.30    0.90
  -1   4 -25    1.60    0.70
   1  -4  23   69.79    2.80
  -1  -4 -23   68.39    2.90
  -1  -4 -23   65.09    3.40
   1  -4  23   70.49    3.10
   1   4  23   67.59    3.00
  -1   4 -23   71.69    2.80
  -1   4 -23   69.79    4.20
   1   4  23   64.29    2.80
  -1  -4 -21   13.50    2.00
   1  -4  21   14.40    1.40
  -1  -4 -21   13.80    1.40
   1  -4  21   11.90    1.10
   1   4  21   12.90    1.40
   1   4  21   11.50    1.30
  -1   4 -21   13.50    2.60
   1  -4  19    1.30    0.50
   1  -4  19    1.10    0.60
  -1  -4 -19    1.30    1.00
  -1  -4 -19    0.50    0.70
  -1   4 -19    1.30    1.10
  -1   4 -19    0.70    0.60
   1   4  19    0.00    0.50
   1   4  19    1.20    0.70
   1  -4  17   33.50    1.70
  -1  -4 -17   33.80    1.70
  -1  -4 -17   33.40    2.30
   1  -4  17   34.10    1.60
   1   4  17   35.00    1.70
  -1   4 -17   32.60    2.40
   1   4  17   32.40    1.60
  -1   4 -17   34.20    1.50
  -1  -4 -15   23.50    1.30
   1  -4  15   22.00    1.30
  -1  -4 -15   26.80    2.10
   1  -4  15   23.80    1.20
  -1   4 -15   24.40    1.20
   1   4  15   23.50    1.20
  -1   4 -15   25.90    1.90
   1   4  15   24.80    1.40
   1  -4  13   15.40    1.10
   1  -4  13   16.00    1.00
  -1  -4 -13   13.80    1.90
  -1  -4 -13   19.30    1.20
  -1   4 -13   16.60    1.00
   1   4  13   16.70    1.10
   1   4  13   18.20    1.00
   1  -4  11    3.90    1.00
  -1  -4 -11    2.60    0.70
  -1   4 -11    4.20    0.80
   1   4  11    4.40    1.10
   1   4  11    4.50    0.70
   1   4  11    3.10    0.90
  -1  -4  -9    5.20    0.90
   1  -4   9    4.80    0.90
   1  -4   9    4.30    0.90
   1   4   9    4.50    0.70
  -1   4  -9    3.70    0.80
   1   4   9    5.00    1.50
  -1   4  -9    4.10    1.10
  -1   4  -9    5.30    0.90
   1   4   9    6.50    1.00
   1   4   9    4.20    0.80
   1  -4   7  169.88    5.60
  -1  -4  -7  177.98    5.60
  -1  -4  -7  181.98    5.70
   1  -4   7  182.78    5.80
  -1  -4  -7  171.28    5.80
   1  -4   7  184.28    5.60
   1   4   7  186.88    5.80
  -1   4  -7  185.08    5.90
   1   4   7  173.28    5.70
  -1   4  -7  178.78    5.80
   1   4   7  186.68    5.80
   1   4   7  182.98    6.30
  -1   4  -7  182.68    5.70
   1  -4   5  478.35   14.60
  -1  -4  -5  493.55   14.70
   1  -4   5  489.85   14.70
  -1  -4  -5  483.95   14.60
   1  -4   5  464.75   14.60
  -1  -4  -5  467.15   14.70
  -1   4  -5  484.65   14.70
  -1   4  -5  469.35   14.60
  -1   4  -5  466.95   14.50
   1   4   5  504.45   15.10
   1   4   5  481.45   14.70
   1   4   5  464.55   14.60
   1   4   5  486.05   14.70
   1  -4   3   19.40    1.40
   1  -4   3   19.70    0.80
  -1  -4  -3   19.50    0.90
  -1  -4  -3   18.40    1.00
  -1  -4  -3   20.30    0.90
   1   4   3   19.60    1.00
  -1   4  -3   19.30    1.00
   1   4   3   19.80    0.90
  -1   4  -3   22.30    0.80
   1   4   3   18.90    1.00
  -1  -4  -1  510.15   15.40
   1  -4   1  521.25   15.50
  -1  -4  -1  504.95   15.50
   1  -4   1  489.85   15.40
  -1  -4  -1  512.45   15.50
   1   4   1  512.85   15.60
  -1   4  -1  499.45   15.40
  -1   4  -1  521.75   15.50
   1   4   1  509.45   15.60
  -1  -4   1   46.00    1.70
  -1  -4   1   47.10    1.80
   1  -4  -1   46.20    1.60
   1  -4  -1   45.60    1.60
  -1  -4   1   46.20    1.80
  -1   4   1   47.10    1.60
  -1   4   1   47.20    1.60
   1   4  -1   46.10    1.60
   1   4  -1   44.80    1.80
   1  -4  -3  198.48    6.40
  -1  -4   3  208.48    6.50
   1  -4  -3  213.08    6.30
   1  -4  -3  208.18    6.40
  -1  -4   3  202.38    6.40
  -1  -4   3  204.88    6.50
   1   4  -3  210.88    6.60
  -1   4   3  209.38    6.40
   1   4  -3  212.78    6.60
  -1   4   3  203.98    6.30
  -1   4   3  203.08    6.40
   1   4  -3  209.78    6.50
  -1  -4   5   51.89    2.10
   1  -4  -5   49.70    1.90
   1  -4  -5   60.69    1.90
   1  -4  -5   58.59    1.90
  -1  -4   5   57.89    2.10
  -1  -4   5   57.09    2.00
   1   4  -5   53.79    1.90
  -1   4   5   59.29    1.80
   1   4  -5   53.49    2.10
   1   4  -5   52.29    2.10
  -1   4   5   54.79    1.90
  -1   4   5   59.69    1.90
  -1  -4   7  212.48    7.20
  -1  -4   7  234.98    7.30
   1  -4  -7  224.18    7.20
   1  -4  -7  238.98    7.20
  -1  -4   7  238.08    7.40
   1  -4  -7  234.28    7.20
  -1   4   7  230.98    7.20
  -1   4   7  230.68    7.20
  -1   4   7  232.18    7.10
   1   4  -7  228.08    7.40
   1   4  -7  227.58    7.40
   1   4  -7  237.38    7.20
   1  -4  -9   16.80    1.10
  -1  -4   9   17.40    1.30
   1  -4  -9   17.30    1.30
   1   4  -9   15.60    1.40
  -1   4   9   16.60    0.90
  -1   4   9   15.80    1.30
  -1   4   9   17.30    1.10
  -1   4   9   17.20    1.10
   1   4  -9   16.50    1.10
  -1  -4  11   60.39    2.40
  -1  -4  11   59.49    2.30
   1  -4 -11   60.59    2.30
  -1   4  11   60.59    2.20
  -1   4  11   58.89    2.50
  -1   4  11   57.59    2.00
   1   4 -11   57.99    2.20
   1  -4 -13    0.30    0.60
  -1  -4  13    0.20    0.50
  -1  -4  13    0.10    0.30
  -1   4  13    0.50    0.40
   1   4 -13    0.30    0.50
  -1   4  13   -0.10    0.30
  -1   4  13   -0.90    0.70
  -1   4  13    0.30    0.50
  -1  -4  15   54.69    2.30
  -1  -4  15   59.59    2.20
   1  -4 -15   58.99    2.20
   1   4 -15   55.39    2.10
  -1   4  15   52.19    2.50
  -1   4  15   56.49    2.10
  -1   4  15   56.69    2.20
  -1  -4  17   55.19    2.20
  -1  -4  17   55.99    2.30
   1  -4 -17   56.19    2.20
  -1   4  17   53.49    2.50
  -1   4  17   55.69    2.20
  -1   4  17   55.89    2.20
   1   4 -17   56.29    2.20
  -1  -4  19    0.10    0.60
  -1  -4  19    0.30    0.50
   1   4 -19    0.20    0.60
  -1   4  19   -0.10    0.60
  -1   4  19    0.80    1.10
  -1  -4  21   38.70    2.00
   1  -4 -21   35.90    1.90
  -1  -4  21   34.80    1.70
   1   4 -21   36.80    1.70
  -1   4  21   36.30    1.80
  -1   4  21   35.90    1.90
   1   4 -21   37.60    2.50
   1  -4 -23    6.80    1.20
  -1  -4  23    9.70    1.10
  -1  -4  23   11.10    1.50
  -1   4  23    8.10    1.30
   1   4 -23    8.00    1.20
  -1   4  23   10.40    1.20
   1   4 -23    5.10    1.60
  -1  -4  25   17.40    1.60
  -1  -4  25   14.20    1.40
   1  -4 -25   14.60    1.50
  -1   4  25   14.20    1.40
   1   4 -25   12.60    1.40
   1   4 -25   13.60    3.20
  -1   4  25   18.20    1.60
  -1  -4  27   14.60    1.50
  -1  -4  27   15.60    1.70
   1  -4 -27   14.00    1.70
   1   4 -27   13.60    1.40
  -1   4  27   15.80    1.70
  -1   4  27   19.30    1.60
  -1  -4  29   31.70    2.10
  -1  -4  29   33.90    2.30
  -1   4  29   31.80    2.10
   1   4 -29   31.70    2.00
  -1   4  29   32.60    2.20
  -1  -5 -28    0.30    1.30
   1  -5  28    1.00    1.00
   1  -5  28    0.60    1.00
   1   5  28    1.00    1.00
   1   5  28    0.80    1.10
  -1   5 -28    1.80    0.90
  -1   5 -28    2.30    2.70
   1  -5  26    2.60    0.90
   1  -5  26    2.40    0.90
  -1  -5 -26    1.70    1.10
  -1   5 -26    2.10    0.80
   1   5  26    2.00    0.80
   1   5  26    3.70    0.90
  -1   5 -26    2.50    2.80
  -1  -5 -24    5.10    1.00
   1  -5  24    3.40    0.70
   1  -5  24    6.20    1.40
  -1   5 -24    5.50    1.20
   1   5  24    8.00    1.40
   1   5  24    7.00    1.30
  -1   5 -24    6.50    2.10
   1  -5  22    9.90    1.30
   1  -5  22   10.30    1.30
  -1   5 -22   10.90    1.20
   1   5  22    8.70    1.10
  -1   5 -22    6.00    1.80
   1  -5  20   11.30    1.30
  -1  -5 -20   10.20    1.40
   1  -5  20   11.70    1.20
  -1   5 -20   12.00    1.10
   1   5  20   10.70    1.30
  -1   5 -20   13.80    2.40
   1   5  20   12.00    1.00
  -1  -5 -18  104.79    3.90
   1  -5  18  106.49    3.90
   1  -5  18  108.29    3.80
   1   5  18  104.29    3.90
  -1   5 -18  105.29    3.70
   1   5  18  104.59    3.80
  -1   5 -18  107.59    4.60
  -1  -5 -16   36.60    1.80
   1  -5  16   37.30    1.80
   1  -5  16   37.20    1.70
  -1   5 -16   37.10    1.60
  -1   5 -16   37.20    2.40
   1   5  16   37.00    1.70
   1   5  16   35.10    1.70
   1  -5  14  258.77    8.20
  -1  -5 -14  258.47    8.30
   1  -5  14  262.17    8.30
   1   5  14  257.17    8.20
   1   5  14  259.97    8.20
  -1   5 -14  255.17    8.10
   1  -5  12   50.99    2.00
   1  -5  12   49.50    2.00
  -1  -5 -12   50.89    2.10
   1   5  12   49.30    1.90
  -1   5 -12   49.10    1.80
   1   5  12   49.99    2.00
  -1  -5 -10    9.00    1.10
   1  -5  10    9.50    1.10
  -1   5 -10    7.60    1.00
   1   5  10    7.80    1.10
   1  -5   8    9.70    1.40
  -1   5  -8    6.50    1.20
   1   5   8    8.20    1.00
   1   5   8    7.40    1.30
   1  -5   6  275.37    8.40
  -1  -5  -6  273.57    8.60
   1  -5   6  276.77    8.60
  -1  -5  -6  269.67    8.50
   1   5   6  263.47    8.30
  -1   5  -6  270.97    8.20
   1   5   6  274.17    8.30
  -1   5  -6  262.87    8.40
  -1   5  -6  269.07    8.20
   1   5   6  252.57    8.90
  -1  -5  -4    9.30    1.00
   1  -5   4    8.50    1.00
  -1  -5  -4    8.30    0.80
  -1  -5  -4    8.70    0.70
   1  -5   4   10.20    0.60
   1  -5   4    9.10    0.70
   1   5   4    9.20    0.90
  -1   5  -4    9.70    0.70
  -1   5  -4   10.70    0.90
   1   5   4    9.70    0.80
  -1   5  -4    9.70    0.70
   1   5   4    8.90    0.90
   1  -5   2    4.40    0.80
  -1  -5  -2    4.30    0.60
  -1  -5  -2    4.70    0.80
  -1  -5  -2    4.40    0.60
   1  -5   2    4.00    0.60
   1   5   2    4.00    0.70
  -1   5  -2    4.70    0.50
  -1   5  -2    5.30    0.70
   1   5   2    5.20    0.70
   1  -5   0    1.80    0.40
  -1  -5   0    2.50    0.70
   1  -5   0    1.90    0.40
  -1  -5   0    1.40    0.50
  -1  -5   0    2.80    0.60
   1   5   0    1.40    0.50
  -1   5   0    1.70    0.40
  -1   5   0    2.20    0.60
   1   5   0    2.40    0.60
  -1  -5   2   17.70    0.90
  -1  -5   2   17.40    1.10
   1  -5  -2   17.50    0.90
   1  -5  -2   16.60    0.80
  -1  -5   2   17.20    1.00
  -1   5   2   18.00    0.80
   1   5  -2   17.50    0.90
   1   5  -2   18.30    1.00
  -1   5   2   18.10    0.80
  -1  -5   4    5.20    0.80
  -1  -5   4    5.00    0.60
   1  -5  -4    6.00    0.60
  -1  -5   4    4.30    1.00
   1  -5  -4    5.10    0.60
   1  -5  -4    5.70    0.70
  -1   5   4    5.30    0.50
   1   5  -4    4.40    0.90
   1   5  -4    5.00    1.00
  -1   5   4    5.60    0.60
  -1   5   4    4.40    0.60
   1   5  -4    4.40    0.70
   1  -5  -6   10.80    0.70
  -1  -5   6   12.70    1.50
   1  -5  -6   15.10    1.00
  -1   5   6   14.40    0.90
  -1   5   6   15.70    0.80
   1   5  -6   13.20    1.20
  -1   5   6   14.20    1.00
   1   5  -6   16.10    1.40
   1  -5  -8  329.57   10.20
   1  -5  -8  328.47   10.20
  -1  -5   8  325.87   10.40
  -1  -5   8  330.87   10.30
  -1   5   8  313.27    9.80
  -1   5   8  322.97    9.90
   1   5  -8  332.67    9.90
  -1   5   8  325.27   10.10
   1   5  -8  311.67   10.10
  -1  -5  10  228.48    7.80
   1  -5 -10  252.07    7.60
   1  -5 -10  240.38    7.60
  -1   5  10  249.48    7.70
  -1   5  10  239.48    7.70
  -1   5  10  244.28    7.60
   1   5 -10  246.98    7.60
  -1   5  10  240.98    8.00
  -1  -5  12   24.50    1.40
  -1  -5  12   23.80    1.20
   1  -5 -12   26.60    1.40
  -1   5  12   23.80    1.30
  -1   5  12   23.50    1.60
   1   5 -12   24.60    1.20
  -1   5  12   22.80    1.10
  -1   5  12   23.70    1.10
  -1  -5  14   17.80    1.00
   1  -5 -14   14.90    1.00
  -1   5  14   15.80    0.90
   1   5 -14   16.80    1.00
  -1   5  14   13.60    1.50
  -1   5  14   14.80    1.00
   1  -5 -16  106.29    3.60
  -1  -5  16   99.29    3.70
  -1  -5  16  103.89    3.60
  -1   5  16  102.19    3.60
  -1   5  16  104.19    3.50
  -1   5  16   95.79    3.90
   1   5 -16  103.79    3.50
   1  -5 -18  203.08    6.60
  -1  -5  18  204.08    6.70
  -1  -5  18  202.88    6.70
   1   5 -18  200.38    6.50
  -1   5  18  198.48    6.70
  -1   5  18  205.58    6.60
  -1  -5  20   10.40    1.30
  -1  -5  20    9.40    1.10
   1  -5 -20   12.00    1.20
   1   5 -20    9.40    2.10
   1   5 -20   11.30    1.10
  -1   5  20   10.90    1.00
  -1   5  20   11.50    1.30
   1  -5 -22    4.00    0.80
  -1  -5  22    3.80    1.00
  -1  -5  22    3.00    1.00
   1   5 -22    7.20    2.20
  -1   5  22    3.40    0.80
   1   5 -22    5.00    1.20
  -1  -5  24    5.40    1.20
   1  -5 -24    4.90    1.30
  -1  -5  24    7.90    1.50
  -1   5  24    5.50    1.30
   1   5 -24    6.50    1.10
  -1   5  24    6.80    1.30
  -1  -5  26    4.70    1.20
  -1  -5  26    3.50    0.90
   1  -5 -26    3.00    0.90
   1   5 -26    1.30    0.80
   1   5 -26    2.10    2.10
  -1   5  26    3.70    0.80
  -1   5  26    2.40    0.90
  -1  -5  28   18.10    1.80
  -1  -5  28   18.00    1.90
   1  -5 -28   17.90    1.90
  -1   5  28   20.10    1.80
  -1   5  28   16.30    1.80
   1   5 -28   13.20    1.50
  -1  -6 -27   11.10    2.10
   1  -6  27   14.50    1.90
   1  -6  27   15.40    1.60
  -1   6 -27   10.80    2.70
   1   6  27   10.90    2.00
  -1   6 -27    8.60    1.40
   1   6  27   11.00    1.70
   1  -6  25    5.30    1.30
   1  -6  25    7.70    1.50
  -1   6 -25    2.60    0.80
   1   6  25    2.00    0.90
  -1   6 -25    7.10    2.30
   1   6  25    2.50    0.80
  -1  -6 -23    8.60    1.60
   1  -6  23    8.10    1.30
   1  -6  23   11.00    1.50
  -1   6 -23    9.60    1.20
   1   6  23    8.20    1.30
  -1   6 -23   14.30    3.10
   1   6  23    9.70    1.50
   1  -6  21    9.30    1.40
   1   6  21    5.40    1.10
   1   6  21    6.40    1.70
  -1   6 -21    5.40    1.10
  -1   6 -21    8.90    2.40
  -1  -6 -19  132.79    4.70
   1  -6  19  131.19    4.60
   1  -6  19  129.19    4.60
   1   6  19  128.89    4.60
  -1   6 -19  130.59    4.40
   1   6  19  131.19    4.70
  -1   6 -19  131.49    5.60
   1  -6  17    2.20    0.60
  -1  -6 -17    2.10    0.80
  -1   6 -17    4.00    0.90
   1  -6  15  206.98    6.70
   1  -6  15  209.28    6.80
  -1  -6 -15  206.18    6.80
  -1   6 -15  208.38    6.60
   1   6  15  208.78    6.80
   1   6  15  206.28    6.80
   1  -6  13    0.20    0.40
  -1  -6 -13    0.30    0.50
   1   6  13    0.60    0.40
  -1   6 -13    1.20    0.40
   1   6  13    0.60    0.40
   1  -6  11   12.90    0.90
  -1  -6 -11   13.60    1.10
   1   6  11   14.50    1.00
   1   6  11   12.90    0.90
  -1   6 -11   12.90    0.80
  -1  -6  -9  120.49    4.10
   1  -6   9  119.69    4.20
   1  -6   9  116.59    3.90
  -1   6  -9  110.69    3.90
   1   6   9  118.49    3.90
  -1   6  -9  110.09    4.10
  -1   6  -9  116.89    3.70
  -1  -6  -7  201.08    6.30
   1  -6   7  188.78    6.30
   1  -6   7  193.18    6.00
  -1  -6  -7  185.18    6.10
  -1   6  -7  181.28    6.00
   1   6   7  193.78    6.10
   1   6   7  200.98    6.10
  -1   6  -7  183.38    6.20
  -1   6  -7  191.28    6.00
   1  -6   5    3.90    0.60
  -1  -6  -5    3.70    0.80
  -1  -6  -5    4.30    1.10
   1  -6   5    3.90    0.80
   1   6   5    4.80    1.00
   1   6   5    4.60    1.00
  -1   6  -5    6.30    0.90
   1   6   5    4.20    0.90
  -1   6  -5    5.00    1.10
   1  -6   3   48.70    2.00
  -1  -6  -3   50.99    1.90
  -1  -6  -3   49.80    2.20
  -1   6  -3   49.70    2.00
  -1   6  -3   51.89    1.90
   1   6   3   48.90    2.00
   1   6   3   50.89    2.00
   1  -6   1   25.80    1.40
  -1  -6  -1   25.70    1.30
   1  -6   1   25.10    1.10
  -1  -6  -1   26.90    1.60
   1   6   1   25.00    1.40
  -1   6  -1   24.50    1.20
  -1   6  -1   26.30    1.30
  -1  -6   1    2.00    0.60
   1  -6  -1    1.10    0.40
  -1  -6   1    2.10    0.80
   1  -6  -1    1.90    0.60
  -1   6   1    1.60    0.50
   1   6  -1    1.40    0.70
  -1   6   1    0.80    0.50
  -1  -6   3   17.90    1.50
   1  -6  -3   18.30    1.20
  -1  -6   3   20.70    1.20
   1  -6  -3   20.90    1.10
  -1   6   3   19.60    1.10
   1   6  -3   20.40    1.20
   1   6  -3   18.10    1.20
   1   6  -3   18.00    1.40
  -1   6   3   20.60    1.00
   1  -6  -5   26.60    1.40
  -1  -6   5   25.80    1.40
   1  -6  -5   27.10    1.20
   1   6  -5   25.50    1.30
  -1   6   5   25.10    1.30
   1   6  -5   24.50    1.70
   1   6  -5   24.50    1.60
  -1   6   5   25.50    1.20
  -1   6   5   27.00    1.10
   1  -6  -7  122.39    4.00
  -1  -6   7  116.09    4.30
   1  -6  -7  119.29    3.90
  -1  -6   7  122.19    4.00
   1   6  -7  116.59    4.10
  -1   6   7  113.79    4.00
   1   6  -7  118.69    3.90
  -1   6   7  115.29    3.80
  -1   6   7  120.89    3.80
  -1  -6   9    4.40    1.00
   1  -6  -9    2.20    0.60
  -1  -6   9    2.70    0.70
   1  -6  -9    1.20    0.60
   1   6  -9    1.30    0.70
  -1   6   9    1.10    0.40
  -1   6   9    1.90    0.50
  -1   6   9    3.10    0.60
   1   6  -9    2.20    0.50
   1  -6 -11   60.19    2.40
  -1  -6  11   60.79    2.40
   1   6 -11   61.89    2.20
  -1   6  11   55.69    2.60
  -1   6  11   58.29    2.40
  -1   6  11   58.09    2.10
  -1   6  11   61.49    2.20
   1  -6 -13   20.40    1.20
  -1  -6  13   20.70    1.20
  -1  -6  13   20.50    1.20
  -1   6  13   19.90    1.00
   1   6 -13   19.00    1.10
  -1   6  13   17.80    1.60
  -1   6  13   19.40    1.00
  -1  -6  15   15.00    1.00
  -1  -6  15   13.90    1.20
   1  -6 -15   14.70    1.10
  -1   6  15   13.40    1.00
  -1   6  15   14.30    0.90
   1   6 -15   12.90    1.00
  -1  -6  17  124.09    4.30
   1  -6 -17  121.79    4.30
  -1  -6  17  123.99    4.30
  -1   6  17  118.59    4.00
  -1   6  17   96.29    4.70
  -1   6  17  123.79    4.00
   1   6 -17  120.59    4.00
  -1  -6  19   31.30    1.80
   1  -6 -19   31.20    1.70
  -1  -6  19   30.70    1.60
  -1   6  19   31.10    1.70
  -1   6  19   31.00    1.60
   1   6 -19   32.10    1.70
   1  -6 -21   25.90    1.70
  -1  -6  21   27.00    1.50
  -1  -6  21   26.20    1.70
   1   6 -21   25.40    1.50
  -1   6  21   26.10    1.60
  -1  -6  23    2.60    0.70
  -1  -6  23    3.30    0.80
  -1   6  23    2.20    0.80
  -1   6  23    2.20    0.70
   1   6 -23    1.10    0.80
   1   6 -23    3.80    1.60
   1  -6 -25    1.50    1.00
  -1  -6  25    2.60    0.80
  -1  -6  25    2.00    0.90
   1   6 -25    4.70    2.10
  -1   6  25    2.40    0.80
   1   6 -25    0.70    0.80
  -1  -6  27    6.20    1.70
   1  -6 -27    3.70    1.20
  -1  -6  27    2.40    0.80
  -1   6  27    4.50    1.00
  -1   6  27    1.70    0.90
   1   6 -27    3.20    0.90
  -1  -6  29    3.30    1.10
   1  -6 -29    1.40    1.30
  -1   6  29    1.90    1.10
   1  -7  26    3.20    1.00
   1  -7  26    2.80    0.90
  -1  -7 -26    2.10    1.20
   1   7  26    2.80    1.00
  -1   7 -26    5.60    2.60
   1   7  26    2.40    1.00
   1  -7  24    6.60    1.30
  -1  -7 -24    7.30    1.80
  -1   7 -24    9.70    1.30
   1   7  24    8.40    1.70
  -1   7 -24    6.60    2.30
   1   7  24    7.20    1.50
  -1  -7 -22    3.80    1.00
   1  -7  22    5.20    1.20
  -1   7 -22    2.20    0.70
   1   7  22    4.70    1.20
   1   7  22    3.40    0.80
   1  -7  20   11.50    1.30
  -1   7 -20   11.00    1.10
   1   7  20    9.40    1.20
   1   7  20   10.00    1.40
  -1   7 -20   13.90    2.70
  -1  -7 -18    7.20    1.40
   1  -7  18    6.60    1.20
   1  -7  18    9.30    1.10
   1   7  18    7.80    1.20
   1   7  18    8.50    1.00
  -1   7 -18    8.50    1.00
   1  -7  16    7.40    0.90
   1  -7  16    8.00    1.10
  -1  -7 -16    9.70    1.20
   1   7  16    8.50    1.00
  -1   7 -16    8.40    0.90
   1   7  16    8.40    1.10
   1  -7  14    2.10    0.50
  -1  -7 -14    1.00    0.70
   1  -7  14    1.60    0.50
   1   7  14    1.10    0.50
  -1   7 -14    3.70    0.80
   1   7  14    2.10    0.50
   1  -7  12   10.20    0.90
  -1  -7 -12    8.70    1.10
  -1   7 -12    9.90    0.80
   1   7  12    9.20    1.00
   1   7  12   10.50    0.90
  -1  -7 -10    7.80    1.00
   1  -7  10    6.60    1.10
   1  -7  10    8.10    0.80
   1   7  10    7.60    0.80
   1   7  10    8.40    1.00
  -1   7 -10    8.20    0.70
  -1  -7  -8    2.80    0.70
   1  -7   8    3.10    0.80
   1  -7   8    2.90    0.60
  -1  -7  -8    4.00    0.90
   1   7   8    2.90    0.60
  -1   7  -8    3.20    0.60
  -1   7  -8    2.60    0.60
   1   7   8    2.60    0.60
  -1   7  -8    4.10    1.10
   1  -7   6   60.59    2.90
   1  -7   6   63.99    2.10
  -1  -7  -6   66.49    2.60
  -1  -7  -6   61.59    2.20
  -1   7  -6   65.39    2.30
   1   7   6   66.79    2.40
  -1   7  -6   63.29    2.50
   1   7   6   63.89    2.40
  -1   7  -6   64.89    2.30
  -1  -7  -4   17.50    1.00
   1  -7   4   16.80    1.40
  -1  -7  -4   18.30    1.50
  -1   7  -4   16.20    1.20
  -1   7  -4   17.90    1.00
   1   7   4   18.00    1.10
   1  -7   2    1.70    0.70
  -1  -7  -2    3.00    0.80
   1   7   2    1.20    0.50
  -1   7  -2    1.70    0.50
  -1   7  -2    2.20    0.60
   1   7   2    1.80    0.60
  -1  -7   0    6.20    1.10
   1  -7   0    8.00    1.10
  -1  -7   0    7.40    0.90
   1   7   0    7.70    0.90
  -1   7   0    8.10    0.90
   1   7   0    6.50    0.90
   1  -7  -2    1.20    0.60
  -1  -7   2    0.90    0.80
  -1  -7   2    0.90    0.60
   1   7  -2    1.10    0.50
  -1   7   2    2.30    0.50
   1  -7  -4   56.59    2.30
  -1  -7   4   60.09    2.50
   1  -7  -4   59.89    2.00
  -1  -7   4   58.89    2.20
  -1   7   4   58.79    2.10
  -1   7   4   56.09    2.30
   1   7  -4   56.89    2.20
  -1   7   4   58.79    2.00
   1   7  -4   58.49    2.20
   1  -7  -6   35.80    1.40
  -1  -7   6   37.50    1.60
   1  -7  -6   37.80    1.70
  -1  -7   6   34.60    1.80
  -1   7   6   37.60    1.40
  -1   7   6   35.40    1.50
   1   7  -6   34.10    1.80
   1   7  -6   36.70    1.50
  -1   7   6   32.90    1.40
   1  -7  -8   59.59    2.30
   1  -7  -8   63.79    2.40
  -1  -7   8   62.59    2.50
  -1  -7   8   63.79    2.40
   1   7  -8   59.69    2.50
  -1   7   8   62.29    2.20
  -1   7   8   62.09    2.20
  -1   7   8   57.29    2.10
   1   7  -8   63.09    2.20
   1  -7 -10   59.89    2.40
   1  -7 -10   56.09    2.30
  -1  -7  10   58.99    2.50
   1   7 -10   58.89    2.20
  -1   7  10   59.69    2.20
  -1   7  10   59.59    2.10
  -1   7  10   56.69    2.10
  -1  -7  12    5.90    0.80
   1  -7 -12    6.00    0.90
   1   7 -12    5.40    0.70
  -1   7  12    6.80    0.70
  -1   7  12    5.60    0.80
   1  -7 -14    9.90    1.10
  -1  -7  14   10.90    1.00
  -1  -7  14   11.60    1.00
   1   7 -14    8.30    1.00
  -1   7  14    9.80    0.80
  -1   7  14    9.60    0.90
   1  -7 -16    2.50    0.70
  -1  -7  16    3.30    0.70
  -1  -7  16    2.60    0.60
   1   7 -16    2.10    0.60
  -1   7  16    1.90    0.50
  -1   7  16    2.50    0.60
  -1  -7  18   41.80    2.00
  -1  -7  18   42.80    2.00
   1  -7 -18   42.90    2.10
  -1   7  18   43.60    1.90
  -1   7  18   41.60    1.90
   1   7 -18   42.00    1.80
  -1  -7  20   44.50    2.20
  -1  -7  20   43.30    2.20
   1  -7 -20   43.40    2.20
  -1   7  20   44.50    2.00
   1   7 -20   42.90    2.00
  -1   7  20   43.60    2.10
   1  -7 -22   13.00    1.90
  -1  -7  22   11.50    1.30
  -1   7  22    9.90    1.30
   1   7 -22    9.00    1.20
  -1  -7  24    5.60    1.40
   1  -7 -24    3.30    1.10
  -1  -7  24    5.00    1.20
   1   7 -24    3.30    0.80
  -1   7  24    1.90    0.80
  -1   7  24    2.30    0.80
   1   7 -24    4.70    1.80
  -1  -7  26   -1.10    0.90
  -1  -7  26    0.70    0.90
   1  -7 -26   -1.80    1.20
  -1   7  26    0.10    0.90
  -1   7  26   -0.20    0.90
   1   7 -26    1.90    2.40
   1   7 -26    0.70    0.90
  -1  -7  28    0.40    0.90
  -1  -7  28    1.30    1.10
   1  -7 -28    0.90    1.40
  -1   7  28    1.40    1.10
  -1   7  28   -1.50    1.10
   1  -8  27    7.60    2.00
  -1  -8 -27    6.70    1.60
   1   8  27    6.40    1.30
   1  -8  25    7.40    1.60
   1  -8  25    8.40    1.80
  -1  -8 -25    6.80    1.30
   1   8  25    8.80    1.80
  -1   8 -25   12.90    3.70
   1   8  25   10.10    1.70
   1  -8  23   20.40    1.60
  -1  -8 -23   22.70    2.00
   1  -8  23   23.90    1.90
  -1   8 -23   24.80    3.60
   1   8  23   20.60    1.70
   1   8  23   21.60    1.90
  -1   8 -23   23.40    1.50
   1  -8  21    8.50    1.40
   1  -8  21    8.20    1.30
  -1   8 -21    5.80    1.90
   1   8  21    6.00    1.30
  -1   8 -21    6.20    1.10
   1  -8  19   19.00    1.50
  -1  -8 -19   20.10    2.10
   1   8  19   19.10    1.40
  -1   8 -19   19.00    1.30
   1   8  19   22.60    1.60
   1  -8  17    4.90    1.10
  -1  -8 -17    3.10    0.90
   1  -8  17    4.80    1.00
   1   8  17    2.60    0.60
   1   8  17    2.70    0.70
  -1  -8 -15   68.29    2.90
   1  -8  15   69.89    2.70
   1  -8  15   71.49    2.70
  -1   8 -15   69.49    2.60
   1   8  15   68.99    2.70
   1   8  15   66.89    2.70
   1  -8  13    3.60    0.80
  -1  -8 -13    3.10    0.80
   1  -8  13    2.60    0.50
   1   8  13    3.10    0.60
  -1   8 -13    4.20    0.80
   1   8  13    3.90    0.90
  -1  -8 -11    9.00    1.20
   1  -8  11   11.40    1.20
   1   8  11    8.20    0.90
  -1   8 -11    8.70    0.80
   1   8  11    7.90    0.90
   1  -8   9    0.60    0.30
  -1  -8  -9    1.10    0.60
   1  -8   9    2.20    0.60
  -1   8  -9    0.60    0.40
   1   8   9    0.20    0.40
   1   8   9    0.20    0.60
  -1   8  -9   -0.60    0.70
  -1  -8  -7  137.59    4.70
   1  -8   7  147.79    4.60
  -1  -8  -7  154.28    5.00
   1  -8   7  141.29    5.00
   1   8   7  146.99    4.70
  -1   8  -7  119.39    5.30
   1   8   7  146.09    4.70
  -1   8  -7  140.89    4.60
  -1   8  -7  153.08    4.60
  -1  -8  -5  196.38    6.20
  -1  -8  -5  204.58    6.50
   1  -8   5  201.38    6.10
   1  -8   5  192.98    6.60
  -1   8  -5  202.08    6.20
   1   8   5  202.28    6.40
  -1   8  -5  189.18    6.40
  -1  -8  -3   18.50    1.30
   1  -8   3   17.90    1.50
  -1  -8  -3   19.10    1.00
  -1   8  -3   20.30    1.00
   1   8   3   19.10    1.00
  -1   8  -3   18.20    1.30
   1  -8   1    2.80    0.80
  -1  -8  -1    2.10    0.60
  -1  -8  -1    3.90    0.70
  -1  -8  -1    4.70    0.90
  -1   8  -1    4.30    0.90
   1   8   1    2.60    0.50
  -1   8  -1    3.50    0.60
   1  -8  -1   76.49    2.90
  -1  -8   1   79.39    3.00
  -1  -8   1   80.99    2.80
  -1   8   1   77.39    2.80
   1   8  -1   80.59    2.80
  -1   8   1   83.19    2.70
  -1  -8   3   66.59    2.30
   1  -8  -3   63.49    2.50
  -1  -8   3   64.79    2.60
  -1   8   3   65.49    2.20
   1   8  -3   63.89    2.30
  -1   8   3   62.59    2.30
   1  -8  -5    9.10    0.70
  -1  -8   5    9.10    1.00
   1  -8  -5    9.00    1.10
  -1   8   5    8.90    0.70
   1   8  -5   10.10    0.80
  -1   8   5    9.70    0.80
  -1   8   5   11.00    0.70
  -1  -8   7    4.70    1.10
   1  -8  -7    3.50    0.70
   1   8  -7    5.80    0.70
   1   8  -7    5.70    1.20
   1  -8  -9   30.40    1.50
  -1  -8   9   30.90    1.70
  -1  -8   9   24.60    1.40
   1  -8  -9   25.50    1.30
  -1   8   9   29.60    1.30
  -1   8   9   25.80    1.20
   1   8  -9   29.20    1.30
  -1   8   9   29.20    1.20
  -1  -8  11   42.70    1.80
   1  -8 -11   40.50    1.80
  -1  -8  11   39.70    2.00
  -1   8  11   39.30    1.70
   1   8 -11   41.30    1.70
  -1   8  11   40.10    1.80
  -1  -8  13    5.70    0.90
   1  -8 -13    4.70    1.10
  -1   8  13    7.40    0.80
   1   8 -13    5.90    0.90
  -1   8  13    5.00    0.80
  -1  -8  15   78.59    3.00
  -1  -8  15   83.59    3.10
   1  -8 -15   79.99    3.10
   1   8 -15   83.79    3.00
  -1   8  15   79.89    3.00
  -1   8  15   83.09    3.00
  -1  -8  17   34.60    1.70
   1  -8 -17   34.20    1.90
  -1  -8  17   34.80    1.80
  -1   8  17   33.60    1.70
   1   8 -17   34.40    1.80
  -1   8  17   34.80    1.70
  -1  -8  19   19.20    1.50
  -1  -8  19   22.30    1.50
   1  -8 -19   18.50    1.60
   1   8 -19   18.20    1.40
  -1   8  19   20.80    1.30
  -1   8  19   21.00    1.40
  -1  -8  21    4.80    1.30
   1  -8 -21    4.10    1.00
  -1  -8  21    3.00    0.80
   1   8 -21    4.90    1.10
  -1   8  21    4.50    1.20
  -1   8  21    5.10    1.20
   1  -8 -23    0.50    1.10
  -1  -8  23    0.60    0.70
  -1  -8  23    1.80    0.90
  -1   8  23    0.30    0.80
   1   8 -23    0.80    0.80
  -1   8  23    0.10    0.80
   1  -8 -25   -0.20    1.10
  -1  -8  25    1.10    0.90
  -1  -8  25    0.50    0.90
   1   8 -25    0.50    2.10
   1   8 -25    0.30    0.80
  -1   8  25    2.00    0.90
  -1   8  25    0.70    0.90
   1  -8 -27    4.30    1.50
  -1  -8  27    5.90    1.00
  -1   8  27    5.80    1.20
  -1   8  27    6.20    1.10
   1   8 -27    7.20    2.80
   1  -9  24    5.10    1.00
   1  -9  24    6.30    1.60
  -1  -9 -24    8.20    2.10
  -1   9 -24    5.60    1.30
   1   9  24    8.20    1.60
   1   9  24    6.40    1.20
  -1   9 -24    8.60    2.20
  -1  -9 -22   -1.20    1.20
   1  -9  22    0.00    0.80
  -1   9 -22    0.90    0.70
  -1   9 -22    0.10    1.80
   1   9  22    1.50    1.00
   1   9  22    1.20    0.90
   1  -9  20   10.20    1.40
  -1  -9 -20    9.40    1.70
   1  -9  20    6.50    1.30
   1   9  20    5.90    1.10
  -1   9 -20    6.40    1.10
   1   9  20    5.20    1.30
   1  -9  18   34.20    1.80
  -1   9 -18   34.30    1.70
   1   9  18   32.50    1.80
   1   9  18   34.10    1.90
   1  -9  16   46.40    2.10
   1  -9  16   51.49    2.20
  -1  -9 -16   54.29    2.50
  -1   9 -16   51.19    2.20
   1   9  16   50.79    2.40
  -1  -9 -14   36.00    2.00
   1  -9  14   31.90    1.50
   1  -9  14   30.80    1.70
   1   9  14   31.70    1.70
  -1   9 -14   34.70    1.60
   1   9  14   33.10    1.70
  -1  -9 -12   18.90    1.60
   1  -9  12   21.10    1.20
   1  -9  12   21.30    1.60
   1   9  12   21.30    1.30
   1   9  12   20.40    1.30
  -1   9 -12   19.80    1.20
  -1  -9 -10   41.20    2.00
   1  -9  10   40.10    1.60
   1  -9  10   39.50    2.00
  -1   9 -10   40.70    1.60
   1   9  10   39.50    1.80
   1   9  10   38.30    1.80
   1  -9   8   18.70    1.40
  -1  -9  -8   21.60    1.50
   1  -9   8   19.00    0.90
   1   9   8   20.70    1.20
  -1   9  -8   19.80    1.10
  -1   9  -8   17.80    1.30
  -1  -9  -6    6.10    0.70
  -1  -9  -6    3.20    0.70
   1  -9   6    3.70    1.00
   1  -9   6    4.70    0.50
  -1   9  -6    3.50    0.90
  -1   9  -6    4.20    0.60
   1   9   6    5.70    0.80
  -1  -9  -4    2.20    0.70
  -1  -9  -4    3.40    0.70
   1  -9   4    1.90    0.60
   1   9   4    2.80    0.70
  -1   9  -4    2.60    0.60
  -1   9  -4    1.90    0.60
  -1  -9  -2    3.10    0.80
  -1  -9  -2    1.50    0.40
  -1  -9  -2    1.50    0.60
   1  -9   2    2.40    0.70
  -1   9  -2    0.70    0.60
   1   9   2    1.50    0.40
  -1   9  -2    2.10    0.50
  -1  -9   0    6.00    0.70
  -1  -9   0    5.20    1.00
  -1  -9   0    6.30    0.80
   1  -9   0    5.20    1.10
  -1   9   0    4.80    0.90
   1   9   0    4.90    0.70
  -1   9   0    4.60    0.60
   1  -9  -2   -0.20    0.80
  -1  -9   2    0.80    0.40
  -1  -9   2    1.50    0.60
  -1   9   2    0.40    0.30
  -1   9   2    0.00    0.50
   1   9  -2    0.20    0.40
  -1  -9   4    2.70    0.70
  -1  -9   4    1.50    0.70
   1  -9  -4    2.30    0.70
   1   9  -4    1.70    0.40
  -1   9   4    1.30    0.40
   1  -9  -6    5.50    0.70
  -1  -9   6    7.60    0.80
   1  -9  -6    9.00    1.10
  -1   9   6    6.70    0.70
  -1   9   6    8.60    0.70
   1   9  -6    8.30    0.80
   1   9  -6    5.40    1.10
   1  -9  -8   75.19    2.80
   1  -9  -8   83.79    3.00
  -1  -9   8   84.89    2.90
  -1  -9   8   82.19    3.20
  -1   9   8   84.99    2.80
  -1   9   8   76.39    2.70
   1   9  -8   83.39    2.90
   1   9  -8   75.19    3.00
  -1   9   8   83.39    2.80
   1  -9 -10    9.10    1.20
  -1  -9  10   10.70    1.70
  -1  -9  10   10.00    1.40
  -1   9  10    9.60    0.90
   1   9 -10    9.70    1.00
  -1   9  10    9.50    1.00
  -1  -9  12   17.10    1.50
   1  -9 -12   15.70    1.30
  -1  -9  12   17.40    1.10
  -1   9  12   16.00    1.10
  -1   9  12   16.60    1.10
   1   9 -12   17.90    1.20
   1  -9 -14   34.10    1.80
  -1  -9  14   32.80    1.60
   1   9 -14   33.60    1.60
  -1   9  14   31.00    1.50
  -1   9  14   31.80    1.60
   1  -9 -16   17.80    1.50
  -1  -9  16   16.20    1.30
  -1  -9  16   17.80    1.30
  -1   9  16   17.20    1.20
  -1   9  16   18.00    1.20
  -1  -9  18    2.90    0.70
  -1  -9  18    5.20    1.20
   1  -9 -18    3.60    0.90
  -1   9  18    4.20    1.00
  -1   9  18    2.60    0.70
   1   9 -18    2.60    0.70
   1  -9 -20   -1.00    1.00
  -1  -9  20    1.40    0.70
  -1  -9  20    1.40    0.70
   1   9 -20    0.80    0.70
  -1   9  20    2.70    0.70
  -1   9  20    1.00    0.70
  -1  -9  22    3.60    0.90
  -1  -9  22    2.60    0.80
   1  -9 -22    3.60    1.20
  -1   9  22    3.10    0.90
   1   9 -22    2.50    0.70
  -1   9  22    2.90    0.80
  -1  -9  24    3.90    0.90
  -1  -9  24    6.80    1.60
   1  -9 -24    7.40    1.80
  -1   9  24    4.80    1.00
  -1   9  24    5.10    0.90
   1   9 -24    3.30    0.90
  -1  -9  26   31.70    2.20
   1  -9 -26   32.60    2.60
  -1  -9  26   33.40    2.00
   1   9 -26   23.90    4.20
   1   9 -26   23.40    1.60
  -1   9  26   32.30    2.20
  -1 -10 -23    0.60    1.30
   1 -10  23    1.10    1.00
   1  10  23    0.60    1.10
  -1  10 -23    2.30    2.40
  -1  10 -23    1.70    0.90
   1  10  23    2.50    1.00
   1 -10  21   17.00    1.70
   1 -10  21   17.30    1.60
  -1 -10 -21   17.00    2.00
   1  10  21   16.30    1.80
  -1  10 -21   19.60    1.40
   1  10  21   19.50    1.90
   1 -10  19    9.60    1.30
   1 -10  19    7.80    1.40
  -1 -10 -19    8.50    1.80
  -1  10 -19    6.50    1.10
   1  10  19    7.20    1.30
   1  10  19    8.00    1.70
   1 -10  17    2.70    0.70
   1  10  17    0.80    0.70
   1  10  17    0.30    0.80
  -1 -10 -15   12.00    1.50
   1 -10  15   10.90    1.20
   1 -10  15    8.00    1.00
   1  10  15   14.30    1.40
   1  10  15    9.80    1.40
  -1 -10 -13    9.50    1.50
   1 -10  13    9.80    0.90
   1  10  13   12.70    1.10
  -1  10 -13   11.40    1.00
   1  10  13    9.20    1.20
  -1 -10 -11   15.80    1.60
   1 -10  11   19.70    1.60
  -1  10 -11   16.20    1.10
   1  10  11   16.00    1.30
   1  10  11   15.30    1.20
  -1 -10  -9    5.80    1.30
   1 -10   9    8.20    0.70
   1 -10   9    8.50    1.30
   1  10   9    8.40    1.00
  -1  10  -9    7.90    0.80
  -1 -10  -7   36.50    2.00
   1 -10   7   37.80    1.90
   1 -10   7   35.20    1.30
  -1  10  -7   37.90    1.50
  -1  10  -7   35.10    1.60
   1  10   7   36.40    1.70
  -1 -10  -5    9.10    0.80
   1 -10   5    8.50    1.20
  -1 -10  -5    7.30    1.20
   1  10   5    7.30    0.90
  -1  10  -5    8.70    0.70
  -1 -10  -3   90.49    3.00
  -1 -10  -3   93.99    3.20
  -1 -10  -3   91.99    3.50
   1 -10   3   91.59    3.40
   1  10   3   98.49    3.40
  -1  10  -3   98.59    3.30
   1 -10   1    5.70    1.00
  -1 -10  -1    4.10    0.80
  -1 -10  -1    5.30    0.70
  -1  10  -1    2.80    0.60
  -1  10  -1    4.90    0.70
   1  10   1    4.00    0.80
   1 -10  -1   13.80    1.20
  -1 -10   1   13.30    1.00
  -1 -10   1   12.60    1.00
  -1 -10   1   16.20    1.30
   1  10  -1   13.50    0.90
  -1  10   1   11.70    0.80
  -1  10   1   12.00    1.00
  -1 -10   3   46.10    1.80
   1 -10  -3   46.40    2.00
  -1 -10   3   47.70    2.20
  -1  10   3   48.20    1.80
   1  10  -3   47.10    1.90
  -1  10   3   42.80    1.80
  -1 -10   5    7.80    0.80
  -1 -10   5    8.00    1.30
   1 -10  -5    7.90    1.10
  -1  10   5    6.30    0.80
   1  10  -5    6.30    0.90
  -1  10   5    6.20    0.70
  -1 -10   7   80.99    2.80
  -1 -10   7   79.99    3.20
   1 -10  -7   72.79    2.60
   1 -10  -7   78.89    3.00
  -1  10   7   67.39    2.70
   1  10  -7   69.29    2.70
   1  10  -7   78.59    2.70
  -1  10   7   80.99    2.70
   1 -10  -9   73.09    2.80
  -1 -10   9   81.09    3.20
   1 -10  -9   82.19    3.10
  -1  10   9   79.89    2.80
   1  10  -9   83.19    2.90
  -1  10   9   80.59    2.90
   1 -10 -11   63.59    2.70
  -1 -10  11   60.39    2.40
  -1 -10  11   66.89    2.80
  -1  10  11   63.69    2.40
   1  10 -11   63.09    2.40
  -1  10  11   61.39    2.50
  -1 -10  13   58.29    2.30
  -1 -10  13   58.79    2.80
   1 -10 -13   63.49    2.70
   1  10 -13   58.99    2.40
  -1  10  13   61.09    2.30
  -1  10  13   61.39    2.30
  -1 -10  15    8.30    1.00
   1 -10 -15    8.70    1.50
  -1  10  15    7.70    1.10
  -1  10  15    8.60    1.00
   1  10 -15   10.50    1.10
  -1 -10  17   11.70    1.20
   1 -10 -17   11.60    1.60
  -1 -10  17   10.60    1.20
   1  10 -17   11.40    1.20
  -1  10  17    8.00    1.20
  -1  10  17   10.80    1.30
  -1 -10  19    0.40    0.80
  -1 -10  19    1.30    0.70
   1 -10 -19    0.00    1.10
  -1  10  19    2.10    0.80
   1  10 -19   -0.20    0.70
  -1  10  19   -0.80    0.70
  -1 -10  21    2.00    0.80
   1 -10 -21    2.00    1.20
  -1  10  21    2.10    1.00
   1  10 -21    2.90    0.80
  -1 -10  23    2.40    0.90
   1 -10 -23    4.40    1.30
  -1  10  23    4.40    1.00
   1  10 -23    5.00    1.30
  -1  10  23    3.20    1.00
  -1 -10  25    0.80    1.00
   1 -10 -25    3.30    1.50
  -1 -10  25    2.40    0.90
  -1  10  25    2.60    1.10
   1  10 -25   -0.80    1.00
  -1  10  25    1.50    1.10
   1 -11  22    0.80    0.90
  -1 -11 -22   -1.00    1.30
  -1  11 -22    1.60    0.80
   1  11  22    0.90    1.20
   1  11  22    2.00    1.00
   1 -11  20   -0.60    0.90
  -1 -11 -20    0.20    1.30
  -1  11 -20    0.20    0.70
   1  11  20    1.70    0.90
   1  11  20    1.80    1.10
  -1 -11 -18   55.69    2.80
   1 -11  18   52.99    2.40
  -1  11 -18   56.29    2.20
   1  11  18   55.49    2.50
   1  11  18   49.70    2.60
  -1 -11 -16   65.29    3.40
   1  11  16   63.89    2.80
   1  11  16   60.39    2.70
  -1  11 -16   62.59    2.50
  -1 -11 -14    1.10    1.00
   1  11  14    1.90    0.70
  -1  11 -14    0.70    0.60
   1 -11  12   15.30    1.70
   1  11  12   11.40    1.40
  -1  11 -12   15.50    1.10
   1 -11  10   59.49    2.20
  -1 -11 -10   60.49    2.70
   1 -11  10   59.99    2.80
   1  11  10   61.59    2.60
  -1  11 -10   64.69    2.40
  -1 -11  -8  117.69    4.30
   1 -11   8  107.29    4.20
   1  11   8  115.09    4.10
  -1  11  -8  117.09    3.90
   1 -11   6   87.69    3.50
  -1 -11  -6   91.29    3.50
  -1  11  -6   92.69    3.20
   1  11   6   91.89    3.30
  -1 -11  -4   27.80    1.80
  -1 -11  -4   28.40    1.50
   1 -11   4   25.70    1.70
   1  11   4   28.40    1.50
  -1  11  -4   30.00    1.40
  -1 -11  -2   10.00    1.10
  -1 -11  -2   10.40    1.40
   1 -11   2   11.80    1.30
  -1 -11  -2    9.00    1.00
   1  11   2   10.30    1.00
  -1  11  -2   10.20    0.80
  -1 -11   0    1.70    0.80
  -1 -11   0    0.80    0.50
   1 -11   0    2.50    0.70
  -1  11   0    2.80    0.60
   1 -11  -2    5.00    1.30
  -1 -11   2    4.40    0.80
  -1 -11   2    7.40    1.20
  -1  11   2    7.90    0.80
   1  11  -2    6.40    0.90
  -1 -11   4   16.10    1.00
  -1 -11   4   16.00    1.60
   1 -11  -4   17.40    1.40
  -1  11   4   18.80    1.00
   1  11  -4   16.90    1.10
  -1 -11   6   58.29    2.70
  -1 -11   6   60.79    2.20
   1 -11  -6   62.99    2.60
  -1  11   6   59.59    2.30
   1  11  -6   63.29    2.40
  -1 -11   8   19.90    1.70
   1 -11  -8   22.90    1.70
  -1 -11   8   20.30    1.20
  -1  11   8   20.20    1.10
   1  11  -8   20.40    1.30
  -1 -11  10   14.80    1.70
  -1 -11  10   15.20    1.10
   1 -11 -10   16.50    1.50
  -1  11  10   16.80    1.10
  -1  11  10   13.60    1.10
   1  11 -10   16.00    1.20
  -1 -11  12   15.50    1.80
  -1 -11  12   11.60    1.00
   1 -11 -12   12.50    1.50
  -1  11  12   12.50    1.10
   1  11 -12   11.80    1.40
  -1  11  12   12.00    1.20
  -1 -11  14    6.60    1.00
   1 -11 -14    6.30    1.00
  -1  11  14    6.60    1.10
  -1  11  14    5.80    1.00
   1  11 -14    8.20    1.10
   1 -11 -16   11.00    1.70
  -1 -11  16   13.20    1.20
  -1  11  16   11.00    1.70
  -1  11  16   10.50    1.30
   1  11 -16   11.20    1.20
  -1 -11  18    8.10    1.40
  -1 -11  18    8.50    1.30
   1  11 -18    7.60    1.20
  -1  11  18    7.90    1.50
  -1  11  18    9.40    1.30
  -1 -11  20   12.70    1.60
  -1 -11  20   14.80    1.50
   1  11 -20   13.10    1.30
  -1  11  20   13.40    1.50
  -1 -11  22    3.60    0.90
   1 -11 -22    2.80    1.40
  -1  11  22    2.90    1.00
   1  11 -22    5.70    1.30
   1 -12  21    8.70    1.60
  -1 -12 -21    9.90    2.50
   1  12  21   14.50    1.90
  -1  12 -21   10.30    1.50
  -1 -12 -19   18.60    2.40
   1 -12  19   20.50    1.70
  -1  12 -19   19.30    1.40
   1  12  19   23.10    1.90
   1 -12  17   -1.20    0.90
  -1 -12 -17    1.80    1.30
   1  12  17    1.40    0.80
  -1  12 -17    0.50    0.70
  -1 -12 -15    0.60    1.10
  -1  12 -15    1.60    0.70
   1  12  15    2.50    0.80
   1 -12  13   51.59    3.00
  -1  12 -13   51.39    2.10
   1  12  13   51.19    2.30
  -1 -12 -11  128.79    4.80
   1 -12  11  124.99    4.80
   1  12  11  123.79    4.40
   1 -12   9   77.19    3.30
  -1 -12  -9   79.79    3.40
  -1  12  -9   79.99    2.90
  -1 -12  -7   18.10    1.80
   1 -12   7   17.70    1.70
   1  12   7   18.50    1.30
  -1  12  -7   17.20    1.10
   1 -12   5    4.40    0.90
  -1 -12  -5    5.50    1.40
   1  12   5    4.80    1.00
  -1  12  -5    4.80    0.80
   1 -12   3    3.30    0.80
  -1 -12  -3    2.30    0.90
  -1  12  -3    3.20    0.80
   1  12   3    2.80    0.60
  -1 -12  -1    0.70    0.90
   1 -12   1    1.00    0.80
  -1  12  -1    0.30    0.40
   1  12   1    0.60    0.60
   1 -12  -1   13.00    1.50
  -1 -12   1   12.80    1.50
  -1  12   1   13.10    1.00
   1  12  -1   11.90    1.10
   1 -12  -3   10.60    1.50
  -1 -12   3   10.80    1.60
   1  12  -3   11.80    1.20
  -1  12   3   12.40    1.00
   1 -12  -5    2.20    0.80
  -1 -12   5    2.30    0.90
  -1  12   5    2.60    0.60
   1 -12  -7   11.10    1.50
  -1 -12   7   10.30    1.70
  -1  12   7   11.00    1.00
   1  12  -7   10.90    1.00
  -1 -12   9    4.20    1.00
   1 -12  -9    3.40    1.00
  -1  12   9    5.60    0.90
   1  12  -9    4.80    1.20
   1 -12 -11   59.99    2.80
  -1  12  11   58.39    2.30
   1  12 -11   57.69    2.40
  -1 -12  13  132.99    5.00
   1 -12 -13  128.89    4.90
  -1  12  13  130.49    4.50
   1  12 -13  130.59    4.50
   1 -12 -15   18.70    1.90
  -1  12  15   21.60    1.40
   1  12 -15   19.10    1.40
  -1 -12  17    1.90    0.90
   1  12 -17    2.30    0.80
  -1  12  17    0.70    0.80
   1 -12 -19   -1.00    1.30
  -1 -12  19    2.30    0.90
  -1  12  19    2.30    0.80
   1  12 -19    0.80    0.80
   1 -12 -21    0.90    1.40
  -1 -12  21    2.40    0.90
  -1  12  21    3.30    1.00
   1 -13  18    0.60    0.90
  -1 -13 -18   -0.40    1.50
  -1  13 -18    0.80    0.80
   1  13  18    2.00    1.00
  -1 -13 -16    9.90    2.30
   1 -13  16    8.60    1.40
  -1  13 -16    8.00    1.20
   1  13  16   10.30    1.60
   1 -13  14    4.80    1.30
  -1 -13 -14    5.00    1.30
   1  13  14    5.10    0.90
  -1  13 -14    4.70    1.00
  -1 -13 -12   11.00    2.10
  -1  13 -12    9.40    1.10
   1  13  12   10.40    1.40
   1 -13  10    2.20    1.00
  -1  13 -10    0.10    0.60
   1  13  10    0.10    0.80
  -1 -13  -8   25.30    2.10
   1 -13   8   28.10    2.10
   1  13   8   27.70    1.60
  -1 -13  -6   14.80    1.90
   1 -13   6   17.60    1.80
   1  13   6   21.10    1.40
  -1  13  -6   19.20    1.20
   1 -13   4    6.60    1.60
  -1 -13  -4    8.20    1.60
  -1  13  -4    7.00    0.90
   1 -13   2   31.60    2.00
  -1 -13  -2   26.80    2.00
  -1  13  -2   32.50    1.50
   1 -13   0   99.69    3.90
  -1 -13   0   99.39    4.00
  -1  13   0  105.19    3.60
  -1 -13   2    0.20    1.00
   1 -13  -2   -0.30    1.00
  -1  13   2    1.90    0.50
   1 -13  -4   60.49    2.80
  -1 -13   4   59.19    2.90
  -1  13   4   63.29    2.30
   1  13  -4   59.59    2.70
  -1 -13   6    5.10    1.10
   1 -13  -6    5.90    1.50
  -1  13   6    3.90    0.60
   1 -13  -8    3.70    1.00
  -1  13   8    4.90    1.00
   1  13  -8    5.80    1.10
   1 -13 -10    2.90    1.10
  -1 -13  10    2.50    1.10
   1  13 -10    3.20    0.70
  -1  13  10    1.90    0.60
   1 -13 -12   19.10    2.00
  -1 -13  12   18.70    2.10
   1  13 -12   17.70    1.30
  -1  13  12   19.00    1.50
  -1 -13  14   16.90    2.20
   1  13 -14   18.30    1.40
  -1  13  14   17.10    1.40
   1 -13 -16    0.50    1.30
  -1  13  16    0.30    0.80
   1  13 -16    1.30    0.80
  -1 -13  18   -1.40    0.90
   1 -13 -18    0.60    1.40
   1  13 -18    0.10    0.80
  -1  13  18    3.80    0.90
  -1 -14 -17   22.70    2.60
   1 -14  17   19.60    1.80
   1  14  17   26.80    2.00
  -1  14 -17   19.30    1.60
  -1 -14 -15   -2.20    1.50
   1  14  15    0.50    1.00
  -1  14 -15   -0.60    0.80
   1 -14  13   29.40    2.50
  -1 -14 -13   31.10    2.50
  -1  14 -13   32.80    1.70
   1  14  13   34.00    2.00
  -1 -14 -11   10.60    2.20
   1 -14  11    7.60    1.30
  -1  14 -11    9.20    1.00
   1  14  11    9.00    1.30
  -1 -14  -9    3.10    1.30
  -1  14  -9    1.90    0.70
   1  14   9    1.70    0.80
   1 -14   7    4.10    1.10
  -1 -14  -7    4.20    1.30
   1  14   7    4.00    0.80
   1 -14   5    7.60    1.80
   1  14   5   11.10    1.20
  -1  14  -5   10.60    1.00
   1 -14   3    6.60    1.70
   1  14   3    4.70    1.20
   1 -14   1    2.80    1.10
   1  14   1    2.00    0.70
  -1  14  -1    3.60    0.90
   1 -14  -1   60.89    2.90
  -1  14   1   68.49    2.50
   1  14  -1   65.49    2.70
   1 -14  -3   49.20    2.60
  -1  14   3   51.29    2.10
   1  14  -3   52.09    2.20
  -1 -14   5    0.60    1.20
   1 -14  -5    1.10    1.10
  -1  14   5    0.70    0.70
   1  14  -5    1.90    0.70
  -1 -14   7   15.40    2.10
   1 -14  -7   11.70    1.90
   1  14  -7   13.10    1.30
  -1 -14   9    3.90    1.30
   1 -14  -9    7.70    1.90
   1  14  -9    6.00    1.10
  -1 -14  11    5.60    1.30
   1  14 -11    4.70    1.10
  -1  14  11    4.10    0.70
  -1 -14  13    9.40    2.00
   1 -14 -13    7.80    1.40
  -1  14  13    9.80    1.30
   1  14 -13   11.30    1.20
  -1 -14  15    3.10    1.40
   1 -14 -15    4.80    1.50
  -1  14  15    3.20    0.80
   1  14 -15    1.60    0.90
   1 -14 -17    0.10    1.60
   1  14 -17    5.50    1.30
   1 -15  14   11.00    2.50
  -1 -15 -14    9.50    1.80
  -1  15 -14   13.10    1.30
   1  15  14   12.00    1.70
   1 -15  12    4.60    1.40
  -1 -15 -12    2.90    1.60
   1  15  12    4.20    1.00
  -1  15 -12    6.20    1.20
   1 -15  10   12.80    2.30
  -1 -15 -10   12.40    2.40
  -1  15 -10   10.40    1.10
   1  15  10   13.90    1.50
   1 -15   8    3.80    1.30
  -1 -15  -8   -1.30    1.40
   1  15   8    1.80    0.90
  -1  15  -8    0.60    0.70
  -1 -15  -6   47.80    3.00
   1 -15   6   49.80    2.80
   1  15   6   45.70    2.20
  -1  15  -6   45.70    1.90
  -1 -15  -4   33.20    2.60
   1  15   4   34.30    1.80
  -1  15  -4   33.00    1.60
  -1 -15  -2   25.60    2.40
   1 -15   2   30.40    2.60
   1  15   2   27.00    1.60
  -1  15  -2   29.90    1.50
   1 -15   0   47.40    2.80
  -1 -15   0   45.40    2.90
   1  15   0   49.90    2.20
  -1  15   0   49.40    2.00
  -1 -15   2    3.90    1.30
   1 -15  -2    6.40    1.30
  -1  15   2    8.50    1.00
   1  15  -2    7.60    1.20
   1 -15  -4   60.39    3.10
  -1 -15   4   63.09    3.20
   1  15  -4   62.69    2.60
  -1  15   4   65.69    2.50
  -1 -15   6   62.09    3.20
   1  15  -6   67.49    2.60
  -1  15   6   65.09    2.60
  -1 -15   8   88.99    4.00
   1  15  -8   90.19    3.40
  -1  15   8   95.29    3.30
  -1 -15  10   24.50    2.30
   1 -15 -10   28.40    2.70
   1  15 -10   30.60    1.70
  -1  15  10   28.90    1.60
  -1 -15  12    1.90    1.40
   1 -15 -12    2.30    1.50
  -1  15  12   -0.70    0.90
   1  15 -12    0.80    0.80
   1 -15 -14    0.30    1.80
  -1 -15  14    1.50    1.50
  -1  15  14    1.90    0.90
   1  15 -14    2.50    0.90
   1 -16   9    3.60    1.40
  -1 -16  -9   -1.00    1.60
   1  16   9    2.60    1.00
  -1  16  -9    2.60    0.80
   1 -16   7    5.90    1.40
  -1 -16  -7    4.90    1.60
   1  16   7    4.00    1.00
  -1 -16  -5    3.80    1.50
   1 -16   5    2.70    1.40
   1  16   5    5.40    1.40
  -1 -16  -3   28.30    2.70
   1 -16   3   26.00    2.60
   1  16   3   23.40    1.70
  -1  16  -3   25.10    1.40
  -1 -16  -1   13.00    2.50
   1 -16   1   16.80    2.40
   1  16   1   15.10    1.50
  -1  16  -1   13.70    1.20
   1 -16  -1   26.10    2.70
  -1 -16   1   27.50    2.60
  -1  16   1   22.00    1.40
   1  16  -1   26.20    1.60
   1 -16  -3    9.50    2.40
   1  16  -3    3.00    0.80
  -1  16   3    2.00    0.70
   1 -16  -5   23.10    2.70
  -1 -16   5   20.70    2.60
   1  16  -5   24.70    1.60
  -1  16   5   24.20    1.50
  -1 -16   7    9.10    1.50
   1 -16  -7    2.50    1.50
  -1  16   7    8.00    1.20
   1  16  -7    7.20    1.30
   1 -16  -9    2.90    2.60
  -1 -16   9    7.50    1.50
   1  16  -9    5.30    1.40
  -1  16   9    6.20    1.40
  -2   0 -30    1.90    1.10
   2   0  30    4.20    1.00
   2   0  30    4.60    1.10
   2   0  28   12.50    1.70
   2   0  28   10.00    1.60
  -2   0 -28   14.00    1.50
   2   0  26   24.10    1.90
  -2   0 -26   23.30    1.50
   2   0  26   22.60    1.60
  -2   0 -26   17.50    3.70
   2   0  24   33.70    1.80
   2   0  24   33.30    2.00
  -2   0 -24   33.60    3.40
  -2   0 -24   33.40    1.80
   2   0  22   30.60    1.80
  -2   0 -22   33.30    3.10
   2   0  20  414.46   13.30
  -2   0 -20  425.76   13.30
  -2   0 -20  431.36   14.50
   2   0  20  425.56   13.50
  -2   0 -18    0.20    1.20
   2   0  18   -1.00    0.60
   2   0  18    0.50    0.50
  -2   0 -18   -0.10    0.50
  -2   0 -16    0.50    0.40
  -2   0 -16   -0.90    1.00
   2   0  16    1.90    0.60
   2   0  16    0.80    0.40
  -2   0 -14    1.40    0.50
   2   0  14    2.20    0.50
  -2   0 -14    2.80    1.10
   2   0  14    2.20    0.40
  -2   0 -12  158.98    8.50
  -2   0 -12  172.58    5.50
   2   0  12  174.98    5.70
   2   0  12  177.18    5.60
   2   0  10   13.80    1.40
  -2   0 -10   12.70    2.30
   2   0  10   13.60    1.10
  -2   0 -10   13.40    0.90
   2   0   8   20.60    0.90
  -2   0  -8   19.60    0.90
   2   0   8   19.80    0.90
   2   0   8   20.00    1.10
  -2   0  -8   18.90    1.10
  -2   0  -8   19.40    1.70
   2   0   8   19.10    1.40
  -2   0  -8   20.20    1.00
  -2   0  -6  156.88    5.10
   2   0   6  161.08    5.60
   2   0   6  162.28    5.20
  -2   0  -6  170.78    5.80
  -2   0  -6  165.38    5.10
   2   0   6  162.88    5.10
   2   0   6  160.18    5.00
  -2   0  -6  161.18    5.10
  -2   0  -4   15.00    1.60
   2   0   4   14.50    1.00
  -2   0  -4   15.10    0.70
   2   0   4   15.20    1.30
   2   0   4   14.20    0.70
  -2   0  -4   14.40    0.80
  -2   0  -4   13.70    0.90
  -2   0  -2 2562.24   71.99
   2   0   2 2641.24   71.99
  -2   0  -2 1941.01   71.89
   2   0   0  696.13   21.30
   2   0   0  721.73   21.70
  -2   0   0  701.23   21.30
  -2   0   0  713.73   21.70
   2   0  -2 3004.30   99.59
  -2   0   2 3576.34  100.19
  -2   0   2 3501.45  100.09
   2   0  -2 3092.29   99.79
   2   0  -4 9657.13  282.27
   2   0  -4 8834.12  283.17
  -2   0   4 9999.00  282.27
   2   0  -4 9795.42  282.37
   2   0  -4 9121.09  282.57
  -2   0   4 9451.85  282.27
  -2   0   4 8788.82  283.07
  -2   0   6   23.60    0.90
  -2   0   6   24.30    1.30
  -2   0   6   23.20    0.90
   2   0  -6   23.50    1.30
   2   0  -6   23.50    0.90
   2   0  -6   23.50    0.90
  -2   0   8    0.80    0.30
  -2   0   8    1.00    0.50
  -2   0   8    0.80    0.30
   2   0  -8    1.00    0.30
   2   0  -8    0.60    0.60
   2   0  -8    1.00    0.30
   2   0 -10   90.09    3.20
  -2   0  10   90.09    3.00
  -2   0  10   93.69    3.10
   2   0 -10   94.29    3.00
  -2   0  10   94.49    3.40
   2   0 -10   97.49    3.10
  -2   0  12  110.89    3.90
   2   0 -12  120.39    3.90
  -2   0  12  120.89    4.10
   2   0 -12  125.89    4.10
  -2   0  12  120.79    4.00
  -2   0  14   14.50    0.90
   2   0 -14   14.90    1.10
   2   0 -14   16.50    1.30
  -2   0  14   14.90    1.20
   2   0 -16    0.60    0.70
   2   0 -16    2.80    0.70
  -2   0  16    1.50    0.40
  -2   0  18    8.40    1.00
  -2   0  18    7.20    0.80
   2   0 -18    9.40    1.50
   2   0 -18    7.30    0.90
  -2   0  20    7.40    0.80
  -2   0  20    7.80    1.10
   2   0 -20    8.60    1.10
   2   0 -22   22.90    2.20
  -2   0  22   20.90    1.60
   2   0 -22   18.90    1.40
  -2   0  22   20.80    1.30
  -2   0  24  164.98    5.80
  -2   0  24  162.88    5.60
  -2   0  26  255.07    8.40
  -2   0  26  251.07    8.50
   2   0 -26  257.77    8.30
  -2   0  28   29.80    1.80
   2   0 -28   29.30    1.80
  -2   0  28   28.40    2.10
   2   0 -30   14.50    1.70
  -2   0  30   19.20    1.70
  -2   0  30   18.50    1.90
   2  -1  29   -0.40    1.00
   2  -1  29   -0.50    1.10
  -2  -1 -29   -0.40    1.00
  -2   1 -29   -0.40    1.00
   2   1  29   -0.40    1.10
   2   1  29    1.30    1.00
   2  -1  27    3.50    0.90
   2  -1  27    7.40    1.70
  -2  -1 -27    4.50    1.00
  -2  -1 -27    5.60    2.20
   2   1  27    4.00    0.90
  -2   1 -27    6.10    1.40
   2   1  27    4.40    0.90
  -2  -1 -25    5.00    1.80
  -2  -1 -25    2.50    0.90
   2  -1  25    5.80    1.10
   2  -1  25    3.60    0.80
  -2   1 -25    2.50    0.80
   2   1  25    3.90    0.80
   2   1  25    6.10    1.50
  -2   1 -25    4.20    2.00
  -2  -1 -23   97.49    4.90
   2  -1  23  105.89    4.00
   2  -1  23  103.99    3.80
  -2  -1 -23  103.39    3.80
   2   1  23   94.09    5.00
   2   1  23  103.19    3.80
  -2   1 -23  100.19    3.70
  -2   1 -23  105.79    5.20
   2  -1  21  173.58    5.80
  -2  -1 -21  170.08    7.00
   2  -1  21  169.38    6.00
  -2  -1 -21  174.08    5.80
   2   1  21  168.58    5.90
   2   1  21  167.68    5.70
  -2   1 -21  167.38    6.90
  -2   1 -21  165.98    5.60
   2  -1  19   31.30    1.50
  -2  -1 -19   32.40    2.70
   2  -1  19   32.60    1.80
  -2  -1 -19   33.20    1.60
   2   1  19   33.10    1.60
  -2   1 -19   33.10    1.60
   2   1  19   32.60    1.80
  -2   1 -19   33.40    2.90
  -2  -1 -17    9.90    1.00
  -2  -1 -17    8.70    1.90
   2  -1  17   11.60    1.10
   2  -1  17    8.80    0.80
   2   1  17    9.40    0.80
  -2   1 -17   10.00    2.00
   2   1  17    7.90    1.10
  -2   1 -17    9.10    0.90
   2  -1  15    0.30    0.30
  -2  -1 -15    1.10    1.00
  -2  -1 -15   -0.30    0.50
   2  -1  15    0.80    0.50
   2   1  15    0.00    0.30
   2   1  15   -0.10    0.50
  -2   1 -15    1.10    0.90
  -2   1 -15    0.40    0.40
  -2  -1 -13   10.40    1.00
   2  -1  13   10.40    1.10
  -2  -1 -13   10.10    2.00
   2  -1  13   10.90    0.80
   2   1  13   11.50    0.90
  -2   1 -13   12.20    2.10
  -2   1 -13   11.90    0.90
   2   1  13    9.40    1.10
  -2  -1 -11  362.56   12.10
  -2  -1 -11  363.36   11.30
   2  -1  11  364.56   11.40
   2   1  11  331.77   11.80
  -2   1 -11  331.47   12.10
   2   1  11  359.56   10.80
  -2   1 -11  333.97   10.70
  -2   1 -11  355.16   10.60
   2   1  11  355.56   10.70
  -2  -1  -9  157.98    5.20
   2  -1   9  168.18    5.30
  -2  -1  -9  169.48    5.20
  -2  -1  -9  168.58    6.00
   2  -1   9  156.08    5.20
   2  -1   9  167.88    5.20
   2  -1   9  156.98    5.60
  -2   1  -9  154.78    5.10
  -2   1  -9  161.28    5.10
   2   1   9  158.18    5.80
  -2   1  -9  170.68    5.10
  -2   1  -9  164.78    6.00
   2   1   9  151.28    5.10
   2   1   9  167.18    5.30
   2   1   9  160.78    5.20
  -2  -1  -7   42.30    1.60
  -2  -1  -7   42.70    1.50
   2  -1   7   41.70    2.00
  -2  -1  -7   43.10    2.20
   2  -1   7   41.90    1.60
  -2  -1  -7   43.90    1.60
   2  -1   7   43.20    1.50
   2  -1   7   43.40    1.50
  -2   1  -7   42.80    1.50
   2   1   7   41.40    1.60
  -2   1  -7   43.10    2.30
  -2   1  -7   42.40    1.50
   2   1   7   42.40    2.10
   2   1   7   42.40    1.70
   2   1   7   42.60    1.50
  -2   1  -7   41.90    1.60
   2  -1   5    1.50    0.40
   2  -1   5    2.10    0.50
   2  -1   5    1.50    0.40
  -2  -1  -5    2.40    0.40
   2  -1   5    1.60    0.60
  -2  -1  -5    1.60    0.50
  -2  -1  -5    2.20    0.80
  -2  -1  -5    1.60    0.30
   2   1   5    1.30    0.50
   2   1   5    1.40    0.30
  -2   1  -5    2.20    0.40
  -2   1  -5    1.80    0.40
  -2   1  -5    0.90    0.70
   2   1   5    2.10    0.70
  -2   1  -5    1.20    0.40
   2   1   5    1.50    0.30
  -2  -1  -3  258.47    7.90
  -2  -1  -3  260.57    8.00
   2  -1   3  262.27    8.00
  -2  -1  -3  254.37    8.30
   2  -1   3  256.27    7.80
   2  -1   3  252.87    8.20
  -2  -1  -3  258.27    7.90
   2  -1   3  257.57    7.80
   2   1   3  251.77    8.40
   2   1   3  263.17    8.10
   2   1   3  250.17    7.90
  -2   1  -3  253.17    7.90
  -2   1  -3  260.97    7.90
   2   1   3  261.27    7.90
  -2   1  -3  266.57    8.00
  -2   1  -3  261.37    8.40
  -2  -1  -1  277.87    8.90
   2  -1   1  277.07    8.40
  -2  -1  -1  273.37    8.50
   2  -1   1  284.57    8.80
  -2  -1  -1  283.67    8.50
   2   1   1  277.87    8.50
   2   1   1  277.77    8.50
   2   1   1  273.07    8.80
  -2   1  -1  282.77    8.80
   2  -1  -1  332.37    9.70
   2  -1  -1  318.97    9.80
  -2  -1   1  326.77    9.80
  -2  -1   1  292.97    9.80
  -2  -1   1  308.77    9.60
  -2  -1   1  315.57    9.60
  -2   1   1  306.37    9.60
  -2   1   1  315.57    9.70
   2   1  -1  306.47    9.50
   2   1  -1  320.07    9.80
   2   1  -1  316.77    9.60
   2  -1  -3  216.08    6.80
  -2  -1   3  215.98    6.90
  -2  -1   3  218.48    6.70
   2  -1  -3  216.08    6.70
  -2  -1   3  221.78    6.70
   2  -1  -3  217.38    6.60
  -2   1   3  218.78    6.80
   2   1  -3  214.48    6.90
   2   1  -3  216.88    6.70
   2   1  -3  225.28    6.80
   2  -1  -5  252.97    8.20
  -2  -1   5  262.67    8.20
  -2  -1   5  265.27    8.00
   2  -1  -5  267.07    8.00
  -2  -1   5  269.47    8.00
   2  -1  -5  257.77    8.00
  -2   1   5  262.77    8.20
   2   1  -5  269.87    8.10
  -2   1   5  265.27    8.00
  -2   1   5  263.07    8.00
   2   1  -5  260.87    8.30
   2   1  -5  259.17    8.10
  -2  -1   7   14.60    0.70
  -2  -1   7   12.80    1.00
   2  -1  -7   14.80    0.70
   2  -1  -7   13.70    1.00
  -2  -1   7   13.50    0.70
   2  -1  -7   14.10    0.70
   2   1  -7   13.30    0.70
  -2   1   7   14.30    0.60
  -2   1   7   14.90    1.00
  -2   1   7   14.10    0.60
   2   1  -7   13.90    1.00
   2   1  -7   14.30    0.70
  -2  -1   9   12.50    0.70
   2  -1  -9   12.80    0.70
   2  -1  -9   12.60    1.10
  -2  -1   9   13.80    1.20
  -2  -1   9   13.30    0.80
   2  -1  -9   13.90    0.80
  -2   1   9   13.00    0.70
   2   1  -9   12.20    0.70
  -2   1   9   15.10    1.10
   2   1  -9   11.80    1.10
  -2   1   9   13.90    0.70
   2   1  -9   13.30    0.80
  -2  -1  11  115.49    4.10
  -2  -1  11  116.89    3.80
  -2  -1  11  107.49    3.70
   2  -1 -11  113.99    3.70
   2  -1 -11  120.59    3.80
  -2   1  11  110.69    3.80
  -2   1  11  106.79    3.60
  -2   1  11  122.19    4.20
   2   1 -11  112.59    3.70
  -2  -1  13   15.50    1.30
   2  -1 -13   15.80    1.20
  -2  -1  13   14.80    0.90
  -2   1  13   12.70    0.90
   2   1 -13   15.10    1.20
  -2   1  13   15.70    0.90
  -2   1  13   14.90    1.20
  -2  -1  15   28.30    1.50
   2  -1 -15   29.00    1.30
   2  -1 -15   30.40    1.60
  -2  -1  15   29.60    1.30
   2   1 -15   30.00    1.60
   2   1 -15   30.00    1.30
  -2   1  15   30.60    1.30
  -2   1  15   29.40    1.50
  -2  -1  17    1.20    0.50
   2  -1 -17    1.40    0.50
  -2  -1  17    2.80    0.60
   2  -1 -17    2.00    0.70
   2   1 -17    1.50    0.50
  -2   1  17    0.90    0.50
  -2   1  17    1.50    0.40
  -2  -1  19   27.30    1.60
   2  -1 -19   27.80    1.40
  -2  -1  19   26.40    1.30
   2  -1 -19   29.80    1.80
   2   1 -19   28.50    1.40
  -2   1  19   27.60    1.60
  -2   1  19   28.40    1.40
   2   1 -19   29.70    2.10
   2  -1 -21   15.80    1.70
  -2  -1  21   18.50    1.20
  -2  -1  21   19.90    1.50
   2  -1 -21   15.50    1.30
  -2   1  21   18.30    1.20
  -2   1  21   17.10    1.50
   2   1 -21   17.30    1.30
   2   1 -21   18.40    2.40
   2  -1 -23   11.40    1.20
   2   1 -23   14.80    1.30
   2   1 -23   11.60    2.30
  -2  -1  25    8.60    1.20
   2  -1 -25    8.30    1.30
  -2  -1  25    8.10    1.40
  -2   1  25    8.60    1.40
   2   1 -25    6.90    1.40
  -2   1  25    7.20    1.10
   2  -1 -27   56.79    2.50
  -2  -1  27   56.59    2.50
  -2  -1  27   54.09    2.70
  -2   1  27   59.69    2.50
   2   1 -27   58.29    2.50
  -2   1  27   53.59    2.60
   2  -1 -29   13.70    1.70
  -2  -1  29   12.80    1.70
  -2  -1  29   15.70    1.60
  -2   1  29   14.50    1.60
  -2   1  29   14.70    1.80
   2   1 -29   15.00    1.50
   2   2  30    0.10    1.40
   2  -2  28    0.00    0.90
   2  -2  28    0.40    0.90
  -2  -2 -28   -0.10    1.00
   2   2  28   -0.60    0.80
  -2   2 -28    1.40    2.90
   2   2  28    1.60    1.00
  -2   2 -28   -0.60    0.90
  -2  -2 -26   10.40    3.30
   2  -2  26   14.50    1.80
  -2  -2 -26   10.00    1.50
   2  -2  26   13.00    1.30
   2   2  26   12.00    1.70
   2   2  26   14.60    1.40
  -2   2 -26   13.00    1.30
  -2  -2 -24    2.20    1.70
   2  -2  24    1.10    0.90
   2  -2  24    1.40    0.70
  -2  -2 -24    1.10    0.80
   2   2  24    1.80    0.70
   2   2  24    2.00    0.90
  -2   2 -24    2.20    0.80
  -2   2 -24    0.40    2.00
  -2  -2 -22    2.90    1.60
   2  -2  22    1.80    0.60
  -2   2 -22    1.60    0.80
  -2   2 -22    3.90    1.70
   2  -2  20   68.39    2.70
  -2  -2 -20   70.69    3.70
   2  -2  20   68.19    2.90
  -2  -2 -20   68.59    2.80
  -2   2 -20   67.89    2.60
   2   2  20   65.39    2.90
  -2   2 -20   70.59    4.00
   2   2  20   70.79    2.70
   2  -2  18   16.80    1.10
   2  -2  18   16.70    1.30
  -2  -2 -18   17.80    1.30
  -2  -2 -18   18.80    2.10
  -2   2 -18   17.20    2.40
  -2   2 -18   18.10    1.10
   2   2  18   15.00    1.30
   2   2  18   18.10    1.20
  -2  -2 -16   59.49    3.20
   2  -2  16   59.89    2.30
  -2  -2 -16   61.79    2.30
   2  -2  16   61.69    2.40
  -2   2 -16   61.59    3.30
  -2   2 -16   59.69    2.20
   2   2  16   60.89    2.50
   2   2  16   60.09    2.30
  -2  -2 -14   45.20    2.90
   2  -2  14   45.20    1.80
  -2  -2 -14   44.70    1.80
   2  -2  14   46.00    1.90
   2   2  14   45.90    1.80
  -2   2 -14   43.80    1.70
   2   2  14   46.50    2.00
  -2   2 -14   44.40    2.70
   2  -2  12    3.90    0.90
   2  -2  12    3.70    1.00
  -2  -2 -12    2.80    0.70
  -2   2 -12    3.60    1.20
   2   2  12    3.50    0.70
  -2   2 -12    3.90    0.80
   2   2  12    4.00    1.00
  -2  -2 -10   70.09    3.40
  -2  -2 -10   72.59    2.60
   2  -2  10   66.49    2.90
   2  -2  10   69.39    2.50
   2   2  10   70.89    2.70
   2   2  10   63.19    3.10
   2   2  10   69.79    2.80
  -2   2 -10   69.69    4.10
  -2   2 -10   72.79    2.40
  -2   2 -10   67.79    2.50
   2  -2   8   14.30    0.80
   2  -2   8   16.90    1.00
  -2  -2  -8   13.90    0.90
  -2  -2  -8   13.60    0.80
   2  -2   8   13.60    0.70
  -2  -2  -8   14.90    1.00
  -2  -2  -8   14.70    1.70
   2   2   8   14.00    1.60
  -2   2  -8   14.20    0.90
   2   2   8   15.40    1.10
   2   2   8   15.10    1.00
   2   2   8   13.40    0.70
  -2   2  -8   14.30    0.80
  -2   2  -8   13.90    0.80
  -2   2  -8   13.80    1.70
  -2  -2  -6    1.10    0.30
   2  -2   6    0.70    0.40
  -2  -2  -6    1.60    0.70
   2  -2   6    1.10    0.30
  -2  -2  -6    0.90    0.40
  -2  -2  -6    1.20    0.40
   2  -2   6    1.30    0.30
  -2   2  -6    0.40    0.60
  -2   2  -6    1.10    0.40
   2   2   6    1.30    0.40
  -2   2  -6    1.10    0.30
   2   2   6    1.10    0.30
   2   2   6    1.80    0.70
   2   2   6    2.20    0.50
  -2  -2  -4   58.59    2.00
   2  -2   4   59.69    1.90
   2  -2   4   57.79    1.90
  -2  -2  -4   56.69    2.00
   2  -2   4   58.09    2.00
  -2  -2  -4   56.39    2.50
  -2  -2  -4   56.99    2.10
  -2   2  -4   59.39    2.00
  -2   2  -4   58.79    1.90
   2   2   4   58.49    2.00
   2   2   4   58.89    2.10
   2   2   4   56.39    2.50
  -2   2  -4   57.99    2.40
   2   2   4   56.59    2.00
  -2   2  -4   57.49    2.00
  -2  -2  -2  132.89    4.10
  -2  -2  -2  130.99    4.50
  -2  -2  -2  127.89    4.20
   2  -2   2  120.29    4.00
  -2  -2  -2  128.19    4.10
   2  -2   2  132.89    4.00
   2  -2   2  133.89    4.10
  -2   2  -2  131.09    4.00
  -2   2  -2  134.69    4.10
   2   2   2  134.29    4.60
  -2   2  -2  134.09    4.00
   2   2   2  131.29    4.20
  -2   2  -2  131.29    4.40
   2   2   2  121.99    4.10
  -2  -2   0 4228.98  120.09
  -2  -2   0 3708.13  119.99
   2   2   0 4231.58  124.49
   2   2   0 3998.20  124.39
  -2  -2   2  507.15   15.30
   2  -2  -2  509.45   15.30
  -2  -2   2  497.55   15.40
  -2  -2   2  496.65   15.30
  -2   2   2  499.45   15.10
   2   2  -2  489.95   15.10
   2   2  -2  475.25   15.20
   2   2  -2  524.45   15.20
   2  -2  -4  997.20   29.60
  -2  -2   4  977.50   29.70
   2  -2  -4  942.01   29.50
  -2  -2   4  996.60   29.60
  -2  -2   4  966.90   29.60
   2  -2  -4  993.50   29.50
  -2   2   4  978.60   29.20
   2   2  -4  970.80   29.50
  -2   2   4  957.00   29.20
   2   2  -4  946.11   29.30
   2   2  -4 1008.70   29.40
  -2   2   4  966.40   29.40
  -2  -2   6  305.17    9.20
  -2  -2   6  297.77    9.30
   2  -2  -6  306.17    9.10
   2  -2  -6  296.27    9.10
   2  -2  -6  296.17    9.30
  -2  -2   6  292.17    9.20
   2   2  -6  294.47    9.30
  -2   2   6  309.87    9.30
  -2   2   6  308.87    9.20
   2   2  -6  297.97    9.40
   2   2  -6  296.47    9.20
  -2   2   6  302.47    9.10
   2  -2  -8  386.26   11.80
  -2  -2   8  379.66   12.00
   2  -2  -8  376.76   11.90
  -2  -2   8  380.06   11.80
  -2  -2   8  398.26   11.80
   2  -2  -8  391.56   11.70
  -2   2   8  393.86   11.70
  -2   2   8  378.76   11.80
   2   2  -8  396.36   11.70
   2   2  -8  375.46   11.90
  -2   2   8  381.56   11.60
   2   2  -8  369.96   11.80
   2  -2 -10   10.90    0.80
  -2  -2  10    9.70    0.80
   2  -2 -10   11.90    1.30
  -2   2  10    9.90    0.90
  -2   2  10   12.30    1.20
  -2   2  10   11.40    0.70
   2   2 -10   11.20    0.90
  -2  -2  12  156.28    5.10
  -2  -2  12  160.98    5.30
   2  -2 -12  157.18    5.00
  -2   2  12  158.98    5.00
   2   2 -12  160.28    5.00
  -2   2  12  150.08    4.90
  -2   2  12  155.88    5.20
  -2  -2  14  141.49    4.70
  -2  -2  14  141.59    4.90
   2  -2 -14  146.69    4.70
   2  -2 -14  145.69    4.70
  -2   2  14  143.89    4.50
  -2   2  14  140.29    4.70
   2   2 -14  142.59    4.50
  -2   2  14  130.19    4.40
  -2  -2  16    7.10    0.70
  -2  -2  16    6.30    1.00
   2  -2 -16    5.80    0.80
   2  -2 -16    6.70    0.90
   2   2 -16    6.10    0.80
  -2   2  16    6.70    0.90
  -2   2  16    4.70    0.70
  -2  -2  18   59.99    2.50
   2  -2 -18   61.59    2.30
  -2  -2  18   59.09    2.30
   2  -2 -18   61.59    2.40
   2   2 -18   61.39    2.30
  -2   2  18   62.59    2.30
  -2   2  18   61.39    2.50
   2   2 -18   62.99    3.00
  -2  -2  20    9.60    0.90
   2  -2 -20    9.10    1.10
   2  -2 -20   10.70    1.30
  -2  -2  20   10.30    1.20
   2   2 -20   11.20    1.10
   2   2 -20   10.50    2.00
  -2   2  20   11.50    0.90
  -2   2  20   10.70    1.20
  -2  -2  22    3.90    0.90
  -2  -2  22    2.80    0.80
   2   2 -22    1.40    1.30
   2   2 -22    2.50    0.70
  -2   2  22    2.00    0.70
  -2   2  22    2.00    0.60
   2  -2 -24    2.00    0.80
  -2  -2  24    2.90    0.80
  -2  -2  24    2.00    0.60
   2   2 -24    4.00    0.90
   2   2 -24    2.10    1.50
  -2   2  24    5.80    1.10
  -2   2  24    3.10    0.80
  -2  -2  26   27.50    1.90
  -2  -2  26   23.50    1.60
   2  -2 -26   25.60    1.70
   2   2 -26   22.00    1.60
  -2   2  26   23.60    1.80
  -2   2  26   28.90    1.60
  -2  -2  28   17.60    1.50
   2  -2 -28   13.00    1.50
  -2  -2  28   16.00    1.80
  -2   2  28   15.20    1.50
   2   2 -28   14.60    1.60
  -2   2  28   17.10    1.70
  -2  -2  30    3.00    0.90
  -2  -2  30    3.70    1.00
   2  -2 -30    1.20    1.10
  -2   2  30    6.40    1.60
  -2   2  30    7.20    1.80
  -2  -3 -29    1.00    1.20
   2  -3  29    1.70    0.90
   2   3  29    1.60    1.20
  -2   3 -29    4.60    3.60
  -2   3 -29    1.70    1.00
   2   3  29    3.70    1.00
   2  -3  27    0.40    0.90
  -2  -3 -27   -0.10    1.00
   2  -3  27    1.10    1.00
  -2   3 -27    1.00    0.90
   2   3  27    0.30    1.00
   2  -3  25   14.80    1.40
  -2  -3 -25   10.70    1.50
  -2  -3 -25   14.50    3.10
   2  -3  25   15.10    1.70
  -2   3 -25   16.90    3.70
   2   3  25   12.20    1.50
   2   3  25   10.80    1.40
  -2   3 -25   11.50    1.30
  -2  -3 -23    9.80    1.30
   2  -3  23   10.60    1.50
  -2  -3 -23   13.00    2.70
   2  -3  23   13.40    1.20
   2   3  23   10.60    1.30
  -2   3 -23   13.80    3.20
   2   3  23   13.40    1.50
  -2   3 -23   12.40    1.30
  -2  -3 -21    8.00    1.30
   2  -3  21    9.50    1.00
  -2  -3 -21    9.50    2.40
   2  -3  21   10.10    1.40
  -2   3 -21    8.60    1.30
   2   3  21   10.30    1.30
   2   3  21   11.20    1.40
  -2   3 -21   15.90    2.80
  -2  -3 -19   56.39    3.20
   2  -3  19   58.99    2.60
   2  -3  19   58.59    2.30
  -2  -3 -19   56.49    2.40
  -2   3 -19   59.29    3.70
   2   3  19   57.09    2.50
  -2   3 -19   56.79    2.30
   2   3  19   59.19    2.40
   2  -3  17    9.30    1.10
  -2  -3 -17    8.50    1.90
   2  -3  17    9.30    0.80
  -2  -3 -17    8.80    1.10
  -2   3 -17   10.60    0.90
   2   3  17    8.70    1.10
   2   3  17   10.40    0.90
  -2   3 -17    8.30    1.90
   2  -3  15   36.40    1.70
  -2  -3 -15   39.20    1.70
   2  -3  15   38.60    1.60
  -2  -3 -15   38.20    2.40
   2   3  15   38.50    1.60
  -2   3 -15   35.90    2.50
  -2   3 -15   39.60    1.60
   2   3  15   38.20    1.80
  -2  -3 -13    6.70    1.00
   2  -3  13    6.20    0.90
  -2  -3 -13    7.20    1.90
   2  -3  13    7.00    0.70
   2   3  13    7.00    0.80
  -2   3 -13    8.00    0.80
  -2   3 -13    7.70    1.50
   2   3  13    8.20    1.00
   2  -3  11   16.70    1.30
  -2  -3 -11   17.70    1.20
  -2  -3 -11   17.00    2.90
  -2   3 -11   17.10    1.10
   2   3  11   17.00    1.10
  -2   3 -11   17.20    2.00
   2   3  11   18.20    1.30
   2  -3   9    7.30    0.90
  -2  -3  -9    8.20    1.10
   2  -3   9    7.30    1.10
  -2  -3  -9    6.10    1.70
  -2   3  -9    7.00    1.00
   2   3   9    5.80    1.30
   2   3   9    8.30    1.10
  -2   3  -9    7.70    1.20
  -2  -3  -7   66.49    2.40
  -2  -3  -7   70.49    3.10
   2  -3   7   71.29    2.40
   2  -3   7   68.09    2.30
  -2  -3  -7   68.99    2.50
   2  -3   7   73.99    2.40
  -2  -3  -7   69.79    2.50
  -2   3  -7   69.69    2.50
   2   3   7   68.59    2.60
  -2   3  -7   74.09    2.30
   2   3   7   68.29    3.00
  -2   3  -7   69.29    2.40
   2   3   7   66.39    2.40
  -2   3  -7   72.69    3.10
   2   3   7   71.29    2.50
  -2  -3  -5    7.50    0.80
   2  -3   5    6.50    0.60
  -2  -3  -5    7.10    1.10
  -2  -3  -5    6.00    0.60
  -2  -3  -5    6.50    0.70
   2  -3   5    7.20    0.50
   2   3   5    6.20    0.60
  -2   3  -5    7.80    0.70
   2   3   5    7.30    1.10
   2   3   5    7.10    0.60
  -2   3  -5    7.00    0.60
   2   3   5    7.30    0.80
  -2  -3  -3  400.96   12.30
  -2  -3  -3  393.06   12.20
  -2  -3  -3  404.56   12.30
   2  -3   3  409.26   12.20
   2  -3   3  381.06   12.10
   2  -3   3  406.76   12.20
   2   3   3  415.86   12.90
   2   3   3  398.06   12.40
  -2   3  -3  399.76   12.30
  -2   3  -3  415.06   12.30
  -2   3  -3  410.66   12.30
   2   3   3  397.26   12.40
   2  -3   1   52.19    1.60
  -2  -3  -1   48.70    1.80
  -2  -3  -1   50.39    1.70
   2  -3   1   45.70    1.60
  -2   3  -1   54.09    1.70
   2   3   1   50.39    1.90
   2   3   1   50.29    1.80
  -2  -3   1   54.39    2.00
   2  -3  -1   56.29    1.70
  -2  -3   1   52.79    2.10
  -2  -3   1   52.69    1.90
   2   3  -1   55.49    2.00
  -2   3   1   55.59    1.90
   2   3  -1   55.49    1.90
  -2  -3   3  157.68    5.00
   2  -3  -3  129.79    4.70
  -2  -3   3  159.28    4.90
  -2  -3   3  154.68    4.80
   2  -3  -3  157.48    4.80
   2  -3  -3  162.88    4.70
   2   3  -3  159.08    5.00
   2   3  -3  157.18    5.20
   2   3  -3  165.78    5.10
  -2   3   3  156.88    5.00
  -2  -3   5 1519.85   44.70
   2  -3  -5 1476.65   44.50
  -2  -3   5 1444.36   44.70
  -2  -3   5 1453.65   44.50
   2  -3  -5 1488.55   44.60
   2   3  -5 1438.16   45.40
   2   3  -5 1572.94   45.50
   2   3  -5 1509.45   45.60
  -2   3   5 1507.95   45.30
  -2   3   5 1493.25   45.40
   2  -3  -7  103.39    3.40
  -2  -3   7  109.79    3.60
  -2  -3   7  103.49    3.40
   2  -3  -7  103.89    3.50
   2  -3  -7  108.29    3.30
  -2  -3   7  104.99    3.60
  -2   3   7  111.29    3.40
  -2   3   7  108.69    3.50
  -2   3   7  109.99    3.30
   2   3  -7  102.19    3.70
   2   3  -7  100.79    3.60
   2   3  -7  108.09    3.50
  -2  -3   9   15.60    1.50
   2  -3  -9   12.40    0.70
   2  -3  -9   13.30    0.90
   2  -3  -9   13.10    1.30
  -2  -3   9   13.30    0.90
  -2   3   9   13.30    0.70
  -2   3   9   13.80    1.10
   2   3  -9   11.50    1.40
  -2   3   9   13.20    0.80
  -2   3   9   14.70    0.90
   2   3  -9   13.10    1.00
  -2  -3  11  323.77   10.00
  -2  -3  11  325.27   10.20
   2  -3 -11  315.57    9.90
   2   3 -11  324.47    9.80
  -2   3  11  302.97    9.70
  -2   3  11  325.07    9.90
  -2  -3  13  139.09    4.70
   2  -3 -13  134.99    4.50
  -2  -3  13  142.69    4.60
  -2   3  13  137.29    4.50
  -2   3  13  137.19    4.40
  -2   3  13  130.89    4.30
   2   3 -13  139.99    4.50
  -2   3  13  138.79    4.60
  -2  -3  15   52.09    2.00
  -2  -3  15   50.99    2.20
   2  -3 -15   52.69    2.00
  -2   3  15   52.79    2.10
   2   3 -15   51.29    2.00
  -2   3  15   53.99    2.00
  -2  -3  17   10.10    0.80
   2  -3 -17    9.00    0.90
  -2  -3  17    9.00    1.10
  -2   3  17    9.70    1.00
   2   3 -17    7.10    0.90
  -2   3  17    9.30    0.80
  -2  -3  19   25.70    1.30
   2  -3 -19   27.00    1.40
  -2  -3  19   27.00    1.60
   2   3 -19   27.90    1.50
  -2   3  19   27.00    1.40
   2   3 -19   29.30    2.00
  -2   3  19   27.50    1.60
  -2  -3  21   10.00    1.30
  -2  -3  21    8.10    1.00
   2  -3 -21    9.80    1.10
   2   3 -21    9.20    1.20
   2   3 -21    6.30    2.00
  -2   3  21    7.70    1.00
  -2   3  21    7.50    1.20
  -2  -3  23    2.70    0.90
   2  -3 -23    2.10    0.80
  -2  -3  23    2.20    0.60
   2   3 -23    1.60    1.30
   2  -3 -25    3.20    0.90
  -2  -3  25    4.60    1.20
  -2  -3  25    3.60    0.90
  -2   3  25    4.70    1.20
   2   3 -25    1.90    0.80
  -2   3  25    3.30    0.80
   2  -3 -27   40.30    2.20
  -2  -3  27   47.10    2.40
  -2  -3  27   43.50    2.20
  -2   3  27   46.10    2.10
   2   3 -27   41.50    2.10
  -2   3  27   42.10    2.40
  -2  -3  29   68.89    3.00
  -2  -3  29   69.39    3.20
   2  -3 -29   69.79    3.00
   2   3 -29   71.59    3.10
  -2   3  29   70.69    3.10
  -2   3  29   70.69    3.30
   2  -4  28   21.90    1.90
  -2  -4 -28   18.90    2.10
   2  -4  28   23.40    2.20
   2   4  28   22.70    1.90
  -2   4 -28   20.00    1.70
  -2   4 -28   15.30    2.90
   2   4  28   20.20    2.20
   2  -4  26    3.80    1.00
   2  -4  26    5.10    1.30
  -2   4 -26    1.70    0.80
  -2   4 -26    5.20    2.50
   2   4  26    3.60    0.80
   2  -4  24    1.70    0.80
  -2  -4 -24   -1.80    1.60
  -2  -4 -24   -0.20    0.90
   2  -4  24   -0.40    0.70
   2   4  24    1.70    0.70
   2   4  24    0.20    0.90
  -2   4 -24    2.00    2.10
  -2   4 -24    0.70    0.70
  -2  -4 -22    6.70    1.50
  -2  -4 -22    6.30    1.40
   2   4  22    7.00    1.30
  -2   4 -22    6.10    1.90
   2   4  22    7.10    1.20
  -2   4 -22    6.40    1.10
  -2  -4 -20  213.48    7.20
   2  -4  20  219.58    7.20
   2  -4  20  216.88    7.30
  -2  -4 -20  218.28    8.00
  -2   4 -20  213.48    8.20
   2   4  20  211.38    7.20
  -2   4 -20  213.88    6.90
   2   4  20  206.58    7.00
   2  -4  18   34.60    1.80
  -2  -4 -18   35.90    2.60
  -2  -4 -18   34.10    1.80
   2  -4  18   35.10    1.70
  -2   4 -18   39.50    2.90
   2   4  18   35.90    1.90
  -2   4 -18   36.70    1.70
   2   4  18   36.20    1.70
   2  -4  16   52.89    2.10
  -2  -4 -16   52.69    2.80
   2  -4  16   54.59    2.20
  -2  -4 -16   55.79    2.30
  -2   4 -16   55.89    2.10
  -2   4 -16   56.39    3.10
   2   4  16   54.29    2.20
   2   4  16   52.79    2.30
  -2  -4 -14   38.30    1.70
   2  -4  14   39.20    1.70
   2  -4  14   37.60    1.60
  -2  -4 -14   40.20    2.30
   2   4  14   37.90    1.60
   2   4  14   38.30    1.80
  -2   4 -14   38.50    1.60
  -2   4 -14   41.00    2.50
   2  -4  12  663.73   20.10
  -2  -4 -12  652.83   20.10
   2  -4  12  655.63   20.10
  -2  -4 -12  650.23   20.80
  -2   4 -12  656.93   19.50
   2   4  12  636.94   19.70
   2   4  12  616.54   19.60
  -2   4 -12  649.14   20.40
  -2  -4 -10  437.16   13.40
   2  -4  10  438.06   13.30
  -2  -4 -10  406.36   15.00
   2  -4  10  444.76   13.40
   2   4  10  430.06   13.30
   2   4  10  430.86   13.20
  -2   4 -10  427.66   13.30
  -2   4 -10  396.36   13.20
  -2   4 -10  446.36   13.10
  -2  -4  -8  203.08    6.50
   2  -4   8  199.08    6.40
   2  -4   8  201.68    6.40
  -2   4  -8  191.48    6.10
   2   4   8  205.18    6.20
   2   4   8  186.28    7.10
  -2   4  -8  197.88    6.10
   2   4   8  197.28    6.40
  -2   4  -8  178.68    6.20
   2  -4   6    1.00    0.40
  -2  -4  -6    0.90    0.40
   2  -4   6    0.60    0.60
  -2  -4  -6    1.30    0.70
   2  -4   6    0.80    0.30
  -2  -4  -6    0.80    0.60
   2   4   6    1.10    0.60
   2   4   6    1.50    0.80
   2   4   6    0.80    0.60
  -2   4  -6    1.20    0.40
  -2   4  -6    1.10    0.40
   2   4   6    1.50    0.40
  -2   4  -6    0.90    0.60
  -2  -4  -4   10.90    1.00
   2  -4   4   10.30    0.70
  -2  -4  -4   10.00    0.90
   2  -4   4   10.80    0.80
   2  -4   4   10.70    0.60
  -2  -4  -4    9.80    0.80
   2   4   4   12.00    1.50
   2   4   4   11.30    0.90
  -2   4  -4   11.30    0.60
  -2   4  -4   12.20    0.80
   2   4   4   11.20    0.90
  -2   4  -4   12.20    0.60
   2   4   4   10.90    1.00
  -2  -4  -2  411.16   12.80
  -2  -4  -2  420.56   12.80
  -2  -4  -2  417.86   12.80
   2  -4   2  419.56   12.70
   2  -4   2  411.46   12.60
   2   4   2  412.16   12.80
  -2   4  -2  408.86   12.60
  -2   4  -2  431.66   12.70
   2   4   2  413.56   12.80
  -2   4  -2  420.46   12.60
   2  -4   0  719.23   21.90
   2  -4   0  710.43   21.90
  -2  -4   0  735.33   22.10
  -2  -4   0  738.93   22.10
   2   4   0  725.63   21.80
   2   4   0  730.23   21.80
  -2   4   0  691.23   21.60
   2  -4  -2  425.16   13.10
   2  -4  -2  435.76   13.20
  -2  -4   2  435.36   13.40
   2  -4  -2  434.26   13.10
  -2  -4   2  429.36   13.30
  -2  -4   2  438.06   13.30
  -2   4   2  413.96   12.80
   2   4  -2  435.06   13.10
  -2   4   2  419.46   12.90
  -2   4   2  425.36   12.80
   2   4  -2  429.26   13.00
  -2  -4   4 1021.50   31.10
   2  -4  -4 1017.10   30.90
  -2  -4   4  989.90   30.90
   2  -4  -4 1027.30   30.80
  -2  -4   4 1058.39   31.10
   2  -4  -4 1019.80   30.90
  -2   4   4 1013.10   30.80
  -2   4   4  975.20   30.80
   2   4  -4 1024.40   31.10
   2   4  -4 1063.09   31.10
   2   4  -4 1035.80   30.90
  -2  -4   6    9.80    0.80
   2  -4  -6   10.00    0.90
  -2  -4   6   11.00    1.10
   2  -4  -6   11.10    0.70
   2  -4  -6    9.30    0.70
  -2  -4   6   10.80    1.10
  -2   4   6   11.10    0.50
   2   4  -6    9.20    0.80
  -2   4   6   10.80    0.80
   2   4  -6   10.40    1.00
   2   4  -6   10.50    1.20
  -2   4   6    9.70    0.60
   2  -4  -8  658.43   20.40
  -2  -4   8  668.43   20.50
   2  -4  -8  644.44   20.30
  -2  -4   8  674.53   20.80
   2  -4  -8  698.63   20.30
  -2   4   8  670.03   20.10
  -2   4   8  677.23   20.10
   2   4  -8  649.14   20.40
  -2   4   8  648.54   20.00
  -2  -4  10   98.09    3.30
  -2  -4  10   95.79    3.80
   2  -4 -10   95.69    3.20
   2  -4 -10   90.29    3.30
  -2   4  10   95.29    3.30
  -2   4  10   94.79    3.10
  -2   4  10   97.39    3.30
  -2   4  10   95.59    3.20
   2   4 -10   96.99    3.30
  -2  -4  12   32.40    1.50
  -2  -4  12   33.80    1.80
   2  -4 -12   31.90    1.40
  -2   4  12   30.00    1.20
  -2   4  12   30.50    1.50
  -2   4  12   33.70    1.30
   2   4 -12   33.40    1.40
  -2   4  12   33.00    1.60
   2  -4 -14    5.50    0.90
  -2  -4  14    6.40    0.60
  -2  -4  14    5.70    1.00
  -2   4  14    6.20    0.80
   2   4 -14    5.40    0.80
  -2   4  14    6.20    1.00
  -2   4  14    5.40    0.60
  -2   4  14    6.40    0.60
  -2  -4  16   14.20    0.90
   2  -4 -16   14.10    0.90
  -2  -4  16   14.60    1.20
  -2   4  16   13.90    1.10
  -2   4  16   14.40    0.90
   2   4 -16   13.50    1.00
  -2   4  16   14.60    1.10
  -2  -4  18    1.50    0.50
  -2  -4  18    3.80    1.10
   2  -4 -18    2.40    0.60
  -2   4  18    3.30    0.90
   2   4 -18    3.60    0.90
  -2   4  18    2.90    0.70
  -2  -4  20   10.20    1.00
  -2  -4  20    8.80    1.30
   2  -4 -20    9.90    1.10
  -2   4  20    9.60    1.00
  -2   4  20   10.00    1.20
   2   4 -20   11.40    1.80
   2   4 -20    8.20    1.20
  -2  -4  22    6.10    0.90
   2  -4 -22    5.00    1.20
   2   4 -22    3.90    1.30
  -2   4  22    6.00    1.10
  -2  -4  24   -0.60    0.80
   2  -4 -24   -0.90    0.80
  -2  -4  24    0.30    0.60
   2   4 -24   -0.40    0.70
  -2   4  24   -0.30    0.60
  -2   4  24    0.50    0.70
   2  -4 -26    2.40    0.90
  -2  -4  26    3.30    0.90
  -2  -4  26    2.10    0.80
  -2   4  26    1.70    0.90
   2   4 -26    1.10    0.80
  -2  -4  28   20.50    1.70
  -2  -4  28   19.40    1.90
   2  -4 -28   14.50    1.70
  -2   4  28   19.60    1.80
  -2   4  28   18.10    1.60
   2   4 -28   15.30    1.60
  -2  -4  30   29.00    2.20
   2  -4 -30   35.20    2.20
  -2   4  30   38.30    2.40
   2   4 -30   31.30    2.10
   2  -5  27    1.70    1.00
   2  -5  27    0.80    0.90
  -2  -5 -27    3.40    1.20
   2   5  27    2.10    1.00
   2   5  27    2.70    1.10
  -2   5 -27    0.40    0.90
  -2   5 -27   -1.70    2.70
   2  -5  25    3.10    0.90
  -2  -5 -25    2.90    1.10
   2  -5  25    1.90    0.80
   2   5  25    2.60    0.80
   2   5  25    1.80    1.00
  -2   5 -25    2.10    0.80
  -2   5 -25    0.60    2.40
  -2  -5 -23   10.80    1.60
   2  -5  23    9.10    1.30
   2  -5  23   11.90    1.50
  -2   5 -23   10.80    1.20
   2   5  23   10.40    1.60
  -2   5 -23    8.70    2.20
   2  -5  21   78.59    3.10
   2  -5  21   79.79    3.20
  -2  -5 -21   84.59    4.00
  -2   5 -21   78.69    4.60
  -2   5 -21   81.99    3.00
   2   5  21   78.59    3.40
  -2  -5 -19   25.20    1.80
   2  -5  19   24.00    1.40
  -2  -5 -19   27.00    2.50
   2  -5  19   27.00    1.70
   2   5  19   24.30    1.50
  -2   5 -19   28.30    2.90
   2   5  19   26.30    1.70
  -2   5 -19   23.70    1.50
   2  -5  17  296.77    9.60
   2  -5  17  302.77    9.50
  -2  -5 -17  296.77    9.60
  -2   5 -17  299.47    9.20
  -2   5 -17  285.47   10.30
   2   5  17  288.17    9.40
   2   5  17  297.17    9.50
  -2  -5 -15   45.10    2.00
   2  -5  15   41.20    1.80
   2  -5  15   42.10    1.90
   2   5  15   41.10    1.80
  -2   5 -15   43.90    1.70
  -2   5 -15   42.20    2.60
   2   5  15   42.10    2.00
  -2  -5 -13    3.60    0.90
   2  -5  13    3.30    0.80
   2  -5  13    4.00    0.60
   2   5  13    4.20    0.70
   2   5  13    3.10    0.90
  -2   5 -13    2.60    0.90
  -2   5 -13    4.10    0.70
  -2  -5 -11    7.10    1.00
   2  -5  11    8.90    1.10
   2  -5  11    7.40    0.90
   2   5  11    7.70    0.90
  -2   5 -11    6.50    0.70
   2   5  11    7.10    0.80
   2  -5   9    7.50    0.90
  -2  -5  -9    7.20    1.10
   2  -5   9    6.10    0.90
  -2   5  -9    6.80    1.00
   2   5   9    6.50    0.80
   2   5   9    6.60    1.20
  -2   5  -9    6.30    1.10
  -2   5  -9    6.80    0.80
   2  -5   7  452.85   14.00
  -2  -5  -7  467.05   14.00
   2  -5   7  456.85   13.80
  -2  -5  -7  432.26   13.90
  -2   5  -7  445.56   14.00
   2   5   7  459.05   14.10
  -2   5  -7  439.96   13.80
   2   5   7  466.55   14.00
   2  -5   5   84.69    2.70
  -2  -5  -5   84.49    2.90
   2  -5   5   77.89    2.70
   2  -5   5   84.29    3.00
  -2   5  -5   85.59    2.80
  -2   5  -5   84.79    2.90
   2   5   5   86.69    3.10
   2   5   5   81.19    3.20
  -2   5  -5   85.99    2.80
   2  -5   3 1060.59   33.30
  -2  -5  -3 1116.09   33.50
  -2  -5  -3 1124.39   33.50
  -2  -5  -3 1088.29   33.60
   2  -5   3 1129.69   33.30
   2  -5   3 1107.49   33.40
   2   5   3 1092.39   33.10
  -2   5  -3 1094.39   32.90
  -2   5  -3 1130.19   33.00
  -2   5  -3 1057.89   32.90
   2   5   3 1084.69   33.10
   2  -5   1   14.20    0.70
  -2  -5  -1   14.20    0.80
  -2  -5  -1   13.70    1.20
   2  -5   1   13.00    0.90
   2   5   1   14.20    1.00
   2   5   1   12.60    1.00
  -2   5  -1   13.30    0.60
  -2   5  -1   14.00    0.70
   2  -5  -1   94.19    3.00
   2  -5  -1   92.39    3.00
  -2  -5   1   91.49    3.30
  -2  -5   1   94.59    3.30
  -2  -5   1   88.59    3.10
   2   5  -1   91.59    3.20
  -2   5   1   93.49    3.00
   2   5  -1   91.19    3.20
  -2   5   1   96.59    2.90
  -2  -5   3   40.80    1.90
   2  -5  -3   38.80    1.50
  -2  -5   3   38.60    1.60
   2  -5  -3   42.30    1.50
  -2  -5   3   40.50    1.90
   2  -5  -3   40.70    1.50
  -2   5   3   41.40    1.40
   2   5  -3   40.20    1.70
   2   5  -3   41.30    1.70
   2   5  -3   41.00    1.80
  -2   5   3   42.50    1.40
  -2   5   3   41.30    1.40
   2  -5  -5   45.50    1.80
  -2  -5   5   43.10    2.10
   2  -5  -5   44.10    1.70
   2  -5  -5   47.90    1.70
  -2   5   5   47.20    1.60
  -2   5   5   45.10    1.60
  -2   5   5   47.30    1.50
   2   5  -5   42.90    2.10
   2  -5  -7   45.90    1.70
  -2  -5   7   48.40    2.30
   2  -5  -7   47.50    2.00
  -2  -5   7   48.30    2.30
   2  -5  -7   49.80    1.80
  -2   5   7   49.00    1.80
   2   5  -7   47.90    2.00
  -2   5   7   50.19    1.80
   2   5  -7   45.20    2.30
  -2   5   7   51.79    1.70
   2  -5  -9    6.20    0.80
   2  -5  -9    6.20    1.10
  -2  -5   9    5.90    1.30
  -2   5   9    6.40    0.90
   2   5  -9    6.40    1.00
  -2   5   9    7.00    0.80
  -2   5   9    6.20    0.60
  -2  -5  11    3.70    0.70
   2  -5 -11    5.60    0.90
  -2  -5  11    5.20    1.20
   2   5 -11    4.70    0.80
  -2   5  11    5.00    0.90
  -2   5  11    5.00    0.60
  -2   5  11    4.00    0.50
  -2  -5  13   88.09    3.30
  -2  -5  13   90.19    3.20
  -2   5  13   88.69    2.90
  -2   5  13   87.29    3.00
   2   5 -13   85.49    2.90
  -2   5  13   81.09    2.80
  -2   5  13   83.79    3.20
   2  -5 -15   20.50    1.10
  -2  -5  15   21.00    1.40
  -2  -5  15   20.40    1.20
  -2   5  15   19.60    1.00
  -2   5  15   16.70    0.90
   2   5 -15   20.10    1.20
  -2   5  15   21.70    1.10
  -2   5  15   19.80    1.40
  -2  -5  17   20.60    1.20
  -2  -5  17   19.80    1.40
   2  -5 -17   17.60    1.20
  -2   5  17   18.90    1.20
   2   5 -17   19.40    1.20
  -2   5  17   18.60    1.10
  -2   5  17   15.60    1.40
   2  -5 -19   37.50    1.80
  -2  -5  19   35.90    1.70
  -2  -5  19   37.90    2.00
  -2   5  19   35.30    1.80
   2   5 -19   37.00    1.70
  -2   5  19   37.50    1.70
   2  -5 -21   15.00    1.30
  -2  -5  21   11.00    1.40
  -2   5  21   11.60    1.30
  -2   5  21   12.40    1.10
  -2  -5  23    4.90    1.00
   2  -5 -23    4.40    0.90
  -2  -5  23    3.20    0.90
   2   5 -23    5.20    1.50
  -2   5  23    5.20    1.30
   2   5 -23    5.50    1.10
  -2   5  23    4.70    0.70
  -2  -5  25   13.80    1.60
  -2  -5  25   11.20    1.30
   2  -5 -25   14.70    1.40
   2   5 -25   11.10    1.30
   2   5 -25   15.60    3.00
  -2   5  25   15.60    1.40
  -2   5  25   14.40    1.50
   2  -5 -27   15.80    1.70
  -2  -5  27   21.40    1.60
  -2  -5  27   20.80    1.90
   2   5 -27   19.00    1.50
  -2   5  27   16.00    1.60
  -2   5  27   18.80    1.70
   2  -5 -29    4.50    1.20
  -2  -5  29    3.30    0.90
  -2  -5  29    3.70    1.10
   2   5 -29    2.30    1.00
  -2   5  29    2.40    1.00
  -2   5  29    1.20    1.00
  -2  -6 -28   10.10    2.30
   2  -6  28    9.50    1.80
   2  -6  28    7.60    2.00
  -2   6 -28    4.50    3.10
   2   6  28    9.40    2.20
   2   6  28    5.10    1.00
  -2  -6 -26    1.00    1.20
   2  -6  26    4.00    0.90
   2  -6  26    3.20    1.00
   2   6  26    5.10    1.10
   2   6  26    3.80    0.90
  -2   6 -26    3.90    2.40
   2  -6  24   22.90    2.00
  -2  -6 -24   25.30    1.90
   2  -6  24   24.90    1.70
   2   6  24   21.90    1.70
  -2   6 -24   22.20    4.00
   2   6  24   28.30    2.00
  -2   6 -24   23.90    1.50
   2  -6  22   44.00    2.10
  -2  -6 -22   42.90    2.40
   2   6  22   43.50    2.20
  -2   6 -22   46.00    2.10
   2   6  22   46.20    2.40
   2  -6  20   12.70    1.20
   2  -6  20   12.40    1.40
   2   6  20   14.70    1.50
   2   6  20   10.30    1.20
  -2   6 -20   10.60    1.30
  -2   6 -20   15.20    2.60
   2  -6  18   37.60    1.90
  -2  -6 -18   39.40    2.10
   2  -6  18   37.80    1.80
  -2   6 -18   37.50    3.00
   2   6  18   38.10    1.80
   2   6  18   38.30    2.10
  -2   6 -18   38.50    1.70
   2  -6  16    7.90    1.10
  -2  -6 -16    8.50    1.30
   2  -6  16    7.50    1.00
   2   6  16    7.70    1.20
   2   6  16    8.80    1.00
  -2   6 -16   12.90    2.10
  -2   6 -16   10.20    1.00
   2  -6  14   78.99    2.80
   2  -6  14   77.79    2.90
  -2  -6 -14   76.29    3.00
   2   6  14   76.89    2.90
  -2   6 -14   76.79    2.70
   2   6  14   72.19    2.80
   2  -6  12    3.00    0.70
  -2  -6 -12    1.70    0.60
   2  -6  12    3.00    0.80
   2   6  12    2.30    0.50
  -2   6 -12    1.80    0.40
   2   6  12    1.90    0.50
   2  -6  10   51.19    2.10
  -2  -6 -10   52.19    2.10
   2  -6  10   49.50    2.00
   2   6  10   51.79    2.00
   2   6  10   50.09    2.00
  -2   6 -10   51.29    1.80
  -2   6 -10   44.20    1.90
  -2   6 -10   46.30    2.10
  -2  -6  -8   18.70    1.20
   2  -6   8   18.60    1.00
   2  -6   8   18.60    1.40
  -2   6  -8   18.60    0.90
  -2   6  -8   17.60    1.20
  -2   6  -8   17.10    1.10
   2   6   8   17.30    1.60
   2   6   8   16.70    1.10
   2  -6   6  103.19    3.60
  -2  -6  -6  105.19    3.70
  -2  -6  -6  100.89    3.50
   2  -6   6  103.89    3.30
   2   6   6  103.99    3.70
  -2   6  -6  102.69    3.40
  -2   6  -6  101.19    3.50
  -2   6  -6   99.79    3.40
   2   6   6  102.69    3.50
   2  -6   4   66.29    2.20
  -2  -6  -4   67.59    2.70
   2  -6   4   64.59    2.50
  -2  -6  -4   65.09    2.50
   2   6   4   68.59    2.60
  -2   6  -4   66.69    2.40
  -2   6  -4   68.49    2.30
  -2   6  -4   68.09    2.30
   2  -6   2   78.69    2.80
  -2  -6  -2   76.39    2.80
   2  -6   2   74.19    2.50
  -2  -6  -2   77.29    3.20
   2   6   2   82.99    3.00
  -2   6  -2   82.89    2.80
  -2   6  -2   80.19    2.60
   2  -6   0   91.79    3.00
   2  -6   0   95.59    3.10
  -2  -6   0   86.79    3.30
  -2   6   0   98.19    3.20
   2   6   0  100.59    3.40
  -2   6   0   96.99    3.10
  -2  -6   2  232.68    7.60
   2  -6  -2  229.18    7.10
   2  -6  -2  220.58    7.10
  -2  -6   2  226.68    7.30
  -2   6   2  236.98    7.30
   2   6  -2  242.28    7.60
  -2   6   2  237.78    7.30
  -2  -6   4  112.49    3.90
  -2  -6   4  113.59    4.00
   2  -6  -4  102.49    3.60
   2  -6  -4  112.69    3.70
   2  -6  -4  112.09    3.60
  -2   6   4  112.99    3.60
  -2   6   4  118.39    3.60
   2   6  -4  112.09    3.80
  -2   6   4  114.09    3.50
   2   6  -4  106.19    3.90
  -2  -6   6   19.80    1.50
  -2  -6   6   19.90    1.60
   2  -6  -6   19.90    1.20
   2  -6  -6   20.20    1.20
  -2   6   6   20.00    0.90
   2   6  -6   21.20    1.20
   2   6  -6   20.40    1.60
  -2   6   6   20.30    1.00
  -2   6   6   19.80    1.00
  -2  -6   8   25.50    1.70
   2  -6  -8   25.20    1.20
  -2  -6   8   24.50    1.60
   2  -6  -8   24.50    1.30
  -2   6   8   24.20    1.30
  -2   6   8   25.80    1.00
  -2   6   8   24.60    1.10
   2   6  -8   25.30    1.30
   2  -6 -10   15.80    1.00
  -2  -6  10   17.10    1.30
  -2  -6  10   16.80    1.40
   2  -6 -10   17.00    1.10
  -2   6  10   17.20    1.10
  -2   6  10   16.80    0.90
  -2   6  10   16.30    0.80
   2   6 -10   17.70    1.10
  -2  -6  12    0.50    0.50
  -2   6  12    1.30    0.50
   2   6 -12    1.60    0.50
  -2   6  12    0.40    0.70
  -2   6  12    1.10    0.30
  -2   6  12    1.50    0.40
  -2  -6  14    9.10    1.00
   2  -6 -14    9.20    0.90
  -2  -6  14   10.30    0.90
   2   6 -14    9.40    0.90
  -2   6  14    8.60    0.80
  -2   6  14    9.10    0.80
  -2   6  14    9.30    1.30
  -2  -6  16    4.50    0.80
  -2  -6  16    4.80    1.00
  -2   6  16    7.90    0.90
   2   6 -16    6.40    1.00
  -2   6  16    6.60    0.80
  -2  -6  18   70.29    2.90
   2  -6 -18   69.19    2.70
  -2  -6  18   71.89    2.80
   2   6 -18   71.69    2.70
  -2   6  18   70.99    2.80
  -2   6  18   69.89    2.60
  -2  -6  20    5.60    1.30
   2  -6 -20    4.90    1.20
  -2   6  20    7.10    1.00
  -2   6  20    8.00    1.20
   2  -6 -22   -0.50    0.80
  -2  -6  22    0.10    0.70
  -2   6  22    1.40    0.80
   2   6 -22   -1.20    0.70
  -2  -6  24    6.70    1.10
  -2  -6  24    7.20    1.60
  -2   6  24    5.20    0.80
   2   6 -24    7.30    1.10
  -2   6  24    7.10    1.40
   2   6 -24    2.70    1.70
   2  -6 -26    3.40    1.10
  -2  -6  26    5.30    0.80
  -2  -6  26    6.80    1.60
   2   6 -26    2.60    0.90
  -2   6  26    1.90    0.90
  -2   6  26    3.40    0.90
   2  -6 -28   25.10    2.10
  -2  -6  28   24.00    2.10
  -2  -6  28   19.70    1.70
   2   6 -28   25.00    1.70
  -2   6  28   24.20    1.80
  -2   6  28   18.90    2.00
   2  -7  27    0.80    1.10
  -2  -7 -27   -0.50    1.30
   2  -7  27    0.20    1.00
  -2   7 -27   -2.20    3.00
   2   7  27    2.80    1.20
   2   7  27    0.80    1.10
  -2   7 -27    3.00    0.90
  -2  -7 -25    0.50    1.30
   2  -7  25    1.90    0.80
   2  -7  25    1.60    1.00
  -2   7 -25    1.40    2.30
  -2   7 -25    0.40    0.80
   2   7  25    0.70    0.90
   2  -7  23    9.90    1.50
  -2  -7 -23    7.30    1.60
   2  -7  23    6.30    1.20
  -2   7 -23   13.40    3.80
   2   7  23    7.70    1.70
   2   7  23    8.80    1.40
  -2   7 -23    4.90    1.30
   2  -7  21    4.60    1.10
  -2  -7 -21    4.20    1.10
   2  -7  21    5.60    1.40
   2   7  21    6.30    1.30
  -2   7 -21    5.50    1.20
  -2   7 -21    6.30    2.00
   2   7  21    6.20    1.30
   2  -7  19    2.80    0.70
   2  -7  19    3.10    0.70
  -2   7 -19    3.90    1.50
   2   7  19    5.20    1.30
   2   7  19    4.20    1.10
  -2  -7 -17   81.09    3.30
   2  -7  17   81.29    3.10
   2  -7  17   81.39    3.10
  -2   7 -17   81.19    4.10
  -2   7 -17   83.39    2.90
   2   7  17   80.09    3.30
   2   7  17   80.09    3.10
   2  -7  15   88.79    3.20
  -2  -7 -15   80.89    3.30
   2  -7  15   89.09    3.20
   2   7  15   82.79    3.20
   2   7  15   83.99    3.30
  -2   7 -15   86.09    3.00
  -2  -7 -13    4.30    0.80
   2  -7  13    3.10    0.80
   2  -7  13    4.30    0.80
   2   7  13    3.20    0.60
  -2   7 -13    3.60    0.70
   2   7  13    3.00    0.60
   2  -7  11    5.30    0.70
  -2  -7 -11    5.30    1.00
   2   7  11    4.00    0.80
   2   7  11    6.00    0.90
  -2   7 -11    4.50    0.60
   2  -7   9    5.00    0.70
  -2   7  -9    5.00    0.60
  -2   7  -9    4.30    1.10
   2   7   9    3.50    0.60
  -2   7  -9    2.60    0.60
   2   7   9    4.40    0.80
   2  -7   7    3.50    0.60
  -2  -7  -7    2.60    0.70
   2  -7   7    2.90    0.80
   2   7   7    2.70    0.50
  -2   7  -7    2.80    0.70
  -2   7  -7    3.70    0.50
  -2   7  -7    3.80    0.80
  -2  -7  -5    4.50    0.80
  -2  -7  -5    4.30    1.10
   2  -7   5    4.30    0.50
   2  -7   5    4.10    0.90
  -2   7  -5    5.20    0.70
  -2   7  -5    3.60    0.90
  -2   7  -5    4.20    0.70
   2   7   5    3.50    0.70
  -2  -7  -3   37.80    1.70
   2  -7   3   39.30    1.70
  -2  -7  -3   40.30    1.90
   2   7   3   40.20    1.70
  -2   7  -3   38.70    1.60
  -2  -7  -1   10.50    1.10
  -2  -7  -1   10.70    1.30
   2  -7   1   12.40    1.00
   2   7   1   11.40    1.00
  -2   7  -1   11.10    0.80
  -2   7  -1   11.80    0.90
  -2  -7   1   26.20    1.70
  -2  -7   1   26.40    1.60
   2  -7  -1   25.20    1.30
   2   7  -1   23.90    1.30
  -2   7   1   27.30    1.10
  -2   7   1   26.20    1.10
  -2  -7   3  234.58    7.60
  -2  -7   3  233.08    7.40
   2  -7  -3  229.48    7.30
  -2   7   3  236.48    7.10
   2   7  -3  226.58    7.30
  -2   7   3  229.98    7.10
   2  -7  -5    1.80    0.50
  -2  -7   5    2.10    0.70
  -2  -7   5    1.40    0.60
   2  -7  -5    3.40    0.80
   2   7  -5    2.10    0.50
  -2   7   5    1.70    0.30
  -2   7   5    1.50    0.40
   2   7  -5    1.50    0.80
  -2   7   5    1.60    0.30
  -2  -7   7    2.00    0.60
   2  -7  -7    0.90    0.50
  -2  -7   7    1.00    0.70
   2  -7  -7    0.00    0.50
   2   7  -7    0.70    0.50
  -2   7   7    1.10    0.30
  -2   7   7    1.30    0.30
   2   7  -7    1.40    0.70
  -2  -7   9   17.10    1.40
   2  -7  -9   13.50    1.20
  -2  -7   9   18.30    1.40
   2  -7  -9   16.30    1.10
  -2   7   9   15.60    0.80
  -2   7   9   16.50    0.90
  -2   7   9   16.90    0.90
   2   7  -9   16.60    1.00
  -2  -7  11   36.40    1.70
  -2  -7  11   36.30    1.90
  -2   7  11   33.90    1.40
  -2   7  11   33.70    1.30
   2   7 -11   35.80    1.50
   2  -7 -13   12.10    1.00
  -2  -7  13   10.60    1.10
  -2   7  13   12.50    0.80
  -2   7  13   12.60    0.90
  -2   7  13   11.30    0.70
   2   7 -13   11.10    1.00
  -2  -7  15   19.40    1.40
   2  -7 -15   19.30    1.30
  -2  -7  15   20.00    1.20
   2   7 -15   20.30    1.30
  -2   7  15   20.30    1.10
  -2   7  15   19.60    1.20
  -2  -7  17   13.30    1.10
   2  -7 -17   14.50    1.30
  -2  -7  17   15.20    1.40
  -2   7  17   14.90    1.10
  -2   7  17   14.00    1.00
   2   7 -17   12.70    1.20
  -2  -7  19  116.59    4.20
   2  -7 -19  114.99    4.10
  -2   7  19  112.69    4.10
  -2   7  19  115.69    4.00
   2  -7 -21   54.09    2.50
  -2  -7  21   56.09    2.50
  -2  -7  21   57.29    2.40
  -2   7  21   57.79    2.60
   2   7 -21   57.99    2.40
  -2   7  21   53.59    2.40
  -2  -7  23    1.40    0.70
  -2  -7  23    1.40    0.80
  -2   7  23    2.00    0.80
  -2   7  23    2.20    0.70
  -2  -7  25    2.00    0.90
  -2  -7  25    2.30    0.80
   2  -7 -25    0.60    1.00
   2   7 -25    1.00    0.90
   2   7 -25    0.50    1.80
  -2   7  25    2.40    0.80
  -2   7  25    1.20    0.90
   2  -7 -27    1.30    1.20
  -2  -7  27    2.10    0.90
  -2   7  27   -0.50    1.00
  -2   7  27    1.60    0.90
   2   7 -27    2.70    0.90
  -2  -8 -26   -0.60    1.50
   2  -8  26    0.80    1.00
   2  -8  26    1.20    1.10
   2   8  26    0.20    1.10
  -2   8 -26    0.60    0.90
  -2   8 -26    1.00    3.00
   2   8  26    1.20    1.30
   2  -8  24    9.10    1.80
  -2  -8 -24    4.30    1.40
   2  -8  24    6.30    1.50
   2   8  24    8.60    1.60
  -2   8 -24    2.60    2.60
  -2   8 -24    4.40    0.90
   2   8  24    5.80    1.20
  -2  -8 -22    0.70    1.20
  -2   8 -22    0.90    1.90
   2   8  22    0.20    0.90
   2   8  22    0.60    0.80
  -2   8 -22    0.00    0.70
  -2  -8 -20    9.20    1.80
   2  -8  20   12.80    1.40
   2   8  20   13.50    1.40
  -2   8 -20   15.90    3.20
  -2   8 -20   13.20    1.20
   2  -8  18    7.00    1.20
   2  -8  18    9.30    1.20
   2   8  18   11.10    1.30
   2   8  18   11.50    1.50
   2  -8  16   68.59    2.70
  -2  -8 -16   70.59    3.00
   2  -8  16   70.39    2.70
   2   8  16   69.89    2.90
  -2   8 -16   72.49    2.60
   2   8  16   66.79    2.70
   2  -8  14    1.30    0.50
  -2  -8 -14    1.30    0.80
   2  -8  14    3.10    0.80
  -2   8 -14    1.40    0.50
   2   8  14    0.80    0.60
   2   8  14    1.70    0.70
   2  -8  12    4.40    0.80
   2  -8  12    4.60    0.90
  -2   8 -12    3.00    0.70
   2   8  12    4.00    0.90
   2   8  12    3.60    0.70
   2  -8  10   12.30    1.20
  -2  -8 -10   14.40    1.30
   2  -8  10   12.60    0.90
   2   8  10   12.10    1.10
  -2   8 -10   13.20    0.80
   2   8  10   12.20    1.00
  -2  -8  -8   10.70    1.20
   2  -8   8   10.60    0.70
  -2   8  -8    8.00    1.00
  -2   8  -8   11.30    0.70
  -2   8  -8    9.60    1.20
   2   8   8   11.00    0.90
   2  -8   6   10.10    0.60
  -2  -8  -6    8.40    1.10
  -2   8  -6    8.10    0.80
  -2   8  -6   10.30    1.10
   2   8   6    8.70    0.90
  -2   8  -6    9.20    0.70
  -2  -8  -4  233.58    7.50
   2  -8   4  235.08    7.60
  -2  -8  -4  243.38    7.70
  -2   8  -4  242.88    7.70
   2   8   4  244.68    7.80
  -2   8  -4  245.28    7.50
  -2  -8  -2   -0.60    0.50
   2  -8   2    0.60    0.50
  -2  -8  -2    0.20    0.60
   2   8   2   -0.60    0.40
  -2  -8   0    2.60    0.70
  -2  -8   0    3.60    0.90
  -2  -8   0    4.70    1.10
   2  -8   0    2.10    0.50
   2   8   0    4.30    0.70
  -2   8   0    2.70    0.50
  -2   8   0    3.60    0.70
  -2  -8   2   70.69    2.70
  -2  -8   2   68.79    2.60
   2  -8  -2   66.69    2.50
  -2   8   2   69.69    2.40
   2   8  -2   68.99    2.50
  -2  -8   4   13.10    1.10
  -2  -8   4   12.10    1.20
   2  -8  -4   12.20    1.00
  -2   8   4   12.20    0.80
  -2   8   4   12.10    0.70
   2   8  -4   11.90    0.90
  -2  -8   6    2.70    0.70
   2  -8  -6    2.00    0.50
   2  -8  -6    2.90    0.60
  -2  -8   6    2.80    0.70
   2   8  -6    2.40    0.80
  -2   8   6    3.40    0.50
  -2   8   6    2.70    0.50
  -2   8   6    4.10    0.60
   2   8  -6    2.20    0.50
  -2  -8   8   17.50    1.40
   2  -8  -8   20.40    1.30
   2  -8  -8   19.00    1.20
  -2   8   8   20.90    1.00
  -2   8   8   19.90    0.90
  -2   8   8   18.80    0.90
   2   8  -8   19.20    1.10
  -2  -8  10   12.10    1.10
  -2  -8  10   13.20    1.30
   2  -8 -10   14.50    1.40
   2   8 -10   15.00    1.00
  -2   8  10   13.50    0.80
  -2   8  10   12.40    0.80
  -2   8  10   14.00    1.00
  -2  -8  12   11.50    1.20
   2  -8 -12   12.80    1.10
  -2  -8  12   11.70    1.40
  -2   8  12   12.20    0.90
   2   8 -12   10.40    1.00
  -2   8  12   12.10    0.80
  -2   8  12    9.80    0.70
  -2  -8  14   46.20    2.10
   2  -8 -14   46.20    2.00
   2   8 -14   46.90    2.00
  -2   8  14   47.30    1.90
  -2   8  14   46.00    1.80
   2  -8 -16   13.00    1.20
  -2  -8  16   12.10    1.30
  -2  -8  16   12.10    1.10
  -2   8  16   11.70    1.00
   2   8 -16   12.40    1.10
  -2   8  16   12.10    1.00
   2  -8 -18   22.30    1.50
  -2  -8  18   20.70    1.60
  -2   8  18   19.90    1.30
  -2   8  18   23.00    1.30
   2   8 -18   21.90    1.40
  -2  -8  20    9.20    1.20
   2  -8 -20    6.90    1.40
  -2  -8  20    9.80    1.30
   2   8 -20    8.80    1.20
  -2   8  20    6.60    1.00
  -2   8  20    8.50    1.10
   2  -8 -22   17.40    1.70
  -2  -8  22   17.50    1.50
  -2  -8  22   19.70    1.60
   2   8 -22   16.10    1.40
  -2   8  22   19.60    1.40
  -2  -8  24    3.70    1.00
  -2  -8  24    4.20    0.80
   2  -8 -24    3.30    1.10
   2   8 -24    2.70    0.90
  -2   8  24    3.80    0.90
  -2   8  24    3.60    0.90
  -2  -8  26    1.30    1.00
  -2  -8  26    1.70    1.00
   2  -8 -26   -0.60    1.20
  -2   8  26    3.40    1.00
   2   8 -26    2.70    1.00
  -2   8  26    0.80    1.00
   2   8 -26    2.20    2.40
   2  -9  25    6.90    1.70
  -2   9 -25    5.00    2.70
   2   9  25    2.70    1.10
  -2   9 -25    2.40    1.00
  -2  -9 -23    4.20    1.30
   2  -9  23    5.10    0.90
   2  -9  23    6.60    1.70
  -2   9 -23    7.40    2.50
   2   9  23    7.80    2.00
   2   9  23    4.30    1.00
  -2   9 -23    5.80    1.20
   2  -9  21    6.30    1.40
  -2  -9 -21    3.30    1.20
   2  -9  21    4.70    0.90
   2   9  21    4.70    1.10
  -2   9 -21    3.60    0.70
   2  -9  19    4.70    1.30
  -2  -9 -19    2.00    1.10
  -2   9 -19    4.10    1.70
   2   9  19    3.10    0.80
   2   9  19    3.40    1.10
   2  -9  17   42.10    2.00
   2  -9  17   41.20    2.00
  -2   9 -17   38.10    2.00
   2   9  17   45.40    2.10
   2   9  17   42.40    2.20
  -2  -9 -15    4.10    1.00
   2  -9  15    2.70    0.60
   2  -9  15    2.80    0.60
  -2   9 -15    2.00    0.60
   2   9  15    2.20    0.80
   2  -9  13   41.40    1.90
  -2  -9 -13   42.90    2.20
   2  -9  13   42.20    1.80
   2   9  13   47.30    2.20
  -2   9 -13   45.40    1.80
   2   9  13   42.50    2.00
   2  -9  11   18.10    1.40
  -2  -9 -11   17.50    1.60
   2  -9  11   12.40    1.50
  -2   9 -11   15.70    1.00
   2   9  11   17.50    1.40
   2   9  11   15.40    1.20
  -2  -9  -9   20.30    1.50
   2  -9   9   21.20    1.50
   2  -9   9   20.10    1.00
  -2   9  -9   15.80    1.30
   2   9   9   20.90    1.30
  -2   9  -9   21.20    1.00
   2  -9   7  115.19    3.70
  -2  -9  -7  117.69    4.20
   2  -9   7  110.89    4.10
   2   9   7  119.69    4.10
  -2   9  -7  111.29    3.80
  -2   9  -7  121.89    3.80
  -2   9  -7  112.69    3.90
  -2  -9  -5   69.59    2.80
   2  -9   5   68.19    2.90
   2   9   5   68.49    2.60
  -2   9  -5   64.69    2.50
  -2   9  -5   68.89    2.30
  -2  -9  -3  141.99    4.80
  -2  -9  -3  135.99    4.50
   2   9   3  143.49    4.80
  -2   9  -3  140.89    4.70
  -2   9  -3  146.59    4.50
   2  -9   1   25.80    1.50
  -2  -9  -1   26.50    1.40
  -2  -9  -1   26.90    1.60
  -2  -9  -1   28.10    1.60
   2   9   1   29.90    1.40
  -2   9  -1   27.80    1.10
  -2   9  -1   25.80    1.30
   2  -9  -1   29.30    1.60
  -2  -9   1   28.90    1.60
  -2  -9   1   28.60    1.50
  -2   9   1   27.90    1.30
  -2   9   1   30.80    1.20
   2   9  -1   30.90    1.40
  -2  -9   3   94.29    3.30
   2  -9  -3   91.19    3.40
  -2  -9   3   93.29    3.50
  -2   9   3   90.29    3.10
   2   9  -3   95.89    3.30
  -2   9   3   96.49    3.10
  -2  -9   5   39.80    2.00
   2  -9  -5   38.40    1.90
  -2  -9   5   41.70    1.80
  -2   9   5   40.70    1.50
  -2   9   5   38.50    1.50
   2   9  -5   42.40    1.70
  -2  -9   7   26.80    1.70
   2  -9  -7   24.70    1.20
  -2   9   7   25.50    1.10
  -2   9   7   23.10    1.00
  -2   9   7   26.80    1.10
   2   9  -7   26.90    1.30
  -2  -9   9    1.40    0.70
   2  -9  -9    0.40    0.70
  -2  -9   9    1.90    0.70
  -2   9   9    0.30    0.40
  -2   9   9    0.90    0.40
  -2   9   9    0.40    0.30
   2   9  -9    1.30    0.50
  -2  -9  11   70.89    3.10
   2  -9 -11   73.99    2.80
  -2  -9  11   74.79    2.80
   2   9 -11   73.69    2.70
  -2   9  11   69.09    2.40
  -2   9  11   74.49    2.60
  -2  -9  13   65.99    3.00
   2  -9 -13   67.39    2.70
  -2  -9  13   67.89    2.70
   2   9 -13   64.19    2.50
  -2   9  13   65.09    2.40
  -2   9  13   63.99    2.40
   2  -9 -15    0.60    0.70
  -2  -9  15   -0.10    0.70
   2   9 -15    1.30    0.70
  -2   9  15    0.40    0.50
  -2   9  15    0.60    0.50
  -2  -9  17    8.10    1.20
  -2  -9  17    4.80    1.00
   2  -9 -17    6.60    1.40
  -2   9  17    5.20    1.00
  -2   9  17    5.70    1.00
   2   9 -17    4.80    1.20
  -2  -9  19    9.80    1.30
   2  -9 -19   10.30    1.60
  -2  -9  19    8.30    1.30
  -2   9  19    9.90    1.20
  -2   9  19    8.20    1.20
   2   9 -19    9.50    1.20
   2  -9 -21   22.50    1.90
  -2  -9  21   21.10    1.60
  -2   9  21   22.50    1.60
  -2   9  21   21.40    1.50
   2   9 -21   19.00    1.50
   2  -9 -23    0.40    1.20
  -2  -9  23    2.70    0.90
  -2  -9  23    1.40    0.80
  -2   9  23    2.50    0.80
  -2   9  23    1.10    0.90
   2   9 -23    0.90    0.80
  -2  -9  25    4.90    1.00
  -2  -9  25    4.50    1.00
   2  -9 -25    5.50    1.30
  -2   9  25    5.50    1.00
  -2   9  25    6.40    1.50
   2   9 -25    5.20    1.30
  -2 -10 -24   -0.30    1.50
   2 -10  24    1.40    1.00
   2  10  24    0.10    1.10
  -2  10 -24    1.60    0.90
  -2  10 -24    0.80    2.50
   2  10  24    0.40    1.20
  -2 -10 -22    5.30    1.30
   2 -10  22    8.80    1.50
   2  10  22    9.00    2.00
  -2  10 -22    7.10    1.30
  -2  10 -22    5.10    2.50
   2  10  22    9.50    1.70
   2 -10  20   45.30    2.20
  -2 -10 -20   43.80    2.70
   2 -10  20   44.30    2.20
   2  10  20   43.10    2.60
  -2  10 -20   44.80    2.00
   2  10  20   43.20    2.30
  -2  10 -20   51.99    3.90
   2 -10  18    7.00    1.40
   2 -10  18    6.60    1.20
  -2  10 -18    4.80    1.00
   2  10  18    1.80    0.90
   2  10  18    2.80    0.80
   2 -10  16   16.90    1.30
   2 -10  16   16.40    1.40
  -2 -10 -16   15.10    1.90
   2  10  16   14.80    1.40
   2  10  16   16.90    1.70
  -2  10 -16   16.70    1.20
   2 -10  14   55.59    2.20
   2 -10  14   57.99    2.40
  -2 -10 -14   56.39    2.80
   2  10  14   59.19    2.60
   2  10  14   62.29    2.70
  -2  10 -14   58.79    2.30
   2 -10  12   49.00    2.50
  -2 -10 -12   55.09    2.60
   2 -10  12   50.89    2.10
   2  10  12   50.69    2.40
   2  10  12   51.79    2.30
  -2  10 -12   56.19    2.10
  -2 -10 -10  102.89    3.90
   2 -10  10  100.09    3.80
   2 -10  10   97.09    3.30
   2  10  10  103.69    3.70
  -2  10 -10  102.99    3.50
   2 -10   8   25.40    1.10
  -2 -10  -8   23.30    1.80
   2 -10   8   26.80    1.70
  -2  10  -8   24.80    1.20
   2  10   8   27.00    1.50
   2 -10   6  166.78    5.70
  -2 -10  -6  169.78    5.80
  -2  10  -6  149.59    5.30
  -2  10  -6  170.68    5.20
   2  10   6  167.98    5.50
  -2 -10  -4   80.19    3.10
   2 -10   4   80.89    3.10
  -2  10  -4   73.99    2.80
  -2  10  -4   81.79    2.70
   2  10   4   79.79    2.90
   2 -10   2    1.60    0.70
  -2 -10  -2    1.60    0.50
  -2 -10  -2   -0.10    0.60
   2  10   2    0.40    0.50
  -2  10  -2    0.20    0.50
  -2 -10   0   51.39    2.20
  -2 -10   0   56.19    2.30
   2 -10   0   58.29    2.40
  -2 -10   0   59.59    2.50
  -2  10   0   60.09    2.00
   2  10   0   57.69    2.30
  -2  10   0   55.29    2.10
  -2 -10   2   57.79    2.60
   2 -10  -2   61.59    2.50
  -2 -10   2   60.49    2.40
   2  10  -2   58.69    2.30
  -2  10   2   57.49    2.00
  -2  10   2   56.19    2.10
  -2 -10   4    3.10    0.70
   2 -10  -4    4.60    1.20
  -2 -10   4    3.50    0.70
   2  10  -4    2.80    0.60
  -2  10   4    2.40    0.40
  -2  10   4    3.10    0.60
   2 -10  -6   41.90    1.90
  -2 -10   6   37.00    2.10
  -2 -10   6   41.70    1.90
  -2  10   6   39.10    1.50
   2  10  -6   41.30    1.80
  -2  10   6   41.40    1.60
   2 -10  -8    7.50    1.20
  -2 -10   8    8.60    1.40
   2 -10  -8    5.30    1.30
  -2 -10   8   10.80    1.20
  -2  10   8    8.20    0.70
   2  10  -8    9.60    1.00
  -2  10   8    8.60    0.90
  -2  10   8    8.40    0.70
   2 -10 -10    9.10    1.30
  -2 -10  10   10.20    1.10
  -2 -10  10    9.60    1.40
  -2  10  10    7.50    0.80
   2  10 -10    8.50    1.00
  -2  10  10    8.50    0.80
  -2 -10  12   89.19    3.80
   2 -10 -12   96.39    3.50
  -2 -10  12   97.59    3.40
  -2  10  12   92.69    3.30
   2  10 -12   92.99    3.40
  -2  10  12   97.09    3.30
   2 -10 -14  195.48    6.50
  -2 -10  14  191.58    7.20
  -2 -10  14  196.58    6.40
  -2  10  14  193.98    6.10
  -2  10  14  192.78    6.10
   2  10 -14  179.28    6.50
   2 -10 -16   64.49    2.80
  -2 -10  16   64.09    2.60
  -2 -10  16   62.49    2.70
  -2  10  16   59.79    2.40
  -2  10  16   62.49    2.40
   2  10 -16   62.49    2.50
  -2 -10  18   44.70    2.20
   2 -10 -18   42.90    2.40
  -2 -10  18   43.20    2.10
  -2  10  18   44.10    1.90
  -2  10  18   39.80    2.00
   2  10 -18   43.60    2.00
   2 -10 -20    2.50    1.10
  -2 -10  20    2.10    0.80
  -2 -10  20    2.40    0.70
  -2  10  20    2.10    0.70
   2  10 -20    1.90    0.80
  -2  10  20    1.20    0.80
  -2 -10  22    1.40    0.90
  -2 -10  22    0.90    0.90
   2 -10 -22    0.80    1.20
   2  10 -22    0.40    0.80
  -2  10  22    2.30    1.00
  -2  10  22    2.00    0.90
  -2 -10  24    1.10    1.00
   2 -10 -24   -1.20    1.30
  -2 -10  24   -0.90    0.90
  -2  10  24    2.70    1.10
   2  10 -24    2.80    0.90
  -2  10  24    1.70    1.00
  -2 -11 -21    1.30    1.30
   2 -11  21    0.50    1.00
   2  11  21    2.70    1.00
   2  11  21    2.20    1.20
  -2  11 -21    4.10    2.20
   2 -11  19    9.90    1.40
  -2 -11 -19   10.70    1.90
   2  11  19   11.70    1.50
  -2  11 -19   10.60    1.20
  -2 -11 -17    4.50    1.10
   2  11  17    3.10    0.80
   2  11  17    1.40    1.00
  -2  11 -17    2.70    0.70
   2 -11  15    5.90    1.20
  -2 -11 -15    3.20    1.20
  -2  11 -15    2.90    0.60
   2  11  15    2.20    0.90
   2  11  15    2.80    0.80
   2  11  13  120.09    4.40
  -2  11 -13  123.09    4.10
  -2 -11 -11   40.60    2.30
   2 -11  11   34.40    2.20
  -2  11 -11   38.70    1.70
   2 -11   9   31.60    1.90
  -2 -11  -9   28.40    2.10
  -2  11  -9   32.00    1.40
   2  11   9   30.30    1.70
  -2 -11  -7    1.80    0.80
   2 -11   7    3.70    0.80
   2  11   7    2.40    0.60
  -2  11  -7    1.80    0.50
   2 -11   5    2.50    0.70
  -2 -11  -5    1.70    0.90
  -2  11  -5    0.70    0.40
   2  11   5    0.80    0.60
  -2 -11  -3   10.70    1.50
   2 -11   3   11.40    1.30
  -2  11  -3   13.10    0.80
   2  11   3   13.30    1.10
   2 -11   1    1.90    0.70
  -2 -11  -1    3.10    0.90
  -2 -11  -1    2.50    0.80
  -2 -11  -1    2.70    0.90
   2  11   1    1.60    0.60
  -2 -11   1   19.20    1.60
  -2 -11   1   18.00    1.40
   2 -11  -1   18.70    1.40
  -2 -11   1   18.30    1.70
   2  11  -1   19.00    1.30
  -2  11   1   19.00    0.90
   2 -11  -3   14.70    1.30
  -2 -11   3   12.80    1.20
  -2 -11   3   15.10    1.60
  -2  11   3   13.50    0.80
   2  11  -3   12.40    1.10
  -2 -11   5   16.40    1.70
   2 -11  -5   15.60    1.40
  -2 -11   5   16.10    1.40
   2  11  -5   13.90    1.20
  -2  11   5   15.40    0.90
  -2 -11   7   28.50    1.90
   2 -11  -7   30.00    1.70
   2  11  -7   30.60    1.60
  -2  11   7   30.70    1.30
   2 -11  -9   -0.70    0.80
  -2 -11   9   -0.20    0.60
  -2 -11   9    0.30    0.90
  -2  11   9    0.10    0.40
   2  11  -9    0.60    0.60
  -2 -11  11   10.30    1.70
  -2 -11  11    8.70    1.10
   2 -11 -11   10.60    1.50
  -2  11  11   10.80    0.90
   2 -11 -13   33.50    2.00
  -2 -11  13   36.20    1.70
  -2  11  13   35.70    1.60
   2  11 -13   35.30    1.80
   2 -11 -15    0.20    1.00
  -2 -11  15    0.30    0.60
  -2  11  15    4.40    1.00
   2  11 -15    0.90    0.70
  -2 -11  17    0.30    0.80
  -2 -11  17   -0.60    0.70
   2 -11 -17   -1.00    1.00
   2  11 -17   -0.50    0.70
  -2  11  17    0.60    0.80
  -2 -11  19    4.80    0.80
   2 -11 -19    3.80    1.30
  -2 -11  19    5.70    1.40
  -2  11  19    6.00    1.30
   2  11 -19    7.80    1.20
   2 -11 -21    1.40    1.30
  -2 -11  21    4.40    1.00
  -2 -11  21    2.50    0.90
  -2  11  21    2.30    0.80
   2  11 -21    2.50    0.90
   2 -11 -23    1.80    1.40
  -2 -11  23    0.40    1.00
  -2 -11  23    2.60    1.00
  -2  11  23    3.10    1.00
   2 -12  20    1.50    1.00
  -2 -12 -20    0.10    1.40
   2  12  20    1.20    1.00
  -2  12 -20   -0.20    0.80
   2 -12  18    4.60    1.00
  -2 -12 -18    9.10    2.30
   2  12  18    4.60    1.10
  -2  12 -18    4.90    1.10
  -2 -12 -16    5.60    1.40
   2 -12  16    6.80    1.40
   2  12  16    9.30    1.50
  -2  12 -16    6.60    1.00
  -2 -12 -14    0.20    1.20
  -2  12 -14    1.70    0.60
   2  12  14    2.40    0.80
  -2 -12 -12    1.10    1.20
   2 -12  12    3.10    1.00
   2  12  12    1.60    0.80
  -2  12 -12    2.10    1.00
   2 -12  10    5.50    1.10
  -2  12 -10    4.10    0.90
   2  12  10    6.60    1.40
  -2 -12  -8    2.30    1.10
   2 -12   8    4.20    0.90
   2  12   8    3.60    0.80
  -2  12  -8    3.50    0.80
   2 -12   6   28.30    1.90
  -2 -12  -6   31.70    2.00
  -2  12  -6   28.40    1.30
   2 -12   4   54.19    2.50
  -2 -12  -4   54.69    2.70
   2  12   4   55.69    2.40
  -2  12  -4   56.59    2.10
  -2 -12  -2   22.50    1.70
  -2 -12  -2   23.90    1.90
   2 -12   2   21.10    1.70
  -2  12  -2   23.80    1.10
   2  12   2   21.70    1.40
   2 -12   0    4.40    0.90
  -2 -12   0    4.20    0.80
  -2 -12   0    4.40    1.00
   2  12   0    5.50    1.00
  -2  12   0    4.10    0.70
  -2 -12   2   26.80    1.60
   2 -12  -2   28.70    1.80
  -2 -12   2   31.20    2.10
  -2  12   2   29.40    1.30
   2  12  -2   28.70    1.60
  -2 -12   4    6.50    1.50
  -2 -12   4    8.40    1.10
   2 -12  -4    8.80    1.40
   2  12  -4    8.30    1.10
  -2  12   4    9.30    0.80
   2 -12  -6    1.50    0.90
  -2 -12   6    2.40    1.00
  -2  12   6    2.20    0.50
  -2 -12   8    8.40    1.60
  -2 -12   8    6.20    1.10
   2 -12  -8    8.70    1.50
  -2  12   8    6.60    0.80
   2  12  -8    9.00    1.10
   2 -12 -10    6.20    1.50
  -2 -12  10    2.40    0.70
  -2  12  10    4.20    0.80
   2  12 -10    3.70    0.80
   2 -12 -12   24.00    1.90
  -2 -12  12   26.20    2.20
  -2  12  12   24.70    1.30
   2  12 -12   25.70    1.50
  -2 -12  14    6.90    1.20
   2 -12 -14    7.30    1.70
   2  12 -14    5.90    1.10
  -2  12  14    6.20    1.00
   2 -12 -16    3.30    1.10
   2  12 -16    5.00    1.20
  -2 -12  18   17.50    1.70
  -2  12  18   21.20    1.50
   2  12 -18   15.60    1.50
   2 -12 -20    9.20    2.10
  -2 -12  20    5.80    1.00
   2  12 -20    5.80    1.40
  -2  12  20    8.20    1.50
  -2 -13 -19   18.00    2.80
   2 -13  19   21.80    1.90
   2  13  19   26.30    2.10
  -2  13 -19   24.80    1.60
  -2 -13 -17    2.20    1.40
   2 -13  17    2.90    0.90
   2  13  17    0.90    1.00
  -2  13 -17    1.90    0.70
  -2 -13 -15    9.50    2.30
   2  13  15    5.40    1.00
  -2  13 -15    5.80    1.00
  -2 -13 -13   28.30    2.30
  -2  13 -13   32.40    1.60
   2  13  13   34.40    2.00
  -2 -13 -11    3.10    1.30
   2 -13  11    4.70    1.10
   2  13  11    1.30    0.80
  -2  13 -11    2.10    0.60
   2 -13   9   86.99    3.70
  -2 -13  -9   93.09    3.90
   2  13   9   95.39    3.60
  -2  13  -9   96.39    3.40
   2 -13   7   31.90    2.20
   2  13   7   32.00    1.80
  -2  13  -7   34.00    1.50
   2 -13   5    2.80    1.00
   2  13   5    1.90    0.70
  -2  13  -5    0.70    0.50
  -2 -13  -3   -0.20    1.00
   2 -13   3    0.00    0.90
  -2  13  -3    1.30    0.50
   2  13   3    1.50    0.70
   2 -13   1    0.30    0.90
  -2 -13  -1    0.50    1.00
  -2  13  -1    0.60    0.40
   2  13   1    0.80    0.70
   2 -13  -1    4.60    0.90
   2  13  -1    7.40    1.10
  -2  13   1    8.30    0.80
  -2 -13   3   41.20    2.80
   2 -13  -3   40.90    2.20
  -2  13   3   44.00    1.70
   2  13  -3   43.30    2.00
   2 -13  -5   68.19    3.00
  -2  13   5   71.89    2.50
   2  13  -5   65.79    2.70
   2 -13  -7    2.60    0.90
  -2 -13   7    4.20    1.10
  -2  13   7    2.20    0.50
   2  13  -7    2.90    0.70
   2 -13  -9   10.40    1.80
  -2 -13   9   13.50    2.00
   2  13  -9   14.10    1.30
  -2  13   9   13.50    1.10
   2 -13 -11  102.19    3.90
  -2 -13  11   93.79    4.10
   2  13 -11   99.99    3.70
  -2  13  11  103.09    3.50
   2 -13 -13   79.29    3.50
  -2 -13  13   75.29    3.60
   2  13 -13   78.39    3.00
  -2  13  13   76.69    2.80
   2 -13 -15   14.90    2.10
  -2 -13  15   18.80    2.10
   2  13 -15   22.20    1.60
  -2  13  15   22.50    1.50
   2 -13 -17    2.70    1.60
   2  13 -17    3.60    0.90
  -2  13  17    4.20    0.80
  -2 -13  19    6.30    1.00
   2  13 -19    4.80    0.90
   2 -14  16   17.00    1.90
  -2 -14 -16   17.90    2.80
  -2  14 -16   15.50    1.30
   2  14  16   19.80    2.00
  -2 -14 -14    6.70    1.60
  -2  14 -14    4.60    1.10
   2  14  14    8.40    1.70
   2 -14  12   16.90    2.20
  -2 -14 -12   14.10    2.20
  -2  14 -12   16.00    1.20
   2  14  12   17.20    1.70
  -2 -14 -10    2.60    1.40
   2  14  10    6.30    1.40
  -2  14 -10    3.90    0.90
   2 -14   8   12.90    2.00
  -2 -14  -8   18.70    2.20
   2  14   8   15.50    1.40
  -2  14  -8   15.90    1.00
   2 -14   6    0.20    1.10
  -2 -14  -6    1.20    1.20
   2  14   6    1.40    0.80
   2 -14   4    0.70    1.00
  -2 -14  -4   -0.90    1.20
  -2  14  -4    3.80    0.80
   2  14   4    1.90    0.80
  -2 -14  -2    0.90    1.10
   2 -14   2    2.10    1.10
   2  14   2    2.50    0.80
  -2  14  -2    1.80    0.50
  -2 -14   0   19.60    2.20
   2 -14   0   22.00    1.90
   2  14   0   23.60    1.50
  -2  14   0   24.00    1.20
   2 -14  -2  168.48    6.00
  -2 -14   2  174.08    6.30
  -2  14   2  178.88    5.60
   2  14  -2  173.88    5.90
  -2 -14   4   14.40    2.10
   2 -14  -4   18.20    1.80
  -2  14   4   14.90    1.00
   2  14  -4   16.10    1.30
   2 -14  -6   29.20    2.20
  -2 -14   6   23.60    2.30
  -2  14   6   28.10    1.40
   2  14  -6   28.90    1.60
  -2 -14   8    1.90    1.10
   2 -14  -8    1.50    1.10
   2  14  -8    4.70    1.10
   2 -14 -10   -1.60    1.30
  -2 -14  10    0.30    1.20
   2  14 -10    0.30    0.70
  -2  14  10   -0.60    0.60
  -2 -14  12    4.00    1.30
   2 -14 -12   -0.10    1.30
   2  14 -12    1.20    0.80
  -2 -14  14    3.60    1.40
   2  14 -14    6.50    1.30
   2  14 -16    0.30    0.90
  -2 -15 -13    0.00    1.70
   2 -15  13    0.20    1.30
   2  15  13    0.60    1.00
  -2  15 -13    1.30    0.70
   2 -15  11    6.00    1.30
  -2 -15 -11    9.60    2.30
  -2  15 -11    5.70    1.10
   2  15  11    8.40    1.50
   2  15   9    7.80    1.60
  -2  15  -9    4.20    1.00
  -2 -15  -7    6.20    1.50
   2  15   7    4.70    1.00
  -2  15  -7    4.70    0.90
  -2 -15  -5    0.20    1.20
   2 -15   5    3.20    1.30
   2  15   5    5.80    1.40
  -2 -15  -3   11.80    2.00
   2 -15   3   15.30    2.00
   2  15   3   13.40    1.40
   2 -15   1    0.20    1.10
  -2 -15  -1   -0.10    1.30
   2  15   1    1.70    0.80
  -2 -15   1   43.10    2.70
   2 -15  -1   36.80    2.60
  -2  15   1   34.60    1.70
   2  15  -1   38.90    1.90
  -2 -15   3   -0.10    1.30
   2 -15  -3    3.20    1.30
  -2  15   3    1.40    0.60
   2  15  -3    2.40    0.80
   2 -15  -5    1.60    1.40
  -2 -15   5    1.80    1.20
  -2  15   5    0.60    0.70
   2  15  -5    0.60    0.80
  -2 -15   7    2.90    1.30
   2  15  -7    2.90    0.80
  -2 -15   9   11.50    2.30
   2  15  -9    9.30    1.30
  -2 -15  11    1.40    1.40
   2  15 -11    5.40    1.30
  -2 -15  13   15.30    2.60
   2  15 -13   16.70    1.60
  -2 -16  -8    4.20    1.70
   2  16   8    2.30    1.10
  -2  16  -8    1.50    0.70
  -2 -16  -6    3.20    1.60
  -2  16  -6    5.20    1.00
  -2 -16  -4    6.70    1.50
   2  16   4   13.90    1.50
  -2 -16  -2   12.40    2.50
   2  16   2    9.30    1.50
  -2 -16   0    8.00    1.50
   2  16   0   10.30    1.50
  -2 -16   2    2.40    1.30
   2  16  -2    7.40    1.40
  -2 -16   4   12.90    2.40
   2  16  -4   12.50    1.50
  -2 -16   6   20.50    2.60
   2  16  -6   17.80    1.60
  -2 -16   8   21.20    2.80
   2  16  -8   29.20    1.80
   3   0  29    0.20    1.10
  -3   0 -29   -1.00    1.00
   3   0  29    1.10    1.00
  -3   0 -27   -0.90    1.00
  -3   0 -27    3.10    2.60
   3   0  27    2.30    1.10
   3   0  27    0.40    0.80
  -3   0 -25    1.40    2.00
  -3   0 -25    2.00    0.80
   3   0  25    1.30    0.70
   3   0  25    0.20    0.80
   3   0  23   15.20    1.60
   3   0  23   17.70    1.30
  -3   0 -23   13.90    3.20
  -3   0 -23   15.10    1.40
   3   0  21    2.10    0.60
  -3   0 -21    3.20    1.70
   3   0  21    0.20    1.00
  -3   0 -19    6.10    1.40
   3   0  19    9.80    1.00
   3   0  19    8.10    1.30
  -3   0 -19    8.00    1.10
  -3   0 -17    1.30    1.20
   3   0  17    1.50    0.60
   3   0  17    1.10    0.50
  -3   0 -17    1.30    0.50
   3   0  15   12.50    0.90
  -3   0 -15   11.20    2.10
  -3   0 -15   13.20    1.00
   3   0  15   13.70    1.20
  -3   0 -13    1.00    0.90
   3   0  13    0.30    0.50
   3   0  13   -0.30    0.30
  -3   0 -13    1.50    0.50
  -3   0 -11    3.60    0.90
   3   0  11    4.20    0.90
   3   0  11    2.60    0.70
  -3   0 -11    2.80    1.30
   3   0   9    7.30    1.40
  -3   0  -9    6.60    0.80
   3   0   9    7.10    0.90
   3   0   7   21.80    1.30
   3   0   7   20.90    0.90
  -3   0  -7   20.40    1.00
  -3   0  -7   21.70    1.10
   3   0   7   20.70    1.00
   3   0   7   18.90    1.60
  -3   0  -7   21.00    1.10
  -3   0  -7   21.50    2.10
  -3   0  -5    0.40    0.30
  -3   0  -5    0.40    0.20
   3   0   5    0.40    0.30
  -3   0  -5   -0.20    0.70
   3   0   5    0.30    0.50
   3   0   5    0.70    0.30
   3   0   5    1.00    0.70
  -3   0  -5   -0.10    0.50
  -3   0  -3    2.60    0.50
  -3   0  -3    3.80    0.80
  -3   0  -3    2.60    0.40
  -3   0  -3    2.10    0.80
   3   0   3    2.60    0.80
   3   0   3    2.50    0.40
   3   0   3    2.80    0.50
  -3   0  -1   31.00    1.80
   3   0   1   31.10    1.10
   3   0   1   30.90    1.10
   3   0   1   30.20    1.70
  -3   0  -1   30.60    1.10
   3   0  -1   42.20    1.90
   3   0  -1   37.80    1.30
   3   0  -1   41.70    1.40
  -3   0   1   41.60    1.90
  -3   0   1   42.60    1.30
  -3   0   1   37.30    1.70
  -3   0   3   52.59    1.80
  -3   0   3   54.29    2.10
   3   0  -3   55.49    2.20
   3   0  -3   55.29    1.80
  -3   0   3   56.29    1.80
  -3   0   3   57.79    2.10
   3   0  -3   52.89    2.20
   3   0  -3   58.79    1.90
  -3   0   5   12.10    0.50
  -3   0   5   11.60    0.60
   3   0  -5   10.80    0.60
   3   0  -5   12.00    0.90
   3   0  -5   10.90    0.60
  -3   0   5   11.90    1.10
   3   0  -5   12.60    1.10
  -3   0   7    2.80    0.40
  -3   0   7    2.20    0.40
   3   0  -7    2.30    0.50
   3   0  -7    3.00    0.60
  -3   0   7    2.20    0.60
   3   0  -7    2.10    0.60
   3   0  -7    2.10    0.40
   3   0  -9    0.80    0.30
  -3   0   9    0.90    0.40
  -3   0   9    0.90    0.40
  -3   0   9    1.00    0.90
   3   0  -9    0.60    0.40
  -3   0  11    0.00    0.40
   3   0 -11   -0.10    0.50
  -3   0  11    1.40    0.90
  -3   0  13    0.80    0.30
  -3   0  13    1.40    0.70
   3   0 -13    1.50    0.40
  -3   0  13    1.20    0.40
  -3   0  15   13.00    0.80
   3   0 -15   13.20    0.90
  -3   0  15   11.40    1.20
   3   0 -15   11.70    1.10
   3   0 -17    5.10    1.10
   3   0 -17    4.40    0.80
  -3   0  17    5.40    0.60
  -3   0  17    5.50    1.00
   3   0 -19   -0.80    0.70
   3   0 -19   -0.10    0.50
  -3   0  19    0.00    0.60
  -3   0  19    0.30    0.40
   3   0 -21    1.90    0.90
  -3   0  21    4.60    0.80
  -3   0  21    3.30    0.70
   3   0 -21    3.50    0.70
   3   0 -23    7.60    1.20
  -3   0  23    9.60    1.30
   3   0 -25   13.60    1.30
  -3   0  25   12.30    1.20
  -3   0  25   11.60    1.50
   3   0 -27    2.60    0.90
  -3   0  27    2.60    0.90
   3   0 -29   -0.40    1.00
  -3   0  29    1.40    1.00
  -3   0  29    0.50    0.80
  -3  -1 -28    4.00    1.10
  -3  -1 -28    5.90    2.70
   3  -1  28    4.40    1.00
   3  -1  28    3.50    1.20
  -3   1 -28    6.40    2.60
  -3   1 -28    2.80    1.00
   3   1  28    4.30    1.00
   3   1  28    3.80    1.00
  -3  -1 -26    5.40    1.00
  -3  -1 -26    8.60    2.30
   3  -1  26    7.20    1.30
   3   1  26    7.20    1.80
  -3   1 -26    8.40    1.40
   3   1  26    7.00    1.50
   3  -1  24    5.00    0.80
  -3  -1 -24    4.60    1.90
  -3  -1 -24    4.40    0.90
  -3   1 -24    8.70    1.20
  -3   1 -24    3.40    2.10
   3   1  24    7.10    1.20
   3   1  24    5.60    1.60
  -3  -1 -22  101.69    5.00
   3  -1  22   94.59    4.10
  -3   1 -22  103.09    5.30
  -3   1 -22   97.99    3.60
   3   1  22   96.69    3.90
  -3  -1 -20   37.50    3.30
   3  -1  20   41.30    1.80
  -3  -1 -20   38.10    1.90
   3  -1  20   39.80    2.20
  -3   1 -20   38.60    1.90
  -3   1 -20   44.30    3.50
   3   1  20   41.30    1.90
   3   1  20   37.90    2.20
  -3  -1 -18   57.89    2.40
   3  -1  18   57.89    2.50
  -3  -1 -18   57.89    3.60
   3  -1  18   58.09    2.30
  -3   1 -18   56.99    2.30
  -3   1 -18   60.19    3.60
   3   1  18   58.29    2.40
   3   1  18   56.69    2.50
  -3  -1 -16   11.70    2.10
  -3  -1 -16   10.40    0.90
   3  -1  16    9.70    0.80
   3  -1  16    9.60    1.10
   3   1  16    9.60    0.90
  -3   1 -16    7.60    2.30
  -3   1 -16    9.40    0.90
   3   1  16   12.10    1.20
   3  -1  14   35.60    1.70
   3  -1  14   36.90    1.50
  -3  -1 -14   36.70    1.60
  -3  -1 -14   33.90    2.40
   3   1  14   35.60    1.60
  -3   1 -14   37.10    1.50
  -3   1 -14   37.00    2.60
   3   1  14   35.00    1.80
  -3  -1 -12    2.70    1.20
   3  -1  12    2.60    0.60
  -3  -1 -12    2.30    0.50
   3  -1  12    2.70    0.60
  -3   1 -12    3.20    0.70
  -3   1 -12    6.40    1.70
   3   1  12    2.40    0.60
   3   1  12    3.70    0.70
   3  -1  10    9.50    1.00
  -3  -1 -10    9.50    1.20
   3  -1  10   10.20    1.40
  -3  -1 -10    9.70    2.20
  -3  -1 -10    8.40    0.80
   3   1  10    7.90    1.30
  -3   1 -10   11.30    1.10
  -3   1 -10    9.50    0.90
  -3   1 -10    8.60    2.40
  -3  -1  -8  257.27    8.30
  -3  -1  -8  272.07    9.30
   3  -1   8  265.67    8.50
   3  -1   8  274.07    8.30
  -3  -1  -8  273.87    8.40
   3  -1   8  264.87    8.30
   3   1   8  264.97    8.30
  -3   1  -8  257.77    8.20
  -3   1  -8  265.07    9.20
  -3   1  -8  259.77    8.30
   3   1   8  262.47    9.40
  -3   1  -8  278.57    8.20
   3  -1   6   15.00    0.70
  -3  -1  -6   16.00    0.90
   3  -1   6   15.30    1.00
  -3  -1  -6   15.00    0.80
  -3  -1  -6   13.50    1.60
  -3  -1  -6   15.10    1.00
   3  -1   6   13.00    1.30
   3  -1   6   15.20    0.80
   3   1   6   14.00    1.50
  -3   1  -6   15.10    0.80
   3   1   6   15.70    1.10
  -3   1  -6   15.20    1.80
  -3   1  -6   15.30    0.70
  -3   1  -6   15.70    0.90
   3   1   6   14.60    0.80
   3   1   6   15.30    0.80
   3  -1   4   14.10    0.60
  -3  -1  -4   12.90    1.50
  -3  -1  -4   13.80    0.70
   3  -1   4   15.40    1.30
   3  -1   4   13.30    1.00
   3  -1   4   13.50    0.60
  -3  -1  -4   13.80    1.00
  -3  -1  -4   12.90    0.80
   3   1   4   14.10    0.70
   3   1   4   14.50    1.10
  -3   1  -4   14.50    1.40
   3   1   4   13.80    0.70
   3   1   4   14.30    1.40
  -3   1  -4   14.00    0.70
  -3   1  -4   14.40    0.90
  -3   1  -4   14.30    0.60
   3  -1   2   12.50    1.20
  -3  -1  -2   12.30    0.70
   3  -1   2   12.10    0.50
  -3  -1  -2   12.20    1.40
  -3  -1  -2   12.50    0.60
   3  -1   2   11.00    0.60
  -3  -1  -2   11.30    1.00
  -3   1  -2   11.80    0.90
   3   1   2   12.90    1.20
  -3   1  -2   13.00    0.50
  -3   1  -2   11.70    1.40
   3   1   2   12.20    0.70
   3   1   2   12.20    0.60
   3  -1   0   67.29    2.70
  -3  -1   0   68.29    2.20
  -3  -1   0   66.29    2.70
  -3  -1   0   66.49    2.20
   3   1   0   63.99    2.20
   3   1   0   65.79    2.70
  -3   1   0   67.39    2.70
   3   1   0   65.89    2.20
   3  -1  -2  187.68    5.80
  -3  -1   2  180.68    5.90
  -3  -1   2  181.28    5.60
  -3  -1   2  170.68    5.90
  -3  -1   2  178.98    5.60
   3  -1  -2  184.58    5.90
   3   1  -2  182.68    5.70
  -3   1   2  173.28    5.70
   3   1  -2  174.08    5.90
   3   1  -2  176.68    5.50
   3   1  -2  179.88    5.50
  -3   1   2  181.88    5.90
   3  -1  -4 1161.88   34.60
   3  -1  -4 1131.99   34.70
   3  -1  -4 1129.89   34.40
  -3  -1   4 1148.49   34.40
  -3  -1   4 1138.79   34.70
   3   1  -4 1218.88   35.30
   3   1  -4 1131.09   35.00
  -3   1   4 1158.18   35.20
  -3   1   4 1143.69   35.20
   3   1  -4 1167.08   35.10
   3   1  -4 1148.89   35.30
  -3  -1   6  968.00   29.20
   3  -1  -6  972.70   29.20
  -3  -1   6  956.60   29.40
   3  -1  -6  940.71   29.10
   3  -1  -6  952.10   29.40
  -3  -1   6  992.30   29.20
   3  -1  -6  976.70   29.10
   3   1  -6  972.60   29.20
   3   1  -6  975.10   29.30
  -3   1   6  941.71   29.20
   3   1  -6  971.80   29.50
  -3   1   6  986.70   29.40
  -3   1   6  959.20   29.20
   3  -1  -8   36.50    1.80
  -3  -1   8   37.80    1.40
   3  -1  -8   36.80    1.40
   3  -1  -8   38.50    1.30
  -3  -1   8   38.00    1.40
  -3  -1   8   39.20    1.90
   3   1  -8   38.90    1.40
  -3   1   8   38.20    1.30
   3   1  -8   36.60    1.70
  -3   1   8   37.40    1.80
  -3   1   8   39.00    1.40
   3  -1 -10  600.14   17.70
  -3  -1  10  590.44   18.00
  -3  -1  10  596.74   17.70
  -3  -1  10  544.45   17.90
   3   1 -10  601.34   18.20
  -3   1  10  609.04   18.20
  -3   1  10  584.24   18.10
  -3  -1  12   43.80    1.80
  -3  -1  12   49.80    2.30
  -3  -1  12   49.80    1.80
   3  -1 -12   50.09    1.80
  -3   1  12   51.59    1.90
  -3   1  12   45.90    1.80
  -3   1  12   50.89    2.20
   3   1 -12   48.10    1.90
  -3  -1  14  124.29    4.10
  -3  -1  14  124.69    4.40
  -3   1  14  116.69    4.00
   3   1 -14  127.19    4.10
  -3   1  14  129.79    4.10
  -3   1  14  126.49    4.30
   3  -1 -16   94.89    3.10
   3  -1 -16   94.39    3.10
  -3  -1  16   91.09    3.20
  -3  -1  16   91.09    3.40
  -3   1  16   92.19    3.40
  -3   1  16   90.99    3.20
   3   1 -16   94.09    3.40
   3   1 -16   95.69    3.20
  -3  -1  18   39.10    1.60
   3  -1 -18   37.00    1.70
  -3  -1  18   36.50    1.80
   3  -1 -18   39.90    1.60
   3   1 -18   39.80    1.70
  -3   1  18   38.60    1.60
  -3   1  18   39.40    1.90
   3   1 -18   39.20    2.00
   3  -1 -20    4.80    1.10
   3  -1 -20    4.00    1.00
  -3   1  20    5.90    0.90
   3   1 -20    8.00    1.00
   3   1 -20    4.80    1.00
  -3   1  20    7.50    1.20
  -3  -1  22   14.80    1.10
   3  -1 -22   15.40    1.30
   3   1 -22   16.50    1.20
   3   1 -22   12.20    1.80
  -3   1  22   10.80    1.60
  -3   1  22   15.50    1.10
   3  -1 -24    9.10    1.30
  -3  -1  24    6.30    1.10
  -3  -1  24   10.00    1.40
  -3   1  24    8.20    1.10
   3  -1 -26    0.40    0.80
  -3  -1  26    3.40    0.90
  -3  -1  26    0.60    0.70
  -3   1  26    1.90    0.80
  -3   1  26    0.80    0.70
   3   1 -26    2.10    0.90
  -3  -1  28   22.90    2.00
  -3  -1  28   21.50    1.60
   3  -1 -28   22.30    1.70
  -3   1  28   21.80    1.70
   3   1 -28   24.70    1.80
  -3   1  28   24.20    1.90
  -3  -1  30    1.50    0.90
   3  -1 -30    0.30    1.10
  -3  -1  30    1.00    0.90
  -3   1  30    1.00    1.00
   3   1 -30    0.20    1.10
  -3   1  30    0.20    0.90
   3  -2  29    1.40    1.00
   3  -2  29    3.70    1.30
  -3  -2 -29   -1.50    1.20
   3   2  29   -0.70    1.10
  -3   2 -29    0.40    2.80
   3  -2  27    4.30    0.90
   3  -2  27    5.50    1.10
  -3  -2 -27    3.40    1.00
   3   2  27    2.20    0.90
   3   2  27    4.20    1.10
  -3   2 -27    3.00    1.00
  -3   2 -27    3.90    2.90
  -3  -2 -25   14.80    3.20
   3  -2  25   13.00    1.50
   3  -2  25   12.90    1.80
  -3   2 -25   15.60    1.40
   3   2  25   17.00    1.90
   3   2  25   16.70    1.50
  -3  -2 -23   67.69    4.20
   3  -2  23   70.79    3.10
  -3  -2 -23   68.29    2.90
   3  -2  23   72.49    2.90
  -3   2 -23   79.59    4.90
   3   2  23   68.99    3.10
   3   2  23   69.99    2.90
  -3   2 -23   74.39    2.90
  -3  -2 -21    2.20    1.60
   3  -2  21    2.50    0.60
   3   2  21    2.50    0.70
  -3   2 -21    2.20    1.80
   3  -2  19    5.70    1.30
  -3  -2 -19    5.20    1.20
   3  -2  19    5.00    1.00
  -3   2 -19    6.70    1.00
   3   2  19    4.50    0.80
  -3   2 -19    4.90    1.50
   3  -2  17    1.60    0.60
  -3  -2 -17    0.50    1.30
  -3  -2 -17    0.50    0.60
   3   2  17    1.40    0.50
   3   2  17    1.40    0.60
  -3   2 -17    0.80    1.40
  -3   2 -17    1.80    0.50
  -3  -2 -15    6.10    0.90
   3  -2  15    8.40    0.70
  -3  -2 -15    7.70    1.90
   3  -2  15    6.90    1.00
  -3   2 -15    9.10    1.90
  -3   2 -15    8.20    0.80
   3   2  15    6.90    0.80
   3   2  15    9.20    1.10
   3  -2  13    8.00    0.70
   3  -2  13    6.60    1.00
  -3  -2 -13    7.30    0.90
  -3  -2 -13    8.20    1.60
  -3   2 -13    7.80    0.70
  -3   2 -13    8.70    1.70
   3   2  13    7.80    0.80
   3   2  13    6.80    1.00
  -3  -2 -11  248.58    7.80
  -3  -2 -11  244.08    8.70
   3  -2  11  242.58    7.80
   3   2  11  244.88    7.60
  -3   2 -11  225.08    7.50
   3   2  11  240.08    7.70
  -3   2 -11  238.88    8.50
  -3   2 -11  243.18    7.40
   3  -2   9  381.16   11.60
   3  -2   9  368.26   12.00
  -3  -2  -9  370.16   14.30
  -3  -2  -9  362.96   11.70
  -3  -2  -9  390.56   11.70
  -3   2  -9  360.06   11.60
   3   2   9  382.46   11.80
  -3   2  -9  387.86   12.60
  -3  -2  -7  746.23   23.20
   3  -2   7  771.22   23.30
   3  -2   7  743.73   23.10
  -3  -2  -7  776.42   24.00
  -3  -2  -7  792.32   23.30
   3  -2   7  757.42   23.20
  -3   2  -7  798.92   23.50
   3   2   7  786.82   23.60
  -3   2  -7  760.82   23.60
   3   2   7  745.13   24.40
   3   2   7  772.42   23.80
  -3   2  -7  791.32   24.40
  -3   2  -7  784.82   23.60
  -3  -2  -5   14.50    1.50
  -3  -2  -5   13.40    0.90
   3  -2   5   14.00    0.70
  -3  -2  -5   12.90    1.00
   3  -2   5   13.60    0.70
  -3  -2  -5   13.40    0.70
   3  -2   5   13.20    1.00
  -3   2  -5   13.40    1.60
   3   2   5   13.50    1.50
   3   2   5   13.30    0.80
   3   2   5   14.00    0.80
  -3   2  -5   13.10    0.90
   3   2   5   14.00    1.20
  -3   2  -5   13.90    0.70
   3  -2   3    4.40    0.40
  -3  -2  -3    4.20    1.20
  -3  -2  -3    3.70    0.50
  -3  -2  -3    3.10    0.80
  -3  -2  -3    3.80    0.70
   3  -2   3    3.90    0.40
   3   2   3    3.80    0.60
  -3   2  -3    4.00    0.60
  -3   2  -3    2.90    0.80
   3   2   3    4.40    0.50
  -3   2  -3    3.70    0.50
   3   2   3    2.80    0.80
  -3   2  -3    4.00    0.30
  -3  -2  -1  144.19    4.60
  -3  -2  -1  145.69    4.50
  -3  -2  -1  143.29    5.00
   3   2   1  142.59    4.60
   3   2   1  142.89    5.00
  -3   2  -1  144.09    5.00
   3   2   1  145.29    4.50
  -3  -2   1   11.90    0.70
  -3  -2   1   12.00    0.80
  -3  -2   1   11.10    1.10
  -3   2   1   12.20    1.10
  -3   2   1   12.00    0.90
   3   2  -1   13.50    1.20
   3   2  -1   11.60    0.80
   3   2  -1   10.90    0.70
  -3  -2   3  780.72   24.00
   3  -2  -3  772.92   23.90
  -3  -2   3  783.82   23.80
  -3  -2   3  804.32   23.80
  -3   2   3  777.42   23.70
   3   2  -3  796.72   23.60
  -3   2   3  799.72   23.70
   3   2  -3  762.12   23.50
   3   2  -3  750.32   23.70
  -3  -2   5  239.98    7.60
   3  -2  -5  227.88    7.20
  -3  -2   5  242.18    7.40
   3  -2  -5  231.88    7.50
   3  -2  -5  239.08    7.20
  -3  -2   5  242.28    7.30
  -3   2   5  238.58    7.50
   3   2  -5  245.28    7.40
  -3   2   5  242.38    7.60
   3   2  -5  231.48    7.70
   3   2  -5  246.98    7.60
   3  -2  -7  337.17   10.20
   3  -2  -7  336.57   10.20
  -3  -2   7  337.17   10.60
  -3  -2   7  332.97   10.30
   3  -2  -7  328.87   10.50
  -3  -2   7  340.77   10.30
  -3   2   7  336.77   10.00
   3   2  -7  324.07   10.20
   3   2  -7  316.47   10.30
   3   2  -7  327.87   10.10
  -3   2   7  332.87   10.20
  -3  -2   9  107.09    3.50
   3  -2  -9  105.89    3.80
   3  -2  -9  104.89    3.50
  -3  -2   9  105.19    3.70
   3  -2  -9  112.79    3.40
  -3   2   9  113.49    3.90
  -3   2   9  114.39    3.60
   3   2  -9  111.59    3.70
  -3   2   9  109.89    3.50
   3  -2 -11    5.10    0.80
  -3  -2  11    3.60    0.70
  -3  -2  11    3.70    1.00
  -3  -2  11    4.90    0.80
  -3   2  11    3.60    0.80
   3   2 -11    5.10    1.20
  -3   2  11    6.10    1.40
  -3   2  11    3.80    0.60
  -3  -2  13   54.89    2.30
   3  -2 -13   52.39    2.00
  -3  -2  13   52.79    2.00
  -3   2  13   55.09    2.20
   3   2 -13   54.19    2.00
  -3   2  13   49.30    1.90
  -3   2  13   54.39    2.00
  -3  -2  15   27.80    1.60
  -3  -2  15   27.40    1.30
   3  -2 -15   28.70    1.30
  -3   2  15   27.60    1.20
  -3   2  15   26.40    1.20
  -3   2  15   26.20    1.50
   3   2 -15   28.80    1.30
  -3  -2  17   19.80    1.40
   3  -2 -17   21.90    1.10
  -3  -2  17   23.90    1.10
  -3   2  17   22.30    1.40
  -3   2  17   20.40    1.10
   3   2 -17   20.90    1.10
   3  -2 -19    8.40    1.00
  -3  -2  19    7.00    1.20
  -3  -2  19    8.70    0.80
   3   2 -19    9.60    1.10
  -3   2  19    9.20    1.20
   3   2 -19   11.20    1.50
  -3   2  19    6.80    0.90
  -3  -2  21   28.50    1.50
   3  -2 -21   30.80    1.60
  -3  -2  21   30.00    1.80
   3   2 -21   31.10    1.60
   3   2 -21   26.40    2.70
  -3   2  21   29.70    1.40
  -3   2  21   28.40    1.70
  -3  -2  23    6.90    1.30
   3  -2 -23    7.90    1.20
  -3  -2  23    9.20    1.00
  -3   2  23    7.10    1.20
   3   2 -23    9.60    1.10
  -3   2  23    8.50    1.50
  -3  -2  25    0.30    0.80
  -3  -2  25    0.20    0.60
  -3   2  25    0.30    0.80
   3   2 -25   -1.20    0.80
  -3   2  25   -0.70    0.60
   3  -2 -27    9.60    1.40
  -3  -2  27   11.20    1.60
  -3  -2  27   10.00    1.40
   3   2 -27   13.40    1.50
  -3   2  27   11.30    1.40
  -3   2  27   13.10    1.60
  -3  -2  29   62.99    2.80
   3  -2 -29   60.79    2.70
  -3  -2  29   63.19    3.00
  -3   2  29   65.09    3.10
   3   2 -29   63.49    2.90
  -3   2  29   68.29    2.90
  -3  -3 -28    6.40    1.20
   3  -3  28    9.00    1.60
  -3   3 -28    7.80    2.90
  -3   3 -28    4.60    1.00
   3   3  28    7.10    1.90
  -3  -3 -26   20.90    1.80
   3  -3  26   24.30    2.10
  -3  -3 -26   25.40    3.60
   3  -3  26   26.40    1.80
   3   3  26   21.50    1.70
  -3   3 -26   27.50    4.60
  -3   3 -26   24.70    1.60
   3   3  26   23.20    2.10
   3  -3  24    3.70    0.90
   3  -3  24    5.00    1.30
  -3  -3 -24    4.50    1.80
  -3  -3 -24    1.60    1.00
   3   3  24    3.20    1.00
   3   3  24    3.20    0.80
  -3   3 -24    5.80    1.10
  -3  -3 -22   93.99    3.60
  -3  -3 -22   97.59    4.90
   3  -3  22   85.89    4.70
  -3   3 -22   96.49    5.00
   3   3  22   91.79    3.50
  -3   3 -22   94.99    3.50
   3   3  22   92.29    3.80
  -3  -3 -20    9.00    2.50
  -3  -3 -20    8.00    1.20
   3  -3  20    7.00    1.10
   3  -3  20    6.10    1.40
  -3   3 -20    8.40    1.10
  -3   3 -20    7.00    1.90
   3   3  20    9.40    1.40
   3   3  20    8.90    1.10
   3  -3  18  140.99    4.80
   3  -3  18  137.89    4.90
  -3  -3 -18  144.19    4.90
  -3  -3 -18  136.29    5.80
   3   3  18  134.19    4.90
  -3   3 -18  139.99    4.60
   3   3  18  138.59    4.80
  -3   3 -18  138.99    6.10
   3  -3  16    4.50    1.10
   3  -3  16    3.30    0.70
  -3  -3 -16    3.60    0.90
  -3  -3 -16    3.80    1.20
  -3   3 -16    3.20    1.30
  -3   3 -16    4.00    0.70
   3   3  16    4.80    0.80
   3   3  16    3.00    0.70
  -3  -3 -14   72.49    2.70
   3  -3  14   72.29    2.70
  -3  -3 -14   66.59    3.40
   3  -3  14   72.89    2.60
   3   3  14   70.09    2.60
   3   3  14   68.59    2.80
  -3   3 -14   71.59    2.50
  -3   3 -14   71.69    3.70
  -3  -3 -12   35.90    2.40
  -3  -3 -12   37.30    1.70
   3  -3  12   38.20    1.60
   3  -3  12   37.40    1.70
   3   3  12   35.40    1.50
   3   3  12   36.30    1.70
  -3   3 -12   34.10    1.40
  -3   3 -12   33.90    2.50
  -3  -3 -10  139.39    4.60
   3  -3  10  136.19    4.50
  -3  -3 -10  138.49    5.50
   3  -3  10  137.09    4.80
  -3   3 -10  136.89    4.30
   3   3  10  136.39    4.60
   3   3  10  136.79    4.50
  -3   3 -10  123.29    4.50
  -3   3 -10  136.69    5.30
   3  -3   8  456.35   14.50
   3  -3   8  478.75   14.40
  -3  -3  -8  475.75   14.50
  -3   3  -8  444.46   14.30
   3   3   8  472.25   14.50
  -3   3  -8  478.75   15.20
  -3   3  -8  476.75   14.20
  -3   3  -8  457.15   14.30
  -3  -3  -6  921.51   28.00
   3  -3   6  860.51   27.20
  -3  -3  -6  895.11   27.60
   3  -3   6  896.01   27.30
   3  -3   6  919.51   27.40
  -3  -3  -6  899.81   27.50
  -3  -3  -6  923.71   27.40
   3   3   6  921.31   27.80
   3   3   6  935.31   27.90
  -3   3  -6  899.91   27.70
  -3   3  -6  919.41   28.50
   3   3   6  884.21   28.80
  -3   3  -6  932.11   27.70
  -3   3  -6  901.41   27.60
   3  -3   4   15.40    1.00
   3  -3   4   15.10    0.70
  -3  -3  -4   16.90    1.60
  -3  -3  -4   15.30    1.10
  -3  -3  -4   15.80    1.10
  -3  -3  -4   16.30    0.90
   3   3   4   15.20    0.90
  -3   3  -4   17.30    1.50
  -3   3  -4   15.80    0.90
  -3   3  -4   15.00    0.80
   3   3   4   15.80    0.90
  -3   3  -4   16.40    0.70
   3   3   4   17.40    1.50
  -3  -3  -2  306.87    8.90
   3  -3   2  297.67    8.70
  -3  -3  -2  292.67    8.90
  -3  -3  -2  289.77    9.00
   3  -3   2  247.28    8.70
  -3   3  -2  305.97    9.80
  -3   3  -2  310.67    9.40
   3   3   2  297.37    9.40
   3   3   2  306.77    9.40
   3   3   2  306.17   10.00
  -3  -3   0  469.35   14.40
  -3  -3   0  467.65   14.30
   3   3   0  475.75   14.60
   3   3   0  481.45   15.10
  -3   3   0  474.25   14.90
  -3   3   0  495.15   14.60
   3   3   0  471.95   14.70
  -3  -3   2  307.27    9.70
   3  -3  -2  331.37    9.70
  -3  -3   2  307.97    9.90
  -3  -3   2  311.37    9.70
  -3   3   2  316.47    9.90
   3   3  -2  317.77    9.90
   3   3  -2  327.07    9.90
   3  -3  -4   30.20    1.00
   3  -3  -4   28.20    1.40
  -3  -3   4   28.90    1.20
  -3  -3   4   29.20    1.30
  -3  -3   4   27.80    1.50
  -3   3   4   30.40    1.30
   3   3  -4   27.60    1.60
   3   3  -4   28.60    1.20
   3   3  -4   29.00    1.40
  -3  -3   6  157.78    5.00
   3  -3  -6  151.98    4.80
  -3  -3   6  155.88    5.20
   3  -3  -6  153.38    5.10
  -3  -3   6  151.88    4.90
   3  -3  -6  155.88    4.70
  -3   3   6  154.58    4.80
   3   3  -6  147.19    4.90
   3   3  -6  148.09    4.70
   3   3  -6  144.79    5.00
   3  -3  -8   44.80    2.10
   3  -3  -8   46.80    1.60
   3  -3  -8   44.30    1.60
  -3  -3   8   45.80    1.80
  -3  -3   8   44.60    2.60
  -3   3   8   47.70    1.60
  -3   3   8   49.99    2.10
   3   3  -8   45.40    1.90
  -3   3   8   46.20    1.60
   3  -3 -10   36.90    1.40
  -3  -3  10   35.30    1.50
  -3  -3  10   35.60    2.00
  -3  -3  10   36.60    1.60
  -3   3  10   35.60    2.10
  -3   3  10   37.30    1.40
  -3   3  10   35.70    1.30
   3  -3 -12  379.26   11.60
  -3  -3  12  372.86   11.70
  -3  -3  12  381.56   11.90
  -3   3  12  366.56   11.70
   3   3 -12  387.06   11.80
  -3   3  12  387.46   12.00
  -3   3  12  392.26   11.80
  -3  -3  14   64.19    2.40
  -3  -3  14   66.49    2.70
  -3   3  14   65.79    2.50
  -3   3  14   66.89    2.30
   3   3 -14   64.79    2.30
  -3   3  14   59.59    2.20
  -3  -3  16    8.70    0.70
   3  -3 -16    6.80    0.80
  -3  -3  16    7.60    1.10
  -3   3  16    7.90    0.70
   3   3 -16    8.50    0.80
  -3   3  16    7.60    0.60
  -3   3  16    7.00    1.00
  -3  -3  18    3.70    0.70
   3  -3 -18    3.80    0.80
  -3  -3  18    3.50    0.80
  -3   3  18    2.80    0.70
  -3   3  18    3.20    0.70
   3   3 -18    4.10    0.80
   3  -3 -20   27.60    1.50
  -3  -3  20   27.00    1.80
  -3  -3  20   28.20    1.40
  -3   3  20   30.20    1.80
   3   3 -20   30.50    1.60
   3   3 -20   34.80    2.20
  -3   3  20   27.50    1.40
   3  -3 -22   21.90    1.40
  -3   3  22   19.10    1.80
  -3   3  22   23.30    1.30
   3   3 -22   20.00    2.20
   3   3 -22   23.80    1.40
  -3  -3  24  104.99    3.80
  -3  -3  24  101.59    4.00
   3  -3 -24  102.09    3.70
  -3   3  24  103.19    4.00
   3   3 -24  102.29    3.80
  -3   3  24  108.79    3.80
   3  -3 -26   -0.60    0.80
  -3  -3  26    0.20    0.70
  -3  -3  26    1.20    0.80
   3   3 -26    1.70    0.80
  -3   3  26   -0.30    0.70
  -3   3  26    0.10    0.80
  -3  -3  28    6.50    1.70
  -3  -3  28    7.40    1.30
  -3   3  28    5.10    0.90
  -3   3  28    6.90    1.60
   3   3 -28    3.50    1.00
   3  -3 -30   -0.10    1.20
  -3  -3  30   -1.70    1.00
  -3  -3  30    0.80    1.00
  -3   3  30    1.80    1.10
  -3   3  30    0.90    1.00
   3  -4  27    5.60    1.20
   3  -4  27    7.90    1.50
  -3   4 -27    6.80    2.90
   3   4  27    6.10    1.50
  -3   4 -27    5.10    1.00
   3   4  27    4.50    1.20
   3  -4  25   24.70    1.60
  -3  -4 -25   25.70    2.00
   3  -4  25   25.10    2.00
  -3  -4 -25   22.70    3.50
   3   4  25   24.30    1.70
  -3   4 -25   20.10    3.90
  -3   4 -25   24.20    1.60
   3   4  25   23.30    2.10
   3  -4  23   33.10    2.10
   3  -4  23   28.30    1.80
  -3  -4 -23   29.90    2.00
  -3  -4 -23   31.20    3.30
   3   4  23   27.90    2.10
  -3   4 -23   31.70    1.70
   3   4  23   33.00    1.90
  -3  -4 -21    3.00    1.50
   3  -4  21    0.50    0.80
  -3  -4 -21    1.80    0.90
   3  -4  21    2.30    0.60
  -3   4 -21    0.80    0.70
  -3   4 -21   -0.20    1.90
   3   4  21    0.70    0.80
   3   4  21    1.40    0.70
  -3  -4 -19  163.68    6.60
  -3  -4 -19  167.38    5.60
   3  -4  19  158.18    5.50
   3  -4  19  163.18    5.70
   3   4  19  160.48    5.70
   3   4  19  162.28    5.50
  -3   4 -19  162.98    5.40
  -3   4 -19  160.78    6.80
  -3  -4 -17    1.40    1.20
  -3  -4 -17    0.20    0.70
   3  -4  17    0.80    0.70
   3  -4  17    1.20    0.50
   3   4  17    1.70    0.60
  -3   4 -17    0.40    1.40
  -3   4 -17    1.00    0.50
   3   4  17    1.20    0.70
   3  -4  15   37.10    1.80
   3  -4  15   37.20    1.60
  -3  -4 -15   36.60    2.40
  -3  -4 -15   39.00    1.80
   3   4  15   37.10    1.70
  -3   4 -15   38.50    2.70
   3   4  15   36.60    1.90
  -3   4 -15   37.40    1.60
   3  -4  13    1.10    0.40
  -3  -4 -13    1.50    0.60
   3  -4  13    1.20    0.50
  -3  -4 -13    0.30    0.80
   3   4  13    1.50    0.50
  -3   4 -13    0.90    0.90
   3   4  13    1.80    0.40
  -3   4 -13    1.10    0.40
  -3  -4 -11   19.70    1.30
  -3  -4 -11   20.40    1.70
   3  -4  11   20.80    1.40
  -3   4 -11   20.30    1.00
   3   4  11   22.10    1.20
   3   4  11   19.60    1.30
  -3   4 -11   16.50    1.30
  -3   4 -11   22.00    1.90
   3  -4   9    4.10    0.70
   3  -4   9    3.00    0.70
  -3  -4  -9    4.60    1.10
  -3   4  -9    4.60    0.70
   3   4   9    4.20    0.80
  -3   4  -9    4.90    1.00
   3   4   9    5.90    1.10
  -3   4  -9    4.50    0.80
   3  -4   7   27.30    1.30
  -3  -4  -7   26.70    1.60
   3  -4   7   28.00    1.40
  -3  -4  -7   27.80    2.30
   3   4   7   26.40    1.60
  -3   4  -7   28.80    1.20
  -3   4  -7   26.20    1.40
  -3   4  -7   26.90    1.30
  -3   4  -7   26.90    2.20
   3   4   7   25.90    2.00
  -3  -4  -5  507.55   15.60
  -3  -4  -5  501.85   15.60
   3  -4   5  482.55   15.40
   3  -4   5  537.25   15.50
   3   4   5  547.75   16.30
  -3   4  -5  531.25   16.10
  -3   4  -5  516.85   16.10
  -3   4  -5  522.05   16.00
  -3  -4  -3  867.61   25.90
   3  -4   3  850.11   25.70
  -3  -4  -3  848.02   25.90
  -3  -4  -3  864.91   25.80
   3  -4   3  817.42   25.60
   3   4   3  845.32   26.10
   3   4   3  871.41   26.90
  -3   4  -3  896.81   25.80
  -3   4  -3  852.91   25.70
   3   4   3  849.81   26.00
  -3   4  -3  804.02   25.80
  -3  -4  -1   10.70    0.80
   3  -4   1   11.50    0.50
  -3  -4  -1   10.80    1.10
   3  -4   1   10.30    0.60
   3   4   1   11.20    0.80
   3   4   1   13.00    1.20
   3   4   1    9.60    0.90
  -3   4  -1   11.20    0.70
  -3  -4   1   87.39    3.30
   3  -4  -1   95.19    2.90
  -3  -4   1   94.89    3.10
  -3  -4   1   97.79    3.30
   3   4  -1   93.49    3.20
  -3   4   1   96.79    3.10
   3   4  -1   93.69    3.20
   3  -4  -3  743.83   22.60
  -3  -4   3  751.52   22.80
  -3  -4   3  748.53   23.00
   3  -4  -3  753.92   22.80
  -3  -4   3  753.02   22.90
  -3   4   3  764.22   23.20
   3   4  -3  754.62   23.20
   3   4  -3  748.03   23.30
   3   4  -3  790.12   23.40
   3  -4  -5   28.20    1.00
  -3  -4   5   27.00    1.80
   3  -4  -5   26.60    1.40
   3  -4  -5   26.10    1.00
  -3  -4   5   24.70    1.20
  -3  -4   5   25.40    1.80
   3   4  -5   26.20    1.30
  -3   4   5   27.00    1.30
   3   4  -5   24.50    1.70
   3  -4  -7  472.05   14.60
  -3  -4   7  465.05   14.50
  -3  -4   7  480.45   14.70
   3  -4  -7  464.05   14.40
  -3  -4   7  480.05   14.80
   3  -4  -7  484.25   14.40
   3   4  -7  467.25   14.60
  -3   4   7  448.36   14.20
  -3   4   7  481.55   14.30
  -3   4   7  487.75   14.50
   3  -4  -9   11.30    0.80
  -3  -4   9   11.60    1.60
   3  -4  -9   11.80    1.10
  -3   4   9    9.90    0.70
  -3   4   9   11.80    1.20
  -3   4   9   10.30    0.60
   3   4  -9   10.40    1.20
  -3  -4  11   37.00    1.60
  -3  -4  11   39.20    2.00
   3  -4 -11   37.50    1.50
  -3   4  11   39.60    1.60
  -3   4  11   35.60    1.30
   3   4 -11   37.50    1.60
  -3   4  11   38.50    1.80
  -3   4  11   38.60    1.50
  -3  -4  13   86.19    3.20
   3  -4 -13   82.49    2.90
  -3  -4  13   84.69    3.00
   3   4 -13   83.29    2.90
  -3   4  13   85.59    2.80
  -3   4  13   79.99    2.70
  -3   4  13   86.09    3.00
   3  -4 -15    8.50    1.10
  -3  -4  15    8.30    1.20
  -3  -4  15    7.30    0.70
  -3   4  15    7.70    0.70
  -3   4  15    7.90    0.90
  -3   4  15    6.90    0.60
   3   4 -15    7.20    0.80
  -3  -4  17   12.40    0.90
   3  -4 -17   10.50    0.90
  -3  -4  17   12.30    1.30
   3   4 -17   12.40    1.00
  -3   4  17   13.20    1.10
  -3   4  17   11.60    0.90
   3  -4 -19    3.80    0.70
  -3  -4  19    2.00    0.80
  -3  -4  19    3.20    0.80
  -3   4  19    5.00    1.10
   3   4 -19    2.70    0.60
  -3   4  19    3.30    0.60
  -3  -4  21   48.70    2.40
   3  -4 -21   47.00    2.10
  -3   4  21   45.30    2.20
   3   4 -21   46.70    2.10
  -3   4  21   47.30    2.00
  -3  -4  23    0.30    0.60
   3  -4 -23    1.80    0.70
  -3  -4  23    0.40    0.80
   3   4 -23    0.70    1.30
  -3   4  23    0.00    0.70
   3   4 -23    1.30    0.80
  -3  -4  25    7.90    1.50
  -3  -4  25    4.90    1.10
  -3   4  25    5.40    1.20
   3   4 -25    7.30    1.30
   3  -4 -27    6.50    1.00
  -3  -4  27    9.30    1.40
  -3  -4  27    8.00    1.70
   3   4 -27    8.80    1.40
  -3   4  27   10.20    1.60
  -3   4  27   12.30    1.40
   3  -4 -29    0.90    1.10
  -3  -4  29    3.20    0.90
   3   4 -29    3.90    1.10
  -3   4  29    4.20    1.00
  -3   4  29    7.20    1.80
   3  -5  28    1.20    1.10
  -3  -5 -28   -0.20    1.30
   3  -5  28    1.30    1.20
   3   5  28    0.50    1.30
   3   5  28   -0.20    1.00
  -3   5 -28   -0.70    1.00
  -3   5 -28    3.90    3.20
  -3  -5 -26    0.60    2.40
  -3  -5 -26    3.20    1.30
   3  -5  26    4.70    1.10
   3  -5  26    4.20    0.90
  -3   5 -26    7.60    2.80
  -3   5 -26    3.60    1.00
   3   5  26    8.20    1.90
   3   5  26    4.10    0.90
  -3  -5 -24    0.10    1.70
  -3  -5 -24   -1.10    1.10
   3  -5  24    0.50    0.80
   3  -5  24    1.20    0.90
   3   5  24   -0.30    0.90
   3   5  24   -0.30    0.80
  -3   5 -24   -0.10    0.70
  -3   5 -24   -0.90    2.10
   3  -5  22    3.00    1.30
  -3  -5 -22    3.00    1.70
   3  -5  22    2.50    0.80
  -3   5 -22    1.30    0.70
   3   5  22    2.50    0.80
   3   5  22    3.80    0.90
  -3  -5 -20   22.90    2.70
   3  -5  20   27.40    1.80
   3  -5  20   24.30    1.50
  -3  -5 -20   22.60    1.90
   3   5  20   27.10    1.60
  -3   5 -20   25.40    3.30
  -3  -5 -18   21.40    2.40
  -3  -5 -18   17.20    1.50
   3  -5  18   19.50    1.30
   3  -5  18   17.80    1.50
   3   5  18   16.20    1.30
  -3   5 -18   17.00    1.20
  -3   5 -18   17.50    2.80
   3   5  18   18.60    1.70
   3  -5  16    5.60    1.10
  -3  -5 -16    8.30    1.90
   3  -5  16    6.10    0.90
  -3   5 -16    7.20    2.10
   3   5  16    8.30    0.90
   3   5  16    6.90    1.20
  -3   5 -16    8.10    0.90
  -3  -5 -14   13.20    1.90
   3  -5  14   15.00    1.00
   3  -5  14   14.50    1.10
  -3  -5 -14   13.90    1.20
  -3   5 -14   15.70    1.00
   3   5  14   15.60    1.20
  -3   5 -14   15.80    2.00
   3   5  14   16.30    1.10
  -3  -5 -12    1.40    0.60
   3  -5  12    0.30    0.50
   3  -5  12   -0.30    0.40
   3   5  12    1.30    0.50
   3   5  12   -0.30    0.60
  -3   5 -12    0.40    0.40
  -3   5 -12   -0.10    0.80
  -3   5 -12    0.80    0.80
  -3  -5 -10   15.30    1.10
   3  -5  10   14.20    1.20
  -3   5 -10   15.30    1.30
  -3   5 -10   16.70    0.90
   3   5  10   17.80    1.20
   3   5  10   16.30    1.10
  -3   5 -10   16.80    1.60
   3  -5   8   50.09    2.00
   3  -5   8   51.49    1.90
  -3  -5  -8   48.20    2.10
  -3   5  -8   52.39    2.10
  -3   5  -8   51.89    1.80
  -3   5  -8   49.60    1.90
   3   5   8   51.09    2.00
   3   5   8   50.99    2.30
  -3  -5  -6  521.35   16.20
   3  -5   6  523.55   16.00
   3  -5   6  524.25   16.10
  -3   5  -6  525.15   15.90
  -3   5  -6  502.55   15.80
  -3   5  -6  517.35   15.70
   3   5   6  529.95   16.00
   3  -5   4    4.70    0.60
   3  -5   4    4.60    0.90
  -3  -5  -4    5.20    1.00
  -3  -5  -4    3.60    1.00
   3  -5   4    5.40    0.90
  -3   5  -4    6.60    0.60
  -3   5  -4    5.00    0.70
  -3   5  -4    5.30    0.80
   3   5   4    5.70    1.20
  -3  -5  -2    4.60    1.20
  -3  -5  -2    3.60    0.80
   3  -5   2    2.40    0.50
   3  -5   2    3.40    0.80
  -3   5  -2    2.80    0.60
  -3   5  -2    3.00    0.50
   3  -5   0    7.10    0.60
   3  -5   0    6.50    0.70
  -3  -5   0    8.50    1.30
  -3  -5   0    6.50    0.70
  -3   5   0    5.90    0.80
   3   5   0    6.20    1.30
  -3   5   0    6.70    0.70
  -3  -5   2   84.29    3.00
   3  -5  -2   88.99    2.80
  -3  -5   2   88.59    3.30
   3  -5  -2   87.49    2.80
  -3  -5   2   85.99    3.50
   3   5  -2   86.19    3.30
  -3   5   2   90.79    2.90
   3  -5  -4    8.40    1.00
   3  -5  -4    8.70    0.70
   3  -5  -4    8.00    0.70
  -3  -5   4    8.70    1.40
  -3  -5   4    6.90    1.40
   3   5  -4   10.90    1.50
  -3   5   4    9.00    0.90
   3  -5  -6  165.48    4.90
   3  -5  -6  153.88    4.90
  -3  -5   6  152.88    5.30
   3  -5  -6  154.08    5.10
  -3  -5   6  156.38    5.40
   3   5  -6  161.98    5.10
   3   5  -6  147.19    5.60
  -3   5   6  161.38    5.00
  -3  -5   8  525.65   16.00
  -3  -5   8  509.05   16.10
   3  -5  -8  503.05   15.90
   3  -5  -8  530.55   15.70
  -3   5   8  470.45   15.40
  -3   5   8  516.95   15.40
   3   5  -8  521.35   15.60
  -3   5   8  522.45   15.60
  -3  -5  10   29.20    1.70
   3  -5 -10   27.80    1.20
  -3  -5  10   28.10    1.70
  -3   5  10   27.50    1.50
  -3   5  10   27.60    1.20
   3   5 -10   28.60    1.30
  -3   5  10   26.90    1.00
  -3  -5  12    6.10    1.20
  -3  -5  12    6.10    0.70
   3  -5 -12    6.70    0.70
  -3   5  12    6.00    0.90
  -3   5  12    6.10    0.50
  -3   5  12    5.90    0.90
   3   5 -12    7.00    0.80
  -3   5  12    6.20    0.60
  -3  -5  14   14.30    0.90
  -3  -5  14   13.90    1.30
  -3   5  14   13.00    0.70
  -3   5  14   14.00    1.00
  -3   5  14   12.40    1.00
   3   5 -14   12.60    1.00
  -3   5  14   14.40    0.80
   3  -5 -16    0.80    0.40
  -3  -5  16    0.60    0.40
  -3  -5  16    0.90    0.70
  -3   5  16    0.30    0.50
  -3   5  16    0.60    0.40
   3   5 -16    0.60    0.50
  -3  -5  18    4.90    0.80
  -3  -5  18    6.30    1.30
   3  -5 -18    6.00    1.00
  -3   5  18    3.50    0.80
   3   5 -18    5.00    1.00
  -3   5  18    5.90    1.00
   3  -5 -20   10.40    1.10
  -3  -5  20    8.90    1.40
  -3  -5  20    7.60    1.10
  -3   5  20    8.00    0.90
   3   5 -20    9.10    1.10
  -3   5  20    5.30    1.20
  -3  -5  22    3.10    1.00
   3  -5 -22    3.10    0.80
  -3  -5  22    3.60    0.70
  -3   5  22    3.20    0.80
  -3   5  22    3.40    0.60
   3   5 -22    3.90    0.80
  -3  -5  24    5.00    0.80
  -3  -5  24    5.60    1.40
   3  -5 -24    5.30    1.30
  -3   5  24    6.90    1.30
   3   5 -24    7.40    1.30
   3   5 -24    5.50    1.50
  -3   5  24    5.10    1.20
  -3  -5  26    4.50    1.00
   3  -5 -26    4.60    1.00
  -3  -5  26    5.30    1.30
   3   5 -26    2.90    0.90
  -3   5  26    6.20    1.40
  -3   5  26    4.10    0.90
  -3  -5  28    6.50    1.80
  -3  -5  28    4.30    0.90
   3  -5 -28    2.90    1.10
  -3   5  28    4.80    1.10
  -3   5  28    4.60    0.90
   3   5 -28    4.90    1.00
   3  -6  27    0.60    1.00
  -3  -6 -27    0.40    1.40
   3  -6  27    4.00    1.20
  -3   6 -27    0.50    0.90
   3   6  27   -0.60    1.20
   3   6  27    1.80    1.00
  -3   6 -27    2.00    3.20
   3  -6  25    3.80    1.10
  -3  -6 -25    5.60    1.30
  -3   6 -25    3.10    0.80
   3   6  25    4.30    0.90
  -3   6 -25    3.00    2.70
   3   6  25    2.10    1.10
   3  -6  23    1.10    0.70
   3  -6  23    1.00    0.90
  -3  -6 -23    2.80    1.10
   3   6  23    0.00    0.80
  -3   6 -23   -0.20    0.70
  -3   6 -23   -0.20    2.30
   3   6  23    1.60    0.90
   3  -6  21    3.60    0.80
  -3  -6 -21    3.50    0.90
   3   6  21    3.80    0.80
  -3   6 -21    5.00    2.10
   3   6  21    4.10    0.90
  -3   6 -21    4.30    0.70
   3  -6  19    5.90    1.10
  -3   6 -19    7.50    1.90
   3   6  19    8.40    1.20
  -3   6 -19    8.50    1.20
   3   6  19   10.30    1.40
  -3  -6 -17   20.70    1.60
   3  -6  17   21.90    1.50
   3  -6  17   21.20    1.30
   3   6  17   18.30    1.60
  -3   6 -17   25.30    2.60
  -3   6 -17   24.70    1.40
   3   6  17   22.40    1.40
   3  -6  15   16.40    1.30
  -3  -6 -15   17.30    1.40
   3  -6  15   18.60    1.10
   3   6  15   14.40    1.50
   3   6  15   17.70    1.20
  -3   6 -15   17.20    1.10
  -3   6 -15   15.40    2.10
   3  -6  13    5.40    0.80
   3  -6  13    4.40    0.80
  -3  -6 -13    7.10    1.10
   3   6  13    6.90    0.90
   3   6  13    5.40    1.10
  -3   6 -13    9.00    1.70
  -3   6 -13    7.10    0.70
  -3  -6 -11    0.90    0.60
   3  -6  11    1.10    0.50
   3  -6  11    1.20    0.40
   3   6  11    0.10    0.40
   3   6  11    1.00    0.60
  -3   6 -11    0.00    0.40
  -3   6 -11    0.00    0.70
  -3  -6  -9    3.80    1.00
   3  -6   9    3.40    0.80
  -3   6  -9    4.80    0.60
  -3   6  -9    4.10    0.70
  -3   6  -9    3.60    0.80
   3   6   9    5.70    0.70
   3   6   9    4.30    1.00
   3  -6   7   19.00    1.20
  -3  -6  -7   17.30    1.30
   3  -6   7   17.20    1.00
   3   6   7   17.30    1.10
  -3   6  -7   17.10    1.00
  -3   6  -7   17.50    1.10
  -3   6  -7   17.10    0.90
   3  -6   5  281.37    8.90
   3  -6   5  289.27    8.80
  -3  -6  -5  284.97    9.10
  -3   6  -5  285.37    8.80
  -3   6  -5  288.77    8.80
  -3   6  -5  282.97    8.90
   3   6   5  290.17    9.10
  -3  -6  -3  140.39    4.80
   3  -6   3  151.58    4.80
   3  -6   3  146.09    4.70
  -3  -6  -3  148.19    5.00
  -3   6  -3  153.48    4.70
  -3   6  -3  152.08    4.80
  -3   6  -3  152.08    4.70
   3   6   3  151.58    5.00
   3  -6   1  150.88    4.80
   3  -6   1  149.29    4.70
  -3  -6  -1  151.88    5.10
  -3   6  -1  155.28    4.80
   3   6   1  154.98    5.10
  -3   6  -1  157.18    4.80
   3  -6  -1   14.90    0.80
  -3  -6   1   16.80    1.80
   3  -6  -1   16.20    1.00
  -3  -6   1   15.60    1.50
   3   6  -1   15.30    1.20
   3  -6  -3   22.30    1.00
   3  -6  -3   24.00    1.10
  -3  -6   3   24.40    1.60
  -3  -6   3   26.00    1.90
   3   6  -3   22.90    1.40
  -3   6   3   24.50    1.10
  -3  -6   5  143.99    5.00
   3  -6  -5  140.39    4.60
   3  -6  -5  135.29    4.50
   3  -6  -5  141.59    4.50
  -3  -6   5  143.99    4.90
   3   6  -5  128.09    4.90
   3   6  -5  141.49    4.60
  -3   6   5  144.49    4.40
  -3  -6   7  725.73   23.60
   3  -6  -7  781.72   23.10
  -3  -6   7  775.62   23.40
   3  -6  -7  758.72   23.20
   3   6  -7  782.32   23.60
  -3   6   7  764.32   23.50
  -3   6   7  773.82   23.40
   3  -6  -9  131.59    4.70
  -3  -6   9  144.59    4.90
   3  -6  -9  143.59    4.50
  -3  -6   9  138.19    4.80
  -3   6   9  143.59    4.60
  -3   6   9  142.89    4.40
  -3   6   9  141.49    4.50
   3   6  -9  145.59    4.70
  -3  -6  11   13.60    1.30
   3  -6 -11   14.20    0.90
  -3  -6  11   13.10    1.30
  -3   6  11   13.90    0.70
  -3   6  11   14.20    1.20
   3   6 -11   14.10    1.00
  -3   6  11   14.60    0.80
  -3  -6  13    6.50    1.10
   3  -6 -13    7.80    1.20
  -3  -6  13    8.60    0.90
  -3   6  13    7.80    0.60
  -3   6  13    7.00    0.80
  -3   6  13    7.10    0.60
   3   6 -13    7.30    0.90
  -3   6  13    5.20    1.10
  -3  -6  15    1.10    0.50
   3  -6 -15   -0.50    0.50
  -3  -6  15    0.00    0.60
  -3   6  15    0.50    0.30
  -3   6  15    0.20    0.70
   3   6 -15    0.30    0.60
  -3   6  15   -0.40    0.50
  -3  -6  17    7.50    1.30
   3  -6 -17    7.40    0.90
  -3  -6  17    6.80    0.90
   3   6 -17    7.50    1.00
  -3   6  17    7.40    0.80
  -3   6  17    6.60    0.90
  -3  -6  19   12.80    1.20
  -3  -6  19   14.30    1.40
   3  -6 -19   12.40    1.10
  -3   6  19   13.60    1.20
  -3   6  19   14.90    1.10
   3   6 -19   12.10    1.20
  -3  -6  21   35.10    1.80
   3  -6 -21   31.80    1.80
  -3   6  21   36.00    1.90
  -3   6  21   34.30    1.70
   3   6 -21   36.30    1.90
  -3  -6  23    1.40    0.80
  -3  -6  23    2.00    0.70
   3  -6 -23    0.70    0.90
  -3   6  23    3.50    0.70
   3   6 -23   -0.10    0.80
  -3   6  23    1.90    0.80
   3  -6 -25   -0.10    0.90
  -3  -6  25   -0.20    0.80
  -3  -6  25    1.00    0.90
   3   6 -25    1.30    0.80
  -3   6  25    0.00    0.90
  -3   6  25    0.80    0.80
  -3  -6  27    4.10    1.00
  -3  -6  27    5.90    1.40
  -3   6  27    4.00    0.90
  -3   6  27    2.70    0.90
   3   6 -27    3.10    1.00
   3  -7  26    0.40    0.90
  -3  -7 -26    0.80    1.40
  -3   7 -26   -0.40    0.90
   3   7  26    0.70    1.20
   3   7  26    0.80    1.10
  -3   7 -26    4.10    2.80
   3  -7  24    1.70    0.90
   3  -7  24    0.30    1.00
  -3  -7 -24    0.60    1.20
  -3   7 -24   -0.80    0.70
   3   7  24   -0.70    0.90
   3   7  24    1.90    1.10
  -3   7 -24   -0.50    2.40
  -3  -7 -22    5.90    1.20
   3  -7  22    7.00    1.30
   3  -7  22    7.10    1.60
  -3   7 -22    8.50    1.10
   3   7  22   11.10    1.70
   3   7  22    8.10    1.40
  -3   7 -22    7.50    2.10
  -3  -7 -20   12.30    1.70
   3  -7  20   13.60    1.50
   3  -7  20   14.00    1.50
   3   7  20   11.80    1.30
   3   7  20   13.20    1.70
  -3   7 -20   12.30    1.10
  -3   7 -20   10.10    3.00
   3  -7  18  123.69    4.50
   3  -7  18  126.39    4.40
  -3   7 -18  130.19    4.40
  -3   7 -18  126.79    5.80
   3   7  18  125.69    4.70
   3   7  18  131.29    5.10
   3  -7  16   51.49    2.20
  -3  -7 -16   48.40    2.40
   3  -7  16   47.30    2.10
  -3   7 -16   47.10    3.20
  -3   7 -16   48.60    2.00
   3   7  16   49.99    2.20
   3   7  16   45.20    2.30
  -3  -7 -14   16.50    1.40
   3  -7  14   17.90    1.20
   3  -7  14   17.50    1.10
  -3   7 -14   19.90    2.10
  -3   7 -14   17.70    1.10
   3   7  14   16.10    1.30
   3   7  14   17.30    1.40
  -3  -7 -12    0.90    0.70
   3  -7  12    0.40    0.50
   3  -7  12   -0.60    0.40
  -3   7 -12    0.50    0.40
   3   7  12   -0.10    0.60
   3   7  12    0.20    0.50
   3  -7  10    7.60    0.90
   3  -7  10    5.80    0.90
  -3  -7 -10    6.30    1.10
  -3   7 -10    4.80    1.10
  -3   7 -10    6.00    0.60
   3   7  10    8.20    0.80
   3   7  10    7.40    1.10
   3  -7   8   59.09    2.20
   3  -7   8   61.69    2.50
  -3  -7  -8   59.69    2.50
  -3   7  -8   55.39    2.10
  -3   7  -8   55.89    2.20
  -3   7  -8   61.89    2.00
   3   7   8   58.69    2.30
   3  -7   6    8.20    0.70
   3  -7   6    8.80    0.90
  -3  -7  -6    6.70    1.00
  -3   7  -6    7.30    0.90
   3   7   6    6.50    0.80
  -3   7  -6    6.90    0.60
  -3   7  -6    7.20    0.70
  -3  -7  -4    8.60    1.10
   3  -7   4    9.70    0.90
  -3   7  -4    8.90    0.80
   3   7   4    9.00    0.90
  -3   7  -4   10.50    0.60
   3  -7   2   22.20    1.20
  -3  -7  -2   22.90    1.40
  -3  -7  -2   23.60    1.50
  -3   7  -2   23.60    1.00
  -3   7  -2   24.90    0.90
   3   7   2   22.70    1.30
  -3  -7   0    7.40    1.20
  -3  -7   0    6.20    1.40
   3  -7   0    8.60    0.80
  -3   7   0    6.40    0.40
   3   7   0    6.50    0.80
  -3  -7   2   14.90    1.30
   3  -7  -2   15.40    0.90
  -3  -7   2   13.80    1.60
   3   7  -2   13.60    1.00
  -3   7   2   14.20    0.60
  -3   7   2   13.40    0.60
  -3  -7   4   20.40    1.30
   3  -7  -4   18.90    1.00
  -3  -7   4   16.80    1.70
  -3   7   4   18.00    0.70
  -3   7   4   16.80    0.70
   3   7  -4   19.10    1.10
  -3  -7   6  136.19    4.70
   3  -7  -6  140.59    4.40
   3  -7  -6  135.69    4.50
  -3  -7   6  134.69    5.10
   3   7  -6  136.89    4.60
  -3   7   6  143.99    4.40
  -3   7   6  142.69    4.40
  -3  -7   8   56.49    2.40
   3  -7  -8   55.79    2.00
   3  -7  -8   51.99    2.20
  -3  -7   8   58.29    2.40
   3   7  -8   57.89    2.20
  -3   7   8   57.29    1.90
  -3   7   8   57.89    2.00
  -3   7   8   56.69    1.90
  -3  -7  10   96.89    3.50
  -3  -7  10   97.09    3.50
   3  -7 -10   90.79    3.50
   3  -7 -10   95.69    3.20
   3   7 -10  101.29    3.30
  -3   7  10   95.49    3.00
  -3   7  10   97.39    3.20
  -3   7  10   89.89    3.20
   3  -7 -12    3.30    0.80
  -3  -7  12    3.10    0.80
  -3  -7  12    2.70    0.70
  -3   7  12    2.70    0.40
  -3   7  12    3.60    0.80
  -3   7  12    3.10    0.60
   3   7 -12    1.70    0.60
   3  -7 -14   39.10    1.70
  -3  -7  14   39.20    2.00
  -3  -7  14   39.60    1.80
  -3   7  14   32.80    1.80
  -3   7  14   39.00    1.60
  -3   7  14   37.30    1.50
  -3   7  14   34.60    1.30
   3   7 -14   37.40    1.70
   3  -7 -16   11.20    1.00
  -3  -7  16    9.80    1.00
  -3  -7  16   13.70    1.50
  -3   7  16   11.30    1.00
  -3   7  16   11.80    0.90
   3   7 -16   13.80    1.20
   3  -7 -18    6.50    1.10
  -3  -7  18    6.20    1.30
  -3   7  18    4.70    1.00
   3   7 -18    5.50    1.10
  -3  -7  20    6.50    1.30
  -3  -7  20    5.80    1.00
   3  -7 -20    6.40    1.30
   3   7 -20    5.80    1.20
  -3   7  20    6.80    1.20
  -3   7  20    6.00    1.00
   3  -7 -22   16.90    1.60
  -3  -7  22   21.10    1.70
  -3  -7  22   20.20    1.40
   3   7 -22   19.10    1.40
  -3  -7  24    0.20    0.80
  -3  -7  24   -0.40    0.90
  -3   7  24    1.60    0.80
  -3   7  24    1.70    0.80
   3   7 -24    1.80    0.80
  -3  -7  26    3.40    1.10
  -3  -7  26    7.10    1.50
   3  -7 -26    4.10    1.10
  -3   7  26    6.80    1.50
  -3   7  26    3.70    1.00
   3   7 -26    3.30    0.90
   3  -8  25    2.40    1.00
  -3  -8 -25    2.10    1.30
   3  -8  25    1.80    1.10
   3   8  25    2.40    1.30
  -3   8 -25    1.20    0.90
  -3   8 -25    4.90    2.70
   3  -8  23    8.90    1.50
  -3  -8 -23    9.00    1.90
   3  -8  23   12.30    1.80
   3   8  23    7.90    2.10
   3   8  23    7.90    1.60
  -3   8 -23    7.30    2.40
  -3   8 -23    7.60    1.30
  -3  -8 -21   17.00    1.80
   3  -8  21   17.60    1.70
   3  -8  21   19.50    1.50
   3   8  21   18.20    1.60
   3   8  21   22.60    1.90
  -3   8 -21   20.30    3.40
  -3   8 -21   15.50    1.30
   3  -8  19   -0.10    0.70
  -3  -8 -19    0.70    1.00
  -3   8 -19    1.00    1.70
  -3   8 -19    0.30    0.60
   3   8  19   -0.60    0.80
   3  -8  17   40.10    2.00
   3  -8  17   38.40    1.90
  -3   8 -17   41.40    1.80
   3   8  17   43.20    2.30
   3   8  17   40.90    2.00
  -3  -8 -15    8.90    1.60
   3  -8  15   13.00    1.20
   3  -8  15   11.70    1.10
   3   8  15    9.70    1.50
   3   8  15    8.20    1.10
  -3   8 -15   15.10    2.30
  -3   8 -15   11.60    1.00
   3  -8  13   31.70    1.50
   3  -8  13   32.30    1.50
  -3  -8 -13   32.60    2.00
  -3   8 -13   33.90    1.40
   3   8  13   31.00    1.70
   3   8  13   31.90    1.90
  -3  -8 -11    0.90    0.80
   3  -8  11    0.80    0.90
   3  -8  11    0.50    0.40
   3   8  11    1.10    0.70
   3   8  11    0.40    0.60
  -3   8 -11    0.00    0.40
   3  -8   9   22.60    1.20
  -3  -8  -9   23.20    1.60
   3  -8   9   25.00    1.50
  -3   8  -9   23.30    1.00
   3   8   9   22.90    1.30
  -3   8  -9   22.60    1.40
   3  -8   7   32.00    1.40
  -3  -8  -7   33.60    1.80
  -3   8  -7   29.10    1.30
   3   8   7   30.90    1.50
  -3   8  -7   32.90    1.20
  -3   8  -7   31.30    1.50
   3  -8   5   73.69    2.70
  -3  -8  -5   73.29    2.90
   3   8   5   72.69    2.80
  -3   8  -5   72.99    2.60
  -3   8  -5   78.39    2.50
   3  -8   3  380.06   12.00
  -3  -8  -3  391.86   12.20
  -3   8  -3  388.06   12.00
   3   8   3  393.66   12.20
  -3  -8  -1    4.30    1.00
   3  -8   1    2.50    0.50
  -3  -8  -1    3.10    0.90
  -3   8  -1    3.30    0.60
  -3   8  -1    3.70    0.50
   3   8   1    2.60    0.50
   3  -8  -1    2.90    0.70
  -3  -8   1    2.50    0.60
  -3  -8   1    4.30    1.00
  -3   8   1    3.10    0.40
   3   8  -1    4.60    0.70
   3  -8  -3   27.40    1.30
  -3  -8   3   26.80    2.10
  -3  -8   3   25.60    1.50
  -3   8   3   28.40    1.00
   3   8  -3   28.70    1.40
  -3  -8   5    0.60    0.60
  -3  -8   5   -0.40    0.90
   3  -8  -5    0.00    0.50
  -3   8   5    0.70    0.30
   3   8  -5    0.30    0.40
   3  -8  -7    3.40    0.90
  -3  -8   7    5.10    1.10
   3  -8  -7    3.30    0.80
   3   8  -7    5.40    0.90
  -3   8   7    5.30    0.50
  -3   8   7    4.90    0.50
  -3  -8   9   17.20    1.30
   3  -8  -9   13.40    1.20
   3  -8  -9   16.10    1.10
  -3  -8   9   19.50    1.30
   3   8  -9   17.90    1.10
  -3   8   9   18.10    0.90
  -3   8   9   16.00    0.70
  -3   8   9   18.20    0.90
  -3  -8  11    1.50    0.80
  -3  -8  11    1.90    0.70
   3   8 -11    2.10    0.60
  -3   8  11    1.90    0.40
  -3   8  11    3.20    0.60
  -3  -8  13   19.90    1.50
   3  -8 -13   21.30    1.40
  -3  -8  13   22.80    1.80
  -3   8  13   20.00    1.10
   3   8 -13   21.10    1.30
  -3   8  13   21.30    1.00
  -3  -8  15   80.69    3.10
   3  -8 -15   80.69    3.00
  -3  -8  15   82.19    3.20
  -3   8  15   81.79    2.90
   3   8 -15   80.69    3.00
  -3   8  15   79.09    2.80
  -3  -8  17   47.20    2.30
   3  -8 -17   44.40    2.10
  -3   8  17   44.00    1.80
  -3   8  17   43.40    1.90
  -3  -8  19   57.59    2.60
   3  -8 -19   63.39    2.60
  -3  -8  19   63.39    2.70
  -3   8  19   61.49    2.50
   3   8 -19   60.49    2.50
  -3   8  19   61.09    2.30
  -3  -8  21   11.80    1.20
   3  -8 -21    9.90    1.40
  -3  -8  21   10.90    1.70
  -3   8  21    9.60    1.20
   3   8 -21   11.70    1.30
  -3   8  21   11.50    1.30
  -3  -8  23   20.90    1.60
  -3  -8  23   24.80    1.80
   3  -8 -23   20.10    2.10
  -3   8  23   24.90    1.70
   3   8 -23   23.80    1.50
  -3   8  23   25.50    1.60
   3  -8 -25   15.20    1.90
  -3  -8  25   15.80    1.60
  -3  -8  25   18.00    1.90
  -3   8  25   17.30    1.50
   3   8 -25   16.70    1.60
  -3   8  25   18.80    1.60
  -3  -8  27    3.30    1.10
   3  -9  24   14.70    1.80
  -3  -9 -24   14.60    2.40
   3  -9  24   18.90    2.00
  -3   9 -24   16.50    1.60
   3   9  24   19.50    1.90
  -3   9 -24   16.90    4.50
   3   9  24   21.10    2.40
   3  -9  22   15.20    1.60
   3  -9  22   13.40    1.70
   3   9  22   13.50    2.10
  -3   9 -22   13.10    1.30
  -3   9 -22   19.60    3.70
   3   9  22   13.50    1.70
  -3  -9 -20   15.00    1.90
   3  -9  20   18.30    1.60
   3  -9  20   20.70    1.70
   3   9  20   21.30    1.70
   3   9  20   17.20    2.10
  -3   9 -20   16.40    3.30
  -3   9 -20   19.00    1.30
   3  -9  18    3.30    0.70
  -3  -9 -18    1.40    1.00
  -3   9 -18    2.50    1.70
  -3   9 -18    3.70    0.70
   3   9  18    3.80    0.80
   3  -9  16   30.80    1.60
   3  -9  16   26.70    1.60
  -3  -9 -16   28.50    2.00
  -3   9 -16   31.40    1.50
   3   9  16   28.30    2.00
   3   9  16   31.80    1.80
   3  -9  14   24.00    1.30
  -3  -9 -14   23.50    1.80
   3  -9  14   21.00    1.40
  -3   9 -14   23.60    1.20
   3   9  14   21.90    1.80
   3  -9  12   18.20    1.20
  -3  -9 -12   15.90    1.70
   3  -9  12   20.20    1.30
   3   9  12   18.00    1.40
   3   9  12   22.50    1.60
  -3   9 -12   21.40    1.10
  -3  -9 -10  209.68    7.00
   3  -9  10  211.18    6.90
   3  -9  10  201.08    6.60
   3   9  10  205.48    6.80
  -3   9 -10  207.48    6.50
   3  -9   8  116.99    4.00
   3  -9   8  111.19    3.70
  -3  -9  -8  112.29    4.20
  -3   9  -8  107.69    3.70
   3   9   8  111.79    3.90
  -3   9  -8  116.29    3.60
  -3   9  -8  101.99    3.60
  -3  -9  -6    7.80    1.30
  -3   9  -6   10.90    0.70
  -3   9  -6   10.40    1.00
   3   9   6    9.30    1.00
  -3  -9  -4   16.80    1.40
   3  -9   4   13.80    1.30
  -3   9  -4   14.00    0.70
  -3   9  -4   13.30    1.00
   3   9   4   14.50    1.10
   3  -9   2   43.10    1.90
  -3  -9  -2   48.20    2.50
  -3  -9  -2   41.80    2.10
  -3   9  -2   45.00    1.50
  -3   9  -2   42.20    1.60
   3   9   2   42.80    1.80
  -3  -9   0    0.50    0.70
   3  -9   0    3.80    0.90
   3   9   0    1.90    0.50
   3  -9  -2    1.30    0.50
  -3  -9   2    0.10    0.70
  -3   9   2    0.00    0.30
   3   9  -2    0.50    0.50
  -3  -9   4   35.30    1.90
   3  -9  -4   36.60    1.60
  -3  -9   4   36.20    2.10
  -3   9   4   33.80    1.30
   3   9  -4   37.80    1.60
  -3  -9   6    1.80    0.70
   3  -9  -6    1.20    0.60
  -3  -9   6    1.60    0.70
   3   9  -6    1.10    0.60
  -3   9   6    1.80    0.40
   3  -9  -8   26.80    1.50
   3  -9  -8   22.60    1.40
  -3  -9   8   28.10    1.70
  -3  -9   8   27.80    1.60
   3   9  -8   26.80    1.40
  -3   9   8   27.00    1.10
  -3   9   8   26.50    1.10
  -3   9   8   26.50    1.00
  -3  -9  10   41.70    2.10
  -3  -9  10   42.00    2.00
   3  -9 -10   34.70    1.80
  -3   9  10   40.10    1.50
  -3   9  10   38.50    1.60
   3   9 -10   43.10    1.80
  -3   9  10   41.30    1.60
   3  -9 -12    6.50    1.10
  -3  -9  12    7.30    1.30
  -3  -9  12    8.60    1.40
  -3   9  12    8.20    0.80
   3   9 -12    7.60    1.10
  -3   9  12    6.80    0.70
  -3  -9  14    2.50    0.80
   3  -9 -14    3.10    0.70
   3   9 -14    2.50    0.60
  -3   9  14    2.70    0.50
  -3   9  14    2.10    0.50
  -3  -9  16    1.00    0.70
   3  -9 -16   -0.10    0.80
  -3  -9  16   -0.20    0.70
  -3   9  16    1.20    0.50
   3   9 -16    1.30    0.70
  -3  -9  18   19.30    1.30
  -3  -9  18   17.10    1.60
   3  -9 -18   18.70    1.50
  -3   9  18   17.70    1.20
  -3   9  18   17.40    1.20
   3   9 -18   17.00    1.30
  -3  -9  20   24.20    1.60
   3  -9 -20   23.50    1.80
   3   9 -20   26.20    1.60
  -3   9  20   25.60    1.60
  -3   9  20   26.50    1.40
   3  -9 -22   -0.40    1.00
  -3  -9  22    0.50    0.80
  -3  -9  22    1.10    0.90
  -3   9  22    2.00    0.80
   3   9 -22    0.10    0.90
   3  -9 -24    3.70    1.30
  -3  -9  24    3.90    0.90
  -3  -9  24    4.80    1.10
  -3   9  24    6.40    1.40
   3   9 -24    8.30    1.30
  -3   9  24    6.20    0.90
  -3 -10 -23    4.10    1.60
   3 -10  23    5.90    1.50
  -3  10 -23    5.90    2.90
   3  10  23    4.10    1.40
   3  10  23    5.30    1.10
  -3  10 -23    5.20    0.90
  -3 -10 -21   22.00    2.20
   3 -10  21   21.00    1.70
  -3  10 -21   23.20    4.20
   3  10  21   21.80    2.30
   3  10  21   23.90    1.90
  -3  10 -21   23.50    1.50
   3 -10  19    1.90    0.80
  -3 -10 -19   -0.40    1.10
   3  10  19    2.20    1.10
  -3  10 -19    3.30    1.90
   3  10  19    0.40    0.90
   3 -10  17   16.20    1.60
   3 -10  17   16.30    1.40
  -3 -10 -17   14.80    2.00
  -3  10 -17   16.30    1.20
   3  10  17   16.40    1.60
   3  10  17   14.30    1.90
   3 -10  15    2.90    0.70
  -3 -10 -15    2.20    1.00
   3 -10  15    2.80    0.70
   3  10  15    3.10    0.80
  -3  10 -15    3.70    0.80
   3  10  15    2.90    0.90
   3 -10  13    6.40    1.10
   3 -10  13    5.40    1.00
   3  10  13    7.20    1.20
  -3  10 -13    5.20    0.80
  -3 -10 -11    1.30    1.00
   3 -10  11    0.70    0.60
   3 -10  11    0.00    0.80
  -3  10 -11    1.00    0.50
   3  10  11    1.10    0.80
  -3 -10  -9   27.80    1.90
   3 -10   9   28.90    1.30
   3 -10   9   30.30    1.80
   3  10   9   31.70    1.70
  -3  10  -9   32.00    1.30
   3 -10   7   14.20    1.30
  -3 -10  -7   15.10    1.60
   3  10   7   12.10    1.20
  -3  10  -7   15.00    0.80
   3 -10   5    7.90    1.30
  -3 -10  -5    8.30    1.30
   3  10   5    7.40    1.10
  -3  10  -5    9.10    1.40
  -3  10  -5    9.20    0.60
  -3 -10  -3    6.90    1.40
  -3  10  -3    2.30    0.50
  -3  10  -3    1.70    0.50
   3  10   3    1.10    0.60
  -3 -10  -1    0.30    0.70
   3 -10   1    1.80    0.90
  -3 -10  -1    3.30    1.00
   3  10   1    0.80    0.60
  -3  10  -1   -0.10    0.40
  -3  10  -1    0.80    0.30
  -3 -10   1    8.60    1.40
  -3 -10   1   10.90    1.70
   3 -10  -1   11.20    1.30
   3  10  -1    9.40    1.00
  -3  10   1    7.80    0.60
  -3  10   1    8.20    0.70
  -3 -10   3   -0.20    0.70
   3 -10  -3    1.50    0.70
  -3 -10   3    0.70    0.90
  -3  10   3   -0.10    0.30
   3  10  -3    0.20    0.60
  -3  10   3   -0.30    0.30
  -3 -10   5   34.60    2.00
  -3 -10   5   34.50    1.90
   3 -10  -5   36.60    1.90
  -3  10   5   33.90    1.30
   3  10  -5   35.40    1.70
  -3  10   5   35.80    1.30
  -3 -10   7   35.30    1.80
  -3 -10   7   35.20    2.10
   3  10  -7   36.30    1.70
  -3  10   7   35.80    1.30
  -3 -10   9   14.40    1.40
  -3 -10   9   16.50    1.60
   3 -10  -9   18.50    1.50
   3  10  -9   16.40    1.20
  -3  10   9   15.90    0.80
  -3  10   9   14.50    0.80
   3 -10 -11    9.50    1.20
  -3 -10  11    9.60    1.60
  -3 -10  11    8.20    1.30
  -3  10  11    7.20    0.80
  -3  10  11   10.10    0.70
   3  10 -11    9.60    1.10
   3 -10 -13   23.60    1.50
  -3 -10  13   24.10    1.60
  -3  10  13   24.00    1.20
  -3  10  13   23.80    1.10
  -3 -10  15    1.40    0.80
   3 -10 -15    2.50    0.80
  -3  10  15    1.80    0.50
  -3  10  15    2.10    0.50
   3  10 -15    4.00    1.00
  -3 -10  17    6.10    1.20
   3 -10 -17    3.00    1.00
  -3 -10  17    4.10    0.80
  -3  10  17    4.10    1.00
   3  10 -17    4.60    1.10
  -3  10  17    4.70    1.00
  -3 -10  19    2.20    0.90
   3 -10 -19   -0.30    1.00
  -3 -10  19    3.60    0.80
  -3  10  19    4.10    0.70
   3  10 -19    5.20    1.20
  -3  10  19    2.50    0.70
   3 -10 -21   20.60    1.80
  -3 -10  21   20.40    1.70
  -3 -10  21   23.10    1.80
   3  10 -21   20.60    1.60
  -3  10  21   21.40    1.60
  -3  10  21   24.70    1.40
   3 -10 -23    2.10    1.40
  -3 -10  23    4.30    1.00
  -3  10  23    4.70    0.90
   3  10 -23    6.70    1.30
  -3 -11 -22   10.30    2.40
   3 -11  22   14.30    1.80
   3  11  22   12.60    2.50
   3  11  22   11.50    1.90
  -3  11 -22   15.60    4.30
  -3  11 -22   11.50    1.50
  -3 -11 -20   -0.10    1.40
   3 -11  20    0.90    0.90
  -3  11 -20   -2.60    2.20
   3  11  20    0.50    1.00
   3  11  20    0.80    1.30
  -3  11 -20    0.30    0.70
  -3 -11 -18   40.30    2.60
   3 -11  18   38.50    2.10
   3  11  18   40.20    2.60
   3  11  18   45.90    2.30
  -3  11 -18   44.20    1.90
   3 -11  16   12.00    1.60
  -3 -11 -16   15.40    1.90
   3  11  16    9.60    1.50
  -3  11 -16   11.30    1.00
   3  11  16   12.70    1.90
  -3 -11 -14   52.99    2.90
   3 -11  14   54.49    2.30
   3  11  14   53.39    2.50
  -3 -11 -12   28.90    2.00
  -3  11 -12   26.90    1.30
   3  11  12   28.20    1.80
   3 -11  10    2.30    0.90
  -3 -11 -10    0.50    1.10
  -3  11 -10    1.30    0.50
   3  11  10    0.70    0.70
   3 -11   8   54.09    2.50
  -3 -11  -8   57.29    2.70
  -3  11  -8   60.29    2.10
  -3 -11  -6   72.69    3.20
   3 -11   6   77.89    3.00
  -3  11  -6   77.99    2.50
   3  11   6   72.39    2.90
  -3 -11  -4   70.09    2.90
   3 -11   4   68.89    2.80
  -3 -11  -4   70.59    3.10
  -3  11  -4   66.19    2.30
   3  11   4   67.29    2.70
   3 -11   2   40.70    2.00
  -3 -11  -2   43.50    2.40
  -3 -11  -2   44.10    2.30
   3  11   2   43.10    2.00
  -3  11  -2   43.80    1.60
  -3 -11   0    7.90    1.50
   3 -11   0   10.10    1.40
   3  11   0   13.80    1.20
  -3  11   0   12.00    0.70
  -3 -11   2   35.90    2.00
   3 -11  -2   36.30    2.00
  -3 -11   2   34.20    2.00
   3  11  -2   33.60    1.70
  -3  11   2   34.00    1.20
  -3 -11   4    9.30    1.40
   3 -11  -4    7.90    1.30
  -3 -11   4    6.20    1.10
  -3  11   4    7.40    0.60
   3  11  -4    6.90    1.00
  -3 -11   6   23.10    1.90
  -3 -11   6   20.60    1.50
   3 -11  -6   20.90    1.50
  -3  11   6   22.20    0.90
   3  11  -6   20.90    1.40
  -3 -11   8  140.39    4.80
  -3 -11   8  136.39    5.10
   3 -11  -8  142.59    4.80
  -3  11   8  139.79    4.40
   3  11  -8  134.49    4.90
  -3 -11  10   14.60    1.40
   3 -11 -10   15.00    1.40
   3  11 -10   12.60    1.50
  -3  11  10   14.30    0.90
  -3 -11  12   11.60    1.70
   3 -11 -12   10.00    1.40
  -3 -11  12   12.50    1.40
   3  11 -12   11.60    1.40
  -3  11  12   13.10    0.90
  -3 -11  14   25.30    2.00
  -3 -11  14   25.10    1.70
   3 -11 -14   25.40    1.80
  -3  11  14   28.00    1.30
   3  11 -14   27.50    1.60
   3 -11 -16   13.30    1.70
  -3 -11  16   14.70    1.40
   3  11 -16   17.60    1.40
  -3  11  16   14.50    1.10
   3 -11 -18    1.70    1.10
  -3 -11  18    1.90    0.80
   3  11 -18    2.20    0.80
  -3  11  18    3.00    0.70
  -3 -11  20   29.50    2.00
  -3 -11  20   27.30    1.80
   3  11 -20   29.80    1.80
  -3  11  20   30.30    1.80
  -3 -11  22    0.50    1.00
  -3 -11  22    2.20    1.00
   3  11 -22    0.70    1.00
  -3 -12 -19    0.90    1.50
   3 -12  19    1.90    1.00
   3  12  19   -0.50    1.10
  -3  12 -19    0.40    2.30
   3  12  19    1.80    1.70
  -3  12 -19    1.50    0.80
   3 -12  17   19.00    1.60
  -3 -12 -17   14.90    2.50
  -3  12 -17   16.90    1.20
   3  12  17   16.80    1.80
  -3 -12 -15    8.00    2.00
  -3  12 -15    6.50    1.00
  -3 -12 -13    5.10    1.20
   3  12  13    7.20    1.50
  -3 -12 -11    0.60    1.20
   3 -12  11    1.00    0.90
   3  12  11    2.10    0.80
  -3 -12  -9   17.00    1.90
   3 -12   9   15.40    1.80
   3  12   9   15.10    1.50
  -3  12  -9   15.90    0.90
   3 -12   7   74.39    3.10
  -3  12  -7   77.49    2.70
   3  12   7   80.59    3.10
   3 -12   5    3.50    0.90
  -3 -12  -5    2.70    1.00
  -3  12  -5    2.50    0.60
   3  12   5    4.40    1.10
  -3 -12  -3   23.90    2.00
   3 -12   3   23.70    1.70
  -3 -12  -3   24.10    2.00
  -3  12  -3   23.70    1.00
  -3 -12  -1   42.60    2.30
   3 -12   1   42.00    2.10
  -3 -12  -1   45.40    2.40
  -3  12  -1   46.20    1.60
  -3 -12   1    5.60    1.10
   3 -12  -1    6.80    1.30
  -3 -12   1    7.60    1.50
  -3  12   1    4.90    0.60
  -3 -12   3    0.90    0.80
   3 -12  -3    0.60    0.80
  -3 -12   3    0.90    1.00
  -3  12   3    1.10    0.30
   3 -12  -5  106.49    3.90
  -3 -12   5  110.09    4.30
  -3 -12   5  104.29    3.80
  -3  12   5  107.89    3.40
   3  12  -5   99.69    4.10
  -3 -12   7   11.20    1.30
   3 -12  -7   10.80    1.40
   3  12  -7   12.00    1.20
  -3  12   7   12.90    0.80
   3 -12  -9   14.80    1.70
  -3 -12   9   17.40    1.50
  -3 -12   9   19.60    1.90
   3  12  -9   17.80    1.40
  -3  12   9   17.50    0.90
  -3 -12  11    3.00    1.00
  -3 -12  11    0.40    0.70
   3 -12 -11    1.50    0.90
   3  12 -11    1.70    0.70
  -3  12  11    2.10    0.50
   3 -12 -13    4.30    1.00
  -3 -12  13    2.70    0.80
  -3 -12  13    3.80    1.00
  -3  12  13    3.30    0.80
   3  12 -13    3.30    0.80
  -3 -12  15    6.70    1.80
   3 -12 -15    5.70    1.30
  -3 -12  15    5.90    0.90
  -3  12  15    7.90    1.00
   3  12 -15    8.60    1.30
   3  12 -17    8.70    1.30
   3  12 -19    1.00    0.90
  -3 -12  21    4.00    1.00
  -3 -13 -18    1.20    1.70
   3 -13  18   -0.30    1.00
  -3  13 -18    0.10    0.80
   3  13  18   -0.40    1.20
   3 -13  16    2.40    0.90
  -3 -13 -16    2.20    1.50
   3  13  16    1.20    1.00
  -3  13 -16    1.10    0.70
  -3 -13 -14    5.60    1.50
  -3  13 -14    6.70    1.00
   3 -13  12    5.50    1.10
  -3 -13 -12    5.30    1.30
  -3  13 -12    5.60    0.80
   3  13  12    7.30    1.50
  -3 -13 -10    2.50    1.30
   3 -13  10    2.30    1.00
   3  13  10    1.90    0.90
  -3  13 -10    1.80    0.50
   3 -13   8    3.10    1.00
  -3 -13  -8    2.10    1.20
   3  13   8    3.00    0.80
  -3  13  -8    2.50    0.50
  -3 -13  -6    5.00    1.20
   3 -13   6    6.70    1.60
  -3  13  -6    5.20    0.70
   3  13   6    6.80    1.20
   3 -13   4    4.90    0.90
  -3 -13  -4    3.60    1.20
   3  13   4    4.30    0.80
  -3  13  -4    5.00    0.70
   3 -13   2   12.00    1.60
  -3 -13  -2   15.20    1.80
  -3  13  -2   13.60    0.80
   3  13   2   11.60    1.40
   3 -13   0    2.50    0.90
  -3 -13   0    3.50    1.20
   3  13   0    2.00    0.80
  -3  13   0    2.20    0.40
   3 -13  -2   50.59    2.40
  -3 -13   2   50.49    2.80
   3  13  -2   53.59    2.30
  -3  13   2   52.29    1.80
  -3 -13   4   82.79    3.60
   3 -13  -4   81.89    3.40
  -3  13   4   84.09    2.80
   3  13  -4   82.89    3.20
  -3 -13   6    1.70    1.10
   3 -13  -6    1.20    0.90
   3  13  -6    2.90    0.70
  -3  13   6    2.70    0.60
   3 -13  -8    3.40    1.00
  -3 -13   8    2.20    1.10
   3  13  -8    3.30    0.80
  -3  13   8    3.70    0.70
   3 -13 -10    0.70    1.70
   3  13 -10    3.10    0.80
  -3 -13  12    0.70    1.10
   3  13 -12    0.60    0.80
  -3 -13  14    3.30    1.20
   3  13 -14    7.60    1.30
   3  13 -16    9.30    1.40
  -3 -13  18    8.80    1.70
   3  13 -18    8.90    1.40
  -3 -14 -15   24.70    2.80
   3 -14  15   17.20    1.80
  -3  14 -15   16.60    1.20
  -3 -14 -13   -0.80    1.60
   3  14  13    0.60    1.00
  -3  14 -13    1.40    0.70
  -3 -14 -11    5.00    1.50
   3  14  11    9.10    1.70
  -3 -14  -9    1.50    1.20
   3 -14   9    3.20    1.10
   3  14   9    1.30    0.90
  -3 -14  -7    1.70    1.20
   3 -14   7    4.30    1.10
  -3  14  -7    0.60    0.50
   3  14   7    2.80    0.90
  -3 -14  -5   11.30    2.10
   3 -14   5    7.40    1.90
  -3  14  -5    6.80    0.80
  -3 -14  -3   67.29    3.20
   3 -14   3   66.49    3.10
  -3  14  -3   69.39    2.40
   3  14   3   71.19    2.90
   3 -14   1   51.69    2.70
  -3 -14  -1   52.09    2.90
   3  14   1   51.49    2.40
  -3  14  -1   49.70    1.80
  -3 -14   1    4.80    1.10
   3 -14  -1    4.70    1.40
   3  14  -1    4.80    0.90
  -3 -14   3    7.60    2.00
   3  14  -3    9.50    1.30
  -3 -14   5    5.40    1.10
   3  14  -5    4.90    1.20
  -3 -14   7    6.50    1.30
   3  14  -7    8.70    1.30
  -3 -14   9    3.00    1.20
   3  14  -9    5.80    1.30
  -3 -14  11   13.10    2.20
   3  14 -11   11.50    1.40
  -3 -14  13   23.40    2.50
   3  14 -13   22.60    1.70
  -3 -14  15    3.40    1.50
   3  14 -15    1.40    0.90
  -3 -15 -12    2.60    1.50
   3  15  12    7.50    1.80
  -3 -15 -10    4.60    1.50
   3  15  10    8.30    1.60
  -3 -15  -8   17.30    2.50
   3  15   8   12.10    1.60
  -3 -15  -6   -2.20    1.40
   3  15   6    2.00    0.90
  -3 -15  -4    1.10    1.20
   3  15   4    1.20    0.90
  -3 -15  -2    3.10    1.20
   3  15   2    4.40    0.90
  -3 -15   0    2.70    1.30
   3  15   0    4.70    0.90
  -3 -15   2    0.40    1.20
   3  15  -2    1.90    0.90
  -3 -15   4   13.80    2.10
   3  15  -4   15.60    1.50
  -3 -15   6   10.20    2.10
   3  15  -6    0.70    0.90
  -3 -15   8    1.70    1.20
   3  15  -8    3.00    0.90
  -3 -15  10   11.50    2.10
   3  15 -10    9.50    1.50
  -3 -15  12   17.10    2.40
   3  15 -12   19.00    1.60
  -3 -16  -7   17.40    2.80
   3  16   7   21.50    1.90
  -3 -16  -5   -2.30    1.50
   3  16   5    1.00    1.00
  -3 -16  -3    1.10    1.60
   3  16   3    3.30    1.00
  -3 -16  -1    1.40    1.50
   3  16   1    2.10    1.00
  -3 -16   1    4.40    1.50
   3  16  -1    6.80    1.50
  -3 -16   3   11.40    2.30
   3  16  -3   15.00    1.60
  -3 -16   5   17.40    2.60
   3  16  -5   19.10    1.70
  -3 -16   7   20.10    2.50
   3  16  -7   18.00    1.60
  -4   0 -28    2.00    1.20
   4   0  28    3.00    1.00
   4   0  28    4.00    1.30
  -4   0 -28   -2.50    2.60
   4   0  26   -1.00    0.80
   4   0  26    1.60    1.10
  -4   0 -26   -1.50    1.00
  -4   0 -26    0.20    2.40
   4   0  24    7.50    1.70
  -4   0 -24    7.70    1.40
   4   0  24    9.20    1.30
   4   0  22   13.10    1.60
   4   0  22   16.20    1.80
  -4   0 -22   15.80    3.40
  -4   0 -22   18.50    1.50
   4   0  20  440.36   14.00
   4   0  20  444.86   14.30
  -4   0 -20  437.46   15.40
  -4   0 -20  448.26   14.00
   4   0  18   87.19    3.50
  -4   0 -18   91.19    3.30
  -4   0 -18   87.49    4.70
   4   0  18   87.19    3.20
   4   0  16   22.40    1.20
  -4   0 -16   24.00    1.30
  -4   0 -16   23.10    2.50
   4   0  16   20.90    1.60
  -4   0 -14  115.99    3.80
   4   0  14  114.19    4.10
  -4   0 -14  109.89    5.00
   4   0  14  108.29    3.80
   4   0  12   36.40    1.60
  -4   0 -12   38.40    1.60
  -4   0 -12   37.20    2.60
   4   0  12   36.40    1.80
  -4   0 -10   13.00    2.00
  -4   0 -10   10.70    0.80
   4   0  10   11.40    1.30
  -4   0 -10   13.10    1.00
  -4   0  -8    2.20    1.40
  -4   0  -8    3.80    0.70
   4   0   8    2.10    0.50
   4   0   8    2.80    1.00
  -4   0  -6  110.79    3.60
   4   0   6  110.69    4.40
   4   0   6  106.19    3.50
  -4   0  -6  111.79    3.60
   4   0   6  113.19    3.60
  -4   0  -4  202.88    6.20
  -4   0  -4  206.18    7.10
   4   0   4  190.68    6.90
  -4   0  -4  200.08    6.20
  -4   0  -4  194.98    6.40
   4   0   4  209.38    6.20
   4   0   4  191.28    6.20
   4   0   2  523.15   16.60
  -4   0  -2  550.14   16.70
  -4   0  -2  491.05   16.10
  -4   0  -2  538.25   15.90
   4   0   2  525.55   15.90
   4   0   2  515.15   15.90
  -4   0  -2  525.55   15.90
  -4   0   0  837.72   25.30
   4   0   0  807.82   24.70
   4   0   0  812.12   24.70
   4   0   0  828.72   25.40
  -4   0   0  833.62   24.70
  -4   0   0  790.72   24.70
  -4   0   2   82.09    3.10
   4   0  -2   80.89    2.60
   4   0  -2   81.29    3.10
  -4   0   2   75.79    2.90
   4   0  -2   78.49    2.50
   4   0  -4  612.64   18.40
   4   0  -4  618.54   18.10
   4   0  -4  601.14   18.00
  -4   0   4  601.84   18.40
  -4   0   4  587.54   17.90
  -4   0   4  617.54   18.40
   4   0  -4  568.44   18.30
  -4   0   4  552.24   18.00
   4   0  -6   30.20    1.60
  -4   0   6   31.60    1.90
  -4   0   6   31.10    1.10
   4   0  -6   31.10    1.20
   4   0  -6   32.30    1.60
  -4   0   6   32.60    1.10
   4   0  -8   33.50    1.40
  -4   0   8   36.90    1.30
   4   0  -8   35.50    1.40
   4   0  -8   37.40    1.60
  -4   0   8   35.60    1.30
   4   0 -10   20.70    1.10
  -4   0  10   19.90    1.00
  -4   0  10   20.70    1.80
   4   0 -10   21.80    1.10
  -4   0  10   21.00    1.10
   4   0 -12    7.80    0.70
   4   0 -12    7.40    0.80
  -4   0  12    7.40    0.70
  -4   0  12    6.70    1.20
  -4   0  12    7.20    0.70
  -4   0  14   26.30    1.60
  -4   0  14   23.30    1.10
  -4   0  14   25.60    1.10
   4   0 -14   28.10    1.10
   4   0 -14   24.00    1.40
   4   0 -16  247.98    7.80
  -4   0  16  251.27    7.90
  -4   0  16  244.28    8.10
   4   0 -16  254.47    7.80
   4   0 -18  235.28    7.40
   4   0 -18  234.78    7.40
  -4   0  18  232.98    7.50
  -4   0  18  230.98    7.70
   4   0 -20    8.90    1.00
  -4   0  20    8.10    1.20
  -4   0  20    5.90    0.80
  -4   0  22    1.00    0.50
   4   0 -22    0.60    0.60
   4   0 -24   17.00    1.30
  -4   0  24   19.30    1.60
  -4   0  24   17.30    1.30
   4   0 -26    1.70    0.90
  -4   0  26    2.90    0.90
  -4   0  26    2.90    0.70
  -4   0  28   28.60    1.80
   4   0 -28   29.50    1.80
  -4   0  28   32.90    2.20
  -4   0  30   -1.50    1.00
  -4   0  30   -1.40    1.00
   4   0 -30   -1.90    1.10
  -4  -1 -27    1.50    2.80
   4  -1  27    0.90    0.90
  -4  -1 -27   -0.50    1.10
   4  -1  27    2.10    1.20
   4   1  27    0.10    1.00
  -4   1 -27    2.10    2.70
  -4   1 -27   -0.50    1.00
   4   1  27    1.30    1.20
   4  -1  25    0.40    1.00
  -4  -1 -25   -3.40    2.60
  -4  -1 -25   -0.20    1.00
   4   1  25    0.30    0.80
  -4   1 -25    0.60    0.90
  -4   1 -25    0.50    2.40
   4  -1  23   12.20    1.60
  -4  -1 -23   15.60    3.40
  -4  -1 -23   12.50    1.50
   4  -1  23   11.10    1.30
  -4   1 -23   10.40    1.40
  -4   1 -23   11.50    3.50
   4   1  23   12.50    1.40
   4   1  23   11.30    1.70
  -4  -1 -21   26.20    1.70
  -4  -1 -21   28.60    3.30
   4  -1  21   24.20    1.50
   4   1  21   23.30    1.80
  -4   1 -21   31.70    3.60
  -4   1 -21   24.40    1.60
  -4  -1 -19   51.69    2.30
   4  -1  19   51.69    2.60
   4  -1  19   52.99    2.20
  -4  -1 -19   52.89    3.60
  -4   1 -19   50.19    3.70
   4   1  19   49.20    2.50
  -4   1 -19   50.79    2.20
   4   1  19   51.79    2.20
  -4  -1 -17   24.70    1.50
  -4  -1 -17   24.30    2.60
   4  -1  17   23.90    1.70
   4  -1  17   24.90    1.30
  -4   1 -17   21.40    1.30
   4   1  17   22.90    1.30
  -4   1 -17   26.20    3.00
   4   1  17   22.50    1.70
   4  -1  15   26.90    1.40
  -4  -1 -15   23.40    2.60
   4  -1  15   28.50    1.60
  -4  -1 -15   29.40    1.40
   4   1  15   26.40    1.60
  -4   1 -15   27.10    1.40
  -4   1 -15   27.30    2.60
   4   1  15   26.80    1.40
   4  -1  13   11.40    1.10
  -4  -1 -13   13.00    1.00
   4  -1  13   12.30    0.90
  -4  -1 -13   11.10    2.00
  -4   1 -13   12.70    2.00
   4   1  13   13.40    0.90
   4   1  13   13.30    1.20
  -4   1 -13   12.90    0.90
   4  -1  11  209.98    7.00
  -4  -1 -11  218.38    6.80
  -4  -1 -11  215.48    7.90
   4  -1  11  210.78    7.00
  -4   1 -11  199.88    6.70
   4   1  11  209.98    7.00
  -4   1 -11  210.58    7.90
  -4   1 -11  219.58    6.70
   4   1  11  213.98    6.80
  -4  -1  -9   25.10    1.40
   4  -1   9   25.50    1.20
  -4  -1  -9   27.30    2.50
  -4  -1  -9   22.40    1.20
   4  -1   9   25.40    1.70
   4   1   9   24.60    1.60
  -4   1  -9   26.30    2.50
  -4   1  -9   23.90    1.20
  -4   1  -9   26.60    1.40
   4   1   9   24.90    1.40
  -4  -1  -7  589.84   18.40
   4  -1   7  606.84   18.50
  -4  -1  -7  620.14   19.50
  -4   1  -7  605.44   18.60
   4   1   7  617.04   18.90
  -4   1  -7  630.74   19.80
  -4   1  -7  612.14   18.60
   4   1   7  590.14   18.70
  -4  -1  -5  101.99    4.40
   4  -1   5  105.79    3.30
   4  -1   5  101.29    3.70
  -4  -1  -5  103.79    3.40
  -4  -1  -5  104.29    3.40
   4  -1   5  101.29    3.30
   4   1   5  100.99    3.30
  -4   1  -5  103.79    3.20
  -4   1  -5  105.89    4.50
  -4   1  -5  103.89    3.30
   4   1   5   94.29    3.30
  -4   1  -5   97.49    3.50
  -4  -1  -3    5.60    0.70
   4  -1   3    4.50    1.20
   4  -1   3    6.30    0.50
  -4  -1  -3    5.30    0.90
  -4  -1  -3    6.50    0.50
  -4  -1  -3    4.80    1.50
   4  -1   3    6.10    0.60
  -4   1  -3    5.90    1.50
  -4   1  -3    6.60    0.50
   4   1   3    4.90    1.20
   4   1   3    5.40    0.70
   4   1   3    6.00    0.60
  -4   1  -3    6.00    0.90
   4  -1   1   43.10    1.40
  -4  -1  -1   43.20    1.50
  -4  -1  -1   41.80    2.20
   4  -1   1   42.90    2.20
  -4  -1  -1   44.00    1.60
   4   1   1   42.20    2.20
   4   1   1   41.70    1.60
  -4   1  -1   43.50    2.40
   4   1   1   41.90    1.50
  -4  -1   1   15.70    1.40
  -4  -1   1   17.30    0.70
   4  -1  -1   18.30    1.30
   4  -1  -1   17.30    0.70
  -4  -1   1   17.80    0.90
  -4  -1   1   19.20    1.30
  -4   1   1   15.40    1.20
   4   1  -1   14.90    1.40
   4   1  -1   17.30    0.90
   4   1  -1   16.70    0.80
  -4   1   1   18.00    1.40
  -4  -1   3   35.90    1.70
   4  -1  -3   36.10    1.70
   4  -1  -3   35.10    1.70
  -4  -1   3   35.10    1.80
  -4  -1   3   34.20    1.30
  -4  -1   3   34.60    1.20
   4   1  -3   34.80    1.80
   4   1  -3   34.40    1.40
  -4   1   3   36.30    1.70
   4   1  -3   34.30    1.70
  -4   1   3   34.20    1.70
   4   1  -3   34.30    1.30
   4  -1  -5   40.90    1.40
   4  -1  -5   41.50    1.40
   4  -1  -5   39.90    1.90
  -4  -1   5   42.20    1.50
  -4  -1   5   41.80    1.50
   4  -1  -5   41.20    1.80
  -4  -1   5   41.40    2.10
   4   1  -5   39.90    1.60
   4   1  -5   37.60    1.90
  -4   1   5   40.70    1.90
  -4   1   5   42.30    1.70
   4   1  -5   40.80    1.50
   4   1  -5   42.30    1.90
   4  -1  -7   87.19    3.00
  -4  -1   7   87.29    2.80
  -4  -1   7   85.99    2.80
   4  -1  -7   87.79    2.80
   4  -1  -7   84.39    2.80
   4  -1  -7   81.19    3.20
  -4   1   7   85.89    3.40
   4   1  -7   82.49    3.00
   4   1  -7   87.79    3.20
  -4   1   7   87.59    2.70
   4   1  -7   88.39    2.90
  -4  -1   9   12.80    1.70
  -4  -1   9   12.60    0.90
   4  -1  -9   11.10    0.80
   4  -1  -9   10.50    0.70
  -4  -1   9   11.40    0.80
   4   1  -9   10.70    1.00
  -4   1   9   13.60    0.70
  -4   1   9    9.90    0.70
  -4   1   9   12.80    1.60
  -4  -1  11    4.60    0.70
   4  -1 -11    3.40    0.70
  -4  -1  11    4.30    1.20
  -4  -1  11    2.80    0.70
  -4   1  11    3.50    0.80
  -4   1  11    3.60    0.60
  -4   1  11    4.50    0.70
   4   1 -11    3.60    0.90
   4  -1 -13    8.10    0.70
  -4  -1  13    7.60    0.70
  -4  -1  13    7.70    0.60
  -4  -1  13    7.60    1.20
  -4   1  13    7.40    0.60
   4   1 -13    7.40    1.00
  -4   1  13    6.80    0.60
  -4   1  13    8.20    1.10
  -4  -1  15  219.48    7.30
   4  -1 -15  224.98    7.00
  -4  -1  15  220.18    7.00
  -4   1  15  218.58    7.10
  -4   1  15  201.98    6.70
   4   1 -15  219.18    6.80
  -4   1  15  223.88    6.80
  -4  -1  17   79.69    3.20
   4  -1 -17   78.59    2.80
  -4  -1  17   78.79    2.80
  -4   1  17   78.89    2.80
   4   1 -17   81.39    2.90
   4   1 -17   79.79    2.80
  -4   1  17   79.39    3.10
  -4  -1  19   12.00    1.40
  -4  -1  19   12.40    0.90
   4  -1 -19   10.10    1.00
  -4   1  19   12.50    1.30
   4   1 -19   11.00    1.00
   4   1 -19    8.00    1.40
  -4   1  19   11.80    0.90
  -4  -1  21    1.20    0.70
  -4  -1  21    1.00    0.50
   4  -1 -21    1.60    0.60
   4   1 -21    1.10    0.70
  -4   1  21    0.50    0.50
  -4   1  21    1.10    0.70
  -4  -1  23    0.90    0.60
  -4  -1  23    0.20    0.80
   4  -1 -23    1.60    0.70
   4   1 -23    0.90    0.70
  -4   1  23    1.20    0.80
  -4   1  23    2.30    0.60
  -4  -1  25    9.30    1.40
  -4  -1  25    8.50    1.10
   4   1 -25    8.50    1.20
  -4   1  25    8.20    1.40
  -4   1  25    8.60    1.20
   4  -1 -27    1.90    0.90
  -4  -1  27    2.90    0.90
  -4   1  27    3.00    0.80
   4   1 -27    3.00    0.90
  -4  -1  29    8.00    1.60
   4  -1 -29    5.70    1.10
   4   1 -29    6.10    1.10
  -4   1  29    6.90    1.60
  -4  -2 -28   -1.00    1.20
   4  -2  28   -0.50    1.20
   4  -2  28   -0.30    0.90
  -4  -2 -28    0.10    2.50
   4   2  28   -1.80    1.00
  -4   2 -28    0.60    1.10
   4   2  28    2.40    1.20
  -4  -2 -26    2.00    2.30
   4  -2  26    2.70    0.80
  -4  -2 -26    1.20    1.00
   4  -2  26    1.30    1.10
  -4   2 -26    2.60    2.40
   4   2  26    3.30    1.10
   4  -2  24    1.10    1.00
  -4  -2 -24    1.60    2.10
   4  -2  24    2.90    0.80
  -4  -2 -24    1.80    0.90
   4   2  24    3.00    0.80
  -4   2 -24    2.30    0.80
   4   2  24    3.00    0.90
  -4   2 -24    4.60    2.40
  -4  -2 -22   51.79    2.40
   4  -2  22   49.00    2.60
  -4  -2 -22   50.29    4.00
  -4   2 -22   46.80    2.20
   4   2  22   48.60    2.30
  -4   2 -22   49.99    4.10
   4   2  22   50.49    2.60
   4  -2  20    1.00    0.60
   4  -2  20    1.60    0.80
  -4  -2 -20    2.40    1.70
   4   2  20    1.80    0.70
  -4   2 -20    1.90    0.70
  -4   2 -20    3.20    1.70
  -4  -2 -18   26.60    2.70
  -4  -2 -18   28.50    1.60
   4  -2  18   31.60    1.50
   4  -2  18   28.70    1.80
   4   2  18   29.40    1.80
  -4   2 -18   23.60    3.00
   4   2  18   27.80    1.50
  -4   2 -18   29.90    1.50
  -4  -2 -16   31.40    1.60
  -4  -2 -16   32.50    2.60
   4  -2  16   30.20    1.80
   4  -2  16   28.80    1.40
  -4   2 -16   33.10    2.80
   4   2  16   29.90    1.50
   4   2  16   28.80    1.70
  -4   2 -16   30.60    1.40
  -4  -2 -14   62.89    2.40
   4  -2  14   58.79    2.50
   4  -2  14   62.49    2.30
  -4  -2 -14   65.79    3.40
   4   2  14   61.39    2.40
  -4   2 -14   64.39    3.60
   4   2  14   61.79    2.60
  -4   2 -14   64.99    2.30
   4  -2  12  144.29    4.70
   4  -2  12  142.09    4.90
  -4  -2 -12  144.99    5.80
  -4  -2 -12  139.79    4.80
  -4   2 -12  126.39    4.50
  -4   2 -12  145.69    4.50
   4   2  12  138.49    4.80
   4   2  12  136.39    4.60
  -4   2 -12  142.19    5.80
   4  -2  10   50.19    2.10
   4  -2  10   47.20    1.90
  -4  -2 -10   46.20    2.80
  -4  -2 -10   50.19    2.00
   4   2  10   49.50    2.20
  -4   2 -10   44.80    1.80
  -4   2 -10   49.80    2.90
   4   2  10   48.50    2.00
  -4   2 -10   52.09    1.90
   4  -2   8  364.56   11.80
  -4  -2  -8  352.26   11.40
  -4  -2  -8  381.06   11.50
   4  -2   8  368.86   11.40
  -4  -2  -8  379.36   12.40
   4   2   8  364.16   11.80
  -4   2  -8  367.76   11.50
  -4   2  -8  388.66   11.50
   4   2   8  375.16   11.90
  -4   2  -8  377.96   12.70
  -4  -2  -6   15.00    2.30
   4  -2   6   16.70    0.90
   4  -2   6   14.70    1.50
   4  -2   6   16.20    0.80
  -4  -2  -6   14.60    1.00
  -4   2  -6   16.30    2.30
  -4   2  -6   16.70    0.90
   4   2   6   16.30    1.10
   4   2   6   12.80    1.60
  -4   2  -6   13.80    1.20
   4  -2   4   26.30    1.00
  -4  -2  -4   26.30    1.40
   4  -2   4   25.30    1.80
  -4  -2  -4   25.80    2.30
  -4  -2  -4   25.50    1.10
   4  -2   4   27.70    1.00
   4   2   4   25.50    1.20
  -4   2  -4   25.80    1.40
  -4   2  -4   26.90    1.00
  -4   2  -4   26.40    2.30
   4   2   4   23.90    1.20
  -4  -2  -2  178.08    5.70
   4  -2   2  183.28    5.50
  -4  -2  -2  179.78    6.30
  -4  -2  -2  185.08    5.70
   4  -2   2  178.88    6.20
   4   2   2  173.38    5.60
   4   2   2  184.58    5.60
  -4   2  -2  175.18    5.70
   4   2   2  169.28    6.20
  -4   2  -2  185.98    6.30
  -4  -2   0   10.50    0.70
  -4  -2   0   10.70    0.90
  -4  -2   0   11.60    1.30
   4  -2   0   10.30    1.00
   4   2   0   10.60    0.80
   4   2   0   10.40    0.70
   4   2   0   10.20    1.30
  -4   2   0   10.90    1.30
  -4  -2   2  406.56   13.10
   4  -2  -2  414.86   13.10
  -4  -2   2  429.96   12.90
  -4  -2   2  427.46   12.80
   4   2  -2  414.86   12.90
   4   2  -2  426.36   13.40
   4   2  -2  421.66   12.90
  -4   2   2  414.36   13.10
  -4   2   2  429.86   13.30
   4  -2  -4   47.50    2.20
  -4  -2   4   52.19    1.90
  -4  -2   4   51.19    1.80
  -4  -2   4   51.69    2.30
   4   2  -4   51.49    1.80
  -4   2   4   52.99    2.10
   4   2  -4   45.20    2.10
   4   2  -4   50.59    2.00
   4   2  -4   50.89    2.40
  -4   2   4   53.29    2.20
  -4  -2   6  234.68    7.30
   4  -2  -6  225.58    7.60
   4  -2  -6  243.88    7.20
  -4  -2   6  232.58    8.00
   4  -2  -6  241.38    7.20
   4   2  -6  243.28    7.70
   4   2  -6  241.98    7.50
  -4   2   6  241.78    7.70
  -4   2   6  241.98    7.80
   4  -2  -8  354.86   10.80
  -4  -2   8  364.06   11.30
   4  -2  -8  358.46   10.70
  -4  -2   8  338.77   11.00
  -4  -2   8  347.67   10.90
  -4   2   8  362.16   10.80
  -4   2   8  355.96   11.30
  -4   2   8  354.36   10.80
   4   2  -8  358.46   11.00
  -4  -2  10  440.26   13.80
  -4  -2  10  429.26   13.50
  -4  -2  10  452.65   13.60
   4  -2 -10  439.86   13.40
  -4   2  10  436.66   13.40
  -4   2  10  444.06   13.50
  -4   2  10  441.06   13.80
   4   2 -10  448.66   13.60
   4  -2 -12   10.50    0.80
  -4  -2  12   12.20    1.40
  -4  -2  12   12.80    0.70
  -4  -2  12   11.40    0.80
   4   2 -12   12.50    1.00
  -4   2  12   11.20    0.70
  -4   2  12   13.00    1.30
   4  -2 -14   46.20    1.80
  -4  -2  14   48.20    1.80
  -4  -2  14   49.20    2.20
  -4   2  14   51.89    1.80
   4   2 -14   51.19    1.90
  -4   2  14   46.10    1.80
  -4   2  14   49.50    2.20
  -4  -2  16   37.40    2.00
   4  -2 -16   37.40    1.60
  -4  -2  16   37.90    1.60
   4   2 -16   37.80    1.50
  -4   2  16   38.10    1.50
  -4   2  16   31.50    1.40
  -4   2  16   36.70    1.80
  -4  -2  18    5.00    0.70
   4  -2 -18    6.00    0.90
  -4  -2  18    7.10    1.30
  -4   2  18    4.60    1.10
   4   2 -18    5.80    0.90
  -4   2  18    6.30    0.70
  -4  -2  20    1.20    0.50
  -4  -2  20    1.10    0.70
   4  -2 -20    1.50    0.60
   4   2 -20    1.80    0.70
  -4   2  20    2.20    0.80
   4   2 -20    3.40    0.90
  -4   2  20    1.40    0.50
   4  -2 -22    3.40    0.70
  -4  -2  22    2.60    1.00
   4   2 -22    4.90    1.10
  -4   2  22    2.40    0.60
  -4  -2  24    1.40    0.80
  -4  -2  24    1.60    0.60
   4  -2 -24    0.90    0.70
  -4   2  24    0.30    0.80
  -4   2  24    0.90    0.70
  -4  -2  26    0.30    0.70
   4  -2 -26    0.40    0.90
  -4  -2  26    1.50    0.90
  -4   2  26    0.70    0.70
  -4   2  26   -0.40    0.80
  -4  -2  28    4.60    0.80
  -4  -2  28    3.10    1.00
   4  -2 -28    2.00    0.90
  -4   2  28    3.30    0.80
  -4   2  28    3.50    1.00
   4   2 -28    2.70    1.00
   4  -2 -30    5.40    1.10
  -4   2  30    3.10    1.00
  -4   2  30    3.90    1.00
   4   2 -30    5.30    1.20
  -4  -3 -27    0.60    1.20
  -4  -3 -27    1.90    2.30
   4  -3  27    0.00    1.20
   4  -3  27   -0.40    1.00
   4   3  27    0.40    0.90
  -4   3 -27   -2.30    2.90
  -4   3 -27    1.00    1.00
   4   3  27    0.50    1.20
   4  -3  25    0.10    0.80
   4  -3  25    0.00    1.00
  -4  -3 -25   -0.80    2.40
  -4   3 -25   -1.70    2.60
   4   3  25   -1.00    1.00
   4   3  25   -1.40    0.80
  -4   3 -25    1.30    0.80
   4  -3  23    1.30    0.90
  -4  -3 -23    0.30    1.00
  -4  -3 -23    2.30    1.90
   4  -3  23   -0.10    0.70
  -4   3 -23    4.00    2.30
  -4   3 -23   -0.40    0.70
   4   3  23    1.30    0.70
   4   3  23    1.00    0.90
  -4  -3 -21    3.00    1.70
   4  -3  21    4.90    1.00
  -4  -3 -21    2.60    0.90
   4   3  21    3.60    1.00
   4   3  21    1.30    0.70
  -4   3 -21    2.70    0.70
  -4   3 -21    5.10    1.90
   4  -3  19   10.40    1.40
  -4  -3 -19    8.80    1.30
  -4  -3 -19    8.70    2.70
   4  -3  19    9.30    1.10
   4   3  19    7.40    1.10
  -4   3 -19   10.00    1.00
   4   3  19    7.20    1.30
  -4   3 -19   14.60    3.10
  -4  -3 -17   13.70    1.30
   4  -3  17   13.20    1.00
   4  -3  17   14.80    1.40
  -4  -3 -17   16.30    2.50
   4   3  17   13.20    1.40
  -4   3 -17   12.50    1.10
  -4   3 -17   16.30    2.60
   4   3  17   12.40    1.10
   4  -3  15   10.80    0.90
  -4  -3 -15    7.40    1.90
  -4  -3 -15   11.10    1.10
   4  -3  15    8.60    1.20
  -4   3 -15   11.20    2.20
  -4   3 -15    9.60    0.90
   4   3  15   10.80    1.20
   4   3  15    9.10    1.00
  -4  -3 -13    6.20    0.90
  -4  -3 -13    4.90    1.10
   4  -3  13    5.20    0.70
   4  -3  13    5.50    1.00
  -4   3 -13    9.10    1.80
  -4   3 -13    7.20    0.70
   4   3  13    6.60    0.80
   4   3  13    7.00    1.00
  -4  -3 -11    5.30    0.90
   4  -3  11    5.90    0.90
  -4  -3 -11    5.50    1.50
  -4   3 -11    6.10    1.70
  -4   3 -11    4.90    0.60
   4   3  11    6.20    0.80
   4   3  11    6.90    1.00
  -4  -3  -9   -0.10    0.50
  -4  -3  -9    0.60    0.90
   4  -3   9    0.30    0.70
   4  -3   9    0.00    0.30
  -4   3  -9   -0.30    0.60
   4   3   9    0.20    0.40
  -4   3  -9   -0.30    0.50
   4   3   9    1.00    0.70
  -4   3  -9    0.60    0.90
  -4  -3  -7  173.58    5.50
  -4  -3  -7  171.78    6.40
   4  -3   7  171.68    5.70
  -4  -3  -7  163.38    5.40
   4  -3   7  166.88    5.40
  -4   3  -7  177.48    5.40
  -4   3  -7  163.58    5.40
  -4   3  -7  162.58    5.50
   4   3   7  178.18    5.90
  -4   3  -7  175.08    6.50
   4  -3   5   45.80    1.60
   4  -3   5   42.00    2.10
  -4  -3  -5   43.70    1.80
  -4  -3  -5   46.40    2.90
  -4  -3  -5   46.60    2.10
   4  -3   5   48.00    1.70
  -4   3  -5   45.20    2.90
   4   3   5   44.80    1.90
  -4   3  -5   44.30    1.90
  -4   3  -5   46.60    1.60
  -4  -3  -3  316.17   10.00
  -4  -3  -3  328.07   10.10
   4  -3   3  323.67    9.90
  -4  -3  -3  318.27   11.30
   4  -3   3  337.57    9.90
  -4   3  -3  327.27   10.90
   4   3   3  331.67   10.20
  -4   3  -3  325.17   10.20
  -4  -3  -1   22.40    1.40
  -4  -3  -1   22.70    1.10
   4   3   1   22.70    1.10
   4   3   1   22.10    1.10
  -4   3  -1   22.40    1.70
   4   3   1   21.30    1.60
  -4  -3   1   82.59    2.80
  -4  -3   1   85.59    2.90
  -4  -3   1   81.29    3.20
   4   3  -1   83.49    2.80
   4   3  -1   82.49    2.90
   4   3  -1   81.79    3.40
  -4   3   1   83.69    3.00
  -4   3   1   85.39    3.30
   4  -3  -3   24.30    1.40
  -4  -3   3   23.00    1.40
  -4  -3   3   22.80    1.10
  -4  -3   3   24.20    1.90
   4   3  -3   23.90    1.20
   4   3  -3   23.00    1.10
   4   3  -3   22.80    1.80
  -4   3   3   23.80    1.40
  -4   3   3   23.50    1.40
  -4  -3   5  167.88    6.20
   4  -3  -5  168.38    5.70
  -4  -3   5  174.18    5.60
   4  -3  -5  176.28    5.20
  -4  -3   5  166.68    5.40
  -4   3   5  174.08    5.70
  -4   3   5  171.78    5.70
   4   3  -5  171.38    5.50
   4  -3  -7  772.72   23.90
  -4  -3   7  764.32   23.90
   4  -3  -7  775.22   23.60
  -4  -3   7  768.22   23.70
  -4  -3   7  820.32   24.10
   4  -3  -7  784.72   23.60
  -4   3   7  812.72   24.50
  -4   3   7  790.82   24.40
   4   3  -7  796.72   24.30
  -4  -3   9 1000.00   30.50
  -4  -3   9  982.10   30.20
   4  -3  -9  976.40   30.10
   4  -3  -9  990.80   30.10
  -4  -3   9 1034.00   30.30
  -4   3   9  995.10   29.90
   4   3  -9  976.30   30.10
  -4   3   9 1007.90   29.90
  -4  -3  11  179.68    6.10
   4  -3 -11  183.78    5.70
  -4  -3  11  181.28    5.80
  -4   3  11  178.28    5.70
  -4   3  11  184.48    5.70
   4   3 -11  183.28    5.90
  -4   3  11  187.38    6.10
  -4  -3  13   44.40    1.70
  -4  -3  13   41.20    2.10
   4  -3 -13   43.40    1.60
  -4   3  13   42.10    1.50
   4   3 -13   44.80    1.70
  -4   3  13   44.70    1.60
  -4   3  13   43.60    1.90
  -4  -3  15    4.40    1.20
  -4  -3  15    4.60    0.60
  -4   3  15    4.30    0.60
   4   3 -15    4.40    0.80
  -4   3  15    3.70    0.60
  -4   3  15    4.00    1.00
  -4  -3  17    1.10    0.40
   4  -3 -17    0.60    0.40
  -4  -3  17   -0.30    0.60
  -4   3  17   -0.10    0.40
   4   3 -17    0.40    0.60
  -4   3  17   -0.10    0.60
  -4   3  17   -0.20    0.40
  -4  -3  19   34.40    1.60
   4  -3 -19   36.40    1.60
  -4  -3  19   33.40    2.00
   4   3 -19   34.20    1.70
  -4   3  19   36.30    1.90
  -4   3  19   36.00    1.50
  -4  -3  21   30.40    1.40
   4  -3 -21   24.40    1.50
  -4   3  21   29.00    1.40
   4   3 -21   30.30    1.70
   4   3 -21   29.90    2.40
  -4   3  21   31.10    1.80
  -4  -3  23    4.40    1.10
  -4  -3  23    5.40    1.50
   4  -3 -23    4.80    0.80
  -4   3  23    6.20    1.30
  -4   3  23    6.20    1.00
  -4  -3  25    0.70    0.70
  -4  -3  25    0.10    0.70
   4  -3 -25   -0.50    0.90
   4   3 -25    0.50    0.80
  -4   3  25    0.10    0.80
  -4   3  25    0.20    0.70
  -4  -3  27    1.90    0.80
   4  -3 -27   -0.70    0.90
  -4  -3  27    0.80    0.90
  -4   3  27    2.10    0.80
   4   3 -27    1.50    0.90
  -4   3  27    1.50    0.90
  -4  -3  29   22.90    1.80
  -4  -3  29   23.20    2.10
   4  -3 -29   20.90    1.90
  -4   3  29   24.60    2.00
   4   3 -29   19.20    1.70
  -4   3  29   20.80    1.80
  -4  -4 -28   23.30    2.30
   4  -4  28   31.30    2.80
   4   4  28   27.70    2.00
  -4   4 -28   25.40    1.80
  -4   4 -28   34.30    5.30
   4   4  28   19.10    2.40
   4  -4  26    2.40    1.10
  -4  -4 -26    4.80    2.20
  -4  -4 -26    4.60    1.30
   4  -4  26    3.00    1.00
   4   4  26    3.00    1.10
  -4   4 -26   -1.50    2.90
  -4   4 -26    1.70    0.90
   4   4  26    2.90    1.00
  -4  -4 -24    1.00    1.10
   4  -4  24    3.00    1.00
   4  -4  24    1.30    0.80
  -4   4 -24    0.20    0.80
   4   4  24    1.30    1.00
   4   4  24    0.70    0.80
  -4   4 -24    5.50    2.60
  -4  -4 -22    3.40    1.80
  -4  -4 -22    1.20    1.00
   4  -4  22    3.60    0.90
   4   4  22    2.40    0.80
  -4   4 -22    1.30    2.30
   4   4  22    2.10    0.90
  -4   4 -22    2.20    0.80
  -4  -4 -20   41.40    2.20
   4  -4  20   43.30    2.00
  -4  -4 -20   41.40    3.40
   4  -4  20   43.70    2.20
  -4   4 -20   49.00    4.10
   4   4  20   43.30    2.40
   4   4  20   45.30    2.40
   4  -4  18   33.70    1.60
   4  -4  18   32.30    1.90
  -4  -4 -18   33.40    2.70
  -4  -4 -18   28.40    1.90
  -4   4 -18   33.00    1.60
   4   4  18   32.50    1.70
  -4   4 -18   35.50    3.20
   4   4  18   31.20    2.00
   4  -4  16   45.80    1.90
   4  -4  16   43.80    2.10
  -4  -4 -16   40.70    2.00
  -4  -4 -16   43.60    3.10
  -4   4 -16   42.30    1.70
   4   4  16   42.10    1.90
   4   4  16   43.30    2.20
  -4   4 -16   42.40    3.20
  -4  -4 -14    0.70    0.70
  -4  -4 -14    0.20    1.10
   4  -4  14    0.30    0.50
   4  -4  14    1.00    0.50
  -4   4 -14    1.50    1.10
  -4   4 -14    0.90    0.40
   4   4  14    0.90    0.50
   4   4  14    0.40    0.60
  -4  -4 -12   35.40    2.50
  -4  -4 -12   37.00    1.70
   4  -4  12   36.50    1.70
   4  -4  12   37.20    1.60
  -4   4 -12   39.10    1.40
  -4   4 -12   39.90    2.60
   4   4  12   37.10    1.90
   4   4  12   37.20    1.60
  -4   4 -12   30.70    1.70
   4  -4  10    1.40    0.60
  -4  -4 -10    1.60    0.90
   4  -4  10    1.70    0.40
  -4   4 -10    1.50    0.90
  -4   4 -10    2.60    0.50
   4   4  10    3.70    1.00
   4   4  10    2.30    0.40
  -4   4 -10    2.00    0.60
  -4  -4  -8   51.49    2.80
  -4  -4  -8   52.29    2.20
   4  -4   8   51.09    2.30
   4  -4   8   53.89    1.90
  -4   4  -8   52.39    2.10
  -4   4  -8   55.49    2.90
   4   4   8   54.99    2.40
   4   4   8   54.09    2.10
  -4  -4  -6  225.88    8.00
   4  -4   6  229.88    7.30
  -4  -4  -6  224.08    7.30
   4  -4   6  232.18    7.10
  -4   4  -6  232.98    7.10
  -4   4  -6  231.18    7.20
  -4   4  -6  224.78    7.30
   4   4   6  239.48    7.40
  -4   4  -6  228.38    8.10
   4  -4   4  133.29    4.10
  -4  -4  -4  135.09    4.50
  -4  -4  -4  130.19    4.30
  -4   4  -4  134.39    4.40
  -4   4  -4  136.59    5.20
  -4  -4  -2  163.88    5.30
   4  -4   2  164.18    4.90
   4  -4   2  145.89    5.00
  -4  -4  -2  163.68    5.20
   4   4   2  162.68    5.30
  -4   4  -2  163.18    6.00
  -4   4  -2  161.48    5.20
  -4  -4   0   16.20    1.10
  -4   4   0   16.90    1.50
   4   4   0   16.40    1.10
  -4   4   0   13.40    1.20
  -4  -4   2  102.99    4.00
  -4  -4   2  101.39    3.40
   4   4  -2  102.09    3.50
  -4   4   2  101.69    3.80
  -4   4   2  103.79    3.60
   4  -4  -4    0.80    0.80
  -4  -4   4    0.60    0.50
  -4  -4   4    0.50    0.80
   4   4  -4   -0.20    0.70
  -4   4   4    0.90    0.70
  -4   4   4    1.30    0.50
  -4  -4   6  135.39    4.90
  -4  -4   6  127.19    4.40
   4  -4  -6  128.99    4.60
   4  -4  -6  142.29    4.20
  -4  -4   6  141.79    4.60
   4  -4  -6  131.69    4.20
  -4   4   6  137.39    4.50
  -4   4   6  133.09    4.50
   4   4  -6  130.99    4.50
  -4  -4   8    1.30    0.90
  -4  -4   8    0.80    0.60
   4  -4  -8    1.20    0.40
  -4  -4   8    1.30    0.50
   4  -4  -8    1.00    0.40
  -4   4   8    1.30    0.40
   4   4  -8    1.00    0.70
  -4   4   8    1.50    0.70
  -4  -4  10  131.89    4.30
   4  -4 -10  131.79    4.10
  -4  -4  10  129.89    4.70
   4   4 -10  128.19    4.20
  -4   4  10  134.99    4.50
  -4   4  10  121.79    4.10
  -4   4  10  131.89    4.00
  -4  -4  12    1.10    0.70
   4  -4 -12    0.00    0.30
  -4  -4  12    0.80    0.40
   4   4 -12    0.20    0.50
  -4   4  12    0.20    0.30
  -4   4  12    0.50    0.30
  -4   4  12    0.30    0.50
  -4  -4  14   30.20    1.40
   4  -4 -14   33.20    1.40
  -4  -4  14   33.10    1.80
  -4   4  14   31.40    1.20
   4   4 -14   33.10    1.50
  -4   4  14   30.70    1.60
  -4   4  14   33.20    1.30
  -4  -4  16    1.90    0.80
   4  -4 -16    2.00    0.60
  -4  -4  16    2.00    0.40
  -4   4  16    2.40    0.60
  -4   4  16    2.70    0.50
  -4   4  16    2.20    0.60
   4   4 -16    1.40    0.60
   4  -4 -18   10.60    0.90
  -4  -4  18   10.90    0.90
  -4  -4  18    8.30    1.40
  -4   4  18   10.60    0.80
   4   4 -18   10.10    1.10
  -4   4  18   10.10    1.20
   4  -4 -20   23.20    1.40
  -4  -4  20   23.60    1.80
  -4  -4  20   24.50    1.40
  -4   4  20   25.30    1.60
   4   4 -20   26.10    1.60
  -4   4  20   26.80    1.30
   4  -4 -22   -0.50    0.60
  -4  -4  22    0.30    0.60
  -4  -4  22   -0.30    0.80
  -4   4  22    0.20    0.60
   4  -4 -24   13.30    1.30
  -4  -4  24   11.40    1.20
  -4  -4  24   13.10    1.60
   4   4 -24    9.90    1.30
  -4   4  24    9.80    1.40
   4  -4 -26   -0.20    0.90
  -4  -4  26    0.10    0.90
  -4  -4  26   -0.20    0.70
  -4   4  26    1.20    0.80
   4   4 -26   -0.10    0.80
  -4   4  26    0.30    0.80
  -4  -4  28    4.30    1.10
  -4  -4  28    7.80    1.60
  -4   4  28    6.30    1.50
  -4   4  28    7.30    1.70
   4   4 -28    3.90    1.00
   4  -5  27   10.50    1.70
  -4  -5 -27   14.80    2.00
   4  -5  27   14.20    2.20
  -4   5 -27    9.90    3.40
   4   5  27    9.40    1.70
  -4   5 -27    8.90    1.50
   4  -5  25   13.00    1.60
  -4  -5 -25   12.50    2.00
   4  -5  25   14.70    1.90
  -4   5 -25    9.00    1.30
   4   5  25   10.30    1.60
   4   5  25   10.50    2.00
  -4   5 -25    7.10    2.90
   4  -5  23   14.40    1.80
  -4  -5 -23   12.70    1.60
   4  -5  23   11.90    1.40
  -4  -5 -23    9.40    2.40
  -4   5 -23   12.70    3.90
   4   5  23   13.50    1.50
  -4   5 -23   11.90    1.20
   4   5  23   11.00    1.80
   4  -5  21   -0.10    0.70
  -4  -5 -21    0.10    1.00
  -4  -5 -21   -0.10    1.60
   4   5  21   -0.10    0.90
   4   5  21    0.10    0.70
  -4   5 -21   -0.20    2.00
  -4   5 -21    1.00    0.60
   4  -5  19   54.29    2.20
  -4  -5 -19   49.20    2.50
  -4  -5 -19   50.39    3.40
   4  -5  19   51.59    2.50
   4   5  19   48.30    2.60
  -4   5 -19   57.89    3.90
  -4   5 -19   53.49    2.10
  -4  -5 -17   22.60    1.80
   4  -5  17   28.50    1.50
   4  -5  17   27.10    1.70
  -4  -5 -17   28.30    2.50
  -4   5 -17   26.50    2.90
   4   5  17   25.20    1.50
   4   5  17   26.80    1.90
  -4   5 -17   25.10    1.30
   4  -5  15    7.60    1.20
   4  -5  15    8.20    0.80
  -4  -5 -15    4.70    1.30
  -4  -5 -15    5.40    1.10
   4   5  15    6.50    0.90
  -4   5 -15    3.90    1.30
  -4   5 -15    6.30    0.80
   4   5  15    5.50    1.30
  -4  -5 -13    0.70    0.70
   4  -5  13    1.00    0.50
  -4  -5 -13    2.00    1.10
   4  -5  13    0.60    0.40
  -4   5 -13    0.60    0.40
   4   5  13    0.80    0.50
  -4   5 -13    1.30    0.90
   4   5  13    1.10    0.70
  -4   5 -13    1.00    1.10
  -4  -5 -11  106.49    4.50
   4  -5  11  107.89    3.80
   4  -5  11  107.19    3.70
  -4  -5 -11  108.79    3.80
   4   5  11  105.49    3.90
   4   5  11  105.09    3.60
  -4   5 -11  105.69    4.50
  -4   5 -11   92.79    3.60
  -4   5 -11  108.59    3.40
   4  -5   9   57.49    3.10
   4  -5   9   60.19    2.20
  -4  -5  -9   60.29    2.40
   4   5   9   61.59    2.50
   4   5   9   60.49    2.30
  -4   5  -9   58.59    3.00
  -4   5  -9   56.09    2.20
  -4   5  -9   62.19    2.10
   4  -5   7    6.10    1.00
  -4  -5  -7    7.00    1.00
   4  -5   7    6.50    0.60
  -4   5  -7    7.10    0.60
  -4   5  -7    6.80    0.80
  -4   5  -7    8.00    1.40
   4   5   7    7.10    0.80
  -4  -5  -5  247.98    7.90
   4  -5   5  244.08    7.70
  -4   5  -5  247.78    8.50
  -4   5  -5  239.78    7.70
  -4   5  -5  250.67    7.50
   4   5   5  247.18    7.80
   4  -5   3  115.59    3.80
   4  -5   3  113.99    3.60
  -4  -5  -3  120.29    4.10
  -4   5  -3  115.89    3.80
   4   5   3  122.09    4.10
   4  -5   1   26.10    1.10
  -4  -5  -1   26.90    1.70
   4  -5   1   25.30    1.00
  -4   5  -1   24.10    1.20
  -4   5  -1   27.60    1.30
   4   5   1   25.40    1.40
   4  -5  -1   16.90    0.70
  -4  -5   1   18.40    1.40
  -4   5   1   18.60    1.20
   4   5  -1   15.30    1.50
  -4  -5   3  128.69    4.30
   4  -5  -3  116.79    3.80
   4   5  -3  119.49    4.10
  -4   5   3  122.29    4.00
   4  -5  -5  197.38    6.00
   4  -5  -5  183.68    6.30
  -4  -5   5  198.68    6.70
  -4  -5   5  201.78    6.40
   4  -5  -5  189.68    6.00
  -4   5   5  195.98    6.30
   4   5  -5  199.08    6.40
   4  -5  -7   24.40    1.10
  -4  -5   7   25.80    1.50
  -4  -5   7   26.20    1.80
   4  -5  -7   26.90    1.00
   4  -5  -7   27.00    1.60
  -4   5   7   28.70    1.40
   4   5  -7   25.20    1.30
   4  -5  -9   10.80    0.70
  -4  -5   9   12.20    1.30
  -4  -5   9    9.30    1.10
   4   5  -9   11.90    0.90
  -4   5   9   13.90    1.30
   4  -5 -11    0.60    0.30
  -4  -5  11    0.80    0.70
  -4   5  11    1.60    0.60
   4   5 -11    0.70    0.50
  -4   5  11    0.80    0.30
  -4  -5  13   21.50    1.10
   4  -5 -13   18.20    1.00
  -4  -5  13   20.30    1.50
  -4   5  13   19.10    1.10
   4   5 -13   18.50    1.10
  -4   5  13   15.50    1.00
  -4   5  13   17.40    0.80
  -4  -5  15    8.90    0.80
  -4  -5  15    9.00    1.30
  -4   5  15    7.50    0.60
  -4   5  15    6.70    0.60
   4   5 -15    8.90    0.90
  -4  -5  17    2.90    0.50
  -4  -5  17    3.70    0.90
   4  -5 -17    3.40    0.80
  -4   5  17    1.50    0.40
   4   5 -17    3.00    0.70
  -4   5  17    2.10    0.60
   4  -5 -19   98.09    3.40
  -4  -5  19   97.79    3.80
  -4  -5  19   95.99    3.50
   4   5 -19   99.49    3.60
  -4   5  19   98.19    3.40
  -4   5  19   98.29    3.70
   4  -5 -21   -0.50    0.60
  -4  -5  21    0.30    0.60
  -4   5  21    0.60    0.60
  -4   5  21    0.30    0.70
  -4  -5  23   30.40    1.70
   4  -5 -23   33.50    1.80
  -4  -5  23   32.10    2.00
  -4   5  23   34.70    1.70
  -4   5  23   31.70    1.90
   4   5 -23   33.50    1.80
  -4  -5  25    5.20    1.50
  -4  -5  25    5.50    1.30
   4   5 -25    5.00    0.90
  -4   5  25    8.20    1.40
  -4   5  25    7.20    1.30
   4  -5 -27    0.90    1.00
  -4  -5  27    2.00    0.80
  -4  -5  27    1.20    1.00
  -4   5  27    0.60    0.90
   4   5 -27    1.70    1.00
  -4   5  27    1.20    0.90
   4  -6  26    4.20    1.20
  -4  -6 -26    1.60    1.40
   4  -6  26    6.20    1.00
  -4   6 -26    4.60    2.90
   4   6  26    5.70    1.10
   4   6  26    4.20    1.30
  -4   6 -26    2.80    1.00
  -4  -6 -24   18.80    2.20
   4  -6  24   20.70    2.00
   4  -6  24   17.30    1.60
  -4   6 -24   18.50    1.50
   4   6  24   19.70    1.80
  -4   6 -24   20.90    4.70
   4  -6  22   14.90    1.40
   4  -6  22   12.50    1.80
  -4   6 -22   12.10    1.20
   4   6  22    9.90    1.80
  -4   6 -22   16.30    3.60
   4   6  22   12.40    1.50
   4  -6  20    3.50    0.70
   4  -6  20    3.70    0.90
  -4  -6 -20    3.60    1.10
  -4   6 -20    3.90    1.90
  -4   6 -20    3.10    0.70
   4   6  20    2.10    0.80
   4   6  20    2.20    1.00
  -4  -6 -18   20.50    1.70
   4  -6  18   20.50    1.40
   4  -6  18   23.50    1.60
  -4   6 -18   22.40    3.30
   4   6  18   19.80    2.10
   4   6  18   17.40    1.60
  -4   6 -18   19.70    1.20
  -4  -6 -16  175.08    6.20
   4  -6  16  181.88    6.00
   4  -6  16  183.58    6.10
   4   6  16  174.98    6.20
  -4   6 -16  178.88    7.40
  -4   6 -16  180.88    5.80
   4   6  16  176.28    6.00
   4  -6  14   11.50    0.90
  -4  -6 -14   10.90    1.30
   4  -6  14   11.30    1.10
  -4   6 -14   11.10    0.90
  -4   6 -14   10.50    2.40
   4   6  14   11.80    1.10
   4   6  14   12.60    1.40
  -4  -6 -12   10.00    1.10
   4  -6  12    8.00    0.80
   4  -6  12   10.50    1.00
  -4   6 -12   11.70    2.00
   4   6  12   10.10    0.90
   4   6  12    8.20    1.20
  -4   6 -12    9.10    0.70
  -4   6 -12    9.70    1.20
  -4  -6 -10   11.40    1.20
   4  -6  10   14.00    1.60
   4   6  10   13.70    1.30
  -4   6 -10   11.30    1.90
  -4   6 -10   10.80    1.10
  -4   6 -10   12.80    0.70
   4   6  10   13.80    1.00
   4  -6   8   41.90    1.90
   4  -6   8   42.70    1.60
  -4  -6  -8   42.10    1.90
  -4   6  -8   46.60    2.60
  -4   6  -8   44.30    1.60
   4   6   8   42.50    1.80
  -4   6  -8   42.80    1.80
   4  -6   6  149.88    4.90
   4  -6   6  151.58    4.90
  -4  -6  -6  151.88    5.10
   4   6   6  154.48    5.10
  -4   6  -6  156.48    4.70
  -4   6  -6  148.19    4.80
  -4   6  -6  151.78    4.80
  -4  -6  -4   56.69    2.40
   4  -6   4   57.59    2.10
  -4   6  -4   57.69    2.00
   4   6   4   59.09    2.20
  -4  -6  -2  288.37    8.90
   4  -6   2  264.97    8.50
   4  -6   2  284.07    8.70
  -4   6  -2  290.87    8.80
   4   6   2  284.87    9.10
  -4  -6   0    6.60    1.60
   4  -6   0    6.10    0.60
  -4  -6   0    6.30    1.10
   4  -6   0    6.70    0.70
   4   6   0    5.00    0.80
  -4   6   0    5.00    0.70
  -4   6   0    4.20    0.80
   4  -6  -2   83.69    2.80
  -4  -6   2   88.09    3.20
  -4  -6   2   87.69    3.60
   4  -6  -2   85.79    2.80
   4   6  -2   88.59    3.10
  -4   6   2   89.89    3.00
   4  -6  -4   25.70    1.10
  -4  -6   4   27.90    1.90
   4  -6  -4   27.80    1.10
   4  -6  -4   28.00    1.40
  -4  -6   4   26.30    1.50
  -4   6   4   26.40    1.30
   4   6  -4   30.10    1.40
   4  -6  -6  338.47   10.00
   4  -6  -6  312.87   10.00
  -4  -6   6  330.07   10.40
   4  -6  -6  317.57   10.30
  -4  -6   6  339.47   10.60
   4   6  -6  336.77   10.50
  -4   6   6  335.07   10.40
  -4  -6   8  183.38    6.20
  -4  -6   8  185.98    6.10
   4  -6  -8  189.18    5.70
   4  -6  -8  175.68    6.00
  -4   6   8  184.58    5.90
   4   6  -8  183.78    6.00
  -4  -6  10   78.49    3.10
  -4  -6  10   82.99    3.20
   4  -6 -10   77.89    2.70
   4   6 -10   79.09    2.80
  -4  -6  12   48.60    2.30
   4  -6 -12   49.00    1.80
   4   6 -12   48.90    1.90
  -4   6  12   48.80    2.00
  -4  -6  14    0.00    0.50
   4  -6 -14    0.50    0.60
  -4   6  14    0.00    0.30
  -4   6  14    0.70    0.50
  -4   6  14    0.20    0.30
   4   6 -14    0.50    0.60
  -4   6  14    0.30    0.50
  -4  -6  16    7.80    0.90
   4  -6 -16    7.80    0.90
  -4  -6  16    8.60    1.40
  -4   6  16    8.20    0.80
   4   6 -16    9.10    1.10
  -4   6  16    8.30    1.00
  -4  -6  18    5.40    0.90
   4  -6 -18    3.30    0.60
  -4   6  18    4.20    0.70
   4   6 -18    5.40    1.10
  -4   6  18    4.10    1.10
   4  -6 -20   29.60    1.60
  -4  -6  20   30.20    1.60
  -4   6  20   29.00    1.40
  -4   6  20   29.70    1.70
  -4  -6  22    8.20    1.40
  -4  -6  22    7.50    1.10
   4  -6 -22    5.20    1.20
   4   6 -22    7.00    1.30
  -4   6  22    6.60    1.10
  -4  -6  24    2.90    0.80
   4  -6 -24    1.70    0.90
  -4  -6  24    3.00    0.90
  -4   6  24    1.10    0.80
   4   6 -24    2.10    0.90
  -4   6  24    1.30    0.70
   4  -6 -26   -0.70    1.00
  -4  -6  26    0.50    1.00
  -4  -6  26    0.40    0.80
  -4   6  26    0.90    0.90
   4   6 -26    0.10    0.90
  -4   6  26    2.30    0.80
  -4  -6  28    2.10    1.10
  -4  -6  28   -0.70    0.90
  -4   6  28    2.00    1.00
  -4   6  28    1.10    1.00
   4   6 -28   -0.10    1.00
  -4  -7 -25    6.40    1.50
   4  -7  25    6.40    1.50
   4  -7  25    4.40    1.30
  -4   7 -25    3.10    2.80
   4   7  25    4.10    1.30
  -4   7 -25    3.20    0.90
   4  -7  23    7.20    1.50
   4  -7  23    9.40    1.80
  -4  -7 -23    8.30    1.80
  -4   7 -23    2.80    2.70
   4   7  23    7.40    1.90
   4   7  23    9.50    1.60
  -4   7 -23    6.80    1.20
   4  -7  21    1.70    0.90
  -4  -7 -21    3.30    1.10
   4   7  21    1.50    0.80
  -4   7 -21    1.20    2.10
  -4   7 -21    1.50    0.70
  -4  -7 -19   10.00    1.60
   4  -7  19    9.10    1.50
   4  -7  19   11.10    1.20
   4   7  19    9.40    1.60
  -4   7 -19    7.30    2.20
  -4   7 -19    8.10    1.00
   4   7  19    8.80    1.30
   4  -7  17   19.10    1.50
  -4  -7 -17   19.20    1.60
   4  -7  17   20.70    1.30
   4   7  17   20.40    1.80
   4   7  17   18.00    1.40
  -4   7 -17   19.60    1.20
   4  -7  15   94.89    3.40
   4  -7  15   88.29    3.40
  -4  -7 -15   93.09    3.60
  -4   7 -15   94.79    3.20
   4   7  15   90.49    3.70
   4   7  15   90.49    3.50
  -4   7 -15   88.99    4.60
  -4  -7 -13   12.70    1.40
   4  -7  13   14.30    1.20
   4  -7  13   12.70    1.00
  -4   7 -13   14.10    0.90
   4   7  13   14.80    1.20
  -4   7 -13   15.00    2.10
   4   7  13   13.90    1.60
   4  -7  11   10.10    0.80
  -4  -7 -11   10.50    1.30
   4  -7  11   13.40    1.20
   4   7  11   10.30    1.10
  -4   7 -11   12.20    1.80
   4   7  11   10.40    1.40
  -4   7 -11    9.80    0.70
  -4   7 -11   10.80    1.20
  -4  -7  -9    0.20    0.70
   4  -7   9    0.30    0.60
  -4   7  -9   -0.40    0.60
   4   7   9    0.30    0.50
  -4   7  -9    0.10    0.30
  -4  -7  -7   84.09    3.20
   4  -7   7   86.89    3.00
   4  -7   7   85.39    3.10
  -4   7  -7   84.79    2.70
  -4   7  -7   81.49    2.80
   4   7   7   84.89    3.00
  -4   7  -7   79.89    2.80
   4  -7   5  209.48    6.80
  -4  -7  -5  214.18    7.00
  -4   7  -5  211.88    6.80
  -4   7  -5  221.38    6.70
   4   7   5  221.88    7.10
  -4  -7  -3   15.10    1.20
   4  -7   3   15.70    1.00
  -4   7  -3   15.50    0.70
   4   7   3   14.50    1.10
   4  -7   1   43.20    1.70
  -4  -7  -1   50.39    2.30
  -4  -7  -1   44.40    2.10
   4   7   1   43.20    1.80
  -4  -7   1    6.90    1.60
  -4  -7   1    6.00    1.00
   4  -7  -1    5.60    0.70
   4   7  -1    6.10    0.80
  -4  -7   3   22.20    1.40
  -4  -7   3   21.10    1.80
   4  -7  -3   20.70    1.00
  -4   7   3   21.10    1.00
   4   7  -3   21.80    1.20
  -4  -7   5   56.89    2.50
  -4  -7   5   51.19    2.30
   4  -7  -5   55.89    1.90
   4  -7  -5   53.39    2.10
   4   7  -5   53.19    2.10
  -4   7   5   54.19    1.90
   4  -7  -7   14.80    0.90
  -4  -7   7   14.60    1.40
   4  -7  -7   13.50    1.20
  -4  -7   7   16.00    1.30
  -4   7   7   16.60    0.90
   4   7  -7   14.50    1.00
   4  -7  -9  128.29    4.10
   4  -7  -9  115.29    4.30
  -4  -7   9  131.79    4.50
  -4  -7   9  127.39    4.50
   4   7  -9  128.99    4.30
  -4   7   9  130.59    4.30
  -4  -7  11   71.69    2.90
  -4  -7  11   70.89    2.90
   4  -7 -11   67.99    2.50
  -4   7  11   70.19    2.30
   4   7 -11   72.29    2.70
  -4   7  11   72.79    2.60
  -4  -7  13   31.10    1.90
   4  -7 -13   33.20    1.60
  -4   7  13   32.20    1.20
  -4   7  13   29.20    1.10
   4   7 -13   32.00    1.60
  -4   7  13   31.10    1.50
  -4  -7  15    4.50    0.90
  -4  -7  15    2.90    0.90
   4  -7 -15    3.70    0.90
   4   7 -15    1.80    0.60
  -4   7  15    2.50    0.50
  -4  -7  17   35.40    2.00
  -4  -7  17   32.00    1.80
   4  -7 -17   32.40    1.60
  -4   7  17   31.60    1.40
   4   7 -17   31.90    1.60
  -4   7  17   32.80    1.70
  -4  -7  19  119.19    4.40
   4  -7 -19  122.89    4.20
  -4  -7  19  125.99    4.60
  -4   7  19  122.49    4.00
  -4   7  19  124.19    4.30
   4   7 -19  115.69    4.30
   4  -7 -21   68.39    2.70
  -4  -7  21   69.69    2.80
  -4  -7  21   69.19    3.10
  -4   7  21   71.19    2.80
   4   7 -21   69.29    2.80
  -4   7  21   66.79    2.60
   4  -7 -23   45.10    2.20
  -4  -7  23   41.90    2.10
  -4  -7  23   46.40    2.50
  -4   7  23   42.90    2.20
   4   7 -23   41.90    2.00
  -4  -7  25    0.20    0.90
  -4  -7  25    1.00    0.80
  -4   7  25   -0.10    0.80
  -4   7  25    1.10    0.90
   4   7 -25    1.50    1.00
   4  -7 -27    0.80    1.20
  -4  -7  27    0.90    1.10
  -4   7  27    2.00    1.10
   4   7 -27    2.90    1.00
  -4   7  27    2.20    1.00
   4  -8  24   -0.60    1.20
  -4  -8 -24   -1.10    1.30
   4  -8  24    0.70    1.00
  -4   8 -24    1.30    0.90
   4   8  24    0.60    1.40
   4   8  24    2.30    1.10
  -4   8 -24    3.20    3.10
  -4  -8 -22    0.70    1.20
   4  -8  22    2.50    1.00
   4  -8  22    0.10    0.90
   4   8  22    0.10    1.10
  -4   8 -22    2.40    2.30
  -4   8 -22    0.10    0.70
   4   8  22   -1.30    0.90
   4  -8  20    3.30    1.00
  -4  -8 -20    2.30    1.00
  -4   8 -20    1.30    0.70
   4   8  20    2.30    1.00
  -4   8 -20    0.70    2.30
   4   8  20    2.10    0.90
   4  -8  18   32.10    1.70
  -4  -8 -18   31.70    2.10
   4  -8  18   30.90    1.80
   4   8  18   29.30    2.30
   4   8  18   29.30    1.80
  -4   8 -18   31.40    3.30
   4  -8  16  109.29    3.80
   4  -8  16  105.09    3.90
  -4  -8 -16  104.79    4.20
  -4   8 -16  102.89    5.20
   4   8  16  110.39    4.30
  -4   8 -16  114.19    3.70
   4   8  16  107.19    4.00
   4  -8  14    0.30    0.60
   4  -8  14    1.20    0.50
  -4  -8 -14    0.70    0.90
  -4   8 -14   -0.30    0.50
  -4   8 -14    0.90    1.30
   4   8  14    0.50    0.90
   4   8  14    1.50    0.80
   4  -8  12  204.28    6.60
   4  -8  12  199.38    6.60
  -4  -8 -12  204.78    6.90
  -4   8 -12  197.68    7.80
  -4   8 -12  211.88    6.40
   4   8  12  201.78    6.80
   4   8  12  198.78    6.90
  -4  -8 -10   32.30    1.90
   4  -8  10   29.50    1.40
  -4   8 -10   31.90    1.20
   4   8  10   30.10    1.50
  -4   8 -10   24.20    1.60
   4  -8   8   32.80    1.50
  -4  -8  -8   28.90    1.80
   4   8   8   31.50    1.50
  -4   8  -8   29.10    1.40
  -4   8  -8   31.30    1.20
  -4   8  -8   26.10    1.20
  -4  -8  -6    4.70    1.10
   4  -8   6    7.80    1.00
  -4   8  -6    4.50    0.60
  -4   8  -6    4.60    0.60
   4   8   6    4.70    0.90
  -4   8  -6    4.40    0.70
  -4  -8  -4    6.30    1.10
   4  -8   4    7.70    0.90
   4   8   4    9.00    0.90
  -4   8  -4    7.10    0.50
   4  -8   2   21.90    1.20
  -4  -8  -2   23.20    1.40
   4   8   2   23.30    1.30
  -4  -8   0   13.70    1.30
  -4  -8   0   11.40    1.50
   4  -8   0   11.40    0.90
   4   8   0   13.60    1.00
   4  -8  -2   61.09    2.30
  -4  -8   2   63.09    2.70
  -4  -8   2   66.19    2.60
   4   8  -2   64.29    2.40
   4  -8  -4   51.19    1.90
  -4  -8   4   51.79    2.30
  -4  -8   4   49.60    2.30
   4   8  -4   51.79    2.10
   4  -8  -6  125.89    4.30
   4  -8  -6  131.79    4.30
  -4  -8   6  137.69    4.70
  -4  -8   6  132.39    4.70
   4   8  -6  135.59    4.50
  -4   8   6  134.09    4.20
   4  -8  -8   41.10    1.70
  -4  -8   8   41.00    2.00
   4  -8  -8   36.70    1.90
  -4  -8   8   43.10    2.10
   4   8  -8   41.60    1.80
  -4   8   8   40.80    1.50
   4  -8 -10  147.09    4.90
  -4  -8  10  147.89    5.30
  -4  -8  10  154.18    5.30
  -4   8  10  150.18    4.80
   4   8 -10  148.09    5.00
  -4  -8  12   19.90    1.60
   4  -8 -12   18.70    1.30
  -4  -8  12   17.50    1.60
   4   8 -12   18.10    1.30
  -4   8  12   17.90    1.10
   4  -8 -14   32.80    1.60
  -4  -8  14   35.10    2.00
  -4   8  14   32.30    1.20
   4   8 -14   32.30    1.70
  -4   8  14   31.80    1.50
   4  -8 -16    5.90    1.00
  -4  -8  16    5.70    1.00
  -4   8  16    5.70    0.90
   4   8 -16    6.10    1.20
  -4   8  16    6.70    0.70
   4  -8 -18   15.30    1.30
  -4  -8  18   18.00    1.30
  -4  -8  18   19.70    1.80
  -4   8  18   14.30    1.00
  -4   8  18   16.50    1.20
   4   8 -18   18.30    1.30
   4  -8 -20   38.60    2.00
  -4  -8  20   41.10    2.00
  -4  -8  20   42.50    2.40
   4   8 -20   40.40    2.00
  -4   8  20   42.00    2.00
  -4   8  20   41.40    1.80
  -4  -8  22    1.40    0.80
  -4  -8  22    2.40    0.90
   4  -8 -22    0.10    0.90
   4   8 -22    2.20    0.80
  -4   8  22    2.60    0.70
  -4  -8  24    0.70    0.90
  -4  -8  24    1.20    0.80
  -4   8  24    2.10    0.80
   4   8 -24    3.60    0.90
  -4   8  24    2.20    0.90
  -4  -8  26    2.80    1.00
  -4  -8  26    4.50    1.10
   4   8 -26    4.40    1.00
  -4   8  26    3.50    1.00
   4  -9  23   13.50    1.80
   4  -9  23   22.20    3.90
  -4  -9 -23   19.50    2.40
   4   9  23   21.40    2.50
   4   9  23   20.30    1.90
  -4   9 -23   16.80    1.50
  -4   9 -23   17.70    5.00
   4  -9  21    0.00    0.90
  -4  -9 -21   -1.20    1.30
  -4   9 -21    1.00    0.70
  -4   9 -21   -2.10    2.30
   4   9  21   -0.10    0.90
   4   9  21    0.20    1.20
   4  -9  19    3.30    1.00
  -4  -9 -19    7.90    1.90
   4   9  19    3.20    0.90
   4   9  19    4.10    1.10
  -4   9 -19    2.80    0.70
  -4   9 -19    4.00    2.00
   4  -9  17   20.10    1.50
  -4  -9 -17   23.80    2.10
   4  -9  17   26.10    1.70
  -4   9 -17   21.30    3.10
   4   9  17   24.90    1.70
  -4  -9 -15  205.08    7.10
   4  -9  15  206.98    6.80
   4  -9  15  205.28    6.80
   4   9  15  204.98    7.00
  -4   9 -15  203.78    8.20
  -4   9 -15  218.48    6.70
   4   9  15  204.28    7.20
   4  -9  13   41.90    1.90
   4  -9  13   44.90    1.90
  -4   9 -13   42.30    1.70
   4  -9  11   74.39    2.80
  -4  -9 -11   77.69    3.30
   4  -9  11   78.39    3.00
   4   9  11   75.69    3.10
  -4   9 -11   80.19    2.70
   4  -9   9   58.89    2.40
  -4  -9  -9   55.69    2.60
   4  -9   9   51.09    2.20
  -4   9  -9   55.69    1.90
   4   9   9   53.09    2.30
  -4  -9  -7    0.50    0.70
  -4   9  -7    0.60    0.90
  -4   9  -7    0.00    0.80
   4   9   7    0.00    0.60
  -4   9  -7    0.40    0.30
  -4  -9  -5   16.90    1.40
   4  -9   5   18.90    1.40
   4   9   5   20.60    1.30
  -4   9  -5   18.90    1.00
  -4   9  -5   18.70    0.90
  -4  -9  -3   16.70    1.40
   4  -9   3   14.70    1.20
   4   9   3   12.80    1.10
  -4   9  -3   13.90    0.60
   4  -9   1    1.70    0.50
  -4  -9  -1    1.20    0.70
   4   9   1    0.00    0.50
  -4  -9   1    1.20    0.80
  -4  -9   1    0.10    0.70
   4  -9  -1   -0.40    0.50
   4   9  -1    0.60    0.60
   4  -9  -3   16.50    1.00
  -4  -9   3   15.40    1.50
  -4  -9   3   15.90    1.50
   4   9  -3   15.90    1.20
  -4  -9   5   45.50    2.20
  -4  -9   5   47.00    2.20
   4  -9  -5   42.40    1.80
   4   9  -5   45.00    2.00
  -4  -9   7  121.29    4.40
   4  -9  -7  121.59    4.00
   4  -9  -7  112.09    4.00
  -4  -9   7  120.29    4.30
   4   9  -7  124.39    4.30
  -4   9   7  122.29    3.90
   4  -9  -9   10.30    1.00
  -4  -9   9   11.30    1.40
  -4  -9   9    9.30    1.30
   4  -9  -9    8.30    1.40
  -4   9   9   10.60    0.70
   4   9  -9   10.50    1.10
  -4  -9  11   60.99    2.70
   4  -9 -11   60.19    2.80
  -4  -9  11   62.89    2.80
   4   9 -11   59.99    2.40
  -4  -9  13   85.79    3.40
  -4  -9  13   83.09    3.50
   4  -9 -13   82.89    3.10
   4   9 -13   80.99    3.00
  -4   9  13   80.99    2.80
  -4   9  13   80.69    2.60
   4  -9 -15  125.79    4.40
  -4  -9  15  127.99    4.70
   4   9 -15  114.49    4.50
  -4   9  15  122.59    3.90
  -4   9  15  127.09    4.10
   4  -9 -17   15.70    1.40
  -4  -9  17   20.40    1.70
  -4   9  17   19.30    1.00
   4   9 -17   20.10    1.40
  -4   9  17   16.40    1.30
  -4  -9  19    7.20    1.20
   4  -9 -19    9.20    1.40
  -4   9  19    6.80    1.10
   4   9 -19    7.40    1.10
  -4  -9  21   -0.40    0.90
   4  -9 -21    1.30    1.30
  -4  -9  21    0.40    0.70
  -4   9  21   -0.90    0.70
   4   9 -21   -0.80    0.80
  -4  -9  23   23.00    2.00
  -4  -9  23   22.60    1.70
   4   9 -23   22.00    1.60
  -4   9  23   19.50    1.60
  -4  -9  25    8.60    1.50
  -4  -9  25   12.80    2.00
  -4   9  25    8.60    1.70
   4   9 -25   11.40    1.50
   4 -10  22    1.80    1.00
  -4 -10 -22    4.60    1.60
  -4  10 -22    4.20    3.10
  -4  10 -22    2.70    0.90
   4  10  22    4.60    1.50
   4 -10  20   -0.70    0.90
  -4 -10 -20   -0.40    1.30
  -4  10 -20    0.80    2.30
  -4  10 -20   -0.20    0.70
   4  10  20   -1.10    1.20
   4  10  20   -0.80    0.90
  -4 -10 -18   15.60    2.20
  -4  10 -18   18.10    1.20
   4  10  18   16.30    1.60
  -4  10 -18   21.80    3.30
   4  10  18   19.90    2.20
  -4 -10 -16   14.10    2.00
   4 -10  16   14.30    1.30
   4  10  16   16.70    1.50
  -4  10 -16   14.90    3.20
   4 -10  14   61.19    2.60
  -4 -10 -14   65.09    3.10
   4  10  14   64.99    2.80
  -4  10 -14   61.19    2.30
   4 -10  12   30.30    1.60
  -4 -10 -12   28.00    2.10
   4  10  12   26.60    2.10
  -4  10 -12   31.30    1.30
  -4 -10 -10   36.40    2.50
   4 -10  10   36.50    2.00
  -4  10 -10   38.40    1.50
   4 -10   8   27.60    1.60
  -4 -10  -8   26.10    2.00
  -4  10  -8   27.60    1.10
   4  10   8   26.20    1.70
  -4 -10  -6   32.70    2.00
   4 -10   6   33.70    1.80
   4  10   6   32.90    1.80
  -4  10  -6   33.40    1.20
  -4 -10  -4    5.90    1.40
   4 -10   4    5.00    1.10
  -4  10  -4    3.90    0.40
   4  10   4    4.20    0.70
  -4 -10  -2    6.80    1.30
  -4 -10  -2    8.30    1.40
   4 -10   2    7.20    1.20
   4  10   2    5.40    1.00
  -4 -10   0   17.90    1.60
  -4 -10   0   20.70    1.70
   4 -10   0   18.80    1.30
   4  10   0   18.10    1.30
   4 -10  -2   23.60    1.40
  -4 -10   2   26.10    1.70
  -4 -10   2   25.80    1.80
   4  10  -2   25.60    1.50
   4 -10  -4    0.70    0.60
  -4 -10   4    1.30    0.80
  -4 -10   4    0.40    0.80
   4  10  -4   -0.90    0.60
  -4 -10   6    5.10    1.30
  -4 -10   6    3.30    0.90
   4 -10  -6    5.50    1.00
   4  10  -6    5.10    1.00
   4 -10  -8   15.10    1.30
  -4 -10   8   11.90    1.60
  -4 -10   8   13.90    1.50
   4  10  -8   16.00    1.30
  -4 -10  10   70.49    3.10
  -4 -10  10   77.69    3.10
   4  10 -10   78.59    2.90
  -4  10  10   75.89    2.60
  -4 -10  12    9.10    1.50
   4 -10 -12    9.80    1.10
  -4  10  12    8.40    0.90
  -4  10  12    8.00    0.60
   4 -10 -14    4.50    0.90
  -4 -10  14    6.20    1.10
  -4 -10  14    7.30    1.40
   4  10 -14    7.00    1.20
  -4  10  14    7.30    0.90
  -4  10  14    7.20    0.70
   4 -10 -16   12.20    1.40
  -4 -10  16   10.60    1.30
  -4 -10  16   10.40    1.60
  -4  10  16   10.80    1.10
   4  10 -16   10.50    1.20
  -4  10  16    8.80    1.00
  -4 -10  18   10.90    1.90
  -4 -10  18   10.00    1.30
  -4  10  18   12.80    2.10
   4  10 -18    9.90    1.30
  -4 -10  20    4.00    0.80
  -4 -10  20    1.00    1.00
   4  10 -20    3.50    0.80
  -4 -10  22   18.00    1.70
  -4 -10  22   16.50    1.80
   4  10 -22   17.80    1.50
  -4 -10  24    0.30    1.10
  -4 -10  24    0.40    1.10
   4 -11  21    4.10    1.00
  -4 -11 -21    6.50    1.70
  -4  11 -21    7.60    2.70
   4  11  21    5.20    1.50
   4  11  21    9.40    1.80
   4 -11  19   46.60    2.40
  -4 -11 -19   47.80    3.00
   4  11  19   42.60    2.40
  -4  11 -19   41.40    1.90
   4  11  19   44.00    2.90
  -4  11 -19   42.70    4.70
  -4 -11 -17    1.20    1.40
   4  11  17   -0.60    0.90
  -4  11 -17    0.30    0.60
  -4  11 -17    0.80    1.90
   4 -11  15    1.50    0.80
  -4 -11 -15    1.00    1.10
   4  11  15    1.00    0.90
   4 -11  13    6.40    1.20
  -4 -11 -13    5.90    1.30
   4  11  13    4.70    0.90
  -4  11 -13    7.00    0.80
  -4 -11 -11   10.30    1.80
  -4  11 -11    8.00    0.70
   4  11  11    7.30    1.40
   4 -11   9  113.59    4.20
  -4 -11  -9  115.19    4.50
   4  11   9  123.39    4.50
  -4  11  -9  120.49    3.90
   4 -11   7   42.60    2.00
  -4  11  -7   47.90    1.60
   4  11   7   42.60    2.50
   4 -11   5    5.70    1.30
  -4 -11  -5    7.90    1.60
  -4  11  -5    5.60    0.50
   4 -11   3    6.50    1.20
  -4 -11  -3   10.40    1.60
  -4  11  -3    3.20    0.40
   4  11   3    2.30    0.70
  -4 -11  -1    4.20    1.00
   4  11   1    6.00    1.10
  -4 -11   1   15.30    1.70
   4 -11  -1   17.10    1.80
   4  11  -1   10.70    1.20
  -4 -11   3    7.70    1.50
  -4 -11   3   10.70    1.50
   4 -11  -3    9.10    1.30
   4  11  -3   10.80    1.20
  -4 -11   5    5.50    0.90
  -4 -11   5    3.80    0.90
   4  11  -5    5.40    1.00
  -4 -11   7   14.60    1.50
  -4 -11   7   15.50    1.90
   4 -11  -9   38.30    1.90
  -4 -11   9   39.40    2.10
   4  11  -9   40.30    2.00
  -4 -11  11   23.80    2.10
  -4 -11  11   24.70    1.80
   4 -11 -11   25.70    1.60
   4  11 -11   24.10    1.50
  -4 -11  13   13.50    1.70
  -4 -11  13   11.50    1.60
   4  11 -13   17.60    1.40
  -4 -11  15   11.10    2.00
  -4 -11  15    9.70    1.60
   4  11 -15   10.20    1.30
  -4 -11  17    9.30    1.30
  -4 -11  17   10.20    1.60
   4  11 -17   12.60    1.40
  -4 -11  19    3.20    0.80
  -4 -11  19    2.40    1.00
   4  11 -19    1.50    0.90
  -4 -11  21   -1.10    1.00
  -4 -11  21    0.30    0.90
   4  11 -21    0.40    1.00
  -4 -12 -18    2.20    1.60
   4 -12  18   -0.10    1.10
   4  12  18    2.70    1.10
  -4 -12 -16   19.00    2.40
  -4  12 -16   17.40    1.20
   4  12  16   18.00    1.90
  -4 -12 -14   11.60    2.20
   4 -12  14    9.00    1.50
   4  12  14   10.10    1.60
  -4 -12 -12    9.20    1.80
   4  12  12    9.70    1.60
  -4  12 -12   10.20    0.80
   4 -12  10    5.80    1.00
  -4 -12 -10    7.30    1.30
  -4  12 -10    6.00    0.70
   4  12  10    6.30    1.00
  -4 -12  -8    6.60    1.20
  -4  12  -8    6.90    0.70
   4  12   8    7.40    1.40
  -4 -12  -6    0.90    1.10
   4 -12   6    1.40    0.90
  -4  12  -6    0.90    0.30
   4  12   6    2.10    0.80
  -4 -12  -4   23.40    2.00
   4 -12   4   18.80    1.60
  -4 -12  -4   18.00    1.80
  -4  12  -4   18.30    0.80
   4  12   4   18.90    1.40
   4 -12   2  200.98    6.80
  -4 -12  -2  210.28    7.10
  -4  12  -2  199.68    6.40
   4  12   2  211.68    6.90
  -4 -12   0  222.18    7.50
   4 -12   0  219.88    7.30
   4  12   0  230.38    7.70
  -4 -12   2   35.70    2.10
   4 -12  -2   35.60    2.00
   4  12  -2   42.70    2.70
  -4 -12   4   28.80    2.40
   4 -12  -4   30.00    1.70
  -4 -12   4   29.40    2.00
   4  12  -4   32.20    2.70
   4 -12  -6   29.90    2.30
  -4 -12   6   32.80    2.20
  -4 -12   6   33.20    2.00
   4  12  -6   30.70    1.70
  -4 -12   8    4.40    0.90
  -4 -12   8    4.10    1.10
   4  12  -8    2.60    0.80
  -4 -12  10    6.00    1.50
  -4 -12  10    7.60    1.70
   4  12 -10    7.70    1.10
  -4 -12  12    7.20    1.50
  -4 -12  12    7.20    1.80
   4  12 -12    6.50    1.20
  -4 -12  14   -1.20    1.00
  -4 -12  14    0.00    0.90
   4  12 -14    5.00    1.10
  -4 -12  16    3.80    1.00
   4  12 -16    6.40    1.30
  -4 -12  18    3.00    1.00
  -4 -12  18    1.90    1.10
   4  12 -18    2.50    0.90
  -4 -12  20   27.40    1.90
   4  12 -20   25.20    1.80
  -4 -13 -17    1.60    1.60
  -4  13 -17   -0.60    0.90
  -4 -13 -15    1.10    1.60
   4  13  15    1.10    1.10
  -4  13 -15   -0.20    0.70
  -4 -13 -13    0.10    1.40
   4  13  13    1.90    1.00
  -4 -13 -11    0.20    1.20
   4  13  11    3.50    1.00
  -4 -13  -9   22.00    2.20
  -4  13  -9   19.10    1.50
   4  13   9   21.50    1.60
  -4 -13  -7   22.30    2.10
   4  13   7   26.90    1.80
  -4 -13  -5   13.10    2.00
   4  13   5   11.00    1.40
  -4 -13  -3   19.10    1.90
   4  13   3   14.90    1.50
  -4 -13  -1   11.10    1.80
   4  13   1    7.80    1.30
  -4 -13   1    8.10    1.80
   4  13  -1    8.70    1.30
  -4 -13   3    4.90    1.10
   4  13  -3    7.30    1.20
  -4 -13   5   45.40    2.70
   4  13  -5   48.40    2.20
  -4 -13   7   88.29    3.90
   4  13  -7   98.49    3.60
  -4 -13   9    0.40    1.00
   4  13  -9    1.90    0.80
  -4 -13  11    3.50    1.20
   4  13 -11    3.00    0.90
  -4 -13  13    2.90    1.10
   4  13 -13    5.50    1.20
  -4 -13  15   31.50    2.60
   4  13 -15   30.20    1.90
   4  13 -17   26.90    1.80
  -4 -14 -14    6.10    1.60
   4  14  14   12.60    2.00
  -4 -14 -12   10.60    2.60
   4  14  12   12.50    1.90
  -4 -14 -10   29.20    2.70
   4  14  10   34.90    2.20
  -4 -14  -8    9.20    2.10
   4  14   8    8.80    1.60
  -4 -14  -6    2.40    1.20
   4  14   6    2.20    0.80
  -4 -14  -4    9.90    2.10
   4  14   4   14.30    1.50
  -4 -14  -2   17.40    2.00
   4  14   2   15.50    1.50
  -4 -14   0    8.20    2.00
   4  14   0    8.50    1.40
  -4 -14   2    3.20    1.20
   4  14  -2    3.40    0.80
  -4 -14   4   36.60    2.60
   4  14  -4   36.70    2.00
  -4 -14   6    9.00    2.00
   4  14  -6   12.10    1.40
  -4 -14   8   12.70    2.00
   4  14  -8    8.60    1.40
  -4 -14  10    5.70    1.20
   4  14 -10    4.30    0.90
  -4 -14  12   -0.50    1.20
   4  14 -12   -1.10    0.90
  -4 -14  14    2.00    1.30
   4  14 -14    2.30    1.00
  -4 -15  -9    8.10    1.70
   4  15   9   11.00    1.80
  -4 -15  -7    0.50    1.50
   4  15   7    6.80    1.60
  -4 -15  -5    9.20    2.40
   4  15   5    1.70    1.00
  -4 -15  -3   -0.60    1.40
   4  15   3    0.60    1.00
  -4 -15  -1    1.00    1.30
   4  15   1    2.70    1.00
  -4 -15   1   -0.20    1.30
   4  15  -1    1.60    0.90
  -4 -15   3    1.80    1.30
   4  15  -3    4.30    1.00
  -4 -15   5    4.80    1.50
   4  15  -5    9.10    1.50
  -4 -15   7   23.20    2.50
   4  15  -7   21.20    1.70
  -4 -15   9    0.00    1.30
   4  15  -9    2.30    1.00
  -4 -15  11    5.60    1.40
   4  15 -11    9.40    1.40
  -4 -16  -4    0.40    1.70
   4  16   4    0.70    1.10
   4  16   2    4.80    1.10
  -4 -16   0    4.50    1.60
   4  16   0    7.60    1.70
  -4 -16   2    0.90    1.40
   4  16  -2    1.80    1.00
  -4 -16   4    3.70    1.60
   4  16  -4    0.30    1.00
  -4 -16   6   -0.30    1.60
   4  16  -6    0.20    1.00
   5   0  27   -0.10    1.20
  -5   0 -27    2.50    1.20
   5   0  25    3.80    1.20
  -5   0 -25    2.70    2.50
  -5   0 -25    5.30    1.10
  -5   0 -23    0.30    2.10
   5   0  23    0.60    0.70
  -5   0 -23    1.20    0.90
   5   0  23    1.90    0.90
  -5   0 -21    5.30    2.00
   5   0  21    5.30    1.10
  -5   0 -21    8.00    1.40
  -5   0 -19   38.10    1.90
   5   0  19   35.00    1.80
   5   0  19   33.50    2.70
  -5   0 -19   31.20    3.70
   5   0  17    2.70    0.60
   5   0  17    2.40    0.80
  -5   0 -17    0.00    1.50
  -5   0 -17    3.00    0.80
  -5   0 -15   16.30    1.20
   5   0  15   17.60    1.50
   5   0  15   15.60    1.10
  -5   0 -15   14.20    2.70
  -5   0 -13    2.20    1.20
  -5   0 -13    2.10    0.50
   5   0  13    2.00    0.40
   5   0  13    2.30    0.70
  -5   0 -11    7.90    0.70
  -5   0 -11    7.90    1.90
   5   0  11    7.40    1.00
  -5   0 -11    9.60    0.80
   5   0  11    8.10    0.80
  -5   0  -9    6.00    0.70
   5   0   9    8.70    1.20
  -5   0  -9    8.70    1.80
   5   0   9    5.00    0.90
  -5   0  -9    6.50    0.90
  -5   0  -7   14.00    1.90
   5   0   7   13.20    0.90
  -5   0  -7   14.10    0.80
   5   0   7   14.20    1.50
  -5   0  -5   -0.10    0.50
  -5   0  -5    0.00    1.30
  -5   0  -5    0.30    0.40
   5   0   5    0.40    0.40
  -5   0  -3   43.60    1.50
   5   0   3   43.30    1.60
   5   0   3   41.70    1.70
  -5   0  -3   43.90    1.60
  -5   0  -1   30.40    1.20
   5   0   1   28.00    1.20
   5   0   1   29.20    1.10
  -5   0  -1   28.70    2.40
   5   0   1   26.80    1.80
   5   0  -1    5.60    0.60
  -5   0   1    3.30    1.10
   5   0  -1    3.60    0.90
   5   0  -1    5.40    0.80
  -5   0   1    5.50    1.40
   5   0  -3    0.30    0.80
   5   0  -3   -0.50    0.40
  -5   0   3    0.30    0.70
   5   0  -3    0.20    0.50
  -5   0   3    0.30    1.30
  -5   0   5    3.10    0.40
  -5   0   5    2.60    0.70
   5   0  -5    1.80    0.90
   5   0  -5    3.30    0.90
  -5   0   5    3.60    0.40
  -5   0   5    4.40    1.30
  -5   0   7    1.50    0.30
  -5   0   7    1.00    0.40
   5   0  -7    0.90    0.70
   5   0  -7    0.60    0.40
  -5   0   7    0.60    1.10
   5   0  -9    4.00    1.10
   5   0  -9    3.50    0.70
  -5   0   9    4.60    1.30
  -5   0   9    4.10    0.50
  -5   0   9    3.50    0.60
   5   0 -11    2.10    0.60
  -5   0  11    2.30    0.50
   5   0 -11    2.40    0.60
  -5   0  11    1.60    0.70
   5   0 -13    0.70    0.50
  -5   0  13    1.50    0.40
  -5   0  13    0.70    0.60
  -5   0  15    0.00    0.30
   5   0 -15    0.30    0.60
  -5   0  15    1.20    0.40
  -5   0  15    0.30    0.70
  -5   0  17    1.40    0.40
  -5   0  17    1.80    0.80
   5   0 -17    3.30    0.80
   5   0 -19   -0.10    0.60
  -5   0  19   -0.30    0.50
  -5   0  19    1.40    0.80
  -5   0  21    0.50    0.50
   5   0 -21    1.30    0.70
  -5   0  23    1.20    0.80
   5   0 -23    0.90    0.70
  -5   0  25    1.80    0.80
  -5   0  25   -1.20    0.70
   5   0 -27    1.70    0.90
  -5   0  27    0.20    0.90
  -5   0  27    0.70    0.80
  -5   0  29   -1.20    0.90
  -5   0  29    0.70    1.00
   5   0 -29    0.00    1.10
   5   1  28   -1.90    1.50
   5  -1  26    8.10    1.70
   5  -1  26    4.20    1.30
  -5  -1 -26    3.40    2.70
  -5  -1 -26    4.80    1.20
   5   1  26    5.80    1.30
  -5   1 -26    7.00    2.80
  -5   1 -26    4.50    1.20
   5   1  26    3.00    0.90
  -5  -1 -24    2.60    2.40
   5  -1  24    3.80    1.10
   5  -1  24    3.40    0.90
  -5  -1 -24    2.60    1.00
   5   1  24    3.40    1.10
  -5   1 -24    5.80    2.30
   5   1  24    1.60    0.80
  -5   1 -24    3.00    1.00
  -5  -1 -22   49.20    2.40
   5  -1  22   46.60    2.30
   5  -1  22   50.89    2.70
  -5   1 -22   51.89    4.40
  -5   1 -22   48.00    2.30
   5   1  22   46.30    2.30
   5   1  22   47.90    2.70
  -5  -1 -20   74.19    3.00
  -5  -1 -20   74.19    4.70
   5  -1  20   71.49    2.90
   5   1  20   70.59    3.30
   5   1  20   73.39    2.90
  -5   1 -20   72.39    4.60
  -5  -1 -18   85.59    3.20
   5  -1  18   85.49    3.50
   5  -1  18   78.09    3.10
  -5  -1 -18   86.39    4.80
  -5   1 -18   84.29    3.10
  -5   1 -18   85.09    4.80
   5   1  18   82.99    3.10
   5   1  18   75.69    3.40
   5  -1  16   71.99    2.70
   5  -1  16   74.19    3.10
  -5  -1 -16   72.69    2.90
  -5  -1 -16   70.89    4.10
  -5   1 -16   75.69    2.80
   5   1  16   74.29    2.80
   5   1  16   73.59    3.20
  -5   1 -16   75.29    4.50
  -5  -1 -14   38.90    3.10
  -5  -1 -14   39.50    1.80
   5  -1  14   38.40    1.70
   5  -1  14   42.70    2.10
   5   1  14   38.80    2.10
  -5   1 -14   39.60    1.70
   5   1  14   37.90    1.70
  -5   1 -14   40.90    3.10
   5  -1  12    0.80    0.60
  -5  -1 -12    1.60    1.20
  -5  -1 -12    1.20    0.50
  -5   1 -12    1.20    0.50
   5   1  12    1.20    0.40
  -5   1 -12    1.00    1.10
   5   1  12    2.10    0.60
  -5  -1 -10   18.50    2.10
   5  -1  10   16.80    1.20
  -5  -1 -10   17.80    1.10
   5  -1  10   16.20    1.30
  -5   1 -10   14.80    2.10
  -5   1 -10   17.00    0.90
   5   1  10   15.00    1.10
  -5   1 -10   16.00    0.90
   5   1  10   18.90    1.40
   5  -1   8  442.16   13.40
  -5  -1  -8  406.76   13.40
  -5  -1  -8  452.25   14.60
  -5  -1  -8  440.56   13.50
   5  -1   8  439.96   13.70
  -5   1  -8  448.46   14.80
  -5   1  -8  446.36   13.60
  -5   1  -8  438.06   13.50
   5   1   8  435.86   13.60
   5   1   8  438.46   13.90
  -5  -1  -6  282.67    9.00
   5  -1   6  289.67    9.00
  -5  -1  -6  286.47    9.20
  -5  -1  -6  303.07   10.10
   5   1   6  281.27    8.90
  -5   1  -6  286.17    8.80
  -5   1  -6  291.87   10.10
  -5   1  -6  282.57    8.80
  -5  -1  -4   61.99    2.30
  -5  -1  -4   63.99    2.20
  -5  -1  -4   64.29    3.50
   5  -1   4   63.69    2.10
   5  -1   4   60.19    2.20
  -5   1  -4   64.89    2.20
   5   1   4   63.49    2.30
  -5   1  -4   66.39    3.70
  -5  -1  -2   38.60    1.40
  -5  -1  -2   37.00    1.60
  -5  -1  -2   34.30    3.20
   5  -1   2   35.30    1.40
   5  -1   2   37.90    1.30
  -5   1  -2   39.80    2.90
   5   1   2   37.90    1.50
  -5   1  -2   33.20    1.90
   5   1   2   33.90    1.50
  -5  -1   0    3.90    0.50
   5  -1   0    2.80    0.60
  -5  -1   0    2.80    1.00
   5  -1   0    4.50    1.30
  -5  -1   0    3.20    0.60
   5  -1   0    2.80    0.40
   5   1   0    3.00    0.80
   5   1   0    2.20    0.40
  -5   1   0    3.00    1.00
   5   1   0    3.40    0.80
  -5  -1   2   24.10    1.00
  -5  -1   2   23.80    1.10
  -5  -1   2   24.40    1.80
   5  -1  -2   23.70    1.80
   5  -1  -2   24.00    1.00
  -5   1   2   23.90    2.00
  -5   1   2   25.60    1.80
   5   1  -2   22.00    1.10
   5   1  -2   23.70    2.00
   5   1  -2   22.70    1.20
  -5  -1   4  143.79    4.50
  -5  -1   4  138.09    5.20
  -5  -1   4  142.49    4.50
   5  -1  -4  142.29    5.00
   5  -1  -4  144.09    4.50
  -5   1   4  138.49    5.00
   5   1  -4  141.49    4.60
  -5   1   4  146.59    5.00
   5   1  -4  136.79    5.10
   5   1  -4  141.49    4.50
   5  -1  -6   18.70    0.90
   5  -1  -6   21.60    1.50
  -5  -1   6   21.70    2.00
  -5  -1   6   20.00    1.00
  -5  -1   6   20.40    0.90
   5  -1  -6   21.00    0.90
  -5   1   6   20.50    1.40
   5   1  -6   24.30    1.20
  -5   1   6   21.10    2.10
   5   1  -6   19.30    1.10
   5   1  -6   20.00    1.70
  -5  -1   8    8.90    0.70
   5  -1  -8    7.90    1.00
  -5  -1   8   10.40    1.50
   5  -1  -8    8.50    0.70
   5   1  -8    7.30    0.80
  -5   1   8   10.70    1.60
   5   1  -8   10.10    1.30
  -5  -1  10   14.70    1.50
   5   1 -10    9.80    0.80
  -5  -1  12   52.89    2.40
  -5  -1  12   48.60    1.80
   5  -1 -12   51.29    1.80
  -5  -1  12   50.39    1.80
  -5   1  12   50.89    1.80
  -5   1  12   52.49    2.30
   5   1 -12   52.79    2.20
   5   1 -12   52.09    2.00
  -5  -1  14   84.99    3.00
  -5  -1  14   85.49    3.40
   5  -1 -14   88.39    3.00
  -5  -1  14   89.09    2.90
   5   1 -14   93.09    3.10
  -5   1  14   86.59    3.00
  -5   1  14   90.89    3.50
   5   1 -14   92.19    3.20
  -5   1  14   92.89    3.00
  -5  -1  16    1.90    0.70
   5  -1 -16    1.30    0.50
  -5  -1  16    1.50    0.40
  -5   1  16    1.20    0.30
  -5   1  16    1.90    0.80
   5   1 -16    3.10    0.80
  -5  -1  18   27.10    1.90
  -5  -1  18   27.30    1.30
   5  -1 -18   28.20    1.40
  -5   1  18   26.10    1.30
   5   1 -18   28.10    1.40
  -5   1  18   29.30    1.30
   5   1 -18   27.90    1.40
  -5   1  18   30.10    1.80
  -5  -1  20   24.20    1.70
   5  -1 -20   19.70    1.30
  -5  -1  20   21.60    1.20
   5   1 -20   23.30    1.40
  -5   1  20   23.10    1.20
  -5   1  20   22.30    1.70
   5  -1 -22   11.70    1.10
  -5  -1  22    8.10    1.50
  -5  -1  22    8.90    1.00
  -5   1  22    7.90    1.00
   5   1 -22    9.70    1.10
  -5   1  22   10.30    1.50
  -5  -1  24   15.80    1.20
  -5  -1  24   15.60    1.60
   5  -1 -24   15.00    1.30
  -5   1  24   14.20    1.20
  -5   1  24   11.40    1.60
  -5  -1  26    7.40    1.10
  -5  -1  26    6.10    1.40
   5  -1 -26    6.60    1.30
  -5   1  26    5.60    1.30
   5   1 -26    6.30    1.30
  -5  -1  28    1.70    0.80
  -5  -1  28    1.40    1.00
  -5   1  28    1.10    1.00
   5   1 -28   -0.70    1.00
  -5   1  28    0.30    0.80
   5  -2  27    8.50    1.60
  -5  -2 -27    7.90    2.00
  -5  -2 -27    6.60    2.70
   5  -2  27    5.90    1.40
   5   2  27    5.20    1.10
  -5   2 -27    3.60    1.10
  -5   2 -27    8.40    2.80
  -5  -2 -25   21.80    4.20
   5  -2  25   23.90    2.30
  -5  -2 -25   21.10    2.00
   5  -2  25   25.20    1.80
   5   2  25   23.10    1.80
   5   2  25   23.40    2.30
  -5   2 -25   20.50    1.80
  -5   2 -25   18.80    4.70
   5  -2  23    3.60    0.80
  -5  -2 -23    4.10    2.00
  -5  -2 -23    2.80    1.00
   5   2  23    4.50    0.90
   5   2  23    3.70    1.00
  -5   2 -23    2.80    0.80
  -5   2 -23    3.20    2.50
  -5  -2 -21    0.70    2.00
  -5  -2 -21    0.60    0.90
   5  -2  21    1.30    0.70
  -5   2 -21    1.00    0.80
   5   2  21    1.30    0.90
   5   2  21    1.30    0.70
   5  -2  19   42.80    2.40
   5  -2  19   43.50    2.00
  -5  -2 -19   44.20    3.50
  -5   2 -19   39.40    3.80
   5   2  19   40.10    1.90
  -5   2 -19   41.60    2.00
   5  -2  17    2.80    0.60
  -5  -2 -17    2.60    0.80
   5  -2  17    5.60    1.40
  -5  -2 -17    3.80    1.50
   5   2  17    5.00    1.00
  -5   2 -17    2.00    1.60
  -5   2 -17    5.20    1.00
   5   2  17    5.40    1.40
  -5  -2 -15    4.00    1.00
   5  -2  15    7.40    1.40
   5  -2  15    5.40    0.80
   5   2  15    2.80    0.80
   5   2  15    5.60    0.90
  -5   2 -15    3.70    1.50
  -5   2 -15    4.80    0.80
  -5  -2 -13   30.80    2.60
   5  -2  13   28.20    1.70
   5  -2  13   31.40    1.40
  -5  -2 -13   32.00    1.60
  -5   2 -13   27.20    2.90
   5   2  13   32.40    1.80
  -5   2 -13   29.10    1.40
   5   2  13   31.30    1.50
  -5  -2 -11   22.20    1.20
   5  -2  11   21.20    1.50
  -5  -2 -11   19.40    2.20
  -5   2 -11   23.00    2.30
  -5   2 -11   20.20    1.00
   5   2  11   20.50    1.50
   5   2  11   19.50    1.10
  -5   2 -11   18.70    1.00
   5  -2   9    8.40    0.70
   5  -2   9    8.30    1.10
  -5  -2  -9    7.90    1.70
  -5  -2  -9    9.40    0.90
   5   2   9    8.30    0.90
   5   2   9    9.60    1.20
  -5   2  -9    8.00    0.80
  -5   2  -9    8.30    0.70
  -5   2  -9    9.10    1.80
  -5  -2  -7   57.69    2.20
   5  -2   7   58.29    2.00
  -5  -2  -7   54.89    2.10
  -5  -2  -7   60.09    3.10
   5  -2   7   56.89    2.60
  -5   2  -7   58.69    2.10
   5   2   7   54.59    2.40
  -5   2  -7   59.79    3.30
   5  -2   5   23.20    1.00
  -5  -2  -5   23.00    1.10
   5  -2   5   23.70    1.00
  -5  -2  -5   23.00    1.50
  -5  -2  -5   22.50    2.20
   5   2   5   23.40    1.30
  -5   2  -5   23.90    2.40
  -5   2  -5   23.40    1.00
  -5  -2  -3   15.40    2.20
  -5  -2  -3   13.00    0.90
   5  -2   3   14.70    0.80
   5  -2   3   14.30    0.80
  -5  -2  -3   14.90    1.30
   5   2   3   13.30    0.90
  -5   2  -3   12.50    1.10
  -5   2  -3   14.20    2.60
  -5  -2  -1   22.90    1.40
  -5  -2  -1   24.50    1.00
   5  -2   1   20.10    0.90
   5  -2   1   19.80    1.50
  -5  -2  -1   25.60    4.40
  -5   2  -1   22.30    2.20
   5   2   1   21.10    1.10
  -5  -2   1  147.49    4.70
  -5  -2   1  148.39    5.40
   5  -2  -1  140.99    5.10
  -5  -2   1  138.39    5.20
  -5  -2   1  151.68    4.60
   5   2  -1  139.59    4.70
  -5   2   1  152.08    5.40
   5   2  -1  135.79    5.30
  -5   2   1  139.49    4.90
   5   2  -1  147.59    4.60
  -5  -2   3  277.97    8.70
  -5  -2   3  287.57    8.60
  -5  -2   3  279.07    9.20
   5  -2  -3  274.27    9.10
  -5   2   3  274.27    9.00
   5   2  -3  273.87    9.30
   5   2  -3  284.67    9.00
  -5   2   3  286.57    9.20
   5   2  -3  278.07    8.70
  -5  -2   5   12.50    0.80
   5  -2  -5   12.40    1.20
  -5  -2   5   11.40    1.10
  -5  -2   5   12.80    1.80
   5  -2  -5   13.50    0.60
   5   2  -5   12.90    0.90
  -5   2   5   13.00    1.80
  -5   2   5   12.10    1.30
   5   2  -5   13.00    1.60
   5  -2  -7   30.80    1.20
  -5  -2   7   31.20    1.30
  -5  -2   7   32.50    2.10
   5  -2  -7   31.00    1.20
  -5   2   7   32.20    2.00
   5   2  -7   30.90    1.40
   5   2  -7   34.20    2.00
  -5   2   7   31.30    1.60
  -5  -2   9   74.99    2.60
  -5  -2   9   80.99    2.70
   5  -2  -9   78.89    2.50
   5  -2  -9   76.89    2.60
  -5  -2   9   75.19    3.20
  -5   2   9   80.09    3.10
   5   2  -9   78.29    3.20
   5   2  -9   77.29    2.70
   5  -2 -11   18.20    0.90
  -5  -2  11   18.70    0.90
  -5  -2  11   20.00    1.60
  -5  -2  11   17.30    1.00
  -5   2  11   18.70    1.40
  -5   2  11   18.80    0.80
   5  -2 -13   17.50    0.90
  -5  -2  13   17.40    0.90
  -5  -2  13   14.60    1.10
  -5  -2  13   17.00    1.50
   5   2 -13   17.40    1.10
  -5   2  13   17.40    0.80
  -5   2  13   18.80    1.40
  -5  -2  15   14.20    0.80
  -5  -2  15   16.30    1.50
  -5   2  15   15.00    1.30
  -5   2  15   14.90    0.80
   5   2 -15   16.10    1.00
  -5   2  15   16.20    0.80
  -5  -2  17   57.19    2.20
   5  -2 -17   59.99    2.20
  -5  -2  17   57.09    2.70
  -5   2  17   59.49    2.10
   5   2 -17   59.59    2.30
  -5   2  17   58.39    2.60
  -5   2  17   58.39    2.10
  -5  -2  19   76.39    2.80
  -5  -2  19   74.89    3.30
   5  -2 -19   76.49    2.70
  -5   2  19   77.19    3.20
  -5   2  19   76.19    2.70
   5   2 -19   78.29    2.90
  -5  -2  21   10.40    1.80
  -5  -2  21   10.80    0.90
   5  -2 -21    8.90    1.00
  -5   2  21   11.20    1.00
   5   2 -21   10.70    1.20
  -5  -2  23    9.00    1.00
   5  -2 -23    8.30    1.10
  -5  -2  23    7.70    1.40
  -5   2  23    7.80    1.50
  -5   2  23    8.60    1.10
   5  -2 -25    7.30    1.20
  -5  -2  25    6.20    1.00
  -5  -2  25    7.20    1.10
   5   2 -25    8.40    1.20
  -5   2  25    9.20    1.50
  -5   2  25    8.80    1.20
   5  -2 -27   -1.10    0.90
  -5  -2  27   -0.10    0.90
  -5  -2  27   -0.90    0.80
  -5   2  27    1.90    0.90
   5   2 -27   -0.80    0.90
  -5  -2  29    1.90    0.90
   5  -2 -29    2.60    1.00
   5   2 -29   -0.30    1.10
  -5   2  29    2.50    1.10
  -5   2  29    2.00    0.90
   5  -3  26   32.30    2.00
  -5  -3 -26   29.90    2.30
  -5  -3 -26   33.80    4.30
   5  -3  26   30.20    2.70
  -5   3 -26   26.50    5.30
   5   3  26   33.90    2.20
   5   3  26   30.10    2.50
  -5   3 -26   27.40    2.10
   5  -3  24   18.00    2.10
  -5  -3 -24   18.30    1.80
  -5  -3 -24   13.30    3.90
   5  -3  24   17.50    1.60
  -5   3 -24   14.80    1.50
  -5   3 -24   14.00    2.60
   5   3  24   20.50    2.10
   5  -3  22    0.70    1.00
  -5  -3 -22    1.50    1.00
   5  -3  22    0.20    0.70
  -5   3 -22    0.70    0.80
   5   3  22    1.20    0.80
   5   3  22   -0.80    0.90
  -5   3 -22    1.20    2.50
   5  -3  20   20.80    1.50
  -5  -3 -20   23.90    3.30
  -5  -3 -20   20.40    1.70
  -5   3 -20   21.60    1.60
   5   3  20   24.10    2.00
   5   3  20   22.50    1.80
   5  -3  18    3.70    0.90
   5  -3  18    2.90    0.60
  -5  -3 -18    5.30    1.70
  -5  -3 -18    2.00    0.90
   5   3  18    2.90    1.10
  -5   3 -18    1.90    0.70
   5   3  18    3.20    0.60
  -5   3 -18    4.30    1.80
   5  -3  16   38.60    1.70
   5  -3  16   36.90    2.10
  -5  -3 -16   38.20    1.90
  -5  -3 -16   33.50    3.00
  -5   3 -16   38.40    1.70
  -5   3 -16   36.00    3.30
   5   3  16   34.40    2.00
   5   3  16   37.50    1.80
  -5  -3 -14   37.40    1.90
   5  -3  14   34.90    1.90
  -5  -3 -14   41.30    3.00
   5  -3  14   37.30    1.60
   5   3  14   37.90    2.10
  -5   3 -14   37.90    3.00
  -5   3 -14   37.10    1.60
   5   3  14   35.50    1.70
  -5  -3 -12   10.30    1.00
   5  -3  12   10.00    1.00
   5  -3  12   10.50    1.20
  -5  -3 -12   10.80    1.90
   5   3  12   11.70    1.30
  -5   3 -12   11.20    0.80
   5   3  12   11.10    0.90
  -5   3 -12   10.20    2.10
  -5  -3 -10   18.30    2.00
   5  -3  10   20.60    1.30
   5  -3  10   17.20    1.00
  -5  -3 -10   18.60    1.20
  -5   3 -10   17.90    1.20
  -5   3 -10   19.00    0.90
   5   3  10   19.50    1.10
   5   3  10   16.30    1.40
  -5   3 -10   18.70    2.10
   5  -3   8    1.60    0.70
   5  -3   8    1.50    0.30
  -5  -3  -8    2.70    1.00
  -5   3  -8    1.60    0.60
  -5   3  -8    2.40    1.00
   5   3   8    2.80    0.70
  -5   3  -8    1.80    0.50
  -5  -3  -6   94.89    3.30
  -5  -3  -6   97.19    4.20
  -5  -3  -6  101.39    3.40
   5  -3   6  101.39    3.20
  -5   3  -6  102.19    4.50
  -5   3  -6  101.69    3.20
  -5  -3  -4   49.40    2.10
  -5  -3  -4   49.70    2.90
   5  -3   4   47.60    1.60
  -5  -3  -4   44.50    1.80
   5  -3   4   46.80    1.60
  -5   3  -4   43.70    1.90
   5   3   4   48.70    2.00
  -5   3  -4   50.19    2.90
  -5  -3  -2   60.49    2.40
   5  -3   2   60.99    1.90
  -5  -3  -2   57.59    2.10
  -5  -3  -2   59.19    3.10
   5   3   2   60.79    2.20
  -5   3  -2   58.19    3.70
  -5   3  -2   55.89    2.40
  -5  -3   0    9.30    0.80
  -5   3   0   10.40    1.70
  -5   3   0   11.60    1.30
   5   3   0    9.50    1.00
  -5  -3   2    4.80    1.30
  -5  -3   2    6.00    0.80
   5   3  -2    4.80    0.90
  -5   3   2    4.60    1.20
  -5   3   2    5.30    1.30
  -5  -3   4  460.85   14.50
   5  -3  -4  457.15   14.20
  -5  -3   4  450.95   14.00
   5   3  -4  447.86   14.00
  -5   3   4  462.75   14.50
  -5   3   4  461.65   14.20
   5   3  -4  449.66   15.00
  -5  -3   6    6.40    1.60
  -5  -3   6    4.60    1.10
   5  -3  -6    5.70    0.40
  -5  -3   6    4.10    0.80
  -5   3   6    6.00    1.50
   5   3  -6    6.00    1.20
   5   3  -6    5.00    0.90
  -5   3   6    5.40    1.00
  -5  -3   8    7.80    1.50
  -5  -3   8    8.10    0.80
   5  -3  -8    7.30    0.60
   5  -3  -8    6.20    0.50
  -5  -3   8    8.00    0.70
   5   3  -8    5.30    0.90
  -5   3   8    6.50    0.90
  -5   3   8    7.80    1.40
  -5  -3  10   53.89    2.40
  -5  -3  10   53.69    1.90
   5  -3 -10   52.09    1.80
  -5  -3  10   51.19    2.00
   5   3 -10   52.29    2.10
  -5   3  10   53.39    2.20
  -5  -3  12    0.30    0.30
  -5  -3  12    1.70    0.70
   5  -3 -12    0.90    0.30
   5   3 -12    0.90    0.40
  -5   3  12    1.40    0.60
  -5   3  12    0.90    0.30
  -5  -3  14    4.30    0.60
   5  -3 -14    4.70    0.60
  -5  -3  14    5.00    1.30
  -5   3  14    4.90    0.50
  -5   3  14    3.60    1.00
   5   3 -14    5.80    0.80
  -5   3  14    5.60    0.50
  -5  -3  16    7.70    1.30
  -5  -3  16    8.20    0.80
   5  -3 -16    8.80    0.90
  -5   3  16    7.90    0.70
   5   3 -16    7.10    0.90
  -5   3  16    9.30    0.60
  -5   3  16    8.80    1.20
  -5  -3  18   99.19    4.00
  -5  -3  18  101.79    3.50
   5  -3 -18   98.89    3.40
  -5   3  18   98.79    3.80
   5   3 -18  102.09    3.60
  -5   3  18  101.49    3.40
  -5  -3  20   10.40    0.90
   5  -3 -20    9.20    1.00
   5   3 -20    9.90    1.20
  -5   3  20   10.30    0.80
  -5   3  20    9.20    1.30
   5  -3 -22    0.80    0.70
  -5  -3  22    1.60    0.50
  -5  -3  22    1.50    0.90
  -5   3  22    1.80    0.60
  -5   3  22    1.80    0.90
   5   3 -22    2.60    0.80
  -5  -3  24   11.50    1.50
  -5  -3  24   13.60    1.20
   5  -3 -24   10.00    1.20
  -5   3  24   12.80    1.50
   5   3 -24   10.00    1.40
  -5  -3  26   15.40    1.40
  -5  -3  26   17.40    1.70
  -5   3  26   15.20    1.70
  -5   3  26   15.00    1.40
   5   3 -26   16.10    1.60
   5  -3 -28   18.00    1.70
  -5  -3  28   21.40    1.60
  -5  -3  28   20.80    1.90
  -5   3  28   19.60    1.60
  -5   3  28   23.80    2.00
   5   3 -28   18.30    1.70
   5  -4  27    3.20    1.40
  -5  -4 -27    3.30    2.50
  -5  -4 -27    1.30    1.30
   5  -4  27    2.00    1.10
  -5   4 -27    4.90    3.20
  -5   4 -27    6.70    1.70
   5   4  27    3.20    1.10
   5  -4  25   15.90    1.70
  -5  -4 -25   17.80    2.00
   5  -4  25   17.80    2.20
  -5  -4 -25   12.70    3.90
  -5   4 -25   15.60    1.60
  -5   4 -25   12.00    2.90
   5   4  25   13.20    2.30
   5   4  25   16.70    1.80
   5  -4  23    8.10    1.90
   5  -4  23    9.10    1.40
  -5  -4 -23    5.40    1.20
  -5  -4 -23   13.20    3.50
  -5   4 -23    6.10    2.70
   5   4  23    8.70    1.60
   5   4  23    6.60    1.20
  -5   4 -23    5.50    1.30
   5  -4  21    7.10    1.70
   5  -4  21    7.50    1.40
  -5   4 -21    4.20    1.10
   5   4  21    7.50    1.80
   5   4  21    8.00    1.40
  -5   4 -21    5.70    2.10
   5  -4  19    5.20    1.10
  -5  -4 -19    3.80    1.00
   5  -4  19    6.50    1.50
  -5  -4 -19    4.70    1.80
  -5   4 -19    4.10    1.00
  -5  -4 -17    2.20    0.80
  -5  -4 -17    2.50    1.60
   5  -4  17    2.10    0.60
   5  -4  17    1.50    0.90
   5   4  17    2.10    0.70
  -5   4 -17    1.60    0.60
  -5   4 -17    3.40    1.70
   5  -4  15   -0.40    0.50
   5  -4  15    0.20    0.80
  -5  -4 -15    0.80    1.20
  -5  -4 -15   -0.20    0.70
   5   4  15    0.00    0.80
   5   4  15   -0.10    0.50
  -5   4 -15    0.50    0.50
  -5   4 -15    3.30    1.40
  -5  -4 -13    7.20    1.90
  -5  -4 -13    5.00    1.10
   5  -4  13    7.00    1.20
   5  -4  13    5.80    0.80
  -5   4 -13    7.70    2.30
  -5   4 -13    5.30    0.70
  -5   4 -13    4.20    1.10
   5   4  13    6.20    0.90
   5  -4  11    3.90    1.00
  -5  -4 -11    2.00    1.10
  -5   4 -11    1.00    0.60
   5   4  11    2.30    0.70
  -5  -4  -9   37.30    1.80
   5  -4   9   40.20    1.50
   5  -4   9   39.70    1.90
  -5  -4  -9   39.80    2.50
   5   4   9   39.30    1.70
  -5   4  -9   36.80    1.60
  -5   4  -9   39.80    2.60
  -5   4  -9   40.70    1.50
  -5  -4  -7    8.70    1.00
  -5  -4  -7   10.80    1.50
   5  -4   7    9.80    1.30
   5  -4   7    8.40    0.60
  -5   4  -7    8.70    0.70
  -5   4  -7    8.70    1.70
   5   4   7    8.80    0.80
  -5   4  -7    8.60    0.60
  -5  -4  -5   10.50    1.00
  -5  -4  -5   12.20    1.60
   5  -4   5    9.00    0.60
   5   4   5   13.10    1.10
  -5   4  -5   11.50    0.90
  -5   4  -5   10.30    1.60
   5  -4   3   40.30    1.40
  -5  -4  -3   38.30    1.60
   5  -4   3   42.50    1.40
  -5  -4  -3   40.20    1.80
  -5   4  -3   39.20    1.80
  -5   4  -3   41.00    2.60
  -5  -4  -1   53.29    2.10
  -5  -4  -1   55.19    2.30
   5   4   1   53.19    2.40
  -5   4  -1   55.99    3.00
  -5   4  -1   52.29    2.10
  -5  -4   1  282.27    8.50
  -5  -4   1  259.57    8.80
  -5  -4   1  259.37    8.40
  -5   4   1  273.57    9.10
   5   4  -1  270.67    8.50
  -5   4   1  263.97    8.60
  -5  -4   3   40.90    2.40
  -5  -4   3   41.10    1.90
  -5  -4   3   38.50    1.70
   5   4  -3   38.40    1.70
  -5   4   3   40.20    1.90
  -5   4   3   38.40    2.00
  -5  -4   5  131.89    4.70
   5  -4  -5  119.29    4.40
  -5  -4   5  138.29    4.40
  -5  -4   5  127.79    4.30
  -5   4   5  137.79    4.60
  -5   4   5  131.59    4.80
   5  -4  -7  214.98    6.70
  -5  -4   7  226.18    7.30
   5  -4  -7  219.08    6.60
  -5  -4   7  224.38    7.00
  -5  -4   7  204.48    6.90
  -5   4   7  219.58    7.40
  -5   4   7  221.28    7.20
   5   4  -7  219.48    7.00
  -5  -4   9   28.00    1.80
   5  -4  -9   25.60    1.00
  -5   4   9   27.50    1.60
  -5   4   9   25.20    1.30
   5   4  -9   27.00    1.30
  -5  -4  11  100.49    3.90
  -5  -4  11  104.39    3.50
   5  -4 -11  102.79    3.30
   5   4 -11  102.59    3.50
  -5   4  11  107.59    3.70
   5  -4 -13  140.29    4.50
  -5  -4  13  143.19    5.10
  -5  -4  13  140.39    4.70
  -5   4  13  142.89    4.90
  -5   4  13  137.29    4.40
   5   4 -13  145.19    4.70
  -5  -4  15   87.39    3.10
  -5  -4  15   85.09    3.50
   5  -4 -15   83.79    2.90
   5   4 -15   86.49    3.00
  -5   4  15   84.89    2.80
  -5   4  15   86.79    3.20
  -5   4  15   82.59    2.80
  -5  -4  17   19.50    1.10
  -5  -4  17   19.90    1.80
   5  -4 -17   20.60    1.10
   5   4 -17   20.70    1.30
  -5   4  17   20.20    1.50
  -5   4  17   20.10    1.00
  -5  -4  19   44.10    1.90
  -5  -4  19   45.00    2.40
   5  -4 -19   43.10    1.80
  -5   4  19   40.80    2.10
  -5   4  19   42.50    1.70
   5   4 -19   43.50    2.00
  -5  -4  21   13.90    1.20
  -5  -4  21   14.90    1.60
   5  -4 -21   13.80    1.20
   5   4 -21   17.00    1.30
  -5   4  21   15.00    1.00
  -5   4  21   14.90    1.60
  -5  -4  23    1.90    0.90
   5  -4 -23    1.00    0.70
  -5  -4  23    2.10    0.60
  -5   4  23    2.90    0.80
  -5   4  23    1.50    0.60
   5   4 -23    0.60    0.70
  -5  -4  25    0.50    0.90
  -5  -4  25    1.30    0.70
   5  -4 -25    1.70    0.80
  -5   4  25    1.00    0.70
   5   4 -25    2.00    0.90
  -5   4  25   -0.20    0.80
  -5  -4  27   29.60    1.70
  -5  -4  27   22.60    2.10
   5  -4 -27   24.10    1.90
  -5   4  27   32.10    1.70
  -5   4  27   28.80    2.10
   5   4 -27   25.20    1.80
  -5  -5 -26    3.50    1.40
   5  -5  26    2.10    1.40
   5  -5  26    2.00    1.00
   5   5  26    2.80    1.10
  -5   5 -26    1.50    3.00
   5   5  26    5.30    1.40
  -5   5 -26    1.80    1.00
  -5  -5 -24    0.30    2.20
  -5  -5 -24    1.90    1.30
   5  -5  24    2.10    0.80
  -5   5 -24   -3.10    2.90
  -5   5 -24    2.20    0.90
   5   5  24    2.80    1.30
   5   5  24    3.00    1.00
  -5  -5 -22    1.20    1.00
  -5  -5 -22    0.40    2.00
   5  -5  22   -0.50    1.10
   5  -5  22    0.20    0.80
   5   5  22    1.20    0.80
  -5   5 -22    3.30    2.60
   5   5  22    1.10    1.10
   5  -5  20    1.20    0.70
  -5  -5 -20    1.40    0.90
  -5  -5 -20   -1.50    2.10
  -5   5 -20    5.70    2.10
  -5   5 -20    0.40    0.70
   5   5  20    0.60    0.70
   5   5  20    0.20    1.00
  -5  -5 -18   19.60    1.60
   5  -5  18   20.30    1.30
  -5  -5 -18   14.50    2.60
   5  -5  18   22.90    1.80
   5   5  18   18.80    2.00
  -5   5 -18   19.70    1.20
   5  -5  16    7.60    0.90
   5  -5  16    5.10    0.90
  -5  -5 -16    5.70    1.40
  -5  -5 -16    6.10    1.20
  -5   5 -16    5.00    1.80
   5   5  16    4.90    1.00
   5   5  16    5.60    1.00
  -5   5 -16    5.80    0.90
   5  -5  14   12.10    1.40
   5  -5  14    8.50    0.90
  -5  -5 -14    6.50    2.00
  -5  -5 -14    9.20    1.30
  -5   5 -14    9.70    0.80
  -5   5 -14   10.60    2.40
   5   5  14    7.60    1.50
   5   5  14    9.00    1.10
  -5  -5 -12   10.40    1.90
   5  -5  12    8.60    0.80
   5  -5  12    6.70    1.20
  -5  -5 -12    7.30    1.10
  -5   5 -12    5.30    1.10
   5   5  12    7.80    1.30
  -5   5 -12    8.10    0.70
   5   5  12    6.90    0.90
  -5  -5 -10   21.50    1.40
   5  -5  10   22.20    1.40
   5  -5  10   22.10    1.10
  -5  -5 -10   20.20    2.00
  -5   5 -10   23.60    1.00
  -5   5 -10   21.90    1.20
  -5   5 -10   20.00    2.20
   5   5  10   18.80    1.20
   5  -5   8   14.10    0.80
   5  -5   8   17.20    1.40
  -5  -5  -8   15.10    1.20
  -5   5  -8   18.00    1.90
  -5   5  -8   15.00    0.90
   5   5   8   14.10    1.00
  -5  -5  -6   81.29    3.00
   5  -5   6   82.99    2.70
   5   5   6   84.79    3.00
  -5   5  -6   86.09    3.80
  -5   5  -6   77.49    2.90
  -5  -5  -4   16.60    1.20
   5  -5   4   16.30    0.70
  -5   5  -4   17.60    1.80
  -5   5  -4   16.60    1.10
   5   5   4   17.50    1.00
   5  -5   2   58.79    1.90
   5  -5   2   58.29    2.00
  -5  -5  -2   61.49    2.40
   5   5   2   61.09    2.30
  -5   5  -2   61.19    2.90
  -5   5  -2   57.29    2.20
  -5  -5   0   22.60    1.70
  -5  -5   0   21.40    1.40
  -5   5   0   21.30    1.80
   5   5   0   21.00    1.20
  -5   5   0   19.10    1.30
  -5  -5   2   18.50    1.30
  -5  -5   2   19.10    1.70
  -5   5   2   19.10    1.70
  -5   5   2   19.60    1.30
   5   5  -2   19.10    1.30
  -5  -5   4    3.60    0.90
  -5  -5   4    3.20    0.60
  -5   5   4    4.30    1.00
  -5   5   4    3.00    0.70
   5   5  -4    2.70    0.60
   5  -5  -6   11.80    1.20
  -5  -5   6   10.80    1.40
  -5  -5   6   10.60    1.00
   5  -5  -6    9.80    0.60
   5   5  -6   10.10    0.90
  -5   5   6    9.50    1.00
  -5   5   6   11.30    1.20
  -5  -5   8   34.30    2.00
   5  -5  -8   34.10    1.20
  -5  -5   8   34.90    1.60
   5  -5  -8   31.90    1.20
  -5   5   8   36.10    2.80
   5   5  -8   36.70    1.50
  -5   5   8   33.00    1.60
  -5  -5  10   24.20    1.70
   5  -5 -10   23.20    1.00
   5   5 -10   23.60    1.20
  -5   5  10   23.90    1.40
  -5   5  10   21.30    1.20
   5  -5 -12  105.29    3.50
  -5  -5  12  110.69    3.70
  -5  -5  12  104.39    4.00
  -5   5  12  110.99    3.80
   5   5 -12  109.29    3.70
  -5  -5  14    3.50    0.90
   5  -5 -14    2.70    0.70
  -5   5  14    3.30    0.70
   5   5 -14    4.80    0.80
  -5  -5  16   18.60    1.70
  -5  -5  16   14.80    1.10
   5  -5 -16   16.40    1.20
   5   5 -16   18.50    1.30
  -5   5  16   17.70    0.80
  -5   5  16   17.40    1.30
  -5  -5  18   47.70    2.50
   5  -5 -18   48.40    1.90
  -5  -5  18   50.49    2.10
  -5   5  18   49.40    2.30
  -5   5  18   49.99    1.80
   5   5 -18   47.80    2.10
  -5  -5  20   24.10    1.40
  -5  -5  20   23.80    2.10
   5  -5 -20   20.20    1.30
  -5   5  20   24.10    1.60
   5   5 -20   24.60    1.50
  -5   5  20   22.80    1.20
  -5  -5  22    2.30    1.00
   5  -5 -22    2.90    0.70
  -5  -5  22    2.10    0.70
   5   5 -22    2.40    0.80
  -5   5  22    3.30    0.60
  -5   5  22    3.50    0.80
   5  -5 -24    0.70    0.80
  -5  -5  24    1.50    0.90
  -5  -5  24    1.60    0.70
  -5   5  24    0.70    0.80
  -5   5  24    1.50    0.80
   5   5 -24    1.60    0.80
  -5  -5  26   31.50    1.80
  -5  -5  26   27.40    2.20
   5   5 -26   27.90    1.90
  -5   5  26   30.50    1.70
  -5   5  26   30.10    2.00
  -5  -5  28    7.00    1.60
   5  -5 -28    1.80    1.90
  -5  -5  28    3.30    1.00
   5   5 -28    3.20    1.00
  -5   5  28    0.90    1.00
  -5   5  28    2.70    0.90
  -5  -6 -25    1.40    1.40
   5  -6  25    0.00    1.30
[truncated: 222,792 more chars]
