# Supplementary material for: Hemi-Synthesis of Chiral Imine, Benzimidazole and Benzodiazepines from Essential Oil of Ammodaucus leucotrichus subsp. leucotrichus
Source: Molecules. 2019 Mar 10;24(5):975. doi: 10.3390/molecules24050975 (PMC6429316; doi:10.3390/molecules24050975)
Supplement: Supplementary file 1 [file molecules-24-00975-s001.zip › 4.cif]

 
data_4

#==============================================================================
# SUBMISSION DETAILS
#==============================================================================


_publ_contact_author_name         'Professor Artur Silva'
_publ_contact_author_address
; Department of Chemistry
  University of Aveiro
  CICECO
  3810-193
  Aveiro
  Portugal
;
_publ_contact_author_email        'artur.silva@ua.pt'
_publ_contact_author_fax          '+351 234 370084'
_publ_contact_author_phone        '+351 234 370714'

_journal_name_full                'SynLett'

loop_
_publ_author_name
_publ_author_address
_publ_author_footnote


 'Chebrouk, Farid'
;
  Laboratoire de Biomathematiques, Biophysique, Biochimie et Scientometrie 
  (L3BS)
  Faculte des Sciences de la Nature et de la Vie
  Universite de Bejaia
  06000 Bejaia
  Algeria
;
.

 'Khodir, Madani'
;
  Laboratoire de Biomathematiques, Biophysique, Biochimie et Scientometrie 
  (L3BS)
  Faculte des Sciences de la Nature et de la Vie
  Universite de Bejaia
  06000 Bejaia
  Algeria
;
.

 'Cherfaoui, Brahim'
;
  Centre de Recherche Scientifique et Technique en Analyses Physico-Chimiques
  BP 384, Bou-Ismail
  42004 Tipaza
  Algeria
;
.

 'Boukenna, Leila'
;
  Centre de Recherche Scientifique et Technique en Analyses Physico-Chimiques
  BP 384, Bou-Ismail
  42004 Tipaza
  Algeria
;
.

 'Valega, Monica'
;
  Department of Chemistry
  University of Aveiro
  QOPNA
  3810-193
  Aveiro
  Portugal
;
.

 'Talhi, Oualid'
;
  Centre de Recherche Scientifique et Technique en Analyses Physico-Chimiques
  BP 384, Bou-Ismail
  42004 Tipaza
  Algeria
  
  and
  
  Department of Chemistry
  University of Aveiro
  QOPNA
  3810-193
  Aveiro
  Portugal
;  
.

 'Mendes, Ricardo F.' 
; 
  Department of Chemistry
  University of Aveiro
  CICECO - Aveiro Institute of Materials
  3810-193
  Aveiro
  Portugal
;
.

'Almeida Paz, Filipe A.' 
; 
  Department of Chemistry
  University of Aveiro
  CICECO - Aveiro Institute of Materials
  3810-193
  Aveiro
  Portugal
;
.

 'Bachari, Khaldoun'
;
  Centre de Recherche Scientifique et Technique en Analyses Physico-Chimiques
  BP 384, Bou-Ismail
  42004 Tipaza
  Algeria
;
.

 'Silva, Artur M. S.'
;
  Department of Chemistry
  University of Aveiro
  QOPNA
  3810-193
  Aveiro
  Portugal
;
.

#=============================================================================
# start Validation Reply Form
# VALIDATION REPLY FORM
#

# Alerts LEVEL B
_vrf_PLAT111_4
;
PROBLEM: ADDSYM Detects New (Pseudo) Centre of Symmetry .        100 %Fit  
RESPONSE: This is an artifact because the structure needs to be 
non-centrosymmetric due to the use of a chiral natural product.
;

_vrf_PLAT220_4
;
PROBLEM: Non-Solvent  C   Ueq(max)/Ueq(min) Range    
RESPONSE: This is alert arises due to the fact that the terminal methyl groups
of the two crystallographically independent molecular units are strongly 
affected by thermal disorder which is translated into large Ueq. The 
disorder could not be modelled over, at least, two distinct crystallographic
positions, hence the Alert.
;


_vrf_PLAT201_4
;
PROBLEM: Isotropic non-H Atoms in Main Residue(s)  
RESPONSE: This is alert arises due to the fact that the terminal methyl groups
of the two crystallographically independent molecular units are strongly 
affected by thermal disorder which could not be modelled over, at least,
two distinct crystallographic positions. These atoms were included in the
final structural model with isotropic displacement parameters giving, in 
this fashion, rise to this Alert.
;

# end Validation Reply Form
#=============================================================================

#=============================================================================
_audit_creation_method            'SHELXL-2018/3, manual editing plus enCIFer'
_audit_creation_date              '04 December 2018'
_shelx_SHELXL_version_number      '2018/3'
#=============================================================================

_chemical_name_systematic         ?
_chemical_name_common             ?
_chemical_melting_point           ?
_chemical_formula_moiety          
 'C50 H64 N4 O2'
_chemical_formula_sum
 'C50 H64 N4 O2' 
_chemical_formula_weight          753.05

loop_
 _atom_type_symbol
 _atom_type_description
 _atom_type_scat_dispersion_real
 _atom_type_scat_dispersion_imag
 _atom_type_scat_source
 'C'  'C'   0.0033   0.0016
 'International Tables Vol C Tables 4.2.6.8 and 6.1.1.4'
 'H'  'H'   0.0000   0.0000
 'International Tables Vol C Tables 4.2.6.8 and 6.1.1.4'
 'N'  'N'   0.0061   0.0033
 'International Tables Vol C Tables 4.2.6.8 and 6.1.1.4'
 'O'  'O'   0.0106   0.0060
 'International Tables Vol C Tables 4.2.6.8 and 6.1.1.4'
 
#=============================================================================
# CRYSTAL DATA
#=============================================================================
 
_space_group_crystal_system       monoclinic
_space_group_IT_number            5
_space_group_name_H-M_alt         'I 2'
_space_group_name_Hall            'I 2y'
 
_shelx_space_group_comment
;
The symmetry employed for this shelxl refinement is uniquely defined
by the following loop, which should always be used as a source of
symmetry information in preference to the above space-group names.
They are only intended as comments.
;
 
loop_
 _space_group_symop_operation_xyz
 'x, y, z'
 '-x, y, -z'
 'x+1/2, y+1/2, z+1/2'
 '-x+1/2, y+1/2, -z+1/2'
 
_cell_length_a                    11.6925(14)
_cell_length_b                    14.2324(16)
_cell_length_c                    26.184(4)
_cell_angle_alpha                 90
_cell_angle_beta                  92.664(4)
_cell_angle_gamma                 90
_cell_volume                      4352.7(10)
_cell_formula_units_Z             4
_cell_measurement_temperature     150(2)
_cell_measurement_reflns_used     9921
_cell_measurement_theta_min       2.69
_cell_measurement_theta_max       25.41
 
_exptl_crystal_description        Block
_exptl_crystal_colour             Colourless
_exptl_crystal_density_meas       ?
_exptl_crystal_density_method     ?
_exptl_crystal_density_diffrn     1.149          
_exptl_crystal_F_000              1632
_exptl_transmission_factor_min    0.6660
_exptl_transmission_factor_max    0.7452
_exptl_crystal_size_max           0.230
_exptl_crystal_size_mid           0.210
_exptl_crystal_size_min           0.100
_exptl_absorpt_coefficient_mu     0.070
_shelx_estimated_absorpt_T_min    0.984
_shelx_estimated_absorpt_T_max    0.993
_exptl_absorpt_correction_type    multi-scan
_exptl_absorpt_correction_T_min   ?
_exptl_absorpt_correction_T_max   ?
_exptl_absorpt_process_details    
; 
  SADABS-2016/2
  Reference: Krause, L., Herbst-Irmer, R., Sheldrick G.M. & Stalke D.,
  J. Appl. Cryst. 48 (2015) 3-10.
; 
 
#=============================================================================
# EXPERIMENTAL DATA
#============================================================================= 

_exptl_special_details
;
 ?
;
_diffrn_ambient_temperature       150(2)
_diffrn_radiation_wavelength      0.71073 
_diffrn_radiation_type            MoK\a 
_diffrn_radiation_source          'Sealed tube' 
_diffrn_radiation_monochromator   'Multi-layer X-ray mirror' 
_diffrn_measurement_device_type   'Bruker D8 QUEST '
_diffrn_measurement_method        '\w / \f scans'
_diffrn_detector_area_resol_mean  10.4167 
_diffrn_standards_number          0 
_diffrn_standards_interval_count  . 
_diffrn_standards_interval_time   . 
_diffrn_standards_decay_%         ?
_diffrn_reflns_number             16198
_diffrn_reflns_av_unetI/netI      0.0252
_diffrn_reflns_av_R_equivalents   0.0244
_diffrn_reflns_limit_h_min        -14
_diffrn_reflns_limit_h_max        14
_diffrn_reflns_limit_k_min        -17
_diffrn_reflns_limit_k_max        16
_diffrn_reflns_limit_l_min        -31
_diffrn_reflns_limit_l_max        31
_diffrn_reflns_theta_min          3.754
_diffrn_reflns_theta_max          25.348
_diffrn_reflns_theta_full         25.242
_diffrn_measured_fraction_theta_max   0.993
_diffrn_measured_fraction_theta_full  0.995
_diffrn_reflns_Laue_measured_fraction_max    0.993
_diffrn_reflns_Laue_measured_fraction_full   0.995
_diffrn_reflns_point_group_measured_fraction_max   0.936
_diffrn_reflns_point_group_measured_fraction_full  0.941
_reflns_number_total              7457
_reflns_number_gt                 6717
_reflns_threshold_expression      'I > 2\s(I)'
_reflns_Friedel_coverage          0.807
_reflns_Friedel_fraction_max      0.874
_reflns_Friedel_fraction_full     0.881
 
_reflns_special_details
;
 Reflections were merged by SHELXL according to the crystal
 class for the calculation of statistics and refinement.
 
 _reflns_Friedel_fraction is defined as the number of unique
 Friedel pairs measured divided by the number that would be
 possible theoretically, ignoring centric projections and
 systematic absences.
;
 
_computing_data_collection        'APEX3 2012.4 (Bruker, 2012b)'
_computing_cell_refinement        'SAINT V8.27b (Bruker, 2012a)'
_computing_data_reduction         'SAINT V8.27b (Bruker, 2012a)'
_computing_structure_solution     'SHELXT 2014/5 (Sheldrick, 2014)'
_computing_structure_refinement   'SHELXL-2018/3 (Sheldrick, 2017)'
_computing_molecular_graphics     'DIAMOND (Brandenburg, 1999)'  
_computing_publication_material   'SHELXL-2018/3 (Sheldrick, 2015)'


#=============================================================================
# REFINEMENT DATA
#=============================================================================

_refine_special_details           ?
_refine_ls_structure_factor_coef  Fsqd
_refine_ls_matrix_type            full
_refine_ls_weighting_scheme       calc
_refine_ls_weighting_details
'w=1/[\s^2^(Fo^2^)+(0.1016P)^2^+6.1987P] where P=(Fo^2^+2Fc^2^)/3'
_atom_sites_solution_primary      ?
_atom_sites_solution_secondary    ?
_atom_sites_solution_hydrogens    mixed
_refine_ls_hydrogen_treatment     mixed
_refine_ls_extinction_method      none
_refine_ls_extinction_coef        .
_refine_ls_abs_structure_details
;
 Flack x determined using 2754 quotients [(I+)-(I-)]/[(I+)+(I-)]
 (Parsons, Flack and Wagner, Acta Cryst. B69 (2013) 249-259).
;
_refine_ls_abs_structure_Flack    0.9(4)
_chemical_absolute_configuration  rm
_refine_ls_number_reflns          7457
_refine_ls_number_parameters      501
_refine_ls_number_restraints      5
_refine_ls_R_factor_all           0.0712
_refine_ls_R_factor_gt            0.0650
_refine_ls_wR_factor_ref          0.1772
_refine_ls_wR_factor_gt           0.1702
_refine_ls_goodness_of_fit_ref    1.047
_refine_ls_restrained_S_all       1.047
_refine_ls_shift/su_max           0.000
_refine_ls_shift/su_mean          0.000
 
#=============================================================================
# ATOMIC COORDINATES AND DISPLACEMENT PARAMETERS
#============================================================================= 
 
loop_
 _atom_site_label
 _atom_site_type_symbol
 _atom_site_fract_x
 _atom_site_fract_y
 _atom_site_fract_z
 _atom_site_U_iso_or_equiv
 _atom_site_adp_type
 _atom_site_occupancy
 _atom_site_site_symmetry_order  
 _atom_site_calc_flag
 _atom_site_refinement_flags_posn
 _atom_site_refinement_flags_adp
 _atom_site_refinement_flags_occupancy
 _atom_site_disorder_assembly
 _atom_site_disorder_group
C1 C 0.6326(5) 0.8172(5) 0.4580(2) 0.0486(15) Uani 1 1 d . . . . .
H1A H 0.618963 0.869737 0.481068 0.073 Uiso 1 1 calc R U . . .
H1B H 0.625965 0.757771 0.476531 0.073 Uiso 1 1 calc R U . . .
H1C H 0.709614 0.822465 0.445000 0.073 Uiso 1 1 calc R U . . .
C2 C 0.5455(4) 0.8195(4) 0.41391(17) 0.0299(11) Uani 1 1 d . . . . .
C3 C 0.5484(4) 0.7512(3) 0.37621(17) 0.0256(10) Uani 1 1 d . . . . .
H3 H 0.607852 0.705754 0.378471 0.031 Uiso 1 1 calc R U . . .
C4 C 0.4562(4) 0.8847(3) 0.41025(18) 0.0281(11) Uani 1 1 d . . . . .
H4 H 0.452191 0.932918 0.435184 0.034 Uiso 1 1 calc R U . . .
C5 C 0.3739(4) 0.8800(3) 0.37098(16) 0.0238(10) Uani 1 1 d . . . . .
H5 H 0.313693 0.924916 0.369448 0.029 Uiso 1 1 calc R U . . .
C6 C 0.3769(4) 0.8103(3) 0.33319(16) 0.0214(9) Uani 1 1 d . . . . .
C7 C 0.4678(4) 0.7460(3) 0.33484(16) 0.0228(10) Uani 1 1 d . . . . .
C8 C 0.3777(4) 0.6159(3) 0.28734(16) 0.0235(10) Uani 1 1 d . . . . .
H8 H 0.405955 0.559428 0.269003 0.028 Uiso 1 1 calc R U . . .
C9 C 0.2899(4) 0.6611(3) 0.25208(16) 0.0216(9) Uani 1 1 d . . . . .
C10 C 0.2542(4) 0.7523(3) 0.25703(15) 0.0194(9) Uani 1 1 d . . . . .
C11 C 0.1658(4) 0.7946(3) 0.21928(17) 0.0243(10) Uani 1 1 d . . . . .
H11A H 0.206150 0.828223 0.192357 0.029 Uiso 1 1 calc R U . . .
H11B H 0.119820 0.841284 0.237401 0.029 Uiso 1 1 calc R U . . .
C12 C 0.2466(4) 0.6043(4) 0.21004(17) 0.0261(11) Uani 1 1 d . . . . .
C13 C 0.1574(4) 0.6460(4) 0.17189(19) 0.0298(11) Uani 1 1 d . . . . .
H13A H 0.197280 0.672119 0.142543 0.036 Uiso 1 1 calc R U . . .
H13B H 0.106645 0.594869 0.158751 0.036 Uiso 1 1 calc R U . . .
C14 C 0.0847(4) 0.7220(3) 0.19382(17) 0.0250(10) Uani 1 1 d . . . . .
C15 C 0.0055(4) 0.6813(4) 0.2325(2) 0.0334(12) Uani 1 1 d . . . . .
H15A H -0.041038 0.731656 0.246297 0.050 Uiso 1 1 calc R U . . .
H15B H -0.044704 0.634287 0.215697 0.050 Uiso 1 1 calc R U . . .
H15C H 0.051180 0.651536 0.260328 0.050 Uiso 1 1 calc R U . . .
C16 C 0.0108(5) 0.7702(4) 0.1514(2) 0.0377(13) Uani 1 1 d . . . . .
H16A H -0.035831 0.819373 0.166378 0.057 Uiso 1 1 calc R U . . .
H16B H 0.060498 0.798373 0.126439 0.057 Uiso 1 1 calc R U . . .
H16C H -0.039461 0.723659 0.134269 0.057 Uiso 1 1 calc R U . . .
C17 C 0.3337(4) 0.5807(3) 0.33728(18) 0.0248(10) Uani 1 1 d . . . . .
C18 C 0.2305(4) 0.6003(4) 0.35429(17) 0.0299(11) Uani 1 1 d . . . . .
H18 H 0.178763 0.634784 0.332414 0.036 Uiso 1 1 calc R U . . .
C19 C 0.4194(4) 0.5223(4) 0.3693(2) 0.0391(13) Uani 1 1 d . . . . .
H19A H 0.482528 0.563480 0.382312 0.047 Uiso 1 1 calc R U . . .
H19B H 0.452627 0.473707 0.347388 0.047 Uiso 1 1 calc R U . . .
C20 C 0.3647(5) 0.4744(4) 0.4147(2) 0.0509(14) Uani 1 1 d . . . . .
H20A H 0.425195 0.449824 0.438820 0.061 Uiso 1 1 calc R U . . .
H20B H 0.316742 0.420951 0.402398 0.061 Uiso 1 1 calc R U . . .
C21 C 0.1909(4) 0.5716(4) 0.40548(18) 0.0366(12) Uani 1 1 d . . . . .
H21A H 0.139003 0.516909 0.401306 0.044 Uiso 1 1 calc R U . . .
H21B H 0.147150 0.623825 0.420140 0.044 Uiso 1 1 calc R U . . .
C22 C 0.2905(4) 0.5460(4) 0.44216(17) 0.0414(11) Uani 1 1 d . . . . .
H22 H 0.337622 0.604037 0.447836 0.050 Uiso 1 1 calc R U . . .
C23 C 0.2547(6) 0.5132(5) 0.4937(2) 0.0596(17) Uani 1 1 d . . . . .
C24 C 0.3235(8) 0.5317(7) 0.5354(4) 0.104(3) Uiso 1 1 d . . . . .
H24A H 0.311847 0.499956 0.566619 0.125 Uiso 1 1 calc R U . . .
H24B H 0.383419 0.576406 0.533420 0.125 Uiso 1 1 calc R U . . .
C25 C 0.1641(13) 0.4460(11) 0.4962(5) 0.165(5) Uiso 1 1 d . . . . .
H25A H 0.143562 0.438362 0.531853 0.247 Uiso 1 1 calc R U . . .
H25B H 0.189535 0.385501 0.482914 0.247 Uiso 1 1 calc R U . . .
H25C H 0.097226 0.468018 0.475679 0.247 Uiso 1 1 calc R U . . .
C26 C 0.3666(5) 0.3032(5) 0.0418(2) 0.0446(14) Uani 1 1 d . . . . .
H26A H 0.381960 0.252112 0.017924 0.067 Uiso 1 1 calc R U . . .
H26B H 0.290658 0.294419 0.055373 0.067 Uiso 1 1 calc R U . . .
H26C H 0.369022 0.363486 0.023770 0.067 Uiso 1 1 calc R U . . .
C27 C 0.4565(4) 0.3025(4) 0.08538(17) 0.0297(11) Uani 1 1 d . . . . .
C28 C 0.5464(4) 0.2383(4) 0.08816(17) 0.0278(10) Uani 1 1 d . . . . .
H28 H 0.551954 0.191765 0.062366 0.033 Uiso 1 1 calc R U . . .
C29 C 0.6276(4) 0.2417(3) 0.12807(16) 0.0222(9) Uani 1 1 d . . . . .
H29 H 0.687970 0.196920 0.129492 0.027 Uiso 1 1 calc R U . . .
C30 C 0.6229(4) 0.3092(3) 0.16623(16) 0.0198(9) Uani 1 1 d . . . . .
C31 C 0.5321(4) 0.3737(3) 0.16403(17) 0.0220(10) Uani 1 1 d . . . . .
C32 C 0.4514(4) 0.3689(4) 0.12367(18) 0.0288(11) Uani 1 1 d . . . . .
H32 H 0.390280 0.412956 0.122274 0.035 Uiso 1 1 calc R U . . .
C33 C 0.6216(4) 0.5045(3) 0.21111(17) 0.0235(10) Uani 1 1 d . . . . .
H33 H 0.592926 0.561338 0.228981 0.028 Uiso 1 1 calc R U . . .
C34 C 0.7100(4) 0.4594(3) 0.24738(17) 0.0228(10) Uani 1 1 d . . . . .
C35 C 0.7450(4) 0.3673(3) 0.24349(17) 0.0225(10) Uani 1 1 d . . . . .
C36 C 0.8286(4) 0.3232(3) 0.28211(17) 0.0255(10) Uani 1 1 d . . . . .
H36A H 0.874330 0.275390 0.264699 0.031 Uiso 1 1 calc R U . . .
H36B H 0.785163 0.290699 0.308440 0.031 Uiso 1 1 calc R U . . .
C37 C 0.8369(5) 0.4756(4) 0.32820(19) 0.0327(12) Uani 1 1 d . . . . .
H37A H 0.794260 0.452371 0.357451 0.039 Uiso 1 1 calc R U . . .
H37B H 0.888446 0.526390 0.341051 0.039 Uiso 1 1 calc R U . . .
C38 C 0.9105(4) 0.3948(3) 0.30860(18) 0.0272(11) Uani 1 1 d . . . . .
C39 C 0.7530(4) 0.5163(3) 0.28924(17) 0.0244(10) Uani 1 1 d . . . . .
C40 C 0.9970(4) 0.4310(4) 0.2709(2) 0.0363(12) Uani 1 1 d . . . . .
H40A H 0.956013 0.460888 0.241743 0.055 Uiso 1 1 calc R U . . .
H40B H 1.048043 0.476870 0.288091 0.055 Uiso 1 1 calc R U . . .
H40C H 1.042331 0.378192 0.258781 0.055 Uiso 1 1 calc R U . . .
C41 C 0.9774(5) 0.3484(4) 0.3537(2) 0.0408(14) Uani 1 1 d . . . . .
H41A H 0.923673 0.324761 0.378281 0.061 Uiso 1 1 calc R U . . .
H41B H 1.022827 0.296075 0.341146 0.061 Uiso 1 1 calc R U . . .
H41C H 1.028539 0.394752 0.370456 0.061 Uiso 1 1 calc R U . . .
C42 C 0.6649(4) 0.5385(3) 0.16036(18) 0.0258(10) Uani 1 1 d . . . . .
C43 C 0.7691(4) 0.5205(3) 0.14453(18) 0.0273(10) Uani 1 1 d . . . . .
H43 H 0.819532 0.484177 0.166098 0.033 Uiso 1 1 calc R U . . .
C44 C 0.5803(4) 0.5960(4) 0.12895(19) 0.0367(12) Uani 1 1 d . . . . .
H44A H 0.576143 0.659747 0.143862 0.044 Uiso 1 1 calc R U . . .
H44B H 0.503553 0.566959 0.130424 0.044 Uiso 1 1 calc R U . . .
C45 C 0.6115(5) 0.6040(4) 0.0734(2) 0.0486(14) Uani 1 1 d . . . . .
H45A H 0.596440 0.543252 0.055928 0.058 Uiso 1 1 calc R U . . .
H45B H 0.562697 0.652316 0.056089 0.058 Uiso 1 1 calc R U . . .
C46 C 0.8118(5) 0.5544(4) 0.09430(18) 0.0370(12) Uani 1 1 d . . . . .
H46A H 0.816203 0.500321 0.070705 0.044 Uiso 1 1 calc R U . . .
H46B H 0.890134 0.579806 0.100104 0.044 Uiso 1 1 calc R U . . .
C47 C 0.7358(5) 0.6301(4) 0.0691(2) 0.0489(13) Uani 1 1 d . . . . .
H47 H 0.749408 0.689654 0.088660 0.059 Uiso 1 1 calc R U . . .
C48 C 0.7681(6) 0.6477(7) 0.0151(3) 0.082(3) Uani 1 1 d . . . . .
C49 C 0.8315(14) 0.7301(13) 0.0112(6) 0.186(6) Uiso 1 1 d . . . . .
H49A H 0.853926 0.751139 -0.021276 0.223 Uiso 1 1 calc R U . . .
H49B H 0.852435 0.765154 0.041067 0.223 Uiso 1 1 calc R U . . .
C50 C 0.7306(9) 0.5879(8) -0.0266(4) 0.107(3) Uiso 1 1 d . . . . .
H50A H 0.760307 0.524256 -0.020590 0.161 Uiso 1 1 calc R U . . .
H50B H 0.759178 0.612400 -0.058558 0.161 Uiso 1 1 calc R U . . .
H50C H 0.646733 0.586157 -0.029014 0.161 Uiso 1 1 calc R U . . .
N1 N 0.4792(3) 0.6784(3) 0.29690(15) 0.0248(9) Uani 1 1 d D . . . .
H1N H 0.546(2) 0.649(3) 0.2985(18) 0.030 Uiso 1 1 d D U . . .
N2 N 0.2907(3) 0.8145(3) 0.29328(14) 0.0214(8) Uani 1 1 d D . . . .
H2N H 0.262(4) 0.8714(16) 0.2919(18) 0.026 Uiso 1 1 d D U . . .
N3 N 0.7076(3) 0.3047(3) 0.20690(13) 0.0208(8) Uani 1 1 d D . . . .
H3N H 0.751(3) 0.254(2) 0.2066(18) 0.025 Uiso 1 1 d D U . . .
N4 N 0.5220(3) 0.4406(3) 0.20314(15) 0.0247(9) Uani 1 1 d D . . . .
H4N H 0.460(3) 0.474(3) 0.1957(17) 0.030 Uiso 1 1 d D U . . .
O1 O 0.2817(3) 0.5228(2) 0.20245(14) 0.0326(8) Uani 1 1 d . . . . .
O2 O 0.7200(3) 0.5983(2) 0.29552(13) 0.0330(8) Uani 1 1 d . . . . .
 
loop_
 _atom_site_aniso_label
 _atom_site_aniso_U_11
 _atom_site_aniso_U_22
 _atom_site_aniso_U_33
 _atom_site_aniso_U_23
 _atom_site_aniso_U_13
 _atom_site_aniso_U_12
C1 0.040(3) 0.057(4) 0.047(3) -0.001(3) -0.019(3) 0.007(3)
C2 0.027(2) 0.038(3) 0.024(2) -0.001(2) -0.0044(19) -0.005(2)
C3 0.019(2) 0.030(3) 0.028(2) 0.005(2) 0.0005(18) 0.004(2)
C4 0.029(2) 0.028(3) 0.027(2) -0.002(2) -0.0019(19) -0.001(2)
C5 0.025(2) 0.022(3) 0.024(2) -0.0002(19) 0.0033(18) -0.0033(19)
C6 0.018(2) 0.026(2) 0.020(2) 0.001(2) 0.0009(17) -0.002(2)
C7 0.020(2) 0.025(3) 0.024(2) -0.0026(19) 0.0039(18) -0.002(2)
C8 0.025(2) 0.021(3) 0.024(2) 0.0018(19) 0.0019(17) 0.0046(19)
C9 0.020(2) 0.022(2) 0.023(2) 0.0012(19) 0.0055(18) 0.0005(19)
C10 0.020(2) 0.024(2) 0.0144(19) 0.0004(18) 0.0020(16) -0.0025(19)
C11 0.025(2) 0.020(2) 0.028(2) 0.0020(19) -0.0052(18) 0.0038(19)
C12 0.021(2) 0.029(3) 0.028(2) -0.005(2) 0.0019(18) 0.000(2)
C13 0.028(2) 0.028(3) 0.033(2) -0.006(2) -0.006(2) 0.004(2)
C14 0.023(2) 0.023(2) 0.029(2) -0.0033(19) -0.0077(18) 0.0013(19)
C15 0.022(2) 0.033(3) 0.046(3) -0.001(2) 0.000(2) -0.003(2)
C16 0.044(3) 0.032(3) 0.036(3) 0.004(2) -0.021(2) -0.007(2)
C17 0.025(2) 0.020(3) 0.030(2) -0.0026(19) 0.0042(19) 0.0018(18)
C18 0.031(2) 0.032(3) 0.026(2) 0.001(2) -0.0001(19) -0.005(2)
C19 0.035(3) 0.039(3) 0.043(3) 0.021(3) 0.004(2) 0.004(2)
C20 0.053(3) 0.050(3) 0.050(3) 0.026(3) 0.006(2) 0.013(3)
C21 0.035(3) 0.042(3) 0.034(3) -0.001(2) 0.008(2) 0.005(2)
C22 0.049(3) 0.043(3) 0.032(2) -0.001(2) 0.003(2) -0.006(2)
C23 0.067(4) 0.074(5) 0.038(3) 0.007(3) -0.003(3) -0.018(3)
C26 0.046(3) 0.051(4) 0.035(3) -0.012(3) -0.007(2) 0.004(3)
C27 0.026(2) 0.035(3) 0.028(2) 0.001(2) -0.0005(19) 0.001(2)
C28 0.027(2) 0.033(3) 0.023(2) -0.004(2) 0.0028(17) -0.005(2)
C29 0.018(2) 0.022(2) 0.027(2) 0.0003(19) 0.0029(17) 0.0023(19)
C30 0.017(2) 0.019(2) 0.023(2) 0.0007(19) 0.0023(17) -0.0040(18)
C31 0.018(2) 0.024(2) 0.025(2) 0.0039(19) 0.0030(17) -0.0001(19)
C32 0.022(2) 0.032(3) 0.032(2) 0.001(2) -0.0006(19) 0.002(2)
C33 0.020(2) 0.019(2) 0.032(2) -0.008(2) 0.0014(18) 0.0042(18)
C34 0.021(2) 0.023(2) 0.025(2) -0.0085(19) -0.0002(18) 0.0025(19)
C35 0.016(2) 0.021(2) 0.030(2) -0.002(2) 0.0040(17) -0.0005(19)
C36 0.029(2) 0.021(2) 0.026(2) -0.0044(19) -0.0030(18) -0.004(2)
C37 0.038(3) 0.034(3) 0.025(2) -0.012(2) -0.005(2) 0.001(2)
C38 0.030(3) 0.022(3) 0.029(2) -0.0005(19) -0.004(2) -0.001(2)
C39 0.022(2) 0.020(2) 0.032(2) -0.007(2) 0.0063(18) 0.0021(19)
C40 0.028(3) 0.031(3) 0.049(3) 0.002(2) 0.000(2) 0.005(2)
C41 0.048(3) 0.024(3) 0.048(3) -0.008(2) -0.021(2) 0.006(2)
C42 0.031(2) 0.017(2) 0.029(2) -0.0003(19) -0.0068(19) -0.0016(19)
C43 0.026(2) 0.023(2) 0.033(2) 0.000(2) -0.0011(19) 0.006(2)
C44 0.035(3) 0.029(3) 0.045(3) -0.001(2) -0.007(2) 0.011(2)
C45 0.049(3) 0.051(3) 0.045(3) 0.020(3) -0.008(2) 0.002(3)
C46 0.044(3) 0.035(3) 0.033(3) 0.003(2) 0.007(2) -0.006(2)
C47 0.055(3) 0.044(3) 0.048(3) 0.018(2) -0.003(2) 0.004(2)
C48 0.064(4) 0.103(6) 0.077(5) 0.054(5) 0.000(3) -0.021(4)
N1 0.020(2) 0.026(2) 0.029(2) -0.0049(17) 0.0030(16) 0.0057(16)
N2 0.019(2) 0.019(2) 0.0256(18) -0.0012(17) -0.0017(15) 0.0019(16)
N3 0.021(2) 0.018(2) 0.0235(18) -0.0030(16) 0.0015(15) 0.0023(16)
N4 0.0151(19) 0.025(2) 0.034(2) -0.0015(18) -0.0003(16) 0.0044(16)
O1 0.0253(17) 0.0252(19) 0.047(2) -0.0157(16) -0.0026(14) 0.0059(15)
O2 0.0296(18) 0.0253(19) 0.0439(19) -0.0114(17) -0.0016(14) 0.0035(15)
 
_geom_special_details
;
 All esds (except the esd in the dihedral angle between two l.s. planes)
 are estimated using the full covariance matrix.  The cell esds are taken
 into account individually in the estimation of esds in distances, angles
 and torsion angles; correlations between esds in cell parameters are only
 used when they are defined by crystal symmetry.  An approximate (isotropic)
 treatment of cell esds is used for estimating esds involving l.s. planes.
;
 
loop_
 _geom_bond_atom_site_label_1
 _geom_bond_atom_site_label_2
 _geom_bond_distance
 _geom_bond_site_symmetry_2
 _geom_bond_publ_flag
C1 C2 1.503(6) . ?
C1 H1A 0.9800 . ?
C1 H1B 0.9800 . ?
C1 H1C 0.9800 . ?
C2 C3 1.386(7) . ?
C2 C4 1.397(7) . ?
C3 C7 1.404(6) . ?
C3 H3 0.9500 . ?
C4 C5 1.377(6) . ?
C4 H4 0.9500 . ?
C5 C6 1.403(6) . ?
C5 H5 0.9500 . ?
C6 C7 1.401(6) . ?
C6 N2 1.419(5) . ?
C7 N1 1.393(6) . ?
C8 C9 1.494(6) . ?
C8 N1 1.495(6) . ?
C8 C17 1.513(6) . ?
C8 H8 1.0000 . ?
C9 C10 1.371(7) . ?
C9 C12 1.439(6) . ?
C10 N2 1.353(6) . ?
C10 C11 1.521(6) . ?
C11 C14 1.534(6) . ?
C11 H11A 0.9900 . ?
C11 H11B 0.9900 . ?
C12 O1 1.249(6) . ?
C12 C13 1.530(6) . ?
C13 C14 1.506(7) . ?
C13 H13A 0.9900 . ?
C13 H13B 0.9900 . ?
C14 C15 1.518(7) . ?
C14 C16 1.537(6) . ?
C15 H15A 0.9800 . ?
C15 H15B 0.9800 . ?
C15 H15C 0.9800 . ?
C16 H16A 0.9800 . ?
C16 H16B 0.9800 . ?
C16 H16C 0.9800 . ?
C17 C18 1.335(6) . ?
C17 C19 1.524(6) . ?
C18 C21 1.495(6) . ?
C18 H18 0.9500 . ?
C19 C20 1.536(7) . ?
C19 H19A 0.9900 . ?
C19 H19B 0.9900 . ?
C20 C22 1.538(8) . ?
C20 H20A 0.9900 . ?
C20 H20B 0.9900 . ?
C21 C22 1.518(7) . ?
C21 H21A 0.9900 . ?
C21 H21B 0.9900 . ?
C22 C23 1.505(7) . ?
C22 H22 1.0000 . ?
C23 C24 1.352(10) . ?
C23 C25 1.431(16) . ?
C24 H24A 0.9500 . ?
C24 H24B 0.9500 . ?
C25 H25A 0.9800 . ?
C25 H25B 0.9800 . ?
C25 H25C 0.9800 . ?
C26 C27 1.516(6) . ?
C26 H26A 0.9800 . ?
C26 H26B 0.9800 . ?
C26 H26C 0.9800 . ?
C27 C32 1.382(7) . ?
C27 C28 1.392(7) . ?
C28 C29 1.380(6) . ?
C28 H28 0.9500 . ?
C29 C30 1.389(6) . ?
C29 H29 0.9500 . ?
C30 C31 1.403(6) . ?
C30 N3 1.421(5) . ?
C31 C32 1.385(6) . ?
C31 N4 1.407(6) . ?
C32 H32 0.9500 . ?
C33 N4 1.484(6) . ?
C33 C34 1.514(6) . ?
C33 C42 1.523(7) . ?
C33 H33 1.0000 . ?
C34 C35 1.378(7) . ?
C34 C39 1.435(6) . ?
C35 N3 1.366(6) . ?
C35 C36 1.510(6) . ?
C36 C38 1.541(6) . ?
C36 H36A 0.9900 . ?
C36 H36B 0.9900 . ?
C37 C39 1.498(7) . ?
C37 C38 1.539(7) . ?
C37 H37A 0.9900 . ?
C37 H37B 0.9900 . ?
C38 C40 1.535(7) . ?
C38 C41 1.535(6) . ?
C39 O2 1.243(6) . ?
C40 H40A 0.9800 . ?
C40 H40B 0.9800 . ?
C40 H40C 0.9800 . ?
C41 H41A 0.9800 . ?
C41 H41B 0.9800 . ?
C41 H41C 0.9800 . ?
C42 C43 1.331(6) . ?
C42 C44 1.499(6) . ?
C43 C46 1.507(7) . ?
C43 H43 0.9500 . ?
C44 C45 1.520(7) . ?
C44 H44A 0.9900 . ?
C44 H44B 0.9900 . ?
C45 C47 1.510(8) . ?
C45 H45A 0.9900 . ?
C45 H45B 0.9900 . ?
C46 C47 1.527(7) . ?
C46 H46A 0.9900 . ?
C46 H46B 0.9900 . ?
C47 C48 1.502(9) . ?
C47 H47 1.0000 . ?
C48 C49 1.393(18) . ?
C48 C50 1.436(13) . ?
C49 H49A 0.9500 . ?
C49 H49B 0.9500 . ?
C50 H50A 0.9800 . ?
C50 H50B 0.9800 . ?
C50 H50C 0.9800 . ?
N1 H1N 0.883(14) . ?
N2 H2N 0.877(14) . ?
N3 H3N 0.884(14) . ?
N4 H4N 0.877(14) . ?
 
loop_
 _geom_angle_atom_site_label_1
 _geom_angle_atom_site_label_2
 _geom_angle_atom_site_label_3
 _geom_angle
 _geom_angle_site_symmetry_1
 _geom_angle_site_symmetry_3
 _geom_angle_publ_flag
C2 C1 H1A 109.5 . . ?
C2 C1 H1B 109.5 . . ?
H1A C1 H1B 109.5 . . ?
C2 C1 H1C 109.5 . . ?
H1A C1 H1C 109.5 . . ?
H1B C1 H1C 109.5 . . ?
C3 C2 C4 117.3(4) . . ?
C3 C2 C1 119.5(5) . . ?
C4 C2 C1 123.0(5) . . ?
C2 C3 C7 123.3(4) . . ?
C2 C3 H3 118.4 . . ?
C7 C3 H3 118.4 . . ?
C5 C4 C2 120.9(4) . . ?
C5 C4 H4 119.6 . . ?
C2 C4 H4 119.6 . . ?
C4 C5 C6 121.4(4) . . ?
C4 C5 H5 119.3 . . ?
C6 C5 H5 119.3 . . ?
C7 C6 C5 119.0(4) . . ?
C7 C6 N2 124.2(4) . . ?
C5 C6 N2 116.7(4) . . ?
N1 C7 C6 121.8(4) . . ?
N1 C7 C3 120.2(4) . . ?
C6 C7 C3 118.0(4) . . ?
C9 C8 N1 111.4(4) . . ?
C9 C8 C17 115.1(4) . . ?
N1 C8 C17 110.6(4) . . ?
C9 C8 H8 106.4 . . ?
N1 C8 H8 106.4 . . ?
C17 C8 H8 106.4 . . ?
C10 C9 C12 120.4(4) . . ?
C10 C9 C8 123.5(4) . . ?
C12 C9 C8 116.0(4) . . ?
N2 C10 C9 126.8(4) . . ?
N2 C10 C11 112.3(4) . . ?
C9 C10 C11 120.9(4) . . ?
C10 C11 C14 113.8(4) . . ?
C10 C11 H11A 108.8 . . ?
C14 C11 H11A 108.8 . . ?
C10 C11 H11B 108.8 . . ?
C14 C11 H11B 108.8 . . ?
H11A C11 H11B 107.7 . . ?
O1 C12 C9 122.4(4) . . ?
O1 C12 C13 118.4(4) . . ?
C9 C12 C13 119.1(4) . . ?
C14 C13 C12 114.2(4) . . ?
C14 C13 H13A 108.7 . . ?
C12 C13 H13A 108.7 . . ?
C14 C13 H13B 108.7 . . ?
C12 C13 H13B 108.7 . . ?
H13A C13 H13B 107.6 . . ?
C13 C14 C15 110.6(4) . . ?
C13 C14 C11 107.5(4) . . ?
C15 C14 C11 110.6(4) . . ?
C13 C14 C16 110.7(4) . . ?
C15 C14 C16 108.2(4) . . ?
C11 C14 C16 109.2(4) . . ?
C14 C15 H15A 109.5 . . ?
C14 C15 H15B 109.5 . . ?
H15A C15 H15B 109.5 . . ?
C14 C15 H15C 109.5 . . ?
H15A C15 H15C 109.5 . . ?
H15B C15 H15C 109.5 . . ?
C14 C16 H16A 109.5 . . ?
C14 C16 H16B 109.5 . . ?
H16A C16 H16B 109.5 . . ?
C14 C16 H16C 109.5 . . ?
H16A C16 H16C 109.5 . . ?
H16B C16 H16C 109.5 . . ?
C18 C17 C8 124.7(4) . . ?
C18 C17 C19 120.8(4) . . ?
C8 C17 C19 114.5(4) . . ?
C17 C18 C21 124.3(5) . . ?
C17 C18 H18 117.8 . . ?
C21 C18 H18 117.8 . . ?
C17 C19 C20 112.4(4) . . ?
C17 C19 H19A 109.1 . . ?
C20 C19 H19A 109.1 . . ?
C17 C19 H19B 109.1 . . ?
C20 C19 H19B 109.1 . . ?
H19A C19 H19B 107.9 . . ?
C19 C20 C22 109.4(5) . . ?
C19 C20 H20A 109.8 . . ?
C22 C20 H20A 109.8 . . ?
C19 C20 H20B 109.8 . . ?
C22 C20 H20B 109.8 . . ?
H20A C20 H20B 108.2 . . ?
C18 C21 C22 111.9(4) . . ?
C18 C21 H21A 109.2 . . ?
C22 C21 H21A 109.2 . . ?
C18 C21 H21B 109.2 . . ?
C22 C21 H21B 109.2 . . ?
H21A C21 H21B 107.9 . . ?
C23 C22 C21 113.8(4) . . ?
C23 C22 C20 113.5(5) . . ?
C21 C22 C20 107.2(4) . . ?
C23 C22 H22 107.3 . . ?
C21 C22 H22 107.3 . . ?
C20 C22 H22 107.3 . . ?
C24 C23 C25 120.4(9) . . ?
C24 C23 C22 118.9(7) . . ?
C25 C23 C22 119.1(7) . . ?
C23 C24 H24A 120.0 . . ?
C23 C24 H24B 120.0 . . ?
H24A C24 H24B 120.0 . . ?
C23 C25 H25A 109.5 . . ?
C23 C25 H25B 109.5 . . ?
H25A C25 H25B 109.5 . . ?
C23 C25 H25C 109.5 . . ?
H25A C25 H25C 109.5 . . ?
H25B C25 H25C 109.5 . . ?
C27 C26 H26A 109.5 . . ?
C27 C26 H26B 109.5 . . ?
H26A C26 H26B 109.5 . . ?
C27 C26 H26C 109.5 . . ?
H26A C26 H26C 109.5 . . ?
H26B C26 H26C 109.5 . . ?
C32 C27 C28 118.0(4) . . ?
C32 C27 C26 119.3(4) . . ?
C28 C27 C26 122.7(4) . . ?
C29 C28 C27 120.5(4) . . ?
C29 C28 H28 119.7 . . ?
C27 C28 H28 119.7 . . ?
C28 C29 C30 121.4(4) . . ?
C28 C29 H29 119.3 . . ?
C30 C29 H29 119.3 . . ?
C29 C30 C31 118.6(4) . . ?
C29 C30 N3 117.3(4) . . ?
C31 C30 N3 124.0(4) . . ?
C32 C31 C30 119.1(4) . . ?
C32 C31 N4 120.7(4) . . ?
C30 C31 N4 120.1(4) . . ?
C27 C32 C31 122.4(5) . . ?
C27 C32 H32 118.8 . . ?
C31 C32 H32 118.8 . . ?
N4 C33 C34 109.7(4) . . ?
N4 C33 C42 111.2(4) . . ?
C34 C33 C42 115.9(4) . . ?
N4 C33 H33 106.5 . . ?
C34 C33 H33 106.5 . . ?
C42 C33 H33 106.5 . . ?
C35 C34 C39 119.9(4) . . ?
C35 C34 C33 123.6(4) . . ?
C39 C34 C33 116.4(4) . . ?
N3 C35 C34 125.9(4) . . ?
N3 C35 C36 112.0(4) . . ?
C34 C35 C36 122.1(4) . . ?
C35 C36 C38 113.3(4) . . ?
C35 C36 H36A 108.9 . . ?
C38 C36 H36A 108.9 . . ?
C35 C36 H36B 108.9 . . ?
C38 C36 H36B 108.9 . . ?
H36A C36 H36B 107.7 . . ?
C39 C37 C38 114.9(4) . . ?
C39 C37 H37A 108.6 . . ?
C38 C37 H37A 108.6 . . ?
C39 C37 H37B 108.6 . . ?
C38 C37 H37B 108.6 . . ?
H37A C37 H37B 107.5 . . ?
C40 C38 C41 108.1(4) . . ?
C40 C38 C37 111.1(4) . . ?
C41 C38 C37 109.7(4) . . ?
C40 C38 C36 110.3(4) . . ?
C41 C38 C36 110.2(4) . . ?
C37 C38 C36 107.4(4) . . ?
O2 C39 C34 122.1(4) . . ?
O2 C39 C37 118.0(4) . . ?
C34 C39 C37 119.8(4) . . ?
C38 C40 H40A 109.5 . . ?
C38 C40 H40B 109.5 . . ?
H40A C40 H40B 109.5 . . ?
C38 C40 H40C 109.5 . . ?
H40A C40 H40C 109.5 . . ?
H40B C40 H40C 109.5 . . ?
C38 C41 H41A 109.5 . . ?
C38 C41 H41B 109.5 . . ?
H41A C41 H41B 109.5 . . ?
C38 C41 H41C 109.5 . . ?
H41A C41 H41C 109.5 . . ?
H41B C41 H41C 109.5 . . ?
C43 C42 C44 121.6(4) . . ?
C43 C42 C33 123.8(4) . . ?
C44 C42 C33 114.5(4) . . ?
C42 C43 C46 123.7(4) . . ?
C42 C43 H43 118.1 . . ?
C46 C43 H43 118.1 . . ?
C42 C44 C45 112.6(4) . . ?
C42 C44 H44A 109.1 . . ?
C45 C44 H44A 109.1 . . ?
C42 C44 H44B 109.1 . . ?
C45 C44 H44B 109.1 . . ?
H44A C44 H44B 107.8 . . ?
C47 C45 C44 111.4(4) . . ?
C47 C45 H45A 109.3 . . ?
C44 C45 H45A 109.3 . . ?
C47 C45 H45B 109.3 . . ?
C44 C45 H45B 109.3 . . ?
H45A C45 H45B 108.0 . . ?
C43 C46 C47 113.2(4) . . ?
C43 C46 H46A 108.9 . . ?
C47 C46 H46A 108.9 . . ?
C43 C46 H46B 108.9 . . ?
C47 C46 H46B 108.9 . . ?
H46A C46 H46B 107.7 . . ?
C48 C47 C45 113.4(5) . . ?
C48 C47 C46 111.1(5) . . ?
C45 C47 C46 109.7(4) . . ?
C48 C47 H47 107.5 . . ?
C45 C47 H47 107.5 . . ?
C46 C47 H47 107.5 . . ?
C49 C48 C50 126.1(10) . . ?
C49 C48 C47 111.5(10) . . ?
C50 C48 C47 122.3(7) . . ?
C48 C49 H49A 120.0 . . ?
C48 C49 H49B 120.0 . . ?
H49A C49 H49B 120.0 . . ?
C48 C50 H50A 109.5 . . ?
C48 C50 H50B 109.5 . . ?
H50A C50 H50B 109.5 . . ?
C48 C50 H50C 109.5 . . ?
H50A C50 H50C 109.5 . . ?
H50B C50 H50C 109.5 . . ?
C7 N1 C8 115.4(4) . . ?
C7 N1 H1N 114(3) . . ?
C8 N1 H1N 115(3) . . ?
C10 N2 C6 132.8(4) . . ?
C10 N2 H2N 118(3) . . ?
C6 N2 H2N 109(3) . . ?
C35 N3 C30 133.3(4) . . ?
C35 N3 H3N 112(3) . . ?
C30 N3 H3N 114(3) . . ?
C31 N4 C33 115.2(4) . . ?
C31 N4 H4N 107(3) . . ?
C33 N4 H4N 110(3) . . ?
 
loop_
 _geom_torsion_atom_site_label_1
 _geom_torsion_atom_site_label_2
 _geom_torsion_atom_site_label_3
 _geom_torsion_atom_site_label_4
 _geom_torsion
 _geom_torsion_site_symmetry_1
 _geom_torsion_site_symmetry_2
 _geom_torsion_site_symmetry_3
 _geom_torsion_site_symmetry_4
 _geom_torsion_publ_flag
C4 C2 C3 C7 1.0(7) . . . . ?
C1 C2 C3 C7 177.5(5) . . . . ?
C3 C2 C4 C5 0.8(7) . . . . ?
C1 C2 C4 C5 -175.5(5) . . . . ?
C2 C4 C5 C6 -0.4(7) . . . . ?
C4 C5 C6 C7 -1.9(7) . . . . ?
C4 C5 C6 N2 -177.3(4) . . . . ?
C5 C6 C7 N1 -176.4(4) . . . . ?
N2 C6 C7 N1 -1.3(7) . . . . ?
C5 C6 C7 C3 3.6(7) . . . . ?
N2 C6 C7 C3 178.7(4) . . . . ?
C2 C3 C7 N1 176.7(4) . . . . ?
C2 C3 C7 C6 -3.3(7) . . . . ?
N1 C8 C9 C10 -46.1(6) . . . . ?
C17 C8 C9 C10 80.8(6) . . . . ?
N1 C8 C9 C12 131.2(4) . . . . ?
C17 C8 C9 C12 -101.8(5) . . . . ?
C12 C9 C10 N2 -177.3(4) . . . . ?
C8 C9 C10 N2 -0.1(7) . . . . ?
C12 C9 C10 C11 1.8(6) . . . . ?
C8 C9 C10 C11 179.0(4) . . . . ?
N2 C10 C11 C14 -154.1(4) . . . . ?
C9 C10 C11 C14 26.7(6) . . . . ?
C10 C9 C12 O1 175.7(4) . . . . ?
C8 C9 C12 O1 -1.7(6) . . . . ?
C10 C9 C12 C13 -1.9(6) . . . . ?
C8 C9 C12 C13 -179.3(4) . . . . ?
O1 C12 C13 C14 155.2(4) . . . . ?
C9 C12 C13 C14 -27.1(6) . . . . ?
C12 C13 C14 C15 -68.8(5) . . . . ?
C12 C13 C14 C11 52.1(6) . . . . ?
C12 C13 C14 C16 171.3(4) . . . . ?
C10 C11 C14 C13 -52.0(5) . . . . ?
C10 C11 C14 C15 68.8(5) . . . . ?
C10 C11 C14 C16 -172.2(4) . . . . ?
C9 C8 C17 C18 -11.0(7) . . . . ?
N1 C8 C17 C18 116.4(5) . . . . ?
C9 C8 C17 C19 171.5(4) . . . . ?
N1 C8 C17 C19 -61.2(5) . . . . ?
C8 C17 C18 C21 -175.0(5) . . . . ?
C19 C17 C18 C21 2.5(8) . . . . ?
C18 C17 C19 C20 12.1(7) . . . . ?
C8 C17 C19 C20 -170.2(5) . . . . ?
C17 C19 C20 C22 -46.4(7) . . . . ?
C17 C18 C21 C22 18.3(8) . . . . ?
C18 C21 C22 C23 -177.9(5) . . . . ?
C18 C21 C22 C20 -51.4(6) . . . . ?
C19 C20 C22 C23 -166.9(5) . . . . ?
C19 C20 C22 C21 66.5(6) . . . . ?
C21 C22 C23 C24 -148.0(7) . . . . ?
C20 C22 C23 C24 89.0(9) . . . . ?
C21 C22 C23 C25 46.1(11) . . . . ?
C20 C22 C23 C25 -76.9(10) . . . . ?
C32 C27 C28 C29 -0.1(7) . . . . ?
C26 C27 C28 C29 178.6(5) . . . . ?
C27 C28 C29 C30 -0.6(7) . . . . ?
C28 C29 C30 C31 1.1(7) . . . . ?
C28 C29 C30 N3 177.4(4) . . . . ?
C29 C30 C31 C32 -1.0(7) . . . . ?
N3 C30 C31 C32 -177.0(4) . . . . ?
C29 C30 C31 N4 177.4(4) . . . . ?
N3 C30 C31 N4 1.3(7) . . . . ?
C28 C27 C32 C31 0.2(7) . . . . ?
C26 C27 C32 C31 -178.5(5) . . . . ?
C30 C31 C32 C27 0.3(7) . . . . ?
N4 C31 C32 C27 -178.1(4) . . . . ?
N4 C33 C34 C35 46.0(6) . . . . ?
C42 C33 C34 C35 -81.0(6) . . . . ?
N4 C33 C34 C39 -130.5(4) . . . . ?
C42 C33 C34 C39 102.5(5) . . . . ?
C39 C34 C35 N3 177.3(4) . . . . ?
C33 C34 C35 N3 0.9(7) . . . . ?
C39 C34 C35 C36 -0.2(7) . . . . ?
C33 C34 C35 C36 -176.5(4) . . . . ?
N3 C35 C36 C38 154.9(4) . . . . ?
C34 C35 C36 C38 -27.3(6) . . . . ?
C39 C37 C38 C40 70.1(6) . . . . ?
C39 C37 C38 C41 -170.4(4) . . . . ?
C39 C37 C38 C36 -50.5(6) . . . . ?
C35 C36 C38 C40 -70.9(5) . . . . ?
C35 C36 C38 C41 169.8(4) . . . . ?
C35 C36 C38 C37 50.3(5) . . . . ?
C35 C34 C39 O2 -176.8(4) . . . . ?
C33 C34 C39 O2 -0.2(7) . . . . ?
C35 C34 C39 C37 0.7(7) . . . . ?
C33 C34 C39 C37 177.3(4) . . . . ?
C38 C37 C39 O2 -155.8(4) . . . . ?
C38 C37 C39 C34 26.6(7) . . . . ?
N4 C33 C42 C43 -117.7(5) . . . . ?
C34 C33 C42 C43 8.5(7) . . . . ?
N4 C33 C42 C44 62.9(5) . . . . ?
C34 C33 C42 C44 -170.9(4) . . . . ?
C44 C42 C43 C46 -0.6(8) . . . . ?
C33 C42 C43 C46 -179.9(4) . . . . ?
C43 C42 C44 C45 17.5(7) . . . . ?
C33 C42 C44 C45 -163.1(4) . . . . ?
C42 C44 C45 C47 -47.8(7) . . . . ?
C42 C43 C46 C47 13.6(7) . . . . ?
C44 C45 C47 C48 -174.6(6) . . . . ?
C44 C45 C47 C46 60.7(6) . . . . ?
C43 C46 C47 C48 -168.8(5) . . . . ?
C43 C46 C47 C45 -42.7(6) . . . . ?
C45 C47 C48 C49 133.2(9) . . . . ?
C46 C47 C48 C49 -102.8(9) . . . . ?
C45 C47 C48 C50 -43.6(11) . . . . ?
C46 C47 C48 C50 80.4(9) . . . . ?
C6 C7 N1 C8 -55.4(6) . . . . ?
C3 C7 N1 C8 124.6(5) . . . . ?
C9 C8 N1 C7 83.3(5) . . . . ?
C17 C8 N1 C7 -46.1(5) . . . . ?
C9 C10 N2 C6 5.0(8) . . . . ?
C11 C10 N2 C6 -174.2(4) . . . . ?
C7 C6 N2 C10 19.2(8) . . . . ?
C5 C6 N2 C10 -165.7(4) . . . . ?
C34 C35 N3 C30 -4.5(8) . . . . ?
C36 C35 N3 C30 173.2(4) . . . . ?
C29 C30 N3 C35 163.3(4) . . . . ?
C31 C30 N3 C35 -20.6(7) . . . . ?
C32 C31 N4 C33 -122.8(5) . . . . ?
C30 C31 N4 C33 58.8(6) . . . . ?
C34 C33 N4 C31 -86.5(5) . . . . ?
C42 C33 N4 C31 43.1(5) . . . . ?
 
loop_
 _geom_hbond_atom_site_label_D 
 _geom_hbond_atom_site_label_H 
 _geom_hbond_atom_site_label_A 
 _geom_hbond_distance_DH 
 _geom_hbond_distance_HA 
 _geom_hbond_distance_DA 
 _geom_hbond_angle_DHA 
 _geom_hbond_site_symmetry_A 
 _geom_hbond_publ_flag
N2 H2N O1  0.877(14) 2.221(18) 3.087(5) 169(5) 4 yes
N3 H3N O2  0.884(14) 2.24(3) 3.058(5) 153(4) 4_645 yes
N1 H1N O2  0.883(14) 2.167(17) 3.040(5) 170(5) . yes
N4 H4N O1  0.877(14) 2.22(2) 3.042(5) 157(4) . yes
 
_refine_diff_density_max    0.913
_refine_diff_density_min   -0.424
_refine_diff_density_rms    0.100

_shelx_res_file
;

TITL FPD8_17_035 in I2
    FPD8_17_035.res
    created by SHELXL-2018/3 at 13:56:14 on 23-Oct-2018
CELL 0.71073  11.69250  14.23240  26.18439  90.0000  92.6637  90.0000
ZERR   4.00   0.00140   0.00160   0.00418   0.0000   0.0044   0.0000

LATT -2

SYMM -X, Y, -Z

SFAC C     H     N    O
UNIT 200 256 16 8

LIST 4 ! automatically inserted. Change 6 to 4 for CHECKCIF!!

L.S. 18

ACTA
BOND $H
CONF
WPDB

FMAP 2
PLAN -5

TEMP -123.150
SHEL 5.8 0.83
SIZE 0.23 0.21 0.10
REM Colourless Block

DFIX 0.88 0.01 N1 H1N
DFIX 0.88 0.01 N2 H2N
DFIX 0.88 0.01 N3 H3N
DFIX 0.88 0.01 N4 H4N

EQIV $1 -x+1/2, y+1/2, -z+1/2
EQIV $2 -x+3/2, y-1/2, -z+1/2

HTAB N2 O1_$1
HTAB N3 O2_$2
HTAB N1 O2
HTAB N4 O1
HTAB

WGHT    0.101600    6.198700
FVAR       0.08548   0.55388   0.96867
C1    1    0.632587    0.817160    0.457959    11.00000    0.04030    0.05662 =
         0.04704   -0.00075   -0.01924    0.00704
AFIX  33
H1A   2    0.618963    0.869737    0.481068    11.00000   -1.50000
H1B   2    0.625965    0.757771    0.476531    11.00000   -1.50000
H1C   2    0.709614    0.822465    0.445000    11.00000   -1.50000
AFIX   0
C2    1    0.545496    0.819471    0.413907    11.00000    0.02695    0.03769 =
         0.02444   -0.00136   -0.00442   -0.00537
C3    1    0.548374    0.751244    0.376208    11.00000    0.01879    0.03026 =
         0.02777    0.00458    0.00053    0.00363
AFIX  43
H3    2    0.607852    0.705754    0.378471    11.00000   -1.20000
AFIX   0
C4    1    0.456181    0.884690    0.410247    11.00000    0.02906    0.02814 =
         0.02686   -0.00249   -0.00194   -0.00132
AFIX  43
H4    2    0.452191    0.932918    0.435184    11.00000   -1.20000
AFIX   0
C5    1    0.373856    0.880000    0.370978    11.00000    0.02492    0.02250 =
         0.02406   -0.00023    0.00332   -0.00331
AFIX  43
H5    2    0.313693    0.924916    0.369448    11.00000   -1.20000
AFIX   0
C6    1    0.376948    0.810318    0.333192    11.00000    0.01827    0.02632 =
         0.01952    0.00143    0.00092   -0.00152
C7    1    0.467790    0.745995    0.334842    11.00000    0.02000    0.02488 =
         0.02375   -0.00262    0.00393   -0.00182
C8    1    0.377739    0.615900    0.287336    11.00000    0.02503    0.02127 =
         0.02436    0.00177    0.00191    0.00463
AFIX  13
H8    2    0.405955    0.559428    0.269003    11.00000   -1.20000
AFIX   0
C9    1    0.289873    0.661093    0.252076    11.00000    0.02003    0.02224 =
         0.02288    0.00118    0.00551    0.00049
C10   1    0.254212    0.752252    0.257028    11.00000    0.01995    0.02396 =
         0.01443    0.00045    0.00197   -0.00249
C11   1    0.165786    0.794555    0.219277    11.00000    0.02506    0.01955 =
         0.02778    0.00197   -0.00523    0.00379
AFIX  23
H11A  2    0.206150    0.828223    0.192357    11.00000   -1.20000
H11B  2    0.119820    0.841284    0.237401    11.00000   -1.20000
AFIX   0
C12   1    0.246553    0.604269    0.210039    11.00000    0.02104    0.02920 =
         0.02827   -0.00544    0.00192   -0.00015
C13   1    0.157355    0.645980    0.171889    11.00000    0.02819    0.02760 =
         0.03290   -0.00625   -0.00564    0.00431
AFIX  23
H13A  2    0.197280    0.672119    0.142543    11.00000   -1.20000
H13B  2    0.106645    0.594869    0.158751    11.00000   -1.20000
AFIX   0
C14   1    0.084663    0.721995    0.193819    11.00000    0.02253    0.02271 =
         0.02905   -0.00334   -0.00769    0.00125
C15   1    0.005516    0.681261    0.232457    11.00000    0.02162    0.03255 =
         0.04601   -0.00142    0.00030   -0.00297
AFIX  33
H15A  2   -0.041038    0.731656    0.246297    11.00000   -1.50000
H15B  2   -0.044704    0.634287    0.215697    11.00000   -1.50000
H15C  2    0.051180    0.651536    0.260328    11.00000   -1.50000
AFIX   0
C16   1    0.010771    0.770220    0.151380    11.00000    0.04372    0.03157 =
         0.03583    0.00350   -0.02077   -0.00653
AFIX  33
H16A  2   -0.035831    0.819373    0.166378    11.00000   -1.50000
H16B  2    0.060498    0.798373    0.126439    11.00000   -1.50000
H16C  2   -0.039461    0.723659    0.134269    11.00000   -1.50000
AFIX   0
C17   1    0.333651    0.580701    0.337278    11.00000    0.02502    0.01971 =
         0.02982   -0.00263    0.00424    0.00182
C18   1    0.230491    0.600302    0.354287    11.00000    0.03096    0.03244 =
         0.02609    0.00053   -0.00015   -0.00475
AFIX  43
H18   2    0.178763    0.634784    0.332414    11.00000   -1.20000
AFIX   0
C19   1    0.419413    0.522324    0.369320    11.00000    0.03488    0.03910 =
         0.04345    0.02112    0.00386    0.00366
AFIX  23
H19A  2    0.482528    0.563480    0.382312    11.00000   -1.20000
H19B  2    0.452627    0.473707    0.347388    11.00000   -1.20000
AFIX   0
C20   1    0.364652    0.474411    0.414725    11.00000    0.05338    0.04968 =
         0.04982    0.02626    0.00568    0.01323
AFIX  23
H20A  2    0.425195    0.449824    0.438820    11.00000   -1.20000
H20B  2    0.316742    0.420951    0.402398    11.00000   -1.20000
AFIX   0
C21   1    0.190922    0.571597    0.405481    11.00000    0.03465    0.04211 =
         0.03354   -0.00081    0.00810    0.00522
AFIX  23
H21A  2    0.139003    0.516909    0.401306    11.00000   -1.20000
H21B  2    0.147150    0.623825    0.420140    11.00000   -1.20000
AFIX   0
C22   1    0.290460    0.546037    0.442158    11.00000    0.04911    0.04296 =
         0.03232   -0.00104    0.00309   -0.00628
AFIX  13
H22   2    0.337622    0.604037    0.447836    11.00000   -1.20000
AFIX   0
C23   1    0.254652    0.513221    0.493659    11.00000    0.06672    0.07386 =
         0.03787    0.00682   -0.00263   -0.01840
C24   1    0.323455    0.531690    0.535364    11.00000    0.10397
AFIX  93
H24A  2    0.311847    0.499956    0.566619    11.00000   -1.20000
H24B  2    0.383419    0.576406    0.533420    11.00000   -1.20000
AFIX   0
C25   1    0.164110    0.445977    0.496229    11.00000    0.16462
AFIX 137
H25A  2    0.143562    0.438362    0.531853    11.00000   -1.50000
H25B  2    0.189535    0.385501    0.482914    11.00000   -1.50000
H25C  2    0.097226    0.468018    0.475679    11.00000   -1.50000
AFIX   0

MOLE 2
C26   1    0.366590    0.303183    0.041754    11.00000    0.04610    0.05136 =
         0.03547   -0.01189   -0.00704    0.00443
AFIX  33
H26A  2    0.381960    0.252112    0.017924    11.00000   -1.50000
H26B  2    0.290658    0.294419    0.055373    11.00000   -1.50000
H26C  2    0.369022    0.363486    0.023770    11.00000   -1.50000
AFIX   0
C27   1    0.456523    0.302460    0.085376    11.00000    0.02569    0.03483 =
         0.02835    0.00130   -0.00048    0.00132
C28   1    0.546446    0.238275    0.088159    11.00000    0.02737    0.03341 =
         0.02272   -0.00359    0.00283   -0.00516
AFIX  43
H28   2    0.551954    0.191765    0.062366    11.00000   -1.20000
AFIX   0
C29   1    0.627620    0.241670    0.128073    11.00000    0.01804    0.02220 =
         0.02657    0.00029    0.00289    0.00227
AFIX  43
H29   2    0.687970    0.196920    0.129492    11.00000   -1.20000
AFIX   0
C30   1    0.622918    0.309183    0.166231    11.00000    0.01719    0.01885 =
         0.02339    0.00071    0.00231   -0.00400
C31   1    0.532083    0.373698    0.164033    11.00000    0.01763    0.02393 =
         0.02469    0.00391    0.00301   -0.00015
C32   1    0.451400    0.368916    0.123675    11.00000    0.02224    0.03151 =
         0.03244    0.00060   -0.00061    0.00192
AFIX  43
H32   2    0.390280    0.412956    0.122274    11.00000   -1.20000
AFIX   0
C33   1    0.621580    0.504513    0.211106    11.00000    0.02003    0.01858 =
         0.03195   -0.00776    0.00143    0.00425
AFIX  13
H33   2    0.592926    0.561338    0.228981    11.00000   -1.20000
AFIX   0
C34   1    0.709991    0.459356    0.247377    11.00000    0.02055    0.02306 =
         0.02477   -0.00845   -0.00025    0.00251
C35   1    0.745048    0.367331    0.243490    11.00000    0.01641    0.02087 =
         0.03045   -0.00155    0.00400   -0.00046
C36   1    0.828596    0.323231    0.282111    11.00000    0.02893    0.02077 =
         0.02646   -0.00440   -0.00303   -0.00356
AFIX  23
H36A  2    0.874330    0.275390    0.264699    11.00000   -1.20000
H36B  2    0.785163    0.290699    0.308440    11.00000   -1.20000
AFIX   0
C37   1    0.836915    0.475593    0.328200    11.00000    0.03843    0.03386 =
         0.02520   -0.01230   -0.00479    0.00143
AFIX  23
H37A  2    0.794260    0.452371    0.357451    11.00000   -1.20000
H37B  2    0.888446    0.526390    0.341051    11.00000   -1.20000
AFIX   0
C38   1    0.910525    0.394776    0.308596    11.00000    0.02980    0.02246 =
         0.02872   -0.00050   -0.00391   -0.00150
C39   1    0.753012    0.516259    0.289244    11.00000    0.02160    0.02046 =
         0.03155   -0.00669    0.00626    0.00211
C40   1    0.997048    0.430951    0.270895    11.00000    0.02846    0.03137 =
         0.04902    0.00152    0.00011    0.00469
AFIX  33
H40A  2    0.956013    0.460888    0.241743    11.00000   -1.50000
H40B  2    1.048043    0.476870    0.288091    11.00000   -1.50000
H40C  2    1.042331    0.378192    0.258781    11.00000   -1.50000
AFIX   0
C41   1    0.977441    0.348398    0.353697    11.00000    0.04826    0.02433 =
         0.04776   -0.00810   -0.02106    0.00590
AFIX  33
H41A  2    0.923673    0.324761    0.378281    11.00000   -1.50000
H41B  2    1.022827    0.296075    0.341146    11.00000   -1.50000
H41C  2    1.028539    0.394752    0.370456    11.00000   -1.50000
AFIX   0
C42   1    0.664850    0.538517    0.160362    11.00000    0.03051    0.01720 =
         0.02890   -0.00027   -0.00677   -0.00157
C43   1    0.769126    0.520486    0.144527    11.00000    0.02615    0.02254 =
         0.03308   -0.00008   -0.00106    0.00572
AFIX  43
H43   2    0.819532    0.484177    0.166098    11.00000   -1.20000
AFIX   0
C44   1    0.580278    0.595982    0.128953    11.00000    0.03527    0.02908 =
         0.04485   -0.00072   -0.00678    0.01083
AFIX  23
H44A  2    0.576143    0.659747    0.143862    11.00000   -1.20000
H44B  2    0.503553    0.566959    0.130424    11.00000   -1.20000
AFIX   0
C45   1    0.611502    0.603991    0.073400    11.00000    0.04857    0.05097 =
         0.04533    0.01962   -0.00793    0.00152
AFIX  23
H45A  2    0.596440    0.543252    0.055928    11.00000   -1.20000
H45B  2    0.562697    0.652316    0.056089    11.00000   -1.20000
AFIX   0
C46   1    0.811780    0.554410    0.094304    11.00000    0.04379    0.03472 =
         0.03300    0.00343    0.00712   -0.00554
AFIX  23
H46A  2    0.816203    0.500321    0.070705    11.00000   -1.20000
H46B  2    0.890134    0.579806    0.100104    11.00000   -1.20000
AFIX   0
C47   1    0.735817    0.630079    0.069060    11.00000    0.05510    0.04356 =
         0.04756    0.01795   -0.00270    0.00394
AFIX  13
H47   2    0.749408    0.689654    0.088660    11.00000   -1.20000
AFIX   0
C48   1    0.768069    0.647742    0.015053    11.00000    0.06395    0.10310 =
         0.07734    0.05408   -0.00046   -0.02080
C49   1    0.831540    0.730075    0.011207    11.00000    0.18595
AFIX  93
H49A  2    0.853926    0.751139   -0.021276    11.00000   -1.20000
H49B  2    0.852435    0.765154    0.041067    11.00000   -1.20000
AFIX   0
C50   1    0.730598    0.587888   -0.026582    11.00000    0.10746
AFIX 137
H50A  2    0.760307    0.524256   -0.020590    11.00000   -1.50000
H50B  2    0.759178    0.612400   -0.058558    11.00000   -1.50000
H50C  2    0.646733    0.586157   -0.029014    11.00000   -1.50000
AFIX   0

N1    3    0.479191    0.678436    0.296898    11.00000    0.01960    0.02620 =
         0.02868   -0.00489    0.00301    0.00571
H1N   2    0.545875    0.649264    0.298522    11.00000   -1.20000
N2    3    0.290717    0.814534    0.293281    11.00000    0.01946    0.01896 =
         0.02560   -0.00118   -0.00167    0.00191
H2N   2    0.261863    0.871433    0.291867    11.00000   -1.20000
N3    3    0.707582    0.304667    0.206901    11.00000    0.02073    0.01810 =
         0.02352   -0.00298    0.00153    0.00228
H3N   2    0.751225    0.253959    0.206621    11.00000   -1.20000
N4    3    0.522001    0.440619    0.203142    11.00000    0.01509    0.02487 =
         0.03405   -0.00152   -0.00027    0.00439
H4N   2    0.460153    0.473613    0.195705    11.00000   -1.20000
O1    4    0.281747    0.522842    0.202450    11.00000    0.02533    0.02515 =
         0.04699   -0.01574   -0.00259    0.00591
O2    4    0.720050    0.598335    0.295519    11.00000    0.02965    0.02526 =
         0.04392   -0.01135   -0.00160    0.00351
HKLF 4


REM  FPD8_17_035 in I2
REM wR2 = 0.1772, GooF = S = 1.047, Restrained GooF = 1.047 for all data
REM R1 = 0.0650 for 6717 Fo > 4sig(Fo) and 0.0712 for all 7457 data
REM 501 parameters refined using 5 restraints

END

WGHT      0.1016      6.1828

REM Instructions for potential hydrogen bonds
HTAB C5 O1_$1
HTAB C29 O2_$2
HTAB N1 O2
HTAB N2 O1_$1
HTAB N3 O2_$2
HTAB N4 O1

REM Highest difference peak  0.913,  deepest hole -0.424,  1-sigma level  0.100
Q1    1   0.1433  0.5084  0.5070  11.00000  0.05    0.91
Q2    1   0.8563  0.6110 -0.0080  11.00000  0.05    0.79
Q3    1   0.2643  0.5538  0.5315  11.00000  0.05    0.51
Q4    1   0.4360  0.9763  0.4499  11.00000  0.05    0.49
Q5    1   0.5676  0.1446  0.0491  11.00000  0.05    0.42
;
_shelx_res_checksum    8693

_shelx_hkl_file
;
   2   0  -2  547.45   13.73
   2   0  -2  569.97   13.74
  -2   0   2  564.02   13.73
  -2   0   2  583.48   13.74
   3   0  -3    4.23    0.13
   3   0  -3    4.52    0.13
  -3   0   3    4.43    0.13
  -3   0   3    4.39    0.13
   4   0  -4   94.14    2.30
   4   0  -4   93.78    2.30
  -4   0   4   94.10    2.30
  -4   0   4   96.40    2.31
   5   0  -5    0.20    0.05
   5   0  -5    0.19    0.06
   6   0  -6   43.39    1.06
  -6   0   6   41.29    1.06
   7   0  -7    0.65    0.08
  -7   0   7    0.78    0.09
   8   0  -8    8.69    0.27
  -8   0   8    8.99    0.27
   9   0  -9   -0.02    0.06
  -9   0   9    0.08    0.07
  10   0 -10    0.09    0.07
  11   0 -11    0.24    0.09
  12   0 -12    0.04    0.08
 -12   0  12    0.07    0.08
 -13   0  13    0.09    0.09
 -13   1  12    0.52    0.10
 -12   1  11    0.36    0.08
  12  -1 -11    0.28    0.08
 -11   1  10    4.38    0.19
  11  -1 -10    4.51    0.20
  10  -1  -9    0.60    0.12
  -9   1   8    5.47    0.20
   9  -1  -8    5.54    0.20
  -8   1   7   16.44    0.44
   8  -1  -7   15.53    0.44
  -7   1   6    8.19    0.25
   7  -1  -6    8.04    0.25
  -6   1   5   37.62    0.94
   6  -1  -5   37.12    0.94
  -5   1   4   27.10    0.70
   5  -1  -4   28.21    0.70
  -4   1   3   13.81    0.36
  -4   1   3   14.32    0.36
   4  -1  -3   13.77    0.36
   4  -1  -3   13.22    0.36
  -3   1   2   22.13    0.56
  -3   1   2   22.74    0.56
   3  -1  -2   22.39    0.56
   3  -1  -2   22.27    0.56
  -2   1   1   38.96    0.93
  -2   1   1   38.52    0.93
   2  -1  -1   37.02    0.93
   2  -1  -1   38.17    0.93
  -1   1   0   25.30    0.59
  -1   1   0   23.06    0.59
   1   1  -2   16.84    0.41
   1   1  -2   16.98    0.42
   1   1  -2   17.02    0.42
  -1  -1   2   16.96    0.42
   2   1  -3    0.70    0.05
   2   1  -3    0.68    0.05
  -2  -1   3    0.69    0.05
  -2  -1   3    0.67    0.05
   3   1  -4  299.35    7.17
   3   1  -4  312.71    7.19
  -3  -1   4  305.84    7.18
  -3  -1   4  257.21    7.15
   4   1  -5    5.37    0.16
   4   1  -5    5.47    0.16
  -4  -1   5    5.18    0.16
  -4  -1   5    5.53    0.17
   5   1  -6    1.98    0.10
   5   1  -6    1.74    0.09
  -5  -1   6    1.78    0.13
   6   1  -7    5.99    0.19
  -6  -1   7    5.93    0.19
   7   1  -8    8.54    0.26
  -7  -1   8    9.03    0.26
   8   1  -9   10.05    0.30
  -8  -1   9   10.63    0.31
   9   1 -10    2.85    0.15
  -9  -1  10    2.54    0.15
  10   1 -11    0.25    0.08
  11   1 -12    0.31    0.08
 -11  -1  12    0.33    0.08
  12   1 -13    0.33    0.09
 -12  -1  13    0.54    0.13
 -13   2  11    3.74    0.19
  13  -2 -11    3.35    0.18
 -12   2  10    0.50    0.11
  12  -2 -10    0.34    0.09
 -11   2   9    0.00    0.07
  11  -2  -9    0.01    0.07
  10  -2  -8    4.35    0.19
  -9   2   7    3.17    0.15
   9  -2  -7    3.40    0.16
  -8   2   6    0.13    0.05
   8  -2  -6    0.27    0.06
  -7   2   5    0.68    0.09
   7  -2  -5    0.68    0.09
  -6   2   4    6.60    0.21
   6  -2  -4    6.69    0.21
  -5   2   3   71.73    1.70
   5  -2  -3   66.89    1.70
  -4   2   2   70.01    1.70
  -4   2   2   69.80    1.70
   4  -2  -2   68.45    1.70
   4  -2  -2   69.70    1.70
  -3   2   1    3.47    0.11
  -3   2   1    3.36    0.11
   3  -2  -1    3.20    0.11
   3  -2  -1    3.30    0.11
  -2   2   0  743.29   18.34
  -2   2   0  783.48   18.35
   2  -2   0  750.09   18.35
   2  -2   0  751.49   18.34
  -1   2  -1   38.99    0.96
  -1   2  -1   39.03    0.95
  -1   2  -1   39.55    0.95
   1  -2   1   38.92    0.96
   1  -2   1   39.26    0.95
   1  -2   1   39.67    0.96
   0   2  -2   29.16    0.71
   0  -2   2   29.67    0.71
   0  -2   2   28.76    0.72
   0  -2   2   29.95    0.71
  -1  -2   3  956.86   23.66
  -1  -2   3 1000.00   23.66
   2   2  -4  555.70   13.30
   2   2  -4  525.68   13.26
   2   2  -4  556.28   13.30
  -2  -2   4  562.24   13.30
  -2  -2   4  539.79   13.30
   3   2  -5   11.31    0.28
   3   2  -5   11.13    0.29
   3   2  -5   11.40    0.29
  -3  -2   5   11.37    0.29
  -3  -2   5   11.25    0.29
   4   2  -6   26.54    0.67
   4   2  -6   26.24    0.67
  -4  -2   6   27.19    0.67
   5   2  -7    3.57    0.13
   5   2  -7    3.16    0.12
  -5  -2   7    3.26    0.16
   6   2  -8    3.00    0.12
  -6  -2   8    3.29    0.13
   7   2  -9    0.47    0.08
  -7  -2   9    0.48    0.09
   8   2 -10   22.80    0.61
  -8  -2  10   23.87    0.62
   9   2 -11   -0.03    0.07
  -9  -2  11    0.02    0.07
  10   2 -12    3.84    0.17
  11   2 -13    0.94    0.11
 -11  -2  13    1.02    0.12
  12   2 -14    0.48    0.08
 -12  -2  14    0.58    0.13
 -13   3  10    1.13    0.14
  13  -3 -10    1.09    0.14
 -12   3   9    5.42    0.22
  12  -3  -9    5.32    0.22
 -11   3   8    0.25    0.07
  11  -3  -8    0.00    0.07
 -10   3   7    0.51    0.11
  10  -3  -7    0.63    0.12
  -9   3   6    7.07    0.24
   9  -3  -6    7.41    0.25
  -8   3   5    2.11    0.12
   8  -3  -5    2.18    0.13
  -7   3   4    0.29    0.06
   7  -3  -4    0.25    0.06
  -6   3   3    5.56    0.18
   6  -3  -3    5.43    0.18
  -5   3   2    0.68    0.09
   5  -3  -2    0.61    0.10
  -4   3   1   44.11    1.07
  -4   3   1   44.02    1.07
   4  -3  -1   40.44    1.06
   4  -3  -1   43.98    1.07
  -3   3   0   47.45    1.16
  -3   3   0   47.39    1.16
   3  -3   0   47.95    1.16
   3  -3   0   47.28    1.16
   3  -3   0   47.30    1.16
  -2   3  -1   20.78    0.52
  -2   3  -1   20.50    0.52
   2  -3   1   21.58    0.52
   2  -3   1   20.70    0.52
   2  -3   1   20.32    0.52
  -1   3  -2  203.99    4.65
  -1   3  -2  183.66    4.65
  -1   3  -2  189.89    4.64
   1  -3   2  192.85    4.65
   1  -3   2  182.47    4.64
   0   3  -3   47.23    1.16
   0   3  -3   47.98    1.16
   0  -3   3   49.43    1.16
   0  -3   3   48.55    1.16
   0  -3   3   46.25    1.17
   1   3  -4    7.34    0.19
   1   3  -4    7.17    0.19
   1   3  -4    7.23    0.19
  -1  -3   4    7.26    0.19
  -1  -3   4    7.09    0.19
  -1  -3   4    7.10    0.19
   2   3  -5  573.24   13.54
   2   3  -5  556.22   13.53
   2   3  -5  530.36   13.51
  -2  -3   5  557.36   13.51
  -2  -3   5  566.26   13.54
  -2  -3   5  562.32   13.55
   3   3  -6   49.04    1.16
   3   3  -6   46.53    1.15
   3   3  -6   47.25    1.16
  -3  -3   6   47.23    1.16
  -3  -3   6   46.99    1.16
   4   3  -7   73.07    1.82
   4   3  -7   75.62    1.83
  -4  -3   7   75.51    1.83
   5   3  -8    1.88    0.08
   5   3  -8    1.84    0.10
   5   3  -8    1.96    0.10
   6   3  -9   16.52    0.45
   6   3  -9   18.74    0.47
  -6  -3   9   18.29    0.48
   7   3 -10   10.56    0.30
  -7  -3  10   10.53    0.31
   8   3 -11   14.82    0.40
  -8  -3  11   14.20    0.41
   9   3 -12   15.72    0.44
  -9  -3  12   15.61    0.45
  10   3 -13    0.14    0.07
  11   3 -14   -0.04    0.07
  12   3 -15    0.02    0.08
 -12  -3  15    0.19    0.10
 -13   4   9    9.22    0.31
  13  -4  -9    9.25    0.33
 -12   4   8   13.86    0.42
  12  -4  -8   14.40    0.43
 -11   4   7    0.52    0.11
  11  -4  -7    0.43    0.09
 -10   4   6   -0.04    0.07
  10  -4  -6    0.01    0.08
  -9   4   5   -0.02    0.06
   9  -4  -5    0.05    0.07
  -8   4   4    1.58    0.11
   8  -4  -4    1.48    0.12
  -7   4   3    0.02    0.05
   7  -4  -3    0.01    0.05
  -6   4   2    3.38    0.13
   6  -4  -2    3.51    0.14
  -5   4   1   37.58    0.92
  -5   4   1   35.29    0.92
   5  -4  -1   37.11    0.92
  -4   4   0   11.79    0.31
  -4   4   0   10.85    0.36
   4  -4   0   11.92    0.31
  -3   4  -1    4.37    0.13
  -3   4  -1    4.31    0.13
   3  -4   1    4.33    0.14
   3  -4   1    4.16    0.13
   3  -4   1    4.21    0.13
  -2   4  -2   88.94    2.17
  -2   4  -2   88.81    2.17
  -2   4  -2   89.10    2.17
   2  -4   2   88.88    2.17
   2  -4   2   89.98    2.17
  -1   4  -3    6.09    0.16
  -1   4  -3    6.08    0.16
   1  -4   3    6.07    0.17
   1  -4   3    6.44    0.17
   0   4  -4   48.96    1.19
   0   4  -4   49.62    1.19
   0  -4   4   49.16    1.19
   0  -4   4   48.66    1.20
   0  -4   4   48.46    1.19
   1   4  -5   21.38    0.52
   1   4  -5   20.98    0.52
   1   4  -5   21.27    0.53
  -1  -4   5   21.27    0.53
  -1  -4   5   21.66    0.53
  -1  -4   5   21.10    0.53
   2   4  -6    1.72    0.07
   2   4  -6    1.70    0.07
   2   4  -6    1.72    0.07
  -2  -4   6    1.56    0.07
  -2  -4   6    1.70    0.08
  -2  -4   6    1.63    0.06
   3   4  -7  100.28    2.46
   3   4  -7  100.95    2.46
   3   4  -7  101.98    2.46
  -3  -4   7  102.78    2.47
  -3  -4   7  100.29    2.47
   4   4  -8    9.08    0.24
   4   4  -8    8.60    0.23
   4   4  -8    8.63    0.24
  -4  -4   8    8.64    0.25
   5   4  -9    1.61    0.09
   5   4  -9    1.49    0.08
   5   4  -9    1.43    0.07
  -5  -4   9    1.50    0.13
   6   4 -10    3.45    0.11
   6   4 -10    3.86    0.14
  -6  -4  10    3.83    0.14
   7   4 -11   10.46    0.30
  -7  -4  11   10.92    0.31
   8   4 -12    0.10    0.07
  -8  -4  12    0.10    0.07
  -9  -4  13   43.14    1.11
  10   4 -14    1.29    0.12
 -10  -4  14    1.12    0.13
  11   4 -15    6.02    0.22
 -11  -4  15    5.88    0.24
 -13   5   8    0.53    0.11
  13  -5  -8    0.43    0.09
 -12   5   7    6.60    0.24
  12  -5  -7    6.48    0.26
 -11   5   6    1.58    0.13
  11  -5  -6    1.61    0.15
 -10   5   5   11.47    0.35
  10  -5  -5   11.58    0.36
  -9   5   4    0.85    0.10
   9  -5  -4    0.99    0.12
  -8   5   3    0.10    0.06
   8  -5  -3    0.06    0.06
  -7   5   2    0.25    0.05
   7  -5  -2    0.22    0.06
  -6   5   1   17.98    0.47
   6  -5  -1   17.17    0.47
  -5   5   0    1.02    0.08
  -5   5   0    1.05    0.08
   5  -5   0    1.03    0.10
  -4   5  -1   10.78    0.28
  -4   5  -1    9.83    0.28
   4  -5   1   10.15    0.29
  -3   5  -2   11.30    0.30
  -3   5  -2   11.25    0.30
   3  -5   2   11.67    0.31
  -2   5  -3  373.43    9.14
  -2   5  -3  392.94    9.15
  -2   5  -3  352.03    9.17
   2  -5   3  384.16    9.16
  -1   5  -4    1.35    0.07
  -1   5  -4    1.35    0.06
   1  -5   4    1.43    0.07
   1  -5   4    1.28    0.07
   1  -5   4    1.35    0.08
   0   5  -5   60.24    1.45
   0   5  -5   59.86    1.45
   0  -5   5   59.40    1.46
   0  -5   5   59.01    1.45
   0  -5   5   59.50    1.45
   1   5  -6    0.16    0.03
   1   5  -6    0.23    0.05
   1   5  -6    0.11    0.04
  -1  -5   6    0.16    0.04
  -1  -5   6    0.16    0.04
   2   5  -7    3.45    0.11
   2   5  -7    3.53    0.11
   2   5  -7    3.41    0.11
  -2  -5   7    3.32    0.11
  -2  -5   7    3.49    0.11
  -2  -5   7    3.49    0.12
   3   5  -8   59.67    1.48
   3   5  -8   61.08    1.48
  -3  -5   8   61.93    1.49
  -3  -5   8   59.87    1.48
   4   5  -9    8.11    0.22
   4   5  -9    7.61    0.21
   4   5  -9    8.49    0.23
  -4  -5   9    8.03    0.23
   5   5 -10    1.38    0.08
   5   5 -10    1.45    0.08
   5   5 -10    1.36    0.06
  -5  -5  10    1.52    0.10
   6   5 -11    2.38    0.11
   6   5 -11    2.26    0.10
   6   5 -11    2.14    0.08
  -6  -5  11    2.46    0.11
   7   5 -12   36.73    0.91
  -7  -5  12   35.20    0.92
   8   5 -13    1.59    0.11
  -8  -5  13    1.51    0.13
   9   5 -14    4.00    0.17
  -9  -5  14    3.98    0.18
  10   5 -15    0.83    0.10
 -10  -5  15    0.60    0.10
  11   5 -16    0.41    0.08
 -11  -5  16    0.57    0.12
 -12   6   6    0.20    0.07
  12  -6  -6    0.28    0.09
 -11   6   5   12.45    0.38
  11  -6  -5   12.80    0.39
 -10   6   4    2.65    0.15
  10  -6  -4    2.62    0.16
  -9   6   3    0.06    0.06
   9  -6  -3    0.03    0.07
  -8   6   2    0.60    0.09
   8  -6  -2    0.57    0.11
  -7   6   1    0.98    0.10
   7  -6  -1    1.00    0.10
  -6   6   0    5.26    0.17
   6  -6   0    5.23    0.18
  -5   6  -1    5.37    0.17
  -5   6  -1    4.99    0.17
   5  -6   1    5.67    0.18
  -4   6  -2   34.85    0.83
  -4   6  -2   31.95    0.83
   4  -6   2   32.93    0.83
  -3   6  -3   28.28    0.71
  -3   6  -3   26.60    0.71
  -3   6  -3   28.20    0.70
   3  -6   3   28.60    0.70
  -2   6  -4   12.05    0.31
  -2   6  -4   11.82    0.33
  -2   6  -4   12.10    0.31
   2  -6   4   12.01    0.32
  -1   6  -5    2.51    0.09
  -1   6  -5    2.42    0.09
   1  -6   5    2.27    0.11
   1  -6   5    2.34    0.09
   1  -6   5    2.45    0.11
   0   6  -6    2.50    0.09
   0   6  -6    2.53    0.09
   0  -6   6    2.37    0.09
   0  -6   6    2.42    0.10
   0  -6   6    2.54    0.11
   1   6  -7   32.69    0.81
   1   6  -7   32.46    0.81
  -1  -6   7   33.13    0.81
  -1  -6   7   33.01    0.81
   2   6  -8    7.09    0.19
   2   6  -8    7.17    0.19
   2   6  -8    7.09    0.20
  -2  -6   8    7.06    0.21
  -2  -6   8    7.19    0.20
   3   6  -9   68.67    1.69
   3   6  -9   68.75    1.69
  -3  -6   9   68.53    1.69
  -3  -6   9   71.34    1.70
   4   6 -10   19.69    0.49
   4   6 -10   19.22    0.49
  -4  -6  10   19.44    0.51
   5   6 -11   15.64    0.41
   5   6 -11   15.19    0.40
   5   6 -11   16.55    0.42
  -5  -6  11   16.64    0.43
   6   6 -12    1.83    0.08
   6   6 -12    1.91    0.09
   6   6 -12    1.98    0.10
  -6  -6  12    2.06    0.12
   7   6 -13   11.57    0.32
  -7  -6  13   11.20    0.34
   8   6 -14    6.22    0.21
  -8  -6  14    6.26    0.23
   9   6 -15    1.00    0.10
  -9  -6  15    1.43    0.12
  10   6 -16    1.20    0.12
  11   6 -17    2.63    0.15
 -11  -6  17    2.57    0.16
 -12   7   5    0.09    0.07
  12  -7  -5   -0.02    0.08
 -11   7   4    1.15    0.12
  11  -7  -4    0.87    0.13
 -10   7   3   24.69    0.67
  10  -7  -3   25.56    0.68
   9  -7  -2    4.13    0.19
  -8   7   1   37.94    0.97
   8  -7  -1   37.75    0.97
  -7   7   0    5.00    0.17
   7  -7   0    5.00    0.19
  -6   7  -1   41.08    1.03
   6  -7   1   40.81    1.03
  -5   7  -2    0.86    0.07
  -5   7  -2    0.91    0.07
   5  -7   2    0.94    0.09
  -4   7  -3    0.65    0.07
  -4   7  -3    0.79    0.06
   4  -7   3    0.73    0.08
  -3   7  -4    3.70    0.12
  -3   7  -4    3.70    0.14
  -3   7  -4    3.84    0.13
   3  -7   4    3.77    0.14
  -2   7  -5    5.67    0.16
  -2   7  -5    5.71    0.18
  -2   7  -5    5.62    0.17
   2  -7   5    5.91    0.17
  -1   7  -6   10.01    0.26
  -1   7  -6   10.11    0.26
   1  -7   6   10.34    0.27
   0   7  -7   16.45    0.42
   0   7  -7   17.24    0.42
   0  -7   7   16.76    0.43
   0  -7   7   16.34    0.43
   1   7  -8    3.40    0.11
   1   7  -8    3.39    0.10
  -1  -7   8    3.49    0.12
  -1  -7   8    3.58    0.12
   2   7  -9    3.94    0.12
   2   7  -9    3.73    0.11
  -2  -7   9    3.80    0.12
  -2  -7   9    3.66    0.13
   3   7 -10   14.90    0.38
   3   7 -10   15.40    0.38
   3   7 -10   14.36    0.38
  -3  -7  10   15.23    0.39
  -3  -7  10   14.60    0.38
   4   7 -11    2.75    0.09
   4   7 -11    2.59    0.09
   4   7 -11    2.36    0.09
   5   7 -12    4.11    0.13
   5   7 -12    4.14    0.12
   5   7 -12    3.77    0.13
  -5  -7  12    3.91    0.15
  -6  -7  13   58.53    1.46
   7   7 -14    0.27    0.05
  -7  -7  14    0.38    0.07
   8   7 -15   10.82    0.31
  -8  -7  15   11.01    0.33
   9   7 -16    2.96    0.13
  -9  -7  16    3.15    0.18
  10   7 -17    0.06    0.06
 -10  -7  17   -0.11    0.09
 -12   8   4    1.76    0.13
  12  -8  -4    1.58    0.16
 -11   8   3    0.10    0.06
  11  -8  -3    0.04    0.08
 -10   8   2    8.23    0.26
  10  -8  -2    7.81    0.28
  -9   8   1    0.20    0.07
   9  -8  -1    0.19    0.08
  -8   8   0    7.46    0.24
   8  -8   0    7.61    0.26
  -7   8  -1   11.11    0.32
   7  -8   1   11.09    0.33
  -6   8  -2   25.94    0.67
   6  -8   2   26.00    0.68
  -5   8  -3    1.63    0.08
  -5   8  -3    1.36    0.08
   5  -8   3    1.60    0.10
  -4   8  -4    2.40    0.09
  -4   8  -4    2.37    0.10
   4  -8   4    2.50    0.14
  -3   8  -5   15.87    0.42
  -3   8  -5   16.19    0.43
  -3   8  -5   16.57    0.42
   3  -8   5   16.29    0.43
  -2   8  -6    8.50    0.23
  -2   8  -6    8.66    0.25
   2  -8   6    8.54    0.24
   2  -8   6    8.53    0.25
  -1   8  -7   22.73    0.57
  -1   8  -7   23.26    0.57
   1  -8   7   23.02    0.59
   1  -8   7   23.14    0.59
   0   8  -8   18.16    0.45
   0   8  -8   17.34    0.45
   0  -8   8   17.94    0.46
   0  -8   8   18.34    0.47
   1   8  -9    2.17    0.08
   1   8  -9    2.25    0.08
  -1  -8   9    2.20    0.10
  -1  -8   9    2.08    0.10
   2   8 -10    1.22    0.05
  -2  -8  10    1.04    0.08
  -2  -8  10    1.09    0.08
   3   8 -11    1.19    0.06
   3   8 -11    1.29    0.06
  -3  -8  11    1.22    0.07
  -3  -8  11    1.18    0.09
   4   8 -12    9.35    0.25
  -4  -8  12    9.80    0.28
  -4  -8  12    9.11    0.25
   5   8 -13    6.07    0.18
  -5  -8  13    6.25    0.20
   6   8 -14   22.77    0.58
  -6  -8  14   22.88    0.61
   7   8 -15    9.30    0.26
  -7  -8  15    9.33    0.29
  -8  -8  16    0.10    0.07
  -9  -8  17    0.14    0.10
 -11   9   2    0.28    0.08
  11  -9  -2    0.33    0.09
 -10   9   1    0.85    0.10
  10  -9  -1    0.70    0.13
  -9   9   0    0.07    0.06
   9  -9   0    0.05    0.08
  -8   9  -1    2.03    0.11
   8  -9   1    2.22    0.14
  -7   9  -2    0.35    0.08
   7  -9   2    0.25    0.07
  -6   9  -3    5.72    0.19
   6  -9   3    6.01    0.21
  -5   9  -4    7.81    0.22
  -5   9  -4    7.37    0.22
   5  -9   4    7.63    0.24
  -4   9  -5    9.16    0.25
  -4   9  -5    8.60    0.25
   4  -9   5    9.27    0.27
  -3   9  -6    0.15    0.03
  -3   9  -6    0.14    0.06
  -3   9  -6    0.19    0.03
   3  -9   6    0.22    0.07
   3  -9   6    0.12    0.05
  -2   9  -7   24.11    0.62
  -2   9  -7   23.09    0.59
  -2   9  -7   24.76    0.59
   2  -9   7   23.39    0.61
   2  -9   7   23.17    0.61
  -1   9  -8    0.85    0.09
  -1   9  -8    0.87    0.05
   1  -9   8    0.74    0.08
   1  -9   8    0.99    0.08
   0   9  -9   27.59    0.68
   0  -9   9   28.06    0.70
   0  -9   9   27.38    0.70
   1   9 -10    2.54    0.09
  -1  -9  10    2.58    0.12
  -1  -9  10    2.50    0.11
  -2  -9  11    6.49    0.20
  -2  -9  11    6.45    0.19
   3   9 -12    4.44    0.13
   4   9 -13   12.53    0.32
  -4  -9  13   12.53    0.35
   5   9 -14    0.20    0.03
  -5  -9  14    0.26    0.06
   6   9 -15    3.39    0.11
  -6  -9  15    3.23    0.15
   7   9 -16    1.05    0.07
  -7  -9  16    1.09    0.12
 -11  10   1    0.28    0.07
  11 -10  -1    0.00    0.09
 -10  10   0    0.31    0.07
  10 -10   0    0.23    0.09
  -9  10  -1    4.08    0.16
   9 -10   1    3.48    0.21
   8 -10   2    3.54    0.18
  -7  10  -3    2.52    0.11
   7 -10   3    2.09    0.15
  -6  10  -4    0.55    0.07
   6 -10   4    0.72    0.11
  -5  10  -5    7.83    0.23
   5 -10   5    8.17    0.25
  -4  10  -6    2.83    0.10
   4 -10   6    2.57    0.15
   4 -10   6    2.72    0.13
  -3  10  -7    0.37    0.07
  -3  10  -7    0.43    0.05
   3 -10   7    0.45    0.09
   3 -10   7    0.32    0.07
  -2  10  -8   17.34    0.48
  -2  10  -8   18.23    0.46
  -2  10  -8   18.22    0.45
   2 -10   8   17.15    0.49
   2 -10   8   17.67    0.48
  -1  10  -9    0.64    0.10
   1 -10   9    0.66    0.10
   1 -10   9    0.77    0.10
   0  10 -10   27.56    0.69
   0 -10  10   28.44    0.71
   0 -10  10   27.66    0.71
  -1 -10  11    3.13    0.14
  -1 -10  11    3.16    0.13
  -2 -10  12   33.91    0.85
   3  10 -13    1.14    0.05
  -3 -10  13    1.38    0.10
  -3 -10  13    1.13    0.08
   4  10 -14    1.43    0.06
  -4 -10  14    1.24    0.08
  -4 -10  14    1.32    0.09
  -5 -10  15    5.38    0.21
 -10  11  -1    2.73    0.14
  10 -11   1    2.74    0.17
  -9  11  -2    0.74    0.09
   9 -11   2    0.58    0.10
  -8  11  -3    3.22    0.13
   8 -11   3    3.22    0.16
  -7  11  -4    1.21    0.09
   7 -11   4    1.30    0.12
  -6  11  -5    0.23    0.05
   6 -11   5    0.26    0.07
  -5  11  -6    8.15    0.23
   5 -11   6    8.24    0.26
   5 -11   6    8.17    0.27
  -4  11  -7    2.32    0.09
   4 -11   7    2.36    0.12
   4 -11   7    2.28    0.14
  -3  11  -8   18.70    0.52
  -3  11  -8   19.14    0.48
   3 -11   8   19.04    0.50
   3 -11   8   18.32    0.51
  -2  11  -9    2.06    0.13
  -2  11  -9    2.00    0.07
   2 -11   9    2.02    0.13
   2 -11   9    2.17    0.12
  -1  11 -10   10.74    0.32
   1 -11  10   10.60    0.33
   1 -11  10   10.98    0.31
   0 -11  11    4.42    0.16
  -1 -11  12    2.40    0.11
  -1 -11  12    2.34    0.12
  -2 -11  13    5.45    0.19
  -2 -11  13    5.12    0.17
  -3 -11  14    2.48    0.11
  -9  12  -3    4.19    0.16
   9 -12   3    3.90    0.19
  -8  12  -4   14.08    0.39
  -7  12  -5    2.45    0.10
   7 -12   5    2.36    0.14
  -6  12  -6    3.42    0.12
   6 -12   6    3.29    0.18
   6 -12   6    3.41    0.15
  -5  12  -7    0.15    0.03
   5 -12   7    0.15    0.06
   5 -12   7    0.21    0.08
  -4  12  -8    0.15    0.08
  -4  12  -8    0.25    0.03
   4 -12   8    0.11    0.07
  -3  12  -9   12.46    0.37
  -3  12  -9   12.60    0.33
   3 -12   9   12.06    0.36
   3 -12   9   12.68    0.36
  -2  12 -10    6.26    0.23
   2 -12  10    5.94    0.21
   2 -12  10    6.19    0.21
  -1  12 -11   20.70    0.56
   1 -12  11   19.96    0.54
   0 -12  12   13.45    0.37
  -1 -12  13   15.35    0.42
  -2 -12  14    0.32    0.06
  -8  13  -5    4.40    0.18
   8 -13   5    4.12    0.22
   7 -13   6    1.52    0.15
   6 -13   7    1.31    0.14
   5 -13   8    7.78    0.27
   4 -13   9    3.93    0.18
  -3  13 -10    0.35    0.08
  -2  13 -11    3.49    0.17
   2 -13  11    3.63    0.16
  -1  13 -12    0.67    0.11
   1 -13  12    0.64    0.10
   0  13 -13    5.30    0.21
   0 -13  13    5.34    0.19
  -1 -13  14    1.93    0.11
   7 -14   7    2.96    0.19
   6 -14   8    0.33    0.09
   5 -14   9    0.32    0.08
   4 -14  10    7.56    0.27
  -3  14 -11    0.40    0.09
   3 -14  11    0.09    0.08
  -2  14 -12    3.19    0.17
   2 -14  12    3.26    0.15
  -1  14 -13    2.18    0.15
   1 -14  13    2.31    0.12
   0  14 -14    0.65    0.12
   1  14 -15    0.10    0.08
   5 -15  10    0.96    0.14
   4 -15  11    0.35    0.09
  -3  15 -12    1.12    0.14
   3 -15  12    1.27    0.12
  -2  15 -13    0.11    0.09
   2 -15  13    0.22    0.07
  -1  15 -14    0.37    0.10
   0  15 -15    0.65    0.10
   1  15 -14   -0.08    0.08
   0  15 -13    0.16    0.09
   1 -15  12    1.29    0.11
  -1  15 -12    1.04    0.13
   2 -15  11    0.88    0.11
  -2  15 -11    0.70    0.13
   3 -15  10    1.97    0.14
   4 -15   9    0.53    0.09
   5 -15   8    0.23    0.09
  -1 -14  13    0.98    0.10
   1  14 -13    0.89    0.12
   0 -14  12    2.00    0.12
   0  14 -12    2.11    0.14
   1 -14  11    2.14    0.14
  -1  14 -11    1.89    0.14
   2 -14  10    0.87    0.12
  -2  14 -10    0.95    0.13
   3 -14   9    0.21    0.07
  -3  14  -9    0.19    0.08
   4 -14   8    1.92    0.14
   5 -14   7    4.33    0.20
   6 -14   6    4.14    0.20
   7 -14   5    2.08    0.17
  -2 -13  13    9.57    0.28
  -1 -13  12    6.19    0.21
   1  13 -12    6.66    0.24
   0 -13  11    0.23    0.07
   0  13 -11    0.27    0.08
   1 -13  10    1.35    0.12
  -1  13 -10    1.42    0.13
   2 -13   9    7.52    0.25
  -2  13  -9    7.67    0.26
  -3  13  -8    3.03    0.16
   4 -13   7    4.95    0.21
   5 -13   6    1.12    0.12
   6 -13   5    2.39    0.16
   7 -13   4    5.27    0.23
   8 -13   3    2.05    0.17
   9 -13   2    0.29    0.10
  -3 -12  13    0.31    0.05
  -2 -12  12    1.36    0.09
  -1 -12  11    8.30    0.25
   0 -12  10    1.27    0.11
   1 -12   9   15.38    0.43
   2 -12   8    1.12    0.11
   2 -12   8    0.88    0.09
  -2  12  -8    0.89    0.14
   3 -12   7   15.06    0.43
   3 -12   7   15.08    0.41
  -3  12  -7   15.06    0.43
   4 -12   6    1.10    0.12
   4 -12   6    1.06    0.10
  -4  12  -6    1.03    0.05
   5 -12   5    0.53    0.09
   5 -12   5    0.51    0.09
  -5  12  -5    0.42    0.05
   6 -12   4    0.77    0.13
   6 -12   4    0.66    0.10
  -6  12  -4    0.81    0.06
   7 -12   3    1.43    0.14
   7 -12   3    1.06    0.11
  -7  12  -3    1.17    0.08
   8 -12   2   13.26    0.39
  -8  12  -2   13.49    0.37
   9 -12   1    0.41    0.08
  -9  12  -1    0.61    0.09
  10 -12   0    0.02    0.08
 -10  12   0    0.19    0.07
  -4 -11  13    4.87    0.16
  -3 -11  12    1.52    0.09
  -2 -11  11    1.23    0.09
  -2 -11  11    1.22    0.09
  -1 -11  10    1.94    0.10
  -1 -11  10    2.15    0.11
   0 -11   9    1.10    0.10
   0 -11   9    0.97    0.08
   0  11  -9    1.07    0.11
   1 -11   8   20.76    0.55
   1 -11   8   21.33    0.56
  -1  11  -8   21.21    0.56
   2 -11   7    5.13    0.18
   2 -11   7    4.92    0.19
  -2  11  -7    4.87    0.19
   3 -11   6   16.39    0.45
   3 -11   6   15.95    0.44
  -3  11  -6   16.36    0.45
  -3  11  -6   16.47    0.41
   4 -11   5   -0.02    0.05
   4 -11   5    0.06    0.07
  -4  11  -5    0.03    0.03
   5 -11   4    7.62    0.24
   5 -11   4    7.96    0.27
  -5  11  -4    7.50    0.22
   6 -11   3    0.69    0.10
  -6  11  -3    0.76    0.07
   7 -11   2    0.18    0.06
  -7  11  -2    0.26    0.05
   8 -11   1    7.16    0.24
  -8  11  -1    6.61    0.22
   9 -11   0    0.26    0.08
  -9  11   0    0.37    0.08
  10 -11  -1    3.48    0.18
 -10  11   1    3.88    0.16
  -5 -10  13    0.40    0.09
  -4 -10  12    5.50    0.18
  -4 -10  12    5.32    0.17
  -3 -10  11    0.76    0.09
  -3 -10  11    0.59    0.07
  -2 -10  10    2.95    0.12
  -2 -10  10    2.71    0.11
  -1 -10   9   14.89    0.40
  -1 -10   9   15.09    0.40
   0 -10   8   28.22    0.72
   0 -10   8   28.12    0.71
   0  10  -8   28.12    0.73
   1 -10   7    0.23    0.05
   1 -10   7    0.30    0.06
  -1  10  -7    0.22    0.07
   2 -10   6   30.10    0.74
   2 -10   6   29.16    0.75
  -2  10  -6   29.24    0.76
  -2  10  -6   29.00    0.72
  -2  10  -6   29.37    0.72
   3 -10   5    0.17    0.07
   3 -10   5    0.19    0.06
  -3  10  -5    0.14    0.07
  -3  10  -5    0.10    0.03
  -3  10  -5    0.10    0.03
   4 -10   4    0.20    0.06
   4 -10   4    0.19    0.07
  -4  10  -4    0.15    0.03
   5 -10   3   10.44    0.31
  -5  10  -3   10.89    0.29
   6 -10   2    5.79    0.21
  -6  10  -2    5.78    0.18
   7 -10   1    0.72    0.11
  -7  10  -1    0.75    0.08
   8 -10   0    4.17    0.18
  -8  10   0    3.87    0.17
  -9  10   1    6.66    0.22
  10 -10  -2    5.83    0.24
 -10  10   2    6.08    0.21
  11 -10  -3    0.05    0.09
 -11  10   3    0.05    0.07
  -7  -9  14    2.37    0.13
   7   9 -14    2.49    0.09
  -6  -9  13   23.32    0.61
   6   9 -13   22.99    0.58
  -5  -9  12    1.89    0.11
   5   9 -12    1.95    0.07
  -4  -9  11    1.08    0.08
  -4  -9  11    0.94    0.10
  -3  -9  10   16.33    0.43
  -3  -9  10   16.31    0.43
  -2  -9   9    0.49    0.07
  -2  -9   9    0.44    0.08
  -1  -9   8    8.13    0.23
  -1  -9   8    8.47    0.24
   0  -9   7    2.84    0.11
   0  -9   7    2.80    0.12
   1  -9   6    0.26    0.06
   1  -9   6    0.14    0.04
  -1   9  -6    0.20    0.03
  -1   9  -6    0.17    0.06
  -1   9  -6    0.20    0.03
   2  -9   5    6.44    0.21
   2  -9   5    6.69    0.20
  -2   9  -5    6.57    0.18
  -2   9  -5    6.51    0.21
   3  -9   4    2.01    0.10
   3  -9   4    1.90    0.12
  -3   9  -4    1.82    0.11
  -3   9  -4    1.91    0.08
  -3   9  -4    1.93    0.08
   4  -9   3    1.93    0.17
  -4   9  -3    2.15    0.08
  -4   9  -3    1.99    0.08
   5  -9   2    0.13    0.05
  -5   9  -2    0.02    0.04
  -5   9  -2    0.00    0.04
   6  -9   1   12.77    0.36
  -6   9  -1   12.34    0.34
   7  -9   0    3.03    0.15
  -7   9   0    2.98    0.13
   8  -9  -1   10.73    0.33
  -8   9   1   10.48    0.31
   9  -9  -2    0.06    0.07
  -9   9   2    0.20    0.06
  10  -9  -3    2.69    0.16
 -10   9   3    2.50    0.13
  11  -9  -4    2.83    0.17
 -11   9   4    2.82    0.16
  10   8 -16    0.98    0.12
  -9  -8  15    1.28    0.12
  -8  -8  14   15.44    0.44
  -7  -8  13    4.49    0.17
  -6  -8  12    6.03    0.21
   6   8 -12    6.47    0.18
  -5  -8  11    4.10    0.16
   5   8 -11    3.96    0.12
  -4  -8  10   27.91    0.75
  -4  -8  10   30.41    0.75
   4   8 -10   29.82    0.73
  -3  -8   9    4.54    0.15
  -3  -8   9    4.75    0.15
   3   8  -9    4.48    0.12
   3   8  -9    4.58    0.12
  -2  -8   8    2.48    0.10
  -2  -8   8    2.27    0.12
   2   8  -8    2.51    0.07
   2   8  -8    2.55    0.07
  -1  -8   7    0.00    0.04
  -1  -8   7   -0.02    0.06
   0  -8   6    5.72    0.17
   0  -8   6    5.50    0.18
   1  -8   5   20.80    0.52
   1  -8   5   20.88    0.54
  -1   8  -5   20.47    0.54
  -1   8  -5   20.68    0.51
  -1   8  -5   20.49    0.51
   2  -8   4   87.25    2.12
   2  -8   4   87.08    2.13
  -2   8  -4   87.65    2.11
  -2   8  -4   86.54    2.11
  -2   8  -4   85.83    2.13
   3  -8   3   53.77    1.33
   3  -8   3   54.83    1.32
  -3   8  -3   53.47    1.32
  -3   8  -3   52.50    1.31
   4  -8   2    3.83    0.15
  -4   8  -2    4.16    0.13
  -4   8  -2    3.78    0.13
   5  -8   1    0.37    0.08
  -5   8  -1    0.26    0.04
  -5   8  -1    0.20    0.05
   6  -8   0   40.16    1.03
  -6   8   0   41.33    1.02
   7  -8  -1    2.87    0.15
  -7   8   1    2.84    0.13
   8  -8  -2    0.60    0.12
  -8   8   2    0.60    0.09
   9  -8  -3    1.79    0.14
  -9   8   3    1.68    0.12
  10  -8  -4    0.24    0.09
 -10   8   4    0.17    0.07
  11  -8  -5    0.29    0.09
 -11   8   5    0.30    0.07
  12  -8  -6    1.90    0.17
 -12   8   6    1.82    0.15
 -10  -7  15    2.10    0.13
  10   7 -15    1.96    0.11
  -9  -7  14    3.49    0.17
  -8  -7  13    0.85    0.10
   8   7 -13    0.90    0.08
  -7  -7  12    1.64    0.11
   7   7 -12    1.69    0.09
  -6  -7  11   29.11    0.75
   6   7 -11   29.18    0.73
   5   7 -10    7.82    0.22
   5   7 -10    8.12    0.22
  -4  -7   9   46.53    1.13
  -4  -7   9   46.26    1.12
   4   7  -9   44.27    1.13
   4   7  -9   45.74    1.12
  -3  -7   8   17.34    0.44
  -3  -7   8   17.31    0.44
   3   7  -8   17.02    0.43
  -2  -7   7    0.27    0.04
  -2  -7   7    0.37    0.06
   2   7  -7    0.40    0.03
   2   7  -7    0.37    0.03
  -1  -7   6    5.02    0.16
  -1  -7   6    4.90    0.14
  -1  -7   6    5.16    0.15
   0  -7   5   10.64    0.29
   0  -7   5   10.50    0.28
   0  -7   5   11.09    0.29
   0   7  -5   10.93    0.27
   0   7  -5   10.97    0.27
   1  -7   4    1.67    0.08
   1  -7   4    1.56    0.07
  -1   7  -4    1.63    0.06
  -1   7  -4    1.56    0.10
  -1   7  -4    1.55    0.06
   2  -7   3    2.47    0.10
   2  -7   3    2.38    0.11
  -2   7  -3    2.39    0.08
  -2   7  -3    2.44    0.09
  -2   7  -3    2.37    0.11
   3  -7   2    7.05    0.20
  -3   7  -2    6.71    0.19
   4  -7   1    3.25    0.13
  -4   7  -1    3.20    0.12
  -4   7  -1    3.48    0.12
   5  -7   0    8.93    0.26
  -5   7   0    9.01    0.25
  -5   7   0    8.03    0.24
   6  -7  -1   10.08    0.30
  -6   7   1   10.18    0.29
   7  -7  -2    6.46    0.23
  -7   7   2    6.69    0.21
   8  -7  -3    1.64    0.13
  -8   7   3    1.39    0.11
   9  -7  -4   14.06    0.40
  -9   7   4   13.21    0.42
  10  -7  -5    0.20    0.09
 -10   7   5    0.26    0.07
  11  -7  -6    0.18    0.08
 -11   7   6    0.05    0.07
  12  -7  -7    0.61    0.14
 -12   7   7    0.82    0.12
 -11  -6  15    0.17    0.08
  11   6 -15    0.14    0.07
  10   6 -14    0.46    0.10
  -9  -6  13    1.34    0.13
   9   6 -13    1.70    0.10
  -8  -6  12    2.84    0.14
   8   6 -12    2.68    0.12
  -7  -6  11    7.29    0.24
   7   6 -11    7.26    0.22
  -6  -6  10   32.45    0.80
   6   6 -10   32.10    0.79
   6   6 -10   30.09    0.79
  -5  -6   9    4.33    0.15
   5   6  -9    4.08    0.13
   5   6  -9    4.40    0.14
  -4  -6   8   58.41    1.42
   4   6  -8   58.23    1.41
   4   6  -8   55.74    1.41
  -3  -6   7  130.40    3.18
  -3  -6   7  130.85    3.18
   3   6  -7  130.35    3.17
   3   6  -7  130.11    3.17
   3   6  -7  133.08    3.18
  -2  -6   6    0.78    0.07
  -2  -6   6    0.64    0.07
  -2  -6   6    0.72    0.06
   2   6  -6    0.74    0.04
   2   6  -6    0.72    0.04
   2   6  -6    0.70    0.07
  -1  -6   5    1.43    0.08
  -1  -6   5    1.44    0.07
  -1  -6   5    1.36    0.07
   1   6  -5    1.44    0.05
   1   6  -5    1.39    0.09
   1   6  -5    1.47    0.05
   0  -6   4   69.84    1.67
   0  -6   4   66.88    1.68
   0  -6   4   69.41    1.67
   0   6  -4   68.21    1.66
   0   6  -4   68.84    1.66
   1  -6   3    4.50    0.15
   1  -6   3    4.56    0.13
   1  -6   3    4.68    0.14
  -1   6  -3    4.60    0.13
   2  -6   2   11.28    0.30
   2  -6   2   11.71    0.30
  -2   6  -2   11.61    0.32
  -2   6  -2   11.75    0.30
  -2   6  -2   11.53    0.30
   3  -6   1   21.44    0.54
  -3   6  -1   21.37    0.53
  -3   6  -1   20.42    0.53
   4  -6   0    5.80    0.18
  -4   6   0    5.56    0.17
  -4   6   0    6.03    0.18
   5  -6  -1    2.90    0.13
  -5   6   1    2.67    0.11
  -5   6   1    2.56    0.11
   6  -6  -2   17.35    0.47
  -6   6   2   17.93    0.47
   7  -6  -3   11.28    0.33
  -7   6   3   11.21    0.32
   8  -6  -4    5.41    0.20
  -8   6   4    5.23    0.19
   9  -6  -5    1.29    0.13
  10  -6  -6    0.56    0.09
 -10   6   6    0.62    0.11
  11  -6  -7    3.15    0.18
 -11   6   7    3.49    0.16
  12  -6  -8    0.07    0.08
 -12   6   8    0.25    0.08
 -11  -5  14    1.13    0.15
  11   5 -14    1.25    0.12
 -10  -5  13    0.25    0.09
  10   5 -13    0.19    0.07
  -9  -5  12    0.80    0.11
   9   5 -12    0.93    0.11
  -8  -5  11   11.30    0.33
   8   5 -11   11.18    0.32
  -7  -5  10   17.91    0.48
   7   5 -10   18.12    0.47
  -6  -5   9   24.64    0.63
   6   5  -9   24.89    0.61
   6   5  -9   22.51    0.61
  -5  -5   8    4.29    0.15
   5   5  -8    4.52    0.14
   5   5  -8    4.04    0.13
   5   5  -8    4.15    0.13
  -4  -5   7   11.77    0.32
   4   5  -7   11.90    0.31
   4   5  -7   11.79    0.31
   4   5  -7   12.04    0.31
  -3  -5   6   10.46    0.27
  -3  -5   6    9.83    0.27
  -3  -5   6   10.45    0.28
   3   5  -6   10.44    0.27
   3   5  -6   10.57    0.27
   3   5  -6   10.57    0.27
  -2  -5   5    8.71    0.23
  -2  -5   5    8.32    0.23
  -2  -5   5    8.52    0.23
   2   5  -5    8.75    0.22
   2   5  -5    8.48    0.23
  -1  -5   4    1.96    0.08
  -1  -5   4    2.09    0.07
  -1  -5   4    2.04    0.07
   1   5  -4    2.13    0.09
   1   5  -4    2.11    0.06
   1   5  -4    2.11    0.06
   0  -5   3   21.22    0.54
   0  -5   3   21.81    0.55
   0  -5   3   22.09    0.54
   0   5  -3   22.28    0.53
   0   5  -3   21.90    0.53
   1  -5   2    2.33    0.08
   1  -5   2    2.25    0.08
   1  -5   2    2.24    0.09
  -1   5  -2    2.26    0.09
  -1   5  -2    2.35    0.07
   2  -5   1    3.22    0.11
   2  -5   1    3.10    0.10
   2  -5   1    3.00    0.11
  -2   5  -1    3.22    0.10
  -2   5  -1    3.23    0.10
   3  -5   0    0.20    0.04
   3  -5   0    0.18    0.05
  -3   5   0    0.18    0.04
  -3   5   0    0.17    0.04
   4  -5  -1    6.52    0.20
  -4   5   1    6.53    0.19
  -4   5   1    6.55    0.20
   5  -5  -2    8.76    0.25
  -5   5   2    7.82    0.24
  -5   5   2    8.42    0.24
   6  -5  -3    9.92    0.28
  -6   5   3    9.60    0.28
   7  -5  -4    1.60    0.11
  -7   5   4    1.71    0.10
   8  -5  -5    1.20    0.11
  -8   5   5    1.26    0.10
   9  -5  -6    1.40    0.13
  -9   5   6    1.31    0.11
  10  -5  -7   13.19    0.40
 -10   5   7   13.05    0.39
  11  -5  -8    0.19    0.08
 -11   5   8    0.20    0.07
  12  -5  -9    1.55    0.17
 -12   5   9    1.43    0.13
 -12  -4  14    0.11    0.09
  12   4 -14    0.05    0.07
 -11  -4  13    0.60    0.12
  11   4 -13    0.55    0.10
 -10  -4  12    0.01    0.06
  10   4 -12   -0.02    0.06
  -9  -4  11    3.74    0.17
   9   4 -11    3.78    0.16
  -8  -4  10    7.89    0.25
   8   4 -10    7.66    0.24
  -7  -4   9    0.60    0.08
   7   4  -9    0.58    0.07
  -6  -4   8    0.72    0.08
   6   4  -8    0.59    0.07
   6   4  -8    0.56    0.07
  -5  -4   7   68.13    1.59
   5   4  -7   62.31    1.58
   5   4  -7   65.47    1.59
   5   4  -7   62.92    1.59
  -4  -4   6   21.80    0.55
   4   4  -6   21.71    0.54
   4   4  -6   21.01    0.54
   4   4  -6   21.60    0.54
  -3  -4   5    4.31    0.13
  -3  -4   5    4.42    0.14
  -3  -4   5    4.55    0.13
   3   4  -5    4.58    0.13
   3   4  -5    4.28    0.13
   3   4  -5    4.51    0.13
  -2  -4   4  382.27    9.15
  -2  -4   4  355.20    9.15
  -2  -4   4  388.45    9.15
   2   4  -4  345.91    9.14
   2   4  -4  377.76    9.16
   2   4  -4  408.95    9.14
  -1  -4   3   25.62    0.63
  -1  -4   3   25.44    0.63
  -1  -4   3   26.01    0.63
   1   4  -3   25.25    0.62
   1   4  -3   25.59    0.63
   1   4  -3   25.65    0.62
   0  -4   2    5.42    0.14
   0  -4   2    5.15    0.15
   0  -4   2    5.38    0.14
   0   4  -2    5.29    0.15
   1  -4   1   59.19    1.46
   1  -4   1   59.87    1.47
   1  -4   1   60.76    1.46
  -1   4  -1   61.00    1.46
  -1   4  -1   59.32    1.46
   2  -4   0  242.18    6.21
  -2   4   0  267.82    6.22
   3  -4  -1    9.19    0.24
   3  -4  -1    8.74    0.24
  -3   4   1    9.27    0.24
  -3   4   1    9.12    0.24
   4  -4  -2    5.63    0.17
  -4   4   2    5.35    0.17
  -4   4   2    5.10    0.24
   5  -4  -3    8.33    0.25
  -5   4   3    8.54    0.24
  -5   4   3    8.04    0.25
   6  -4  -4    0.18    0.06
  -6   4   4    0.15    0.05
   7  -4  -5    3.06    0.14
  -7   4   5    3.06    0.13
   8  -4  -6    2.85    0.14
  -8   4   6    2.59    0.14
   9  -4  -7    0.51    0.12
  -9   4   7    0.43    0.10
  10  -4  -8    0.32    0.09
 -10   4   8    0.20    0.07
  11  -4  -9    0.21    0.08
 -11   4   9    0.21    0.07
  12  -4 -10    2.62    0.17
 -12   4  10    2.34    0.15
 -12  -3  13    1.21    0.15
  12   3 -13    0.89    0.12
 -11  -3  12    0.89    0.14
  11   3 -12    0.58    0.10
 -10  -3  11    7.56    0.26
  10   3 -11    7.34    0.25
  -9  -3  10    4.33    0.18
   9   3 -10    4.30    0.17
  -8  -3   9    3.16    0.14
   8   3  -9    3.23    0.14
  -7  -3   8    5.46    0.18
   7   3  -8    5.11    0.17
  -6  -3   7   21.08    0.53
   6   3  -7   19.30    0.52
   6   3  -7   20.30    0.52
  -5  -3   6   15.41    0.42
   5   3  -6   15.28    0.40
   5   3  -6   16.58    0.41
   5   3  -6   15.90    0.41
  -4  -3   5   17.74    0.46
  -4  -3   5   18.94    0.47
   4   3  -5   17.78    0.46
   4   3  -5   18.08    0.46
   4   3  -5   18.30    0.46
  -3  -3   4   25.51    0.65
  -3  -3   4   26.26    0.65
   3   3  -4   26.35    0.64
   3   3  -4   27.00    0.64
   3   3  -4   25.17    0.64
  -2  -3   3    6.44    0.17
  -2  -3   3    6.58    0.17
  -2  -3   3    6.43    0.17
   2   3  -3    6.57    0.17
   2   3  -3    6.53    0.17
   2   3  -3    6.50    0.17
  -1  -3   2  174.80    4.43
   1   3  -2  189.03    4.39
   1   3  -2  173.18    4.43
   1   3  -2  189.06    4.39
   0  -3   1  540.93   12.29
   0  -3   1  528.19   12.34
   0   3  -1  471.87   12.32
   0   3  -1  492.56   12.33
   1  -3   0  281.83    6.67
   1  -3   0  274.63    6.66
   1  -3   0  262.50    6.68
  -1   3   0  292.44    6.67
  -1   3   0  260.36    6.65
   2  -3  -1    4.67    0.13
   2  -3  -1    4.53    0.13
  -2   3   1    4.69    0.13
  -2   3   1    4.62    0.13
   3  -3  -2   82.42    2.03
   3  -3  -2   82.89    2.03
  -3   3   2   82.22    2.03
  -3   3   2   85.53    2.03
   4  -3  -3    2.86    0.12
   4  -3  -3    2.79    0.12
  -4   3   3    2.65    0.11
  -4   3   3    2.86    0.12
   5  -3  -4   82.42    2.01
  -5   3   4   81.43    2.01
   6  -3  -5    0.34    0.06
  -6   3   5    0.33    0.06
   7  -3  -6    2.81    0.13
  -7   3   6    3.10    0.13
   8  -3  -7    1.25    0.12
  -8   3   7    1.22    0.11
   9  -3  -8    1.14    0.12
  -9   3   8    1.22    0.12
  10  -3  -9    0.24    0.08
 -10   3   9    0.18    0.07
  11  -3 -10    0.98    0.13
 -11   3  10    0.80    0.11
  12  -3 -11    2.82    0.18
 -12   3  11    2.64    0.16
 -13   3  12    0.35    0.08
 -12  -2  12    0.08    0.09
  12   2 -12   -0.07    0.07
 -11  -2  11    0.23    0.08
  11   2 -11    0.16    0.08
 -10  -2  10    0.06    0.07
  10   2 -10    0.03    0.07
  -9  -2   9    5.89    0.21
   9   2  -9    5.60    0.20
  -8  -2   8    4.81    0.18
   8   2  -8    4.91    0.18
  -7  -2   7    3.75    0.14
   7   2  -7    3.66    0.14
  -6  -2   6   64.49    1.58
   6   2  -6   63.72    1.58
  -5  -2   5    5.62    0.19
   5   2  -5    5.76    0.18
   5   2  -5    5.34    0.17
  -4  -2   4    9.99    0.27
  -4  -2   4    9.85    0.27
   4   2  -4   10.08    0.27
   4   2  -4   10.21    0.27
  -3  -2   3  102.87    2.53
  -3  -2   3  102.34    2.53
   3   2  -3  107.42    2.53
  -2  -2   2   26.21    0.64
  -2  -2   2   26.72    0.64
   2   2  -2   25.70    0.64
   2   2  -2   26.05    0.64
   2   2  -2   25.59    0.64
  -1  -2   1  192.99    4.76
  -1  -2   1  194.18    4.74
   1   2  -1  200.82    4.73
   1   2  -1  192.07    4.73
   1   2  -1  197.35    4.76
   0  -2   0    6.66    0.17
   0  -2   0    6.81    0.17
   0   2   0    6.87    0.17
   0   2   0    6.96    0.17
   1  -2  -1  166.62    4.22
   1  -2  -1  169.35    4.22
  -1   2   1  190.23    4.23
  -1   2   1  167.54    4.21
   2  -2  -2   26.53    0.65
   2  -2  -2   25.67    0.65
  -2   2   2   25.72    0.65
  -2   2   2   26.85    0.65
   3  -2  -3  104.10    2.52
   3  -2  -3  104.04    2.52
  -3   2   3  101.66    2.52
  -3   2   3  104.35    2.52
   4  -2  -4    9.25    0.27
   4  -2  -4   10.39    0.27
  -4   2   4    9.65    0.27
  -4   2   4   10.21    0.27
   5  -2  -5    5.71    0.19
  -5   2   5    5.80    0.19
   6  -2  -6   63.80    1.57
  -6   2   6   63.40    1.57
   7  -2  -7    3.66    0.15
  -7   2   7    3.87    0.15
   8  -2  -8    4.64    0.18
  -8   2   8    4.87    0.18
   9  -2  -9    5.58    0.21
  -9   2   9    5.46    0.21
  10  -2 -10   -0.03    0.07
 -10   2  10    0.04    0.07
  11  -2 -11    0.11    0.08
 -11   2  11    0.28    0.07
  12  -2 -12   -0.05    0.08
 -12   2  12   -0.03    0.07
 -13  -1  12    0.60    0.14
  13   1 -12    0.59    0.13
  12   1 -11    0.36    0.09
 -11  -1  10    4.76    0.20
  11   1 -10    4.36    0.19
 -10  -1   9    0.60    0.11
  10   1  -9    0.70    0.12
  -9  -1   8    5.34    0.20
   9   1  -8    5.46    0.20
  -8  -1   7   16.08    0.44
   8   1  -7   15.59    0.43
  -7  -1   6    8.09    0.24
   7   1  -6    8.15    0.24
  -6  -1   5   40.54    1.00
   6   1  -5   38.97    0.99
  -5  -1   4   27.47    0.69
   5   1  -4   27.91    0.69
   5   1  -4   26.74    0.69
  -4  -1   3   14.42    0.37
  -4  -1   3   13.56    0.36
   4   1  -3   13.93    0.36
   4   1  -3   14.49    0.37
  -3  -1   2   22.76    0.56
  -3  -1   2   22.61    0.56
   3   1  -2   22.35    0.56
   3   1  -2   22.03    0.56
  -2  -1   1   38.26    0.93
  -2  -1   1   37.23    0.93
   2   1  -1   39.18    0.93
   2   1  -1   37.29    0.93
   1   1   0   24.83    0.60
   1   1   0   24.59    0.60
   1   1   0   24.53    0.60
   1  -1  -2   16.12    0.43
   1  -1  -2   17.82    0.43
  -1   1   2   17.64    0.43
  -1   1   2   17.70    0.43
   2  -1  -3    0.69    0.06
   2  -1  -3    0.64    0.05
  -2   1   3    0.72    0.06
  -2   1   3    0.67    0.06
   3  -1  -4  287.75    7.36
   3  -1  -4  302.56    7.37
  -3   1   4  314.18    7.38
   4  -1  -5    5.53    0.17
   4  -1  -5    5.27    0.16
  -4   1   5    5.23    0.17
  -4   1   5    5.67    0.17
   5  -1  -6    2.17    0.12
  -5   1   6    2.03    0.11
   6  -1  -7    5.81    0.19
  -6   1   7    6.06    0.19
   7  -1  -8    8.65    0.26
  -7   1   8    8.39    0.25
   8  -1  -9   10.08    0.31
  -8   1   9   10.57    0.31
   9  -1 -10    2.64    0.15
  -9   1  10    2.61    0.15
  10  -1 -11    0.20    0.08
 -10   1  11    0.28    0.08
  11  -1 -12    0.37    0.08
 -11   1  12    0.27    0.07
  12  -1 -13    0.31    0.09
 -12   1  13    0.33    0.09
 -13   0  11   -0.03    0.08
  13   0 -11    0.17    0.08
 -12   0  10   -0.15    0.07
  12   0 -10    0.00    0.07
 -11   0   9    0.19    0.07
  11   0  -9    0.12    0.07
 -10   0   8    5.32    0.21
  -9   0   7    0.21    0.07
   9   0  -7    0.34    0.07
  -8   0   6    6.02    0.20
   8   0  -6    5.78    0.20
  -7   0   5   -0.01    0.05
   7   0  -5   -0.01    0.05
  -6   0   4    0.12    0.06
   6   0  -4    0.09    0.05
  -5   0   3    0.02    0.06
   5   0  -3   -0.03    0.05
   5   0  -3    0.01    0.07
  -4   0   2   37.18    0.93
  -4   0   2   38.16    0.93
   4   0  -2   38.71    0.93
   4   0  -2   37.09    0.93
  -3   0   1    4.11    0.13
  -3   0   1    4.18    0.13
   3   0  -1    4.12    0.12
   3   0  -1    4.25    0.12
  -2   0   0  209.10    5.42
  -2   0   0  231.06    5.44
   2   0   0  221.74    5.43
   2   0   0  229.65    5.44
   1   0  -3    0.08    0.02
   1   0  -3    0.07    0.02
  -1   0   3    0.07    0.02
  -1   0   3    0.08    0.02
   3   0  -5    0.28    0.06
   3   0  -5    0.25    0.06
  -3   0   5    0.30    0.05
  -3   0   5    0.22    0.04
   4   0  -6   23.80    0.59
   4   0  -6   23.03    0.59
  -4   0   6   23.08    0.59
  -4   0   6   24.06    0.60
   5   0  -7    0.49    0.09
  -5   0   7    0.52    0.10
   6   0  -8    0.82    0.09
  -6   0   8    0.59    0.09
   7   0  -9    1.85    0.11
  -7   0   9    1.78    0.11
   8   0 -10   14.29    0.41
  -8   0  10   15.15    0.42
   9   0 -11    0.05    0.07
  -9   0  11    0.02    0.07
  10   0 -12    5.49    0.22
 -10   0  12    5.90    0.22
  11   0 -13   -0.05    0.07
 -11   0  13    0.04    0.07
  12   0 -14    1.24    0.14
 -12   0  14    1.28    0.14
 -13   1  10    0.20    0.08
  13  -1 -10    0.02    0.08
 -12   1   9    2.93    0.16
  12  -1  -9    2.64    0.16
 -11   1   8    0.64    0.12
  11  -1  -8    0.54    0.12
 -10   1   7    0.10    0.07
  -9   1   6    0.30    0.07
   9  -1  -6    0.37    0.07
  -8   1   5    0.15    0.06
   8  -1  -5    0.20    0.06
  -7   1   4   29.06    0.74
   7  -1  -4   28.84    0.74
  -6   1   3   12.04    0.33
   6  -1  -3   11.45    0.33
  -5   1   2    9.52    0.28
   5  -1  -2    9.78    0.27
  -4   1   1   14.83    0.38
  -4   1   1   14.69    0.38
   4  -1  -1   15.31    0.38
   4  -1  -1   14.34    0.38
  -3   1   0    5.92    0.17
  -3   1   0    6.01    0.17
   3  -1   0    5.83    0.17
   3  -1   0    5.98    0.17
  -2   1  -1   66.07    1.60
  -2   1  -1   65.71    1.60
   2  -1   1   65.13    1.60
   2  -1   1   67.70    1.60
   2  -1   1   65.09    1.60
  -1   1  -2  149.71    3.70
  -1   1  -2  157.91    3.70
   1  -1   2  144.69    3.70
   1  -1   2  154.47    3.71
   0   1  -3  147.43    3.53
   0   1  -3  140.34    3.53
   0  -1   3  148.84    3.53
   0  -1   3  141.89    3.53
   1   1  -4   53.04    1.30
   1   1  -4   52.89    1.30
  -1  -1   4   53.74    1.30
  -1  -1   4   54.31    1.30
   2   1  -5   90.99    2.22
   2   1  -5   91.36    2.22
  -2  -1   5   88.62    2.22
  -2  -1   5   93.99    2.22
   3   1  -6  299.44    7.31
  -3  -1   6  300.81    7.31
  -3  -1   6  297.01    7.31
   4   1  -7   15.69    0.41
  -4  -1   7   15.50    0.41
   5   1  -8    5.36    0.17
  -5  -1   8    5.20    0.17
   6   1  -9   16.36    0.43
  -6  -1   9   16.10    0.44
   7   1 -10    1.87    0.11
  -7  -1  10    1.73    0.11
   8   1 -11    3.52    0.16
  -8  -1  11    3.74    0.16
   9   1 -12    0.10    0.08
  -9  -1  12    0.00    0.07
  10   1 -13    1.02    0.13
 -10  -1  13    1.10    0.13
  11   1 -14    0.11    0.07
 -11  -1  14    0.12    0.07
  12   1 -15    0.10    0.08
 -12  -1  15   -0.04    0.08
 -13   2   9    0.55    0.13
  13  -2  -9    0.73    0.13
 -12   2   8    0.30    0.08
  12  -2  -8    0.45    0.09
 -11   2   7    1.14    0.12
  11  -2  -7    1.17    0.13
 -10   2   6    2.04    0.15
  -9   2   5    1.86    0.12
   9  -2  -5    1.88    0.13
  -8   2   4    1.11    0.10
   8  -2  -4    1.10    0.09
  -7   2   3    0.55    0.07
   7  -2  -3    0.46    0.09
  -6   2   2    7.69    0.23
   6  -2  -2    7.81    0.23
  -5   2   1   18.70    0.47
   5  -2  -1   17.74    0.49
  -4   2   0    8.05    0.22
  -4   2   0    7.90    0.22
   4  -2   0    8.06    0.22
   4  -2   0    7.83    0.22
  -3   2  -1   21.14    0.52
  -3   2  -1   21.62    0.53
   3  -2   1   20.53    0.53
   3  -2   1   20.76    0.52
   3  -2   1   20.78    0.53
  -2   2  -2   20.20    0.50
  -2   2  -2   20.34    0.51
  -2   2  -2   20.16    0.51
   2  -2   2   20.44    0.51
   2  -2   2   20.12    0.50
   2  -2   2   20.60    0.51
  -1   2  -3    0.49    0.05
  -1   2  -3    0.47    0.05
   1  -2   3    0.58    0.05
   1  -2   3    0.49    0.05
   0   2  -4    5.70    0.15
   0   2  -4    5.55    0.15
   0  -2   4    5.58    0.15
   0  -2   4    5.81    0.16
   1   2  -5  535.57   13.66
   1   2  -5  561.98   13.62
   1   2  -5  586.09   13.68
  -1  -2   5  579.69   13.68
  -1  -2   5  546.27   13.62
  -1  -2   5  570.80   13.67
   2   2  -6   25.90    0.61
   2   2  -6   23.49    0.60
   2   2  -6   24.68    0.61
  -2  -2   6   24.88    0.61
  -2  -2   6   24.12    0.61
   3   2  -7   83.82    2.02
   3   2  -7   83.90    2.02
   3   2  -7   81.82    2.00
  -3  -2   7   81.00    2.02
  -3  -2   7   82.88    2.02
   4   2  -8   97.13    2.32
   4   2  -8   91.61    2.32
  -4  -2   8   97.05    2.33
   5   2  -9   15.97    0.42
  -5  -2   9   15.49    0.42
   6   2 -10    4.46    0.16
  -6  -2  10    4.93    0.17
   7   2 -11    4.13    0.16
  -7  -2  11    4.43    0.17
   8   2 -12    0.50    0.10
  -8  -2  12    0.52    0.11
  -9  -2  13    0.95    0.12
  10   2 -14    4.60    0.19
 -10  -2  14    4.55    0.20
  11   2 -15    0.05    0.08
 -11  -2  15    0.14    0.08
  12   2 -16   -0.17    0.08
 -12  -2  16   -0.10    0.08
 -13   3   8    0.14    0.08
  13  -3  -8    0.22    0.09
 -12   3   7    0.99    0.12
  12  -3  -7    1.12    0.13
 -11   3   6    3.59    0.17
  11  -3  -6    3.42    0.18
  -9   3   4    3.98    0.16
   9  -3  -4    4.28    0.18
  -8   3   3    0.65    0.09
   8  -3  -3    0.57    0.10
  -7   3   2    0.11    0.05
   7  -3  -2    0.18    0.06
  -6   3   1    6.32    0.20
   6  -3  -1    6.13    0.20
  -5   3   0    6.67    0.20
   5  -3   0    6.41    0.21
  -4   3  -1    1.89    0.10
  -4   3  -1    1.71    0.09
   4  -3   1    1.86    0.10
   4  -3   1    1.88    0.09
   4  -3   1    1.69    0.08
  -3   3  -2   43.57    1.06
  -3   3  -2   42.10    1.06
   3  -3   2   42.49    1.06
   3  -3   2   42.96    1.06
   3  -3   2   43.67    1.06
  -2   3  -3   41.40    1.03
  -2   3  -3   41.62    1.03
  -2   3  -3   41.93    1.03
   2  -3   3   43.20    1.03
   2  -3   3   42.74    1.03
  -1   3  -4    1.72    0.07
  -1   3  -4    1.72    0.07
   1  -3   4    1.59    0.07
   1  -3   4    1.71    0.07
   0   3  -5   13.61    0.34
   0   3  -5   13.98    0.34
   0  -3   5   13.30    0.34
   0  -3   5   13.58    0.34
   1   3  -6  222.55    5.46
   1   3  -6  230.73    5.46
  -1  -3   6  238.77    5.44
  -1  -3   6  210.31    5.46
  -1  -3   6  215.81    5.49
   2   3  -7   16.54    0.43
   2   3  -7   17.25    0.43
   2   3  -7   17.34    0.42
  -2  -3   7   17.18    0.43
  -2  -3   7   16.28    0.43
  -2  -3   7   16.69    0.41
   3   3  -8    5.94    0.18
   3   3  -8    5.89    0.15
   3   3  -8    5.57    0.18
  -3  -3   8    5.89    0.18
   4   3  -9  187.33    4.57
   4   3  -9  188.36    4.57
  -4  -3   9  189.31    4.57
   5   3 -10    3.58    0.11
   5   3 -10    3.69    0.13
  -5  -3  10    3.79    0.14
   6   3 -11   26.48    0.67
   6   3 -11   24.87    0.65
  -6  -3  11   27.27    0.68
   7   3 -12    2.20    0.12
  -7  -3  12    2.15    0.13
   8   3 -13   52.17    1.33
  -8  -3  13   54.08    1.34
   9   3 -14   -0.03    0.07
  -9  -3  14    0.04    0.07
  10   3 -15    2.63    0.15
 -10  -3  15    2.44    0.16
  11   3 -16    0.99    0.12
 -11  -3  16    0.97    0.14
 -13   4   7    5.32    0.22
  13  -4  -7    5.22    0.23
 -12   4   6    1.34    0.12
  12  -4  -6    1.12    0.14
 -11   4   5    1.25    0.12
  11  -4  -5    0.94    0.13
 -10   4   4    1.20    0.12
  -9   4   3    0.56    0.10
   9  -4  -3    0.86    0.12
  -8   4   2    0.39    0.06
   8  -4  -2    0.36    0.07
  -7   4   1    7.51    0.23
   7  -4  -1    7.59    0.24
  -6   4   0    5.40    0.18
   6  -4   0    5.76    0.19
  -5   4  -1   15.33    0.40
   5  -4   1   15.13    0.41
  -4   4  -2   11.57    0.31
  -4   4  -2   11.35    0.33
   4  -4   2   11.91    0.32
  -3   4  -3  124.12    2.97
  -3   4  -3  119.10    2.97
  -3   4  -3  121.80    2.97
   3  -4   3  118.74    2.97
   3  -4   3  128.23    2.98
  -2   4  -4    0.68    0.06
  -2   4  -4    0.65    0.07
  -2   4  -4    0.60    0.05
   2  -4   4    0.58    0.06
   2  -4   4    0.61    0.06
  -1   4  -5   66.98    1.62
  -1   4  -5   65.27    1.61
   1  -4   5   66.60    1.62
   1  -4   5   66.37    1.62
   0   4  -6   12.06    0.30
   0   4  -6   11.86    0.30
   0  -4   6   11.73    0.31
   0  -4   6   11.70    0.30
   0  -4   6   11.62    0.30
   1   4  -7   31.90    0.78
   1   4  -7   32.49    0.78
  -1  -4   7   32.13    0.78
  -1  -4   7   31.32    0.79
  -1  -4   7   31.04    0.79
   2   4  -8   83.77    1.95
   2   4  -8   81.38    1.96
   2   4  -8   79.05    1.96
  -2  -4   8   79.00    1.95
  -2  -4   8   77.39    1.96
  -2  -4   8   81.54    1.96
   3   4  -9    4.16    0.14
   3   4  -9    4.14    0.12
   3   4  -9    3.92    0.14
  -3  -4   9    4.15    0.14
   4   4 -10   23.41    0.56
   4   4 -10   22.94    0.57
   4   4 -10   21.91    0.57
  -4  -4  10   21.54    0.59
   5   4 -11   28.77    0.75
   5   4 -11   30.64    0.74
   5   4 -11   27.54    0.72
  -5  -4  11   29.70    0.74
   6   4 -12    0.49    0.04
   6   4 -12    0.67    0.08
  -6  -4  12    0.59    0.09
   7   4 -13    8.69    0.27
  -7  -4  13    8.68    0.27
   8   4 -14    0.28    0.07
  -8  -4  14    0.27    0.07
   9   4 -15    5.65    0.21
  -9  -4  15    5.70    0.22
  10   4 -16    2.12    0.14
 -10  -4  16    2.29    0.15
  11   4 -17   11.75    0.36
 -11  -4  17   11.51    0.37
 -13   5   6    6.42    0.24
  13  -5  -6    6.34    0.27
 -12   5   5    6.74    0.25
  12  -5  -5    6.70    0.26
 -11   5   4    4.19    0.19
  11  -5  -4    4.25    0.20
 -10   5   3   12.31    0.36
  10  -5  -3   11.40    0.40
  -9   5   2    0.49    0.10
   9  -5  -2    0.63    0.11
  -8   5   1    3.14    0.14
   8  -5  -1    3.09    0.15
  -7   5   0    0.38    0.08
   7  -5   0    0.23    0.06
  -6   5  -1   48.49    1.20
   6  -5   1   47.61    1.20
  -5   5  -2   15.56    0.41
   5  -5   2   15.20    0.41
  -4   5  -3   11.59    0.32
  -4   5  -3   11.93    0.32
   4  -5   3   12.07    0.33
  -3   5  -4    1.15    0.09
  -3   5  -4    1.09    0.10
  -3   5  -4    1.07    0.10
   3  -5   4    1.09    0.09
  -2   5  -5   10.73    0.28
  -2   5  -5   10.83    0.28
   2  -5   5   10.73    0.29
   2  -5   5   10.08    0.28
  -1   5  -6   47.49    1.15
  -1   5  -6   47.39    1.15
   1  -5   6   46.81    1.15
   1  -5   6   45.51    1.15
   0   5  -7   24.46    0.60
   0   5  -7   23.48    0.60
   0  -5   7   23.57    0.60
   0  -5   7   24.23    0.60
   0  -5   7   24.80    0.61
   1   5  -8   37.87    0.92
   1   5  -8   37.47    0.92
  -1  -5   8   36.87    0.93
  -1  -5   8   37.53    0.92
   2   5  -9    2.98    0.13
   2   5  -9    3.02    0.11
  -2  -5   9    3.03    0.12
  -2  -5   9    3.02    0.10
   3   5 -10    1.06    0.07
   3   5 -10    1.09    0.06
  -3  -5  10    1.01    0.05
  -3  -5  10    1.13    0.09
   4   5 -11    0.90    0.07
   4   5 -11    0.89    0.05
   4   5 -11    0.97    0.07
  -4  -5  11    0.95    0.10
   5   5 -12   12.33    0.35
   5   5 -12   13.83    0.35
   5   5 -12   12.55    0.33
  -5  -5  12   13.43    0.36
   6   5 -13    2.45    0.09
   6   5 -13    2.75    0.12
  -6  -5  13    2.76    0.14
   7   5 -14    0.25    0.06
  -7  -5  14    0.17    0.07
   8   5 -15   11.79    0.34
  -8  -5  15   11.79    0.36
   9   5 -16   14.15    0.40
  10   5 -17    3.32    0.16
 -10  -5  17    3.37    0.18
  11   5 -18    0.63    0.12
 -11  -5  18    0.47    0.10
 -12   6   4    0.97    0.12
  12  -6  -4    0.91    0.14
 -11   6   3   12.51    0.38
  11  -6  -3   13.33    0.40
 -10   6   2    3.23    0.16
  10  -6  -2    3.39    0.18
  -9   6   1    2.37    0.13
   9  -6  -1    2.34    0.15
  -8   6   0    3.12    0.14
   8  -6   0    3.02    0.16
  -7   6  -1    7.88    0.24
   7  -6   1    7.97    0.25
  -6   6  -2    8.30    0.24
   6  -6   2    8.21    0.25
  -5   6  -3    7.00    0.21
   5  -6   3    6.97    0.22
  -4   6  -4    7.03    0.21
  -4   6  -4    7.02    0.21
  -4   6  -4    7.40    0.21
   4  -6   4    6.70    0.23
  -3   6  -5   62.91    1.51
  -3   6  -5   59.57    1.51
  -3   6  -5   60.52    1.51
   3  -6   5   62.92    1.51
  -2   6  -6    9.96    0.29
  -2   6  -6   10.55    0.29
  -2   6  -6   10.22    0.28
   2  -6   6   10.56    0.28
  -1   6  -7   12.59    0.33
  -1   6  -7   12.94    0.33
   1  -6   7   12.58    0.34
   1  -6   7   12.48    0.33
   0   6  -8   35.63    0.89
   0   6  -8   36.05    0.89
   0  -6   8   35.88    0.89
   0  -6   8   36.34    0.90
   1   6  -9    0.09    0.04
   1   6  -9    0.08    0.04
  -1  -6   9    0.05    0.04
  -1  -6   9    0.13    0.05
   2   6 -10    0.92    0.06
   2   6 -10    1.02    0.07
  -2  -6  10    0.85    0.08
  -2  -6  10    0.90    0.05
   3   6 -11    3.36    0.11
   3   6 -11    3.57    0.11
   3   6 -11    3.36    0.12
  -3  -6  11    3.50    0.14
  -3  -6  11    3.43    0.10
   4   6 -12   26.20    0.65
   4   6 -12   25.43    0.67
   4   6 -12   27.05    0.67
  -4  -6  12   27.00    0.70
   5   6 -13    1.61    0.07
   5   6 -13    1.62    0.10
   5   6 -13    1.56    0.07
  -5  -6  13    1.72    0.10
   6   6 -14   38.70    0.99
  -6  -6  14   40.20    1.01
   7   6 -15    0.17    0.06
  -7  -6  15    0.21    0.07
  -8  -6  16    6.50    0.23
   9   6 -17    3.69    0.16
  -9  -6  17    3.46    0.18
  10   6 -18    0.50    0.11
 -10  -6  18    0.45    0.10
 -12   7   3    0.13    0.07
  12  -7  -3    0.07    0.09
 -11   7   2    0.88    0.11
  11  -7  -2    0.84    0.13
 -10   7   1   10.41    0.32
  10  -7  -1   10.28    0.33
  -9   7   0    2.86    0.18
   9  -7   0    2.97    0.16
  -8   7  -1   60.01    1.50
   8  -7   1   59.67    1.50
  -7   7  -2   17.04    0.45
   7  -7   2   16.46    0.46
  -6   7  -3   36.05    0.90
   6  -7   3   35.58    0.91
  -5   7  -4    1.36    0.08
   5  -7   4    1.30    0.09
  -4   7  -5   26.75    0.66
  -4   7  -5   25.83    0.67
  -4   7  -5   24.93    0.66
   4  -7   5   27.02    0.67
  -3   7  -6    0.21    0.04
  -3   7  -6    0.28    0.06
  -3   7  -6    0.30    0.06
   3  -7   6    0.33    0.06
  -2   7  -7    1.08    0.07
  -2   7  -7    1.19    0.07
  -2   7  -7    1.07    0.09
   2  -7   7    1.07    0.09
  -1   7  -8    0.69    0.07
  -1   7  -8    0.64    0.06
   1  -7   8    0.56    0.08
   1  -7   8    0.62    0.08
   0   7  -9    5.23    0.15
   0  -7   9    5.07    0.16
   0  -7   9    5.14    0.16
   1   7 -10    5.35    0.15
   1   7 -10    5.03    0.15
  -1  -7  10    5.17    0.15
  -1  -7  10    5.12    0.16
   2   7 -11    1.93    0.07
   2   7 -11    1.86    0.08
  -2  -7  11    1.86    0.08
  -2  -7  11    1.98    0.10
   3   7 -12    0.64    0.05
   3   7 -12    0.56    0.05
  -3  -7  12    0.60    0.11
  -3  -7  12    0.65    0.05
   4   7 -13    9.62    0.28
   4   7 -13   10.10    0.27
   4   7 -13   10.65    0.28
  -4  -7  13   10.67    0.30
   5   7 -14    3.13    0.11
  -5  -7  14    3.14    0.14
  -6  -7  15    0.83    0.11
   7   7 -16    0.82    0.10
  -7  -7  16    1.18    0.12
   8   7 -17    0.15    0.06
  -8  -7  17    0.15    0.07
   9   7 -18    0.65    0.09
  -9  -7  18    0.51    0.09
  10   7 -19    0.72    0.11
 -10  -7  19    0.51    0.09
 -12   8   2    0.07    0.07
  12  -8  -2    0.15    0.09
 -11   8   1    1.90    0.13
  11  -8  -1    1.91    0.15
 -10   8   0   17.01    0.48
  10  -8   0   17.25    0.50
  -9   8  -1    0.16    0.06
   9  -8   1    0.19    0.08
  -8   8  -2    4.93    0.19
   8  -8   2    5.09    0.20
  -7   8  -3    0.23    0.06
   7  -8   3    0.21    0.08
  -6   8  -4   28.35    0.72
   6  -8   4   28.02    0.73
  -5   8  -5    1.01    0.08
   5  -8   5    0.90    0.09
  -4   8  -6    1.12    0.10
  -4   8  -6    1.02    0.07
  -4   8  -6    0.90    0.07
   4  -8   6    1.01    0.10
  -3   8  -7    1.32    0.08
  -3   8  -7    1.30    0.07
  -3   8  -7    1.45    0.10
  -2   8  -8    0.67    0.06
  -2   8  -8    0.69    0.09
  -2   8  -8    0.70    0.05
   2  -8   8    0.75    0.08
   2  -8   8    0.69    0.09
  -1   8  -9    0.39    0.05
  -1   8  -9    0.36    0.05
   1  -8   9    0.37    0.08
   1  -8   9    0.34    0.07
   0   8 -10    1.50    0.07
   0   8 -10    1.46    0.07
   0  -8  10    1.36    0.09
   0  -8  10    1.53    0.16
   1   8 -11    7.52    0.21
   1   8 -11    8.28    0.21
  -1  -8  11    7.95    0.24
  -1  -8  11    7.83    0.22
   2   8 -12    0.86    0.05
   2   8 -12    0.79    0.05
  -2  -8  12    0.87    0.07
   3   8 -13    3.94    0.14
   3   8 -13    4.02    0.12
  -3  -8  13    3.75    0.12
  -3  -8  13    3.88    0.15
   4   8 -14    1.12    0.07
  -4  -8  14    1.15    0.09
   5   8 -15    2.50    0.10
  -5  -8  15    2.30    0.12
   6   8 -16    6.60    0.20
  -6  -8  16    6.69    0.23
   7   8 -17    0.42    0.06
  -7  -8  17    0.52    0.07
  -9  -8  19    1.35    0.14
 -11   9   0    0.58    0.11
 -10   9  -1    0.98    0.10
  10  -9   1    0.91    0.14
  -9   9  -2    0.09    0.05
  -8   9  -3    0.04    0.06
   8  -9   3    0.07    0.07
  -7   9  -4   16.33    0.45
   7  -9   4   16.65    0.46
  -6   9  -5    0.18    0.05
   6  -9   5    0.14    0.07
  -5   9  -6   22.81    0.66
  -5   9  -6   26.25    0.65
   5  -9   6   26.65    0.66
  -4   9  -7    2.79    0.11
  -4   9  -7    2.98    0.11
  -4   9  -7    3.06    0.14
   4  -9   7    3.18    0.13
  -3   9  -8   17.28    0.43
  -3   9  -8   16.55    0.45
  -3   9  -8   15.62    0.43
   3  -9   8   16.85    0.44
  -2   9  -9    3.09    0.10
  -2   9  -9    3.14    0.10
  -2   9  -9    2.96    0.14
   2  -9   9    3.21    0.14
   2  -9   9    2.87    0.18
  -1   9 -10    7.73    0.21
  -1   9 -10    8.15    0.21
   1  -9  10    7.66    0.26
   1  -9  10    8.07    0.24
   0   9 -11   20.08    0.49
   0   9 -11   19.07    0.49
   0  -9  11   20.02    0.51
   0  -9  11   19.14    0.53
   1   9 -12    5.63    0.16
   1   9 -12    5.29    0.17
  -1  -9  12    5.77    0.18
   2   9 -13   11.80    0.31
  -2  -9  13   12.13    0.34
   3   9 -14    1.39    0.06
  -3  -9  14    1.35    0.08
  -3  -9  14    1.37    0.10
   4   9 -15   18.88    0.48
  -4  -9  15   18.47    0.50
   5   9 -16    8.88    0.25
  -5  -9  16    9.32    0.28
   6   9 -17    1.95    0.08
  -6  -9  17    1.88    0.13
   7   9 -18    0.68    0.07
  -7  -9  18    0.50    0.11
 -11  10  -1    0.01    0.07
  11 -10   1   -0.04    0.09
 -10  10  -2    0.23    0.06
  10 -10   2    0.11    0.08
  -9  10  -3    2.39    0.13
   9 -10   3    2.38    0.17
  -8  10  -4    1.36    0.11
   8 -10   4    1.60    0.14
  -7  10  -5    1.98    0.11
   7 -10   5    1.81    0.14
  -6  10  -6    2.86    0.12
   6 -10   6    2.64    0.14
  -5  10  -7    3.67    0.13
   5 -10   7    3.49    0.16
  -4  10  -8    6.43    0.23
  -4  10  -8    6.91    0.20
   4 -10   8    6.74    0.22
  -3  10  -9    1.56    0.08
  -3  10  -9    1.73    0.12
   3 -10   9    1.58    0.12
   3 -10   9    1.58    0.11
  -2  10 -10   12.68    0.36
  -2  10 -10   12.91    0.33
   2 -10  10   12.21    0.35
   2 -10  10   12.84    0.35
  -1  10 -11    1.22    0.06
   1 -10  11    1.35    0.10
   1 -10  11    1.34    0.11
   0  10 -12   33.12    0.82
   0 -10  12   33.19    0.84
   0 -10  12   32.95    0.84
   1  10 -13    1.74    0.07
  -1 -10  13    1.67    0.11
  -1 -10  13    1.66    0.09
   2  10 -14   34.59    0.84
  -2 -10  14   33.25    0.86
  -2 -10  14   33.53    0.85
   3  10 -15    0.70    0.05
  -3 -10  15    0.50    0.08
   4  10 -16    2.54    0.09
  -4 -10  16    2.42    0.13
   5  10 -17    0.23    0.05
  -5 -10  17    0.27    0.09
 -10  11  -3    0.00    0.06
  10 -11   3   -0.09    0.09
  -9  11  -4    1.10    0.10
   9 -11   4    1.04    0.14
  -8  11  -5    0.68    0.09
   8 -11   5    0.69    0.15
  -7  11  -6    0.58    0.07
   7 -11   6    0.73    0.11
  -6  11  -7    0.02    0.04
   6 -11   7    0.10    0.06
  -5  11  -8    1.37    0.08
   5 -11   8    1.54    0.11
  -4  11  -9   15.04    0.44
  -4  11  -9   15.53    0.40
   4 -11   9   15.14    0.42
   4 -11   9   15.33    0.43
  -3  11 -10    4.78    0.22
  -3  11 -10    5.13    0.15
   3 -11  10    5.26    0.18
   3 -11  10    5.19    0.19
  -2  11 -11    1.83    0.07
   2 -11  11    1.92    0.12
   2 -11  11    1.74    0.11
  -1  11 -12    1.77    0.07
   1 -11  12    1.71    0.11
   1 -11  12    1.98    0.11
   0  11 -13    0.72    0.04
   0 -11  13    0.77    0.08
   0 -11  13    0.72    0.09
   1  11 -14    1.27    0.06
  -1 -11  14    1.54    0.11
  -1 -11  14    1.46    0.09
  -2 -11  15    1.71    0.12
  -9  12  -5    0.56    0.09
   9 -12   5    0.85    0.12
  -8  12  -6   12.72    0.36
   8 -12   6   12.66    0.39
  -7  12  -7    2.34    0.13
   7 -12   7    2.75    0.14
  -6  12  -8    4.07    0.14
   6 -12   8    4.06    0.18
   6 -12   8    4.24    0.20
  -5  12  -9    0.76    0.06
   5 -12   9    0.51    0.10
   5 -12   9    0.93    0.12
  -4  12 -10    2.56    0.09
  -4  12 -10    2.50    0.15
   4 -12  10    2.65    0.16
   4 -12  10    2.40    0.13
  -3  12 -11    0.59    0.12
  -3  12 -11    0.61    0.05
   3 -12  11    0.54    0.10
   3 -12  11    0.78    0.10
  -2  12 -12    0.37    0.09
   2 -12  12    0.39    0.08
   2 -12  12    0.33    0.07
  -1  12 -13   11.12    0.34
   1 -12  13   10.79    0.32
   0 -12  14   15.68    0.43
  -8  13  -7    0.46    0.08
   7 -13   8    1.09    0.14
   6 -13   9    0.46    0.09
   5 -13  10    2.67    0.16
  -4  13 -11    0.74    0.12
  -3  13 -12    2.78    0.16
   3 -13  12    2.52    0.18
  -2  13 -13    1.11    0.12
   2 -13  13    1.02    0.10
  -1  13 -14    1.56    0.13
   1 -13  14    1.47    0.10
   6 -14  10   -0.01    0.08
   5 -14  11    3.50    0.18
  -4  14 -12    0.57    0.09
   4 -14  12    0.39    0.08
  -3  14 -13    1.40    0.14
   3 -14  13    1.63    0.14
  -2  14 -14    2.81    0.17
   2 -14  14    2.99    0.17
  -1  14 -15    0.09    0.08
   0  14 -16    0.04    0.08
   1 -16  11    0.12    0.07
  -1  16 -11    0.23    0.10
   2 -16  10    0.02    0.08
   3 -16   9    0.02    0.08
   3  15 -14    1.09    0.14
   2  15 -13    0.14    0.08
  -1 -15  12    0.03    0.08
   1  15 -12   -0.02    0.08
   0 -15  11    0.20    0.07
   0  15 -11    0.10    0.08
   1 -15  10    1.21    0.12
  -1  15 -10    1.05    0.13
   2 -15   9    1.00    0.12
  -2  15  -9    1.12    0.13
   3 -15   8    1.25    0.13
   4 -15   7    0.88    0.13
   5 -15   6    1.65    0.15
   6 -15   5    0.18    0.09
  -2 -14  12    3.49    0.15
   2  14 -12    3.59    0.17
  -1 -14  11    0.34    0.07
   1  14 -11    0.45    0.08
   0 -14  10    0.96    0.11
   0  14 -10    0.66    0.09
  -1  14  -9    2.65    0.15
   2 -14   8    1.10    0.12
  -2  14  -8    1.13    0.13
   3 -14   7    0.62    0.12
   4 -14   6    0.88    0.13
   5 -14   5    0.44    0.09
   6 -14   4    0.22    0.09
   7 -14   3    0.69    0.14
   8 -14   2    0.43    0.10
  -3 -13  12    0.67    0.08
  -2 -13  11    6.41    0.21
   2  13 -11    6.43    0.23
  -1 -13  10    2.54    0.13
   1  13 -10    2.47    0.14
   0 -13   9    1.07    0.10
   0  13  -9    1.19    0.12
   1 -13   8    8.79    0.27
  -1  13  -8    8.59    0.28
   2 -13   7    1.69    0.13
  -2  13  -7    1.72    0.13
   4 -13   5    2.98    0.17
   5 -13   4    0.26    0.08
   6 -13   3    0.92    0.14
   7 -13   2    0.95    0.14
   8 -13   1    0.42    0.10
   9 -13   0    2.24    0.18
  -4 -12  12    5.28    0.17
  -3 -12  11    1.38    0.09
  -2 -12  10    0.51    0.09
   1  12  -9    0.47    0.10
   0 -12   8    9.48    0.29
   0  12  -8   10.14    0.30
   1 -12   7    3.05    0.15
  -1  12  -7    3.29    0.16
   2 -12   6    1.01    0.12
   2 -12   6    1.01    0.09
  -2  12  -6    0.97    0.13
   3 -12   5    1.70    0.14
   4 -12   4    6.78    0.21
   4 -12   4    6.75    0.23
   5 -12   3    0.19    0.07
   5 -12   3    0.30    0.06
  -5  12  -3    0.33    0.05
   6 -12   2    0.08    0.07
   6 -12   2    0.04    0.06
  -6  12  -2    0.08    0.03
   7 -12   1    0.33    0.08
   7 -12   1    0.66    0.13
  -7  12  -1    0.32    0.07
   8 -12   0    9.82    0.33
   8 -12   0    9.53    0.30
  -8  12   0    9.51    0.28
   9 -12  -1    0.70    0.14
  -9  12   1    0.58    0.09
  10 -12  -2    0.03    0.09
 -10  12   2    0.29    0.06
  -5 -11  12    0.96    0.07
  -4 -11  11    3.25    0.13
  -3 -11  10    3.31    0.13
  -2 -11   9    0.10    0.06
  -2 -11   9    0.02    0.04
  -1 -11   8   10.63    0.30
  -1 -11   8   10.06    0.28
   1  11  -8   10.29    0.30
   0 -11   7    0.97    0.07
   0 -11   7    1.07    0.10
   0  11  -7    1.06    0.11
   1 -11   6   12.95    0.35
   1 -11   6   12.76    0.37
  -1  11  -6   13.68    0.38
   2 -11   5    0.60    0.07
   2 -11   5    0.70    0.11
  -2  11  -5    0.54    0.10
   3 -11   4   10.76    0.32
   3 -11   4   10.74    0.30
  -3  11  -4   10.61    0.27
   4 -11   3    0.04    0.06
   4 -11   3    0.07    0.08
  -4  11  -3    0.03    0.02
   5 -11   2    3.60    0.18
   5 -11   2    3.64    0.15
  -5  11  -2    3.47    0.12
   6 -11   1    0.15    0.10
   6 -11   1    0.22    0.06
  -6  11  -1    0.28    0.06
   7 -11   0    0.22    0.07
  -7  11   0    0.24    0.05
   8 -11  -1    2.10    0.14
   9 -11  -2    0.11    0.08
  -9  11   2    0.21    0.06
  10 -11  -3    4.79    0.21
 -10  11   3    4.83    0.18
  -5 -10  11    0.38    0.07
  -5 -10  11    0.21    0.07
  -4 -10  10   14.35    0.39
  -4 -10  10   14.87    0.39
  -3 -10   9    0.08    0.04
  -3 -10   9    0.03    0.05
  -2 -10   8    0.28    0.06
  -2 -10   8    0.44    0.06
  -1 -10   7    8.40    0.24
  -1 -10   7    8.89    0.26
   0 -10   6    4.10    0.15
   0 -10   6    4.17    0.13
   0  10  -6    4.01    0.16
   1 -10   5    1.26    0.07
   1 -10   5    1.31    0.10
  -1  10  -5    1.36    0.10
   2 -10   4   11.33    0.31
   2 -10   4   11.31    0.33
  -2  10  -4   11.21    0.32
   3 -10   3    0.59    0.10
   3 -10   3    0.48    0.08
   4 -10   2    1.34    0.12
  -4  10  -2    1.53    0.06
  -4  10  -2    1.25    0.09
   5 -10   1    0.14    0.08
   5 -10   1    0.12    0.05
  -5  10  -1    0.11    0.04
   6 -10   0   11.55    0.34
  -6  10   0   11.71    0.32
   7 -10  -1   15.89    0.45
  -7  10   1   15.92    0.43
   8 -10  -2    3.63    0.17
  -8  10   2    3.70    0.15
  -9  10   3    0.10    0.06
  10 -10  -4    0.61    0.13
 -10  10   4    0.57    0.10
  11 -10  -5    0.60    0.11
 -11  10   5    0.92    0.12
  -7  -9  12    0.47    0.09
   7   9 -12    0.49    0.05
  -6  -9  11   16.39    0.45
   6   9 -11   16.78    0.42
  -5  -9  10    0.84    0.10
   5   9 -10    0.76    0.03
  -4  -9   9   17.68    0.46
  -4  -9   9   17.51    0.46
  -3  -9   8    4.53    0.15
  -3  -9   8    4.69    0.15
  -2  -9   7    3.45    0.13
  -2  -9   7    3.51    0.12
  -1  -9   6    3.25    0.13
  -1  -9   6    3.25    0.11
   0  -9   5   12.03    0.33
   0  -9   5   11.68    0.31
   0   9  -5   11.66    0.33
   1  -9   4    0.02    0.05
   1  -9   4    0.07    0.04
  -1   9  -4    0.04    0.05
   2  -9   3   39.55    1.00
   2  -9   3   40.02    0.99
  -2   9  -3   40.00    1.00
  -2   9  -3   39.39    0.97
  -2   9  -3   40.27    0.97
   3  -9   2    2.84    0.11
   3  -9   2    2.80    0.13
  -3   9  -2    2.87    0.09
   4  -9   1    0.25    0.06
   4  -9   1    0.16    0.06
  -4   9  -1    0.31    0.05
  -4   9  -1    0.29    0.05
   5  -9   0    1.53    0.10
  -5   9   0    1.39    0.08
  -5   9   0    1.43    0.08
   6  -9  -1    0.27    0.07
  -6   9   1    0.34    0.07
   7  -9  -2    4.73    0.19
  -7   9   2    4.79    0.17
   8  -9  -3    0.15    0.07
  -8   9   3    0.18    0.06
   9  -9  -4    0.18    0.08
  -9   9   4    0.16    0.06
  10  -9  -5    1.31    0.14
 -10   9   5    1.25    0.11
  11  -9  -6    0.39    0.09
 -11   9   6    0.59    0.12
  10   8 -14    1.56    0.12
  -9  -8  13    6.65    0.23
   9   8 -13    6.53    0.20
  -8  -8  12    0.35    0.06
   8   8 -12    0.25    0.04
  -7  -8  11    3.39    0.14
  -6  -8  10   55.09    1.37
   6   8 -10   54.79    1.35
  -5  -8   9    2.95    0.13
  -4  -8   8    0.07    0.05
  -4  -8   8    0.08    0.04
  -3  -8   7    2.20    0.10
  -3  -8   7    2.18    0.09
  -2  -8   6    1.63    0.07
  -2  -8   6    1.80    0.09
  -1  -8   5    0.27    0.03
  -1  -8   5    0.20    0.03
  -1  -8   5    0.20    0.05
   0  -8   4   13.79    0.37
   0  -8   4   14.24    0.36
   0  -8   4   13.48    0.35
   0   8  -4   14.31    0.37
   1  -8   3    1.47    0.10
   1  -8   3    1.51    0.07
  -1   8  -3    1.51    0.09
   2  -8   2    0.38    0.06
   2  -8   2    0.44    0.07
  -2   8  -2    0.46    0.04
  -2   8  -2    0.43    0.04
   3  -8   1    0.65    0.07
   3  -8   1    0.76    0.09
  -3   8  -1    0.65    0.05
  -3   8  -1    0.71    0.06
   4  -8   0    3.26    0.13
  -4   8   0    3.11    0.11
  -4   8   0    3.03    0.11
   5  -8  -1    2.14    0.12
  -5   8   1    2.03    0.09
  -5   8   1    1.82    0.09
   6  -8  -2    6.99    0.23
  -6   8   2    6.80    0.21
   7  -8  -3    7.52    0.24
  -7   8   3    7.25    0.23
   8  -8  -4    0.96    0.12
  -8   8   4    0.87    0.10
   9  -8  -5    4.20    0.19
  -9   8   5    4.19    0.17
  10  -8  -6    0.79    0.13
 -10   8   6    0.43    0.08
  11  -8  -7    0.92    0.14
 -11   8   7    1.39    0.11
  12  -8  -8    0.45    0.10
 -12   8   8    0.43    0.08
  11   7 -14    0.10    0.05
 -10  -7  13    0.21    0.06
  10   7 -13    0.14    0.05
  -9  -7  12    0.64    0.09
   9   7 -12    0.51    0.08
  -8  -7  11   10.55    0.32
   8   7 -11   10.85    0.30
  -7  -7  10    0.84    0.09
   7   7 -10    0.86    0.07
  -6  -7   9    1.48    0.10
   6   7  -9    1.46    0.07
   6   7  -9    1.41    0.07
  -5  -7   8   17.52    0.46
   5   7  -8   17.92    0.46
   5   7  -8   17.75    0.45
  -4  -7   7    0.58    0.07
  -4  -7   7    0.59    0.06
   4   7  -7    0.71    0.04
   4   7  -7    0.63    0.04
  -3  -7   6   30.04    0.74
  -3  -7   6   29.70    0.75
  -2  -7   5    1.01    0.06
  -2  -7   5    1.01    0.08
  -2  -7   5    1.14    0.06
  -1  -7   4   13.56    0.35
  -1  -7   4   14.05    0.36
  -1  -7   4   13.42    0.34
   0  -7   3   37.74    1.00
   0  -7   3   40.56    0.98
   0  -7   3   39.63    0.98
   0   7  -3   41.58    0.99
   1  -7   2    1.72    0.11
   1  -7   2    1.82    0.08
   1  -7   2    1.64    0.08
  -1   7  -2    1.74    0.10
   2  -7   1    1.97    0.11
   2  -7   1    1.94    0.08
   2  -7   1    1.86    0.09
  -2   7  -1    1.93    0.07
   3  -7   0    0.80    0.07
   3  -7   0    0.61    0.08
  -3   7   0    0.78    0.06
  -3   7   0    0.69    0.07
   4  -7  -1    8.41    0.24
  -4   7   1    8.63    0.23
  -4   7   1    7.80    0.23
   5  -7  -2    7.45    0.22
  -5   7   2    6.82    0.21
  -5   7   2    7.40    0.21
   6  -7  -3    0.53    0.09
  -6   7   3    0.43    0.07
   7  -7  -4   10.41    0.31
  -7   7   4   10.13    0.30
   8  -7  -5    1.02    0.12
  -8   7   5    0.92    0.11
   9  -7  -6    0.22    0.08
  -9   7   6    0.27    0.07
  10  -7  -7    8.56    0.30
 -10   7   7    8.59    0.28
  11  -7  -8    0.13    0.08
 -11   7   8    0.05    0.07
  12  -7  -9    0.24    0.09
 -12   7   9    0.15    0.08
 -11  -6  13    1.52    0.15
  11   6 -13    1.57    0.11
 -10  -6  12    0.18    0.07
  10   6 -12    0.28    0.06
  -9  -6  11    0.48    0.10
   9   6 -11    0.49    0.09
  -8  -6  10    5.32    0.19
   8   6 -10    5.32    0.18
  -7  -6   9    4.01    0.15
   7   6  -9    4.12    0.14
   6   6  -8    3.41    0.12
   6   6  -8    3.11    0.11
  -5  -6   7    7.12    0.21
   5   6  -7    7.28    0.20
   5   6  -7    7.42    0.20
  -4  -6   6   21.92    0.57
  -4  -6   6   22.56    0.56
   4   6  -6   22.37    0.55
   4   6  -6   22.79    0.56
  -3  -6   5   24.00    0.61
  -3  -6   5   24.58    0.62
  -3  -6   5   24.70    0.62
   3   6  -5   24.22    0.62
   3   6  -5   25.22    0.60
   3   6  -5   25.35    0.60
  -2  -6   4   23.62    0.57
  -2  -6   4   22.26    0.57
  -2  -6   4   22.97    0.58
   2   6  -4   23.06    0.58
  -1  -6   3    4.87    0.14
  -1  -6   3    5.47    0.14
  -1  -6   3    5.49    0.16
   1   6  -3    5.42    0.16
   0  -6   2   17.86    0.43
   0  -6   2   17.50    0.43
   0  -6   2   17.04    0.45
   0   6  -2   17.24    0.46
   0   6  -2   17.54    0.45
   1  -6   1   10.97    0.28
   1  -6   1   11.19    0.30
   1  -6   1   11.25    0.28
  -1   6  -1   10.66    0.30
   2  -6   0   25.50    0.63
   2  -6   0   24.87    0.63
  -2   6   0   25.38    0.62
  -2   6   0   25.17    0.62
   3  -6  -1    2.02    0.10
  -3   6   1    1.90    0.09
  -3   6   1    2.02    0.09
   4  -6  -2   32.72    0.83
  -4   6   2   34.43    0.82
  -4   6   2   31.66    0.82
   5  -6  -3    3.89    0.15
  -5   6   3    3.82    0.14
  -5   6   3    3.67    0.14
   6  -6  -4    1.00    0.09
  -6   6   4    0.83    0.08
   7  -6  -5   20.12    0.54
  -7   6   5   20.38    0.54
   8  -6  -6    1.74    0.13
  -8   6   6    1.70    0.11
   9  -6  -7    2.38    0.15
  -9   6   7    2.22    0.16
  10  -6  -8    3.39    0.18
 -10   6   8    3.43    0.17
  11  -6  -9    1.71    0.15
 -11   6   9    1.31    0.13
  12  -6 -10    0.79    0.16
 -12   6  10    0.72    0.12
 -12  -5  13    0.29    0.08
  12   5 -13    0.08    0.07
 -11  -5  12    0.74    0.12
  11   5 -12    0.57    0.10
 -10  -5  11    0.07    0.07
  10   5 -11    0.04    0.06
  -9  -5  10    0.68    0.11
   9   5 -10    0.79    0.10
  -8  -5   9    4.21    0.16
   8   5  -9    4.16    0.16
  -7  -5   8    5.81    0.18
   7   5  -8    5.10    0.16
   7   5  -8    5.94    0.18
   6   5  -7    0.27    0.06
   6   5  -7    0.23    0.05
  -5  -5   6    5.29    0.17
   5   5  -6    5.41    0.16
   5   5  -6    5.43    0.16
  -4  -5   5   27.25    0.67
   4   5  -5   25.56    0.67
   4   5  -5   27.41    0.66
   4   5  -5   27.26    0.66
  -3  -5   4    0.81    0.06
  -3  -5   4    0.78    0.06
  -3  -5   4    0.81    0.07
   3   5  -4    0.76    0.07
   3   5  -4    0.83    0.05
   3   5  -4    0.83    0.05
  -2  -5   3    2.45    0.08
  -2  -5   3    2.45    0.08
  -2  -5   3    2.45    0.09
   2   5  -3    2.47    0.09
  -1  -5   2    1.94    0.08
  -1  -5   2    1.94    0.06
   1   5  -2    1.91    0.08
   0  -5   1    1.76    0.08
   0  -5   1    1.81    0.05
   0   5  -1    1.78    0.08
   0   5  -1    1.76    0.08
   1  -5   0    3.88    0.11
   1  -5   0    3.87    0.11
   1  -5   0    3.79    0.12
   1  -5   0    3.86    0.13
  -1   5   0    3.89    0.10
  -1   5   0    3.89    0.10
   2  -5  -1   17.55    0.45
   2  -5  -1   17.94    0.44
   2  -5  -1   17.55    0.44
   2  -5  -1   17.15    0.45
  -2   5   1   17.79    0.44
  -2   5   1   17.80    0.44
   3  -5  -2   17.03    0.43
   3  -5  -2   16.24    0.43
  -3   5   2   17.23    0.43
  -3   5   2   16.75    0.43
   4  -5  -3   27.93    0.70
  -4   5   3   28.58    0.70
  -4   5   3   27.01    0.70
   5  -5  -4    0.64    0.09
  -5   5   4    0.53    0.07
  -5   5   4    0.69    0.08
   6  -5  -5    0.97    0.09
  -6   5   5    0.89    0.08
   7  -5  -6    2.43    0.13
  -7   5   6    2.37    0.12
   8  -5  -7    0.21    0.07
  -8   5   7    0.23    0.06
   9  -5  -8    0.54    0.12
  10  -5  -9    8.40    0.29
 -10   5   9    8.59    0.28
  11  -5 -10    1.81    0.15
 -11   5  10    1.50    0.13
  12  -5 -11    0.45    0.09
 -12   5  11    0.79    0.12
 -12  -4  12    0.33    0.08
  12   4 -12    0.37    0.08
 -11  -4  11    0.14    0.08
  11   4 -11    0.04    0.06
 -10  -4  10    0.37    0.07
  10   4 -10    0.34    0.08
  -9  -4   9    3.94    0.17
   9   4  -9    3.92    0.15
  -8  -4   8    2.38    0.13
   8   4  -8    2.41    0.12
  -7  -4   7    1.08    0.08
   7   4  -7    1.03    0.08
   7   4  -7    0.98    0.06
   6   4  -6    2.04    0.09
   6   4  -6    1.85    0.09
  -5  -4   5   12.76    0.34
   5   4  -5   13.20    0.34
   5   4  -5   12.86    0.35
   5   4  -5   12.92    0.35
  -4  -4   4    0.23    0.05
  -4  -4   4    0.23    0.04
   4   4  -4    0.30    0.06
   4   4  -4    0.18    0.04
   4   4  -4    0.31    0.06
  -3  -4   3   92.70    2.30
  -3  -4   3   94.33    2.30
  -3  -4   3   97.76    2.30
   3   4  -3   92.12    2.29
   3   4  -3   95.85    2.30
  -2  -4   2   66.22    1.55
  -2  -4   2   59.14    1.55
  -2  -4   2   64.81    1.56
   2   4  -2   65.56    1.56
  -1  -4   1    1.28    0.07
   1   4  -1    1.37    0.07
   0  -4   0  481.38   11.03
   0  -4   0  469.77   11.11
   0   4   0  424.16   11.08
   0   4   0  450.07   11.10
   1  -4  -1    1.46    0.06
   1  -4  -1    1.40    0.08
   1  -4  -1    1.36    0.07
   1  -4  -1    1.36    0.05
  -1   4   1    1.44    0.05
  -1   4   1    1.39    0.05
   2  -4  -2   66.05    1.62
   2  -4  -2   66.96    1.62
  -2   4   2   67.49    1.62
  -2   4   2   65.46    1.62
   3  -4  -3   94.73    2.31
   3  -4  -3   93.83    2.31
  -3   4   3   94.14    2.31
  -3   4   3   97.19    2.31
   4  -4  -4    0.17    0.06
  -4   4   4    0.16    0.06
  -4   4   4    0.20    0.05
   5  -4  -5   13.47    0.37
  -5   4   5   13.61    0.36
   6  -4  -6    1.94    0.11
  -6   4   6    1.88    0.10
   7  -4  -7    0.98    0.10
  -7   4   7    1.06    0.09
   8  -4  -8    2.39    0.13
  -8   4   8    2.22    0.13
   9  -4  -9    4.10    0.18
  -9   4   9    3.99    0.19
  10  -4 -10    0.39    0.09
 -10   4  10    0.36    0.08
  11  -4 -11    0.11    0.08
 -11   4  11   -0.01    0.07
  12  -4 -12    0.36    0.10
 -12   4  12    0.15    0.08
  13   3 -12    0.38    0.09
 -12  -3  11    2.68    0.16
  12   3 -11    2.81    0.16
 -11  -3  10    1.22    0.14
  11   3 -10    0.91    0.12
 -10  -3   9    0.32    0.07
  -9  -3   8    1.37    0.11
   9   3  -8    1.38    0.11
  -8  -3   7    1.35    0.11
   8   3  -7    1.30    0.10
  -7  -3   6    2.81    0.12
   7   3  -6    2.92    0.12
   6   3  -5    0.36    0.06
   6   3  -5    0.48    0.07
  -5  -3   4   84.35    1.98
   5   3  -4   80.46    1.97
   5   3  -4   77.82    1.97
  -4  -3   3    2.86    0.11
  -4  -3   3    2.92    0.11
   4   3  -3    2.97    0.10
   4   3  -3    2.91    0.10
   4   3  -3    2.96    0.10
  -3  -3   2   83.03    2.01
  -3  -3   2   80.14    2.01
   3   3  -2   83.57    2.01
   3   3  -2   83.91    2.01
  -2  -3   1    4.92    0.13
  -2  -3   1    4.44    0.13
  -2  -3   1    4.91    0.13
   2   3  -1    4.85    0.12
   2   3  -1    4.91    0.12
   2   3  -1    4.57    0.13
  -1  -3   0  284.58    6.79
   1   3   0  272.59    6.78
   0  -3  -1  549.94   12.72
   0  -3  -1  493.07   12.72
   0   3   1  529.88   12.73
   1  -3  -2  158.79    4.15
   1  -3  -2  156.35    4.15
   1  -3  -2  173.78    4.19
  -1   3   2  178.11    4.17
  -1   3   2  187.58    4.16
   2  -3  -3    6.10    0.17
   2  -3  -3    6.40    0.17
  -2   3   3    6.51    0.17
  -2   3   3    6.56    0.17
   3  -3  -4   26.19    0.66
   3  -3  -4   27.02    0.66
  -3   3   4   26.30    0.66
  -3   3   4   26.56    0.66
   4  -3  -5   18.13    0.46
  -4   3   5   17.35    0.46
   5  -3  -6   16.20    0.43
  -5   3   6   16.01    0.43
   6  -3  -7   20.28    0.55
  -6   3   7   21.36    0.54
   7  -3  -8    5.10    0.18
  -7   3   8    5.22    0.18
   8  -3  -9    3.08    0.15
  -8   3   9    2.97    0.15
   9  -3 -10    4.16    0.17
  -9   3  10    4.10    0.18
  10  -3 -11    7.00    0.26
 -10   3  11    7.24    0.25
  11  -3 -12    0.68    0.13
 -11   3  12    0.89    0.12
 -12   3  13    1.24    0.13
 -13  -2  11    3.63    0.19
  13   2 -11    3.64    0.18
 -12  -2  10    0.14    0.08
  12   2 -10    0.36    0.08
 -11  -2   9   -0.03    0.07
  11   2  -9    0.14    0.07
 -10  -2   8    3.96    0.18
  -9  -2   7    3.38    0.15
   9   2  -7    3.33    0.15
  -8  -2   6    0.25    0.06
   8   2  -6    0.21    0.06
  -7  -2   5    0.71    0.08
   7   2  -5    0.79    0.08
  -6  -2   4    6.58    0.23
   6   2  -4    6.90    0.20
   6   2  -4    6.50    0.20
  -5  -2   3   67.62    1.68
   5   2  -3   69.34    1.68
  -4  -2   2   69.28    1.71
  -4  -2   2   70.44    1.71
   4   2  -2   70.91    1.71
   4   2  -2   70.41    1.71
  -3  -2   1    3.20    0.10
  -3  -2   1    3.20    0.10
   3   2  -1    3.20    0.10
   3   2  -1    3.26    0.10
  -2  -2   0  750.52   17.65
  -2  -2   0  748.92   17.65
   2   2   0  732.62   17.67
   2   2   0  684.10   17.66
   2   2   0  730.42   17.64
  -1  -2  -1   39.36    0.94
  -1  -2  -1   38.54    0.95
   1   2   1   38.81    0.94
   1   2   1   39.14    0.95
   0  -2  -2   29.59    0.72
   0  -2  -2   28.44    0.72
   0   2   2   30.28    0.72
   0   2   2   29.70    0.72
   0   2   2   29.74    0.72
   1  -2  -3  984.53   23.70
   1  -2  -3  984.18   23.71
   1  -2  -3  971.13   23.72
   2  -2  -4  574.31   13.51
   2  -2  -4  565.62   13.51
  -2   2   4  526.33   13.49
  -2   2   4  557.58   13.50
   3  -2  -5   10.80    0.29
   3  -2  -5   11.04    0.29
  -3   2   5   10.91    0.29
  -3   2   5   10.68    0.29
   4  -2  -6   26.70    0.67
  -4   2   6   26.57    0.67
  -4   2   6   26.39    0.71
   5  -2  -7    3.38    0.14
  -5   2   7    3.44    0.14
   6  -2  -8    3.12    0.14
  -6   2   8    3.25    0.13
   7  -2  -9    0.64    0.09
  -7   2   9    0.57    0.09
   8  -2 -10   23.25    0.61
  -8   2  10   22.54    0.61
   9  -2 -11   -0.01    0.07
  -9   2  11    0.01    0.07
  10  -2 -12    3.83    0.18
 -10   2  12    3.47    0.17
  11  -2 -13    0.92    0.13
 -11   2  13    0.76    0.12
  12  -2 -14    0.48    0.09
 -12   2  14    0.26    0.08
 -13  -1  10    0.24    0.08
  13   1 -10    0.07    0.09
 -12  -1   9    2.95    0.17
  12   1  -9    2.91    0.17
 -11  -1   8    0.68    0.12
  11   1  -8    0.66    0.12
 -10  -1   7    0.01    0.06
  10   1  -7    0.00    0.07
  -9  -1   6    0.35    0.07
   9   1  -6    0.44    0.09
  -8  -1   5    0.17    0.05
   8   1  -5    0.15    0.05
  -7  -1   4   28.98    0.74
   7   1  -4   29.12    0.74
  -6  -1   3   11.76    0.32
   6   1  -3   11.52    0.33
   6   1  -3   11.32    0.32
  -5  -1   2   10.49    0.27
   5   1  -2    9.10    0.32
   5   1  -2    9.80    0.27
  -4  -1   1   15.24    0.38
  -4  -1   1   14.41    0.38
   4   1  -1   15.23    0.38
   4   1  -1   14.88    0.38
  -3  -1   0    6.01    0.17
  -3  -1   0    6.00    0.17
   3   1   0    6.21    0.17
   3   1   0    6.10    0.17
  -2  -1  -1   67.35    1.59
  -2  -1  -1   64.55    1.59
   2   1   1   64.42    1.59
   2   1   1   66.12    1.59
  -1  -1  -2  161.35    3.92
  -1  -1  -2  151.59    3.91
   1   1   2  169.70    3.91
   1   1   2  160.39    3.92
   1   1   2  160.14    3.91
   0  -1  -3  142.72    3.48
   0  -1  -3  142.65    3.48
   0   1   3  144.06    3.48
   0   1   3  141.54    3.48
   1  -1  -4   53.76    1.29
   1  -1  -4   53.25    1.29
   1  -1  -4   51.54    1.29
  -1   1   4   54.78    1.29
  -1   1   4   52.37    1.29
   2  -1  -5   91.58    2.19
   2  -1  -5   91.03    2.18
  -2   1   5   91.17    2.19
  -2   1   5   85.88    2.18
   3  -1  -6  270.95    6.62
   4  -1  -7   14.07    0.40
  -4   1   7   15.28    0.39
   5  -1  -8    5.24    0.17
  -5   1   8    5.06    0.18
   6  -1  -9   16.45    0.44
  -6   1   9   16.10    0.44
   7  -1 -10    1.61    0.11
  -7   1  10    1.68    0.11
   8  -1 -11    3.42    0.16
  -8   1  11    3.76    0.16
  -9   1  12    0.11    0.07
  10  -1 -13    0.97    0.14
 -10   1  13    0.80    0.12
  11  -1 -14   -0.01    0.08
 -11   1  14    0.14    0.08
  12  -1 -15   -0.07    0.08
 -12   1  15    0.13    0.08
 -13   0   9    0.25    0.08
  13   0  -9    0.37    0.09
 -12   0   8    2.41    0.15
  12   0  -8    2.19    0.15
 -11   0   7    0.04    0.07
  11   0  -7    0.01    0.07
 -10   0   6    0.06    0.07
  10   0  -6    0.09    0.07
  -9   0   5    0.05    0.06
   9   0  -5    0.17    0.06
  -8   0   4    0.75    0.09
   8   0  -4    0.68    0.09
  -7   0   3   -0.02    0.05
   7   0  -3    0.03    0.05
  -6   0   2   29.94    0.75
   6   0  -2   29.54    0.75
  -5   0   1    0.74    0.09
   5   0  -1    0.71    0.08
  -4   0   0   84.79    2.13
  -4   0   0   88.72    2.13
   4   0   0   89.50    2.13
   4   0   0   85.97    2.12
  -3   0  -1    4.46    0.13
  -3   0  -1    4.53    0.13
   3   0   1    4.53    0.13
   3   0   1    4.60    0.13
  -2   0  -2  511.48   12.55
  -2   0  -2  522.91   12.55
  -2   0  -2  505.76   12.51
   2   0   2  531.09   12.55
   2   0   2  514.66   12.55
  -1   0  -3    1.72    0.06
  -1   0  -3    1.73    0.06
   1   0   3    1.66    0.06
   1   0   3    1.75    0.06
   0   0  -4    3.04    0.09
   0   0  -4    2.97    0.09
   0   0   4    3.05    0.08
   0   0   4    2.97    0.09
   0   0   4    3.00    0.09
   1   0  -5    0.08    0.02
   1   0  -5    0.11    0.04
   1   0  -5    0.09    0.03
  -1   0   5    0.13    0.04
  -1   0   5    0.11    0.03
   2   0  -6    0.88    0.06
   2   0  -6    0.77    0.06
  -2   0   6    0.82    0.06
  -2   0   6    0.72    0.06
   3   0  -7    0.10    0.04
   3   0  -7    0.10    0.04
  -3   0   7    0.13    0.04
  -3   0   7    0.09    0.04
   4   0  -8   17.67    0.45
   4   0  -8   16.86    0.46
   5   0  -9    0.09    0.05
  -5   0   9   -0.01    0.05
   6   0 -10    5.87    0.19
  -6   0  10    6.01    0.20
   7   0 -11    0.17    0.06
  -7   0  11    0.17    0.06
   8   0 -12    1.57    0.12
  -8   0  12    1.52    0.11
   9   0 -13    1.29    0.15
  -9   0  13    1.26    0.12
  10   0 -14    1.27    0.13
 -10   0  14    1.31    0.13
  11   0 -15    0.08    0.07
 -11   0  15    0.14    0.08
  12   0 -16    2.88    0.17
 -12   0  16    2.76    0.17
 -13   1   8    0.65    0.10
  13  -1  -8    0.83    0.13
 -12   1   7    6.58    0.25
  12  -1  -7    6.90    0.25
 -11   1   6   15.59    0.45
  11  -1  -6   15.92    0.45
 -10   1   5    1.42    0.12
  10  -1  -5    1.42    0.12
  -9   1   4    0.98    0.10
   9  -1  -4    0.84    0.10
  -8   1   3    0.01    0.05
   8  -1  -3   -0.02    0.05
  -7   1   2    4.17    0.15
   7  -1  -2    4.21    0.15
  -6   1   1    6.73    0.21
   6  -1  -1    6.64    0.21
  -5   1   0    0.04    0.05
   5  -1   0    0.07    0.04
  -4   1  -1    0.39    0.06
  -4   1  -1    0.37    0.06
   4  -1   1    0.49    0.07
   4  -1   1    0.42    0.06
  -3   1  -2    4.40    0.14
  -3   1  -2    4.79    0.14
   3  -1   2    4.53    0.14
   3  -1   2    4.54    0.14
   3  -1   2    4.81    0.13
  -2   1  -3   57.83    1.38
  -2   1  -3   56.31    1.38
   2  -1   3   55.08    1.38
   2  -1   3   57.02    1.38
  -1   1  -4  222.20    5.37
  -1   1  -4  230.45    5.37
   1  -1   4  201.26    5.35
   1  -1   4  225.83    5.38
   0   1  -5   45.12    1.11
   0   1  -5   44.79    1.11
   0  -1   5   45.16    1.11
   0  -1   5   46.77    1.11
   1   1  -6   50.31    1.23
   1   1  -6   51.66    1.24
  -1  -1   6   49.51    1.24
  -1  -1   6   50.80    1.24
   2   1  -7    2.60    0.09
   2   1  -7    2.56    0.09
  -2  -1   7    2.67    0.10
  -2  -1   7    2.61    0.10
   3   1  -8   19.80    0.50
   3   1  -8   20.11    0.50
  -3  -1   8   19.48    0.50
  -3  -1   8   18.70    0.50
   4   1  -9    0.91    0.10
   4   1  -9    0.93    0.09
  -4  -1   9    0.85    0.12
   5   1 -10    0.72    0.08
  -5  -1  10    0.88    0.08
   6   1 -11   10.04    0.28
  -6  -1  11    9.70    0.29
   7   1 -12    7.37    0.23
  -7  -1  12    7.18    0.24
   8   1 -13    1.28    0.11
  -8  -1  13    1.32    0.13
   9   1 -14    0.04    0.07
  -9  -1  14    0.01    0.08
  10   1 -15    1.73    0.13
 -10  -1  15    1.72    0.14
  11   1 -16    0.14    0.08
 -11  -1  16   -0.01    0.07
  12   1 -17    0.05    0.08
 -12  -1  17    0.21    0.09
 -13   2   7    0.28    0.08
  13  -2  -7    0.11    0.08
 -12   2   6    6.84    0.25
  12  -2  -6    7.08    0.26
 -11   2   5    0.07    0.07
  11  -2  -5    0.17    0.08
 -10   2   4    7.82    0.26
  10  -2  -4    7.36    0.28
  -9   2   3    4.81    0.18
   9  -2  -3    4.81    0.19
  -8   2   2    2.44    0.12
   8  -2  -2    2.25    0.12
  -7   2   1    4.95    0.17
   7  -2  -1    4.83    0.17
  -6   2   0   16.40    0.44
   6  -2   0   16.73    0.44
  -5   2  -1    2.69    0.12
   5  -2   1    2.52    0.12
   5  -2   1    2.68    0.11
  -4   2  -2   12.68    0.33
  -4   2  -2   12.60    0.34
   4  -2   2   12.98    0.34
   4  -2   2   13.07    0.33
   4  -2   2   12.64    0.34
  -3   2  -3    0.88    0.06
  -3   2  -3    0.83    0.06
  -3   2  -3    0.87    0.06
   3  -2   3    0.92    0.06
   3  -2   3    0.81    0.06
  -2   2  -4    2.90    0.10
  -2   2  -4    2.82    0.10
   2  -2   4    2.89    0.10
   2  -2   4    2.76    0.09
  -1   2  -5  441.73   10.56
  -1   2  -5  427.33   10.56
   1  -2   5  421.80   10.55
   1  -2   5  444.98   10.57
   0   2  -6    1.29    0.07
   0   2  -6    1.34    0.06
   0  -2   6    1.34    0.07
   1   2  -7    1.23    0.06
   1   2  -7    1.26    0.07
  -1  -2   7    1.17    0.06
  -1  -2   7    1.20    0.07
   2   2  -8   55.54    1.40
   2   2  -8   58.75    1.40
  -2  -2   8   57.37    1.40
  -2  -2   8   57.62    1.41
   3   2  -9   39.14    0.96
   3   2  -9   39.92    0.99
  -3  -2   9   40.16    0.99
   4   2 -10   53.14    1.32
   4   2 -10   52.65    1.31
  -4  -2  10   52.91    1.31
   5   2 -11   12.75    0.35
  -5  -2  11   12.48    0.35
   6   2 -12   16.83    0.45
  -6  -2  12   16.56    0.45
   7   2 -13   11.26    0.33
  -7  -2  13   10.83    0.33
   8   2 -14   15.11    0.42
  -8  -2  14   14.85    0.43
   9   2 -15    0.63    0.12
  10   2 -16    0.53    0.11
 -10  -2  16    0.50    0.12
  11   2 -17    0.04    0.07
 -11  -2  17    0.03    0.09
 -13   3   6    1.61    0.14
  13  -3  -6    1.63    0.15
 -12   3   5    3.24    0.16
  12  -3  -5    2.96    0.17
 -11   3   4    3.59    0.17
  11  -3  -4    3.21    0.17
 -10   3   3   -0.04    0.07
  -9   3   2    3.50    0.15
   9  -3  -2    3.51    0.16
  -8   3   1    7.44    0.23
   8  -3  -1    7.05    0.23
  -7   3   0    0.28    0.05
   7  -3   0    0.27    0.05
  -6   3  -1    7.32    0.22
   6  -3   1    7.58    0.23
  -5   3  -2    6.32    0.20
   5  -3   2    6.34    0.20
   5  -3   2    6.09    0.20
  -4   3  -3   32.50    0.89
  -4   3  -3   36.66    0.88
   4  -3   3   36.32    0.89
   4  -3   3   36.58    0.88
  -3   3  -4    3.30    0.11
  -3   3  -4    3.31    0.12
  -3   3  -4    3.33    0.11
   3  -3   4    3.38    0.12
   3  -3   4    3.25    0.11
  -2   3  -5    6.66    0.18
  -2   3  -5    6.93    0.19
   2  -3   5    6.66    0.19
   2  -3   5    6.57    0.18
  -1   3  -6   63.31    1.56
  -1   3  -6   63.94    1.56
   1  -3   6   63.46    1.56
   1  -3   6   64.57    1.56
   0   3  -7    2.40    0.09
   0   3  -7    2.25    0.09
   0  -3   7    2.37    0.09
   0  -3   7    2.23    0.08
   1   3  -8    1.95    0.08
   1   3  -8    2.01    0.08
  -1  -3   8    2.03    0.06
  -1  -3   8    1.93    0.09
  -1  -3   8    1.93    0.09
   2   3  -9    9.24    0.26
   2   3  -9    9.54    0.26
  -2  -3   9    9.93    0.27
   3   3 -10   30.34    0.78
   3   3 -10   31.90    0.76
   3   3 -10   31.65    0.79
  -3  -3  10   31.52    0.79
   4   3 -11   23.84    0.63
   4   3 -11   23.79    0.59
   4   3 -11   24.58    0.62
  -4  -3  11   24.06    0.62
   5   3 -12    1.21    0.05
   5   3 -12    1.19    0.09
  -5  -3  12    1.25    0.10
   6   3 -13   32.43    0.82
   6   3 -13   30.24    0.79
  -6  -3  13   33.25    0.82
   7   3 -14    5.62    0.20
  -7  -3  14    5.52    0.20
   8   3 -15   31.59    0.82
  -8  -3  15   31.60    0.83
   9   3 -16    5.03    0.19
  -9  -3  16    4.36    0.23
  10   3 -17    1.02    0.11
 -10  -3  17    1.13    0.13
  11   3 -18    1.72    0.15
 -11  -3  18    1.68    0.17
 -13   4   5    0.65    0.12
  13  -4  -5    0.58    0.10
 -12   4   4    0.22    0.07
  12  -4  -4    0.13    0.08
 -11   4   3    0.13    0.07
  11  -4  -3    0.18    0.08
 -10   4   2    0.30    0.09
  -9   4   1    1.46    0.11
   9  -4  -1    1.70    0.13
  -8   4   0    0.75    0.09
   8  -4   0    0.83    0.11
  -7   4  -1    2.59    0.12
   7  -4   1    2.59    0.13
  -6   4  -2   37.47    0.94
   6  -4   2   37.31    0.94
  -5   4  -3    9.43    0.27
   5  -4   3    9.66    0.28
  -4   4  -4   49.46    1.17
  -4   4  -4   46.99    1.16
  -4   4  -4   43.98    1.20
   4  -4   4   47.88    1.17
  -3   4  -5   82.87    2.03
  -3   4  -5   82.05    2.03
  -3   4  -5   84.53    2.03
   3  -4   5   82.64    2.03
  -2   4  -6    0.31    0.06
  -2   4  -6    0.33    0.07
   2  -4   6    0.27    0.06
   2  -4   6    0.29    0.05
  -1   4  -7   51.08    1.24
  -1   4  -7   51.55    1.24
   1  -4   7   48.93    1.24
   1  -4   7   51.32    1.25
   0   4  -8   35.77    0.85
   0   4  -8   34.24    0.85
   0  -4   8   34.13    0.84
   0  -4   8   34.27    0.85
   0  -4   8   33.30    0.85
   1   4  -9   46.80    1.13
   1   4  -9   44.67    1.13
  -1  -4   9   45.88    1.12
  -1  -4   9   46.03    1.13
   2   4 -10   20.97    0.52
   2   4 -10   19.33    0.52
  -2  -4  10   20.62    0.52
  -2  -4  10   20.05    0.50
   3   4 -11   23.38    0.57
   3   4 -11   21.36    0.57
   3   4 -11   23.06    0.55
  -3  -4  11   21.58    0.59
   4   4 -12    0.27    0.05
   4   4 -12    0.34    0.04
   4   4 -12    0.28    0.05
  -4  -4  12    0.41    0.08
   5   4 -13   20.52    0.53
   5   4 -13   21.60    0.56
  -5  -4  13   21.79    0.56
   6   4 -14   17.43    0.45
   6   4 -14   15.08    0.41
  -6  -4  14   16.68    0.45
   7   4 -15    3.38    0.15
  -7  -4  15    3.42    0.16
   8   4 -16   -0.04    0.08
  -8  -4  16    0.07    0.07
   9   4 -17    0.86    0.12
  -9  -4  17    0.84    0.13
  10   4 -18    0.89    0.11
 -10  -4  18    1.03    0.13
  11   4 -19    0.63    0.13
 -11  -4  19    0.99    0.15
 -13   5   4    0.11    0.08
  13  -5  -4    0.06    0.09
 -12   5   3    1.97    0.14
  12  -5  -3    1.98    0.16
 -11   5   2    0.86    0.11
  11  -5  -2    0.74    0.13
 -10   5   1    0.01    0.06
  10  -5  -1    0.05    0.09
  -9   5   0    4.90    0.19
   9  -5   0    4.91    0.20
  -8   5  -1    1.58    0.10
   8  -5   1    1.63    0.12
  -7   5  -2    7.99    0.24
   7  -5   2    7.73    0.25
  -6   5  -3    8.34    0.25
   6  -5   3    8.33    0.25
  -5   5  -4    4.40    0.15
   5  -5   4    4.36    0.16
  -4   5  -5   40.14    1.03
  -4   5  -5   41.34    1.03
  -4   5  -5   42.69    1.03
  -3   5  -6  102.85    2.57
  -3   5  -6  107.18    2.57
  -3   5  -6  106.00    2.57
   3  -5   6  105.98    2.58
  -2   5  -7   51.31    1.27
   2  -5   7   52.12    1.28
  -1   5  -8    1.68    0.09
  -1   5  -8    1.81    0.09
   1  -5   8    1.71    0.11
   0   5  -9    8.13    0.23
   0  -5   9    8.17    0.24
   0  -5   9    7.99    0.22
   1   5 -10   79.24    1.93
   1   5 -10   78.74    1.93
  -1  -5  10   80.08    1.93
  -1  -5  10   77.86    1.92
   2   5 -11    2.64    0.10
   2   5 -11    2.84    0.10
  -2  -5  11    2.62    0.13
  -2  -5  11    2.75    0.08
   3   5 -12    0.11    0.03
   3   5 -12    0.14    0.04
  -3  -5  12    0.10    0.06
   4   5 -13    2.92    0.12
   4   5 -13    2.92    0.12
   4   5 -13    2.89    0.09
  -4  -5  13    3.06    0.13
   5   5 -14    0.43    0.04
   5   5 -14    0.44    0.08
  -5  -5  14    0.56    0.10
   6   5 -15   10.92    0.32
  -6  -5  15   11.32    0.33
   7   5 -16    3.65    0.15
  -7  -5  16    3.67    0.18
   8   5 -17    3.17    0.16
  -8  -5  17    3.47    0.17
   9   5 -18    0.25    0.07
  -9  -5  18    0.41    0.09
  10   5 -19   10.88    0.35
 -10  -5  19   11.76    0.37
 -13   6   3    0.18    0.07
  13  -6  -3    0.00    0.09
 -12   6   2    3.56    0.17
  12  -6  -2    3.36    0.19
 -11   6   1    8.35    0.28
  11  -6  -1    8.18    0.29
 -10   6   0    0.15    0.07
  10  -6   0    0.11    0.08
  -9   6  -1   16.41    0.46
   9  -6   1   16.58    0.47
  -8   6  -2   11.94    0.35
   8  -6   2   12.55    0.36
  -7   6  -3   14.82    0.40
   7  -6   3   14.45    0.41
  -6   6  -4    6.86    0.21
   6  -6   4    7.20    0.22
  -5   6  -5    2.65    0.11
   5  -6   5    2.57    0.12
  -4   6  -6   13.51    0.37
  -4   6  -6   14.17    0.38
  -4   6  -6   14.34    0.38
   4  -6   6   14.78    0.39
  -3   6  -7    9.72    0.26
  -3   6  -7    9.55    0.27
  -3   6  -7    9.22    0.26
   3  -6   7    9.44    0.27
  -2   6  -8    8.31    0.24
  -2   6  -8    8.50    0.24
   2  -6   8    8.45    0.25
  -1   6  -9   37.17    0.90
  -1   6  -9   34.41    0.90
   1  -6   9   37.38    0.91
   0   6 -10    0.34    0.06
   0   6 -10    0.35    0.06
   0  -6  10    0.44    0.08
   0  -6  10    0.41    0.06
   1   6 -11    4.21    0.14
   1   6 -11    4.66    0.14
  -1  -6  11    4.52    0.16
  -1  -6  11    4.51    0.13
   2   6 -12    1.63    0.08
   2   6 -12    1.74    0.07
  -2  -6  12    1.73    0.06
   3   6 -13    1.53    0.07
   3   6 -13    1.47    0.08
  -3  -6  13    1.51    0.10
  -3  -6  13    1.41    0.06
   4   6 -14    0.37    0.06
   4   6 -14    0.44    0.05
  -4  -6  14    0.29    0.06
  -5  -6  15    2.16    0.13
   6   6 -16    5.93    0.20
  -6  -6  16    5.96    0.22
   7   6 -17    3.66    0.15
  -7  -6  17    3.37    0.17
   8   6 -18    9.54    0.29
   9   6 -19    0.17    0.06
  -9  -6  19    0.23    0.08
  10   6 -20    1.66    0.13
 -10  -6  20    1.57    0.15
 -12   7   1   -0.01    0.07
  12  -7  -1   -0.14    0.08
 -11   7   0    0.01    0.06
  11  -7   0   -0.03    0.08
 -10   7  -1    0.36    0.07
  10  -7   1    0.31    0.09
  -9   7  -2    3.54    0.16
   9  -7   2    3.22    0.17
  -8   7  -3    0.00    0.06
   8  -7   3    0.01    0.07
  -7   7  -4   -0.04    0.06
   7  -7   4    0.04    0.07
  -6   7  -5    7.03    0.22
   6  -7   5    7.05    0.23
  -5   7  -6   11.07    0.31
   5  -7   6   11.10    0.32
  -4   7  -7   22.51    0.57
  -4   7  -7   22.34    0.56
  -4   7  -7   19.99    0.56
   4  -7   7   22.81    0.57
  -3   7  -8    5.84    0.17
  -3   7  -8    5.85    0.19
  -3   7  -8    5.44    0.17
   3  -7   8    5.84    0.19
  -2   7  -9    1.34    0.08
  -2   7  -9    1.40    0.07
   2  -7   9    1.31    0.11
  -1   7 -10    3.35    0.12
  -1   7 -10    3.36    0.11
   1  -7  10    3.25    0.12
   1  -7  10    3.33    0.13
   0   7 -11    3.28    0.11
   0   7 -11    3.11    0.11
   0  -7  11    3.38    0.12
   0  -7  11    3.30    0.14
   1   7 -12    0.88    0.06
   1   7 -12    0.82    0.05
  -1  -7  12    0.77    0.06
   2   7 -13    2.11    0.08
   2   7 -13    1.95    0.09
  -2  -7  13    2.01    0.08
  -2  -7  13    2.12    0.11
   3   7 -14    3.22    0.11
   3   7 -14    3.51    0.12
  -3  -7  14    3.52    0.14
  -3  -7  14    3.32    0.10
   4   7 -15    1.97    0.09
  -4  -7  15    2.13    0.12
   5   7 -16    2.08    0.09
  -5  -7  16    1.67    0.13
  -6  -7  17    1.11    0.11
  -7  -7  18    0.29    0.07
   8   7 -19   13.12    0.38
  -8  -7  19   12.93    0.40
   9   7 -20    1.15    0.11
  -9  -7  20    1.65    0.15
 -12   8   0    0.22    0.08
  12  -8   0    0.19    0.09
 -11   8  -1    1.38    0.12
  11  -8   1    1.28    0.14
 -10   8  -2    2.94    0.14
  10  -8   2    3.07    0.17
  -9   8  -3    0.24    0.06
   9  -8   3    0.27    0.09
  -8   8  -4    0.42    0.09
   8  -8   4    0.32    0.08
  -7   8  -5    9.71    0.28
   7  -8   5    9.58    0.30
  -6   8  -6   25.77    0.65
   6  -8   6   24.36    0.66
  -5   8  -7    4.55    0.17
  -5   8  -7    4.47    0.15
   5  -8   7    4.19    0.17
  -4   8  -8    1.68    0.08
  -4   8  -8    1.86    0.09
  -4   8  -8    1.85    0.12
   4  -8   8    1.87    0.11
  -3   8  -9    4.90    0.15
  -3   8  -9    4.78    0.17
  -3   8  -9    4.42    0.15
   3  -8   9    4.91    0.17
  -2   8 -10    0.11    0.04
  -2   8 -10    0.06    0.03
   2  -8  10    0.22    0.06
   2  -8  10    0.12    0.04
  -1   8 -11    2.57    0.10
  -1   8 -11    2.79    0.10
   1  -8  11    2.84    0.13
   0   8 -12    0.27    0.04
   0   8 -12    0.40    0.05
   0  -8  12    0.29    0.07
   0  -8  12    0.26    0.06
   1   8 -13    1.07    0.06
   1   8 -13    1.01    0.06
  -1  -8  13    1.06    0.08
  -1  -8  13    0.96    0.10
   2   8 -14    3.89    0.13
   2   8 -14    3.71    0.14
  -2  -8  14    3.66    0.12
  -2  -8  14    3.72    0.15
   3   8 -15   19.90    0.50
  -3  -8  15   18.16    0.48
  -3  -8  15   19.75    0.52
   4   8 -16    0.45    0.06
  -4  -8  16    0.40    0.07
   5   8 -17    0.00    0.04
  -5  -8  17    0.08    0.07
   6   8 -18    0.34    0.06
  -6  -8  18    0.27    0.07
  -7  -8  19   -0.08    0.07
   8   8 -20    2.02    0.10
  -8  -8  20    2.08    0.16
 -11   9  -2    0.08    0.07
  11  -9   2   -0.02    0.08
 -10   9  -3    0.88    0.09
  10  -9   3    0.76    0.13
  -9   9  -4    0.77    0.10
   9  -9   4    0.73    0.12
  -8   9  -5    1.79    0.11
   8  -9   5    1.87    0.14
  -7   9  -6    2.09    0.11
   7  -9   6    2.19    0.14
  -6   9  -7    2.12    0.11
   6  -9   7    2.04    0.14
  -5   9  -8   31.27    0.79
  -5   9  -8   30.76    0.80
   5  -9   8   30.93    0.80
  -4   9  -9    0.94    0.11
  -4   9  -9    0.96    0.08
  -4   9  -9    1.02    0.08
   4  -9   9    0.91    0.10
  -3   9 -10   38.69    0.94
  -3   9 -10   37.93    0.96
  -3   9 -10   36.06    0.94
   3  -9  10   37.35    0.95
  -2   9 -11    2.50    0.10
  -2   9 -11    2.96    0.10
   2  -9  11    2.91    0.13
   2  -9  11    2.87    0.13
  -1   9 -12    7.97    0.22
  -1   9 -12    7.48    0.23
   1  -9  12    7.93    0.23
   1  -9  12    7.70    0.24
   0   9 -13    0.21    0.03
   0  -9  13    0.13    0.06
   0  -9  13    0.21    0.05
   1   9 -14    6.43    0.18
  -1  -9  14    6.24    0.21
   2   9 -15    0.67    0.05
  -2  -9  15    0.62    0.06
  -2  -9  15    0.46    0.08
   3   9 -16    4.51    0.14
  -3  -9  16    4.63    0.17
   4   9 -17    3.92    0.13
  -4  -9  17    4.00    0.17
   5   9 -18    4.09    0.14
  -5  -9  18    3.93    0.17
   6   9 -19    0.51    0.07
  -6  -9  19    0.61    0.12
   7   9 -20    2.44    0.11
  -7  -9  20    2.43    0.16
 -11  10  -3    0.22    0.08
  11 -10   3    0.33    0.10
 -10  10  -4    0.13    0.06
  10 -10   4    0.11    0.08
  -9  10  -5    0.01    0.05
   9 -10   5    0.10    0.08
  -8  10  -6    2.62    0.13
   8 -10   6    2.92    0.17
  -7  10  -7    3.42    0.14
   7 -10   7    3.65    0.17
  -6  10  -8    4.84    0.16
   6 -10   8    4.62    0.19
  -5  10  -9    8.13    0.24
   5 -10   9    8.24    0.26
  -4  10 -10    6.06    0.22
  -4  10 -10    6.22    0.19
   4 -10  10    5.93    0.21
  -3  10 -11    0.99    0.07
  -3  10 -11    0.97    0.12
   3 -10  11    0.84    0.10
   3 -10  11    0.97    0.12
  -2  10 -12   19.77    0.50
  -2  10 -12   19.35    0.53
   2 -10  12   19.82    0.52
   2 -10  12   18.93    0.52
  -1  10 -13    5.58    0.17
   1 -10  13    5.53    0.19
   1 -10  13    5.69    0.20
   0  10 -14   33.03    0.83
   0 -10  14   33.29    0.85
   0 -10  14   33.14    0.84
   1  10 -15    5.76    0.17
  -1 -10  15    5.71    0.18
  -1 -10  15    5.81    0.20
   2  10 -16   10.62    0.29
  -2 -10  16   10.86    0.32
   3  10 -17    0.60    0.06
  -3 -10  17    0.65    0.09
   4  10 -18    3.54    0.12
  -4 -10  18    3.62    0.16
   5  10 -19    0.23    0.04
 -10  11  -5    6.75    0.24
  10 -11   5    6.98    0.27
  -9  11  -6    0.40    0.09
   9 -11   6    0.34    0.09
  -8  11  -7    6.80    0.22
   8 -11   7    6.70    0.28
  -7  11  -8    6.38    0.20
   7 -11   8    6.30    0.24
  -6  11  -9    0.00    0.04
   6 -11   9   -0.03    0.07
  -5  11 -10    5.73    0.22
  -5  11 -10    6.03    0.19
   5 -11  10    5.80    0.21
  -4  11 -11    8.38    0.28
  -4  11 -11    8.24    0.24
   4 -11  11    8.10    0.26
   4 -11  11    8.33    0.27
  -3  11 -12    0.69    0.06
  -3  11 -12    0.78    0.12
   3 -11  12    1.01    0.11
   3 -11  12    0.85    0.11
  -2  11 -13   25.13    0.66
  -2  11 -13   25.11    0.63
   2 -11  13   24.47    0.65
   2 -11  13   24.06    0.65
  -1  11 -14    1.92    0.08
   1 -11  14    2.13    0.11
   1 -11  14    2.01    0.12
   0  11 -15    1.52    0.07
   0 -11  15    1.48    0.11
   0 -11  15    1.83    0.09
   1  11 -16    0.45    0.05
  -1 -11  16    0.64    0.10
  -2 -11  17    0.12    0.08
  -9  12  -7    7.76    0.25
   9 -12   7    7.60    0.28
  -8  12  -8    0.23    0.06
   8 -12   8    0.04    0.09
  -7  12  -9    2.08    0.11
   6 -12  10    2.09    0.13
  -5  12 -11    0.19    0.08
  -5  12 -11    0.01    0.04
   5 -12  11    0.10    0.06
  -4  12 -12    1.05    0.07
  -4  12 -12    1.17    0.12
   4 -12  12    1.01    0.11
   4 -12  12    1.18    0.12
  -3  12 -13    0.78    0.06
  -3  12 -13    0.78    0.12
   3 -12  13    0.66    0.11
   3 -12  13    0.69    0.11
  -2  12 -14    0.51    0.06
  -2  12 -14    0.33    0.09
   2 -12  14    0.64    0.10
   2 -12  14    0.48    0.11
   1 -12  15    0.24    0.06
  -8  13  -9    1.44    0.11
  -7  13 -10    0.78    0.11
   7 -13  10    0.95    0.14
   6 -13  11    0.99    0.13
  -5  13 -12   -0.08    0.08
   5 -13  12    0.17    0.09
  -4  13 -13    0.49    0.09
   4 -13  13    0.34    0.08
  -3  13 -14    4.49    0.20
  -2  13 -15    2.57    0.16
   2 -13  15    2.57    0.13
  -1  13 -16    1.52    0.14
  -5  14 -13    1.48    0.13
   5 -14  13    1.76    0.15
  -4  14 -14    1.74    0.15
   4 -14  14    1.64    0.13
  -3  14 -15    4.82    0.22
   3 -14  15    4.63    0.19
  -2  14 -16    0.21    0.09
  -1  14 -17    2.84    0.17
  -1 -16  11    0.26    0.08
   1  16 -11    0.31    0.10
   0  16 -10    0.55    0.10
   1 -16   9    0.88    0.13
  -1  16  -9    0.99    0.13
   2 -16   8    0.28    0.09
   3 -16   7    0.89    0.13
   4 -16   6    0.61    0.10
   3  15 -12    3.51    0.16
  -2 -15  11    2.73    0.17
   2  15 -11    3.17    0.16
  -1 -15  10    4.47    0.18
   1  15 -10    4.76    0.20
   0 -15   9    0.19    0.08
   0  15  -9    0.28    0.08
   1 -15   8    2.98    0.15
  -1  15  -8    3.21    0.16
   2 -15   7    0.07    0.07
   3 -15   6    0.36    0.08
   4 -15   5    0.08    0.08
   5 -15   4    0.88    0.14
   6 -15   3   -0.02    0.09
  -3 -14  11    0.05    0.06
   3  14 -11    0.17    0.08
  -2 -14  10    0.56    0.10
   2  14 -10    0.38    0.07
  -1 -14   9    1.84    0.12
   1  14  -9    1.54    0.12
   0 -14   8    0.24    0.07
   0  14  -8    0.53    0.11
  -1  14  -7    0.22    0.08
   2 -14   6   -0.06    0.07
   3 -14   5    1.32    0.13
   4 -14   4    5.77    0.23
   5 -14   3    0.32    0.09
   6 -14   2    2.86    0.17
   7 -14   1    2.45    0.17
   8 -14   0    0.18    0.10
  -4 -13  11    0.44    0.08
  -3 -13  10    1.80    0.11
  -2 -13   9    1.03    0.10
   2  13  -9    1.11    0.13
  -1 -13   8    0.14    0.06
   0 -13   7    1.05    0.10
   0  13  -7    0.87    0.13
   1 -13   6    2.89    0.16
  -1  13  -6    3.07    0.15
   2 -13   5    0.08    0.07
   4 -13   3    8.77    0.30
   5 -13   2    1.85    0.14
   6 -13   1    0.80    0.13
   7 -13   0    1.65    0.15
   8 -13  -1    0.02    0.09
   9 -13  -2    0.36    0.10
  -5 -12  11    0.43    0.08
  -4 -12  10    0.26    0.06
  -3 -12   9    0.31    0.06
  -2 -12   8    0.07    0.05
   2  12  -8    0.06    0.07
  -1 -12   7    0.26    0.07
   1  12  -7    0.38    0.07
   0 -12   6    0.68    0.10
   0  12  -6    0.69    0.10
   1 -12   5    0.20    0.08
  -1  12  -5    0.38    0.08
   2 -12   4    9.15    0.29
   2 -12   4    9.57    0.27
   3 -12   3    0.75    0.09
   3 -12   3    0.74    0.12
   4 -12   2   29.34    0.79
   4 -12   2   30.44    0.77
   5 -12   1    0.25    0.06
   5 -12   1    0.56    0.12
  -5  12  -1    0.23    0.03
   6 -12   0    2.23    0.12
   6 -12   0    2.00    0.16
  -6  12   0    2.19    0.08
   7 -12  -1    0.78    0.13
   7 -12  -1    0.59    0.10
  -7  12   1    0.59    0.06
   8 -12  -2    1.61    0.12
   8 -12  -2    1.52    0.14
   9 -12  -3    0.20    0.09
   9 -12  -3   -0.09    0.08
  -9  12   3    0.19    0.05
  10 -12  -4    1.00    0.15
  -5 -11  10    5.64    0.18
  -4 -11   9   17.52    0.46
  -3 -11   8   18.49    0.49
  -2 -11   7    0.11    0.06
  -2 -11   7    0.17    0.04
   2  11  -7    0.26    0.07
  -1 -11   6   17.38    0.46
  -1 -11   6   18.06    0.48
   1  11  -6   18.08    0.48
   0 -11   5    3.36    0.12
   0 -11   5    3.42    0.14
   0  11  -5    3.33    0.14
   1 -11   4    3.69    0.12
   1 -11   4    3.73    0.16
  -1  11  -4    3.75    0.15
   2 -11   3    0.63    0.07
   2 -11   3    0.63    0.11
   3 -11   2    8.52    0.27
   3 -11   2    8.39    0.24
   4 -11   1    0.56    0.11
   4 -11   1    0.24    0.08
  -4  11  -1    0.41    0.05
   5 -11   0   12.60    0.35
   5 -11   0   12.41    0.38
  -5  11   0   12.63    0.33
   6 -11  -1    0.42    0.09
   6 -11  -1    0.11    0.10
  -6  11   1    0.17    0.04
   7 -11  -2    2.78    0.15
   7 -11  -2    2.64    0.14
  -7  11   2    2.68    0.11
   8 -11  -3    1.07    0.11
   8 -11  -3    1.34    0.15
   9 -11  -4    0.85    0.14
  -9  11   4    0.84    0.09
  10 -11  -5    0.53    0.10
 -10  11   5    0.43    0.07
  -5 -10   9    0.06    0.05
  -5 -10   9    0.08    0.05
  -4 -10   8    2.20    0.10
  -4 -10   8    2.26    0.10
  -3 -10   7   14.40    0.38
  -3 -10   7   14.22    0.37
  -2 -10   6   10.57    0.30
  -2 -10   6   10.50    0.28
  -1 -10   5   -0.03    0.05
  -1 -10   5    0.07    0.03
   1  10  -5    0.10    0.05
   0 -10   4    3.17    0.13
   0 -10   4    3.45    0.11
   0  10  -4    3.15    0.14
   1 -10   3   12.71    0.36
   1 -10   3   13.08    0.34
  -1  10  -3   13.01    0.36
   2 -10   2    1.55    0.08
   2 -10   2    1.59    0.11
   3 -10   1    0.76    0.10
   3 -10   1    0.65    0.07
  -3  10  -1    0.69    0.04
  -3  10  -1    0.67    0.04
   4 -10   0    9.41    0.29
   4 -10   0    8.91    0.29
  -4  10   0    9.77    0.25
  -4  10   0    9.30    0.25
   5 -10  -1    0.06    0.07
   5 -10  -1    0.05    0.05
  -5  10   1    0.10    0.04
   6 -10  -2    0.80    0.11
   6 -10  -2    0.77    0.10
  -6  10   2    0.96    0.08
   7 -10  -3    8.49    0.27
  -7  10   3    8.06    0.25
   8 -10  -4    0.54    0.09
  -8  10   4    0.51    0.09
  -9  10   5    0.17    0.06
  10 -10  -6    2.14    0.16
 -10  10   6    2.28    0.13
  11 -10  -7    0.32    0.10
 -11  10   7    0.29    0.08
  -7  -9  10    0.53    0.08
  -5  -9   8   24.53    0.63
  -5  -9   8   25.19    0.63
  -4  -9   7    5.14    0.17
  -4  -9   7    5.19    0.16
  -3  -9   6    9.72    0.27
  -3  -9   6    9.54    0.26
  -2  -9   5   15.88    0.42
  -2  -9   5   15.99    0.40
  -1  -9   4    0.38    0.03
  -1  -9   4    0.36    0.05
  -1  -9   4    0.48    0.07
   1   9  -4    0.36    0.07
   0  -9   3    9.50    0.25
   0  -9   3    8.83    0.24
   0  -9   3    9.55    0.27
   0   9  -3    9.48    0.27
   1  -9   2    2.77    0.12
   1  -9   2    2.76    0.10
  -1   9  -2    2.81    0.12
   2  -9   1    7.80    0.23
   2  -9   1    7.19    0.21
   3  -9   0    1.38    0.10
   3  -9   0    1.19    0.08
  -3   9   0    1.27    0.06
   4  -9  -1    1.24    0.09
   4  -9  -1    1.36    0.10
  -4   9   1    1.21    0.07
  -4   9   1    1.34    0.06
   5  -9  -2    3.01    0.14
   5  -9  -2    3.00    0.13
  -5   9   2    2.85    0.11
  -5   9   2    3.09    0.11
   6  -9  -3    3.31    0.15
  -6   9   3    3.53    0.13
   7  -9  -4    0.44    0.07
  -7   9   4    0.46    0.08
   8  -9  -5    7.13    0.25
  -8   9   5    7.11    0.23
  -9   9   6    0.12    0.06
  10  -9  -7    1.24    0.14
 -10   9   7    1.16    0.11
  11  -9  -8    4.57    0.21
 -11   9   8    4.61    0.19
  -9  -8  11    0.37    0.07
   9   8 -11    0.39    0.06
  -8  -8  10    0.85    0.09
   8   8 -10    0.87    0.06
  -7  -8   9    2.54    0.11
  -6  -8   8    3.23    0.14
  -5  -8   7    3.80    0.13
  -5  -8   7    3.83    0.13
  -4  -8   6   18.77    0.49
  -4  -8   6   19.09    0.48
  -3  -8   5    0.78    0.05
  -3  -8   5    0.81    0.08
  -2  -8   4    3.44    0.13
  -2  -8   4    3.41    0.10
  -1  -8   3   14.13    0.36
  -1  -8   3   11.86    0.34
  -1  -8   3   13.59    0.34
   1   8  -3   14.13    0.36
   0  -8   2    0.42    0.05
   0  -8   2    0.50    0.04
   0  -8   2    0.51    0.08
   0   8  -2    0.53    0.08
   1  -8   1    0.26    0.05
   1  -8   1    0.19    0.03
   1  -8   1    0.41    0.08
   2  -8   0    1.39    0.07
   2  -8   0    1.31    0.10
   3  -8  -1    0.39    0.06
   3  -8  -1    0.44    0.09
  -3   8   1    0.44    0.05
  -3   8   1    0.45    0.06
   4  -8  -2   12.38    0.33
   4  -8  -2   12.51    0.35
  -4   8   2   12.35    0.32
  -4   8   2   11.62    0.32
   5  -8  -3    0.57    0.09
  -5   8   3    0.44    0.06
  -5   8   3    0.47    0.06
   6  -8  -4    1.57    0.11
  -6   8   4    1.63    0.09
   7  -8  -5   12.37    0.37
  -7   8   5   13.12    0.36
   8  -8  -6    4.98    0.20
  -8   8   6    4.91    0.18
   9  -8  -7   11.99    0.40
  -9   8   7   12.49    0.36
  10  -8  -8    0.61    0.13
 -10   8   8    0.44    0.07
  11  -8  -9    0.74    0.13
 -11   8   9    0.57    0.12
 -11  -7  12    0.05    0.07
  11   7 -12    0.12    0.05
 -10  -7  11    0.11    0.07
  10   7 -11    0.10    0.04
  -9  -7  10    0.19    0.06
   9   7 -10    0.08    0.04
  -8  -7   9    0.73    0.09
   8   7  -9    0.61    0.07
  -7  -7   8    0.94    0.09
   7   7  -8    0.93    0.06
  -6  -7   7    0.19    0.05
   6   7  -7    0.21    0.04
   6   7  -7    0.17    0.03
  -5  -7   6    6.77    0.20
   5   7  -6    6.73    0.18
   5   7  -6    6.98    0.18
  -4  -7   5    6.58    0.20
  -4  -7   5    6.72    0.19
  -3  -7   4    2.39    0.17
  -3  -7   4    2.41    0.09
  -3  -7   4    2.53    0.09
  -2  -7   3   48.88    1.17
  -2  -7   3   47.25    1.20
  -1  -7   2    4.09    0.17
  -1  -7   2    4.27    0.11
   1   7  -2    3.98    0.16
   0  -7   1    1.03    0.05
   0   7  -1    0.98    0.10
   1  -7   0    0.60    0.10
   1  -7   0    0.53    0.05
   1  -7   0    0.57    0.06
   2  -7  -1    3.16    0.11
   2  -7  -1    3.08    0.13
   2  -7  -1    2.90    0.10
  -2   7   1    3.01    0.09
  -2   7   1    3.04    0.09
   3  -7  -2    1.44    0.10
   3  -7  -2    1.38    0.08
  -3   7   2    1.41    0.07
  -3   7   2    1.42    0.07
   4  -7  -3    2.25    0.10
  -4   7   3    2.10    0.09
  -4   7   3    2.20    0.09
   5  -7  -4    0.49    0.09
  -5   7   4    0.46    0.07
  -5   7   4    0.53    0.07
   6  -7  -5    1.84    0.11
  -6   7   5    1.83    0.10
   7  -7  -6    5.30    0.19
  -7   7   6    5.41    0.19
   8  -7  -7    1.76    0.13
  -8   7   7    1.74    0.12
   9  -7  -8    3.38    0.17
  -9   7   8    3.31    0.15
  10  -7  -9    2.75    0.17
 -10   7   9    2.97    0.15
  11  -7 -10    0.21    0.09
 -11   7  10    0.12    0.08
  12  -7 -11   -0.01    0.09
 -12   7  11   -0.07    0.07
 -12  -6  12    0.36    0.08
  12   6 -12    0.46    0.10
 -11  -6  11   -0.04    0.09
  11   6 -11    0.12    0.06
 -10  -6  10    4.77    0.19
  10   6 -10    4.61    0.17
  -9  -6   9    4.15    0.17
   9   6  -9    3.94    0.15
  -8  -6   8    3.45    0.15
   8   6  -8    3.73    0.13
  -7  -6   7   21.10    0.55
   7   6  -7   20.13    0.53
   7   6  -7   20.99    0.53
  -6  -6   6    0.76    0.08
   6   6  -6    0.80    0.06
   6   6  -6    0.77    0.05
  -5  -6   5    5.14    0.16
   5   6  -5    5.25    0.15
   5   6  -5    5.33    0.15
  -4  -6   4    7.33    0.21
  -4  -6   4    7.37    0.21
   4   6  -4    7.67    0.19
   4   6  -4    7.60    0.19
  -3  -6   3    3.16    0.10
  -3  -6   3    3.29    0.10
  -3  -6   3    3.23    0.12
  -2  -6   2   22.37    0.55
  -2  -6   2   22.53    0.57
  -1  -6   1    1.09    0.09
   1   6  -1    1.10    0.07
   0  -6   0   14.53    0.35
   0  -6   0   14.47    0.38
   0   6   0   14.20    0.37
   1  -6  -1    1.09    0.08
   1  -6  -1    1.15    0.10
   1  -6  -1    1.12    0.06
   1  -6  -1    0.99    0.06
   2  -6  -2   21.97    0.56
   2  -6  -2   22.25    0.56
  -2   6   2   23.10    0.56
  -2   6   2   22.70    0.56
   3  -6  -3    3.27    0.12
   3  -6  -3    3.50    0.14
  -3   6   3    3.24    0.12
  -3   6   3    3.37    0.11
   4  -6  -4    7.67    0.23
  -4   6   4    7.39    0.21
  -4   6   4    7.60    0.22
   5  -6  -5    5.23    0.18
  -5   6   5    4.75    0.16
  -5   6   5    5.16    0.16
   6  -6  -6    0.87    0.10
  -6   6   6    0.83    0.09
   7  -6  -7   21.48    0.57
  -7   6   7   21.05    0.56
   8  -6  -8    3.45    0.17
  -8   6   8    3.35    0.16
   9  -6  -9    3.91    0.18
  -9   6   9    4.09    0.17
  10  -6 -10    4.44    0.20
 -10   6  10    4.47    0.19
  11  -6 -11   -0.02    0.08
 -11   6  11    0.15    0.08
  12  -6 -12    0.28    0.09
 -12  -5  11    0.92    0.14
  12   5 -11    0.91    0.11
  11   5 -10    1.85    0.12
 -10  -5   9    8.20    0.27
  10   5  -9    8.67    0.26
  -9  -5   8    0.40    0.09
   9   5  -8    0.54    0.08
  -8  -5   7    0.39    0.09
   8   5  -7    0.21    0.06
   8   5  -7    0.16    0.05
  -7  -5   6    2.31    0.11
   7   5  -6    2.10    0.09
   7   5  -6    2.37    0.10
  -6  -5   5    0.91    0.08
   6   5  -5    0.83    0.06
   6   5  -5    0.88    0.06
  -5  -5   4    0.63    0.07
   5   5  -4    0.68    0.06
   5   5  -4    0.63    0.05
  -4  -5   3   27.05    0.68
  -4  -5   3   28.12    0.68
   4   5  -3   27.20    0.67
  -3  -5   2   16.55    0.42
  -3  -5   2   17.51    0.42
  -3  -5   2   17.10    0.43
   3   5  -2   16.22    0.43
  -2  -5   1   17.71    0.45
  -2  -5   1   18.04    0.44
   2   5  -1   17.86    0.45
  -1  -5   0    3.80    0.12
   1   5   0    3.83    0.12
   1   5   0    3.82    0.12
   0  -5  -1    1.75    0.08
   0  -5  -1    1.76    0.08
   0   5   1    1.78    0.08
   1  -5  -2    1.88    0.09
   1  -5  -2    1.90    0.08
   1  -5  -2    1.91    0.07
   1  -5  -2    1.90    0.07
  -1   5   2    1.94    0.05
  -1   5   2    1.91    0.05
   2  -5  -3    2.25    0.09
   2  -5  -3    2.35    0.09
   2  -5  -3    2.38    0.10
  -2   5   3    2.32    0.08
  -2   5   3    2.32    0.08
   3  -5  -4    0.81    0.08
  -3   5   4    0.82    0.07
  -3   5   4    0.88    0.08
   4  -5  -5   27.45    0.70
  -4   5   5   28.07    0.69
  -4   5   5   26.74    0.69
   5  -5  -6    5.63    0.19
  -5   5   6    5.28    0.17
   6  -5  -7    0.22    0.06
  -6   5   7    0.19    0.06
   7  -5  -8    5.73    0.20
  -7   5   8    5.73    0.20
   8  -5  -9    3.90    0.18
  -8   5   9    4.02    0.17
   9  -5 -10    0.72    0.12
  -9   5  10    0.64    0.12
  10  -5 -11    0.25    0.08
 -10   5  11    0.09    0.07
  11  -5 -12    0.63    0.13
 -11   5  12    0.50    0.11
  12  -5 -13    0.08    0.09
 -12   5  13    0.21    0.08
 -12  -4  10    2.58    0.16
  12   4 -10    2.50    0.14
  11   4  -9    0.24    0.06
 -10  -4   8    0.49    0.10
  10   4  -8    0.58    0.10
  -9  -4   7    0.38    0.09
   9   4  -7    0.60    0.09
  -8  -4   6    2.74    0.13
   8   4  -6    2.43    0.12
  -7  -4   5    3.28    0.13
   7   4  -5    3.01    0.11
   7   4  -5    3.27    0.12
  -6  -4   4    0.16    0.05
   6   4  -4    0.13    0.04
   6   4  -4    0.16    0.04
  -5  -4   3    8.30    0.23
   5   4  -3    8.21    0.23
   5   4  -3    8.10    0.22
  -4  -4   2    5.28    0.16
  -4  -4   2    5.57    0.16
   4   4  -2    5.66    0.15
   4   4  -2    5.04    0.16
   4   4  -2    5.47    0.15
  -3  -4   1    8.88    0.23
  -3  -4   1    9.34    0.24
  -3  -4   1    9.24    0.24
   3   4  -1    9.20    0.23
   3   4  -1    8.81    0.24
   3   4  -1    9.26    0.23
  -2  -4   0  277.69    6.15
  -2  -4   0  259.57    6.20
   2   4   0  223.76    6.17
  -1  -4  -1   60.35    1.47
   1   4   1   59.57    1.47
   1   4   1   60.99    1.47
   0  -4  -2    5.24    0.15
   0  -4  -2    5.36    0.15
   0  -4  -2    5.56    0.13
   0   4   2    5.16    0.15
   1  -4  -3   25.90    0.62
   1  -4  -3   25.10    0.63
   1  -4  -3   25.66    0.62
  -1   4   3   25.14    0.63
  -1   4   3   25.20    0.62
   2  -4  -4  395.18    9.22
   2  -4  -4  373.81    9.24
   2  -4  -4  329.52    9.19
  -2   4   4  399.91    9.21
  -2   4   4  393.18    9.21
   3  -4  -5    4.16    0.13
   3  -4  -5    4.21    0.14
  -3   4   5    4.42    0.14
  -3   4   5    4.29    0.14
   4  -4  -6   22.28    0.56
  -4   4   6   21.39    0.55
  -4   4   6   21.24    0.55
   5  -4  -7   67.85    1.67
  -5   4   7   67.78    1.67
   6  -4  -8    0.59    0.09
  -6   4   8    0.63    0.08
   7  -4  -9    0.55    0.10
  -7   4   9    0.59    0.09
   8  -4 -10    7.25    0.25
  -8   4  10    7.33    0.24
  -9   4  11    3.61    0.17
  10  -4 -12    0.13    0.08
 -10   4  12   -0.02    0.07
  11  -4 -13    0.75    0.14
 -11   4  13    0.57    0.12
  12  -4 -14    0.02    0.09
 -12   4  14   -0.01    0.08
 -13  -3  10    1.11    0.14
  13   3 -10    1.02    0.12
 -12  -3   9    5.16    0.21
  12   3  -9    5.25    0.20
  11   3  -8    0.12    0.07
 -10  -3   7    0.57    0.10
  10   3  -7    0.39    0.07
  -9  -3   6    7.60    0.24
   9   3  -6    7.63    0.24
  -8  -3   5    2.06    0.11
   8   3  -5    2.13    0.10
  -7  -3   4    0.24    0.05
   7   3  -4    0.24    0.05
   7   3  -4    0.27    0.05
  -6  -3   3    5.61    0.18
   6   3  -3    5.80    0.17
   6   3  -3    5.18    0.17
  -5  -3   2    0.52    0.08
   5   3  -2    0.64    0.07
   5   3  -2    0.58    0.08
  -4  -3   1   43.47    1.06
  -4  -3   1   42.39    1.06
   4   3  -1   42.07    1.06
   4   3  -1   43.59    1.06
   4   3  -1   44.07    1.06
  -3  -3   0   46.17    1.13
  -3  -3   0   45.82    1.13
   3   3   0   46.31    1.13
   3   3   0   46.53    1.12
   3   3   0   46.19    1.12
  -2  -3  -1   21.23    0.50
  -2  -3  -1   20.40    0.51
   2   3   1   19.71    0.51
  -1  -3  -2  212.39    4.78
  -1  -3  -2  190.20    4.79
   1   3   2  186.34    4.79
   0  -3  -3   49.49    1.17
   0  -3  -3   46.56    1.18
   0   3   3   48.46    1.17
   0   3   3   48.79    1.18
   0   3   3   47.80    1.17
   1  -3  -4    6.89    0.19
   1  -3  -4    6.87    0.18
   1  -3  -4    6.81    0.18
  -1   3   4    6.68    0.19
  -1   3   4    6.94    0.18
  -1   3   4    6.88    0.18
   2  -3  -5  558.32   12.96
   2  -3  -5  502.90   12.94
   2  -3  -5  545.31   12.97
  -2   3   5  505.71   12.94
  -2   3   5  551.80   12.95
   3  -3  -6   49.70    1.17
   3  -3  -6   47.08    1.17
  -3   3   6   48.09    1.17
  -3   3   6   45.53    1.17
   4  -3  -7   74.93    1.87
  -4   3   7   74.67    1.87
  -4   3   7   79.40    1.87
   5  -3  -8    1.83    0.11
  -5   3   8    1.93    0.11
   6  -3  -9   18.97    0.50
  -6   3   9   18.21    0.49
   7  -3 -10   10.14    0.31
  -7   3  10   10.40    0.30
   8  -3 -11   14.10    0.40
  -8   3  11   13.59    0.40
  -9   3  12   15.62    0.45
  10  -3 -13    0.14    0.07
 -10   3  13   -0.06    0.07
  11  -3 -14    0.05    0.08
 -11   3  14    0.09    0.07
  12  -3 -15    0.10    0.09
 -12   3  15   -0.02    0.08
 -13  -2   9    0.60    0.13
  13   2  -9    0.93    0.14
 -12  -2   8    0.30    0.08
  12   2  -8    0.25    0.08
  11   2  -7    1.25    0.13
 -10  -2   6    2.26    0.13
  10   2  -6    2.33    0.14
  -9  -2   5    1.85    0.12
   9   2  -5    1.80    0.11
  -8  -2   4    1.23    0.09
   8   2  -4    1.17    0.09
  -7  -2   3    0.46    0.08
   7   2  -3    0.53    0.08
  -6  -2   2    7.61    0.23
   6   2  -2    7.48    0.22
   6   2  -2    7.91    0.23
  -5  -2   1   18.20    0.47
   5   2  -1   18.12    0.46
   5   2  -1   18.03    0.47
  -4  -2   0    8.50    0.23
  -4  -2   0    8.18    0.23
   4   2   0    8.48    0.22
   4   2   0    8.45    0.22
  -3  -2  -1   21.77    0.53
  -3  -2  -1   20.83    0.53
   3   2   1   21.47    0.53
   3   2   1   21.28    0.53
   3   2   1   21.57    0.53
  -2  -2  -2   19.54    0.49
  -2  -2  -2   19.47    0.50
  -2  -2  -2   20.22    0.50
   2   2   2   20.06    0.49
   2   2   2   21.31    0.50
   2   2   2   20.09    0.49
  -1  -2  -3    0.52    0.03
  -1  -2  -3    0.54    0.04
  -1  -2  -3    0.59    0.04
   1   2   3    0.49    0.04
   1   2   3    0.53    0.04
   1   2   3    0.53    0.04
   0  -2  -4    6.11    0.16
   0  -2  -4    6.20    0.16
   0  -2  -4    5.80    0.16
   0   2   4    5.80    0.16
   0   2   4    5.87    0.16
   0   2   4    5.97    0.15
   1  -2  -5  568.59   13.47
   1  -2  -5  517.45   13.46
   1  -2  -5  558.14   13.47
  -1   2   5  589.56   13.47
  -1   2   5  510.82   13.45
  -1   2   5  585.20   13.48
   2  -2  -6   24.51    0.61
   2  -2  -6   25.58    0.62
   2  -2  -6   24.07    0.62
  -2   2   6   24.60    0.62
  -2   2   6   25.36    0.62
   3  -2  -7   81.20    2.02
   3  -2  -7   81.29    2.02
  -3   2   7   84.16    2.02
  -3   2   7   83.85    2.02
   4  -2  -8   86.79    2.28
  -4   2   8   98.91    2.27
   5  -2  -9   15.41    0.41
  -5   2   9   15.41    0.41
   6  -2 -10    4.92    0.17
  -6   2  10    4.90    0.17
   7  -2 -11    4.34    0.17
  -7   2  11    4.31    0.17
   8  -2 -12    0.43    0.08
  -8   2  12    0.50    0.11
   9  -2 -13    0.85    0.12
  -9   2  13    0.85    0.12
  10  -2 -14    4.54    0.20
 -10   2  14    4.45    0.19
  11  -2 -15    0.06    0.08
 -11   2  15    0.00    0.08
  12  -2 -16    0.15    0.08
 -12   2  16   -0.17    0.08
 -13  -1   8    0.78    0.13
  13   1  -8    0.77    0.12
 -12  -1   7    6.78    0.25
  12   1  -7    6.79    0.24
  11   1  -6   15.36    0.44
 -10  -1   5    1.20    0.12
  10   1  -5    1.26    0.12
  -9  -1   4    0.80    0.10
   9   1  -4    0.82    0.10
  -8  -1   3   -0.04    0.05
   8   1  -3    0.02    0.05
  -7  -1   2    4.10    0.15
   7   1  -2    4.31    0.15
  -6  -1   1    6.24    0.22
   6   1  -1    6.12    0.19
   6   1  -1    6.88    0.20
  -5  -1   0    0.01    0.05
   5   1   0    0.02    0.06
   5   1   0    0.04    0.04
  -4  -1  -1    0.42    0.06
  -4  -1  -1    0.43    0.06
   4   1   1    0.55    0.05
   4   1   1    0.48    0.06
  -3  -1  -2    4.57    0.14
  -3  -1  -2    4.66    0.14
   3   1   2    4.76    0.14
   3   1   2    4.75    0.12
   3   1   2    4.85    0.13
  -2  -1  -3   57.97    1.40
  -2  -1  -3   55.61    1.40
   2   1   3   58.69    1.40
   2   1   3   58.02    1.40
  -1  -1  -4  223.86    5.37
  -1  -1  -4  236.70    5.38
  -1  -1  -4  212.59    5.37
   1   1   4  228.61    5.38
   1   1   4  207.34    5.36
   1   1   4  213.56    5.37
   0  -1  -5   46.61    1.13
   0  -1  -5   46.10    1.13
   0   1   5   45.78    1.13
   0   1   5   45.96    1.13
   0   1   5   47.22    1.13
   1  -1  -6   49.87    1.23
   1  -1  -6   50.31    1.23
   1  -1  -6   50.38    1.22
  -1   1   6   51.29    1.23
  -1   1   6   50.15    1.23
  -1   1   6   50.59    1.23
   2  -1  -7    2.57    0.10
   2  -1  -7    2.79    0.10
   2  -1  -7    2.52    0.08
  -2   1   7    2.73    0.10
  -2   1   7    2.55    0.10
   3  -1  -8   19.78    0.50
   3  -1  -8   18.72    0.50
  -3   1   8   20.03    0.50
  -3   1   8   19.93    0.50
   4  -1  -9    0.79    0.10
  -4   1   9    0.92    0.10
   5  -1 -10    0.68    0.09
  -5   1  10    0.71    0.08
   6  -1 -11    9.66    0.29
  -6   1  11   10.07    0.29
   7  -1 -12    7.07    0.23
  -7   1  12    7.39    0.23
   8  -1 -13    1.45    0.13
  -8   1  13    1.28    0.12
   9  -1 -14    0.04    0.07
  -9   1  14    0.01    0.08
  10  -1 -15    1.46    0.14
 -10   1  15    1.88    0.13
  11  -1 -16    0.16    0.09
 -11   1  16    0.21    0.08
 -12   1  17    0.03    0.09
 -13   0   7    0.10    0.08
  13   0  -7    0.08    0.08
 -12   0   6    5.72    0.22
  12   0  -6    5.89    0.23
 -11   0   5   -0.08    0.07
  11   0  -5    0.08    0.07
 -10   0   4    2.22    0.14
  10   0  -4    2.32    0.14
  -9   0   3   -0.02    0.06
   9   0  -3    0.13    0.06
  -8   0   2    0.43    0.08
   8   0  -2    0.23    0.06
  -7   0   1    0.05    0.05
   7   0  -1    0.01    0.05
  -6   0   0    0.46    0.09
   6   0   0    0.43    0.09
  -5   0  -1    5.72    0.18
   5   0   1    5.57    0.17
  -4   0  -2  260.92    6.35
   4   0   2  271.63    6.36
   4   0   2  245.68    6.30
  -3   0  -3    0.21    0.04
  -3   0  -3    0.27    0.05
   3   0   3    0.26    0.04
   3   0   3    0.29    0.06
  -2   0  -4    2.36    0.09
  -2   0  -4    2.41    0.09
   2   0   4    2.61    0.09
   2   0   4    2.48    0.09
  -1   0  -5    0.92    0.05
  -1   0  -5    0.92    0.06
   1   0   5    0.95    0.06
   1   0   5    0.94    0.07
   0   0  -6   11.62    0.30
   0   0  -6   11.61    0.30
   0   0   6   11.97    0.30
   0   0   6   11.44    0.29
   0   0   6   11.37    0.30
   1   0  -7    0.00    0.01
   1   0  -7    0.03    0.04
   1   0  -7    0.03    0.04
  -1   0   7    0.00    0.03
  -1   0   7    0.01    0.02
  -1   0   7    0.01    0.04
   2   0  -8    2.25    0.06
   2   0  -8    2.18    0.09
   2   0  -8    2.04    0.09
  -2   0   8    2.16    0.09
  -2   0   8    2.05    0.09
   3   0  -9    0.29    0.07
   3   0  -9    0.26    0.06
  -3   0   9    0.17    0.06
  -3   0   9    0.22    0.05
   4   0 -10    0.43    0.09
  -4   0  10    0.28    0.07
   5   0 -11    0.31    0.06
  -5   0  11    0.38    0.08
   6   0 -12    3.69    0.15
  -6   0  12    3.98    0.15
   7   0 -13    0.10    0.06
  -7   0  13    0.14    0.07
   8   0 -14   31.73    0.84
  -8   0  14   32.87    0.84
   9   0 -15    0.35    0.08
  -9   0  15    0.34    0.08
  10   0 -16    0.62    0.13
 -10   0  16    0.78    0.12
  11   0 -17    0.05    0.07
 -11   0  17    0.01    0.08
 -13   1   6    2.36    0.15
  13  -1  -6    2.24    0.16
 -12   1   5    4.75    0.20
  12  -1  -5    4.46    0.21
 -11   1   4    7.46    0.26
  11  -1  -4    7.12    0.26
 -10   1   3    4.00    0.17
  10  -1  -3    3.67    0.17
  -9   1   2    3.13    0.14
   9  -1  -2    3.07    0.15
  -8   1   1    1.31    0.10
   8  -1  -1    1.35    0.10
  -7   1   0    6.91    0.22
   7  -1   0    6.96    0.22
  -6   1  -1    3.91    0.15
   6  -1   1    3.82    0.15
   5  -1   2    4.91    0.14
   5  -1   2    4.75    0.16
   5  -1   2    4.71    0.17
  -4   1  -3    3.96    0.13
  -4   1  -3    3.98    0.13
   4  -1   3    3.98    0.13
   4  -1   3    3.92    0.12
   4  -1   3    3.79    0.13
  -3   1  -4    0.38    0.06
  -3   1  -4    0.35    0.06
  -3   1  -4    0.36    0.05
   3  -1   4    0.34    0.05
   3  -1   4    0.30    0.06
  -2   1  -5    0.42    0.06
  -2   1  -5    0.35    0.06
   2  -1   5    0.32    0.06
   2  -1   5    0.49    0.06
  -1   1  -6   75.91    1.87
  -1   1  -6   77.36    1.86
   1  -1   6   76.68    1.86
   1  -1   6   76.61    1.87
   0   1  -7   22.75    0.57
   0   1  -7   22.80    0.57
   0  -1   7   23.19    0.57
   0  -1   7   21.92    0.56
   1   1  -8    3.95    0.13
   1   1  -8    3.84    0.12
  -1  -1   8    4.00    0.13
  -1  -1   8    3.70    0.12
   2   1  -9    2.94    0.11
   2   1  -9    3.17    0.11
  -2  -1   9    2.78    0.10
  -2  -1   9    3.14    0.12
   3   1 -10   67.04    1.71
   3   1 -10   72.56    1.71
   4   1 -11    2.99    0.13
  -4  -1  11    3.03    0.13
   5   1 -12    9.20    0.27
  -5  -1  12    9.50    0.27
   6   1 -13    3.53    0.14
  -6  -1  13    3.55    0.15
   7   1 -14    0.76    0.10
  -7  -1  14    0.59    0.11
   8   1 -15    0.79    0.11
  -8  -1  15    0.73    0.12
   9   1 -16    2.61    0.15
  -9  -1  16    2.49    0.16
  10   1 -17    1.55    0.14
 -10  -1  17    1.58    0.14
  11   1 -18    2.51    0.16
 -11  -1  18    2.30    0.16
 -13   2   5    0.56    0.12
  13  -2  -5    0.53    0.10
 -12   2   4   17.99    0.50
  12  -2  -4   16.74    0.50
 -11   2   3    0.61    0.11
  11  -2  -3    0.97    0.13
 -10   2   2    2.49    0.14
  10  -2  -2    2.53    0.14
  -9   2   1    3.01    0.14
   9  -2  -1    3.08    0.15
  -8   2   0    0.18    0.06
   8  -2   0    0.23    0.06
  -7   2  -1    1.01    0.09
   7  -2   1    1.02    0.09
  -6   2  -2   13.76    0.37
   6  -2   2   13.32    0.35
   6  -2   2   13.73    0.37
  -5   2  -3    1.92    0.11
   5  -2   3    1.87    0.09
   5  -2   3    1.89    0.11
  -4   2  -4   21.91    0.55
  -4   2  -4   22.25    0.55
  -4   2  -4   21.11    0.55
   4  -2   4   22.06    0.56
   4  -2   4   21.64    0.55
  -3   2  -5    4.19    0.14
  -3   2  -5    4.33    0.14
  -3   2  -5    4.26    0.13
   3  -2   5    4.10    0.13
   3  -2   5    4.38    0.14
  -2   2  -6   14.49    0.37
  -2   2  -6   14.70    0.37
   2  -2   6   14.08    0.37
   2  -2   6   14.75    0.37
  -1   2  -7    9.91    0.26
  -1   2  -7    9.92    0.26
   1  -2   7    9.84    0.26
   1  -2   7   10.09    0.27
   0   2  -8    7.43    0.21
   0   2  -8    7.50    0.21
   0  -2   8    7.56    0.21
   0  -2   8    7.60    0.21
   1   2  -9   37.61    0.91
   1   2  -9   35.57    0.91
  -1  -2   9   38.19    0.91
  -1  -2   9   35.82    0.91
   2   2 -10    0.47    0.07
  -2  -2  10    0.50    0.09
   3   2 -11    0.50    0.08
   3   2 -11    0.38    0.09
  -3  -2  11    0.33    0.07
   4   2 -12   20.25    0.53
   4   2 -12   19.85    0.50
  -4  -2  12   21.05    0.53
   5   2 -13    2.69    0.12
  -5  -2  13    2.68    0.13
   6   2 -14   38.13    0.98
  -6  -2  14   39.48    0.99
   7   2 -15    1.02    0.11
  -7  -2  15    1.14    0.12
   8   2 -16    0.49    0.10
  -8  -2  16    0.52    0.12
   9   2 -17   10.62    0.34
  -9  -2  17   11.07    0.35
  10   2 -18    2.90    0.16
 -10  -2  18    2.74    0.16
  11   2 -19    2.48    0.18
 -11  -2  19    2.74    0.17
 -13   3   4    0.65    0.12
  13  -3  -4    0.79    0.13
 -12   3   3    1.86    0.14
  12  -3  -3    2.04    0.16
 -11   3   2    5.80    0.22
  11  -3  -2    5.87    0.23
 -10   3   1    0.37    0.07
  10  -3  -1    0.44    0.09
  -9   3   0    1.95    0.12
   9  -3   0    1.84    0.13
  -8   3  -1   30.99    0.80
   8  -3   1   30.91    0.80
  -7   3  -2    1.23    0.09
   7  -3   2    1.33    0.10
  -6   3  -3   24.67    0.63
   6  -3   3   24.06    0.63
  -5   3  -4   10.78    0.30
   5  -3   4   10.78    0.30
  -4   3  -5    1.03    0.08
  -4   3  -5    0.94    0.08
  -4   3  -5    0.93    0.09
   4  -3   5    0.84    0.10
  -3   3  -6  126.10    3.06
  -3   3  -6  122.29    3.06
   3  -3   6  129.17    3.07
   3  -3   6  126.46    3.07
  -2   3  -7    1.87    0.09
  -2   3  -7    1.73    0.09
   2  -3   7    1.78    0.08
   2  -3   7    1.80    0.09
  -1   3  -8    0.27    0.06
  -1   3  -8    0.26    0.05
   1  -3   8    0.15    0.05
   1  -3   8    0.25    0.05
   0   3  -9   10.03    0.26
   0   3  -9    9.59    0.26
   0  -3   9    9.08    0.26
   0  -3   9    9.77    0.26
   1   3 -10   11.26    0.31
  -1  -3  10   11.62    0.28
  -1  -3  10   11.62    0.31
   2   3 -11   29.73    0.77
   2   3 -11   31.45    0.78
  -2  -3  11   31.66    0.78
   3   3 -12   55.88    1.40
  -3  -3  12   57.89    1.41
   4   3 -13   20.77    0.54
  -4  -3  13   21.03    0.55
   5   3 -14    0.60    0.08
   5   3 -14    0.56    0.03
  -5  -3  14    0.56    0.09
   6   3 -15    1.38    0.11
  -6  -3  15    1.32    0.12
   7   3 -16    4.17    0.18
  -7  -3  16    4.20    0.18
   8   3 -17    6.25    0.22
  -8  -3  17    6.19    0.23
   9   3 -18    1.64    0.14
  -9  -3  18    1.57    0.14
  10   3 -19    3.22    0.16
 -10  -3  19    3.11    0.18
 -13   4   3    0.09    0.07
  13  -4  -3    0.04    0.08
 -12   4   2    0.08    0.07
  12  -4  -2   -0.05    0.08
 -11   4   1    0.83    0.11
  11  -4  -1    0.55    0.12
 -10   4   0    1.52    0.14
  -9   4  -1    3.36    0.15
   9  -4   1    3.70    0.17
  -8   4  -2    3.82    0.15
   8  -4   2    3.92    0.17
  -7   4  -3   16.97    0.46
   7  -4   3   17.64    0.47
  -6   4  -4    6.03    0.19
   6  -4   4    5.66    0.19
  -5   4  -5    1.61    0.10
   5  -4   5    1.69    0.11
  -4   4  -6   57.83    1.49
  -4   4  -6   61.72    1.49
  -4   4  -6   62.81    1.49
   4  -4   6   59.24    1.49
  -3   4  -7    1.91    0.11
  -3   4  -7    2.06    0.11
   3  -4   7    1.93    0.12
  -2   4  -8   32.41    0.83
  -2   4  -8   31.74    0.81
   2  -4   8   33.54    0.82
  -1   4  -9    1.09    0.08
   1  -4   9    1.05    0.10
   0   4 -10    1.20    0.08
   0   4 -10    1.19    0.08
   0  -4  10    0.97    0.10
   1   4 -11   13.77    0.38
   1   4 -11   14.77    0.38
  -1  -4  11   14.61    0.36
  -1  -4  11   14.82    0.39
   2   4 -12   11.62    0.33
   2   4 -12   12.40    0.33
  -2  -4  12   12.71    0.36
   3   4 -13    1.74    0.10
  -3  -4  13    1.56    0.10
   4   4 -14    6.10    0.19
  -4  -4  14    5.96    0.20
   5   4 -15   11.18    0.32
  -5  -4  15   10.85    0.32
   6   4 -16    5.78    0.20
  -6  -4  16    5.62    0.21
   7   4 -17   29.33    0.77
  -7  -4  17   29.08    0.77
   8   4 -18    1.03    0.12
   9   4 -19    0.96    0.12
  -9  -4  19    0.85    0.13
  10   4 -20    0.94    0.13
 -10  -4  20    0.80    0.14
 -13   5   2    0.49    0.09
  13  -5  -2    0.38    0.10
 -12   5   1    0.01    0.07
  12  -5  -1   -0.12    0.08
 -11   5   0    0.07    0.06
  11  -5   0   -0.04    0.07
 -10   5  -1    2.17    0.13
  10  -5   1    2.43    0.16
  -9   5  -2   10.96    0.33
   9  -5   2   11.39    0.34
  -8   5  -3    2.52    0.13
   8  -5   3    2.50    0.14
  -7   5  -4    4.89    0.17
   7  -5   4    5.05    0.18
  -6   5  -5   17.46    0.46
   6  -5   5   17.09    0.46
  -5   5  -6   18.41    0.49
  -5   5  -6   18.80    0.48
   5  -5   6   18.45    0.49
  -4   5  -7    2.82    0.12
  -4   5  -7    3.06    0.12
   4  -5   7    2.89    0.13
  -3   5  -8   18.25    0.50
  -3   5  -8   20.26    0.50
  -2   5  -9   11.60    0.31
  -2   5  -9   10.73    0.30
   2  -5   9   11.44    0.31
  -1   5 -10    1.06    0.09
  -1   5 -10    1.21    0.08
   1  -5  10    1.13    0.10
   0   5 -11    5.79    0.17
   0   5 -11    5.27    0.17
   0  -5  11    5.50    0.18
   0  -5  11    5.43    0.16
   1   5 -12    0.27    0.05
   1   5 -12    0.33    0.06
  -1  -5  12    0.41    0.04
   2   5 -13   10.11    0.29
   2   5 -13   11.04    0.29
  -2  -5  13   11.39    0.31
  -2  -5  13   10.64    0.27
   3   5 -14    0.15    0.04
  -3  -5  14    0.16    0.06
   4   5 -15    0.64    0.08
  -4  -5  15    0.52    0.09
  -5  -5  16    0.40    0.07
   6   5 -17    8.73    0.27
  -6  -5  17    8.55    0.28
   7   5 -18   -0.01    0.06
  -7  -5  18    0.01    0.07
   8   5 -19    0.11    0.06
  -8  -5  19    0.19    0.08
   9   5 -20    0.22    0.07
  -9  -5  20    0.29    0.09
  10   5 -21    1.98    0.15
 -10  -5  21    2.01    0.19
 -13   6   1    2.96    0.15
  13  -6  -1    3.03    0.19
 -12   6   0    2.43    0.15
  12  -6   0    2.51    0.17
 -11   6  -1    7.16    0.25
  11  -6   1    7.22    0.27
 -10   6  -2    2.62    0.14
  10  -6   2    2.55    0.16
   9  -6   3    3.98    0.18
  -8   6  -4    0.70    0.09
   8  -6   4    0.94    0.12
  -7   6  -5    0.86    0.09
   7  -6   5    0.72    0.11
  -6   6  -6    1.34    0.09
   6  -6   6    1.34    0.11
  -5   6  -7   15.13    0.40
  -5   6  -7   14.59    0.40
   5  -6   7   14.84    0.41
  -4   6  -8   20.55    0.54
  -4   6  -8   20.99    0.54
   4  -6   8   21.05    0.55
  -3   6  -9    0.79    0.07
  -3   6  -9    0.71    0.07
   3  -6   9    0.69    0.09
  -2   6 -10    2.28    0.10
  -2   6 -10    2.19    0.10
   2  -6  10    2.15    0.12
  -1   6 -11    3.23    0.12
  -1   6 -11    3.57    0.12
   1  -6  11    3.34    0.16
   0   6 -12    0.55    0.07
   0   6 -12    0.43    0.06
   0  -6  12    0.54    0.05
   0  -6  12    0.60    0.09
   1   6 -13    5.51    0.18
   1   6 -13    6.05    0.18
  -1  -6  13    6.00    0.16
  -1  -6  13    6.03    0.19
   2   6 -14    2.83    0.10
   2   6 -14    2.60    0.10
  -2  -6  14    2.69    0.08
  -2  -6  14    2.73    0.12
   3   6 -15    0.17    0.04
  -3  -6  15    0.25    0.06
   4   6 -16    1.15    0.08
  -4  -6  16    1.38    0.11
  -5  -6  17    0.86    0.11
   6   6 -18    0.32    0.07
  -6  -6  18    0.41    0.08
   7   6 -19    4.39    0.18
  -7  -6  19    4.51    0.19
   8   6 -20    0.17    0.06
  -8  -6  20    0.18    0.08
   9   6 -21    1.17    0.12
  -9  -6  21    1.01    0.14
 -12   7  -1    0.66    0.11
  12  -7   1    0.70    0.14
 -11   7  -2    0.18    0.07
  11  -7   2    0.01    0.08
 -10   7  -3   -0.11    0.06
  10  -7   3    0.01    0.08
  -9   7  -4    0.41    0.08
   9  -7   4    0.44    0.09
  -8   7  -5    0.39    0.07
   8  -7   5    0.44    0.08
  -7   7  -6    1.69    0.11
   7  -7   6    1.70    0.14
  -6   7  -7    1.07    0.09
   6  -7   7    0.90    0.11
  -5   7  -8    2.96    0.13
  -5   7  -8    2.93    0.12
   5  -7   8    2.97    0.14
  -4   7  -9    1.71    0.09
  -4   7  -9    1.77    0.11
   4  -7   9    1.76    0.10
  -3   7 -10    1.35    0.08
  -3   7 -10    1.28    0.08
   3  -7  10    1.37    0.09
  -2   7 -11    0.61    0.06
  -2   7 -11    0.69    0.07
   2  -7  11    0.61    0.08
  -1   7 -12    0.67    0.07
  -1   7 -12    0.83    0.06
   1  -7  12    0.71    0.08
   1  -7  12    0.89    0.10
   0   7 -13   17.08    0.43
   0   7 -13   15.54    0.43
   0  -7  13   16.89    0.44
   0  -7  13   16.32    0.42
   1   7 -14    1.45    0.08
   1   7 -14    1.32    0.07
  -1  -7  14    1.36    0.07
  -1  -7  14    1.53    0.10
   2   7 -15    1.72    0.07
   2   7 -15    1.76    0.08
  -2  -7  15    1.57    0.11
  -2  -7  15    1.78    0.06
   3   7 -16    2.29    0.10
  -3  -7  16    2.34    0.13
   4   7 -17    3.16    0.12
  -4  -7  17    3.11    0.16
   5   7 -18    2.91    0.12
  -5  -7  18    2.88    0.16
   6   7 -19    7.76    0.26
  -6  -7  19    8.27    0.27
  -7  -7  20    0.79    0.16
  -8  -7  21    4.89    0.22
 -12   8  -2    0.36    0.09
  12  -8   2    0.26    0.09
 -11   8  -3    0.10    0.06
  11  -8   3    0.27    0.09
 -10   8  -4    4.15    0.17
  10  -8   4    4.27    0.20
  -9   8  -5    1.52    0.12
   8  -8   6    3.96    0.18
  -7   8  -7    7.85    0.25
   7  -8   7    7.86    0.27
  -6   8  -8    9.35    0.28
   6  -8   8    9.38    0.29
  -5   8  -9    0.48    0.08
  -5   8  -9    0.50    0.08
   5  -8   9    0.46    0.07
  -4   8 -10    5.58    0.19
  -4   8 -10    5.41    0.18
   4  -8  10    5.47    0.20
  -3   8 -11    0.49    0.06
   3  -8  11    0.47    0.09
  -2   8 -12    1.19    0.07
  -2   8 -12    1.63    0.08
   2  -8  12    1.56    0.10
  -1   8 -13    0.69    0.06
  -1   8 -13    0.50    0.05
   1  -8  13    0.68    0.10
   1  -8  13    0.79    0.08
   0   8 -14    2.04    0.09
   0   8 -14    2.55    0.10
   0  -8  14    2.32    0.10
   0  -8  14    2.63    0.13
   1   8 -15    8.15    0.22
   1   8 -15    7.04    0.26
  -1  -8  15    7.72    0.21
  -1  -8  15    7.81    0.25
   2   8 -16    1.67    0.09
  -2  -8  16    1.78    0.11
  -2  -8  16    1.67    0.07
   3   8 -17    7.49    0.22
  -3  -8  17    7.17    0.24
   4   8 -18    0.08    0.04
  -4  -8  18   -0.01    0.06
   5   8 -19    4.37    0.15
  -5  -8  19    4.31    0.19
   6   8 -20    6.38    0.20
  -6  -8  20    6.19    0.23
   7   8 -21    0.59    0.08
  -7  -8  21    0.72    0.14
   8   8 -22    0.87    0.10
  -8  -8  22    1.04    0.15
 -11   9  -4    0.11    0.06
  11  -9   4    0.15    0.09
 -10   9  -5    0.75    0.11
  10  -9   5    0.69    0.13
  -9   9  -6    0.04    0.06
   9  -9   6    0.15    0.09
  -8   9  -7    1.17    0.10
   8  -9   7    1.27    0.13
  -7   9  -8    2.95    0.13
   7  -9   8    2.84    0.16
  -6   9  -9    7.20    0.22
   6  -9   9    6.88    0.24
  -5   9 -10    1.59    0.13
  -5   9 -10    1.51    0.09
   5  -9  10    1.40    0.12
  -4   9 -11    7.00    0.21
  -4   9 -11    6.56    0.23
   4  -9  11    6.75    0.23
  -3   9 -12   16.22    0.43
  -3   9 -12   16.11    0.45
   3  -9  12   16.21    0.45
  -2   9 -13    3.50    0.13
   2  -9  13    3.86    0.14
   2  -9  13    3.46    0.15
  -1   9 -14    0.61    0.06
   1  -9  14    0.59    0.08
   1  -9  14    0.48    0.09
   0   9 -15    1.00    0.07
   0  -9  15    1.01    0.10
   0  -9  15    0.90    0.09
   1   9 -16    3.73    0.13
  -1  -9  16    3.64    0.13
  -1  -9  16    3.74    0.16
   2   9 -17    1.84    0.09
  -2  -9  17    1.85    0.12
   3   9 -18    2.73    0.11
  -3  -9  18    2.72    0.14
   4   9 -19    0.49    0.07
  -4  -9  19    0.49    0.10
  -5  -9  20    2.91    0.15
   6   9 -21    0.89    0.08
  -6  -9  21    0.67    0.12
   7   9 -22   -0.04    0.05
  -7  -9  22    0.26    0.12
 -11  10  -5    1.25    0.12
  11 -10   5    1.39    0.16
 -10  10  -6    0.06    0.06
  10 -10   6    0.25    0.09
  -9  10  -7    0.02    0.06
   9 -10   7    0.26    0.08
  -8  10  -8    0.13    0.06
  -7  10  -9    7.52    0.24
   7 -10   9    7.51    0.26
  -6  10 -10   13.49    0.38
   6 -10  10   13.95    0.40
  -5  10 -11    1.37    0.09
  -5  10 -11    1.31    0.13
   5 -10  11    1.38    0.13
  -4  10 -12    1.21    0.08
  -4  10 -12    1.13    0.12
   4 -10  12    1.14    0.12
  -3  10 -13    0.70    0.14
  -3  10 -13    0.84    0.07
   3 -10  13    0.96    0.11
   3 -10  13    0.78    0.11
  -2  10 -14   16.22    0.43
   2 -10  14   15.69    0.43
   2 -10  14   16.41    0.45
  -1  10 -15    7.98    0.23
   1 -10  15    8.20    0.26
   1 -10  15    8.02    0.24
   0  10 -16    6.38    0.19
   0 -10  16    6.43    0.22
   0 -10  16    6.46    0.19
   1  10 -17    8.48    0.23
  -1 -10  17    7.99    0.26
   2  10 -18    3.34    0.12
  -2 -10  18    3.21    0.15
   3  10 -19    1.70    0.08
  -3 -10  19    1.79    0.12
   4  10 -20    0.22    0.04
  -4 -10  20    0.14    0.08
   5  10 -21    0.05    0.06
 -10  11  -7    1.18    0.12
  10 -11   7    0.82    0.15
  -9  11  -8    0.17    0.06
   9 -11   8    0.32    0.09
  -8  11  -9    5.21    0.19
   8 -11   9    5.10    0.22
  -7  11 -10    0.24    0.06
   6 -11  11    6.40    0.24
  -5  11 -12    0.06    0.04
  -5  11 -12    0.07    0.08
   5 -11  12    0.12    0.07
  -4  11 -13    0.57    0.12
  -4  11 -13    0.30    0.06
   4 -11  13    0.49    0.11
  -3  11 -14    5.68    0.18
  -3  11 -14    6.05    0.22
   3 -11  14    5.84    0.21
   3 -11  14    5.86    0.21
  -2  11 -15    7.33    0.21
   2 -11  15    7.33    0.24
   2 -11  15    7.09    0.23
  -1  11 -16    1.24    0.07
   1 -11  16    0.85    0.11
   1 -11  16    1.24    0.09
   0  11 -17    0.78    0.06
   0 -11  17    0.88    0.10
   1  11 -18    0.19    0.04
  -1 -11  18    0.20    0.07
   2  11 -19    0.16    0.05
   9 -12   9    0.63    0.13
  -8  12 -10    2.33    0.12
   8 -12  10    2.18    0.16
  -7  12 -11    0.52    0.08
   7 -12  11    0.29    0.08
  -6  12 -12   -0.07    0.05
   6 -12  12   -0.02    0.08
  -5  12 -13   -0.15    0.08
   5 -12  13   -0.06    0.07
   5 -12  13    0.08    0.08
  -4  12 -14    1.08    0.13
  -4  12 -14    1.18    0.08
   4 -12  14    1.14    0.12
   4 -12  14    1.20    0.12
  -3  12 -15    0.20    0.04
  -3  12 -15    0.20    0.08
   3 -12  15    0.26    0.08
  -2  12 -16    0.23    0.08
  -2  12 -16    0.29    0.06
   2 -12  16    0.24    0.09
   2 -12  16    0.47    0.09
  -7  13 -12    0.63    0.10
   7 -13  12    0.74    0.14
   6 -13  13    0.96    0.14
  -5  13 -14    0.26    0.10
   5 -13  14    0.04    0.08
  -4  13 -15    0.43    0.09
   4 -13  15    0.32    0.07
  -3  13 -16    0.03    0.09
  -2  13 -17    0.05    0.09
  -2 -16  10    0.10    0.07
   2  16 -10    0.21    0.09
  -1 -16   9    0.83    0.10
   1  16  -9    0.79    0.13
   0 -16   8    0.09    0.08
   0  16  -8    0.18    0.08
   1 -16   7    1.97    0.14
   2 -16   6    0.33    0.08
   3 -16   5   -0.06    0.08
   4 -16   4    0.04    0.07
   4  15 -11   -0.02    0.07
  -3 -15  10    0.16    0.07
   3  15 -10    0.14    0.07
  -2 -15   9    2.58    0.14
   2  15  -9    2.59    0.15
  -1 -15   8   16.57    0.47
   1  15  -8   16.75    0.47
   0 -15   7    0.42    0.08
   0  15  -7    0.37    0.08
   1 -15   6    9.58    0.30
   2 -15   5    0.14    0.07
   3 -15   4    0.08    0.07
   4 -15   3    0.09    0.08
   5 -15   2    3.08    0.17
   6 -15   1    0.05    0.09
  -4 -14  10    1.86    0.11
   4  14 -10    2.10    0.13
  -3 -14   9    0.70    0.10
   3  14  -9    0.59    0.11
  -2 -14   8    0.60    0.09
   2  14  -8    0.61    0.10
  -1 -14   7    3.35    0.16
   1  14  -7    3.36    0.16
   0  14  -6    0.89    0.12
   1 -14   5    1.73    0.15
   2 -14   4    1.38    0.13
   3 -14   3    7.09    0.26
   4 -14   2    7.10    0.25
   5 -14   1    2.01    0.16
   6 -14   0    3.65    0.18
   7 -14  -1    4.24    0.21
   8 -14  -2    0.22    0.10
  -5 -13  10    3.16    0.13
  -4 -13   9    2.94    0.13
  -3 -13   8    0.10    0.06
   3  13  -8    0.20    0.06
  -2 -13   7    0.76    0.11
   2  13  -7    0.63    0.10
  -1 -13   6    0.75    0.11
   1  13  -6    0.68    0.10
   0 -13   5    1.15    0.11
   0  13  -5    1.25    0.11
   1 -13   4    0.90    0.11
   2 -13   3    0.22    0.07
   3 -13   2    0.77    0.14
   4 -13   1    1.62    0.15
   5 -13   0    2.26    0.15
   6 -13  -1    5.12    0.22
   7 -13  -2    0.74    0.12
   8 -13  -3    0.39    0.10
   9 -13  -4    0.79    0.15
  -5 -12   9    1.79    0.11
  -4 -12   8    1.01    0.10
  -3 -12   7    5.06    0.19
   3  12  -7    5.40    0.19
  -2 -12   6    1.93    0.12
   2  12  -6    1.72    0.11
  -1 -12   5    0.89    0.10
   1  12  -5    1.01    0.10
   0 -12   4    2.29    0.13
   0  12  -4    2.29    0.12
   1 -12   3    0.04    0.07
   2 -12   2    1.30    0.10
   2 -12   2    1.20    0.13
   3 -12   1   14.40    0.39
   3 -12   1   14.66    0.42
   4 -12   0   27.88    0.72
   4 -12   0   27.80    0.77
   5 -12  -1    3.36    0.14
   5 -12  -1    3.71    0.18
   6 -12  -2    0.44    0.09
  -6  12   2    0.24    0.05
   7 -12  -3    0.06    0.08
   7 -12  -3    0.07    0.07
  -7  12   3   -0.01    0.04
   8 -12  -4    0.26    0.07
   8 -12  -4    0.65    0.13
   9 -12  -5    0.06    0.08
   9 -12  -5    0.02    0.09
  -9  12   5    0.02    0.05
  -5 -11   8    8.56    0.26
  -4 -11   7    0.78    0.09
  -3 -11   6    0.18    0.06
   3  11  -6    0.20    0.06
  -2 -11   5   11.19    0.32
  -2 -11   5   10.85    0.29
   2  11  -5   11.07    0.31
  -1 -11   4    1.00    0.10
  -1 -11   4    0.79    0.06
   1  11  -4    0.77    0.09
   0 -11   3    3.93    0.12
   0 -11   3    3.85    0.16
   0  11  -3    3.83    0.15
   1 -11   2    0.07    0.03
   1 -11   2    0.07    0.06
   2 -11   1    0.84    0.10
   2 -11   1    0.86    0.07
   3 -11   0    4.28    0.15
   3 -11   0    4.40    0.18
   4 -11  -1    1.44    0.13
   5 -11  -2    4.57    0.20
   5 -11  -2    4.49    0.16
  -5  11   2    4.43    0.13
   6 -11  -3    4.04    0.16
   6 -11  -3    3.87    0.18
  -6  11   3    4.14    0.13
   7 -11  -4    0.50    0.09
   7 -11  -4    0.50    0.10
  -7  11   4    0.36    0.06
   8 -11  -5    3.40    0.18
   8 -11  -5    3.45    0.17
   9 -11  -6    0.10    0.08
   9 -11  -6    0.10    0.09
  10 -11  -7    3.93    0.20
  10 -11  -7    3.65    0.19
 -10  11   7    3.61    0.16
  -5 -10   7   10.41    0.30
  -5 -10   7   10.33    0.29
  -4 -10   6    1.13    0.06
  -4 -10   6    1.35    0.10
  -3 -10   5    4.89    0.14
  -3 -10   5    4.91    0.17
  -2 -10   4    2.51    0.09
  -2 -10   4    2.72    0.12
   2  10  -4    2.44    0.11
  -1 -10   3    7.15    0.19
  -1 -10   3    7.18    0.19
  -1 -10   3    7.34    0.22
   1  10  -3    7.06    0.22
   0 -10   2    2.00    0.08
   0 -10   2    2.05    0.11
   0  10  -2    2.06    0.10
   1 -10   1    0.25    0.05
   1 -10   1    0.12    0.06
   2 -10   0   11.26    0.33
   2 -10   0   11.38    0.30
   3 -10  -1    1.70    0.09
   3 -10  -1    1.60    0.12
   4 -10  -2    1.53    0.10
   4 -10  -2    1.57    0.12
  -4  10   2    1.45    0.07
  -4  10   2    1.42    0.07
   5 -10  -3    1.20    0.10
   5 -10  -3    1.30    0.13
  -5  10   3    1.20    0.07
   6 -10  -4   24.54    0.64
   6 -10  -4   23.50    0.65
  -6  10   4   25.18    0.63
   7 -10  -5    1.71    0.14
   7 -10  -5    1.49    0.13
  -7  10   5    1.53    0.10
   8 -10  -6    0.26    0.09
   8 -10  -6    0.17    0.08
   9 -10  -7    0.03    0.08
  -9  10   7    0.00    0.06
  10 -10  -8    0.06    0.08
 -10  10   8    0.22    0.07
  -7  -9   8    2.38    0.11
  -6  -9   7    1.36    0.08
  -5  -9   6   15.66    0.41
  -5  -9   6   15.84    0.42
  -4  -9   5    1.31    0.07
  -4  -9   5    1.35    0.09
  -3  -9   4    7.97    0.23
  -3  -9   4    7.77    0.21
  -2  -9   3   14.91    0.40
   2   9  -3   14.71    0.39
  -1  -9   2    2.05    0.07
  -1  -9   2    2.18    0.11
   1   9  -2    2.28    0.10
   0  -9   1    3.37    0.10
   0  -9   1    3.50    0.13
   0   9  -1    3.54    0.13
   1  -9   0    0.75    0.04
   1  -9   0    0.80    0.06
   1  -9   0    0.87    0.09
   2  -9  -1    6.89    0.19
   2  -9  -1    6.97    0.22
   3  -9  -2    0.38    0.08
   3  -9  -2    0.47    0.06
  -3   9   2    0.41    0.04
  -3   9   2    0.38    0.04
   4  -9  -3    3.56    0.16
   4  -9  -3    3.62    0.14
  -4   9   3    3.76    0.12
  -4   9   3    3.37    0.11
   5  -9  -4    0.71    0.11
   5  -9  -4    0.64    0.09
  -5   9   4    0.58    0.06
  -5   9   4    0.71    0.07
   6  -9  -5    0.23    0.06
  -6   9   5    0.19    0.05
   7  -9  -6    0.16    0.07
  -7   9   6    0.18    0.05
   8  -9  -7    4.18    0.18
  -8   9   7    4.21    0.18
   9  -9  -8    0.19    0.11
  -9   9   8    0.03    0.06
  10  -9  -9    0.63    0.13
 -10   9   9    0.77    0.10
  11  -9 -10    1.36    0.17
 -11   9  10    1.64    0.13
  -9  -8   9    8.15    0.26
   9   8  -9    8.28    0.23
  -8  -8   8    2.54    0.12
   8   8  -8    2.56    0.09
  -7  -8   7    3.06    0.14
  -6  -8   6    0.50    0.06
  -5  -8   5    0.70    0.06
  -5  -8   5    0.61    0.08
  -4  -8   4    7.37    0.21
  -4  -8   4    7.16    0.20
  -3  -8   3    8.99    0.24
  -3  -8   3    9.53    0.24
  -3  -8   3    9.71    0.26
  -2  -8   2   22.52    0.56
  -2  -8   2   21.39    0.54
   2   8  -2   22.01    0.56
  -1  -8   1   11.00    0.30
  -1  -8   1   10.73    0.27
   1   8  -1   10.69    0.29
   0  -8   0    2.02    0.10
   0  -8   0    2.08    0.07
   1  -8  -1   10.87    0.28
   1  -8  -1   10.93    0.30
   1  -8  -1   10.47    0.28
   2  -8  -2   21.93    0.54
   2  -8  -2   21.39    0.56
   3  -8  -3    9.75    0.26
   3  -8  -3    9.47    0.28
  -3   8   3    9.72    0.25
  -3   8   3    9.61    0.25
   4  -8  -4    7.13    0.22
   4  -8  -4    7.42    0.23
  -4   8   4    6.96    0.20
  -4   8   4    7.31    0.20
   5  -8  -5    0.76    0.10
   5  -8  -5    0.89    0.09
  -5   8   5    0.66    0.06
  -5   8   5    0.63    0.06
   6  -8  -6    0.47    0.10
  -6   8   6    0.37    0.08
   7  -8  -7    2.95    0.16
  -7   8   7    2.99    0.14
   8  -8  -8    2.69    0.15
  -8   8   8    2.57    0.13
  -9   8   9    8.10    0.26
  10  -8 -10    0.18    0.08
 -10   8  10    0.28    0.07
  11  -8 -11    0.27    0.09
 -11   8  11    0.31    0.08
 -11  -7  10    0.21    0.08
 -10  -7   9    2.54    0.14
  10   7  -9    2.98    0.11
  -9  -7   8    3.31    0.14
   9   7  -8    3.32    0.12
  -8  -7   7    1.86    0.10
   8   7  -7    1.89    0.08
  -7  -7   6    4.82    0.20
   7   7  -6    5.25    0.15
  -6  -7   5    1.86    0.09
   6   7  -5    1.76    0.07
  -5  -7   4    0.56    0.05
  -4  -7   3    2.22    0.08
  -4  -7   3    2.38    0.10
  -4  -7   3    2.28    0.08
  -3  -7   2    1.30    0.06
  -3  -7   2    1.44    0.09
  -2  -7   1    3.11    0.12
   2   7  -1    3.02    0.11
  -1  -7   0    0.57    0.09
   1   7   0    0.55    0.08
   0  -7  -1    1.09    0.10
   0  -7  -1    1.00    0.04
   1  -7  -2    4.43    0.15
   1  -7  -2    4.28    0.12
   1  -7  -2    4.18    0.12
   2  -7  -3   52.49    1.27
   2  -7  -3   51.39    1.28
   2  -7  -3   49.78    1.26
  -2   7   3   52.02    1.25
  -2   7   3   52.45    1.26
   3  -7  -4    2.62    0.11
   3  -7  -4    2.59    0.12
  -3   7   4    2.59    0.10
  -3   7   4    2.58    0.09
   4  -7  -5    6.75    0.21
   4  -7  -5    7.02    0.21
  -4   7   5    6.85    0.19
  -4   7   5    6.52    0.20
   5  -7  -6    6.93    0.21
  -5   7   6    6.88    0.20
  -5   7   6    6.36    0.20
   6  -7  -7    0.18    0.06
  -6   7   7    0.07    0.05
   7  -7  -8    1.02    0.12
  -7   7   8    0.97    0.10
   8  -7  -9    0.68    0.12
  -8   7   9    0.86    0.10
  -9   7  10    0.13    0.06
  10  -7 -11    0.15    0.08
 -10   7  11    0.15    0.07
  11  -7 -12    0.00    0.09
 -11   7  12    0.07    0.08
 -12  -6  10    0.43    0.09
  12   6 -10    0.63    0.09
 -11  -6   9    1.71    0.12
  11   6  -9    1.78    0.11
 -10  -6   8    3.68    0.16
  10   6  -8    3.54    0.14
  -9  -6   7    2.27    0.12
   9   6  -7    2.52    0.11
  -8  -6   6    1.74    0.10
   8   6  -6    1.90    0.09
  -7  -6   5   19.80    0.54
   7   6  -5   19.62    0.50
   7   6  -5   20.43    0.51
  -6  -6   4    0.95    0.07
   6   6  -4    1.03    0.05
  -5  -6   3    3.92    0.13
   5   6  -3    3.94    0.11
   5   6  -3    3.81    0.11
  -4  -6   2   32.70    0.83
  -4  -6   2   32.17    0.81
  -4  -6   2   33.75    0.81
  -3  -6   1    1.96    0.07
  -3  -6   1    2.08    0.10
  -2  -6   0   25.01    0.62
   2   6   0   24.23    0.61
  -1  -6  -1   11.20    0.30
   0  -6  -2   17.20    0.45
   0  -6  -2   17.31    0.44
   0  -6  -2   17.71    0.43
   1  -6  -3    5.23    0.19
   1  -6  -3    5.22    0.16
   1  -6  -3    5.52    0.15
   1  -6  -3    5.52    0.15
   2  -6  -4   23.47    0.60
   2  -6  -4   22.64    0.59
   2  -6  -4   24.14    0.59
  -2   6   4   23.30    0.58
  -2   6   4   23.86    0.58
   3  -6  -5   25.70    0.64
   3  -6  -5   24.48    0.63
  -3   6   5   24.51    0.63
  -3   6   5   25.37    0.63
   4  -6  -6   22.71    0.58
   4  -6  -6   22.64    0.58
  -4   6   6   22.83    0.57
  -4   6   6   21.59    0.57
   5  -6  -7    7.70    0.23
  -5   6   7    7.06    0.23
  -5   6   7    7.59    0.22
   6  -6  -8    3.35    0.14
  -6   6   8    3.18    0.14
   7  -6  -9    3.95    0.17
  -7   6   9    3.88    0.16
   8  -6 -10    5.27    0.20
  -8   6  10    5.02    0.19
   9  -6 -11    0.28    0.10
  -9   6  11    0.35    0.08
  10  -6 -12    0.19    0.08
 -10   6  12    0.48    0.10
  11  -6 -13    1.70    0.16
 -11   6  13    1.49    0.14
 -12  -5   9    1.44    0.13
  12   5  -9    1.24    0.11
 -11  -5   8    0.10    0.07
  11   5  -8    0.17    0.06
 -10  -5   7   13.60    0.39
  10   5  -7   12.66    0.37
  -9  -5   6    1.50    0.11
   9   5  -6    1.52    0.10
  -8  -5   5    1.08    0.09
   8   5  -5    1.19    0.08
   8   5  -5    0.95    0.07
  -7  -5   4    1.71    0.10
   7   5  -4    1.72    0.08
   7   5  -4    1.49    0.07
  -6  -5   3    9.58    0.27
   6   5  -3   10.05    0.26
   6   5  -3    9.48    0.26
  -5  -5   2    8.66    0.23
   5   5  -2    8.30    0.22
   5   5  -2    8.64    0.22
  -4  -5   1    6.51    0.20
  -4  -5   1    6.56    0.18
  -4  -5   1    6.46    0.18
   4   5  -1    6.72    0.17
   4   5  -1    6.72    0.17
  -3  -5   0    0.16    0.05
  -3  -5   0    0.22    0.04
  -3  -5   0    0.21    0.04
  -2  -5  -1    3.23    0.11
   2   5   1    3.05    0.11
   2   5   1    3.15    0.10
  -1  -5  -2    2.25    0.08
  -1  -5  -2    2.40    0.10
   1   5   2    2.25    0.09
   0  -5  -3   22.06    0.55
   0  -5  -3   22.40    0.53
   0  -5  -3   21.81    0.54
   0   5   3   20.98    0.55
   1  -5  -4    2.14    0.09
   1  -5  -4    1.98    0.08
   1  -5  -4    2.04    0.07
  -1   5   4    2.11    0.06
  -1   5   4    2.17    0.06
  -1   5   4    2.00    0.10
   2  -5  -5    8.23    0.23
   2  -5  -5    8.78    0.24
   2  -5  -5    8.63    0.24
  -2   5   5    8.72    0.23
  -2   5   5    8.80    0.23
   3  -5  -6   10.62    0.29
  -3   5   6   10.45    0.28
  -3   5   6   10.40    0.29
   4  -5  -7   11.95    0.33
  -4   5   7   11.84    0.32
  -4   5   7   12.56    0.33
   5  -5  -8    4.28    0.16
  -5   5   8    4.54    0.16
   6  -5  -9   23.84    0.63
  -6   5   9   24.85    0.63
   7  -5 -10   16.91    0.48
  -7   5  10   17.66    0.47
   8  -5 -11   11.94    0.36
  -8   5  11   11.63    0.35
   9  -5 -12    0.82    0.13
  -9   5  12    0.96    0.12
  10  -5 -13    0.26    0.08
 -10   5  13    0.25    0.07
  11  -5 -14    1.30    0.15
 -11   5  14    1.35    0.13
 -13  -4   9    9.63    0.33
  13   4  -9    9.74    0.31
 -12  -4   8   14.90    0.44
  12   4  -8   14.72    0.42
 -11  -4   7    0.47    0.10
  11   4  -7    0.46    0.07
 -10  -4   6    0.03    0.06
  10   4  -6    0.02    0.06
  -9  -4   5    0.07    0.06
   9   4  -5    0.04    0.05
  -8  -4   4    1.54    0.09
   8   4  -4    1.50    0.09
  -7  -4   3    0.01    0.05
   7   4  -3    0.01    0.04
   7   4  -3    0.05    0.04
  -6  -4   2    3.51    0.12
   6   4  -2    3.35    0.11
   6   4  -2    3.60    0.12
  -5  -4   1   36.78    0.91
   5   4  -1   37.11    0.90
   5   4  -1   36.35    0.91
  -4  -4   0   12.24    0.31
  -4  -4   0   11.82    0.31
   4   4   0   12.05    0.30
   4   4   0   11.93    0.30
  -3  -4  -1    4.44    0.12
  -3  -4  -1    4.36    0.14
  -3  -4  -1    4.27    0.12
   3   4   1    4.43    0.11
   3   4   1    4.15    0.13
  -2  -4  -2   90.25    2.14
  -2  -4  -2   89.02    2.15
   2   4   2   85.69    2.15
  -1  -4  -3    6.18    0.17
  -1  -4  -3    6.22    0.16
  -1  -4  -3    6.24    0.15
   1   4   3    6.17    0.18
   0  -4  -4   48.98    1.19
   0  -4  -4   48.66    1.19
   0  -4  -4   49.25    1.20
   0   4   4   48.41    1.20
   1  -4  -5   21.81    0.54
   1  -4  -5   21.33    0.54
   1  -4  -5   21.45    0.54
  -1   4   5   22.01    0.54
  -1   4   5   21.98    0.54
  -1   4   5   21.57    0.55
   2  -4  -6    1.68    0.09
   2  -4  -6    1.60    0.08
   2  -4  -6    1.72    0.08
  -2   4   6    1.70    0.08
  -2   4   6    1.68    0.08
   3  -4  -7  104.28    2.50
   3  -4  -7  102.05    2.50
  -3   4   7  102.57    2.50
  -3   4   7  101.69    2.51
  -4   4   8    8.95    0.25
  -4   4   8    8.36    0.25
   5  -4  -9    1.46    0.10
  -5   4   9    1.57    0.09
   6  -4 -10    3.88    0.15
  -6   4  10    3.66    0.15
   7  -4 -11   10.66    0.32
  -7   4  11   10.76    0.32
   8  -4 -12    0.13    0.08
  -8   4  12    0.18    0.07
   9  -4 -13   43.03    1.10
  -9   4  13   42.50    1.10
  10  -4 -14    1.20    0.13
 -10   4  14    1.19    0.12
  11  -4 -15    5.79    0.24
 -11   4  15    5.63    0.23
 -13  -3   8    0.13    0.08
  13   3  -8    0.14    0.08
 -12  -3   7    1.29    0.13
  12   3  -7    1.25    0.12
 -11  -3   6    3.89    0.17
  11   3  -6    3.57    0.17
 -10  -3   5    0.49    0.10
  10   3  -5    0.33    0.07
  -9  -3   4    4.23    0.16
   9   3  -4    4.28    0.16
  -8  -3   3    0.67    0.08
   8   3  -3    0.54    0.07
  -7  -3   2    0.35    0.08
   7   3  -2    0.22    0.05
   7   3  -2    0.29    0.06
  -6  -3   1    6.13    0.19
   6   3  -1    6.33    0.18
   6   3  -1    5.74    0.18
  -5  -3   0    6.76    0.20
   5   3   0    6.92    0.19
   5   3   0    6.88    0.20
  -4  -3  -1    1.80    0.08
  -4  -3  -1    1.81    0.08
   4   3   1    1.79    0.07
   4   3   1    1.83    0.08
   4   3   1    1.75    0.08
  -3  -3  -2   43.29    1.03
  -3  -3  -2   41.78    1.03
   3   3   2   41.13    1.02
   3   3   2   41.96    1.02
   3   3   2   41.90    1.03
  -2  -3  -3   41.19    1.02
  -2  -3  -3   41.82    1.01
  -2  -3  -3   42.23    1.01
  -2  -3  -3   42.29    1.01
   2   3   3   41.30    1.02
   2   3   3   41.29    1.01
   2   3   3   40.14    1.01
  -1  -3  -4    1.68    0.06
  -1  -3  -4    1.63    0.07
  -1  -3  -4    1.74    0.06
   1   3   4    1.70    0.05
   1   3   4    1.68    0.05
   1   3   4    1.73    0.07
   0  -3  -5   13.48    0.34
   0  -3  -5   13.33    0.34
   0  -3  -5   13.38    0.34
   0   3   5   13.24    0.33
   0   3   5   13.33    0.33
   0   3   5   13.71    0.34
   1  -3  -6  204.97    5.13
  -1   3   6  209.43    5.12
  -1   3   6  215.24    5.12
   2  -3  -7   16.28    0.43
   2  -3  -7   17.40    0.43
   2  -3  -7   17.30    0.43
  -2   3   7   16.60    0.43
  -2   3   7   17.05    0.43
   3  -3  -8    5.74    0.17
   3  -3  -8    5.53    0.18
  -3   3   8    5.49    0.17
   4  -3  -9  178.26    4.45
  -4   3   9  187.92    4.45
   5  -3 -10    3.86    0.15
  -5   3  10    3.81    0.15
   6  -3 -11   26.84    0.69
  -6   3  11   26.12    0.68
   7  -3 -12    2.11    0.13
  -7   3  12    2.18    0.13
   8  -3 -13   49.71    1.28
  -8   3  13   51.35    1.28
   9  -3 -14    0.10    0.08
  -9   3  14    0.13    0.07
  10  -3 -15    2.43    0.16
 -10   3  15    2.48    0.15
  11  -3 -16    0.77    0.14
 -11   3  16    1.09    0.12
 -13  -2   7    0.33    0.09
 -12  -2   6    7.33    0.26
  12   2  -6    7.30    0.26
 -11  -2   5    0.23    0.07
  11   2  -5    0.13    0.08
 -10  -2   4    8.15    0.27
  10   2  -4    8.35    0.27
  -9  -2   3    4.95    0.18
   9   2  -3    4.64    0.17
  -8  -2   2    2.41    0.11
   8   2  -2    2.54    0.12
  -7  -2   1    5.20    0.17
   7   2  -1    5.31    0.17
  -6  -2   0   16.30    0.43
   6   2   0   16.67    0.42
   6   2   0   15.53    0.42
  -5  -2  -1    2.71    0.11
   5   2   1    2.73    0.11
   5   2   1    2.71    0.10
  -4  -2  -2   13.21    0.34
  -4  -2  -2   13.49    0.34
   4   2   2   13.52    0.34
   4   2   2   13.04    0.34
  -3  -2  -3    0.85    0.06
  -3  -2  -3    0.95    0.06
   3   2   3    0.89    0.05
   3   2   3    0.93    0.05
   3   2   3    0.86    0.05
  -2  -2  -4    2.99    0.09
  -2  -2  -4    2.95    0.09
   2   2   4    3.01    0.09
   2   2   4    2.97    0.09
   2   2   4    2.96    0.09
  -1  -2  -5  427.45   10.19
  -1  -2  -5  394.37   10.18
  -1  -2  -5  426.38   10.20
   1   2   5  418.30   10.18
   1   2   5  419.98   10.20
   1   2   5  431.32   10.19
   0  -2  -6    1.27    0.06
   0  -2  -6    1.37    0.06
   0  -2  -6    1.29    0.06
   0   2   6    1.34    0.06
   0   2   6    1.38    0.06
   0   2   6    1.30    0.06
   1  -2  -7    1.22    0.07
   1  -2  -7    1.19    0.07
   1  -2  -7    1.22    0.06
  -1   2   7    1.17    0.07
  -1   2   7    1.21    0.06
  -1   2   7    1.26    0.07
   2  -2  -8   56.89    1.41
   2  -2  -8   58.11    1.41
   2  -2  -8   57.74    1.40
  -2   2   8   56.87    1.41
  -2   2   8   57.67    1.41
   3  -2  -9   40.65    1.02
   3  -2  -9   40.08    1.01
  -3   2   9   41.01    1.01
  -3   2   9   41.87    1.02
   4  -2 -10   54.62    1.34
  -4   2  10   53.34    1.34
   5  -2 -11   12.85    0.35
  -5   2  11   12.23    0.35
   6  -2 -12   16.54    0.45
  -6   2  12   16.64    0.45
   7  -2 -13   11.13    0.33
  -7   2  13   11.43    0.33
   8  -2 -14   14.67    0.43
  -8   2  14   15.09    0.43
   9  -2 -15    0.71    0.13
  -9   2  15    0.78    0.12
  10  -2 -16    0.70    0.12
 -10   2  16    0.38    0.08
  11  -2 -17    0.11    0.08
 -11   2  17    0.23    0.09
 -13  -1   6    2.34    0.15
  13   1  -6    2.54    0.16
 -12  -1   5    4.61    0.20
  12   1  -5    4.77    0.19
  11   1  -4    7.48    0.26
 -10  -1   3    3.84    0.17
  10   1  -3    4.28    0.17
  -9  -1   2    3.28    0.15
   9   1  -2    3.43    0.15
  -8  -1   1    1.29    0.09
   8   1  -1    1.35    0.09
  -7  -1   0    7.07    0.22
   7   1   0    7.33    0.22
  -6  -1  -1    3.73    0.16
   6   1   1    3.96    0.14
   6   1   1    3.51    0.13
  -5  -1  -2    4.76    0.16
   5   1   2    4.80    0.15
  -4  -1  -3    3.87    0.13
  -4  -1  -3    4.09    0.13
   4   1   3    3.85    0.12
   4   1   3    3.87    0.13
  -3  -1  -4    0.35    0.03
  -3  -1  -4    0.39    0.05
  -3  -1  -4    0.30    0.05
   3   1   4    0.29    0.05
   3   1   4    0.36    0.05
  -2  -1  -5    0.43    0.05
  -2  -1  -5    0.40    0.06
   2   1   5    0.39    0.05
   2   1   5    0.38    0.05
  -1  -1  -6   74.89    1.85
  -1  -1  -6   77.59    1.85
   1   1   6   73.82    1.85
   1   1   6   78.57    1.84
   1   1   6   75.24    1.85
   0  -1  -7   22.57    0.56
   0  -1  -7   22.07    0.55
   0  -1  -7   22.42    0.56
   0   1   7   23.10    0.55
   0   1   7   23.05    0.56
   0   1   7   21.95    0.56
   1  -1  -8    3.80    0.13
   1  -1  -8    4.06    0.11
   1  -1  -8    3.88    0.12
  -1   1   8    4.00    0.13
  -1   1   8    3.87    0.12
  -1   1   8    4.06    0.11
   2  -1  -9    2.91    0.11
   2  -1  -9    3.10    0.11
   2  -1  -9    3.06    0.09
  -2   1   9    3.23    0.12
  -2   1   9    2.96    0.11
   3  -1 -10   71.46    1.68
   3  -1 -10   63.58    1.70
  -3   1  10   71.53    1.69
   4  -1 -11    2.87    0.13
  -4   1  11    2.90    0.13
   5  -1 -12    9.67    0.28
  -5   1  12    9.30    0.28
   6  -1 -13    3.64    0.15
  -6   1  13    3.54    0.15
   7  -1 -14    0.71    0.11
  -7   1  14    0.63    0.11
   8  -1 -15    0.71    0.14
  -8   1  15    0.67    0.11
   9  -1 -16    2.51    0.16
  -9   1  16    2.62    0.15
  10  -1 -17    1.60    0.14
 -10   1  17    1.23    0.13
  11  -1 -18    2.01    0.17
 -11   1  18    1.92    0.16
 -13   0   5    0.02    0.07
  13   0  -5    0.11    0.08
 -12   0   4    0.34    0.08
  12   0  -4    0.34    0.08
  11   0  -3   -0.03    0.07
 -10   0   2    0.16    0.07
  10   0  -2    0.14    0.07
  -9   0   1   -0.08    0.05
   9   0  -1    0.02    0.06
  -8   0   0   17.41    0.47
   8   0   0   17.97    0.47
  -7   0  -1    0.53    0.08
   7   0   1    0.47    0.08
  -6   0  -2   13.14    0.35
   6   0   2   12.92    0.35
   6   0   2   12.51    0.33
  -5   0  -3    3.67    0.14
   5   0   3    3.57    0.14
   5   0   3    3.56    0.13
   5   0   3    3.73    0.11
  -4   0  -4   20.52    0.51
  -4   0  -4   18.94    0.51
   4   0   4   19.72    0.51
   4   0   4   20.96    0.51
  -3   0  -5    0.68    0.06
  -3   0  -5    0.74    0.06
   3   0   5    0.72    0.06
   3   0   5    0.77    0.06
  -2   0  -6    7.97    0.21
  -2   0  -6    8.13    0.21
   2   0   6    7.61    0.21
   2   0   6    7.81    0.21
  -1   0  -7    0.20    0.04
  -1   0  -7    0.19    0.04
   1   0   7    0.24    0.05
   1   0   7    0.21    0.04
   0   0  -8    2.02    0.08
   0   0  -8    2.03    0.09
   0   0   8    2.12    0.08
   0   0   8    2.15    0.09
   0   0   8    2.14    0.06
   1   0  -9    0.06    0.04
   1   0  -9    0.04    0.01
   1   0  -9   -0.01    0.04
  -1   0   9    0.04    0.04
  -1   0   9    0.01    0.04
  -1   0   9    0.02    0.02
   2   0 -10   24.46    0.64
   2   0 -10   26.29    0.64
   2   0 -10   25.93    0.62
  -2   0  10   26.14    0.64
  -2   0  10   24.08    0.64
   3   0 -11    0.57    0.05
   3   0 -11    0.51    0.08
  -3   0  11    0.51    0.10
   4   0 -12   14.62    0.39
  -4   0  12   14.17    0.39
   5   0 -13   -0.05    0.04
  -5   0  13    0.04    0.06
   6   0 -14    4.66    0.17
  -6   0  14    4.74    0.18
   7   0 -15    1.95    0.13
  -7   0  15    1.87    0.14
   8   0 -16   -0.03    0.08
  -8   0  16    0.03    0.08
   9   0 -17   -0.02    0.07
  -9   0  17    0.09    0.08
  10   0 -18    0.72    0.14
 -10   0  18    0.77    0.13
  11   0 -19    0.14    0.08
 -11   0  19    0.02    0.08
 -13   1   4    1.58    0.14
  13  -1  -4    1.57    0.16
 -12   1   3   20.34    0.57
  12  -1  -3   20.05    0.56
 -11   1   2    4.83    0.20
  11  -1  -2    5.20    0.21
 -10   1   1    5.30    0.20
  10  -1  -1    5.05    0.20
  -9   1   0    4.96    0.19
   9  -1   0    5.15    0.19
  -8   1  -1    1.57    0.10
   8  -1   1    1.61    0.11
  -7   1  -2    2.31    0.11
   7  -1   2    2.18    0.09
   7  -1   2    2.30    0.12
  -6   1  -3   27.84    0.69
   6  -1   3   26.36    0.68
   6  -1   3   27.32    0.69
  -5   1  -4   12.27    0.34
   5  -1   4   13.11    0.35
  -4   1  -5    4.18    0.14
  -4   1  -5    3.88    0.14
  -4   1  -5    4.09    0.12
   4  -1   5    4.02    0.14
   4  -1   5    4.00    0.13
  -3   1  -6    0.91    0.07
  -3   1  -6    0.91    0.07
   3  -1   6    0.87    0.08
   3  -1   6    0.90    0.07
  -2   1  -7    0.38    0.06
  -2   1  -7    0.46    0.06
   2  -1   7    0.41    0.05
   2  -1   7    0.44    0.06
  -1   1  -8   10.45    0.28
  -1   1  -8   10.63    0.28
   1  -1   8   10.77    0.28
   0   1  -9    1.81    0.09
   0  -1   9    1.79    0.08
   0  -1   9    1.88    0.09
   1   1 -10   18.80    0.48
   1   1 -10   18.67    0.48
  -1  -1  10   17.40    0.47
  -1  -1  10   19.32    0.48
   2   1 -11   35.21    0.86
   2   1 -11   33.78    0.86
   3   1 -12    0.11    0.05
  -3  -1  12    0.18    0.06
   4   1 -13    1.09    0.05
   4   1 -13    1.32    0.09
  -4  -1  13    1.29    0.10
   5   1 -14    6.51    0.21
  -5  -1  14    6.41    0.21
   6   1 -15    8.81    0.27
  -6  -1  15    9.10    0.28
   7   1 -16   13.20    0.38
  -7  -1  16   12.72    0.38
   8   1 -17    2.62    0.15
   9   1 -18    1.69    0.14
  -9  -1  18    1.55    0.14
  10   1 -19   12.10    0.38
 -10  -1  19   11.94    0.38
  11   1 -20    0.42    0.09
 -11  -1  20    0.71    0.15
 -13   2   3    0.15    0.08
  13  -2  -3    0.29    0.08
 -12   2   2    0.17    0.07
  12  -2  -2    0.00    0.08
 -11   2   1    2.13    0.14
  11  -2  -1    2.27    0.15
 -10   2   0    3.13    0.15
  10  -2   0    3.18    0.16
  -9   2  -1    5.72    0.20
   9  -2   1    5.59    0.21
  -8   2  -2    9.48    0.28
   8  -2   2    9.39    0.28
  -7   2  -3    5.32    0.17
   7  -2   3    5.15    0.18
  -6   2  -4   27.92    0.71
   6  -2   4   28.21    0.72
  -5   2  -5    4.34    0.16
   5  -2   5    4.10    0.16
  -4   2  -6    6.37    0.18
  -4   2  -6    6.44    0.22
  -3   2  -7  121.93    2.93
  -3   2  -7  119.85    2.93
   3  -2   7  121.18    2.93
   3  -2   7  118.51    2.93
  -2   2  -8    4.61    0.14
  -2   2  -8    4.41    0.14
   2  -2   8    4.20    0.14
   2  -2   8    4.57    0.15
  -1   2  -9    0.08    0.04
  -1   2  -9    0.11    0.04
   1  -2   9    0.10    0.05
   1  -2   9    0.19    0.03
   0   2 -10    6.56    0.20
   0   2 -10    7.06    0.20
   0  -2  10    6.64    0.20
   0  -2  10    7.07    0.21
   1   2 -11   41.03    1.03
   1   2 -11   42.32    1.03
  -1  -2  11   41.76    1.04
   2   2 -12   56.04    1.41
  -2  -2  12   58.15    1.41
   3   2 -13    2.04    0.11
  -3  -2  13    1.85    0.11
   4   2 -14    4.00    0.15
  -4  -2  14    3.89    0.15
   5   2 -15    1.53    0.10
   5   2 -15    1.38    0.05
  -5  -2  15    1.45    0.11
   6   2 -16    4.36    0.17
  -6  -2  16    4.32    0.18
   7   2 -17    0.51    0.12
  -7  -2  17    0.46    0.08
   8   2 -18    3.46    0.18
  -8  -2  18    3.49    0.18
   9   2 -19    0.55    0.13
  -9  -2  19    0.44    0.09
  10   2 -20    1.95    0.15
 -10  -2  20    2.06    0.16
 -13   3   2    2.75    0.16
  13  -3  -2    2.69    0.17
 -12   3   1    8.83    0.29
  12  -3  -1    8.30    0.29
 -11   3   0    1.43    0.12
  11  -3   0    1.55    0.14
 -10   3  -1    7.70    0.28
  -9   3  -2    0.66    0.10
   9  -3   2    0.59    0.11
  -8   3  -3    3.83    0.16
   8  -3   3    3.98    0.17
  -7   3  -4   13.57    0.37
   7  -3   4   13.33    0.37
  -6   3  -5   11.29    0.32
   6  -3   5   11.74    0.32
  -5   3  -6   26.94    0.68
   5  -3   6   26.68    0.69
  -4   3  -7   24.55    0.61
  -4   3  -7   23.58    0.60
   4  -3   7   23.63    0.62
  -3   3  -8   92.87    2.30
  -3   3  -8   96.42    2.30
   3  -3   8   93.46    2.32
  -2   3  -9   13.59    0.38
  -2   3  -9   14.74    0.38
   2  -3   9   14.56    0.38
  -1   3 -10    3.20    0.12
  -1   3 -10    2.93    0.12
   1  -3  10    2.90    0.13
   0   3 -11   24.72    0.61
   0   3 -11   23.61    0.61
   0  -3  11   24.03    0.62
   1   3 -12   18.99    0.48
   1   3 -12   17.42    0.48
  -1  -3  12   18.78    0.50
   2   3 -13   24.42    0.62
  -2  -3  13   24.33    0.63
   3   3 -14   31.42    0.80
  -3  -3  14   31.55    0.80
   4   3 -15    4.06    0.15
  -4  -3  15    4.01    0.16
   5   3 -16    0.54    0.09
  -5  -3  16    0.52    0.10
   6   3 -17    1.41    0.12
  -6  -3  17    1.22    0.13
   7   3 -18    0.00    0.08
  -7  -3  18    0.10    0.07
   8   3 -19    1.47    0.13
  -8  -3  19    1.34    0.14
   9   3 -20    2.10    0.15
  -9  -3  20    2.26    0.15
  10   3 -21    0.03    0.07
 -10  -3  21    0.09    0.09
 -13   4   1    4.57    0.20
  13  -4  -1    4.71    0.21
 -12   4   0    2.82    0.15
  12  -4   0    2.92    0.17
 -11   4  -1    0.90    0.11
  11  -4   1    0.94    0.13
 -10   4  -2    4.62    0.18
  10  -4   2    4.00    0.25
  -9   4  -3    1.37    0.11
   9  -4   3    1.50    0.13
  -8   4  -4    2.81    0.13
   8  -4   4    2.72    0.14
  -7   4  -5   12.98    0.37
   7  -4   5   13.89    0.38
  -6   4  -6    1.76    0.10
   6  -4   6    1.80    0.10
  -5   4  -7    2.19    0.10
  -5   4  -7    2.11    0.10
   5  -4   7    2.04    0.12
  -4   4  -8   14.45    0.39
  -4   4  -8   14.29    0.38
   4  -4   8   14.73    0.39
  -3   4  -9    0.85    0.08
   3  -4   9    0.95    0.11
  -2   4 -10   60.69    1.48
  -2   4 -10   59.24    1.48
  -1   4 -11    3.28    0.12
  -1   4 -11    3.28    0.13
   0   4 -12   12.93    0.34
   0   4 -12   11.88    0.34
   0  -4  12   12.80    0.35
   1   4 -13    0.67    0.07
  -1  -4  13    0.78    0.10
  -1  -4  13    0.78    0.04
   2   4 -14    5.89    0.18
  -2  -4  14    5.82    0.19
   3   4 -15    3.42    0.13
  -3  -4  15    3.38    0.14
   4   4 -16    0.85    0.09
  -4  -4  16    0.84    0.10
   5   4 -17    1.79    0.12
  -5  -4  17    2.00    0.13
   6   4 -18    0.87    0.11
  -6  -4  18    0.84    0.12
   7   4 -19    3.85    0.17
  -7  -4  19    4.10    0.18
   8   4 -20    0.28    0.07
  -8  -4  20    0.13    0.08
   9   4 -21    8.90    0.29
  -9  -4  21    9.01    0.31
 -13   5   0    1.72    0.14
  13  -5   0    1.84    0.16
 -12   5  -1    4.28    0.19
  12  -5   1    4.18    0.20
 -11   5  -2    2.14    0.13
  11  -5   2    2.11    0.16
 -10   5  -3    0.32    0.07
  10  -5   3    0.21    0.08
  -9   5  -4   16.23    0.46
   9  -5   4   16.40    0.46
  -8   5  -5    2.67    0.13
   8  -5   5    2.71    0.15
  -7   5  -6    1.02    0.09
   7  -5   6    0.98    0.11
  -6   5  -7    2.24    0.11
   6  -5   7    2.41    0.13
  -5   5  -8    3.22    0.13
  -5   5  -8    3.35    0.14
   5  -5   8    3.37    0.14
  -4   5  -9   11.21    0.31
  -4   5  -9   11.38    0.31
   4  -5   9   11.35    0.32
  -3   5 -10    1.68    0.09
   3  -5  10    1.63    0.11
  -2   5 -11    0.06    0.04
   2  -5  11    0.10    0.06
  -1   5 -12    7.23    0.21
  -1   5 -12    6.52    0.21
   1  -5  12    6.99    0.22
   0   5 -13    1.30    0.08
   0  -5  13    1.33    0.06
   0  -5  13    1.39    0.10
   1   5 -14    0.33    0.06
  -1  -5  14    0.54    0.08
  -1  -5  14    0.52    0.04
   2   5 -15   10.69    0.30
  -2  -5  15   11.03    0.31
   3   5 -16    0.21    0.04
  -3  -5  16    0.15    0.06
  -4  -5  17    0.05    0.06
   5   5 -18   10.25    0.31
  -5  -5  18   10.25    0.32
  -6  -5  19    0.41    0.08
   7   5 -20    4.91    0.19
  -7  -5  20    4.24    0.23
   8   5 -21    0.05    0.06
  -8  -5  21   -0.05    0.08
   9   5 -22    4.33    0.19
  -9  -5  22    4.48    0.21
 -13   6  -1    4.99    0.21
  13  -6   1    5.50    0.24
 -12   6  -2    2.09    0.14
  12  -6   2    1.99    0.16
 -11   6  -3    1.83    0.13
  11  -6   3    2.11    0.16
 -10   6  -4    6.99    0.24
  10  -6   4    6.96    0.26
  -9   6  -5    1.23    0.11
   9  -6   5    1.23    0.13
  -8   6  -6    0.87    0.10
   8  -6   6    0.88    0.12
  -7   6  -7    3.84    0.16
   7  -6   7    3.91    0.17
  -6   6  -8    0.76    0.09
  -6   6  -8    0.80    0.09
   6  -6   8    0.84    0.10
  -5   6  -9   16.07    0.43
  -5   6  -9   15.74    0.43
   5  -6   9   15.91    0.43
  -4   6 -10    0.05    0.05
  -4   6 -10    0.05    0.04
   4  -6  10    0.04    0.06
  -3   6 -11    0.00    0.04
   3  -6  11   -0.04    0.05
  -2   6 -12    0.77    0.07
   2  -6  12    0.98    0.09
  -1   6 -13    0.37    0.05
   1  -6  13    0.43    0.08
   0   6 -14    7.49    0.22
   0  -6  14    7.47    0.23
   0  -6  14    7.08    0.20
   1   6 -15    2.46    0.10
  -1  -6  15    2.43    0.08
  -1  -6  15    2.30    0.12
   2   6 -16    1.34    0.08
  -2  -6  16    1.21    0.04
  -2  -6  16    1.34    0.11
   3   6 -17    1.54    0.08
  -3  -6  17    1.44    0.11
   4   6 -18    1.08    0.08
  -4  -6  18    0.99    0.13
   5   6 -19    1.26    0.09
  -5  -6  19    1.45    0.14
  -6  -6  20    2.32    0.15
   7   6 -21    1.36    0.12
  -7  -6  21    1.15    0.14
   8   6 -22    1.36    0.13
  -8  -6  22    1.55    0.14
 -12   7  -3    1.96    0.14
  12  -7   3    1.71    0.16
 -11   7  -4    1.35    0.12
  11  -7   4    1.38    0.14
 -10   7  -5    0.06    0.06
  10  -7   5   -0.10    0.08
  -9   7  -6    0.99    0.10
  -8   7  -7    1.35    0.13
   8  -7   7    1.43    0.14
  -7   7  -8    0.42    0.09
   7  -7   8    0.42    0.08
  -6   7  -9    3.27    0.15
  -6   7  -9    3.33    0.14
   6  -7   9    3.43    0.16
  -5   7 -10    2.67    0.14
  -5   7 -10    2.52    0.12
   5  -7  10    2.33    0.14
  -4   7 -11    1.22    0.08
  -4   7 -11    1.27    0.10
   4  -7  11    1.19    0.11
  -3   7 -12    0.82    0.07
   3  -7  12    0.83    0.10
  -2   7 -13    0.26    0.06
   2  -7  13    0.40    0.09
  -1   7 -14    0.00    0.04
   1  -7  14    0.10    0.05
   1  -7  14    0.06    0.06
   0   7 -15   10.97    0.30
   0  -7  15   10.96    0.32
   0  -7  15   10.66    0.29
   1   7 -16    4.36    0.15
  -1  -7  16    4.32    0.17
  -1  -7  16    4.16    0.12
   2   7 -17    1.20    0.08
  -2  -7  17    1.26    0.12
  -2  -7  17    1.14    0.05
   3   7 -18    1.31    0.09
  -3  -7  18    1.24    0.11
   4   7 -19   26.33    0.68
  -4  -7  19   26.20    0.70
   5   7 -20    0.32    0.05
  -5  -7  20    0.60    0.12
   6   7 -21   16.34    0.45
   7   7 -22    0.29    0.05
  -7  -7  22    0.39    0.09
  -8  -7  23    5.14    0.23
 -12   8  -4    1.30    0.13
  12  -8   4    1.54    0.16
 -11   8  -5    0.06    0.06
  11  -8   5    0.10    0.09
 -10   8  -6    2.90    0.15
  10  -8   6    2.87    0.17
  -9   8  -7    3.58    0.16
   9  -8   7    3.41    0.18
  -8   8  -8    0.37    0.07
   8  -8   8    0.42    0.08
  -7   8  -9    1.68    0.11
   7  -8   9    1.92    0.14
  -6   8 -10   22.27    0.59
  -6   8 -10   22.22    0.58
   6  -8  10   21.26    0.59
  -5   8 -11    1.04    0.09
  -5   8 -11    1.06    0.12
   5  -8  11    1.02    0.13
  -4   8 -12   25.06    0.64
  -4   8 -12   24.21    0.65
   4  -8  12   24.32    0.65
  -3   8 -13    1.67    0.09
   3  -8  13    1.58    0.12
  -2   8 -14    1.47    0.09
   2  -8  14    1.58    0.11
  -1   8 -15   14.07    0.37
   1  -8  15   13.05    0.36
   1  -8  15   13.98    0.39
   0   8 -16   13.22    0.36
   0  -8  16   13.42    0.38
   0  -8  16   13.31    0.35
   1   8 -17    3.09    0.12
  -1  -8  17    2.90    0.10
  -1  -8  17    3.04    0.15
   2   8 -18    0.89    0.08
  -2  -8  18    0.70    0.12
   3   8 -19    6.61    0.21
  -3  -8  19    6.77    0.23
   4   8 -20    3.73    0.15
  -4  -8  20    3.75    0.18
   5   8 -21    5.39    0.18
  -5  -8  21    5.16    0.21
   6   8 -22    1.29    0.09
  -6  -8  22    1.32    0.14
   7   8 -23    0.29    0.06
  -7  -8  23    0.11    0.08
 -11   9  -6    2.60    0.15
  11  -9   6    2.63    0.18
 -10   9  -7    0.15    0.07
  10  -9   7    0.13    0.09
  -9   9  -8    4.10    0.17
   9  -9   8    4.23    0.20
  -8   9  -9   12.44    0.36
  -7   9 -10    8.64    0.27
   7  -9  10    8.69    0.29
  -6   9 -11    7.50    0.24
   6  -9  11    7.71    0.26
  -5   9 -12    2.10    0.11
  -5   9 -12    1.90    0.16
   5  -9  12    1.99    0.14
  -4   9 -13    0.57    0.07
  -4   9 -13    0.53    0.11
   4  -9  13    0.47    0.08
  -3   9 -14    3.64    0.14
   3  -9  14    3.50    0.16
  -2   9 -15    0.96    0.08
   2  -9  15    1.01    0.09
   2  -9  15    0.70    0.11
  -1   9 -16    6.79    0.20
   1  -9  16    6.30    0.22
   1  -9  16    6.53    0.20
   0   9 -17   21.45    0.56
   0  -9  17   21.11    0.56
   0  -9  17   21.71    0.58
   1   9 -18    6.85    0.21
  -1  -9  18    6.63    0.24
   2   9 -19    1.92    0.10
  -2  -9  19    2.06    0.14
   3   9 -20    3.18    0.12
  -3  -9  20    3.28    0.16
   4   9 -21    2.92    0.12
  -4  -9  21    2.98    0.16
   5   9 -22    5.83    0.19
  -5  -9  22    5.84    0.23
   6   9 -23    0.51    0.09
  -6  -9  23    0.46    0.09
 -10  10  -8    0.18    0.07
  10 -10   8    0.11    0.09
  -9  10  -9    2.09    0.12
   9 -10   9    1.96    0.16
  -8  10 -10    3.14    0.14
   8 -10  10    3.24    0.18
  -7  10 -11    7.39    0.24
  -6  10 -12    1.49    0.10
  -6  10 -12    1.44    0.13
   6 -10  12    1.57    0.14
  -5  10 -13    0.26    0.08
  -5  10 -13    0.13    0.05
   5 -10  13    0.08    0.07
  -4  10 -14   19.48    0.54
  -4  10 -14   19.53    0.52
   4 -10  14   19.96    0.54
  -3  10 -15    0.35    0.06
   3 -10  15    0.46    0.08
  -2  10 -16    0.91    0.08
   2 -10  16    0.88    0.11
   2 -10  16    0.97    0.09
  -1  10 -17    0.29    0.06
   1 -10  17    0.16    0.07
   1 -10  17    0.34    0.07
   0  10 -18    0.72    0.07
   0 -10  18    0.62    0.11
   1  10 -19    0.25    0.04
  -1 -10  19    0.47    0.08
   2  10 -20    0.73    0.07
  -2 -10  20    0.86    0.11
   3  10 -21    3.19    0.14
  -3 -10  21    3.67    0.16
   4  10 -22    1.70    0.09
  -4 -10  22    1.38    0.16
  -9  11 -10    2.47    0.13
   9 -11  10    2.63    0.17
  -8  11 -11   -0.06    0.06
   8 -11  11   -0.03    0.08
  -7  11 -12    1.83    0.11
   7 -11  12    1.78    0.15
  -6  11 -13    3.35    0.14
  -6  11 -13    3.31    0.17
  -5  11 -14    3.40    0.17
  -5  11 -14    3.06    0.13
   5 -11  14    3.24    0.17
  -4  11 -15    0.38    0.08
   4 -11  15    0.20    0.08
   4 -11  15    0.51    0.10
  -3  11 -16    4.41    0.19
  -3  11 -16    4.56    0.15
   3 -11  16    4.46    0.17
   3 -11  16    4.34    0.18
  -2  11 -17    0.47    0.07
   2 -11  17    0.56    0.10
   2 -11  17    0.35    0.06
  -1  11 -18   10.28    0.28
   1 -11  18    9.43    0.31
   0  11 -19    0.52    0.06
   0 -11  19    0.45    0.08
   1  11 -20    1.59    0.08
  -1 -11  20    1.47    0.14
  -8  12 -12    0.16    0.06
   8 -12  12    0.16    0.08
  -7  12 -13    0.06    0.06
   7 -12  13    0.18    0.08
  -6  12 -14    4.61    0.16
  -6  12 -14    4.25    0.20
   6 -12  14    4.35    0.20
  -5  12 -15    1.74    0.14
  -5  12 -15    1.50    0.10
   5 -12  15    1.58    0.14
  -4  12 -16    6.51    0.20
  -4  12 -16    6.42    0.24
   4 -12  16    6.65    0.24
   4 -12  16    6.83    0.25
  -3  12 -17    3.11    0.17
   3 -12  17    2.74    0.14
   3 -12  17    2.95    0.17
  -2  12 -18    2.86    0.13
   2 -12  18    3.04    0.23
  -6  13 -15    2.27    0.14
   6 -13  15    2.28    0.15
  -5  13 -16    0.37    0.09
   5 -13  16    0.35    0.08
  -4  13 -17    0.27    0.11
  -3  13 -18   -0.03    0.09
  -2  13 -19    1.92    0.15
  -3 -16   9    8.11    0.26
   3  16  -9    7.98    0.26
  -2 -16   8    0.56    0.11
   2  16  -8    0.64    0.10
  -1 -16   7    3.55    0.17
   0 -16   6    2.03    0.14
   1 -16   5    0.39    0.08
   2 -16   4    1.23    0.13
   3 -16   3    0.20    0.08
   4 -16   2    0.18    0.09
   5 -16   1    0.10    0.09
   5  15 -10    1.57    0.12
  -4 -15   9    0.07    0.06
   4  15  -9   -0.08    0.06
  -3 -15   8    1.12    0.11
   3  15  -8    1.10    0.11
  -2 -15   7    1.39    0.12
   2  15  -7    1.21    0.11
  -1 -15   6    7.61    0.26
   1  15  -6    8.02    0.26
   0 -15   5    1.49    0.13
   1 -15   4    3.29    0.16
   2 -15   3    0.66    0.12
   3 -15   2    1.80    0.14
   4 -15   1    0.14    0.08
   5 -15   0    1.60    0.15
   6 -15  -1    0.04    0.09
  -5 -14   9    1.48    0.10
   5  14  -9    1.26    0.10
  -4 -14   8    0.25    0.07
   4  14  -8    0.05    0.06
  -3 -14   7    1.25    0.11
   3  14  -7    1.24    0.11
  -2 -14   6    4.37    0.18
   2  14  -6    4.21    0.20
  -1 -14   5    0.63    0.12
   1  14  -5    0.77    0.10
   1 -14   3    0.14    0.08
   2 -14   2    0.71    0.12
   3 -14   1    4.73    0.20
   4 -14   0    1.27    0.14
   5 -14  -1    9.10    0.31
   6 -14  -2    0.07    0.09
   7 -14  -3    0.18    0.09
   8 -14  -4    0.63    0.12
  -6 -13   9    0.46    0.09
  -5 -13   8    2.05    0.12
   5  13  -8    1.63    0.10
  -4 -13   7    8.12    0.26
   4  13  -7    7.97    0.25
  -3 -13   6   12.53    0.36
   3  13  -6   12.83    0.36
  -2 -13   5   14.72    0.41
   2  13  -5   14.37    0.40
  -1 -13   4    6.97    0.24
   1  13  -4    6.94    0.23
   0 -13   3    5.93    0.21
   1 -13   2    2.26    0.13
   2 -13   1    0.15    0.09
   3 -13   0    1.18    0.13
   4 -13  -1    1.41    0.13
   5 -13  -2    2.86    0.17
   6 -13  -3   10.10    0.33
   7 -13  -4    5.14    0.22
   8 -13  -5    2.02    0.16
  -6 -12   8    0.26    0.06
  -5 -12   7    0.09    0.06
  -4 -12   6   14.57    0.41
   4  12  -6   14.76    0.40
  -3 -12   5    2.20    0.12
   3  12  -5    2.01    0.11
  -2 -12   4   10.95    0.32
   2  12  -4   10.73    0.31
  -1 -12   3    3.98    0.17
   1  12  -3    3.84    0.15
   0 -12   2    5.28    0.20
   1 -12   1    0.12    0.07
   2 -12   0    0.47    0.10
   3 -12  -1    4.37    0.18
   3 -12  -1    4.42    0.17
   5 -12  -3   26.85    0.69
   5 -12  -3   26.08    0.71
   6 -12  -4    1.43    0.11
   6 -12  -4    1.44    0.14
  -6  12   4    1.25    0.07
   7 -12  -5    6.12    0.23
   7 -12  -5    6.04    0.22
  -7  12   5    6.17    0.18
   8 -12  -6    0.75    0.12
   8 -12  -6    0.66    0.13
  -8  12   6    0.59    0.09
   9 -12  -7    0.22    0.10
   9 -12  -7    0.38    0.09
  -9  12   7    0.35    0.06
  -5 -11   6    5.24    0.18
  -4 -11   5    2.93    0.13
   4  11  -5    2.96    0.12
  -3 -11   4    2.87    0.13
   3  11  -4    2.92    0.12
  -2 -11   3    1.81    0.11
   2  11  -3    1.66    0.10
  -1 -11   2    1.04    0.10
   1  11  -2    1.02    0.09
   0 -11   1    0.56    0.05
   0 -11   1    0.54    0.10
   1 -11   0    0.02    0.06
   1 -11   0    0.00    0.03
   2 -11  -1    2.38    0.13
   2 -11  -1    2.19    0.09
   3 -11  -2   15.40    0.43
   3 -11  -2   15.29    0.40
   4 -11  -3    1.72    0.12
   5 -11  -4    8.37    0.28
   5 -11  -4    8.74    0.26
  -5  11   4    8.54    0.23
   6 -11  -5    0.29    0.08
   6 -11  -5    0.24    0.06
  -6  11   5    0.16    0.04
   7 -11  -6    0.84    0.11
   7 -11  -6    0.94    0.13
  -7  11   6    0.87    0.08
   8 -11  -7    1.24    0.14
   8 -11  -7    1.20    0.12
  -8  11   7    1.29    0.09
   9 -11  -8    1.73    0.14
   9 -11  -8    1.90    0.15
  -9  11   8    2.13    0.12
  10 -11  -9    0.52    0.10
  10 -11  -9    0.74    0.13
 -10  11   9    0.71    0.10
  -5 -10   5   15.11    0.40
  -5 -10   5   14.51    0.39
  -4 -10   4    2.41    0.12
  -4 -10   4    2.46    0.09
  -3 -10   3    1.46    0.10
   3  10  -3    1.39    0.08
  -2 -10   2   12.12    0.32
  -2 -10   2   13.39    0.36
  -2 -10   2   13.13    0.33
   2  10  -2   13.28    0.35
  -1 -10   1    0.79    0.05
  -1 -10   1    0.80    0.09
  -1 -10   1    0.75    0.04
   1  10  -1    0.68    0.07
   0 -10   0   10.91    0.31
   0 -10   0   10.53    0.27
   1 -10  -1    0.54    0.09
   1 -10  -1    0.79    0.06
   2 -10  -2   12.75    0.34
   2 -10  -2   12.81    0.36
   3 -10  -3    1.39    0.08
   3 -10  -3    1.40    0.12
   4 -10  -4    2.41    0.13
   4 -10  -4    2.60    0.14
  -4  10   4    2.62    0.09
   5 -10  -5   14.94    0.40
   5 -10  -5   14.62    0.42
  -5  10   5   14.59    0.38
   6 -10  -6   11.88    0.36
   6 -10  -6   11.68    0.34
  -6  10   6   11.88    0.32
   7 -10  -7    0.63    0.11
   7 -10  -7    0.62    0.11
  -7  10   7    0.57    0.08
   8 -10  -8    2.15    0.15
   8 -10  -8    2.21    0.15
  -8  10   8    1.89    0.11
   9 -10  -9    0.35    0.08
   9 -10  -9    0.33    0.08
  -9  10   9    0.26    0.06
  10 -10 -10    0.36    0.09
  10 -10 -10    0.67    0.14
 -10  10  10    0.63    0.11
  -7  -9   6    0.09    0.05
  -6  -9   5    0.31    0.05
  -5  -9   4    0.67    0.06
  -5  -9   4    0.76    0.08
  -4  -9   3    3.80    0.14
  -4  -9   3    3.63    0.11
  -3  -9   2    0.41    0.04
  -3  -9   2    0.49    0.08
   3   9  -2    0.41    0.06
  -2  -9   1    7.26    0.22
   2   9  -1    6.95    0.21
  -1  -9   0    0.78    0.08
   0  -9  -1    3.40    0.13
   0  -9  -1    3.38    0.10
   1  -9  -2    2.06    0.11
   1  -9  -2    2.09    0.08
   1  -9  -2    2.03    0.07
   2  -9  -3   14.59    0.37
   2  -9  -3   14.06    0.39
   3  -9  -4    8.17    0.24
   3  -9  -4    7.59    0.22
  -3   9   4    7.71    0.20
  -3   9   4    7.78    0.20
   4  -9  -5    1.41    0.11
   4  -9  -5    1.25    0.10
  -4   9   5    1.39    0.07
  -4   9   5    1.41    0.07
   5  -9  -6   15.77    0.42
   5  -9  -6   15.66    0.44
  -5   9   6   16.08    0.41
  -5   9   6   14.88    0.43
   6  -9  -7    1.29    0.13
   6  -9  -7    1.41    0.12
  -6   9   7    1.32    0.09
   7  -9  -8    2.15    0.13
   7  -9  -8    2.39    0.15
  -7   9   8    2.24    0.12
   8  -9  -9    0.18    0.08
   8  -9  -9   -0.01    0.07
  -8   9   9    0.15    0.06
   9  -9 -10    0.17    0.08
   9  -9 -10    0.04    0.09
  -9   9  10    0.21    0.07
  10  -9 -11    0.67    0.14
  10  -9 -11    0.38    0.10
 -10   9  11    0.44    0.08
  -9  -8   7   13.00    0.37
   9   8  -7   12.78    0.34
  -8  -8   6    5.01    0.17
   8   8  -6    4.95    0.14
  -7  -8   5   12.16    0.34
  -6  -8   4    1.47    0.08
  -5  -8   3    0.59    0.08
  -5  -8   3    0.54    0.05
  -4  -8   2   12.84    0.33
  -4  -8   2   11.68    0.31
  -4  -8   2   12.34    0.31
  -3  -8   1    0.56    0.07
  -3  -8   1    0.52    0.04
   3   8  -1    0.57    0.06
  -2  -8   0    1.40    0.09
   2   8   0    1.38    0.10
  -1  -8  -1    0.25    0.05
   0  -8  -2    0.38    0.07
   0  -8  -2    0.46    0.04
   1  -8  -3   13.27    0.37
   1  -8  -3   13.64    0.34
   1  -8  -3   13.85    0.34
   2  -8  -4    3.38    0.13
   2  -8  -4    3.44    0.11
   3  -8  -5    0.67    0.07
   3  -8  -5    0.76    0.09
  -3   8   5    0.77    0.06
  -3   8   5    0.66    0.05
   4  -8  -6   18.36    0.49
   4  -8  -6   18.60    0.49
  -4   8   6   18.56    0.47
  -4   8   6   18.20    0.47
   5  -8  -7    3.94    0.15
   5  -8  -7    4.10    0.17
  -5   8   7    3.58    0.13
  -5   8   7    3.93    0.14
   6  -8  -8    3.10    0.15
   6  -8  -8    3.18    0.16
  -6   8   8    2.96    0.13
   7  -8  -9    2.62    0.14
   7  -8  -9    2.61    0.15
  -7   8   9    2.69    0.13
   8  -8 -10    0.86    0.12
   8  -8 -10    0.86    0.12
  -8   8  10    0.82    0.12
   9  -8 -11    0.35    0.09
  -9   8  11    0.29    0.07
  10  -8 -12    1.50    0.14
 -10   8  12    1.41    0.13
  11  -8 -13    0.13    0.09
 -11   8  13    0.25    0.08
 -11  -7   8    0.03    0.07
 -10  -7   7    8.91    0.27
  10   7  -7    8.94    0.25
  -9  -7   6    0.22    0.05
   9   7  -6    0.20    0.04
  -8  -7   5    1.12    0.09
   8   7  -5    1.11    0.06
  -7  -7   4   10.24    0.30
   7   7  -4   10.47    0.27
  -6  -7   3    0.40    0.06
   6   7  -3    0.39    0.02
  -5  -7   2    7.45    0.22
  -5  -7   2    7.57    0.21
  -4  -7   1    8.16    0.21
  -4  -7   1    7.63    0.21
  -4  -7   1    8.42    0.23
  -3  -7   0    0.71    0.08
  -3  -7   0    0.70    0.04
   3   7   0    0.66    0.06
  -2  -7  -1    1.86    0.10
   2   7   1    1.82    0.08
  -1  -7  -2    1.89    0.11
   0  -7  -3   40.08    0.97
   0  -7  -3   40.08    1.00
   1  -7  -4   13.63    0.34
   1  -7  -4   13.75    0.35
   1  -7  -4   13.36    0.37
   2  -7  -5    1.09    0.07
   2  -7  -5    1.07    0.10
  -2   7   5    1.17    0.06
   3  -7  -6   30.86    0.78
   3  -7  -6   31.12    0.77
  -3   7   6   29.75    0.76
   4  -7  -7    0.72    0.09
   4  -7  -7    0.54    0.11
  -4   7   7    0.57    0.07
  -4   7   7    0.58    0.07
   5  -7  -8   17.66    0.47
   5  -7  -8   18.02    0.47
  -5   7   8   16.21    0.45
  -5   7   8   18.00    0.46
   6  -7  -9    1.71    0.12
   6  -7  -9    1.50    0.11
  -6   7   9    1.53    0.10
   7  -7 -10    0.80    0.11
  -7   7  10    0.74    0.09
   8  -7 -11   10.26    0.32
   9  -7 -12    0.45    0.09
  -9   7  12    0.62    0.11
  10  -7 -13    0.15    0.08
 -10   7  13    0.21    0.08
  11  -7 -14    0.03    0.09
 -11   7  14    0.10    0.08
 -12  -6   8    0.07    0.08
  12   6  -8    0.10    0.05
 -11  -6   7    3.40    0.16
 -10  -6   6    0.76    0.10
  10   6  -6    0.63    0.08
  -9  -6   5    1.61    0.11
   9   6  -5    1.39    0.09
  -8  -6   4    5.66    0.19
   8   6  -4    5.74    0.17
  -7  -6   3   10.98    0.31
   7   6  -3   10.99    0.29
   7   6  -3   11.86    0.30
  -6  -6   2   16.66    0.44
   6   6  -2   17.10    0.43
   6   6  -2   17.37    0.43
  -5  -6   1    2.83    0.10
  -4  -6   0    5.91    0.16
  -4  -6   0    5.58    0.16
  -4  -6   0    5.94    0.18
  -3  -6  -1   19.90    0.52
  -3  -6  -1   20.73    0.50
   3   6   1   20.60    0.51
  -1  -6  -3    4.68    0.14
  -1  -6  -3    4.29    0.16
   0  -6  -4   69.24    1.61
   0  -6  -4   68.37    1.63
   0  -6  -4   62.03    1.64
   1  -6  -5    1.38    0.07
   1  -6  -5    1.42    0.07
   1  -6  -5    1.37    0.11
  -1   6   5    1.43    0.05
  -1   6   5    1.40    0.05
   2  -6  -6    0.62    0.08
   2  -6  -6    0.65    0.10
  -2   6   6    0.70    0.06
  -2   6   6    0.60    0.06
   3  -6  -7  131.90    3.20
   3  -6  -7  133.56    3.21
  -3   6   7  130.12    3.20
  -3   6   7  130.44    3.19
   4  -6  -8   58.14    1.44
  -4   6   8   57.21    1.43
  -4   6   8   58.41    1.43
   5  -6  -9    4.47    0.16
   5  -6  -9    4.20    0.16
  -5   6   9    4.53    0.16
   6  -6 -10   32.61    0.82
   6  -6 -10   31.84    0.82
  -6   6  10   31.40    0.82
   7  -6 -11    7.24    0.24
  -7   6  11    7.01    0.23
   8  -6 -12    2.46    0.15
   9  -6 -13    1.67    0.15
  -9   6  13    1.73    0.14
  10  -6 -14    0.33    0.09
 -10   6  14    0.38    0.08
  11  -6 -15    0.07    0.08
 -11   6  15    0.11    0.09
 -13  -5   8    0.52    0.12
  13   5  -8    0.50    0.08
 -12  -5   7    6.69    0.24
  12   5  -7    6.75    0.23
 -11  -5   6    1.89    0.13
  11   5  -6    1.78    0.11
 -10  -5   5   12.43    0.36
  10   5  -5   11.84    0.34
  -9  -5   4    0.84    0.09
   9   5  -4    0.96    0.09
  -8  -5   3    0.06    0.05
   8   5  -3    0.09    0.04
   8   5  -3    0.11    0.03
  -7  -5   2    0.28    0.07
   7   5  -2    0.23    0.05
   7   5  -2    0.23    0.03
  -6  -5   1   16.86    0.44
   6   5  -1   17.19    0.43
  -5  -5   0    1.07    0.07
   5   5   0    1.04    0.05
   5   5   0    0.99    0.06
  -4  -5  -1    9.65    0.29
  -4  -5  -1    9.87    0.26
  -4  -5  -1   10.16    0.26
  -3  -5  -2   11.09    0.29
  -3  -5  -2   11.41    0.29
  -3  -5  -2   11.52    0.31
  -2  -5  -3  367.29    8.93
  -2  -5  -3  363.29    8.84
  -1  -5  -4    1.32    0.05
  -1  -5  -4    1.27    0.08
  -1  -5  -4    1.31    0.06
   0  -5  -5   58.59    1.43
   0  -5  -5   59.03    1.44
   0  -5  -5   59.52    1.45
   1  -5  -6    0.16    0.04
   1  -5  -6    0.16    0.05
   1  -5  -6    0.16    0.04
  -1   5   6    0.14    0.03
  -1   5   6    0.11    0.03
   2  -5  -7    3.49    0.14
   2  -5  -7    3.31    0.13
   2  -5  -7    3.44    0.12
  -2   5   7    3.53    0.12
  -2   5   7    3.55    0.12
   3  -5  -8   59.62    1.48
   3  -5  -8   58.68    1.50
  -3   5   8   59.53    1.48
  -3   5   8   62.98    1.48
   4  -5  -9    8.22    0.24
   4  -5  -9    8.39    0.24
  -4   5   9    8.16    0.24
  -4   5   9    7.46    0.23
   5  -5 -10    1.39    0.09
   5  -5 -10    1.57    0.10
  -5   5  10    1.46    0.10
   6  -5 -11    2.24    0.13
  -6   5  11    2.41    0.12
   7  -5 -12   35.82    0.92
  -7   5  12   35.56    0.92
   8  -5 -13    1.31    0.14
   9  -5 -14    4.11    0.19
  -9   5  14    3.88    0.18
  10  -5 -15    0.89    0.13
 -10   5  15    0.71    0.11
  11  -5 -16    0.37    0.09
 -11   5  16    0.41    0.08
 -13  -4   7    5.91    0.24
  13   4  -7    5.47    0.21
 -12  -4   6    0.94    0.12
  12   4  -6    1.42    0.11
 -11  -4   5    1.41    0.12
  11   4  -5    1.22    0.12
 -10  -4   4    1.43    0.12
  10   4  -4    1.56    0.11
  -9  -4   3    0.51    0.08
   9   4  -3    0.72    0.09
  -8  -4   2    0.33    0.07
   8   4  -2    0.47    0.07
   8   4  -2    0.31    0.05
  -7  -4   1    7.47    0.25
   7   4  -1    7.33    0.21
   7   4  -1    7.69    0.21
  -6  -4   0    5.46    0.17
   6   4   0    5.25    0.16
   6   4   0    5.48    0.16
  -5  -4  -1   15.20    0.40
   5   4   1   15.77    0.39
   5   4   1   15.38    0.39
  -4  -4  -2   11.80    0.30
  -4  -4  -2   11.41    0.30
   4   4   2   11.56    0.29
   4   4   2   12.07    0.30
   4   4   2   11.82    0.30
  -3  -4  -3  151.37    4.10
  -3  -4  -3  173.70    4.16
   3   4   3  165.99    4.08
   3   4   3  182.77    4.09
  -2  -4  -4    0.70    0.04
  -2  -4  -4    0.63    0.04
  -2  -4  -4    0.68    0.04
  -2  -4  -4    0.62    0.06
   2   4   4    0.64    0.05
  -1  -4  -5   65.07    1.57
  -1  -4  -5   65.08    1.57
  -1  -4  -5   64.50    1.58
   1   4   5   64.64    1.58
   0  -4  -6   11.85    0.31
   0  -4  -6   11.90    0.30
   0  -4  -6   12.05    0.30
   0   4   6   11.43    0.30
   0   4   6   11.44    0.31
   0   4   6   11.88    0.30
   1  -4  -7   31.77    0.78
   1  -4  -7   31.33    0.78
   1  -4  -7   31.07    0.79
  -1   4   7   31.38    0.79
  -1   4   7   32.00    0.78
  -1   4   7   32.93    0.78
   2  -4  -8   80.09    2.01
   2  -4  -8   82.87    2.01
   2  -4  -8   82.56    2.02
  -2   4   8   84.35    2.01
  -2   4   8   82.07    2.01
   3  -4  -9    4.30    0.15
   3  -4  -9    4.27    0.15
  -3   4   9    4.04    0.14
  -3   4   9    4.33    0.15
   4  -4 -10   22.28    0.66
   4  -4 -10   24.31    0.61
  -4   4  10   24.57    0.61
   5  -4 -11   30.53    0.79
   5  -4 -11   30.91    0.78
  -5   4  11   31.20    0.79
   6  -4 -12    0.67    0.10
  -6   4  12    0.67    0.10
   7  -4 -13    8.93    0.28
  -7   4  13    8.85    0.28
   8  -4 -14    0.26    0.08
   9  -4 -15    5.79    0.23
  -9   4  15    5.57    0.22
  10  -4 -16    2.12    0.16
 -10   4  16    2.18    0.15
  11  -4 -17   11.34    0.36
 -11   4  17   10.76    0.36
 -13  -3   6    1.64    0.14
  13   3  -6    1.74    0.13
 -12  -3   5    3.18    0.17
  12   3  -5    3.25    0.16
 -11  -3   4    3.38    0.16
  11   3  -4    3.55    0.16
 -10  -3   3   -0.08    0.05
  10   3  -3   -0.04    0.06
  -9  -3   2    3.76    0.15
   9   3  -2    3.79    0.15
  -8  -3   1    7.65    0.23
   8   3  -1    7.56    0.23
  -7  -3   0    0.28    0.06
   7   3   0    0.32    0.06
   7   3   0    0.41    0.07
  -6  -3  -1    7.58    0.22
   6   3   1    7.23    0.21
   6   3   1    7.53    0.21
  -5  -3  -2    6.01    0.18
   5   3   2    5.95    0.17
   5   3   2    6.10    0.18
  -4  -3  -3   34.51    0.90
  -4  -3  -3   37.17    0.90
   4   3   3   36.99    0.90
   4   3   3   37.47    0.90
  -3  -3  -4    3.37    0.10
  -3  -3  -4    3.35    0.10
   3   3   4    3.42    0.10
   3   3   4    3.46    0.10
   3   3   4    3.08    0.11
  -2  -3  -5    6.68    0.18
  -2  -3  -5    6.76    0.18
  -2  -3  -5    6.59    0.18
   2   3   5    6.62    0.17
   2   3   5    6.41    0.18
   2   3   5    6.64    0.17
  -1  -3  -6   61.05    1.56
  -1  -3  -6   63.86    1.56
  -1  -3  -6   64.46    1.56
   1   3   6   66.82    1.56
   1   3   6   63.53    1.56
   1   3   6   65.01    1.56
   0  -3  -7    2.22    0.08
   0  -3  -7    2.23    0.08
   0  -3  -7    2.28    0.08
   0   3   7    2.27    0.08
   0   3   7    2.28    0.08
   0   3   7    2.14    0.08
   1  -3  -8    2.21    0.09
   1  -3  -8    2.02    0.08
   1  -3  -8    1.85    0.09
  -1   3   8    2.05    0.08
  -1   3   8    2.06    0.08
  -1   3   8    2.00    0.09
   2  -3  -9    9.54    0.27
   2  -3  -9    9.66    0.26
  -2   3   9    9.97    0.27
  -2   3   9    9.51    0.26
   3  -3 -10   32.89    0.79
   3  -3 -10   30.15    0.81
  -3   3  10   32.45    0.80
  -3   3  10   31.03    0.79
   4  -3 -11   24.93    0.65
   4  -3 -11   25.48    0.63
  -4   3  11   24.99    0.64
   5  -3 -12    1.24    0.11
   5  -3 -12    1.21    0.09
  -5   3  12    1.26    0.10
   6  -3 -13   33.14    0.86
  -6   3  13   33.85    0.86
   7  -3 -14    5.42    0.21
  -7   3  14    5.35    0.20
   8  -3 -15   30.45    0.80
  -8   3  15   27.64    0.80
   9  -3 -16    4.81    0.21
  -9   3  16    4.84    0.20
  10  -3 -17    0.91    0.13
 -10   3  17    0.93    0.13
  11  -3 -18    1.75    0.16
 -11   3  18    1.81    0.15
 -13  -2   5    0.64    0.12
  13   2  -5    0.68    0.13
 -12  -2   4   17.85    0.50
  12   2  -4   17.05    0.49
 -11  -2   3    0.68    0.10
  11   2  -3    0.79    0.12
 -10  -2   2    2.78    0.14
  10   2  -2    2.94    0.15
  -9  -2   1    3.24    0.14
   9   2  -1    3.06    0.14
  -8  -2   0    0.20    0.05
   8   2   0    0.20    0.06
  -7  -2  -1    1.09    0.09
   7   2   1    1.02    0.08
  -6  -2  -2   13.89    0.37
   6   2   2   13.53    0.36
   6   2   2   13.26    0.36
  -5  -2  -3    1.89    0.10
   5   2   3    1.90    0.09
  -4  -2  -4   22.71    0.55
  -4  -2  -4   21.01    0.55
   4   2   4   21.89    0.55
   4   2   4   22.09    0.55
  -3  -2  -5    4.24    0.13
  -3  -2  -5    4.37    0.13
   3   2   5    4.34    0.13
   3   2   5    4.31    0.13
   3   2   5    4.34    0.13
  -2  -2  -6   14.86    0.38
  -2  -2  -6   14.22    0.37
   2   2   6   14.68    0.37
   2   2   6   15.02    0.37
   2   2   6   14.71    0.37
  -1  -2  -7    9.90    0.26
  -1  -2  -7   10.03    0.26
  -1  -2  -7    9.91    0.26
   1   2   7   10.32    0.26
   1   2   7   10.63    0.26
   1   2   7    9.62    0.26
   0  -2  -8    7.67    0.21
   0  -2  -8    7.49    0.21
   0  -2  -8    7.58    0.20
   0   2   8    7.65    0.21
   0   2   8    7.30    0.20
   0   2   8    7.69    0.20
   1  -2  -9   36.81    0.92
   1  -2  -9   36.56    0.91
   1  -2  -9   36.34    0.92
  -1   2   9   36.84    0.91
  -1   2   9   38.07    0.92
  -1   2   9   37.48    0.91
   2  -2 -10    0.41    0.08
   2  -2 -10    0.53    0.06
  -2   2  10    0.49    0.08
   3  -2 -11    0.41    0.06
   3  -2 -11    0.26    0.06
  -3   2  11    0.27    0.06
   4  -2 -12   20.67    0.53
   4  -2 -12   20.93    0.55
  -4   2  12   21.28    0.55
   5  -2 -13    2.70    0.11
   5  -2 -13    2.77    0.12
  -5   2  13    2.68    0.13
   6  -2 -14   39.14    0.98
  -6   2  14   37.58    0.98
   7  -2 -15    1.09    0.12
  -7   2  15    1.16    0.12
   8  -2 -16    0.47    0.10
  -8   2  16    0.45    0.09
   9  -2 -17   10.78    0.35
  -9   2  17   11.15    0.34
  10  -2 -18    2.99    0.18
 -10   2  18    3.20    0.17
  11  -2 -19    2.77    0.18
 -11   2  19    2.66    0.18
 -13  -1   4    1.96    0.15
  13   1  -4    1.75    0.15
 -12  -1   3   21.30    0.59
  12   1  -3   21.44    0.59
 -11  -1   2    4.76    0.19
  11   1  -2    5.02    0.20
 -10  -1   1    5.45    0.20
  10   1  -1    5.03    0.20
  -9  -1   0    5.04    0.18
   9   1   0    5.07    0.19
  -8  -1  -1    1.71    0.10
   8   1   1    1.60    0.10
  -7  -1  -2    2.16    0.11
   7   1   2    2.24    0.11
   7   1   2    2.23    0.08
  -6  -1  -3   26.42    0.67
   6   1   3   25.68    0.66
   6   1   3   26.52    0.65
   6   1   3   26.51    0.67
  -5  -1  -4   12.71    0.34
   5   1   4   12.30    0.33
   5   1   4   12.50    0.34
  -4  -1  -5    3.82    0.13
  -4  -1  -5    4.03    0.13
   4   1   5    4.11    0.14
   4   1   5    4.01    0.13
  -3  -1  -6    0.84    0.07
  -3  -1  -6    0.89    0.06
   3   1   6    0.94    0.07
   3   1   6    0.92    0.06
  -2  -1  -7    0.50    0.05
  -2  -1  -7    0.41    0.06
   2   1   7    0.43    0.06
   2   1   7    0.45    0.05
   2   1   7    0.39    0.05
  -1  -1  -8   10.72    0.28
   1   1   8   10.61    0.28
   1   1   8   10.56    0.27
   1   1   8   11.11    0.28
   0  -1  -9    1.87    0.06
   0  -1  -9    1.76    0.08
   0  -1  -9    1.93    0.08
   0   1   9    1.94    0.07
   0   1   9    1.84    0.09
   0   1   9    1.91    0.08
   1  -1 -10   18.75    0.46
   1  -1 -10   17.22    0.47
   1  -1 -10   19.09    0.47
  -1   1  10   18.84    0.48
  -1   1  10   18.35    0.47
  -1   1  10   18.98    0.46
   2  -1 -11   34.38    0.85
  -2   1  11   32.92    0.86
  -2   1  11   36.55    0.87
   3  -1 -12    0.16    0.03
   3  -1 -12    0.19    0.06
  -3   1  12    0.12    0.06
   4  -1 -13    1.25    0.09
   4  -1 -13    1.27    0.06
  -4   1  13    1.07    0.10
   5  -1 -14    6.19    0.18
   5  -1 -14    6.39    0.20
  -5   1  14    6.57    0.21
   6  -1 -15    8.85    0.27
  -6   1  15    8.85    0.28
   7  -1 -16   12.85    0.37
  -7   1  16   12.55    0.38
   8  -1 -17    2.42    0.15
  -8   1  17    2.29    0.16
   9  -1 -18    1.64    0.13
  -9   1  18    1.40    0.13
  10  -1 -19   11.88    0.38
 -10   1  19   12.15    0.38
  11  -1 -20    0.53    0.12
 -11   1  20    0.47    0.10
 -14   0   4    0.37    0.09
  14   0  -4    0.31    0.08
 -13   0   3    0.58    0.12
  13   0  -3    0.63    0.14
 -12   0   2    0.40    0.08
  12   0  -2    0.44    0.08
  11   0  -1    0.05    0.07
 -10   0   0    3.90    0.16
  10   0   0    3.68    0.17
  -9   0  -1    0.03    0.06
   9   0   1    0.02    0.06
  -8   0  -2   28.16    0.70
   8   0   2   27.79    0.70
   8   0   2   25.74    0.68
  -7   0  -3    2.86    0.12
   7   0   3    2.75    0.10
   7   0   3    2.80    0.12
  -6   0  -4    6.71    0.21
   6   0   4    6.46    0.20
   5   0   5    0.19    0.06
   5   0   5    0.15    0.04
  -4   0  -6   30.33    0.78
  -4   0  -6   31.79    0.77
   4   0   6   31.60    0.78
   4   0   6   31.40    0.80
  -3   0  -7    5.61    0.16
  -3   0  -7    5.12    0.16
   3   0   7    5.41    0.17
   3   0   7    5.30    0.16
  -2   0  -8    8.29    0.22
  -2   0  -8    8.01    0.22
   2   0   8    8.25    0.22
   2   0   8    7.94    0.22
  -1   0  -9    0.06    0.04
  -1   0  -9    0.03    0.03
   1   0   9    0.05    0.04
   1   0   9   -0.01    0.02
   1   0   9    0.01    0.04
   0   0 -10    9.10    0.24
   0   0 -10    8.43    0.24
   0   0  10    8.57    0.24
   0   0  10    8.95    0.22
   0   0  10    9.04    0.25
   1   0 -11    0.34    0.06
   1   0 -11    0.32    0.06
  -1   0  11    0.44    0.04
  -1   0  11    0.39    0.07
  -1   0  11    0.37    0.07
   2   0 -12   24.91    0.63
   2   0 -12   24.72    0.60
  -2   0  12   24.66    0.63
   3   0 -13    0.10    0.05
   3   0 -13    0.13    0.03
  -3   0  13    0.13    0.06
   4   0 -14   13.77    0.37
   4   0 -14   13.90    0.35
  -4   0  14   13.65    0.38
   5   0 -15    0.21    0.06
   5   0 -15    0.14    0.03
  -5   0  15    0.26    0.07
   6   0 -16   44.13    1.13
   6   0 -16   45.14    1.10
  -6   0  16   44.95    1.14
   7   0 -17    0.19    0.07
  -7   0  17    0.05    0.08
   8   0 -18    3.89    0.18
  -8   0  18    3.90    0.19
   9   0 -19    0.37    0.08
  -9   0  19    0.29    0.08
  10   0 -20    9.88    0.33
 -10   0  20    9.90    0.34
 -14   1   3    2.07    0.17
  14  -1  -3    2.97    0.15
 -13   1   2    5.79    0.23
  13  -1  -2    5.47    0.23
 -12   1   1    9.60    0.31
  12  -1  -1    9.86    0.32
 -11   1   0    2.55    0.14
  11  -1   0    2.28    0.15
 -10   1  -1   43.08    1.10
  10  -1   1   42.86    1.10
  -9   1  -2    0.27    0.06
   9  -1   2    0.27    0.07
  -8   1  -3    4.22    0.16
   8  -1   3    4.06    0.16
  -7   1  -4    1.81    0.10
   7  -1   4    1.76    0.11
  -6   1  -5   37.56    0.96
   6  -1   5   38.71    0.96
  -5   1  -6   37.85    0.93
  -5   1  -6   38.26    0.95
   5  -1   6   37.24    0.95
   4  -1   7  120.50    2.87
   4  -1   7  115.19    2.88
  -3   1  -8   52.39    1.33
  -3   1  -8   56.15    1.34
   3  -1   8   55.58    1.34
   3  -1   8   52.75    1.33
  -2   1  -9    1.44    0.08
  -2   1  -9    1.31    0.08
   2  -1   9    1.20    0.08
   2  -1   9    1.45    0.09
  -1   1 -10   10.63    0.29
  -1   1 -10   11.04    0.29
   1  -1  10   11.23    0.30
   1  -1  10   10.56    0.29
   0   1 -11    0.09    0.06
   0   1 -11    0.07    0.05
   0  -1  11    0.10    0.03
   0  -1  11    0.13    0.06
   0  -1  11    0.09    0.05
   1   1 -12  115.60    2.89
  -1  -1  12  121.90    2.90
   2   1 -13    3.30    0.14
  -2  -1  13    3.52    0.15
   3   1 -14   12.40    0.34
  -3  -1  14   12.10    0.34
   4   1 -15   11.03    0.31
  -4  -1  15   11.17    0.32
   5   1 -16    1.68    0.11
   5   1 -16    1.70    0.06
  -5  -1  16    1.61    0.11
   6   1 -17    4.26    0.12
   6   1 -17    4.27    0.18
  -6  -1  17    4.28    0.19
  -7  -1  18    8.01    0.27
   8   1 -19    0.09    0.07
  -8  -1  19    0.03    0.08
   9   1 -20    1.72    0.14
  -9  -1  20    2.02    0.15
  10   1 -21    1.29    0.14
 -10  -1  21    1.03    0.16
 -13   2   1    9.03    0.31
 -12   2   0   10.79    0.33
  12  -2   0   10.38    0.34
 -11   2  -1    0.09    0.07
  11  -2   1    0.15    0.08
 -10   2  -2   19.64    0.53
  10  -2   2   18.46    0.55
  -9   2  -3    6.94    0.23
   9  -2   3    6.83    0.24
  -8   2  -4   22.85    0.59
   8  -2   4   21.73    0.59
  -7   2  -5    9.46    0.28
   7  -2   5    9.48    0.28
  -6   2  -6   35.14    0.87
   6  -2   6   33.62    0.87
  -5   2  -7    7.21    0.21
  -5   2  -7    7.33    0.22
   5  -2   7    7.48    0.23
  -4   2  -8   71.43    1.78
   4  -2   8   73.41    1.78
  -3   2  -9   77.39    1.91
   3  -2   9   78.33    1.91
  -2   2 -10    0.21    0.06
  -2   2 -10    0.28    0.06
  -1   2 -11   21.18    0.51
  -1   2 -11   18.75    0.52
   1  -2  11   18.95    0.57
   0   2 -12    1.12    0.09
   0  -2  12    1.21    0.11
  -1  -2  13    4.81    0.17
   2   2 -14   12.21    0.34
  -2  -2  14   12.57    0.34
   3   2 -15   11.11    0.31
  -3  -2  15   11.06    0.32
   4   2 -16   26.63    0.68
  -4  -2  16   26.21    0.69
   5   2 -17    4.20    0.17
  -5  -2  17    4.33    0.18
   6   2 -18   22.68    0.60
  -6  -2  18   21.95    0.60
   7   2 -19    8.67    0.28
   8   2 -20    0.39    0.08
  -8  -2  20    0.35    0.08
   9   2 -21    7.00    0.26
  -9  -2  21    7.08    0.27
  10   2 -22    2.34    0.16
 -10  -2  22    2.66    0.18
 -13   3   0    1.86    0.14
  13  -3   0    1.62    0.15
 -12   3  -1    0.10    0.07
  12  -3   1   -0.03    0.08
 -11   3  -2    1.95    0.13
  11  -3   2    2.09    0.15
  -9   3  -4    2.88    0.14
   9  -3   4    2.97    0.16
  -8   3  -5    0.86    0.10
   8  -3   5    0.80    0.11
  -7   3  -6    1.40    0.09
   7  -3   6    1.25    0.11
  -6   3  -7    3.78    0.14
   6  -3   7    3.94    0.15
  -5   3  -8    3.26    0.13
  -5   3  -8    3.25    0.13
   5  -3   8    3.31    0.14
  -4   3  -9    1.05    0.09
   4  -3   9    1.08    0.10
  -3   3 -10   26.66    0.68
   3  -3  10   26.58    0.68
  -2   3 -11   12.82    0.34
   2  -3  11   12.42    0.35
  -1   3 -12    4.94    0.17
   1  -3  12    5.19    0.17
   0   3 -13    3.93    0.14
   0  -3  13    4.09    0.16
   1   3 -14    3.04    0.12
  -1  -3  14    3.17    0.14
  -2  -3  15   13.91    0.38
   3   3 -16    1.32    0.09
  -3  -3  16    1.36    0.11
   4   3 -17    0.01    0.05
  -4  -3  17    0.01    0.06
   5   3 -18   13.48    0.38
  -5  -3  18   12.68    0.38
  -6  -3  19    3.36    0.17
   7   3 -20    2.66    0.16
  -7  -3  20    2.60    0.16
   8   3 -21    0.70    0.11
  -8  -3  21    0.81    0.13
   9   3 -22    0.58    0.13
  -9  -3  22    0.72    0.10
 -13   4  -1    2.03    0.14
  13  -4   1    1.66    0.16
 -12   4  -2    0.15    0.07
  12  -4   2    0.12    0.08
 -11   4  -3    3.87    0.17
  11  -4   3    3.71    0.19
 -10   4  -4    4.05    0.17
  10  -4   4    3.88    0.19
  -9   4  -5   12.95    0.38
   9  -4   5   12.90    0.38
  -8   4  -6   18.93    0.52
   8  -4   6   19.34    0.52
  -7   4  -7   26.31    0.67
   7  -4   7   25.39    0.68
  -6   4  -8   12.66    0.35
  -6   4  -8   12.46    0.34
   6  -4   8   12.46    0.36
  -5   4  -9    6.05    0.19
  -5   4  -9    6.46    0.20
   5  -4   9    6.07    0.20
  -4   4 -10    4.86    0.16
   4  -4  10    4.69    0.17
  -3   4 -11    1.97    0.10
   3  -4  11    1.84    0.11
  -2   4 -12  132.38    3.24
   2  -4  12  133.92    3.25
  -1   4 -13    0.40    0.07
   1  -4  13    0.29    0.06
   0   4 -14   10.84    0.30
   0  -4  14   10.49    0.30
   1   4 -15    1.43    0.08
  -1  -4  15    1.45    0.10
   2   4 -16    5.71    0.18
  -2  -4  16    5.67    0.20
  -3  -4  17    2.24    0.13
   4   4 -18    1.05    0.10
  -4  -4  18    0.88    0.11
   5   4 -19    8.57    0.27
  -5  -4  19    8.50    0.28
   6   4 -20    1.07    0.13
  -6  -4  20    0.94    0.13
   7   4 -21    0.49    0.10
  -7  -4  21    0.41    0.08
   8   4 -22    0.03    0.06
  -8  -4  22   -0.14    0.08
   9   4 -23    1.35    0.13
  -9  -4  23    1.13    0.15
 -13   5  -2    2.55    0.16
  13  -5   2    2.32    0.17
 -12   5  -3    1.72    0.13
  12  -5   3    1.90    0.15
 -11   5  -4    3.98    0.18
  11  -5   4    4.36    0.20
 -10   5  -5   11.29    0.35
  10  -5   5   11.66    0.36
   9  -5   6   17.78    0.50
  -8   5  -7    3.75    0.16
   8  -5   7    3.94    0.18
  -7   5  -8    4.63    0.17
   7  -5   8    4.69    0.19
  -6   5  -9    5.24    0.18
  -6   5  -9    5.16    0.18
   6  -5   9    5.43    0.19
  -5   5 -10    3.56    0.14
  -5   5 -10    3.52    0.14
   5  -5  10    3.49    0.15
  -4   5 -11   11.11    0.31
   4  -5  11   10.76    0.31
  -3   5 -12    2.86    0.12
   3  -5  12    3.07    0.13
  -2   5 -13    0.19    0.04
   2  -5  13    0.14    0.06
  -1   5 -14   34.49    0.87
   1  -5  14   34.63    0.88
   0   5 -15    3.22    0.12
   0  -5  15    3.18    0.14
   0  -5  15    3.19    0.10
   1   5 -16    7.01    0.21
  -1  -5  16    6.88    0.18
  -1  -5  16    7.17    0.23
   2   5 -17    2.83    0.12
  -2  -5  17    2.67    0.14
   3   5 -18    0.12    0.04
  -3  -5  18    0.03    0.07
  -4  -5  19    6.16    0.23
  -5  -5  20   10.53    0.33
   6   5 -21    2.51    0.15
   7   5 -22    1.29    0.12
  -7  -5  22    1.27    0.14
   8   5 -23    1.48    0.14
  -8  -5  23    1.67    0.16
 -13   6  -3    1.89    0.12
  13  -6   3    1.93    0.15
 -12   6  -4    7.15    0.26
  12  -6   4    7.28    0.28
 -11   6  -5    0.81    0.10
  11  -6   5    0.69    0.13
 -10   6  -6    1.26    0.12
  10  -6   6    1.47    0.15
  -9   6  -7    3.10    0.15
  -8   6  -8    6.79    0.23
   8  -6   8    6.80    0.24
  -7   6  -9    5.15    0.19
   7  -6   9    5.10    0.20
  -6   6 -10   20.20    0.54
  -6   6 -10   20.68    0.54
   6  -6  10   19.75    0.55
  -5   6 -11   16.40    0.45
  -5   6 -11   17.11    0.45
   5  -6  11   16.87    0.46
  -4   6 -12    0.50    0.07
   4  -6  12    0.45    0.10
  -3   6 -13    0.40    0.07
   3  -6  13    0.41    0.09
  -2   6 -14    9.65    0.27
   2  -6  14    9.40    0.28
  -1   6 -15   22.16    0.57
   1  -6  15   22.17    0.59
   0   6 -16    8.63    0.25
   0  -6  16    8.42    0.23
   0  -6  16    8.51    0.26
   1   6 -17   10.45    0.30
  -1  -6  17   10.41    0.26
  -1  -6  17   10.47    0.31
   2   6 -18    2.27    0.11
  -2  -6  18    2.27    0.14
   3   6 -19    1.57    0.10
  -3  -6  19    1.60    0.13
   4   6 -20    6.61    0.21
  -4  -6  20    6.37    0.24
   5   6 -21    1.04    0.09
  -5  -6  21    0.78    0.12
  -6  -6  22    3.12    0.18
  -7  -6  23    1.67    0.15
   8   6 -24    1.14    0.15
  -8  -6  24    1.44    0.16
 -12   7  -5    4.69    0.20
  12  -7   5    4.67    0.22
 -11   7  -6    0.64    0.11
  11  -7   6    0.19    0.09
 -10   7  -7    0.84    0.11
  10  -7   7    0.91    0.13
  -9   7  -8    0.18    0.06
   9  -7   8    0.32    0.09
  -8   7  -9   10.79    0.32
   8  -7   9   10.53    0.33
  -7   7 -10    1.01    0.10
   7  -7  10    0.93    0.13
  -6   7 -11   42.98    1.10
  -6   7 -11   43.43    1.10
   6  -7  11   43.94    1.11
  -5   7 -12    1.58    0.10
  -5   7 -12    1.66    0.12
   5  -7  12    1.46    0.13
  -4   7 -13    0.75    0.08
   4  -7  13    0.89    0.11
  -3   7 -14    2.17    0.11
   3  -7  14    1.96    0.13
  -2   7 -15   12.95    0.36
   2  -7  15   12.91    0.37
  -1   7 -16    0.44    0.07
   1  -7  16    0.42    0.07
   1  -7  16    0.26    0.07
   0   7 -17    2.10    0.10
   0  -7  17    1.99    0.08
   0  -7  17    2.13    0.13
   1   7 -18    2.67    0.12
  -1  -7  18    2.57    0.14
  -1  -7  18    2.47    0.09
   2   7 -19    3.10    0.13
  -2  -7  19    2.83    0.15
   3   7 -20    3.94    0.15
  -3  -7  20    4.04    0.18
   4   7 -21   12.96    0.37
  -4  -7  21   13.26    0.39
   5   7 -22    2.80    0.12
  -5  -7  22    2.45    0.20
   6   7 -23   10.76    0.31
  -6  -7  23   10.46    0.34
   7   7 -24    0.68    0.10
  -7  -7  24    0.78    0.14
  12  -8   6    1.81    0.19
 -11   8  -7    2.56    0.15
  11  -8   7    2.18    0.17
 -10   8  -8    2.40    0.14
  10  -8   8    2.53    0.16
  -9   8  -9    0.93    0.11
   9  -8   9    0.71    0.13
  -8   8 -10   10.93    0.33
  -7   8 -11    0.58    0.10
   7  -8  11    0.59    0.12
  -6   8 -12    0.63    0.11
  -6   8 -12    0.45    0.09
   6  -8  12    0.45    0.09
  -5   8 -13    0.69    0.09
  -5   8 -13    0.82    0.12
   5  -8  13    0.79    0.12
  -4   8 -14   15.79    0.43
   4  -8  14   16.25    0.45
  -3   8 -15    2.48    0.12
   3  -8  15    2.51    0.15
  -2   8 -16    5.77    0.19
   2  -8  16    6.03    0.21
  -1   8 -17    1.56    0.10
   1  -8  17    1.94    0.10
   1  -8  17    1.65    0.13
   0   8 -18    2.52    0.11
   0  -8  18    2.46    0.10
   0  -8  18    2.60    0.15
   1   8 -19    0.12    0.04
  -1  -8  19    0.12    0.07
   2   8 -20   11.79    0.33
  -2  -8  20   11.32    0.35
   3   8 -21    2.88    0.12
  -3  -8  21    2.85    0.16
   4   8 -22    1.81    0.10
   5   8 -23    2.58    0.13
  -5  -8  23    2.56    0.17
   6   8 -24    0.26    0.06
  -6  -8  24    0.22    0.08
 -11   9  -8    2.98    0.16
  11  -9   8    2.71    0.19
 -10   9  -9   11.30    0.35
  10  -9   9   11.58    0.38
  -9   9 -10    4.78    0.18
   9  -9  10    4.52    0.21
  -8   9 -11   -0.01    0.06
   8  -9  11    0.08    0.08
  -7   9 -12    3.76    0.16
  -7   9 -12    3.59    0.17
  -6   9 -13   13.01    0.37
  -6   9 -13   12.81    0.38
   6  -9  13   12.92    0.39
  -5   9 -14    0.33    0.09
  -5   9 -14    0.42    0.08
   5  -9  14    0.18    0.08
  -4   9 -15   45.89    1.15
  -4   9 -15   44.85    1.16
   4  -9  15   46.04    1.17
  -3   9 -16    4.45    0.16
   3  -9  16    4.67    0.19
  -2   9 -17    4.24    0.15
   2  -9  17    4.37    0.15
   2  -9  17    3.95    0.18
  -1   9 -18    1.83    0.10
   1  -9  18    1.90    0.09
   1  -9  18    1.90    0.15
   0   9 -19   10.57    0.30
   0  -9  19   10.33    0.33
   1   9 -20    1.26    0.08
  -1  -9  20    1.48    0.12
   2   9 -21    5.32    0.18
  -2  -9  21    5.31    0.22
   3   9 -22    1.03    0.09
   4   9 -23    0.34    0.08
  -4  -9  23    0.12    0.08
   5   9 -24    1.78    0.10
  -5  -9  24    1.68    0.16
 -10  10 -10    1.86    0.14
  10 -10  10    2.32    0.17
  -9  10 -11    4.89    0.19
   9 -10  11    5.12    0.22
  -8  10 -12    0.31    0.06
   8 -10  12    0.31    0.09
  -7  10 -13    0.38    0.09
  -7  10 -13    0.59    0.13
   7 -10  13    0.54    0.09
  -6  10 -14    0.33    0.06
  -6  10 -14    0.34    0.08
  -5  10 -15    0.50    0.09
  -5  10 -15    0.35    0.09
   5 -10  15    0.43    0.08
  -4  10 -16    0.26    0.06
  -4  10 -16    0.28    0.09
   4 -10  16    0.25    0.09
  -3  10 -17    0.92    0.10
   3 -10  17    1.35    0.10
   3 -10  17    1.38    0.14
  -2  10 -18    2.99    0.12
   2 -10  18    2.98    0.16
   2 -10  18    2.82    0.13
  -1  10 -19    0.14    0.05
   1 -10  19    0.10    0.08
   0 -10  20    0.13    0.07
   1  10 -21    0.35    0.07
  -1 -10  21    0.34    0.07
   2  10 -22    0.45    0.08
   3  10 -23    1.41    0.09
  -3 -10  23    1.44    0.15
   4  10 -24    2.46    0.12
  -4 -10  24    2.64    0.18
  -9  11 -12    9.45    0.30
   9 -11  12    9.50    0.34
  -8  11 -13    0.91    0.10
   8 -11  13    1.26    0.14
  -7  11 -14    0.16    0.06
  -7  11 -14    0.10    0.08
   7 -11  14   -0.10    0.09
  -6  11 -15    0.75    0.12
  -6  11 -15    0.62    0.09
   6 -11  15    0.71    0.13
  -5  11 -16    4.04    0.19
  -5  11 -16    3.99    0.15
   5 -11  16    3.50    0.21
  -4  11 -17    0.11    0.05
  -4  11 -17    0.21    0.08
   4 -11  17    0.20    0.08
   4 -11  17    0.20    0.06
  -3  11 -18    1.17    0.08
   3 -11  18    1.25    0.12
   3 -11  18    1.19    0.11
  -2  11 -19    4.83    0.17
   2 -11  19    4.98    0.20
  -1  11 -20    1.76    0.10
   1 -11  20    2.12    0.14
   0  11 -21    0.55    0.08
   1  11 -22    0.02    0.05
  -1 -11  22    0.07    0.10
   2  11 -23   -0.09    0.09
  -7  12 -15    1.49    0.11
   7 -12  15    1.43    0.14
  -6  12 -16    2.13    0.16
  -6  12 -16    2.34    0.12
   6 -12  16    2.05    0.16
  -5  12 -17    0.25    0.06
  -5  12 -17    0.37    0.09
   5 -12  17    0.37    0.09
   5 -12  17    0.41    0.07
  -4  12 -18    0.60    0.08
  -4  12 -18    0.75    0.13
   4 -12  18    0.77    0.13
  -3  12 -19    0.75    0.13
  -3  12 -19    0.75    0.08
   3 -12  19    0.96    0.13
  -2  12 -20   -0.07    0.05
  -3 -16   7    5.52    0.21
   3  16  -7    5.45    0.19
  -2 -16   6    1.84    0.13
  -1 -16   5    9.66    0.31
   0 -16   4    0.15    0.08
   1 -16   3    0.85    0.12
   2 -16   2    0.97    0.13
   3 -16   1    0.32    0.09
   4 -16   0    0.27    0.09
   5 -16  -1    1.15    0.15
  -5 -15   8    0.11    0.06
  -4 -15   7    1.57    0.13
   4  15  -7    1.73    0.11
  -3 -15   6    1.28    0.13
   3  15  -6    1.15    0.10
  -2 -15   5    1.84    0.13
  -1 -15   4    3.06    0.16
   0 -15   3   14.09    0.41
   1 -15   2    0.98    0.13
   2 -15   1    1.33    0.13
   3 -15   0    0.32    0.08
   4 -15  -1    0.26    0.08
   5 -15  -2    0.80    0.14
   6 -15  -3   -0.05    0.09
  -6 -14   8    4.89    0.18
  -5 -14   7    0.01    0.07
   5  14  -7    0.01    0.06
   4  14  -6    1.26    0.09
   3  14  -5    1.70    0.11
   2  14  -4   13.19    0.37
   0 -14   2   11.59    0.35
   1 -14   1    2.89    0.16
   2 -14   0    2.03    0.14
   3 -14  -1    0.00    0.08
   4 -14  -2    2.39    0.15
   5 -14  -3    4.04    0.19
   6 -14  -4    1.42    0.15
   7 -14  -5    0.21    0.09
  -6 -13   7    1.16    0.11
   6  13  -7    1.06    0.09
  -5 -13   6    2.17    0.12
   5  13  -6    2.15    0.10
  -4 -13   5    0.83    0.10
   4  13  -5    0.79    0.08
  -3 -13   4   17.29    0.48
   3  13  -4   17.70    0.47
  -2 -13   3    0.95    0.11
   2  13  -3    0.81    0.10
  -1 -13   2    2.63    0.15
   0 -13   1    8.58    0.28
   1 -13   0   16.33    0.46
   3 -13  -2    4.61    0.19
   4 -13  -3    0.57    0.12
   5 -13  -4    1.34    0.14
   6 -13  -5    3.92    0.20
   7 -13  -6   11.63    0.37
   8 -13  -7    6.52    0.26
  -6 -12   6    4.81    0.18
  -5 -12   5   12.00    0.34
   5  12  -5   11.30    0.32
  -4 -12   4    4.92    0.18
   4  12  -4    4.90    0.17
  -3 -12   3    2.07    0.13
   3  12  -3    2.14    0.11
  -2 -12   2    4.67    0.18
   2  12  -2    4.65    0.17
  -1 -12   1    1.80    0.13
   0 -12   0    0.20    0.07
   1 -12  -1    1.91    0.13
   2 -12  -2    4.79    0.19
   3 -12  -3    1.89    0.13
   5 -12  -5   11.17    0.35
   5 -12  -5   11.40    0.33
   6 -12  -6    5.13    0.19
   6 -12  -6    4.50    0.21
  -6  12   6    5.07    0.17
   7 -12  -7    8.39    0.29
   7 -12  -7    8.67    0.29
  -7  12   7    8.63    0.25
   8 -12  -8    2.67    0.17
   8 -12  -8    2.55    0.18
  -8  12   8    2.52    0.12
   9 -12  -9    0.93    0.14
   9 -12  -9    0.84    0.15
  -6 -11   5    0.11    0.06
  -5 -11   4    8.48    0.26
   5  11  -4    8.48    0.24
  -4 -11   3    1.66    0.11
   4  11  -3    1.73    0.09
  -3 -11   2   15.66    0.42
   3  11  -2   15.44    0.41
  -2 -11   1    2.10    0.07
  -2 -11   1    2.33    0.08
  -2 -11   1    2.38    0.12
   2  11  -1    2.25    0.10
  -1 -11   0   -0.02    0.02
  -1 -11   0    0.03    0.06
   0 -11  -1    0.37    0.07
   1 -11  -2    1.18    0.11
   1 -11  -2    0.99    0.06
   2 -11  -3    1.56    0.08
   2 -11  -3    1.79    0.13
   3 -11  -4    2.92    0.15
   3 -11  -4    2.62    0.11
   4 -11  -5    2.88    0.16
   5 -11  -6    5.11    0.18
   5 -11  -6    5.06    0.23
  -5  11   6    5.44    0.15
   6 -11  -7    0.74    0.09
   6 -11  -7    0.69    0.11
  -6  11   7    0.50    0.06
   7 -11  -8    0.40    0.07
   7 -11  -8    0.44    0.09
  -7  11   8    0.33    0.07
   8 -11  -9    1.42    0.13
   8 -11  -9    1.63    0.12
  -8  11   9    1.30    0.10
   9 -11 -10    5.74    0.22
   9 -11 -10    5.78    0.22
  -9  11  10    5.45    0.19
  -5 -10   3    1.35    0.08
  -5 -10   3    1.14    0.10
   5  10  -3    1.21    0.07
  -4 -10   2    1.13    0.05
  -4 -10   2    1.41    0.10
   4  10  -2    1.56    0.08
  -3 -10   1    1.40    0.05
  -3 -10   1    1.61    0.10
   3  10  -1    1.61    0.08
  -2 -10   0   11.11    0.32
  -1 -10  -1    0.10    0.06
   0 -10  -2    2.00    0.11
   0 -10  -2    2.00    0.07
   1 -10  -3    7.03    0.19
   1 -10  -3    7.03    0.22
   2 -10  -4    2.57    0.10
   2 -10  -4    2.70    0.13
   3 -10  -5    4.79    0.15
   3 -10  -5    4.65    0.18
   4 -10  -6    1.02    0.12
  -4  10   6    1.11    0.06
   5 -10  -7   10.10    0.30
   5 -10  -7   10.83    0.33
  -5  10   7   10.75    0.29
   6 -10  -8    1.27    0.10
   6 -10  -8    1.08    0.13
  -6  10   8    1.15    0.08
   7 -10  -9    0.38    0.08
   7 -10  -9    0.63    0.11
  -7  10   9    0.37    0.08
   8 -10 -10    2.95    0.17
   8 -10 -10    3.25    0.17
  -8  10  10    3.18    0.14
   9 -10 -11    4.01    0.19
   9 -10 -11    3.86    0.19
  -9  10  11    3.85    0.16
  10 -10 -12    0.23    0.08
  10 -10 -12    0.23    0.10
 -10  10  12    0.19    0.07
  -7  -9   4    0.50    0.06
  -6  -9   3    3.42    0.12
  -5  -9   2    3.02    0.13
  -5  -9   2    3.03    0.10
  -4  -9   1    1.31    0.09
   4   9  -1    1.30    0.09
  -3  -9   0    1.23    0.09
  -3  -9   0    1.33    0.04
   3   9   0    1.36    0.08
  -2  -9  -1    7.28    0.22
  -1  -9  -2    2.84    0.13
   0  -9  -3    9.02    0.24
   0  -9  -3    9.67    0.27
   1  -9  -4    0.38    0.05
   1  -9  -4    0.28    0.05
   2  -9  -5   15.66    0.43
   2  -9  -5   15.90    0.41
   3  -9  -6    9.53    0.27
   3  -9  -6    9.74    0.29
  -3   9   6    9.74    0.25
   4  -9  -7    4.99    0.18
  -4   9   7    5.09    0.15
  -4   9   7    4.72    0.15
   5  -9  -8   25.95    0.69
   5  -9  -8   26.13    0.68
  -5   9   8   26.75    0.67
   6  -9  -9    1.42    0.11
   6  -9  -9    1.49    0.13
  -6   9   9    1.49    0.10
   7  -9 -10    0.33    0.08
   7  -9 -10    0.62    0.11
  -7   9  10    0.45    0.09
   8  -9 -11    0.23    0.08
  -8   9  11    0.14    0.06
   9  -9 -12    0.08    0.07
   9  -9 -12   -0.17    0.08
  -9   9  12   -0.02    0.06
  10  -9 -13    3.51    0.19
  10  -9 -13    3.40    0.17
 -10   9  13    3.68    0.17
  -9  -8   5    3.97    0.16
  -8  -8   4    1.16    0.09
  -7  -8   3    7.32    0.22
  -6  -8   2    6.79    0.19
  -5  -8   1    2.05    0.10
  -5  -8   1    1.95    0.08
  -4  -8   0    2.68    0.09
  -4  -8   0    3.07    0.12
  -4  -8   0    2.87    0.09
   4   8   0    2.95    0.10
  -3  -8  -1    0.70    0.03
  -3  -8  -1    0.68    0.07
   3   8   1    0.73    0.06
  -2  -8  -2    0.58    0.08
  -1  -8  -3    1.39    0.10
   0  -8  -4   13.82    0.35
   0  -8  -4   13.96    0.38
   1  -8  -5    0.16    0.03
   1  -8  -5    0.17    0.05
   1  -8  -5    0.23    0.04
   2  -8  -6    1.69    0.08
   2  -8  -6    1.71    0.10
  -2   8   6    1.73    0.05
  -2   8   6    1.65    0.06
   3  -8  -7    2.22    0.12
   3  -8  -7    2.23    0.10
  -3   8   7    2.12    0.08
   4  -8  -8    0.11    0.06
   4  -8  -8    0.01    0.05
  -4   8   8    0.15    0.04
  -4   8   8    0.14    0.04
   5  -8  -9    2.97    0.13
   5  -8  -9    3.05    0.15
  -5   8   9    2.96    0.10
  -5   8   9    3.41    0.13
   6  -8 -10   54.33    1.35
   6  -8 -10   53.89    1.35
  -6   8  10   52.70    1.34
   7  -8 -11    3.52    0.16
   7  -8 -11    3.30    0.16
  -7   8  11    3.10    0.15
   8  -8 -12    0.22    0.08
   8  -8 -12    0.42    0.08
  -8   8  12    0.25    0.06
   9  -8 -13    6.43    0.24
   9  -8 -13    6.19    0.25
  -9   8  13    6.85    0.23
  10  -8 -14    1.10    0.15
  10  -8 -14    1.38    0.13
 -10   8  14    1.56    0.13
 -11  -7   6   -0.02    0.07
  11   7  -6    0.00    0.04
 -10  -7   5    0.18    0.05
  10   7  -5    0.23    0.04
  -9  -7   4   14.33    0.40
   9   7  -4   14.57    0.38
  -8  -7   3    1.68    0.11
   8   7  -3    1.77    0.07
  -7  -7   2    6.51    0.19
   7   7  -2    6.00    0.17
  -6  -7   1    9.77    0.27
  -5  -7   0    8.58    0.23
  -5  -7   0    8.55    0.25
  -4  -7  -1    3.26    0.10
  -4  -7  -1    3.36    0.12
  -4  -7  -1    3.39    0.10
   4   7   1    3.35    0.10
  -3  -7  -2    6.78    0.18
  -3  -7  -2    7.12    0.21
  -2  -7  -3    2.28    0.11
  -1  -7  -4    1.65    0.11
  -1  -7  -4    1.59    0.05
  -1  -7  -4    1.51    0.08
   0  -7  -5   10.76    0.27
   0  -7  -5   10.55    0.27
   0  -7  -5   10.69    0.30
   1  -7  -6    4.89    0.17
   1  -7  -6    4.99    0.15
   1  -7  -6    4.86    0.14
   2  -7  -7    0.48    0.06
   2  -7  -7    0.46    0.09
  -2   7   7    0.39    0.05
  -2   7   7    0.40    0.05
   3  -7  -8   16.86    0.45
   3  -7  -8   16.59    0.44
  -3   7   8   16.34    0.43
  -3   7   8   17.36    0.43
   4  -7  -9   47.86    1.19
   4  -7  -9   48.31    1.18
  -4   7   9   47.59    1.17
  -4   7   9   45.23    1.17
   5  -7 -10    7.57    0.25
   5  -7 -10    8.10    0.25
  -5   7  10    8.18    0.24
   6  -7 -11   28.80    0.74
   6  -7 -11   28.61    0.74
  -6   7  11   27.41    0.73
   7  -7 -12    1.79    0.12
   7  -7 -12    1.67    0.14
  -7   7  12    1.73    0.12
   8  -7 -13    0.87    0.11
   8  -7 -13    0.77    0.12
  -8   7  13    0.71    0.10
   9  -7 -14    3.83    0.19
  -9   7  14    3.45    0.16
  10  -7 -15    1.83    0.12
  10  -7 -15    1.70    0.16
 -10   7  15    2.12    0.13
  11  -7 -16    1.18    0.12
 -12  -6   6    0.07    0.08
  12   6  -6    0.11    0.05
 -11  -6   5   12.80    0.37
  11   6  -5   12.64    0.35
 -10  -6   4    2.83    0.14
  10   6  -4    2.69    0.11
  -9  -6   3    0.07    0.04
  -8  -6   2    0.49    0.08
   8   6  -2    0.60    0.07
  -7  -6   1    0.98    0.08
   7   6  -1    0.98    0.06
   7   6  -1    1.01    0.05
  -6  -6   0    5.14    0.16
   6   6   0    5.32    0.14
  -5  -6  -1    5.48    0.16
   5   6   1    5.32    0.14
  -4  -6  -2   34.24    0.84
  -4  -6  -2   32.73    0.83
  -4  -6  -2   34.28    0.83
  -3  -6  -3   28.69    0.71
  -3  -6  -3   27.92    0.69
  -2  -6  -4   11.78    0.31
  -2  -6  -4   12.01    0.32
  -2  -6  -4   11.64    0.29
  -1  -6  -5    2.28    0.09
  -1  -6  -5    2.23    0.11
  -1  -6  -5    2.33    0.08
   0  -6  -6    2.46    0.12
   0  -6  -6    2.49    0.09
   0  -6  -6    2.51    0.09
   1  -6  -7   33.07    0.80
   1  -6  -7   32.60    0.81
   1  -6  -7   30.81    0.79
  -1   6   7   32.14    0.79
   2  -6  -8    7.13    0.22
   2  -6  -8    7.24    0.21
  -2   6   8    7.31    0.20
  -2   6   8    7.43    0.20
   3  -6  -9   71.87    1.75
   3  -6  -9   70.83    1.75
  -3   6   9   70.40    1.74
  -3   6   9   71.17    1.74
   4  -6 -10   20.38    0.53
   4  -6 -10   21.15    0.53
  -4   6  10   18.43    0.52
  -4   6  10   20.43    0.52
   5  -6 -11   16.32    0.45
   5  -6 -11   16.49    0.44
  -5   6  11   16.76    0.44
   6  -6 -12    2.01    0.12
   6  -6 -12    2.11    0.13
  -6   6  12    2.06    0.13
   7  -6 -13   11.11    0.34
   7  -6 -13   11.20    0.33
  -7   6  13   11.03    0.33
   8  -6 -14    6.37    0.26
   8  -6 -14    6.00    0.22
  -8   6  14    6.62    0.23
   9  -6 -15    0.84    0.10
   9  -6 -15    0.99    0.13
  -9   6  15    0.98    0.11
  10  -6 -16    1.26    0.11
  10  -6 -16    1.51    0.15
 -10   6  16    1.41    0.13
  11  -6 -17    2.50    0.18
 -11   6  17    2.22    0.15
 -13  -5   6    6.68    0.24
  13   5  -6    6.29    0.23
 -12  -5   5    6.86    0.24
  12   5  -5    6.80    0.23
 -11  -5   4    4.26    0.18
 -10  -5   3   12.37    0.36
  10   5  -3   12.11    0.34
  -9  -5   2    0.44    0.09
   9   5  -2    0.60    0.08
  -8  -5   1    2.90    0.12
   8   5  -1    2.98    0.11
   8   5  -1    2.85    0.10
  -7  -5   0    0.36    0.08
   7   5   0    0.30    0.05
   7   5   0    0.24    0.06
  -6  -5  -1   46.72    1.15
   6   5   1   46.53    1.14
  -5  -5  -2   15.10    0.39
   5   5   2   15.28    0.38
   5   5   2   14.72    0.37
  -4  -5  -3   11.55    0.32
  -4  -5  -3   11.67    0.30
  -4  -5  -3   11.81    0.30
   4   5   3   11.87    0.29
   4   5   3   11.57    0.29
  -3  -5  -4    1.16    0.07
  -3  -5  -4    1.49    0.11
  -3  -5  -4    1.20    0.06
  -2  -5  -5   10.98    0.27
  -2  -5  -5   10.38    0.27
  -2  -5  -5   10.64    0.29
  -2  -5  -5   10.65    0.27
  -1  -5  -6   45.28    1.12
  -1  -5  -6   45.82    1.13
  -1  -5  -6   46.19    1.12
   0  -5  -7   25.11    0.62
   0  -5  -7   24.19    0.61
   0  -5  -7   24.03    0.61
   0   5   7   24.99    0.60
   1  -5  -8   37.07    0.91
   1  -5  -8   36.85    0.92
   1  -5  -8   36.63    0.91
  -1   5   8   37.06    0.91
  -1   5   8   36.93    0.91
   2  -5  -9    2.81    0.11
  -2   5   9    2.82    0.11
   3  -5 -10    1.08    0.09
   3  -5 -10    1.17    0.09
  -3   5  10    1.07    0.08
  -3   5  10    1.25    0.08
   4  -5 -11    0.94    0.08
   4  -5 -11    0.88    0.09
  -4   5  11    0.96    0.08
   5  -5 -12   13.80    0.37
   5  -5 -12   13.53    0.38
  -5   5  12   14.11    0.38
   6  -5 -13    2.75    0.13
   6  -5 -13    2.76    0.14
  -6   5  13    2.90    0.14
   7  -5 -14    0.24    0.08
   7  -5 -14    0.16    0.06
  -7   5  14    0.15    0.08
   8  -5 -15   11.35    0.32
  -8   5  15   10.99    0.35
   9  -5 -16   14.23    0.39
   9  -5 -16   13.94    0.42
  -9   5  16   13.66    0.41
  10  -5 -17    2.79    0.14
  10  -5 -17    3.08    0.18
 -10   5  17    3.00    0.17
  11  -5 -18    0.51    0.10
 -11   5  18    0.32    0.09
 -13  -4   5    0.84    0.13
  13   4  -5    0.81    0.12
 -12  -4   4    0.18    0.07
  12   4  -4    0.12    0.06
 -11  -4   3    0.28    0.07
  11   4  -3    0.15    0.08
 -10  -4   2    0.24    0.07
  10   4  -2    0.34    0.06
  -9  -4   1    1.69    0.10
   9   4  -1    1.41    0.10
  -8  -4   0    0.86    0.08
   8   4   0    0.72    0.06
   8   4   0    0.98    0.08
   7   4   1    2.45    0.09
   7   4   1    2.51    0.10
  -6  -4  -2   37.00    0.91
   6   4   2   36.69    0.91
   6   4   2   35.97    0.90
  -5  -4  -3    9.62    0.27
   5   4   3    9.84    0.26
   5   4   3    9.99    0.26
  -4  -4  -4   48.38    1.18
  -4  -4  -4   46.97    1.18
   4   4   4   48.43    1.17
   4   4   4   48.72    1.17
  -3  -4  -5   83.65    2.05
  -3  -4  -5   84.53    2.05
  -3  -4  -5   84.54    2.04
  -3  -4  -5   84.55    2.06
   3   4   5   83.79    2.04
  -2  -4  -6    0.32    0.05
  -2  -4  -6    0.35    0.07
   2   4   6    0.32    0.04
  -1  -4  -7   49.83    1.24
  -1  -4  -7   50.31    1.24
  -1  -4  -7   50.95    1.24
   1   4   7   51.09    1.23
   1   4   7   51.60    1.23
   1   4   7   50.07    1.25
   0  -4  -8   34.65    0.86
   0  -4  -8   35.40    0.85
   0  -4  -8   34.75    0.86
   0   4   8   33.20    0.86
   0   4   8   34.94    0.85
   0   4   8   34.93    0.85
   1  -4  -9   46.11    1.15
   1  -4  -9   46.18    1.15
   1  -4  -9   47.69    1.15
  -1   4   9   47.43    1.15
  -1   4   9   46.52    1.15
  -1   4   9   46.76    1.15
   2  -4 -10   20.27    0.53
   2  -4 -10   20.84    0.52
  -2   4  10   21.12    0.53
  -2   4  10   19.93    0.52
   3  -4 -11   22.68    0.57
   3  -4 -11   22.36    0.58
  -3   4  11   21.58    0.57
  -3   4  11   23.11    0.58
   4  -4 -12    0.28    0.07
   4  -4 -12    0.28    0.06
  -4   4  12    0.45    0.08
   5  -4 -13   21.14    0.57
   5  -4 -13   21.56    0.55
  -5   4  13   21.73    0.56
   6  -4 -14   17.72    0.46
   6  -4 -14   16.69    0.47
  -6   4  14   17.43    0.47
   7  -4 -15    3.22    0.17
   7  -4 -15    3.20    0.13
  -7   4  15    3.28    0.17
   8  -4 -16    0.10    0.05
   8  -4 -16    0.19    0.08
  -8   4  16    0.16    0.08
   9  -4 -17    0.64    0.13
   9  -4 -17    1.00    0.08
  -9   4  17    0.93    0.13
  10  -4 -18    0.79    0.14
 -10   4  18    0.77    0.13
  11  -4 -19    0.84    0.14
 -11   4  19    0.65    0.13
 -13  -3   4    0.52    0.09
  13   3  -4    0.60    0.11
 -12  -3   3    2.18    0.14
  12   3  -3    2.11    0.13
 -11  -3   2    6.36    0.23
  11   3  -2    6.33    0.22
 -10  -3   1    0.46    0.10
  10   3  -1    0.42    0.07
  -9  -3   0    2.02    0.11
   9   3   0    2.07    0.12
  -8  -3  -1   31.54    0.81
   8   3   1   32.24    0.81
  -7  -3  -2    1.25    0.10
   7   3   2    1.12    0.07
   7   3   2    1.27    0.08
  -6  -3  -3   24.11    0.62
   6   3   3   24.84    0.61
   6   3   3   23.42    0.61
  -5  -3  -4   11.24    0.30
   5   3   4   11.01    0.29
  -4  -3  -5    1.00    0.07
  -4  -3  -5    1.02    0.08
   4   3   5    0.93    0.08
   4   3   5    1.06    0.06
  -3  -3  -6  124.41    3.01
  -3  -3  -6  121.18    3.01
   3   3   6  126.54    3.01
  -2  -3  -7    1.73    0.08
  -2  -3  -7    1.91    0.08
  -2  -3  -7    1.74    0.07
   2   3   7    1.84    0.08
   2   3   7    1.83    0.07
   2   3   7    1.67    0.08
  -1  -3  -8    0.23    0.04
  -1  -3  -8    0.30    0.06
  -1  -3  -8    0.19    0.04
   1   3   8    0.23    0.04
   1   3   8    0.31    0.06
   1   3   8    0.25    0.05
   0  -3  -9    9.57    0.26
   0  -3  -9    9.77    0.26
   0  -3  -9    9.82    0.26
   0   3   9    9.70    0.26
   0   3   9    9.84    0.26
   0   3   9    9.82    0.26
   1  -3 -10   11.68    0.30
   1  -3 -10   11.39    0.31
  -1   3  10   11.43    0.31
  -1   3  10   11.25    0.30
  -1   3  10   11.35    0.30
   2  -3 -11   30.87    0.77
   2  -3 -11   31.68    0.78
  -2   3  11   30.39    0.78
  -2   3  11   31.69    0.78
   3  -3 -12   56.79    1.40
   3  -3 -12   58.41    1.41
  -3   3  12   55.76    1.41
   4  -3 -13   21.53    0.56
   4  -3 -13   21.56    0.54
  -4   3  13   21.12    0.56
   5  -3 -14    0.69    0.08
  -5   3  14    0.55    0.09
   6  -3 -15    1.33    0.12
   6  -3 -15    1.23    0.09
  -6   3  15    1.09    0.12
   7  -3 -16    4.27    0.14
   7  -3 -16    4.30    0.19
  -7   3  16    4.11    0.18
   8  -3 -17    6.43    0.20
   8  -3 -17    6.25    0.24
  -8   3  17    6.80    0.24
   9  -3 -18    1.74    0.15
  -9   3  18    2.00    0.14
  10  -3 -19    3.13    0.18
 -10   3  19    3.03    0.19
 -13  -2   3    0.22    0.07
  13   2  -3    0.28    0.08
 -12  -2   2    0.08    0.07
  12   2  -2   -0.08    0.07
 -11  -2   1    2.43    0.14
  11   2  -1    2.37    0.14
 -10  -2   0    3.05    0.15
  10   2   0    3.47    0.16
  -9  -2  -1    5.93    0.20
   9   2   1    5.77    0.20
  -8  -2  -2    9.45    0.27
   8   2   2    9.58    0.27
   8   2   2    8.84    0.24
  -7  -2  -3    5.09    0.17
   7   2   3    5.31    0.17
   7   2   3    4.98    0.14
   6   2   4   26.54    0.68
   6   2   4   27.74    0.69
  -5  -2  -5    4.07    0.14
   5   2   5    4.18    0.15
   5   2   5    3.93    0.14
  -4  -2  -6    6.23    0.19
  -4  -2  -6    6.37    0.16
   4   2   6    6.18    0.18
   4   2   6    6.39    0.19
  -3  -2  -7  117.21    2.95
  -3  -2  -7  124.09    2.95
   3   2   7  120.22    2.96
   3   2   7  122.88    2.95
   3   2   7  122.14    2.95
  -2  -2  -8    4.70    0.14
  -2  -2  -8    4.27    0.14
   2   2   8    4.67    0.14
   2   2   8    4.61    0.14
   2   2   8    4.58    0.14
  -1  -2  -9    0.12    0.04
  -1  -2  -9    0.12    0.03
  -1  -2  -9    0.09    0.04
   1   2   9    0.09    0.04
   1   2   9    0.10    0.03
   1   2   9    0.08    0.04
   0  -2 -10    6.74    0.20
   0  -2 -10    6.89    0.19
   0  -2 -10    7.07    0.20
   0   2  10    6.80    0.19
   0   2  10    6.64    0.19
   0   2  10    6.99    0.20
   1  -2 -11   41.69    1.00
   1  -2 -11   41.77    1.02
  -1   2  11   39.15    1.03
  -1   2  11   41.60    1.01
  -1   2  11   40.39    1.01
   2  -2 -12   56.32    1.38
   2  -2 -12   56.37    1.40
  -2   2  12   56.55    1.41
  -2   2  12   57.30    1.40
   3  -2 -13    1.96    0.08
   3  -2 -13    1.94    0.10
  -3   2  13    1.93    0.11
   4  -2 -14    3.92    0.15
   4  -2 -14    4.01    0.12
  -4   2  14    3.80    0.15
   5  -2 -15    1.51    0.08
   5  -2 -15    1.56    0.10
  -5   2  15    1.57    0.11
   6  -2 -16    4.20    0.15
   6  -2 -16    4.34    0.18
  -6   2  16    4.14    0.18
   7  -2 -17    0.47    0.06
   7  -2 -17    0.48    0.08
  -7   2  17    0.54    0.11
   8  -2 -18    3.38    0.13
   8  -2 -18    3.49    0.17
  -8   2  18    3.13    0.17
   9  -2 -19    0.23    0.08
  -9   2  19    0.53    0.12
  10  -2 -20    1.79    0.16
 -10   2  20    2.05    0.16
 -14  -1   3    2.41    0.17
  14   1  -3    2.07    0.15
 -13  -1   2    5.37    0.22
  13   1  -2    5.66    0.22
 -12  -1   1    9.50    0.30
  12   1  -1    9.11    0.30
 -11  -1   0    2.35    0.14
  11   1   0    2.34    0.15
 -10  -1  -1   44.22    1.12
  10   1   1   43.31    1.11
  -9  -1  -2    0.25    0.06
   9   1   2    0.20    0.04
   9   1   2    0.21    0.07
  -8  -1  -3    4.13    0.15
   8   1   3    3.79    0.12
   8   1   3    4.31    0.16
  -7  -1  -4    1.88    0.10
   7   1   4    1.83    0.10
  -6  -1  -5   39.81    0.97
   6   1   5   37.76    0.97
  -5  -1  -6   37.23    0.91
   5   1   6   35.65    0.91
   5   1   6   36.67    0.91
  -4  -1  -7  119.61    2.87
   4   1   7  118.09    2.87
   4   1   7  116.14    2.88
  -3  -1  -8   55.28    1.38
  -3  -1  -8   55.96    1.38
   3   1   8   56.20    1.38
   3   1   8   57.86    1.38
  -2  -1  -9    1.26    0.07
  -2  -1  -9    1.38    0.08
   2   1   9    1.46    0.08
   2   1   9    1.30    0.08
   2   1   9    1.31    0.07
  -1  -1 -10   11.32    0.29
  -1  -1 -10   10.36    0.29
   1   1  10   11.13    0.28
   1   1  10   10.68    0.29
   1   1  10   11.19    0.30
   0  -1 -11    0.08    0.03
   0  -1 -11    0.06    0.05
   0   1  11    0.09    0.03
   0   1  11    0.14    0.05
  -1   1  12  119.29    2.81
  -1   1  12  115.14    2.82
  -1   1  12  113.00    2.82
   2  -1 -13    3.27    0.13
   2  -1 -13    3.36    0.10
  -2   1  13    3.24    0.14
   3  -1 -14   11.81    0.30
   3  -1 -14   12.01    0.33
  -3   1  14   12.20    0.34
   4  -1 -15   11.06    0.28
   4  -1 -15   10.63    0.31
  -4   1  15   11.16    0.32
   5  -1 -16    1.76    0.12
   5  -1 -16    1.65    0.07
  -5   1  16    1.59    0.12
   6  -1 -17    4.21    0.18
   6  -1 -17    4.29    0.13
  -6   1  17    4.49    0.19
   7  -1 -18    7.67    0.22
   8  -1 -19    0.06    0.07
  -8   1  19    0.33    0.08
   9  -1 -20    1.78    0.14
  -9   1  20    1.96    0.15
  10  -1 -21    1.20    0.15
 -10   1  21    1.08    0.14
 -14   0   2    0.78    0.13
  14   0  -2    0.64    0.14
 -13   0   1    0.08    0.07
  13   0  -1    0.12    0.08
 -12   0   0    6.77    0.24
  12   0   0    6.59    0.25
  11   0   1   -0.06    0.07
 -10   0  -2    9.07    0.29
  10   0   2    9.31    0.29
  -9   0  -3    0.19    0.06
   9   0   3    0.11    0.06
  -8   0  -4   71.51    1.76
   8   0   4   70.11    1.75
  -7   0  -5    2.36    0.11
   7   0   5    2.42    0.12
  -6   0  -6    2.48    0.12
   6   0   6    2.57    0.12
  -5   0  -7    3.96    0.15
  -5   0  -7    3.90    0.12
   5   0   7    3.91    0.15
   4   0   8    0.47    0.10
   4   0   8    0.48    0.07
  -3   0  -9    2.06    0.11
   3   0   9    1.85    0.13
   3   0   9    1.97    0.09
  -2   0 -10   10.48    0.28
   2   0  10    9.51    0.34
  -1   0 -11    0.09    0.05
   1   0  11    0.04    0.03
   1   0  11    0.10    0.04
   0   0 -12    2.75    0.14
   0   0  12    2.93    0.09
   0   0  12    2.90    0.14
   1   0 -13    0.30    0.06
  -1   0  13    0.32    0.05
  -1   0  13    0.37    0.07
   2   0 -14    1.44    0.05
   2   0 -14    1.48    0.10
  -2   0  14    1.25    0.11
   3   0 -15    0.70    0.03
   3   0 -15    0.71    0.09
  -3   0  15    0.69    0.09
   4   0 -16    6.30    0.20
   4   0 -16    6.43    0.17
  -4   0  16    6.45    0.21
   5   0 -17    0.50    0.10
   5   0 -17    0.43    0.04
  -5   0  17    0.50    0.11
   6   0 -18    4.52    0.19
   6   0 -18    4.47    0.13
  -6   0  18    4.51    0.19
   7   0 -19    0.00    0.07
  -7   0  19   -0.02    0.08
   8   0 -20    3.31    0.17
  -8   0  20    3.36    0.17
   9   0 -21   -0.08    0.07
  -9   0  21   -0.05    0.08
  10   0 -22    2.51    0.16
 -10   0  22    2.76    0.18
 -14   1   1    5.53    0.24
  14  -1  -1    5.90    0.22
 -13   1   0    0.76    0.12
  13  -1   0    0.84    0.14
 -12   1  -1   23.68    0.63
  12  -1   1   22.42    0.63
 -11   1  -2    1.19    0.12
  11  -1   2    1.20    0.13
 -10   1  -3    9.68    0.30
  10  -1   3    9.55    0.30
  -9   1  -4   17.75    0.48
   9  -1   4   17.14    0.48
  -8   1  -5   25.31    0.66
   8  -1   5   25.21    0.66
  -7   1  -6    0.36    0.07
   7  -1   6    0.31    0.06
  -6   1  -7   11.09    0.31
   6  -1   7   10.78    0.31
  -5   1  -8   92.54    2.28
  -5   1  -8   93.28    2.26
   5  -1   8   93.36    2.28
  -4   1  -9   33.41    0.86
   4  -1   9   35.16    0.86
  -3   1 -10    0.29    0.06
   3  -1  10    0.23    0.07
  -2   1 -11   89.85    2.22
   2  -1  11   91.96    2.22
  -1   1 -12    0.43    0.09
   1  -1  12    0.40    0.07
   0   1 -13   13.92    0.38
   0  -1  13   14.32    0.38
   0  -1  13   13.94    0.35
   1   1 -14   66.02    1.67
  -1  -1  14   67.37    1.64
  -1  -1  14   69.48    1.67
   2   1 -15    0.36    0.08
  -2  -1  15    0.30    0.06
   3   1 -16   15.24    0.42
  -3  -1  16   16.18    0.43
   4   1 -17   40.08    1.01
  -4  -1  17   39.54    1.01
   5   1 -18    7.18    0.24
  -5  -1  18    7.09    0.24
   6   1 -19    4.25    0.18
  -6  -1  19    4.23    0.19
   7   1 -20    5.37    0.21
  -7  -1  20    5.58    0.22
   8   1 -21    0.03    0.08
  -8  -1  21    0.06    0.08
   9   1 -22   -0.13    0.08
  -9  -1  22   -0.05    0.08
  10   1 -23    4.67    0.17
 -10  -1  23    3.59    0.20
 -13   2  -1    6.33    0.24
  13  -2   1    6.30    0.25
 -12   2  -2    3.33    0.17
  12  -2   2    3.64    0.18
 -11   2  -3    0.12    0.07
  11  -2   3    0.08    0.08
 -10   2  -4   26.77    0.71
  -9   2  -5    6.12    0.22
   9  -2   5    6.11    0.22
  -8   2  -6   12.44    0.36
   8  -2   6   12.64    0.36
  -7   2  -7    8.55    0.25
   7  -2   7    8.08    0.26
  -6   2  -8   13.36    0.37
   6  -2   8   13.37    0.37
  -5   2  -9    2.42    0.11
  -5   2  -9    2.29    0.10
   5  -2   9    2.58    0.12
  -4   2 -10   34.52    0.87
   4  -2  10   34.95    0.88
  -3   2 -11   70.92    1.73
   3  -2  11   69.72    1.73
  -2   2 -12    7.02    0.21
   2  -2  12    6.70    0.21
  -1   2 -13   23.97    0.63
   1  -2  13   25.10    0.63
   0   2 -14   15.40    0.41
   0  -2  14   15.04    0.38
   0  -2  14   15.64    0.41
  -1  -2  15    3.30    0.14
   2   2 -16    7.60    0.23
  -2  -2  16    7.73    0.24
   3   2 -17    6.75    0.21
  -3  -2  17    6.55    0.22
   4   2 -18    1.67    0.12
  -4  -2  18    1.76    0.13
   5   2 -19    7.86    0.26
  -5  -2  19    8.37    0.27
   6   2 -20    0.06    0.07
  -6  -2  20    0.14    0.08
   7   2 -21    0.03    0.07
  -7  -2  21    0.15    0.08
   8   2 -22   -0.08    0.07
  -8  -2  22    0.08    0.09
   9   2 -23    3.65    0.19
  -9  -2  23    3.34    0.19
 -13   3  -2    0.21    0.08
  13  -3   2    0.04    0.08
 -12   3  -3    0.49    0.07
  12  -3   3    0.30    0.08
 -11   3  -4    3.46    0.16
  11  -3   4    3.40    0.18
 -10   3  -5    3.75    0.20
  10  -3   5    3.96    0.18
  -9   3  -6    6.65    0.23
   9  -3   6    6.81    0.24
  -8   3  -7    1.39    0.11
   8  -3   7    1.30    0.11
  -7   3  -8   43.96    1.12
   7  -3   8   44.83    1.12
  -6   3  -9    1.52    0.09
  -6   3  -9    1.42    0.10
   6  -3   9    1.58    0.11
  -5   3 -10    6.83    0.21
  -5   3 -10    7.07    0.21
   5  -3  10    6.96    0.22
  -4   3 -11    3.18    0.13
   4  -3  11    3.34    0.14
  -3   3 -12   11.17    0.31
   3  -3  12   11.61    0.32
  -2   3 -13    0.09    0.04
   2  -3  13    0.11    0.06
  -1   3 -14   11.51    0.32
   1  -3  14   11.85    0.33
   0   3 -15    8.30    0.24
   0  -3  15    8.42    0.25
   1   3 -16    0.17    0.04
  -1  -3  16    0.29    0.06
  -2  -3  17    5.87    0.20
   3   3 -18    0.18    0.06
  -3  -3  18    0.09    0.07
   4   3 -19    2.18    0.13
  -4  -3  19    2.07    0.14
   5   3 -20    6.79    0.26
  -5  -3  20    7.01    0.25
   6   3 -21    7.29    0.25
  -6  -3  21    6.87    0.29
   7   3 -22    0.62    0.11
  -7  -3  22    0.48    0.09
   8   3 -23    0.69    0.13
  -8  -3  23    0.76    0.13
   9   3 -24    0.31    0.09
  -9  -3  24    0.12    0.09
 -13   4  -3    0.10    0.08
  13  -4   3   -0.03    0.08
 -12   4  -4    0.28    0.07
  12  -4   4    0.41    0.09
 -11   4  -5   12.20    0.37
  11  -4   5   12.73    0.39
 -10   4  -6    3.58    0.17
  10  -4   6    3.75    0.19
  -9   4  -7    1.54    0.12
   9  -4   7    1.45    0.14
  -8   4  -8    6.29    0.21
   8  -4   8    6.04    0.23
  -7   4  -9    1.17    0.10
   7  -4   9    1.12    0.12
  -6   4 -10   13.27    0.37
  -6   4 -10   13.62    0.37
   6  -4  10   13.49    0.38
  -5   4 -11    0.27    0.05
  -5   4 -11    0.28    0.05
   5  -4  11    0.31    0.06
  -4   4 -12    1.86    0.10
   4  -4  12    1.68    0.12
  -3   4 -13    0.19    0.05
   3  -4  13    0.19    0.06
  -2   4 -14   27.44    0.69
   2  -4  14   26.53    0.70
  -1   4 -15    5.29    0.17
   1  -4  15    5.38    0.19
   0   4 -16   50.48    1.26
   0  -4  16   50.98    1.27
   1   4 -17   16.79    0.44
  -1  -4  17   16.29    0.45
   2   4 -18    1.05    0.08
  -2  -4  18    0.88    0.11
  -3  -4  19    0.15    0.07
   4   4 -20    1.52    0.14
  -4  -4  20    1.68    0.13
   5   4 -21    0.25    0.07
  -5  -4  21    0.34    0.08
   6   4 -22    0.31    0.07
  -6  -4  22    0.31    0.09
   7   4 -23    1.01    0.11
  -7  -4  23    0.89    0.13
   8   4 -24    0.03    0.07
 -13   5  -4    0.54    0.11
 -12   5  -5    6.88    0.25
  12  -5   5    6.73    0.26
 -11   5  -6    1.06    0.11
  11  -5   6    0.95    0.14
 -10   5  -7    1.99    0.13
  10  -5   7    1.84    0.15
  -9   5  -8    7.22    0.24
  -8   5  -9   16.61    0.45
   8  -5   9   15.89    0.46
  -7   5 -10    4.65    0.17
  -7   5 -10    4.75    0.17
   7  -5  10    4.85    0.20
  -6   5 -11    4.35    0.16
  -6   5 -11    4.01    0.15
   6  -5  11    3.94    0.17
  -5   5 -12    2.17    0.11
  -5   5 -12    2.28    0.11
   5  -5  12    2.09    0.13
  -4   5 -13    5.29    0.18
   4  -5  13    5.45    0.19
  -3   5 -14    4.52    0.16
   3  -5  14    4.58    0.17
  -2   5 -15    3.26    0.13
   2  -5  15    3.35    0.15
  -1   5 -16   34.39    0.87
   1  -5  16   34.20    0.88
   0   5 -17   15.71    0.42
   0  -5  17   15.69    0.43
   0  -5  17   15.56    0.39
   1   5 -18   22.93    0.59
  -1  -5  18   22.56    0.61
   2   5 -19    2.97    0.13
  -2  -5  19    2.85    0.15
   3   5 -20    0.54    0.08
  -3  -5  20    0.62    0.11
   4   5 -21    4.54    0.19
  -4  -5  21    4.99    0.20
  -5  -5  22    0.65    0.15
   6   5 -23    0.93    0.12
  -6  -5  23    0.87    0.13
   7   5 -24    0.94    0.12
  -7  -5  24    0.79    0.13
   8   5 -25    3.99    0.19
  -8  -5  25    4.08    0.21
 -12   6  -6   -0.15    0.07
  12  -6   6    0.15    0.09
 -11   6  -7    1.41    0.12
  11  -6   7    1.22    0.15
 -10   6  -8    5.51    0.21
  10  -6   8    5.63    0.23
  -9   6  -9    3.19    0.16
   9  -6   9    3.13    0.18
  -8   6 -10    1.30    0.13
   8  -6  10    1.18    0.13
  -7   6 -11    5.87    0.21
  -7   6 -11    6.12    0.21
   7  -6  11    6.27    0.23
  -6   6 -12    2.10    0.12
  -6   6 -12    2.09    0.12
   6  -6  12    2.15    0.15
  -5   6 -13    4.27    0.16
  -5   6 -13    4.18    0.16
   5  -6  13    4.17    0.18
  -4   6 -14   22.51    0.58
   4  -6  14   21.91    0.59
  -3   6 -15    0.33    0.07
   3  -6  15    0.28    0.07
  -2   6 -16    0.42    0.07
   2  -6  16    0.32    0.07
  -1   6 -17   13.87    0.38
   1  -6  17   13.63    0.39
   0   6 -18    2.96    0.13
   0  -6  18    3.02    0.15
   0  -6  18    2.93    0.10
   1   6 -19    6.63    0.22
  -1  -6  19    6.96    0.24
   2   6 -20   14.75    0.41
  -2  -6  20   14.69    0.43
  -3  -6  21    5.88    0.23
   4   6 -22    0.02    0.05
  -4  -6  22   -0.12    0.08
   5   6 -23    1.07    0.09
  -5  -6  23    1.14    0.14
   6   6 -24    1.12    0.10
  -6  -6  24    1.27    0.15
   7   6 -25    4.71    0.18
  -7  -6  25    5.02    0.24
 -12   7  -7    1.17    0.12
  12  -7   7    1.02    0.16
 -11   7  -8    0.16    0.07
  11  -7   8    0.13    0.09
 -10   7  -9    0.25    0.07
  10  -7   9    0.17    0.09
  -9   7 -10    0.08    0.06
   9  -7  10   -0.03    0.08
  -8   7 -11    0.91    0.10
   8  -7  11    0.78    0.15
  -7   7 -12    0.75    0.11
  -7   7 -12    0.80    0.11
   7  -7  12    0.59    0.13
  -6   7 -13   25.31    0.66
  -6   7 -13   25.66    0.66
   6  -7  13   24.35    0.67
  -5   7 -14   24.37    0.64
  -5   7 -14   24.18    0.64
   5  -7  14   24.60    0.65
  -4   7 -15   31.45    0.80
   4  -7  15   30.24    0.81
  -3   7 -16    0.22    0.05
   3  -7  16    0.19    0.08
  -2   7 -17   35.17    0.89
   2  -7  17   34.33    0.90
  -1   7 -18    4.06    0.15
   1  -7  18    3.72    0.18
   1  -7  18    3.81    0.13
   0   7 -19    0.76    0.09
   0  -7  19    0.77    0.12
   1   7 -20    8.25    0.25
  -1  -7  20    7.97    0.27
  -2  -7  21   20.73    0.57
   3   7 -22    0.75    0.08
  -3  -7  22    0.83    0.12
   4   7 -23    4.14    0.16
  -4  -7  23    4.19    0.20
   5   7 -24    0.11    0.05
  -5  -7  24    0.17    0.08
   6   7 -25    2.92    0.14
  -6  -7  25    2.75    0.17
 -11   8  -9    0.18    0.07
  11  -8   9    0.30    0.10
 -10   8 -10    1.03    0.12
  10  -8  10    1.04    0.14
  -9   8 -11    0.55    0.09
   9  -8  11    0.40    0.09
  -8   8 -12    0.15    0.06
   8  -8  12    0.12    0.08
  -7   8 -13    0.44    0.09
  -7   8 -13    0.48    0.09
  -6   8 -14   62.64    1.61
   6  -8  14   65.78    1.62
  -5   8 -15    2.69    0.14
   5  -8  15    2.49    0.17
  -4   8 -16    8.96    0.27
   4  -8  16    8.73    0.29
  -3   8 -17    2.92    0.13
   3  -8  17    2.87    0.17
  -2   8 -18    1.32    0.10
   2  -8  18    1.46    0.14
  -1   8 -19    2.24    0.11
   1  -8  19    2.22    0.14
   0   8 -20    2.82    0.12
   0  -8  20    2.54    0.15
   1   8 -21    0.41    0.07
  -1  -8  21    0.34    0.08
   2   8 -22    0.38    0.08
  -2  -8  22    0.17    0.08
   3   8 -23    0.62    0.08
  -3  -8  23    0.54    0.12
   4   8 -24    1.01    0.09
  -4  -8  24    0.78    0.13
   5   8 -25    0.04    0.06
  -5  -8  25    0.18    0.09
 -10   9 -11    4.38    0.18
  10  -9  11    4.24    0.22
  -9   9 -12    0.05    0.06
   9  -9  12    0.17    0.09
  -8   9 -13    0.30    0.06
   8  -9  13    0.37    0.09
  -7   9 -14    0.06    0.06
  -7   9 -14    0.21    0.08
   7  -9  14    0.13    0.08
  -6   9 -15    1.21    0.13
  -6   9 -15    1.39    0.11
  -5   9 -16    0.75    0.12
  -5   9 -16    0.53    0.09
   5  -9  16    0.65    0.14
  -4   9 -17   18.36    0.49
   4  -9  17   17.95    0.51
  -3   9 -18    0.70    0.09
   3  -9  18    0.69    0.12
  -2   9 -19    4.88    0.20
   2  -9  19    5.45    0.21
   2  -9  19    5.27    0.19
  -1   9 -20    5.49    0.19
   1  -9  20    5.69    0.22
   0   9 -21    0.09    0.05
   0  -9  21    0.10    0.07
   1   9 -22    0.30    0.05
   2   9 -23    3.18    0.14
  -2  -9  23    3.73    0.18
   3   9 -24    0.29    0.06
  -3  -9  24    0.37    0.09
   4   9 -25    5.52    0.19
  -4  -9  25    5.29    0.23
  -9  10 -13    2.18    0.13
   9 -10  13    2.20    0.17
  -8  10 -14    0.03    0.06
   8 -10  14    0.24    0.09
  -7  10 -15    0.00    0.06
  -7  10 -15    0.03    0.08
   7 -10  15   -0.03    0.08
  -6  10 -16    2.12    0.12
  -6  10 -16    2.12    0.15
   6 -10  16    2.40    0.16
  -5  10 -17    2.03    0.11
  -5  10 -17    2.16    0.15
   5 -10  17    2.05    0.15
  -4  10 -18    4.77    0.17
  -4  10 -18    5.05    0.20
  -3  10 -19    1.95    0.11
  -2  10 -20    5.89    0.20
  -1  10 -21    3.56    0.14
   0  10 -22    0.11    0.05
   1  10 -23    0.19    0.05
  -1 -10  23    0.17    0.08
   2  10 -24   -0.09    0.06
  -2 -10  24   -0.07    0.08
  -8  11 -15   -0.08    0.07
   8 -11  15   -0.03    0.10
  -7  11 -16    1.72    0.12
  -7  11 -16    1.90    0.15
   7 -11  16    1.53    0.15
  -6  11 -17    0.03    0.06
  -6  11 -17   -0.07    0.08
   6 -11  17    0.17    0.09
  -5  11 -18    0.33    0.09
  -5  11 -18    0.25    0.05
   5 -11  18    0.17    0.09
  -4  11 -19    5.75    0.23
  -4  11 -19    5.85    0.20
   4 -11  19    5.99    0.23
  -3  11 -20    3.12    0.13
   3 -11  20    2.95    0.17
  -2  11 -21    1.28    0.10
   2 -11  21    1.34    0.15
  -1  11 -22    1.14    0.09
   1 -11  22    1.20    0.14
   0  11 -23    4.36    0.15
   0 -11  23    4.08    0.20
   1  11 -24    1.11    0.10
  -1 -11  24    1.30    0.20
  -5  12 -19    0.18    0.08
  -4  12 -20    0.21    0.08
  -4  12 -20    0.04    0.06
   4 -12  20    0.01    0.09
  -3  12 -21    1.89    0.11
   3 -12  21    2.47    0.17
  -1 -17   4    0.51    0.09
   0 -17   3    6.95    0.26
   1 -17   2    0.36    0.08
   2 -17   1    0.11    0.09
  -4 -16   6    1.21    0.12
  -3 -16   5    1.96    0.14
  -2 -16   4    2.98    0.16
  -1 -16   3    0.26    0.08
   0 -16   2    0.35    0.08
   1 -16   1    2.19    0.15
   2 -16   0    3.37    0.17
   3 -16  -1   -0.02    0.08
   4 -16  -2    1.50    0.13
   5 -16  -3    1.47    0.15
  -6 -15   7    0.38    0.08
  -5 -15   6    3.49    0.17
  -4 -15   5    1.40    0.14
   4  15  -5    1.74    0.10
  -3 -15   4    1.84    0.13
  -2 -15   3    3.17    0.17
  -1 -15   2    0.52    0.11
   0 -15   1   10.33    0.33
   1 -15   0    1.47    0.14
   2 -15  -1   10.89    0.34
   3 -15  -2    0.03    0.08
   4 -15  -3    1.08    0.14
   5 -15  -4    1.29    0.15
   6 -15  -5    2.24    0.17
  -6 -14   6    2.01    0.14
  -5 -14   5    0.06    0.07
   5  14  -5    0.00    0.07
  -4 -14   4    2.44    0.14
   4  14  -4    2.49    0.11
  -3 -14   3   10.19    0.32
  -2 -14   2   24.16    0.65
  -1 -14   1    0.74    0.12
   0 -14   0   59.42    1.50
   1 -14  -1    0.72    0.11
   2 -14  -2   24.11    0.65
   3 -14  -3   10.39    0.33
   4 -14  -4    2.77    0.16
   5 -14  -5    0.12    0.08
   6 -14  -6    2.11    0.16
   7 -14  -7    0.68    0.14
  -5 -13   4    1.14    0.11
   5  13  -4    1.05    0.08
  -4 -13   3    0.37    0.08
   4  13  -3    0.43    0.07
  -3 -13   2    4.89    0.19
  -2 -13   1    2.68    0.15
  -1 -13   0   16.95    0.47
   0 -13  -1    8.72    0.28
   2 -13  -3    0.72    0.12
   3 -13  -4   17.32    0.49
   4 -13  -5    0.84    0.13
   5 -13  -6    2.01    0.14
   6 -13  -7    1.07    0.13
   7 -13  -8    2.69    0.17
   8 -13  -9    1.56    0.16
  -6 -12   4    1.53    0.11
   6  12  -4    1.28    0.08
  -5 -12   3   27.35    0.71
   5  12  -3   26.70    0.69
  -4 -12   2    2.57    0.14
   4  12  -2    2.70    0.11
  -3 -12   1    4.25    0.17
  -2 -12   0    0.50    0.09
  -1 -12  -1    0.12    0.07
   0 -12  -2    5.28    0.20
   1 -12  -3    3.59    0.16
   2 -12  -4   10.23    0.32
   3 -12  -5    2.02    0.16
   4 -12  -6   14.11    0.41
   5 -12  -7   -0.03    0.08
   6 -12  -8    0.26    0.09
   7 -12  -9    5.22    0.21
  -7  12   9    5.35    0.18
   8 -12 -10    4.91    0.22
  -8  12  10    5.16    0.18
   9 -12 -11    0.44    0.10
  -6 -11   3    4.02    0.17
   6  11  -3    3.73    0.12
  -5 -11   2    4.55    0.17
   5  11  -2    4.53    0.14
  -4 -11   1    1.16    0.11
   4  11  -1    1.23    0.07
  -3 -11   0    4.78    0.18
  -2 -11  -1    0.90    0.10
  -1 -11  -2    0.05    0.07
   0 -11  -3    4.37    0.13
   0 -11  -3    3.99    0.17
   1 -11  -4    0.82    0.11
   1 -11  -4    0.75    0.06
   2 -11  -5   10.85    0.29
   2 -11  -5   10.79    0.32
   3 -11  -6    0.18    0.07
   3 -11  -6    0.10    0.05
   4 -11  -7    1.11    0.09
   4 -11  -7    1.01    0.11
   5 -11  -8    8.55    0.25
  -5  11   8    8.22    0.23
   6 -11  -9    0.17    0.08
   6 -11  -9    0.28    0.06
  -6  11   9    0.21    0.04
   7 -11 -10    4.02    0.17
   7 -11 -10    3.58    0.18
  -7  11  10    3.72    0.14
   8 -11 -11    2.40    0.15
  -8  11  11    1.91    0.11
   9 -11 -12    4.90    0.22
   9 -11 -12    5.03    0.21
  -9  11  12    4.71    0.18
  -6 -10   2    0.91    0.10
   6  10  -2    0.81    0.06
  -5 -10   1   -0.01    0.06
   5  10  -1    0.04    0.04
  -4 -10   0   10.00    0.25
  -4 -10   0    9.76    0.29
   4  10   0    9.40    0.26
  -3 -10  -1    0.75    0.10
  -2 -10  -2    1.54    0.10
  -1 -10  -3   13.33    0.37
   0 -10  -4    3.30    0.14
   0 -10  -4    3.23    0.09
   1 -10  -5    0.12    0.05
   1 -10  -5    0.06    0.03
   2 -10  -6   10.73    0.29
   2 -10  -6   10.46    0.31
   3 -10  -7   14.64    0.39
   3 -10  -7   14.46    0.41
   4 -10  -8    2.46    0.13
   4 -10  -8    2.15    0.14
  -4  10   8    2.34    0.08
   5 -10  -9    0.22    0.06
   5 -10  -9    0.13    0.08
  -5  10   9    0.05    0.04
   6 -10 -10    1.13    0.10
  -6  10  10    0.98    0.09
   7 -10 -11    0.71    0.12
   7 -10 -11    0.96    0.11
  -7  10  11    0.81    0.09
   8 -10 -12    1.72    0.13
  -8  10  12    1.85    0.11
   9 -10 -13   13.66    0.41
   9 -10 -13   13.21    0.40
  -9  10  13   13.38    0.39
  -7  -9   2    4.80    0.16
  -6  -9   1    0.29    0.05
   6   9  -1    0.27    0.05
  -5  -9   0    1.55    0.10
  -5  -9   0    1.44    0.06
   5   9   0    1.47    0.07
  -4  -9  -1    0.26    0.06
  -4  -9  -1    0.28    0.04
  -3  -9  -2    2.79    0.12
  -2  -9  -3   40.80    1.02
  -1  -9  -4    0.03    0.02
  -1  -9  -4    0.01    0.05
  -1  -9  -4    0.03    0.02
   0  -9  -5   11.09    0.27
   0  -9  -5    9.49    0.27
   0  -9  -5   11.63    0.31
   1  -9  -6    3.13    0.10
   1  -9  -6    3.22    0.14
   2  -9  -7    3.49    0.14
   2  -9  -7    3.42    0.12
   3  -9  -8    4.54    0.17
   3  -9  -8    4.56    0.15
   4  -9  -9   17.54    0.48
   4  -9  -9   17.78    0.49
  -4   9   9   18.25    0.46
   5  -9 -10    0.79    0.12
   5  -9 -10    0.79    0.10
  -5   9  10    0.79    0.08
   6  -9 -11   16.88    0.47
   6  -9 -11   16.48    0.46
  -6   9  11   16.87    0.45
   7  -9 -12    0.68    0.12
   7  -9 -12    0.50    0.09
  -7   9  12    0.39    0.09
   8  -9 -13    1.30    0.12
  -8   9  13    1.20    0.11
   9  -9 -14    4.20    0.18
   9  -9 -14    3.99    0.20
  -9   9  14    3.90    0.17
  10  -9 -15    2.89    0.16
  10  -9 -15    2.65    0.19
 -10   9  15    2.73    0.16
  -9  -8   3    1.78    0.11
  -7  -8   1    2.90    0.11
  -6  -8   0   40.66    0.97
   6   8   0   37.76    0.96
  -5  -8  -1    0.29    0.05
  -5  -8  -1    0.26    0.04
   5   8   1    0.26    0.04
  -4  -8  -2    4.06    0.15
  -4  -8  -2    3.90    0.12
  -3  -8  -3   51.74    1.28
  -3  -8  -3   53.73    1.31
  -2  -8  -4   83.41    2.05
  -1  -8  -5   20.06    0.52
  -1  -8  -5   19.84    0.49
   0  -8  -6    5.76    0.16
   0  -8  -6    5.98    0.19
   0  -8  -6    5.81    0.16
   1  -8  -7    0.14    0.05
   1  -8  -7    0.05    0.03
   2  -8  -8    2.59    0.10
   2  -8  -8    2.57    0.11
  -2   8   8    2.36    0.09
  -2   8   8    2.55    0.08
   3  -8  -9    4.77    0.17
   3  -8  -9    4.54    0.16
  -3   8   9    4.59    0.14
  -3   8   9    4.90    0.14
   4  -8 -10   29.57    0.76
   4  -8 -10   30.03    0.77
  -4   8  10   28.29    0.74
  -4   8  10   30.83    0.75
   5  -8 -11    4.02    0.17
   5  -8 -11    4.12    0.17
  -5   8  11    4.19    0.15
   6  -8 -12    6.31    0.22
   6  -8 -12    6.29    0.22
  -6   8  12    6.47    0.21
   7  -8 -13    4.09    0.18
   7  -8 -13    4.26    0.19
  -7   8  13    4.30    0.17
  -8   8  14   14.97    0.43
   9  -8 -15    1.00    0.14
   9  -8 -15    1.49    0.12
  -9   8  15    1.09    0.12
  10  -8 -16    1.08    0.12
  10  -8 -16    1.21    0.15
 -10   8  16    1.02    0.14
 -11  -7   4    1.05    0.12
  11   7  -4    1.07    0.08
 -10  -7   3   25.54    0.68
  10   7  -3   25.92    0.65
  -9  -7   2    4.24    0.16
   9   7  -2    4.49    0.13
  -8  -7   1   38.90    0.98
   8   7  -1   38.59    0.95
  -7  -7   0    4.76    0.15
   7   7   0    4.73    0.13
   7   7   0    4.72    0.13
  -6  -7  -1   39.22    0.96
   6   7   1   38.34    0.95
  -5  -7  -2    0.99    0.09
  -5  -7  -2    1.04    0.06
  -4  -7  -3    0.65    0.04
  -4  -7  -3    0.69    0.08
  -4  -7  -3    0.64    0.05
  -3  -7  -4    3.82    0.14
  -3  -7  -4    3.52    0.10
  -2  -7  -5    5.50    0.15
  -2  -7  -5    5.57    0.16
  -2  -7  -5    5.41    0.18
  -1  -7  -6    9.35    0.25
  -1  -7  -6    9.82    0.24
  -1  -7  -6    9.89    0.26
  -1  -7  -6    8.26    0.24
   0  -7  -7   16.60    0.44
   0  -7  -7   17.13    0.42
   0  -7  -7   16.85    0.43
   1  -7  -8    3.47    0.11
   1  -7  -8    3.42    0.14
  -1   7   8    3.42    0.10
  -1   7   8    3.37    0.10
   2  -7  -9    3.92    0.14
   2  -7  -9    3.72    0.13
  -2   7   9    3.69    0.12
  -2   7   9    3.75    0.13
   3  -7 -10   14.49    0.40
   3  -7 -10   15.41    0.41
  -3   7  10   15.70    0.39
  -3   7  10   14.44    0.39
   4  -7 -11    2.72    0.12
   4  -7 -11    2.52    0.12
  -4   7  11    2.69    0.11
  -4   7  11    2.40    0.10
   5  -7 -12    4.11    0.16
   5  -7 -12    3.90    0.16
  -5   7  12    4.08    0.15
   6  -7 -13   61.15    1.53
   6  -7 -13   61.57    1.53
  -6   7  13   60.87    1.53
   7  -7 -14    0.32    0.08
   7  -7 -14    0.47    0.09
  -7   7  14    0.43    0.08
   8  -7 -15   10.08    0.34
   8  -7 -15   10.64    0.32
  -8   7  15   10.82    0.32
   9  -7 -16    3.23    0.18
  -9   7  16    3.12    0.17
  10  -7 -17    0.07    0.07
  10  -7 -17    0.20    0.09
 -10   7  17   -0.09    0.08
 -13  -6   5    0.05    0.11
  13   6  -5    0.07    0.06
  12   6  -4    1.33    0.10
 -11  -6   3   13.44    0.39
  11   6  -3   13.53    0.37
 -10  -6   2    3.41    0.15
  10   6  -2    3.65    0.13
  -9  -6   1    2.19    0.11
   9   6  -1    2.41    0.10
  -8  -6   0    3.01    0.13
   8   6   0    3.20    0.11
  -7  -6  -1    7.83    0.23
   7   6   1    7.79    0.21
   7   6   1    8.32    0.22
  -6  -6  -2    8.15    0.22
   6   6   2    8.27    0.21
   6   6   2    7.63    0.21
  -5  -6  -3    7.14    0.20
  -4  -6  -4    6.94    0.19
  -4  -6  -4    6.79    0.19
  -4  -6  -4    6.98    0.21
  -3  -6  -5   61.20    1.49
  -3  -6  -5   63.06    1.51
  -3  -6  -5   59.34    1.49
  -2  -6  -6   10.27    0.27
  -2  -6  -6   10.08    0.26
  -2  -6  -6   10.20    0.26
  -2  -6  -6   10.65    0.28
  -1  -6  -7   12.45    0.32
  -1  -6  -7   12.87    0.34
  -1  -6  -7   12.34    0.32
   0  -6  -8   35.12    0.88
   0  -6  -8   35.47    0.88
   0  -6  -8   36.86    0.90
   0   6   8   35.91    0.87
   0   6   8   35.89    0.87
   1  -6  -9    0.11    0.04
   1  -6  -9    0.09    0.05
  -1   6   9    0.16    0.04
  -1   6   9    0.12    0.03
   2  -6 -10    0.88    0.08
   2  -6 -10    0.87    0.08
  -2   6  10    0.89    0.06
  -2   6  10    0.91    0.07
   3  -6 -11    3.42    0.13
  -3   6  11    3.55    0.12
  -3   6  11    3.24    0.12
   4  -6 -12   26.97    0.69
   4  -6 -12   26.78    0.69
  -4   6  12   26.79    0.69
   5  -6 -13    1.67    0.11
   5  -6 -13    1.78    0.11
  -5   6  13    1.86    0.11
   6  -6 -14   39.51    0.98
   6  -6 -14   37.62    0.99
  -6   6  14   38.48    0.98
   7  -6 -15    0.40    0.09
   7  -6 -15    0.30    0.06
   8  -6 -16    6.63    0.22
   8  -6 -16    6.80    0.25
  -8   6  16    6.48    0.24
   9  -6 -17    3.69    0.15
   9  -6 -17    3.76    0.19
  -9   6  17    3.66    0.18
  10  -6 -18    0.64    0.14
 -10   6  18    0.43    0.10
 -13  -5   4    0.15    0.07
  13   5  -4    0.05    0.06
  12   5  -3    1.99    0.12
 -11  -5   2    0.95    0.10
  11   5  -2    0.80    0.09
 -10  -5   1   -0.04    0.06
  10   5  -1    0.01    0.05
  -9  -5   0    5.05    0.18
   9   5   0    5.06    0.17
  -8  -5  -1    1.53    0.09
   8   5   1    1.69    0.09
   8   5   1    1.51    0.07
  -7  -5  -2    7.88    0.23
   7   5   2    7.58    0.21
   7   5   2    8.38    0.22
  -6  -5  -3    7.85    0.22
   6   5   3    7.90    0.21
  -5  -5  -4    4.21    0.13
   5   5   4    4.38    0.12
   5   5   4    4.35    0.12
  -4  -5  -5   40.70    1.02
  -4  -5  -5   41.91    1.02
   4   5   5   42.13    1.01
   4   5   5   40.69    1.01
  -3  -5  -6  106.38    2.52
  -3  -5  -6  104.47    2.54
  -3  -5  -6  105.06    2.53
  -3  -5  -6  101.58    2.53
   3   5   6  105.19    2.52
   3   5   6  102.09    2.52
  -2  -5  -7   50.25    1.23
  -2  -5  -7   49.82    1.25
  -2  -5  -7   49.89    1.23
   2   5   7   51.22    1.22
   2   5   7   50.97    1.22
  -1  -5  -8    1.69    0.08
  -1  -5  -8    1.80    0.08
   1   5   8    1.81    0.07
   0  -5  -9    7.34    0.22
   0  -5  -9    8.15    0.22
   0   5   9    8.25    0.22
   0   5   9    8.12    0.21
   1  -5 -10   82.21    1.98
  -1   5  10   80.02    1.98
  -1   5  10   80.81    1.97
   2  -5 -11    2.81    0.12
   2  -5 -11    2.77    0.12
  -2   5  11    2.78    0.11
  -2   5  11    2.96    0.11
   3  -5 -12    0.18    0.05
   3  -5 -12    0.18    0.06
  -3   5  12    0.11    0.05
  -3   5  12    0.09    0.04
   4  -5 -13    2.90    0.13
   4  -5 -13    3.13    0.12
  -4   5  13    2.91    0.13
   5  -5 -14    0.41    0.08
   5  -5 -14    0.50    0.10
  -5   5  14    0.39    0.07
   6  -5 -15   10.95    0.31
   6  -5 -15   10.35    0.32
  -6   5  15   10.79    0.32
   7  -5 -16    3.85    0.18
   7  -5 -16    3.60    0.14
   8  -5 -17    3.07    0.13
   8  -5 -17    3.33    0.18
  -8   5  17    3.22    0.17
   9  -5 -18    0.16    0.06
   9  -5 -18    0.33    0.09
  -9   5  18    0.15    0.09
  10  -5 -19   11.56    0.37
 -10   5  19   11.17    0.36
 -13  -4   3   -0.05    0.08
  13   4  -3   -0.10    0.06
 -12  -4   2   -0.02    0.09
  12   4  -2    0.01    0.06
 -11  -4   1    0.58    0.11
 -10  -4   0    1.29    0.10
  10   4   0    1.41    0.11
  -9  -4  -1    3.75    0.15
   9   4   1    3.59    0.14
  -8  -4  -2    3.75    0.14
   8   4   2    3.43    0.12
   8   4   2    3.67    0.13
  -7  -4  -3   16.48    0.46
   7   4   3   17.96    0.44
   7   4   3   16.02    0.43
  -6  -4  -4    6.12    0.18
   6   4   4    5.90    0.17
   6   4   4    6.31    0.18
  -5  -4  -5    1.71    0.08
   5   4   5    1.69    0.08
   5   4   5    1.66    0.07
  -4  -4  -6   62.28    1.52
   4   4   6   61.80    1.51
  -3  -4  -7    2.12    0.09
  -3  -4  -7    1.88    0.09
  -3  -4  -7    2.13    0.13
   3   4   7    2.07    0.08
   3   4   7    1.98    0.08
  -2  -4  -8   32.83    0.80
  -2  -4  -8   31.34    0.80
   2   4   8   31.95    0.79
   2   4   8   32.60    0.79
  -1  -4  -9    0.95    0.08
  -1  -4  -9    0.83    0.07
  -1  -4  -9    0.92    0.07
   1   4   9    1.04    0.07
   1   4   9    1.07    0.07
   0  -4 -10    1.13    0.08
   0  -4 -10    1.23    0.08
   0   4  10    1.10    0.08
   0   4  10    1.23    0.07
   1  -4 -11   14.29    0.38
   1  -4 -11   14.39    0.37
  -1   4  11   13.90    0.37
  -1   4  11   14.67    0.38
   2  -4 -12   12.47    0.33
  -2   4  12   11.78    0.33
  -2   4  12   12.70    0.33
   3  -4 -13    1.60    0.09
   3  -4 -13    1.57    0.10
  -3   4  13    1.60    0.09
   4  -4 -14    6.16    0.19
   4  -4 -14    6.08    0.20
  -4   4  14    6.05    0.20
   5  -4 -15   11.15    0.32
   5  -4 -15   10.95    0.30
  -5   4  15   10.73    0.32
   6  -4 -16    5.73    0.21
   6  -4 -16    5.74    0.18
  -6   4  16    5.55    0.21
   7  -4 -17   29.49    0.78
   7  -4 -17   30.31    0.75
  -7   4  17   27.96    0.78
   8  -4 -18    0.86    0.08
   8  -4 -18    0.98    0.13
  -8   4  18    1.13    0.13
   9  -4 -19    0.93    0.14
  -9   4  19    1.24    0.14
  10  -4 -20    0.81    0.15
 -10   4  20    1.18    0.14
 -13  -3   2    2.75    0.17
  13   3  -2    2.74    0.15
 -12  -3   1    9.02    0.29
  12   3  -1    8.78    0.28
 -11  -3   0    1.42    0.11
  11   3   0    1.50    0.12
 -10  -3  -1    8.13    0.26
  10   3   1    8.33    0.26
  -9  -3  -2    0.45    0.08
   9   3   2    0.65    0.08
  -8  -3  -3    3.82    0.14
   8   3   3    4.00    0.15
  -7  -3  -4   13.65    0.36
   7   3   4   12.19    0.34
   7   3   4   13.08    0.35
  -6  -3  -5   11.94    0.32
   6   3   5   11.77    0.31
   6   3   5   11.09    0.31
  -5  -3  -6   25.35    0.66
   5   3   6   25.96    0.65
   5   3   6   26.86    0.66
  -4  -3  -7   23.89    0.59
   4   3   7   22.47    0.59
   4   3   7   23.92    0.59
  -3  -3  -8   94.47    2.39
  -3  -3  -8   97.29    2.38
   3   3   8  101.46    2.38
   3   3   8   98.21    2.38
  -2  -3  -9   14.64    0.38
  -2  -3  -9   14.70    0.37
  -2  -3  -9   13.40    0.37
   2   3   9   14.57    0.37
   2   3   9   14.76    0.37
  -1  -3 -10    2.96    0.11
  -1  -3 -10    3.02    0.11
   1   3  10    3.10    0.12
   1   3  10    3.06    0.11
   1   3  10    2.95    0.11
   0  -3 -11   24.53    0.60
   0  -3 -11   23.75    0.59
   0   3  11   23.21    0.59
   0   3  11   23.06    0.59
   1  -3 -12   18.24    0.48
   1  -3 -12   18.84    0.47
  -1   3  12   17.81    0.48
  -1   3  12   18.93    0.48
  -1   3  12   18.55    0.47
   2  -3 -13   24.91    0.64
   2  -3 -13   25.19    0.63
  -2   3  13   25.33    0.64
   3  -3 -14   31.75    0.81
   3  -3 -14   32.11    0.80
  -3   3  14   32.55    0.82
   4  -3 -15    3.99    0.15
   4  -3 -15    3.95    0.13
  -4   3  15    3.91    0.15
   5  -3 -16    0.68    0.10
  -5   3  16    0.54    0.10
   6  -3 -17    1.03    0.12
   6  -3 -17    1.28    0.09
  -6   3  17    1.19    0.12
   7  -3 -18    0.02    0.04
  -7   3  18    0.22    0.08
   8  -3 -19    1.48    0.14
  -8   3  19    1.18    0.13
   9  -3 -20    2.26    0.16
  -9   3  20    2.01    0.15
  10  -3 -21   -0.02    0.08
 -10   3  21   -0.11    0.08
 -13  -2   1    9.55    0.31
  13   2  -1    9.31    0.30
 -12  -2   0   10.82    0.34
  12   2   0   11.19    0.34
 -11  -2  -1    0.29    0.07
  11   2   1    0.23    0.07
 -10  -2  -2   20.35    0.55
  10   2   2   19.85    0.54
  -9  -2  -3    6.78    0.22
   9   2   3    7.00    0.23
  -8  -2  -4   22.44    0.58
   8   2   4   22.02    0.58
  -7  -2  -5    9.72    0.28
   7   2   5    9.78    0.28
  -6  -2  -6   34.71    0.87
   6   2   6   35.44    0.86
   6   2   6   33.05    0.86
  -5  -2  -7    7.46    0.22
   5   2   7    7.11    0.21
   5   2   7    7.51    0.22
  -4  -2  -8   71.87    1.71
   4   2   8   68.48    1.71
   4   2   8   69.14    1.71
  -3  -2  -9   77.66    1.92
   3   2   9   79.03    1.91
  -2  -2 -10    0.21    0.05
   2   2  10    0.20    0.04
   2   2  10    0.20    0.07
   2   2  10    0.24    0.04
  -1  -2 -11   20.21    0.52
  -1  -2 -11   20.19    0.51
   1   2  11   19.92    0.51
   1   2  11   20.50    0.51
   0  -2 -12    1.03    0.07
   0  -2 -12    1.05    0.09
   0   2  12    1.02    0.07
   0   2  12    1.10    0.11
   0   2  12    1.09    0.09
   1  -2 -13    4.89    0.17
   1  -2 -13    4.78    0.14
  -1   2  13    4.74    0.15
  -1   2  13    4.57    0.17
  -1   2  13    4.69    0.17
   2  -2 -14   12.45    0.32
   2  -2 -14   12.46    0.34
  -2   2  14   12.17    0.34
   3  -2 -15   11.12    0.28
   3  -2 -15   11.11    0.31
  -3   2  15   10.62    0.31
   4  -2 -16   25.97    0.68
   4  -2 -16   26.37    0.65
  -4   2  16   26.47    0.68
   5  -2 -17    4.19    0.13
   5  -2 -17    4.26    0.17
  -5   2  17    4.25    0.17
   6  -2 -18   22.79    0.61
   6  -2 -18   22.51    0.57
  -6   2  18   22.32    0.61
   7  -2 -19    8.31    0.28
  -7   2  19    8.07    0.28
   8  -2 -20    0.39    0.08
  -8   2  20    0.38    0.08
   9  -2 -21    7.04    0.26
  -9   2  21    7.24    0.26
  10  -2 -22    2.52    0.17
 -10   2  22    2.68    0.17
 -14  -1   1    5.39    0.23
  14   1  -1    5.71    0.22
 -13  -1   0    0.49    0.09
  13   1   0    0.74    0.12
 -12  -1  -1   22.41    0.62
  12   1   1   22.59    0.62
 -11  -1  -2    1.09    0.11
  11   1   2    1.05    0.12
 -10  -1  -3    9.55    0.30
  10   1   3    9.55    0.30
  -9  -1  -4   17.42    0.48
   9   1   4   17.26    0.47
  -8  -1  -5   25.33    0.66
   8   1   5   25.60    0.66
  -7  -1  -6    0.45    0.07
   7   1   6    0.30    0.06
  -6  -1  -7   10.96    0.30
   6   1   7   10.73    0.30
  -5  -1  -8   92.71    2.25
  -5  -1  -8   93.17    2.23
   5   1   8   89.53    2.24
   5   1   8   91.51    2.24
  -4  -1  -9   32.43    0.84
   4   1   9   31.94    0.82
   4   1   9   34.26    0.83
  -3  -1 -10    0.45    0.09
   3   1  10    0.36    0.07
   3   1  10    0.34    0.06
  -2  -1 -11   86.79    2.13
   2   1  11   85.38    2.12
   2   1  11   85.79    2.12
   2   1  11   89.74    2.13
  -1  -1 -12    0.37    0.07
   1   1  12    0.41    0.09
   1   1  12    0.37    0.06
   1   1  12    0.37    0.07
   0  -1 -13   13.98    0.38
   0   1  13   14.29    0.38
   0   1  13   13.50    0.35
   1  -1 -14   66.05    1.61
   1  -1 -14   65.94    1.63
  -1   1  14   66.40    1.61
  -1   1  14   65.73    1.63
   2  -1 -15    0.44    0.08
   2  -1 -15    0.30    0.04
  -2   1  15    0.38    0.08
   3  -1 -16   15.91    0.39
   3  -1 -16   15.60    0.43
  -3   1  16   15.78    0.43
   4  -1 -17   39.37    0.99
   4  -1 -17   41.41    1.02
  -4   1  17   40.25    1.02
   5  -1 -18    7.20    0.24
   5  -1 -18    6.97    0.19
  -5   1  18    7.07    0.23
   6  -1 -19    4.06    0.14
   6  -1 -19    4.26    0.18
  -6   1  19    4.17    0.18
   7  -1 -20    5.39    0.22
  -7   1  20    5.43    0.22
   8  -1 -21    0.07    0.07
  -8   1  21   -0.04    0.07
   9  -1 -22   -0.04    0.08
  -9   1  22    0.08    0.09
  10  -1 -23    5.14    0.18
 -10   1  23    3.92    0.19
 -14   0   0    0.89    0.13
  14   0   0    0.83    0.14
 -13   0  -1    0.40    0.09
  13   0   1    0.27    0.09
 -12   0  -2   11.00    0.34
  12   0   2   10.89    0.35
  11   0   3    0.67    0.12
 -10   0  -4    6.88    0.23
  10   0   4    6.76    0.23
  -9   0  -5    0.46    0.09
   9   0   5    0.48    0.08
  -8   0  -6    1.84    0.11
   8   0   6    2.11    0.13
  -7   0  -7    0.00    0.04
   7   0   7    0.00    0.05
  -6   0  -8   12.87    0.36
   6   0   8   13.54    0.36
  -5   0  -9    5.95    0.17
  -5   0  -9    6.00    0.19
   5   0   9    5.93    0.19
  -4   0 -10    5.57    0.19
   4   0  10    5.93    0.19
  -3   0 -11    1.23    0.10
   3   0  11    1.29    0.10
  -2   0 -12   48.87    1.18
   2   0  12   45.89    1.17
   2   0  12   47.89    1.18
  -1   0 -13    1.15    0.09
   1   0  13    1.14    0.06
   1   0  13    1.17    0.10
   0   0 -14   65.49    1.57
   0   0  14   63.04    1.57
   0   0  14   61.94    1.54
   1   0 -15    2.28    0.12
  -1   0  15    2.37    0.12
  -1   0  15    2.32    0.08
   2   0 -16    0.02    0.05
  -2   0  16    0.00    0.06
   3   0 -17    0.03    0.05
  -3   0  17    0.02    0.05
   4   0 -18   41.18    1.01
   4   0 -18   40.62    1.05
  -4   0  18   42.94    1.06
   5   0 -19    0.10    0.07
  -5   0  19    0.04    0.07
   6   0 -20    0.55    0.10
   7   0 -21    0.04    0.07
  -7   0  21    0.10    0.08
   8   0 -22    3.12    0.17
  -8   0  22    3.06    0.17
   9   0 -23    0.11    0.08
  -9   0  23    0.03    0.09
 -13   1  -2    0.24    0.08
  13  -1   2    0.04    0.08
 -12   1  -3   14.09    0.41
  12  -1   3   13.29    0.41
 -11   1  -4    1.88    0.13
  11  -1   4    1.51    0.15
 -10   1  -5   17.36    0.49
  -9   1  -6   22.25    0.61
   9  -1   6   23.15    0.61
  -8   1  -7    2.56    0.13
   8  -1   7    2.68    0.14
  -7   1  -8    1.20    0.09
   7  -1   8    1.13    0.10
  -6   1  -9    0.88    0.07
  -6   1  -9    0.86    0.08
   6  -1   9    1.17    0.10
  -5   1 -10    0.65    0.08
   5  -1  10    0.69    0.09
  -4   1 -11   53.32    1.30
   4  -1  11   51.12    1.30
  -3   1 -12    0.08    0.04
   3  -1  12    0.08    0.06
  -2   1 -13    3.34    0.13
   2  -1  13    3.16    0.14
  -1   1 -14   13.15    0.35
   1  -1  14   12.73    0.35
   1  -1  14   12.28    0.32
   0   1 -15    0.98    0.08
   0  -1  15    0.95    0.05
   0  -1  15    1.00    0.10
   1   1 -16    0.38    0.09
  -1  -1  16    0.44    0.09
  -1  -1  16    0.37    0.03
   2   1 -17    1.22    0.10
  -2  -1  17    1.21    0.10
   3   1 -18    6.92    0.22
  -3  -1  18    6.65    0.23
   4   1 -19    1.89    0.13
  -4  -1  19    1.80    0.12
   5   1 -20    1.09    0.12
  -5  -1  20    1.07    0.13
   6   1 -21    4.61    0.19
  -6  -1  21    4.17    0.20
   7   1 -22    0.07    0.07
  -7  -1  22    0.19    0.08
   8   1 -23    0.45    0.09
  -8  -1  23    0.43    0.09
   9   1 -24   -0.05    0.09
  -9  -1  24    0.04    0.09
 -13   2  -3    0.62    0.12
  13  -2   3    0.43    0.09
 -12   2  -4    8.58    0.29
  12  -2   4    8.77    0.30
 -11   2  -5    0.98    0.12
  11  -2   5    0.75    0.13
  10  -2   6   45.34    1.16
  -9   2  -7   25.11    0.66
   9  -2   7   24.57    0.66
  -8   2  -8    1.57    0.11
   8  -2   8    1.56    0.12
  -7   2  -9    1.29    0.09
   7  -2   9    1.16    0.11
  -6   2 -10    1.51    0.09
  -6   2 -10    1.47    0.10
   6  -2  10    1.48    0.11
  -5   2 -11    2.56    0.12
   5  -2  11    2.78    0.13
  -4   2 -12   34.63    0.88
   4  -2  12   34.97    0.88
  -3   2 -13    0.46    0.07
   3  -2  13    0.41    0.09
  -2   2 -14    1.65    0.09
   2  -2  14    1.84    0.11
  -1   2 -15    5.83    0.18
   1  -2  15    5.78    0.20
   0   2 -16    0.26    0.05
   0  -2  16    0.30    0.03
   0  -2  16    0.22    0.06
   1   2 -17    1.27    0.08
  -1  -2  17    1.09    0.10
   2   2 -18    8.11    0.25
  -2  -2  18    8.24    0.26
   3   2 -19    0.66    0.10
  -3  -2  19    0.65    0.11
   4   2 -20    1.18    0.12
  -4  -2  20    1.27    0.13
   5   2 -21    1.25    0.12
  -5  -2  21    1.24    0.13
   6   2 -22    0.94    0.12
  -6  -2  22    0.94    0.13
   7   2 -23    0.34    0.08
  -7  -2  23    0.17    0.08
   8   2 -24    1.57    0.16
  -8  -2  24    1.64    0.15
 -13   3  -4    0.18    0.08
  13  -3   4    0.07    0.08
 -12   3  -5    0.35    0.07
  12  -3   5    0.23    0.08
 -11   3  -6    3.98    0.18
  11  -3   6    3.84    0.19
 -10   3  -7    0.06    0.07
  10  -3   7   -0.07    0.08
  -9   3  -8    2.19    0.13
   9  -3   8    1.98    0.14
  -8   3  -9   10.41    0.32
   8  -3   9   10.80    0.32
  -7   3 -10   18.40    0.50
  -7   3 -10   18.40    0.48
   7  -3  10   18.91    0.51
  -6   3 -11   10.41    0.30
  -6   3 -11   10.36    0.29
   6  -3  11   10.11    0.31
  -5   3 -12    0.08    0.05
   5  -3  12    0.03    0.06
  -4   3 -13    0.02    0.04
   4  -3  13    0.06    0.06
  -3   3 -14    5.93    0.19
   3  -3  14    5.87    0.20
  -2   3 -15    7.65    0.23
   2  -3  15    7.48    0.24
  -1   3 -16    0.22    0.05
   1  -3  16    0.27    0.06
   0   3 -17   12.03    0.34
   0  -3  17   12.33    0.35
   0  -3  17   11.88    0.30
   1   3 -18    5.64    0.19
  -1  -3  18    5.68    0.20
   2   3 -19    0.79    0.08
  -2  -3  19    1.01    0.11
   3   3 -20    0.48    0.11
  -3  -3  20    0.54    0.11
   4   3 -21    4.38    0.21
  -4  -3  21    5.02    0.20
   5   3 -22    0.86    0.11
  -5  -3  22    0.53    0.12
   6   3 -23    0.33    0.08
  -6  -3  23    0.41    0.09
   7   3 -24    0.29    0.07
  -7  -3  24    0.26    0.08
   8   3 -25    0.37    0.09
  -8  -3  25    0.28    0.09
 -13   4  -5    0.19    0.08
  13  -4   5    0.18    0.09
 -12   4  -6    0.21    0.07
  12  -4   6    0.25    0.09
 -11   4  -7   24.83    0.68
  11  -4   7   25.04    0.68
 -10   4  -8    5.60    0.21
  10  -4   8    5.76    0.23
  -9   4  -9   24.67    0.69
  -8   4 -10   13.29    0.39
   8  -4  10   13.70    0.40
  -7   4 -11    0.70    0.09
  -7   4 -11    0.61    0.09
   7  -4  11    0.73    0.12
  -6   4 -12    2.46    0.12
  -6   4 -12    2.53    0.12
   6  -4  12    2.41    0.13
  -5   4 -13    0.49    0.08
   5  -4  13    0.53    0.10
  -4   4 -14    7.06    0.22
   4  -4  14    6.84    0.23
  -3   4 -15    1.38    0.09
   3  -4  15    1.33    0.11
  -2   4 -16   10.30    0.30
   2  -4  16   10.25    0.30
  -1   4 -17    0.57    0.07
   1  -4  17    0.71    0.10
   0   4 -18    4.17    0.15
   0  -4  18    4.07    0.17
   1   4 -19    3.38    0.14
  -1  -4  19    3.29    0.16
   2   4 -20    5.50    0.19
  -2  -4  20    5.46    0.21
   3   4 -21    5.85    0.20
  -3  -4  21    5.97    0.22
  -4  -4  22    0.72    0.14
   5   4 -23    0.08    0.07
  -5  -4  23    0.01    0.08
   6   4 -24    0.10    0.07
  -6  -4  24    0.02    0.08
   7   4 -25    0.16    0.08
  -7  -4  25    0.09    0.09
 -13   5  -6    0.19    0.07
 -12   5  -7    4.42    0.19
  12  -5   7    4.37    0.21
 -11   5  -8    1.04    0.11
  11  -5   8    0.74    0.14
 -10   5  -9    4.55    0.19
  10  -5   9    4.64    0.20
  -9   5 -10    9.78    0.31
   9  -5  10    9.86    0.32
   8  -5  11    1.30    0.13
  -7   5 -12    9.25    0.28
  -7   5 -12    9.14    0.27
   7  -5  12    8.69    0.29
  -6   5 -13    6.28    0.21
  -6   5 -13    6.21    0.21
   6  -5  13    5.96    0.22
  -5   5 -14    1.52    0.10
   5  -5  14    1.68    0.13
  -4   5 -15   10.90    0.32
   4  -5  15   11.12    0.33
  -3   5 -16    2.11    0.11
   3  -5  16    2.27    0.14
  -2   5 -17   33.91    0.87
   2  -5  17   34.53    0.88
  -1   5 -18   23.11    0.61
   1  -5  18   23.21    0.62
   0   5 -19    8.35    0.25
   0  -5  19    8.35    0.22
   0  -5  19    8.19    0.27
   1   5 -20   11.90    0.34
  -1  -5  20   12.02    0.36
   2   5 -21    7.11    0.23
  -2  -5  21    6.98    0.26
   3   5 -22    0.05    0.05
  -3  -5  22    0.04    0.07
   4   5 -23    2.04    0.11
  -4  -5  23    1.84    0.15
   5   5 -24    0.09    0.05
  -5  -5  24    0.08    0.08
  -6  -5  25    0.21    0.08
  -7  -5  26   -0.09    0.09
 -12   6  -8    3.16    0.17
  12  -6   8    3.32    0.20
 -11   6  -9    7.08    0.26
  11  -6   9    7.62    0.28
 -10   6 -10    0.06    0.06
  10  -6  10    0.08    0.08
  -9   6 -11    9.12    0.29
   9  -6  11    9.43    0.31
  -8   6 -12    0.61    0.10
   8  -6  12    0.68    0.13
  -7   6 -13    0.43    0.08
   7  -6  13    0.28    0.09
  -6   6 -14   22.69    0.60
  -6   6 -14   22.18    0.60
   6  -6  14   22.53    0.61
  -5   6 -15    0.29    0.07
   5  -6  15    0.33    0.08
  -4   6 -16   20.29    0.56
   4  -6  16   21.40    0.57
  -3   6 -17   12.71    0.37
   3  -6  17   13.28    0.38
  -2   6 -18    0.10    0.05
   2  -6  18    0.07    0.08
  -1   6 -19   10.43    0.31
   1  -6  19   10.79    0.33
   0   6 -20    0.75    0.08
   0  -6  20    0.58    0.12
   1   6 -21    4.72    0.17
  -1  -6  21    4.54    0.20
   2   6 -22    0.47    0.08
  -2  -6  22    0.69    0.12
   3   6 -23    0.05    0.05
  -3  -6  23    0.08    0.09
   4   6 -24    6.24    0.21
  -4  -6  24    6.32    0.24
   5   6 -25    0.31    0.06
  -5  -6  25    0.35    0.08
   6   6 -26    0.08    0.06
  -6  -6  26   -0.11    0.09
 -11   7 -10    0.40    0.08
  11  -7  10    0.30    0.10
 -10   7 -11    0.10    0.06
  10  -7  11    0.24    0.09
  -9   7 -12    2.79    0.14
   9  -7  12    2.61    0.17
  -8   7 -13    0.20    0.06
   8  -7  13    0.25    0.09
  -7   7 -14    0.68    0.10
  -7   7 -14    0.64    0.09
  -6   7 -15    6.23    0.21
  -6   7 -15    6.25    0.22
   6  -7  15    5.87    0.23
   5  -7  16    4.30    0.19
  -4   7 -17    1.41    0.10
  -3   7 -18   29.89    0.78
   3  -7  18   29.97    0.79
  -2   7 -19    0.74    0.08
   2  -7  19    0.58    0.12
  -1   7 -20    1.12    0.09
   1  -7  20    0.90    0.13
   0   7 -21    0.43    0.10
   0  -7  21    0.43    0.09
   1   7 -22    1.74    0.11
  -1  -7  22    1.91    0.14
   2   7 -23    3.63    0.15
   3   7 -24    0.80    0.09
  -3  -7  24    1.02    0.13
   4   7 -25    4.74    0.18
  -4  -7  25    5.05    0.22
   5   7 -26    0.34    0.06
  -5  -7  26    0.32    0.09
 -11   8 -11    0.19    0.08
  11  -8  11    0.27    0.10
 -10   8 -12    1.57    0.12
  10  -8  12    1.59    0.16
  -9   8 -13    0.82    0.11
   9  -8  13    0.82    0.14
  -8   8 -14    0.40    0.07
   8  -8  14    0.50    0.09
  -7   8 -15    0.28    0.07
  -7   8 -15    0.36    0.08
   7  -8  15    0.33    0.09
  -6   8 -16    7.13    0.25
  -6   8 -16    7.13    0.23
   6  -8  16    6.83    0.26
  -5   8 -17    1.25    0.13
  -5   8 -17    1.18    0.10
   5  -8  17    1.12    0.17
  -4   8 -18   15.91    0.44
   4  -8  18   15.63    0.46
  -3   8 -19    0.98    0.10
   3  -8  19    0.85    0.13
  -2   8 -20    6.71    0.22
   2  -8  20    7.08    0.25
  -1   8 -21    0.06    0.05
   1  -8  21    0.18    0.07
   0   8 -22    0.06    0.05
   1   8 -23    0.14    0.05
  -1  -8  23    0.03    0.08
   2   8 -24    4.43    0.16
  -2  -8  24    3.91    0.20
   3   8 -25    4.00    0.15
  -3  -8  25    3.32    0.19
   4   8 -26    0.89    0.10
  -4  -8  26    0.70    0.15
 -10   9 -13    0.17    0.08
  10  -9  13    0.13    0.10
  -9   9 -14    0.02    0.07
   9  -9  14    0.17    0.09
  -8   9 -15    2.20    0.12
   8  -9  15    1.91    0.16
  -7   9 -16    0.33    0.09
  -7   9 -16    0.38    0.07
   7  -9  16    0.41    0.10
  -6   9 -17    0.17    0.08
  -6   9 -17    0.18    0.06
   6  -9  17    0.24    0.08
  -5   9 -18    1.46    0.13
  -5   9 -18    1.46    0.10
   5  -9  18    1.43    0.14
  -4   9 -19    0.14    0.06
   4  -9  19    0.27    0.09
  -3   9 -20    7.67    0.24
   3  -9  20    6.72    0.29
  -2   9 -21    0.11    0.05
   2  -9  21   -0.01    0.11
  -1   9 -22    1.08    0.09
   1  -9  22    1.24    0.14
   0   9 -23    0.16    0.05
   0  -9  23    0.10    0.09
   1   9 -24    0.01    0.06
  -1  -9  24    0.14    0.08
   2   9 -25    0.21    0.06
  -2  -9  25    0.27    0.09
   3   9 -26    0.60    0.10
  -3  -9  26    0.52    0.10
  -8  10 -16    0.01    0.07
   8 -10  16    0.02    0.09
  -7  10 -17    0.00    0.06
  -7  10 -17    0.13    0.09
   7 -10  17   -0.07    0.09
  -6  10 -18    0.04    0.06
  -6  10 -18   -0.10    0.08
   6 -10  18   -0.01    0.09
  -5  10 -19    0.95    0.10
  -5  10 -19    0.98    0.13
   5 -10  19    0.94    0.14
  -4  10 -20    0.45    0.09
   4 -10  20    0.47    0.09
  -3  10 -21    6.23    0.21
   3 -10  21    6.16    0.24
  -2  10 -22    3.93    0.15
   2 -10  22    4.13    0.21
  -1  10 -23    0.40    0.08
   1 -10  23    0.42    0.09
   0  10 -24    0.78    0.09
   0 -10  24    0.90    0.14
   1  10 -25    0.14    0.06
  -1 -10  25    0.18    0.09
  -6  11 -19    0.10    0.06
  -6  11 -19    0.23    0.10
   6 -11  19    0.33    0.09
  -5  11 -20    6.61    0.23
  -5  11 -20    6.67    0.26
   5 -11  20    6.97    0.27
  -4  11 -21    2.63    0.17
  -4  11 -21    2.43    0.14
   4 -11  21    2.67    0.17
  -3  11 -22    2.74    0.14
   3 -11  22    2.46    0.16
  -2  11 -23   -0.03    0.06
   2 -11  23    0.24    0.08
  -1 -17   2    1.44    0.14
   0 -17   1    4.50    0.20
   1 -17   0    0.62    0.12
   2 -17  -1    6.15    0.25
  -4 -16   4    1.23    0.14
  -3 -16   3    2.45    0.15
  -2 -16   2    0.61    0.09
  -1 -16   1    0.66    0.09
   0 -16   0    5.85    0.22
   1 -16  -1    1.06    0.13
   2 -16  -2    0.89    0.13
   3 -16  -3    2.38    0.16
   4 -16  -4    0.94    0.12
  -6 -15   5    2.57    0.14
  -5 -15   4    1.36    0.13
  -4 -15   3    0.95    0.12
  -3 -15   2    0.04    0.07
  -2 -15   1   11.50    0.35
  -1 -15   0    1.52    0.14
   0 -15  -1    9.99    0.32
   1 -15  -2    0.41    0.08
   2 -15  -3    3.26    0.17
   3 -15  -4    1.68    0.14
   4 -15  -5    1.49    0.14
   5 -15  -6    3.36    0.18
   6 -15  -7    0.36    0.10
  -6 -14   4    1.26    0.12
  -5 -14   3    4.26    0.18
  -4 -14   2    2.23    0.14
  -3 -14   1    0.08    0.07
  -2 -14   0    2.15    0.14
  -1 -14  -1    2.85    0.16
   0 -14  -2   11.88    0.36
   1 -14  -3    2.36    0.14
   2 -14  -4   12.56    0.38
   3 -14  -5    2.04    0.15
   4 -14  -6    1.18    0.14
   5 -14  -7   -0.06    0.07
   6 -14  -8    4.74    0.22
   7 -14  -9    0.07    0.08
  -6 -13   3   10.59    0.32
  -3 -13   0    1.37    0.12
  -2 -13  -1   -0.10    0.07
  -1 -13  -2    2.17    0.14
   1 -13  -4    6.61    0.27
   2 -13  -5   14.03    0.41
   3 -13  -6   12.58    0.38
   4 -13  -7    7.97    0.28
   5 -13  -8    2.14    0.15
   6 -13  -9    0.65    0.13
   7 -13 -10    1.33    0.15
   8 -13 -11    3.10    0.18
  -6 -12   2    0.47    0.09
  -5 -12   1    3.44    0.16
  -4 -12   0   28.44    0.74
  -3 -12  -1   15.24    0.43
  -2 -12  -2    1.05    0.12
  -1 -12  -3    0.14    0.07
   0 -12  -4    2.30    0.13
   1 -12  -5    1.03    0.11
   2 -12  -6    1.35    0.12
   4 -12  -8    1.22    0.13
   5 -12  -9    1.97    0.14
   6 -12 -10    1.31    0.14
   7 -12 -11    1.29    0.13
   8 -12 -12    0.29    0.09
  -6 -11   1    0.23    0.07
   6  11  -1    0.20    0.04
  -5 -11   0   12.77    0.37
  -4 -11  -1    0.27    0.07
  -3 -11  -2    8.68    0.27
  -2 -11  -3    0.69    0.10
  -1 -11  -4    3.82    0.16
  -1 -11  -4    3.57    0.10
  -1 -11  -4    3.77    0.11
   0 -11  -5    3.33    0.15
   0 -11  -5    2.53    0.09
   1 -11  -6   17.54    0.45
   1 -11  -6   17.93    0.49
   2 -11  -7    0.20    0.04
   2 -11  -7    0.18    0.06
   3 -11  -8   18.85    0.51
   3 -11  -8   18.51    0.49
   4 -11  -9   16.93    0.45
   4 -11  -9   16.95    0.48
   5 -11 -10    5.73    0.23
   5 -11 -10    5.91    0.20
  -5  11  10    6.04    0.17
   6 -11 -11    1.26    0.13
   6 -11 -11    1.10    0.11
  -6  11  11    1.09    0.07
   7 -11 -12    1.16    0.12
   7 -11 -12    1.02    0.13
  -7  11  12    1.22    0.09
   8 -11 -13    2.96    0.16
   8 -11 -13    2.73    0.16
  -8  11  13    2.89    0.13
   9 -11 -14    0.45    0.09
   9 -11 -14    0.46    0.09
  -9  11  14    0.51    0.11
  -6 -10   0   11.08    0.32
   6  10   0   10.72    0.29
  -5 -10  -1    0.08    0.07
  -4 -10  -2    1.39    0.11
  -4 -10  -2    1.48    0.06
  -3 -10  -3    0.47    0.09
  -2 -10  -4   10.99    0.32
  -1 -10  -5    1.23    0.05
  -1 -10  -5    1.37    0.11
  -1 -10  -5    1.24    0.05
   0 -10  -6    3.88    0.12
   0 -10  -6    3.97    0.15
   1 -10  -7    8.46    0.25
   1 -10  -7    8.04    0.22
   2 -10  -8    0.28    0.07
   2 -10  -8    0.50    0.06
   3 -10  -9    0.16    0.06
   3 -10  -9    0.07    0.06
  -3  10   9    0.09    0.02
   4 -10 -10   14.62    0.40
   4 -10 -10   14.20    0.41
  -4  10  10   14.68    0.37
   5 -10 -11    0.42    0.08
   5 -10 -11    0.32    0.08
  -5  10  11    0.29    0.05
   6 -10 -12    4.62    0.19
  -6  10  12    4.89    0.16
   7 -10 -13    0.73    0.12
   7 -10 -13    1.02    0.12
   8 -10 -14    0.32    0.08
   8 -10 -14    0.36    0.08
  -8  10  14    0.31    0.07
   9 -10 -15    1.50    0.14
   9 -10 -15    1.53    0.15
  -9  10  15    1.41    0.13
  -7  -9   0    2.96    0.13
  -6  -9  -1   11.69    0.31
  -5  -9  -2    0.02    0.06
  -5  -9  -2   -0.01    0.03
  -4  -9  -3    2.16    0.07
  -4  -9  -3    2.23    0.12
  -3  -9  -4    1.92    0.11
  -3  -9  -4    1.96    0.06
  -2  -9  -5    6.11    0.16
  -2  -9  -5    6.27    0.20
  -1  -9  -6    0.18    0.05
  -1  -9  -6    0.19    0.04
   0  -9  -7    2.81    0.09
   0  -9  -7    2.89    0.13
   1  -9  -8    8.28    0.23
   1  -9  -8    8.24    0.25
   2  -9  -9    0.46    0.09
   2  -9  -9    0.46    0.07
   3  -9 -10   16.27    0.44
   3  -9 -10   16.54    0.45
  -3   9  10   16.30    0.42
  -3   9  10   16.42    0.42
   4  -9 -11    1.04    0.09
   4  -9 -11    0.86    0.10
  -4   9  11    1.04    0.07
   5  -9 -12    2.09    0.13
   5  -9 -12    1.95    0.13
  -5   9  12    2.02    0.10
   6  -9 -13   23.05    0.62
   6  -9 -13   22.75    0.62
  -6   9  13   23.26    0.60
   7  -9 -14    2.58    0.16
  -7   9  14    2.34    0.13
   8  -9 -15    1.61    0.14
   8  -9 -15    1.30    0.14
  -8   9  15    1.50    0.11
   9  -9 -16    5.08    0.21
   9  -9 -16    5.22    0.22
  -9   9  16    5.30    0.20
  -9  -8   1    0.12    0.06
  -7  -8  -1   10.60    0.29
  -6  -8  -2   25.36    0.64
  -5  -8  -3    1.68    0.11
  -5  -8  -3    1.60    0.07
  -4  -8  -4    2.51    0.08
  -4  -8  -4    2.42    0.08
  -4  -8  -4    2.52    0.12
  -3  -8  -5   16.49    0.43
  -3  -8  -5   15.71    0.40
  -2  -8  -6    8.57    0.23
  -2  -8  -6    8.37    0.22
  -2  -8  -6    8.75    0.25
  -1  -8  -7   22.64    0.57
  -1  -8  -7   22.82    0.57
  -1  -8  -7   23.43    0.59
   0  -8  -8   18.19    0.48
   0  -8  -8   18.07    0.46
   1  -8  -9    2.21    0.09
   1  -8  -9    2.12    0.11
   2  -8 -10    1.17    0.07
   2  -8 -10    1.12    0.09
  -2   8  10    1.13    0.06
   3  -8 -11    1.09    0.10
  -3   8  11    1.17    0.06
  -3   8  11    1.17    0.07
   4  -8 -12    9.57    0.29
   4  -8 -12    9.84    0.28
  -4   8  12    9.77    0.27
  -4   8  12    9.57    0.28
   5  -8 -13    6.21    0.22
   5  -8 -13    6.13    0.21
  -5   8  13    6.22    0.20
   6  -8 -14   22.76    0.60
   6  -8 -14   22.04    0.60
  -6   8  14   22.80    0.60
   7  -8 -15    9.05    0.30
   7  -8 -15    9.55    0.29
  -7   8  15    9.23    0.29
   8  -8 -16    0.09    0.08
  -8   8  16   -0.06    0.07
   9  -8 -17    0.36    0.10
   9  -8 -17    0.10    0.06
  -9   8  17    0.15    0.08
 -11  -7   2    1.05    0.14
  11   7  -2    0.83    0.08
 -10  -7   1   11.00    0.32
  10   7  -1   10.84    0.29
  -9  -7   0    2.90    0.12
   9   7   0    3.07    0.10
  -8  -7  -1   58.01    1.46
   8   7   1   59.49    1.43
  -7  -7  -2   16.52    0.43
   7   7   2   16.53    0.41
  -6  -7  -3   34.52    0.86
  -5  -7  -4    1.30    0.06
  -5  -7  -4    1.35    0.10
  -4  -7  -5   26.73    0.67
  -4  -7  -5   26.13    0.65
  -4  -7  -5   26.07    0.65
  -3  -7  -6    0.33    0.05
  -3  -7  -6    0.24    0.05
  -3  -7  -6    0.27    0.04
  -2  -7  -7    0.94    0.06
  -2  -7  -7    1.07    0.05
  -2  -7  -7    1.05    0.06
  -2  -7  -7    1.05    0.09
  -1  -7  -8    0.61    0.05
  -1  -7  -8    0.55    0.05
  -1  -7  -8    0.53    0.07
   0  -7  -9    5.07    0.15
   0  -7  -9    5.31    0.17
   1  -7 -10    5.16    0.16
   1  -7 -10    5.00    0.17
  -1   7  10    5.10    0.14
  -1   7  10    5.12    0.14
   2  -7 -11    1.89    0.10
   2  -7 -11    1.97    0.10
  -2   7  11    1.84    0.08
  -2   7  11    2.08    0.09
   3  -7 -12    0.72    0.09
   3  -7 -12    0.64    0.08
  -3   7  12    0.65    0.07
  -3   7  12    0.57    0.06
   4  -7 -13   10.63    0.30
   4  -7 -13   10.27    0.30
  -4   7  13   10.55    0.29
  -4   7  13    9.67    0.29
   5  -7 -14    2.98    0.14
   5  -7 -14    2.91    0.14
  -5   7  14    3.01    0.14
   6  -7 -15    1.05    0.10
   6  -7 -15    1.12    0.13
  -6   7  15    1.18    0.11
   7  -7 -16    0.75    0.12
   7  -7 -16    0.79    0.10
  -7   7  16    0.81    0.11
   8  -7 -17    0.25    0.08
   8  -7 -17    0.16    0.06
  -8   7  17    0.16    0.07
   9  -7 -18    0.45    0.08
   9  -7 -18    0.66    0.15
  -9   7  18    0.67    0.12
  10  -7 -19    0.66    0.15
 -10   7  19    0.73    0.12
  13   6  -3   -0.02    0.06
 -12  -6   2    3.58    0.18
  12   6  -2    3.25    0.14
 -11  -6   1    8.30    0.26
  11   6  -1    8.20    0.24
 -10  -6   0    0.11    0.05
  10   6   0    0.14    0.04
  -9  -6  -1   17.19    0.46
   9   6   1   16.88    0.44
  -8  -6  -2   12.21    0.34
   8   6   2   12.38    0.32
  -7  -6  -3   14.45    0.39
   7   6   3   14.56    0.37
   7   6   3   15.17    0.38
  -6  -6  -4    6.82    0.20
   6   6   4    6.92    0.18
  -5  -6  -5    2.36    0.09
  -4  -6  -6   14.40    0.39
  -4  -6  -6   14.61    0.37
  -3  -6  -7    9.29    0.25
  -3  -6  -7    9.69    0.25
  -3  -6  -7    9.91    0.25
  -3  -6  -7    9.73    0.27
  -2  -6  -8    8.58    0.24
  -2  -6  -8    8.28    0.22
  -2  -6  -8    7.95    0.22
  -1  -6  -9   34.39    0.88
  -1  -6  -9   35.88    0.90
  -1  -6  -9   35.91    0.90
   1   6   9   36.65    0.87
   1   6   9   36.44    0.87
   0  -6 -10    0.49    0.07
   0  -6 -10    0.31    0.05
   0   6  10    0.34    0.05
   0   6  10    0.43    0.05
   1  -6 -11    4.31    0.14
   1  -6 -11    4.48    0.15
  -1   6  11    4.46    0.14
  -1   6  11    4.37    0.15
   2  -6 -12    1.95    0.10
   2  -6 -12    1.87    0.09
  -2   6  12    1.90    0.09
  -2   6  12    1.67    0.08
   3  -6 -13    1.53    0.09
   3  -6 -13    1.54    0.10
  -3   6  13    1.68    0.09
  -3   6  13    1.48    0.08
   4  -6 -14    0.41    0.08
   4  -6 -14    0.43    0.09
  -4   6  14    0.36    0.06
   5  -6 -15    1.93    0.11
   5  -6 -15    2.23    0.13
  -5   6  15    2.11    0.12
   6  -6 -16    6.13    0.22
   6  -6 -16    5.88    0.20
  -6   6  16    6.18    0.22
   7  -6 -17    3.68    0.15
   7  -6 -17    3.74    0.20
  -7   6  17    3.57    0.17
   8  -6 -18    9.73    0.28
   8  -6 -18    9.43    0.32
  -8   6  18    9.60    0.31
   9  -6 -19    0.09    0.13
   9  -6 -19    0.31    0.09
  -9   6  19    0.25    0.08
  10  -6 -20    1.37    0.17
 -10   6  20    1.71    0.14
 -13  -5   2    0.95    0.12
  13   5  -2    0.69    0.10
  12   5  -1   -0.05    0.06
 -11  -5   0    0.01    0.05
  11   5   0    0.07    0.05
 -10  -5  -1    2.24    0.12
  10   5   1    2.49    0.11
  -9  -5  -2   11.41    0.33
   9   5   2   11.48    0.32
  -8  -5  -3    2.36    0.11
   8   5   3    2.62    0.10
   8   5   3    2.46    0.09
   7   5   4    4.65    0.14
   7   5   4    4.99    0.15
  -6  -5  -5   16.86    0.45
   6   5   5   18.02    0.44
   6   5   5   16.91    0.44
  -5  -5  -6   18.47    0.47
   5   5   6   18.92    0.47
   5   5   6   18.19    0.46
  -4  -5  -7    2.77    0.10
   4   5   7    2.78    0.09
   4   5   7    2.73    0.09
  -3  -5  -8   19.70    0.50
  -3  -5  -8   20.05    0.51
   3   5   8   19.60    0.49
  -2  -5  -9   11.01    0.30
  -2  -5  -9   11.39    0.31
   2   5   9   11.37    0.29
   2   5   9   11.41    0.29
  -1  -5 -10    1.31    0.09
  -1  -5 -10    1.15    0.07
   1   5  10    1.15    0.07
   1   5  10    1.32    0.07
   0  -5 -11    5.62    0.17
   0  -5 -11    5.23    0.16
   0   5  11    5.40    0.16
   0   5  11    5.15    0.17
   1  -5 -12    0.33    0.06
   1  -5 -12    0.36    0.07
  -1   5  12    0.36    0.06
  -1   5  12    0.35    0.07
   2  -5 -13   11.34    0.30
   2  -5 -13   11.55    0.31
  -2   5  13   10.92    0.30
  -2   5  13   10.68    0.30
   3  -5 -14    0.13    0.05
   3  -5 -14    0.23    0.04
  -3   5  14    0.20    0.05
   4  -5 -15    0.61    0.09
   4  -5 -15    0.51    0.07
  -4   5  15    0.45    0.09
   5  -5 -16    0.71    0.11
   5  -5 -16    0.51    0.08
  -5   5  16    0.63    0.10
   6  -5 -17    8.54    0.25
   6  -5 -17    8.24    0.28
  -6   5  17    8.83    0.28
   7  -5 -18    0.09    0.04
  -7   5  18    0.02    0.07
   8  -5 -19    0.06    0.08
   8  -5 -19    0.04    0.05
  -8   5  19    0.14    0.08
   9  -5 -20    0.41    0.09
  -9   5  20    0.34    0.09
  10  -5 -21    2.21    0.17
 -10   5  21    2.18    0.14
 -13  -4   1    4.71    0.20
  13   4  -1    4.63    0.18
  12   4   0    2.81    0.14
 -11  -4  -1    0.90    0.10
  11   4   1    0.78    0.17
 -10  -4  -2    4.45    0.18
  10   4   2    4.76    0.18
  -9  -4  -3    1.67    0.11
   9   4   3    1.71    0.10
  -8  -4  -4    2.75    0.12
   8   4   4    2.93    0.12
   8   4   4    2.70    0.10
  -7  -4  -5   13.67    0.37
   7   4   5   13.72    0.36
   7   4   5   12.78    0.35
  -6  -4  -6    1.88    0.09
   6   4   6    1.84    0.08
   6   4   6    1.61    0.07
  -5  -4  -7    2.07    0.09
   5   4   7    2.13    0.08
   5   4   7    2.11    0.09
  -4  -4  -8   14.70    0.38
   4   4   8   14.35    0.37
   4   4   8   14.22    0.37
  -3  -4  -9    0.89    0.08
  -3  -4  -9    0.94    0.07
   3   4   9    0.92    0.08
   3   4   9    0.81    0.06
  -2  -4 -10   58.84    1.50
   2   4  10   61.57    1.49
   2   4  10   62.19    1.49
  -1  -4 -11    3.27    0.12
  -1  -4 -11    3.37    0.14
   1   4  11    3.37    0.11
   0  -4 -12   13.07    0.34
   0  -4 -12   12.41    0.34
   0   4  12   13.22    0.34
   0   4  12   12.33    0.34
   1  -4 -13    0.70    0.07
  -1   4  13    0.64    0.08
  -1   4  13    0.81    0.08
   2  -4 -14    6.10    0.18
   2  -4 -14    6.04    0.20
  -2   4  14    6.30    0.19
   3  -4 -15    3.49    0.14
  -3   4  15    3.63    0.14
   4  -4 -16    0.84    0.10
   4  -4 -16    1.00    0.08
  -4   4  16    0.94    0.10
   5  -4 -17    1.95    0.09
   5  -4 -17    1.96    0.13
  -5   4  17    1.94    0.14
   6  -4 -18    1.10    0.13
   6  -4 -18    0.89    0.07
  -6   4  18    0.88    0.13
   7  -4 -19    3.92    0.19
   7  -4 -19    4.08    0.14
  -7   4  19    4.07    0.18
   8  -4 -20    0.21    0.08
  -8   4  20    0.12    0.08
   9  -4 -21    8.19    0.30
  -9   4  21    8.61    0.29
 -13  -3   0    1.57    0.13
  13   3   0    1.75    0.12
 -12  -3  -1    0.00    0.07
  12   3   1    0.00    0.06
 -11  -3  -2    1.85    0.12
  11   3   2    1.72    0.12
 -10  -3  -3    0.36    0.07
  10   3   3    0.21    0.07
  -9  -3  -4    2.70    0.13
   9   3   4    2.92    0.13
  -8  -3  -5    0.99    0.09
   8   3   5    0.77    0.09
  -7  -3  -6    1.30    0.08
   7   3   6    1.31    0.09
   7   3   6    1.21    0.06
  -6  -3  -7    3.90    0.14
   6   3   7    3.70    0.13
   6   3   7    4.07    0.14
  -5  -3  -8    3.19    0.13
   5   3   8    3.26    0.12
   5   3   8    3.09    0.11
  -4  -3  -9    1.06    0.08
   4   3   9    1.10    0.08
  -3  -3 -10   26.90    0.68
   3   3  10   26.29    0.67
   3   3  10   27.48    0.68
  -2  -3 -11   12.89    0.34
   2   3  11   11.84    0.33
   2   3  11   13.16    0.34
  -1  -3 -12    4.76    0.16
  -1  -3 -12    4.98    0.15
   1   3  12    5.01    0.16
   1   3  12    4.54    0.15
   0  -3 -13    3.36    0.16
   0  -3 -13    3.85    0.12
   0   3  13    3.92    0.14
   0   3  13    3.61    0.14
   0   3  13    3.94    0.14
   1  -3 -14    3.10    0.13
   1  -3 -14    3.12    0.11
  -1   3  14    3.08    0.13
  -1   3  14    3.02    0.11
   2  -3 -15   14.03    0.37
   2  -3 -15   14.21    0.39
  -2   3  15   14.36    0.38
   3  -3 -16    1.42    0.10
   3  -3 -16    1.26    0.07
  -3   3  16    1.24    0.10
   4  -3 -17    0.01    0.04
   4  -3 -17    0.06    0.06
  -4   3  17    0.01    0.07
   5  -3 -18   13.28    0.38
  -5   3  18   12.94    0.38
   6  -3 -19    3.14    0.12
   6  -3 -19    3.19    0.17
   7  -3 -20    2.90    0.17
  -7   3  20    2.61    0.16
   8  -3 -21    0.77    0.13
  -8   3  21    0.89    0.12
   9  -3 -22    1.04    0.14
  -9   3  22    0.74    0.13
 -13  -2  -1    6.51    0.24
  13   2   1    6.85    0.24
 -12  -2  -2    3.52    0.17
  12   2   2    3.65    0.17
 -11  -2  -3    0.19    0.06
  11   2   3    0.05    0.07
 -10  -2  -4   27.94    0.73
  10   2   4   27.68    0.73
  -9  -2  -5    6.26    0.21
   9   2   5    6.27    0.21
  -8  -2  -6   12.26    0.35
   8   2   6   12.34    0.35
  -7  -2  -7    8.47    0.25
   7   2   7    8.59    0.25
  -6  -2  -8   13.33    0.36
   6   2   8   13.26    0.36
  -5  -2  -9    2.60    0.12
   5   2   9    2.41    0.11
   5   2   9    2.33    0.10
  -4  -2 -10   32.60    0.86
   4   2  10   32.45    0.84
   4   2  10   35.64    0.84
  -3  -2 -11   70.61    1.71
   3   2  11   66.95    1.71
   3   2  11   71.50    1.71
  -2  -2 -12    6.82    0.21
   2   2  12    6.43    0.20
   2   2  12    7.22    0.21
   1   2  13   22.92    0.58
   1   2  13   23.96    0.59
   1   2  13   21.92    0.58
   0  -2 -14   15.19    0.39
   0  -2 -14   15.54    0.41
   0   2  14   14.65    0.39
   0   2  14   15.39    0.41
   1  -2 -15    3.41    0.11
   1  -2 -15    3.36    0.13
  -1   2  15    3.30    0.11
  -1   2  15    3.31    0.14
   2  -2 -16    7.68    0.21
   2  -2 -16    7.49    0.24
  -2   2  16    8.10    0.24
   3  -2 -17    6.63    0.22
   3  -2 -17    6.54    0.18
  -3   2  17    6.68    0.22
   4  -2 -18    1.68    0.11
   4  -2 -18    1.72    0.07
  -4   2  18    1.89    0.13
   5  -2 -19    8.16    0.22
   5  -2 -19    8.50    0.27
  -5   2  19    8.21    0.27
  -6   2  20    0.17    0.08
   7  -2 -21    0.11    0.08
  -7   2  21   -0.02    0.07
   8  -2 -22    0.15    0.07
  -8   2  22   -0.02    0.09
   9  -2 -23    3.56    0.19
  -9   2  23    3.63    0.19
 -13  -1  -2    0.21    0.08
  13   1   2    0.16    0.07
 -12  -1  -3   14.28    0.42
  12   1   3   13.93    0.41
  11   1   4    1.82    0.14
 -10  -1  -5   17.69    0.49
  10   1   5   17.46    0.49
  -9  -1  -6   22.19    0.59
   9   1   6   22.47    0.59
  -8  -1  -7    2.35    0.12
   8   1   7    2.34    0.13
  -7  -1  -8    1.28    0.09
   7   1   8    1.26    0.09
  -6  -1  -9    0.95    0.05
  -6  -1  -9    0.93    0.08
   6   1   9    0.86    0.08
  -5  -1 -10    0.65    0.08
   5   1  10    0.58    0.08
  -4  -1 -11   54.13    1.32
   4   1  11   52.68    1.32
  -3  -1 -12    0.07    0.05
   3   1  12    0.03    0.05
  -2  -1 -13    3.16    0.13
   2   1  13    3.08    0.13
  -1  -1 -14   12.84    0.35
   1   1  14   12.64    0.35
   1   1  14   12.43    0.33
   0  -1 -15    0.76    0.09
   0   1  15    0.99    0.10
   0   1  15    0.91    0.06
   1  -1 -16    0.44    0.08
  -1   1  16    0.50    0.09
  -1   1  16    0.31    0.05
   2  -1 -17    1.24    0.05
   2  -1 -17    1.04    0.09
  -2   1  17    1.08    0.10
   3  -1 -18    6.61    0.18
   3  -1 -18    7.24    0.23
  -3   1  18    7.09    0.23
   4  -1 -19    1.89    0.13
   4  -1 -19    1.74    0.06
  -4   1  19    1.92    0.13
   5  -1 -20    1.14    0.12
  -5   1  20    1.08    0.12
   6  -1 -21    4.33    0.19
  -6   1  21    4.50    0.20
   7  -1 -22    0.06    0.07
  -7   1  22    0.05    0.08
   8  -1 -23    0.48    0.09
  -8   1  23    0.51    0.10
   9  -1 -24    0.18    0.09
  -9   1  24    0.11    0.09
 -13   0  -3    0.16    0.07
  13   0   3    0.11    0.08
 -12   0  -4   19.68    0.55
  12   0   4   19.58    0.55
 -11   0  -5    0.21    0.07
  11   0   5    0.20    0.07
 -10   0  -6    0.00    0.06
  -9   0  -7    2.32    0.13
   9   0   7    2.39    0.14
  -8   0  -8    2.62    0.13
   8   0   8    2.79    0.14
  -7   0  -9    0.64    0.08
   7   0   9    0.88    0.10
  -6   0 -10    1.81    0.08
  -6   0 -10    1.75    0.10
   6   0  10    1.77    0.11
  -5   0 -11    1.60    0.09
   5   0  11    1.54    0.10
  -4   0 -12    6.23    0.20
   4   0  12    6.23    0.20
  -3   0 -13    0.13    0.05
   3   0  13    0.12    0.06
  -2   0 -14    2.57    0.11
   2   0  14    2.41    0.09
   2   0  14    2.67    0.12
  -1   0 -15    0.56    0.07
   1   0  15    0.74    0.09
   1   0  15    0.57    0.05
   0   0  16   15.89    0.43
   0   0  16   15.74    0.40
   1   0 -17    0.25    0.06
  -1   0  17    0.39    0.04
  -1   0  17    0.31    0.06
   2   0 -18    2.96    0.13
  -2   0  18    2.91    0.14
   3   0 -19    0.03    0.06
  -3   0  19    0.05    0.06
   4   0 -20    7.39    0.25
  -4   0  20    7.52    0.25
   6   0 -22   12.71    0.38
  -6   0  22   12.70    0.39
   7   0 -23    0.04    0.07
  -7   0  23    0.00    0.08
   8   0 -24    0.92    0.13
  -8   0  24    0.80    0.13
  -9   0  25   -0.13    0.08
 -13   1  -4    0.27    0.08
  13  -1   4    0.34    0.10
 -12   1  -5    1.21    0.12
  12  -1   5    1.33    0.13
 -11   1  -6    1.18    0.12
  11  -1   6    1.23    0.14
 -10   1  -7    1.76    0.12
  10  -1   7    1.72    0.14
  -9   1  -8    9.74    0.30
   9  -1   8    9.45    0.30
  -8   1  -9    3.48    0.15
   8  -1   9    3.43    0.16
  -7   1 -10    6.29    0.21
   7  -1  10    6.51    0.22
  -6   1 -11    4.07    0.15
  -6   1 -11    4.47    0.16
   6  -1  11    4.32    0.17
  -5   1 -12    0.07    0.05
   5  -1  12    0.08    0.05
  -4   1 -13    1.89    0.10
   4  -1  13    1.79    0.10
  -3   1 -14    4.30    0.15
   3  -1  14    4.34    0.16
  -2   1 -15    2.77    0.12
   2  -1  15    2.85    0.13
  -1   1 -16    1.19    0.08
   1  -1  16    1.18    0.10
   1  -1  16    1.13    0.06
   0   1 -17    6.70    0.20
   0  -1  17    6.51    0.22
   0  -1  17    6.39    0.17
  -1  -1  18    1.11    0.05
  -1  -1  18    1.12    0.11
   2   1 -19    2.98    0.14
  -2  -1  19    3.18    0.15
   3   1 -20    5.11    0.19
  -3  -1  20    4.98    0.20
   4   1 -21    0.18    0.07
  -4  -1  21    0.31    0.08
   5   1 -22    3.63    0.17
  -5  -1  22    3.50    0.18
   6   1 -23    1.31    0.13
  -6  -1  23    1.34    0.14
   7   1 -24    1.73    0.14
  -7  -1  24    1.80    0.15
   8   1 -25    0.62    0.13
  -8  -1  25    0.73    0.14
 -13   2  -5    1.89    0.14
  13  -2   5    2.03    0.17
 -12   2  -6    2.11    0.14
  12  -2   6    2.03    0.15
 -11   2  -7    0.51    0.11
  11  -2   7    0.73    0.12
 -10   2  -8   26.60    0.70
  10  -2   8   25.60    0.70
  -9   2  -9    3.56    0.16
   9  -2   9    3.18    0.17
  -8   2 -10   35.46    0.90
   8  -2  10   33.80    0.89
  -7   2 -11    1.23    0.10
  -7   2 -11    1.57    0.09
   7  -2  11    1.54    0.12
  -6   2 -12   28.92    0.73
  -6   2 -12   28.50    0.74
   6  -2  12   28.88    0.75
  -5   2 -13    4.60    0.17
   5  -2  13    4.60    0.17
  -4   2 -14    7.22    0.23
   4  -2  14    7.63    0.24
  -3   2 -15    0.05    0.04
   3  -2  15    0.12    0.06
  -2   2 -16   19.28    0.52
   2  -2  16   19.93    0.52
  -1   2 -17    7.45    0.22
   1  -2  17    6.84    0.19
   1  -2  17    7.31    0.23
   0   2 -18    0.11    0.05
   0  -2  18    0.08    0.02
   0  -2  18    0.05    0.05
   1   2 -19    0.04    0.04
  -1  -2  19    0.02    0.07
  -2  -2  20    2.42    0.14
   3   2 -21    3.01    0.15
  -3  -2  21    3.30    0.17
   4   2 -22    1.34    0.13
  -4  -2  22    1.56    0.15
   5   2 -23    0.67    0.12
  -5  -2  23    0.61    0.13
   6   2 -24    0.36    0.08
  -6  -2  24    0.35    0.09
   7   2 -25    0.21    0.08
  -7  -2  25    0.29    0.09
   8   2 -26    2.23    0.14
  -8  -2  26    2.07    0.17
 -13   3  -6    0.69    0.12
  13  -3   6    0.63    0.14
 -12   3  -7    0.01    0.07
  12  -3   7    0.15    0.09
 -11   3  -8    6.36    0.24
  11  -3   8    6.82    0.25
 -10   3  -9    1.67    0.13
  10  -3   9    1.95    0.15
   9  -3  10    0.45    0.11
  -8   3 -11    9.36    0.29
   8  -3  11    9.46    0.30
  -7   3 -12    4.97    0.19
  -7   3 -12    4.99    0.17
   7  -3  12    4.93    0.20
  -6   3 -13   12.78    0.36
  -6   3 -13   12.69    0.35
   6  -3  13   12.82    0.37
  -5   3 -14    4.35    0.16
   5  -3  14    4.51    0.18
  -4   3 -15    6.60    0.21
   4  -3  15    6.59    0.22
  -3   3 -16   13.65    0.37
   3  -3  16   13.12    0.38
  -2   3 -17    0.73    0.07
   2  -3  17    0.83    0.10
  -1   3 -18    6.23    0.20
   1  -3  18    6.14    0.22
   0   3 -19    9.05    0.27
   0  -3  19    8.89    0.23
   0  -3  19    9.00    0.28
   1   3 -20    0.54    0.08
  -1  -3  20    0.31    0.08
   2   3 -21    0.76    0.09
  -2  -3  21    0.84    0.12
  -3  -3  22    3.92    0.18
   4   3 -23    0.73    0.13
  -4  -3  23    0.61    0.13
   5   3 -24    0.38    0.08
  -5  -3  24    0.33    0.08
   6   3 -25    0.78    0.12
  -6  -3  25    0.61    0.13
   7   3 -26    0.55    0.09
  -7  -3  26    0.43    0.09
 -13   4  -7    1.35    0.13
  13  -4   7    1.35    0.13
 -12   4  -8    1.47    0.13
  12  -4   8    1.38    0.15
 -11   4  -9    8.07    0.27
  11  -4   9    7.82    0.28
 -10   4 -10    9.69    0.31
  10  -4  10    9.96    0.32
  -9   4 -11   41.21    1.05
   9  -4  11   40.23    1.06
   8  -4  12    3.37    0.20
  -7   4 -13   23.00    0.59
  -7   4 -13   21.91    0.60
   7  -4  13   22.99    0.62
  -6   4 -14    3.59    0.15
  -6   4 -14    3.60    0.15
   6  -4  14    3.95    0.17
  -5   4 -15    0.16    0.05
   5  -4  15    0.12    0.07
  -4   4 -16   10.20    0.30
   4  -4  16   10.40    0.31
  -3   4 -17    8.06    0.24
   3  -4  17    7.86    0.26
  -2   4 -18    4.56    0.17
   2  -4  18    4.88    0.19
  -1   4 -19    0.54    0.08
   1  -4  19    0.65    0.12
   0   4 -20    1.69    0.10
   0  -4  20    1.67    0.14
   1   4 -21    0.90    0.09
  -1  -4  21    0.78    0.12
  -2  -4  22    0.46    0.09
   3   4 -23    2.35    0.12
   4   4 -24    0.28    0.05
  -4  -4  24    0.29    0.09
  -5  -4  25    0.00    0.08
  -6  -4  26    0.54    0.10
   7   4 -27    1.51    0.14
  -7  -4  27    1.34    0.16
 -12   5  -9    2.49    0.15
  12  -5   9    1.94    0.17
 -11   5 -10    0.13    0.07
  11  -5  10    0.05    0.08
 -10   5 -11    0.21    0.06
  10  -5  11    0.26    0.09
  -9   5 -12    0.26    0.07
   9  -5  12    0.17    0.09
  -8   5 -13    1.29    0.11
  -8   5 -13    1.26    0.11
   8  -5  13    1.20    0.14
  -7   5 -14   12.44    0.35
   7  -5  14   12.08    0.37
  -6   5 -15    4.45    0.16
  -6   5 -15    3.94    0.17
   6  -5  15    4.14    0.19
  -5   5 -16    2.78    0.13
   5  -5  16    2.85    0.16
  -4   5 -17    0.07    0.05
   4  -5  17    0.21    0.08
  -3   5 -18    0.70    0.09
   3  -5  18    0.61    0.12
  -2   5 -19    8.96    0.27
   2  -5  19    8.97    0.29
  -1   5 -20   10.93    0.32
   1  -5  20   10.59    0.33
   0   5 -21    4.02    0.16
   0  -5  21    3.89    0.18
   1   5 -22    1.23    0.11
  -1  -5  22    1.46    0.14
   2   5 -23    0.68    0.09
   3   5 -24   -0.03    0.05
  -3  -5  24   -0.01    0.08
   4   5 -25    5.61    0.20
  -4  -5  25    5.37    0.23
   5   5 -26    0.64    0.09
  -5  -5  26    0.51    0.10
   6   5 -27    0.38    0.07
  -6  -5  27    0.29    0.10
  12  -6  10    0.22    0.10
 -11   6 -11    0.61    0.11
  11  -6  11    0.71    0.14
 -10   6 -12    0.47    0.10
  10  -6  12    0.46    0.09
  -9   6 -13    0.61    0.09
   9  -6  13    0.59    0.13
  -8   6 -14    0.91    0.10
  -8   6 -14    0.91    0.10
   8  -6  14    1.07    0.14
  -7   6 -15    0.83    0.12
  -7   6 -15    0.75    0.10
   7  -6  15    0.96    0.13
  -6   6 -16    0.10    0.06
  -6   6 -16    0.15    0.07
   6  -6  16   -0.12    0.08
   5  -6  17    0.06    0.08
  -4   6 -18   19.99    0.57
   4  -6  18   20.91    0.56
  -3   6 -19    2.34    0.13
   3  -6  19    2.50    0.16
  -2   6 -20    2.84    0.15
   2  -6  20    2.84    0.16
   1  -6  21    2.76    0.16
   0   6 -22    1.92    0.11
   0  -6  22    1.96    0.15
   1   6 -23    0.04    0.05
   2   6 -24    0.14    0.05
  -2  -6  24    0.06    0.08
   3   6 -25   -0.01    0.05
  -3  -6  25    0.02    0.08
   4   6 -26    0.20    0.05
  -4  -6  26    0.30    0.09
   5   6 -27    1.43    0.12
  -5  -6  27    1.13    0.17
 -11   7 -12   -0.02    0.08
  11  -7  12    0.10    0.09
 -10   7 -13    0.21    0.07
  10  -7  13    0.38    0.10
  -9   7 -14    2.04    0.13
   9  -7  14    2.25    0.16
  -8   7 -15    0.08    0.07
  -8   7 -15   -0.02    0.05
   8  -7  15    0.05    0.08
  -7   7 -16    0.12    0.08
  -7   7 -16    0.16    0.06
   7  -7  16    0.11    0.08
  -6   7 -17    9.31    0.33
  -6   7 -17   10.04    0.30
   6  -7  17    9.96    0.32
  -5   7 -18    0.56    0.09
  -4   7 -19    1.37    0.10
   4  -7  19    1.33    0.16
  -3   7 -20    6.11    0.21
   3  -7  20    6.19    0.23
  -2   7 -21    0.48    0.09
   2  -7  21    0.50    0.10
  -1   7 -22    0.58    0.08
   0   7 -23    0.97    0.09
   0  -7  23    0.86    0.13
   1   7 -24    2.58    0.12
  -1  -7  24    2.74    0.17
   2   7 -25    0.86    0.09
  -2  -7  25    0.83    0.13
   3   7 -26    0.10    0.06
  -3  -7  26    0.23    0.10
   4   7 -27    0.18    0.06
  -4  -7  27    0.11    0.09
 -10   8 -14    0.13    0.08
  10  -8  14    0.21    0.09
  -9   8 -15   -0.03    0.06
   9  -8  15    0.13    0.09
  -8   8 -16   -0.05    0.06
  -8   8 -16    0.16    0.08
   8  -8  16   -0.02    0.08
  -7   8 -17    0.57    0.09
  -7   8 -17    0.52    0.09
   7  -8  17    0.68    0.13
  -6   8 -18    0.21    0.08
  -6   8 -18    0.28    0.06
   6  -8  18    0.22    0.09
  -5   8 -19    3.58    0.15
   5  -8  19    3.77    0.20
  -4   8 -20    0.09    0.06
   4  -8  20    0.01    0.08
  -3   8 -21    5.70    0.20
   3  -8  21    5.98    0.24
  -2   8 -22    0.70    0.09
   2  -8  22    0.63    0.10
  -1   8 -23    1.43    0.10
   1  -8  23    1.62    0.15
   0   8 -24    0.42    0.09
   0  -8  24    0.34    0.09
   1   8 -25    0.48    0.09
  -1  -8  25    0.42    0.09
   2   8 -26   -0.01    0.06
  -2  -8  26    0.01    0.10
   3   8 -27    1.29    0.11
  -3  -8  27    1.09    0.15
  -9   9 -16    0.21    0.07
   9  -9  16    0.17    0.09
  -8   9 -17    2.29    0.14
  -8   9 -17    2.75    0.15
   8  -9  17    2.11    0.17
  -7   9 -18    0.18    0.09
   7  -9  18    0.07    0.09
  -6   9 -19    0.25    0.08
  -6   9 -19    0.13    0.06
   6  -9  19    0.07    0.08
  -5   9 -20    0.19    0.09
  -5   9 -20    0.14    0.06
   5  -9  20    0.08    0.08
  -4   9 -21    0.26    0.06
   4  -9  21    0.32    0.09
  -3   9 -22    1.79    0.12
   3  -9  22    2.17    0.16
  -2   9 -23    0.66    0.09
   2  -9  23    0.72    0.15
  -1   9 -24    0.03    0.06
   1  -9  24    0.02    0.09
   0   9 -25    0.18    0.06
   0  -9  25    0.21    0.09
   1   9 -26    3.53    0.15
  -1  -9  26    3.39    0.19
  -7  10 -19    0.63    0.13
  -7  10 -19    0.96    0.10
   7 -10  19    1.03    0.17
  -6  10 -20    0.23    0.07
  -6  10 -20   -0.04    0.09
   6 -10  20    0.04    0.09
  -5  10 -21    0.22    0.06
   5 -10  21    0.20    0.10
  -4  10 -22    0.32    0.07
   4 -10  22    0.42    0.09
  -3  10 -23   -0.05    0.06
   3 -10  23    0.05    0.09
  -2  10 -24    1.05    0.10
   2 -10  24    0.66    0.11
  -1  10 -25   -0.12    0.07
   1 -10  25    0.02    0.10
  -2 -17   1    6.14    0.23
  -1 -17   0    0.58    0.13
   0 -17  -1    4.46    0.20
   1 -17  -2    1.33    0.15
  -5 -16   3    1.46    0.14
  -4 -16   2    1.24    0.14
  -3 -16   1    0.00    0.07
  -2 -16   0    3.01    0.16
  -1 -16  -1    1.52    0.14
   0 -16  -2    0.29    0.09
   1 -16  -3    0.12    0.08
   2 -16  -4    2.84    0.17
   3 -16  -5    1.83    0.15
   4 -16  -6    1.45    0.15
  -6 -15   3    0.10    0.08
  -5 -15   2    0.60    0.11
  -4 -15   1    0.37    0.08
  -3 -15   0    0.51    0.11
  -2 -15  -1    1.21    0.13
  -1 -15  -2    0.82    0.12
   0 -15  -3   14.66    0.43
   1 -15  -4    3.04    0.16
   2 -15  -5    1.98    0.14
   3 -15  -6    1.18    0.13
   4 -15  -7    1.30    0.13
   5 -15  -8   -0.10    0.08
  -6 -14   2    0.18    0.07
  -5 -14   1    9.17    0.29
  -4 -14   0    1.13    0.12
  -3 -14  -1    4.78    0.20
  -2 -14  -2    0.58    0.09
  -1 -14  -3    0.14    0.07
   0 -14  -4    0.25    0.07
   1 -14  -5    0.54    0.09
   2 -14  -6    4.39    0.19
   3 -14  -7    1.42    0.13
   4 -14  -8    0.02    0.08
   5 -14  -9    0.99    0.14
   6 -14 -10    0.15    0.09
  -6 -13   1    4.39    0.18
  -5 -13   0    2.38    0.14
  -4 -13  -1    1.39    0.13
   0 -13  -5    1.04    0.11
   1 -13  -6    0.28    0.07
   2 -13  -7    0.61    0.12
   3 -13  -8    0.17    0.08
   4 -13  -9    2.87    0.15
   5 -13 -10    3.10    0.17
   6 -13 -11    0.08    0.08
   7 -13 -12    0.45    0.08
  -5 -12  -1    0.42    0.08
  -4 -12  -2   29.80    0.78
  -3 -12  -3    0.70    0.12
  -2 -12  -4    9.17    0.28
  -1 -12  -5    0.26    0.06
   0 -12  -6    0.72    0.12
   1 -12  -7    0.28    0.08
   3 -12  -9    0.40    0.08
   4 -12 -10    0.13    0.08
   5 -12 -11    0.30    0.08
   6 -12 -12    0.32    0.08
   7 -12 -13    0.05    0.07
   8 -12 -14    0.01    0.08
  -6 -11  -1    0.17    0.07
  -5 -11  -2    3.46    0.16
  -4 -11  -3    0.04    0.07
  -3 -11  -4   10.99    0.32
  -2 -11  -5    0.63    0.09
  -1 -11  -6   12.93    0.37
  -1 -11  -6   13.37    0.34
   0 -11  -7    0.98    0.10
   0 -11  -7    1.12    0.08
   1 -11  -8   10.07    0.27
   1 -11  -8   10.20    0.31
   2 -11  -9    0.03    0.04
   2 -11  -9    0.05    0.07
   3 -11 -10    3.31    0.16
   4 -11 -11    3.42    0.14
   5 -11 -12    1.22    0.10
   5 -11 -12    1.37    0.12
  -5  11  12    1.19    0.07
   6 -11 -13    3.72    0.18
   6 -11 -13    3.81    0.16
  -6  11  13    3.58    0.13
   7 -11 -14    0.13    0.07
   7 -11 -14    0.10    0.07
   8 -11 -15    9.76    0.32
   8 -11 -15   10.07    0.32
  -8  11  15    9.67    0.29
  -6 -10  -2    5.73    0.21
  -5 -10  -3   10.57    0.31
  -4 -10  -4    0.12    0.06
  -3 -10  -5    0.12    0.05
  -3 -10  -5    0.13    0.03
  -2 -10  -6   28.56    0.72
  -2 -10  -6   27.46    0.68
  -2 -10  -6   27.55    0.69
  -1 -10  -7    0.15    0.03
  -1 -10  -7    0.19    0.05
   0 -10  -8   28.21    0.72
   0 -10  -8   27.38    0.69
   1 -10  -9   14.89    0.41
   1 -10  -9   14.80    0.39
   2 -10 -10    2.79    0.14
   2 -10 -10    2.59    0.11
   3 -10 -11    0.68    0.11
   3 -10 -11    0.95    0.11
   4 -10 -12    5.55    0.21
   4 -10 -12    5.43    0.19
  -4  10  12    5.60    0.16
   5 -10 -13    0.34    0.08
   5 -10 -13    0.39    0.09
  -5  10  13    0.31    0.07
   6 -10 -14   15.01    0.43
   6 -10 -14   14.92    0.43
  -6  10  14   14.90    0.41
   7 -10 -15    3.43    0.17
   7 -10 -15    3.29    0.16
  -7  10  15    3.38    0.15
   8 -10 -16    3.35    0.16
   8 -10 -16    3.05    0.17
  -8  10  16    3.44    0.15
  -6  -9  -3    5.51    0.16
  -5  -9  -4    7.55    0.21
  -5  -9  -4    8.02    0.25
  -4  -9  -5    9.08    0.27
  -4  -9  -5    8.61    0.23
  -3  -9  -6    0.19    0.06
  -2  -9  -7   22.64    0.56
  -2  -9  -7   22.92    0.59
  -1  -9  -8    0.85    0.09
  -1  -9  -8    0.88    0.05
   0  -9  -9   27.73    0.70
   0  -9  -9   26.95    0.68
   1  -9 -10    2.45    0.10
   1  -9 -10    2.51    0.13
   2  -9 -11    6.09    0.21
   2  -9 -11    6.16    0.19
  -2   9  11    5.86    0.17
  -2   9  11    6.20    0.16
   3  -9 -12    4.44    0.17
   3  -9 -12    4.76    0.17
  -3   9  12    4.62    0.14
   4  -9 -13   12.72    0.36
   4  -9 -13   12.44    0.36
  -4   9  13   12.51    0.34
   5  -9 -14    0.30    0.07
   5  -9 -14    0.11    0.07
  -5   9  14    0.22    0.05
   6  -9 -15    3.36    0.16
   6  -9 -15    3.23    0.16
  -6   9  15    3.39    0.14
   7  -9 -16    1.08    0.11
  -7   9  16    1.20    0.11
   8  -9 -17    2.25    0.16
   8  -9 -17    2.27    0.14
  -8   9  17    2.20    0.13
   9  -9 -18    1.03    0.15
   9  -9 -18    0.65    0.11
  -9   9  18    0.59    0.12
  -7  -8  -3    0.23    0.04
  -6  -8  -4   27.23    0.68
  -5  -8  -5    0.91    0.09
  -5  -8  -5    0.96    0.05
  -4  -8  -6    1.05    0.08
  -4  -8  -6    1.08    0.05
  -3  -8  -7    1.23    0.05
  -3  -8  -7    1.33    0.06
  -3  -8  -7    1.37    0.09
  -2  -8  -8    0.89    0.05
  -2  -8  -8    0.66    0.08
  -2  -8  -8    0.63    0.05
  -2  -8  -8    0.90    0.06
  -1  -8  -9    0.36    0.07
  -1  -8  -9    0.30    0.05
   0  -8 -10    1.45    0.07
   0  -8 -10    1.55    0.10
   1  -8 -11    7.98    0.24
   1  -8 -11    7.99    0.23
  -1   8  11    7.94    0.21
  -1   8  11    8.08    0.21
   2  -8 -12    0.81    0.09
   2  -8 -12    0.82    0.09
  -2   8  12    0.83    0.05
  -2   8  12    0.87    0.06
   3  -8 -13    3.80    0.15
   3  -8 -13    3.87    0.15
  -3   8  13    3.79    0.14
  -3   8  13    4.10    0.13
   4  -8 -14    1.47    0.11
   4  -8 -14    1.24    0.11
  -4   8  14    1.32    0.09
   5  -8 -15    2.48    0.14
   5  -8 -15    2.34    0.13
  -5   8  15    2.27    0.12
   6  -8 -16    6.49    0.24
   6  -8 -16    6.79    0.23
  -6   8  16    6.64    0.22
   7  -8 -17    0.66    0.09
  -7   8  17    0.63    0.10
   8  -8 -18    5.80    0.23
   8  -8 -18    5.53    0.20
  -8   8  18    5.41    0.21
   9  -8 -19    1.53    0.11
   9  -8 -19    1.52    0.15
  -9   8  19    1.24    0.14
 -10  -7  -1    0.33    0.06
  10   7   1    0.36    0.06
  -9  -7  -2    3.66    0.14
   9   7   2    3.70    0.11
  -8  -7  -3   -0.05    0.06
   8   7   3    0.01    0.03
  -7  -7  -4    0.02    0.04
   7   7   4   -0.01    0.02
  -6  -7  -5    6.59    0.19
  -5  -7  -6   11.21    0.29
  -4  -7  -7   22.21    0.57
  -4  -7  -7   21.96    0.55
  -3  -7  -8    5.35    0.16
  -3  -7  -8    5.81    0.18
  -3  -7  -8    5.74    0.16
  -2  -7  -9    1.25    0.06
  -2  -7  -9    1.28    0.08
  -1  -7 -10    3.20    0.12
  -1  -7 -10    3.06    0.11
   0  -7 -11    3.23    0.13
   0  -7 -11    3.24    0.11
   0   7  11    3.24    0.10
   1  -7 -12    0.78    0.08
   1  -7 -12    0.78    0.08
  -1   7  12    0.83    0.06
  -1   7  12    0.88    0.07
   2  -7 -13    1.94    0.10
   2  -7 -13    2.03    0.13
  -2   7  13    2.29    0.09
  -2   7  13    1.86    0.08
   3  -7 -14    3.43    0.14
   3  -7 -14    3.54    0.14
  -3   7  14    3.53    0.13
  -3   7  14    3.19    0.11
   4  -7 -15    2.06    0.11
   4  -7 -15    2.16    0.13
  -4   7  15    2.11    0.11
   5  -7 -16    2.13    0.12
   5  -7 -16    1.93    0.13
  -5   7  16    2.17    0.12
   6  -7 -17    1.37    0.12
   6  -7 -17    1.34    0.11
   7  -7 -18    0.45    0.09
   7  -7 -18    0.36    0.06
  -7   7  18    0.44    0.08
   8  -7 -19   13.43    0.38
   8  -7 -19   13.42    0.41
  -8   7  19   13.39    0.40
   9  -7 -20    1.20    0.15
  -9   7  20    1.38    0.13
  13   6  -1    3.07    0.15
 -12  -6   0    2.41    0.13
  12   6   0    2.43    0.12
 -11  -6  -1    7.12    0.23
  11   6   1    7.06    0.21
 -10  -6  -2    2.95    0.13
  10   6   2    2.62    0.11
  -9  -6  -3    3.79    0.15
   9   6   3    3.98    0.13
  -8  -6  -4    0.77    0.08
   8   6   4    0.84    0.06
  -7  -6  -5    0.96    0.08
   7   6   5    0.82    0.06
   7   6   5    0.83    0.05
  -6  -6  -6    1.49    0.07
   6   6   6    1.34    0.07
  -5  -6  -7   14.49    0.38
   5   6   7   15.01    0.36
   5   6   7   14.21    0.36
  -4  -6  -8   20.81    0.54
  -4  -6  -8   20.96    0.51
  -4  -6  -8   21.07    0.53
   4   6   8   20.94    0.51
   4   6   8   21.01    0.51
  -3  -6  -9    0.62    0.07
  -3  -6  -9    0.69    0.05
   3   6   9    0.73    0.04
   3   6   9    0.72    0.04
  -2  -6 -10    2.27    0.11
  -2  -6 -10    2.27    0.09
   2   6  10    2.27    0.07
   2   6  10    2.16    0.07
  -1  -6 -11    3.48    0.13
  -1  -6 -11    3.49    0.12
   1   6  11    3.59    0.11
   1   6  11    3.56    0.11
   0  -6 -12    0.47    0.07
   0  -6 -12    0.44    0.07
   0   6  12    0.55    0.06
   0   6  12    0.50    0.08
   1  -6 -13    5.87    0.18
   1  -6 -13    5.96    0.19
  -1   6  13    5.88    0.17
  -1   6  13    5.76    0.17
   2  -6 -14    2.81    0.12
   2  -6 -14    2.79    0.13
  -2   6  14    2.88    0.11
  -2   6  14    2.52    0.11
   3  -6 -15    0.23    0.05
   3  -6 -15    0.19    0.05
  -3   6  15    0.17    0.05
   4  -6 -16    1.37    0.11
   4  -6 -16    1.24    0.09
  -4   6  16    1.24    0.10
   5  -6 -17    0.79    0.09
   5  -6 -17    0.94    0.12
  -5   6  17    1.01    0.10
   6  -6 -18    0.47    0.08
   6  -6 -18    0.39    0.08
  -6   6  18    0.42    0.08
   7  -6 -19    4.85    0.21
   7  -6 -19    4.57    0.16
  -7   6  19    4.72    0.19
   8  -6 -20    0.16    0.08
  -8   6  20    0.08    0.08
   9  -6 -21    1.12    0.17
  -9   6  21    0.77    0.14
 -13  -5   0    1.88    0.13
  13   5   0    1.95    0.12
  12   5   1    4.28    0.16
 -11  -5  -2    2.21    0.12
  11   5   2    2.09    0.11
 -10  -5  -3    0.31    0.06
  10   5   3    0.41    0.08
  -9  -5  -4   17.00    0.46
   9   5   4   17.46    0.46
  -8  -5  -5    2.79    0.12
   8   5   5    2.83    0.11
  -7  -5  -6    0.78    0.15
   7   5   6    1.00    0.06
   7   5   6    1.04    0.07
  -6  -5  -7    2.40    0.10
   6   5   7    2.41    0.08
   6   5   7    2.44    0.09
  -5  -5  -8    3.19    0.11
   5   5   8    3.00    0.12
   5   5   8    3.09    0.10
  -4  -5  -9   11.01    0.29
   4   5   9   10.86    0.28
   4   5   9   11.21    0.29
  -3  -5 -10    1.56    0.09
  -3  -5 -10    1.54    0.07
   3   5  10    1.61    0.07
   3   5  10    1.60    0.08
  -2  -5 -11    0.08    0.05
  -2  -5 -11    0.11    0.05
   2   5  11    0.09    0.04
   2   5  11    0.09    0.03
  -1  -5 -12    6.94    0.20
  -1  -5 -12    7.28    0.21
   1   5  12    6.82    0.20
   1   5  12    7.32    0.20
   0  -5 -13    1.24    0.08
   0  -5 -13    1.36    0.09
   0   5  13    1.33    0.08
   0   5  13    1.40    0.08
   1  -5 -14    0.51    0.08
   1  -5 -14    0.56    0.06
  -1   5  14    0.42    0.07
  -1   5  14    0.39    0.07
   2  -5 -15   11.29    0.30
   2  -5 -15   10.67    0.30
  -2   5  15   10.46    0.30
   3  -5 -16    0.27    0.05
   3  -5 -16    0.23    0.06
  -3   5  16    0.21    0.05
   4  -5 -17    0.12    0.04
   4  -5 -17    0.04    0.06
  -4   5  17    0.06    0.06
   5  -5 -18   10.18    0.28
   5  -5 -18    9.81    0.31
  -5   5  18   10.21    0.31
   6  -5 -19    0.39    0.08
   6  -5 -19    0.45    0.06
  -6   5  19    0.46    0.09
   7  -5 -20    4.69    0.21
   7  -5 -20    4.95    0.17
  -7   5  20    4.85    0.20
   8  -5 -21    0.19    0.09
  -8   5  21    0.15    0.08
   9  -5 -22    4.86    0.22
  -9   5  22    4.49    0.22
 -13  -4  -1    1.76    0.13
  13   4   1    1.92    0.13
 -12  -4  -2    0.20    0.09
 -11  -4  -3    3.81    0.17
 -10  -4  -4    3.98    0.16
  10   4   4    3.93    0.16
  -9  -4  -5   13.29    0.37
   9   4   5   12.89    0.36
  -8  -4  -6   19.32    0.50
   8   4   6   19.49    0.49
   8   4   6   17.52    0.48
  -7  -4  -7   26.07    0.66
   7   4   7   23.88    0.65
   7   4   7   27.22    0.66
   6   4   8   12.14    0.33
   6   4   8   12.78    0.33
  -5  -4  -9    6.22    0.19
   5   4   9    6.10    0.18
  -4  -4 -10    4.79    0.15
   4   4  10    4.62    0.14
   4   4  10    4.89    0.15
  -3  -4 -11    1.85    0.09
   3   4  11    1.72    0.08
   3   4  11    1.83    0.09
  -2  -4 -12  134.50    3.23
  -2  -4 -12  133.97    3.23
   2   4  12  130.42    3.23
   2   4  12  132.44    3.23
  -1  -4 -13    0.45    0.08
  -1  -4 -13    0.41    0.08
   1   4  13    0.48    0.07
   1   4  13    0.50    0.07
   0  -4 -14   10.68    0.31
   0   4  14   10.94    0.29
   0   4  14   10.23    0.29
   1  -4 -15    1.47    0.09
  -1   4  15    1.33    0.09
   2  -4 -16    5.48    0.19
  -2   4  16    5.78    0.19
   3  -4 -17    2.27    0.12
   3  -4 -17    2.41    0.11
  -3   4  17    2.18    0.12
   4  -4 -18    1.11    0.08
   4  -4 -18    1.07    0.11
  -4   4  18    1.01    0.11
   5  -4 -19    8.81    0.24
   5  -4 -19    8.63    0.28
  -5   4  19    8.27    0.27
   6  -4 -20    0.95    0.07
  -6   4  20    1.07    0.14
   7  -4 -21    0.33    0.08
  -7   4  21    0.33    0.08
   8  -4 -22    0.09    0.08
  -8   4  22    0.01    0.07
   9  -4 -23    1.29    0.15
  -9   4  23    1.60    0.15
 -13  -3  -2    0.68    0.12
 -12  -3  -3    0.51    0.11
  12   3   3    0.30    0.07
 -11  -3  -4    3.72    0.16
  11   3   4    3.41    0.16
 -10  -3  -5    3.95    0.17
  10   3   5    4.06    0.17
  -9  -3  -6    6.84    0.22
   9   3   6    6.60    0.22
  -8  -3  -7    1.41    0.10
   8   3   7    1.27    0.10
  -7  -3  -8   45.93    1.15
   7   3   8   45.90    1.14
  -6  -3  -9    1.58    0.08
   6   3   9    1.28    0.07
   6   3   9    1.39    0.09
  -5  -3 -10    6.96    0.21
   5   3  10    7.09    0.20
   5   3  10    6.38    0.19
   4   3  11    2.87    0.11
   4   3  11    3.28    0.12
  -3  -3 -12   11.11    0.31
   3   3  12   11.63    0.31
   3   3  12   10.90    0.30
   2   3  13    0.11    0.04
   2   3  13    0.12    0.05
  -1  -3 -14   11.51    0.30
  -1  -3 -14   11.46    0.31
   1   3  14   10.75    0.30
   1   3  14   11.57    0.31
   0  -3 -15    8.20    0.23
   0  -3 -15    8.15    0.24
   0   3  15    8.46    0.25
   1  -3 -16    0.30    0.06
   1  -3 -16    0.25    0.05
  -1   3  16    0.19    0.06
   2  -3 -17    5.70    0.19
   2  -3 -17    5.52    0.16
  -2   3  17    5.59    0.19
   3  -3 -18    0.22    0.04
   3  -3 -18    0.21    0.06
  -3   3  18    0.19    0.06
   4  -3 -19    2.17    0.09
   4  -3 -19    2.03    0.14
  -4   3  19    2.28    0.13
   5  -3 -20    7.24    0.25
   6  -3 -21    7.06    0.25
  -6   3  21    6.97    0.25
   7  -3 -22    0.50    0.09
  -7   3  22    0.58    0.12
   8  -3 -23    0.79    0.14
  -8   3  23    0.81    0.13
   9  -3 -24    0.21    0.09
  -9   3  24   -0.04    0.08
 -13  -2  -3    0.51    0.08
  13   2   3    0.47    0.11
 -12  -2  -4    8.46    0.29
  12   2   4    8.95    0.29
 -11  -2  -5    0.85    0.10
  11   2   5    0.81    0.12
 -10  -2  -6   47.25    1.20
  10   2   6   47.45    1.20
  -9  -2  -7   24.79    0.66
   9   2   7   25.48    0.66
  -8  -2  -8    1.54    0.11
   8   2   8    1.71    0.12
  -7  -2  -9    1.31    0.09
   7   2   9    1.08    0.09
  -6  -2 -10    1.53    0.09
  -6  -2 -10    1.51    0.06
   6   2  10    1.52    0.10
  -5  -2 -11    2.80    0.11
   5   2  11    2.64    0.12
  -4  -2 -12   36.13    0.89
   4   2  12   35.00    0.89
  -3  -2 -13    0.32    0.05
   3   2  13    0.32    0.05
  -2  -2 -14    1.58    0.09
   2   2  14    1.60    0.10
   1   2  15    5.81    0.19
   0  -2 -16    0.19    0.05
   0   2  16    0.30    0.05
   0   2  16    0.28    0.06
   1  -2 -17    1.23    0.10
   1  -2 -17    1.23    0.06
  -1   2  17    1.18    0.07
  -1   2  17    1.08    0.10
   2  -2 -18    8.24    0.26
   2  -2 -18    8.05    0.22
  -2   2  18    8.46    0.26
   3  -2 -19    0.77    0.05
   3  -2 -19    0.70    0.09
  -3   2  19    0.73    0.10
   4  -2 -20    1.29    0.12
   4  -2 -20    1.13    0.05
  -4   2  20    1.27    0.12
  -5   2  21    1.10    0.12
   6  -2 -22    0.92    0.13
  -6   2  22    1.02    0.13
   7  -2 -23    0.41    0.08
  -7   2  23    0.32    0.08
   8  -2 -24    1.75    0.15
  -8   2  24    1.53    0.15
 -13  -1  -4    0.50    0.11
  13   1   4    0.48    0.09
 -12  -1  -5    1.52    0.13
  12   1   5    1.16    0.13
 -11  -1  -6    1.37    0.14
  11   1   6    1.73    0.14
 -10  -1  -7    1.79    0.13
  -9  -1  -8   10.12    0.31
   9   1   8   10.15    0.31
  -8  -1  -9    3.56    0.15
   8   1   9    3.47    0.15
  -7  -1 -10    6.28    0.20
   7   1  10    6.03    0.21
  -6  -1 -11    4.46    0.13
  -6  -1 -11    4.38    0.16
   6   1  11    4.36    0.16
  -5  -1 -12    0.15    0.04
   5   1  12    0.05    0.05
  -4  -1 -13    1.92    0.10
   4   1  13    1.88    0.11
  -3  -1 -14    4.35    0.15
   3   1  14    4.43    0.16
  -2  -1 -15    2.63    0.11
   2   1  15    2.84    0.12
  -1  -1 -16    1.18    0.08
   1   1  16    1.10    0.06
   1   1  16    0.96    0.09
   0  -1 -17    6.66    0.21
   0   1  17    6.40    0.21
   0   1  17    6.28    0.18
   1  -1 -18    1.11    0.10
  -1   1  18    1.19    0.10
  -1   1  18    1.04    0.06
   2  -1 -19    3.11    0.15
  -2   1  19    3.07    0.15
   3  -1 -20    4.83    0.19
   3  -1 -20    4.75    0.13
  -3   1  20    5.00    0.19
   4  -1 -21    0.12    0.07
  -4   1  21    0.20    0.08
   5  -1 -22    3.66    0.18
  -5   1  22    3.95    0.18
   6  -1 -23    1.42    0.14
  -6   1  23    1.64    0.14
   7  -1 -24    1.60    0.16
  -7   1  24    2.01    0.15
   8  -1 -25    0.72    0.13
  -8   1  25    0.53    0.10
 -13   0  -5    0.44    0.08
  13   0   5    0.29    0.08
 -12   0  -6    0.12    0.07
  12   0   6    0.03    0.07
 -11   0  -7    0.09    0.07
  11   0   7    0.13    0.08
 -10   0  -8    0.74    0.10
  10   0   8    0.87    0.14
  -9   0  -9    0.36    0.07
   9   0   9    0.38    0.08
  -8   0 -10    1.15    0.10
   8   0  10    1.25    0.11
  -7   0 -11    0.97    0.07
  -7   0 -11    0.88    0.09
   7   0  11    1.04    0.10
  -6   0 -12   15.33    0.40
  -6   0 -12   15.97    0.42
   6   0  12   15.02    0.42
  -5   0 -13    0.01    0.04
   5   0  13    0.00    0.05
  -4   0 -14   24.96    0.65
   4   0  14   25.15    0.65
  -3   0 -15    0.06    0.05
   3   0  15    0.07    0.05
  -2   0 -16    1.10    0.08
   2   0  16    0.95    0.10
  -1   0 -17    0.06    0.04
   1   0  17   -0.02    0.03
   1   0  17    0.04    0.05
   0   0 -18   10.27    0.29
   0   0  18    9.58    0.26
   0   0  18    9.79    0.29
   1   0 -19    0.03    0.06
  -1   0  19   -0.01    0.06
  -1   0  19    0.01    0.03
   2   0 -20    0.21    0.07
  -2   0  20    0.26    0.07
   3   0 -21    0.70    0.11
  -3   0  21    0.92    0.12
   5   0 -23    0.14    0.08
  -5   0  23    0.17    0.08
   6   0 -24    1.07    0.13
  -6   0  24    1.10    0.13
   7   0 -25    0.03    0.08
  -7   0  25    0.07    0.08
   8   0 -26    0.10    0.08
  -8   0  26    0.06    0.09
 -13   1  -6   -0.09    0.08
  13  -1   6    0.08    0.08
 -12   1  -7    0.22    0.07
  12  -1   7    0.10    0.07
 -11   1  -8   10.61    0.33
  11  -1   8   10.24    0.33
 -10   1  -9    2.62    0.17
  10  -1   9    2.76    0.16
  -9   1 -10   14.65    0.41
   9  -1  10   13.56    0.44
  -8   1 -11    3.57    0.16
   8  -1  11    3.72    0.17
  -7   1 -12    1.68    0.11
  -7   1 -12    1.45    0.09
   7  -1  12    1.51    0.12
  -6   1 -13   33.65    0.86
   6  -1  13   33.81    0.87
  -5   1 -14    4.57    0.16
   5  -1  14    4.50    0.17
  -4   1 -15    0.50    0.07
   4  -1  15    0.37    0.07
  -3   1 -16    1.81    0.09
   3  -1  16    1.84    0.11
  -2   1 -17    0.75    0.07
   2  -1  17    0.72    0.10
  -1   1 -18    1.94    0.10
   1  -1  18    1.80    0.07
   1  -1  18    2.09    0.12
   0   1 -19    2.58    0.12
   0  -1  19    2.68    0.09
   0  -1  19    2.73    0.14
  -1  -1  20   -0.01    0.07
  -1  -1  20    0.06    0.02
   2   1 -21    1.57    0.13
  -2  -1  21    1.34    0.13
   3   1 -22    3.82    0.17
  -3  -1  22    4.09    0.18
   4   1 -23    0.10    0.07
  -4  -1  23    0.08    0.07
   5   1 -24    2.23    0.15
  -5  -1  24    2.30    0.16
   6   1 -25    0.63    0.14
  -6  -1  25    1.04    0.13
   7   1 -26    3.37    0.18
  -7  -1  26    3.02    0.18
 -13   2  -7    3.72    0.18
  13  -2   7    3.33    0.19
 -12   2  -8    0.18    0.07
  12  -2   8    0.26    0.09
 -11   2  -9    0.03    0.06
  11  -2   9    0.09    0.08
 -10   2 -10    1.71    0.12
  10  -2  10    1.30    0.13
   9  -2  11    0.02    0.08
  -8   2 -12   23.88    0.64
   8  -2  12   23.86    0.64
  -7   2 -13    4.15    0.15
  -7   2 -13    3.91    0.17
   7  -2  13    4.16    0.18
  -6   2 -14   28.75    0.75
   6  -2  14   29.25    0.76
  -5   2 -15    0.36    0.06
   5  -2  15    0.36    0.07
  -4   2 -16   11.32    0.32
   4  -2  16   11.11    0.33
  -3   2 -17    1.42    0.10
   3  -2  17    1.33    0.12
  -2   2 -18    0.39    0.08
   2  -2  18    0.34    0.07
  -1   2 -19   21.14    0.55
   1  -2  19   21.21    0.56
   1  -2  19   19.83    0.52
   0   2 -20    4.14    0.16
   0  -2  20    4.02    0.12
   0  -2  20    4.22    0.18
   1   2 -21    1.17    0.09
  -1  -2  21    1.24    0.13
  -2  -2  22    0.29    0.08
   3   2 -23    0.54    0.13
   4   2 -24    0.07    0.07
  -4  -2  24   -0.11    0.08
   5   2 -25    0.84    0.12
  -5  -2  25    0.90    0.13
   6   2 -26    0.82    0.12
  -6  -2  26    0.65    0.13
   7   2 -27    0.28    0.09
  -7  -2  27    0.30    0.09
 -13   3  -8    1.43    0.15
  13  -3   8    0.89    0.15
 -12   3  -9    0.29    0.08
  12  -3   9    0.32    0.09
 -11   3 -10   10.61    0.33
  11  -3  10   10.29    0.34
 -10   3 -11    0.38    0.07
  10  -3  11    0.39    0.09
  -9   3 -12    3.10    0.15
   9  -3  12    3.22    0.17
  -8   3 -13   16.75    0.45
  -7   3 -14    7.74    0.25
  -7   3 -14    7.66    0.24
   7  -3  14    7.76    0.27
  -6   3 -15   11.94    0.34
   6  -3  15   11.29    0.35
  -5   3 -16    7.80    0.25
[truncated: 123,108 more chars]
